# Supplementary material for: Transcriptome Analysis Reveals Candidate Genes Regulating the Skin and Hair Diversity of Xinji Fine-Wool Sheep and Tan Sheep
Source: MDPI journal article supplement (doi:10.3390/agriculture12010015), 2021-12-23
Supplement: s1 [file s1]

Archive with 17 entries (17 files):
- agriculture-1480218 supplementary Figure S1.pdf
- Supplementary Table S1.xls
- Supplementary Table S10.xlsx
- Supplementary Table S11.xls
- Supplementary Table S12.xlsx
- Supplementary Table S13.xls
- Supplementary Table S14.xls
- Supplementary Table S15.xls
- Supplementary Table S16.xls
- Supplementary Table S2.xls
- Supplementary Table S3 .xlsx
- Supplementary Table S4.xlsx
- Supplementary Table S5.xlsx
- Supplementary Table S6.xlsx
- Supplementary Table S7.xls
- Supplementary Table S8.xls
- Supplementary Table S9.xlsx
