# Supplementary material for: Transcriptome Analysis Reveals Candidate Genes Regulating the Skin and Hair Diversity of Xinji Fine-Wool Sheep and Tan Sheep
Source: MDPI journal article supplement (doi:10.3390/agriculture12010015), 2021-12-23
Supplement: s1 [file s1 › agriculture-1480218 supplementary Figure S1.pdf]

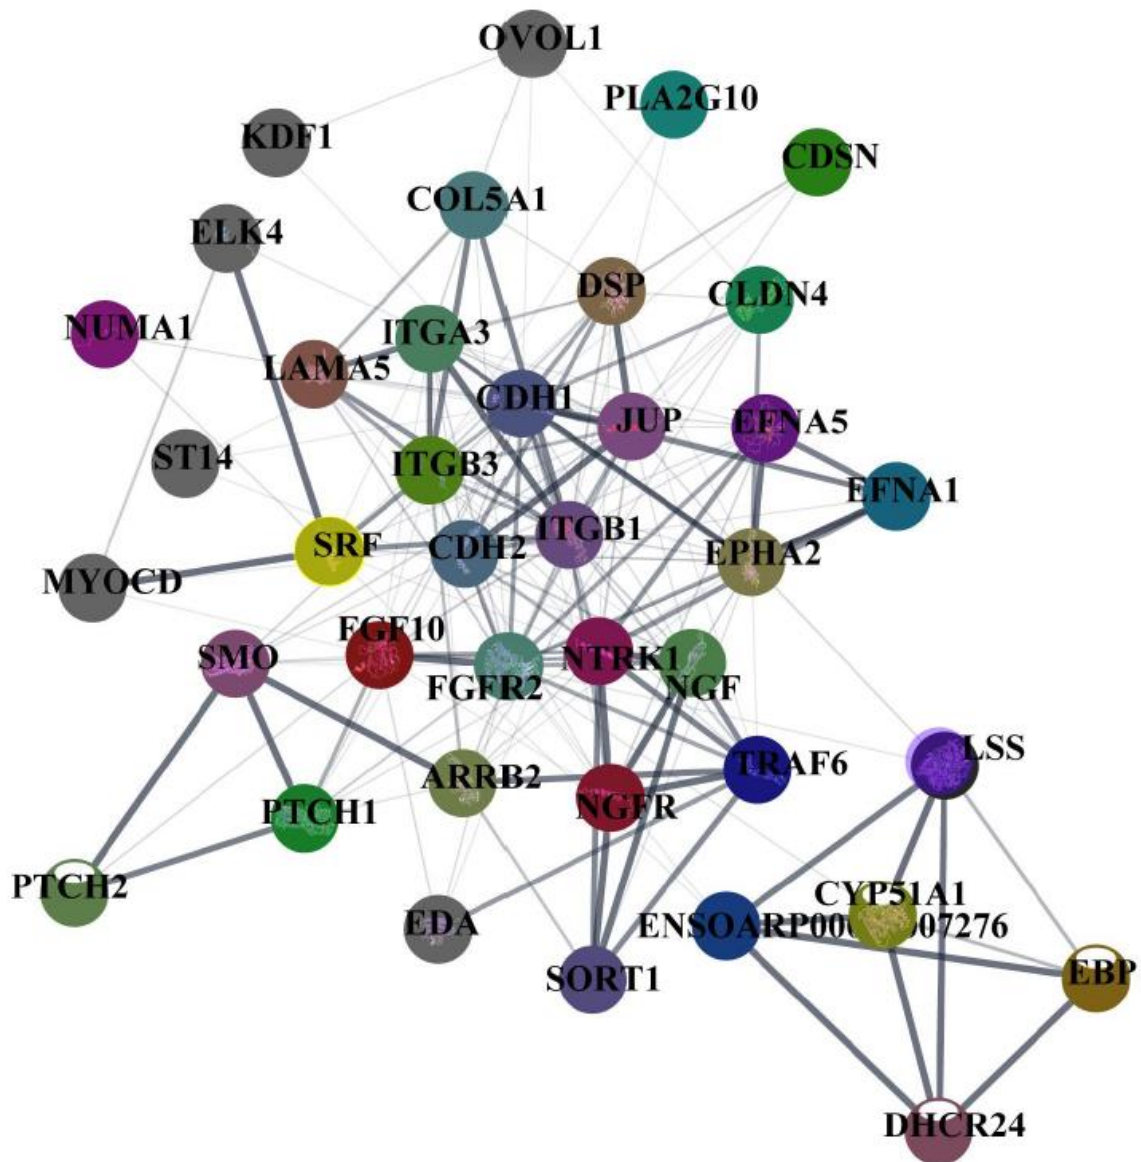

**Supplementary Figure S1.** Protein-protein interaction analysis of skin development(GO:0043588). Protein interaction network of core genes generated using string version 11.0. All information is based on string data [high confidence (0.700)], each node represents a protein and each edge represents an interaction.
