# Supplementary material for: Transcriptome Analysis Reveals Candidate Genes Regulating the Skin and Hair Diversity of Xinji Fine-Wool Sheep and Tan Sheep
Source: MDPI journal article supplement (doi:10.3390/agriculture12010015), 2021-12-23
Supplement: s1 [file s1 › Supplementary Table S1.xls]

## Sheet: Sheet1
Table S1 | Detailed information of primers used for qPCR analysis.
Gene	Primers	Tm （℃）	Size(bp)
HOXC13	F: CTCCAACGGCTGGGATAGTC	60	115
	R: GTAGCTGTTGACTTCGGGCT	60	115
OVOL1	F: AGAGACCATGGCTTTCTGCG	60	131
	R: CACTTCATGTGGCGGTTCAG	60	131
SRF	F: ACACGACCTTCAGCAAGAGG	60	111
	R: ACACATGGCCTGTCTCACTG	60	111
NGFR	F:ACCAGCACTGTGTCAGATGT	60	156
	R:GTTCCACCTCTTGAAGGCGA	60	156
LAMA5	F:TGAACGCCTCCATCACTGAC	60	111
	R:GCCCAAGGCTTGAGATCTGT	60	111
CDSN	F: AATCTACCCGGTGGGCTACT	60	100
	R: GTACTTGCCCTCAGAGACGG	60	100
KDF1	F: GGATGAACTCACGGTGCAGA	60	133
	R: TGAAGAGTCTGTGTCGGTGC	60	133
SMO	F: TCTGTGAGCGGCATCTGTTT	60	186
	R: ATTGATCTTGCTGGCTGCCT	60	186
DHCR24	F: TCTCACTGCGGGTTGGAAAG	60	161
	R: CAGAGTCCAGCCAATGGAGG	60	161
GAPDH	F: TGATGCTGGTGCTGAGTACG	60	117
	R: GGTTCACGCCCATCACAAAC	60	117
