# Supplementary material for: Transcriptome Analysis Reveals Candidate Genes Regulating the Skin and Hair Diversity of Xinji Fine-Wool Sheep and Tan Sheep
Source: MDPI journal article supplement (doi:10.3390/agriculture12010015), 2021-12-23
Supplement: s1 [file s1 › Supplementary Table S2.xls]

## Sheet: Sheet1
Table S2 | Summary of raw reads after quality control and mapping to the reference genome.
Breed	Sample	Raw Reads Number	Clean Reads Number	Clean Reads Rate (%)	Q30 (%)	Mapped Reads	Mapping Rate (%)
12-month-old Xinji fine wool sheep	X1	48909966	47781275	97.6923	91.25	3.50246e+07	73.3019
	X2	42652968	42041790	98.5671	92.11	3.08705e+07	73.4282
	X3	44363845	43636058	98.3595	92.36	3.16815e+07	74.604
3-month-old Xinji fine wool sheep	S1	36405227	35806026	98.3541	92.14	2.89009e+07	80.7152
	S2	43859699	42846686	97.6903	92.54	34925015	81.5116
	S3	49849740	48802770	97.8997	91.53	3.89408e+07	79.7922
	S4	54896030	53572207	97.5885	92.71	44870738	83.7575
12-month-old Tan sheep	C1	46741239	45500599	97.3457	93.175	3.69677e+07	81.2467
	C2	35512927	34383683	96.8202	91.24	26771174	77.8601
	C3	49378137	45774015	92.701	91.515	3.46917e+07	75.7891
	C4	32687791	31901631	97.5949	92.23	25598325	80.2414
	C5	35565411	34517497	97.0536	91.75	2.77867e+07	80.5004
	C6	39029622	38068753	97.5381	91.88	30398172	79.8507
