# Supplementary material for: Transcriptome Analysis Reveals Candidate Genes Regulating the Skin and Hair Diversity of Xinji Fine-Wool Sheep and Tan Sheep
Source: MDPI journal article supplement (doi:10.3390/agriculture12010015), 2021-12-23
Supplement: s1 [file s1 › Supplementary Table S3 .xlsx]

## Sheet: 3个TPM统计绘图
Table S3 | Statistical analysis of TPM value.
	X1	X2	X3	S1	S2	S3	S4	C1	C2	C3	C4	C5	C6
≤1	7006	6403	6877	6306	6459	6367	6794	6219	6361	7789	5971	6405	5946
1-10	4978	4216	4583	4162	4735	4539	4964	4407	4734	6207	4300	5227	4329
≥10	8695	10060	9219	10211	9485	9773	8921	10053	9584	6683	10408	9047	10404
