# Supplementary material for: Transcriptome Analysis Reveals Candidate Genes Regulating the Skin and Hair Diversity of Xinji Fine-Wool Sheep and Tan Sheep
Source: MDPI journal article supplement (doi:10.3390/agriculture12010015), 2021-12-23
Supplement: s1 [file s1 › Supplementary Table S4.xlsx]

## Sheet: seed_cor_results
Table S4 | Statistical analysis of Pearson's correlation coefficient value.
Parameter1	Parameter2	r	CI	CI_low	CI_high	t	df_error	p	Method	n_Obs
X1	X2	0.900562	0.95	0.897556	0.903484	258.919	15622	0	Pearson correlation	15624
X1	X3	0.915	0.95	0.912411	0.917517	283.463	15622	0	Pearson correlation	15624
X1	S1	0.84024	0.95	0.835569	0.84479	193.687	15622	0	Pearson correlation	15624
X1	S2	0.835036	0.95	0.830227	0.839722	189.696	15622	0	Pearson correlation	15624
X1	S3	0.747143	0.95	0.740133	0.75399	140.498	15622	0	Pearson correlation	15624
X1	S4	0.725557	0.95	0.718046	0.732899	131.78	15622	0	Pearson correlation	15624
X1	C1	0.764384	0.95	0.757786	0.770825	148.177	15622	0	Pearson correlation	15624
X1	C2	0.672347	0.95	0.663663	0.680849	113.525	15622	0	Pearson correlation	15624
X1	C3	0.714702	0.95	0.706944	0.722288	127.717	15622	0	Pearson correlation	15624
X1	C4	0.805098	0.95	0.799511	0.810546	169.652	15622	0	Pearson correlation	15624
X1	C5	0.634621	0.95	0.625161	0.643894	102.637	15622	0	Pearson correlation	15624
X1	C6	0.703464	0.95	0.695455	0.711298	123.71	15622	0	Pearson correlation	15624
X2	X3	0.982255	0.95	0.981695	0.982798	654.593	15622	0	Pearson correlation	15624
X2	S1	0.6707	0.95	0.661982	0.679237	113.019	15622	0	Pearson correlation	15624
X2	S2	0.653244	0.95	0.644162	0.662142	107.836	15622	0	Pearson correlation	15624
X2	S3	0.580981	0.95	0.570498	0.591275	89.2175	15622	0	Pearson correlation	15624
X2	S4	0.525476	0.95	0.514031	0.536734	77.1951	15622	0	Pearson correlation	15624
X2	C1	0.606865	0.95	0.596864	0.616677	95.4333	15622	0	Pearson correlation	15624
X2	C2	0.516303	0.95	0.504708	0.527711	75.3517	15622	0	Pearson correlation	15624
X2	C3	0.537814	0.95	0.526575	0.548866	79.7335	15622	0	Pearson correlation	15624
X2	C4	0.627661	0.95	0.618064	0.637071	100.773	15622	0	Pearson correlation	15624
X2	C5	0.471987	0.95	0.459709	0.484085	66.9151	15622	0	Pearson correlation	15624
X2	C6	0.566577	0.95	0.555835	0.57713	85.94	15622	0	Pearson correlation	15624
X3	S1	0.671688	0.95	0.66299	0.680204	113.322	15622	0	Pearson correlation	15624
X3	S2	0.66536	0.95	0.656529	0.674008	111.399	15622	0	Pearson correlation	15624
X3	S3	0.573124	0.95	0.562499	0.58356	87.4147	15622	0	Pearson correlation	15624
X3	S4	0.520815	0.95	0.509294	0.53215	76.254	15622	0	Pearson correlation	15624
X3	C1	0.602155	0.95	0.592065	0.612057	94.2688	15622	0	Pearson correlation	15624
X3	C2	0.505724	0.95	0.493961	0.517302	73.2697	15622	0	Pearson correlation	15624
X3	C3	0.526614	0.95	0.515187	0.537853	77.4262	15622	0	Pearson correlation	15624
X3	C4	0.630339	0.95	0.620794	0.639696	101.485	15622	0	Pearson correlation	15624
X3	C5	0.46298	0.95	0.450571	0.475211	65.2854	15622	0	Pearson correlation	15624
X3	C6	0.558403	0.95	0.547517	0.5691	84.1324	15622	0	Pearson correlation	15624
S1	S2	0.95788	0.95	0.956567	0.959154	416.909	15622	0	Pearson correlation	15624
S1	S3	0.958764	0.95	0.957478	0.960011	421.647	15622	0	Pearson correlation	15624
S1	S4	0.917981	0.95	0.915478	0.920413	289.282	15622	0	Pearson correlation	15624
S1	C1	0.909851	0.95	0.907112	0.912513	274.068	15622	0	Pearson correlation	15624
S1	C2	0.799032	0.95	0.793291	0.804631	166.092	15622	0	Pearson correlation	15624
S1	C3	0.841802	0.95	0.837172	0.846311	194.92	15622	0	Pearson correlation	15624
S1	C4	0.935175	0.95	0.933179	0.937114	330.013	15622	0	Pearson correlation	15624
S1	C5	0.809624	0.95	0.804153	0.814959	172.406	15622	0	Pearson correlation	15624
S1	C6	0.887281	0.95	0.883898	0.890571	240.443	15622	0	Pearson correlation	15624
S2	S3	0.967845	0.95	0.966837	0.968822	480.898	15622	0	Pearson correlation	15624
S2	S4	0.956561	0.95	0.955208	0.957874	410.106	15622	0	Pearson correlation	15624
S2	C1	0.931547	0.95	0.929443	0.93359	320.202	15622	0	Pearson correlation	15624
S2	C2	0.869652	0.95	0.865778	0.873422	220.182	15622	0	Pearson correlation	15624
S2	C3	0.835602	0.95	0.830808	0.840273	190.121	15622	0	Pearson correlation	15624
S2	C4	0.963633	0.95	0.962496	0.964736	450.709	15622	0	Pearson correlation	15624
S2	C5	0.883397	0.95	0.879905	0.886794	235.613	15622	0	Pearson correlation	15624
S2	C6	0.924448	0.95	0.922135	0.926695	303.022	15622	0	Pearson correlation	15624
S3	S4	0.971179	0.95	0.970274	0.972056	509.272	15622	0	Pearson correlation	15624
S3	C1	0.917963	0.95	0.91546	0.920395	289.247	15622	0	Pearson correlation	15624
S3	C2	0.83951	0.95	0.834819	0.844079	193.117	15622	0	Pearson correlation	15624
S3	C3	0.824969	0.95	0.819895	0.829914	182.44	15622	0	Pearson correlation	15624
S3	C4	0.931737	0.95	0.929638	0.933775	320.697	15622	0	Pearson correlation	15624
S3	C5	0.885927	0.95	0.882506	0.889254	238.733	15622	0	Pearson correlation	15624
S3	C6	0.915195	0.95	0.912612	0.917706	283.835	15622	0	Pearson correlation	15624
S4	C1	0.885772	0.95	0.882346	0.889103	238.538	15622	0	Pearson correlation	15624
S4	C2	0.825465	0.95	0.820404	0.830397	182.784	15622	0	Pearson correlation	15624
S4	C3	0.805331	0.95	0.79975	0.810773	169.792	15622	0	Pearson correlation	15624
S4	C4	0.911548	0.95	0.908858	0.914162	277.078	15622	0	Pearson correlation	15624
S4	C5	0.914119	0.95	0.911504	0.91666	281.798	15622	0	Pearson correlation	15624
S4	C6	0.884767	0.95	0.881313	0.888126	237.29	15622	0	Pearson correlation	15624
C1	C2	0.91129	0.95	0.908593	0.913911	276.615	15622	0	Pearson correlation	15624
C1	C3	0.810961	0.95	0.805523	0.816261	173.236	15622	0	Pearson correlation	15624
C1	C4	0.946431	0.95	0.944772	0.948043	366.339	15622	0	Pearson correlation	15624
C1	C5	0.852406	0.95	0.848061	0.856636	203.757	15622	0	Pearson correlation	15624
C1	C6	0.921791	0.95	0.9194	0.924114	297.18	15622	0	Pearson correlation	15624
C2	C3	0.760821	0.95	0.754137	0.767347	146.532	15622	0	Pearson correlation	15624
C2	C4	0.902779	0.95	0.899837	0.905639	262.347	15622	0	Pearson correlation	15624
C2	C5	0.811828	0.95	0.806413	0.817107	173.779	15622	0	Pearson correlation	15624
C2	C6	0.910542	0.95	0.907824	0.913185	275.284	15622	0	Pearson correlation	15624
C3	C4	0.816765	0.95	0.811478	0.821919	176.935	15622	0	Pearson correlation	15624
C3	C5	0.733767	0.95	0.726445	0.740923	134.99	15622	0	Pearson correlation	15624
C3	C6	0.798618	0.95	0.792866	0.804227	165.854	15622	0	Pearson correlation	15624
C4	C5	0.866715	0.95	0.86276	0.870564	217.178	15622	0	Pearson correlation	15624
C4	C6	0.960879	0.95	0.959658	0.962064	433.62	15622	0	Pearson correlation	15624
C5	C6	0.869865	0.95	0.865997	0.873629	220.403	15622	0	Pearson correlation	15624
