# Supplementary material for: Transcriptome Analysis Reveals Candidate Genes Regulating the Skin and Hair Diversity of Xinji Fine-Wool Sheep and Tan Sheep
Source: MDPI journal article supplement (doi:10.3390/agriculture12010015), 2021-12-23
Supplement: s1 [file s1 › Supplementary Table S5.xlsx]

## Sheet: Sheet1
Table S5 | The expression level of each sample sequence is measured by TPM value.
category		12-month-old Xinji fine wool sheep (n=3)			3-month-old Xinji fine wool sheep (n=4)				12-month-old Tan sheep (n=6)
gene_id	Name	X1	X2	X3	S1	S2	S3	S4	C1	C2	C3	C4	C5	C6
gene1	RTP5	0	0.0512742	0.145227	0	0	0	0	0	0	0	0	0	0
gene10	BOK	53.7235	63.1766	34.4527	53.6406	23.1502	45.5232	25.4225	36.5677	22.5665	34.804	36.8814	16.3036	32.4162
gene100	UGT1A4	0	0	0	0	0	0	0	0	0	0	0	0	0
gene10000	CD74	195.606	285.187	405.764	151.81	189.261	65.8933	88.5706	123.432	180.455	202.917	249.129	98.5486	126.43
gene10001	RPS14	3204.38	2233.84	2373.58	3065.68	2832.88	2879.57	2642.6	2958.25	2628.32	8170.74	2471.72	2108.33	1910.62
gene10003	NDST1	28.5876	57.4891	41.3595	68.0685	39.2602	64.4112	28.7689	52.5663	34.2255	6.59283	52.1869	29.3527	68.7953
gene10004	SYNPO	11.7815	25.6442	23.2102	17.387	9.96336	16.3701	7.83414	9.6751	11.6499	3.20641	15.6578	9.38451	18.1867
gene10005	MYOZ3	21.3684	26.1618	25.8919	16.9492	14.889	12.8903	9.95053	12.8044	20.4035	25.3112	15.466	10.2388	18.015
gene10006	RBM22	30.5085	45.864	42.833	35.5366	27.0881	25.0602	26.1856	28.0809	24.1526	16.1936	23.5298	16.7128	24.4935
gene10007	DCTN4	35.4421	62.1055	63.2438	72.6979	51.8433	61.6753	55.8836	71.104	52.2785	23.5744	72.8652	54.4849	89.7029
gene10008	SMIM3	14.0763	18.275	11.8682	15.6148	14.4151	13.4804	12.6457	15.9119	20.0049	14.2235	18.8698	10.7875	25.6562
gene1001	IGSF3	4.45355	10.5859	6.50334	18.2666	10.1045	16.2164	10.0245	13.2681	10.302	1.29048	15.0682	14.4766	19.6779
gene10011	ZNF300	0.908553	2.08397	0.831345	3.29031	2.79384	2.66516	3.07812	1.00359	1.96733	0.889222	0.662288	1.86153	2.10985
gene10013	GPX3	91.9739	99.5201	102.442	54.2513	44.4305	27.7563	30.7805	141.638	402.491	748.932	203.196	83.0599	261.158
gene10014	TNIP1	55.3672	57.1548	62.0266	41.1272	32.905	28.9677	25.4113	48.235	38.0313	58.6235	64.9268	32.6996	58.636
gene10016	ANXA6	28.4682	53.2851	41.9077	31.9809	26	16.2636	13.0707	27.6925	28.499	43.463	27.3382	14.9496	28.9294
gene10017	CCDC69	0.635984	2.027	0.795317	0.694348	0.753933	0.775233	0.416706	1.24066	1.28832	2.11194	2.80494	1.95252	2.06429
gene10018	GM2A	0.339375	0.449517	0.742696	1.9761	0.410203	1.0725	0.543554	1.28082	0.637659	0.168127	0.516534	0.322136	1.22394
gene10019	SLC36A3	1.34649	1.35374	1.29837	4.17993	3.62004	4.14831	2.45185	1.76728	3.4063	1.20553	3.23233	2.70248	6.41237
gene1002	CD2	1.66699	4.1651	4.54826	3.69509	2.1558	5.66491	0.893647	3.94173	2.66945	1.82997	5.66149	5.66397	2.45943
gene10020	SLC36A2	20.8639	21.1946	22.0372	26.9578	15.0444	24.1383	11.5991	14.183	7.0466	0.410026	12.7689	17.8237	10.497
gene10022	SLC36A1	10.8728	24.3026	15.8063	46.335	23.7769	51.4822	18.4275	32.8388	39.6455	5.25177	40.845	33.1676	48.5059
gene10024	FAT2	7.46539	9.64624	8.14016	12.5002	7.84577	11.1872	6.51819	12.3571	5.78999	4.38564	13.1996	8.85671	10.8614
gene10026	SPARC	2118.1	2641.98	5076.43	2473.46	3153.98	994.004	1265.95	1845.89	3217.96	2007.32	1578.3	1083.45	1510.59
gene10027	ATOX1	448.092	279.527	318.737	536.141	607.732	699.997	509.892	673.933	591.54	1078.52	575.01	845.544	548.941
gene10028	G3BP1	41.3887	52.9215	40.9706	76.1168	64.284	81.254	81.0152	61.871	51.9147	40.5768	51.5748	46.1225	62.5443
gene10029	GLRA1	0.103831	0.103147	0.0649221	0.151147	0.405466	0.365633	0.113386	0.667231	0.438956	0.0771576	0.3448	0.850056	1.01105
gene1003	PTGFRN	17.3267	36.811	33.9206	25.859	17.868	14.9151	11.0525	17.1552	16.8598	8.82872	18.0843	11.6974	19.4975
gene10030	LOC105615377	119.803	117.938	140.115	56.8626	75.9929	28.7375	56.9021	32.685	70.4287	73.4733	54.8224	42.5155	50.4943
gene10031	LOC101107700	0.0656614	0.173943	0	0.143374	0.25641	0.177862	0	0.120556	0.0462648	0	0	0	0
gene10032	NMUR2	0.766041	1.34196	0.67984	0.719432	4.35617	1.55293	0.151116	1.54258	0.626806	0.12854	2.91311	0.492571	0.926841
gene10035	GRIA1	2.29325	4.07815	1.61976	8.7166	8.45773	12.6884	6.48332	5.48401	6.37351	2.00393	3.17306	4.12678	9.31201
gene10037	FAM114A2	18.221	26.1436	20.8161	41.9235	29.7242	40.8127	32.431	31.5144	29.7052	13.6846	32.7077	23.4513	39.2457
gene10038	MFAP3	5.08392	14.9788	17.0259	20.1802	10.9018	14.3489	11.1143	9.59223	5.55664	1.10572	8.81183	6.46169	10.84
gene10039	GALNT10	6.58161	13.7053	14.086	16.4447	12.6041	18.2361	10.8417	24.2883	15.4118	2.36025	23.5957	16.0844	16.4855
gene1004	CD101	0.439195	1.16347	0.400786	3.59409	1.94684	3.38255	1.18218	3.25455	1.20437	0.493962	1.24166	1.31826	2.73979
gene10041	HAND1	0	0	0	0	0	0	0	0.182713	0.210355	0	0	0.53134	0.430679
gene10043	LARP1	21.2006	37.7544	32.0656	19.2378	12.8731	15.3011	11.13	16.0883	15.4878	3.69355	16.3268	11.599	19.9836
gene10045	FAXDC2	0.294544	0.624219	0.0982229	1.08621	0.766804	1.31912	0.600411	0.408598	0.581097	0.364795	1.17373	1.25812	2.12453
gene10046	CNOT8	22.7603	31.0995	30.3782	40.9599	29.9987	39.1596	29.5799	35.9336	28.6372	11.8486	39.7634	23.637	39.3283
gene10047	GEMIN5	6.89273	9.29854	7.37111	8.13209	7.4771	8.04372	6.80099	7.22785	9.71319	3.59883	8.04117	7.69688	8.76364
gene10048	MRPL22	60.2941	83.4998	52.8865	159.371	166.205	187.987	165.753	171.58	174.576	69.2026	187.354	180.905	192.535
gene1005	TTF2	9.07874	14.8296	11.3956	15.4596	9.9026	12.2594	9.8994	12.8748	11.2184	6.05419	12.5993	10.1289	12.0951
gene10051	SGCD	2.6797	3.2783	1.33562	9.2912	14.4495	13.5126	12.465	13.9419	11.5359	0.641586	16.077	15.5164	14.5494
gene10054	LOC105611754	1.22053	1.36139	1.12465	2.80534	5.66212	5.08101	4.15287	3.45967	4.52621	1.28887	8.31949	5.85363	6.9502
gene10055	LOC101111190	0	0	0	0	0	0	0	0	0	0	0	0.114358	0
gene10056	TIMD4	1.43622	3.19938	3.22469	3.99132	3.8968	1.87446	1.05509	3.91545	8.23363	8.44105	7.3166	2.64907	8.00494
gene10058	HAVCR1	0	0	0	0.0523771	0.100362	0	0	0.0440413	0	0.0534752	0	0.0512298	0.0259528
gene10059	LOC101113331	0	0	1.67092	0	0	0	0	0.0281982	0.616818	0	0.306007	0	0
gene1006	TRIM45	3.58047	7.62645	5.53635	5.81075	6.99094	9.98703	5.28372	11.5783	5.59104	6.59773	13.0548	4.30565	11.0632
gene10060	LOC106990259	0	0	0.179049	0	0	0	0	0	0.252208	0	0.118866	0	0
gene10062	HAVCR2	0.115772	0.494114	0.836488	1.23588	0.516681	0.738706	0.730462	0.614066	0.888238	0.172062	0.811623	1.02565	1.44743
gene10063	MED7	11.6242	15.1223	12.9815	22.5708	18.6238	20.454	20.7382	19.0017	14.6551	11.06	21.7406	15.7191	20.3836
gene10064	FAM71B	0	0	0	0	0	0	0	0	0	0	0	0	0
gene10065	ITK	1.78134	3.47312	4.18791	4.02445	2.67117	2.33155	3.27426	1.9013	1.6668	1.20723	2.01123	2.75947	2.28192
gene10066	CYFIP2	34.1763	39.0286	49.649	28.8348	23.9324	25.0667	17.8392	30.8522	21.9408	9.62438	24.2483	18.0739	28.343
gene10067	FNDC9	0	0	0	0	0	0	0	0	0	0	0	0	0
gene10068	NIPAL4	18.445	24.6393	25.407	18.1606	9.62521	12.6664	12.0768	21.199	7.04696	3.46312	21.475	16.1226	20.792
gene10069	ADAM19	1.35522	4.04599	2.94114	5.60522	2.98411	4.1488	2.64352	4.69559	3.57703	0.724665	4.9766	3.69579	6.38227
gene1007	VTCN1	7.8192	13.4968	13.9372	21.5286	12.1584	25.506	11.6941	9.48423	7.11317	2.61165	7.55865	9.06762	11.1438
gene10070	SOX30	0.0803187	0.0265964	0.0251102	0.0584596	0	0.0652696	0.157878	0	0.0565923	0.0447639	0.10002	0.0571791	0.115867
gene10071	THG1L	9.85344	12.0531	10.2974	18.0412	10.7134	17.4511	13.339	15.2725	9.20449	9.87348	14.831	8.18712	16.2278
gene10072	LSM11	1.81891	3.47999	3.57816	3.74713	3.19244	4.04533	3.24311	4.16631	3.04285	1.1066	4.48596	2.58977	3.91287
gene10073	CLINT1	32.5536	54.3559	66.9213	57.8069	46.4648	46.276	52.2314	48.2687	39.293	14.6109	55.4049	49.478	49.1739
gene10076	EBF1	44.407	112.346	34.6255	183.317	269.59	291.503	159.466	409.443	494.896	39.6145	507.865	388.195	605.419
gene10078	RNF145	36.634	77.1737	61.8697	74.819	55.5834	83.9996	67.3227	58.0576	62.1719	23.8934	52.532	52.6486	61.1687
gene1008	MAN1A2	17.9691	22.9735	24.4289	35.8293	34.7207	37.5155	34.8903	33.8805	35.8623	4.90713	31.2634	33.9009	37.8941
gene10081	UBLCP1	40.352	46.7298	38.2689	83.8032	82.9067	106.068	102.384	73.846	78.426	27.0961	77.8077	108.688	118.293
gene10082	IL12B	0	0	0	0.187023	0.501706	0	0	0.157258	0.181049	0	0	0	0
gene10084	ADRA1B	0.965327	2.60133	0.749278	4.1672	2.0798	2.95749	2.79171	4.03366	3.89337	0.272094	3.31616	4.07592	6.29057
gene10086	TTC1	63.224	62.5512	65.9796	84.7455	76.5818	84.472	65.6545	93.5824	75.3262	60.8679	93.0792	73.9046	97.4314
gene10087	PWWP2A	12.0442	26.6878	16.7507	31.6476	28.9571	36.2925	29.4448	22.3595	26.0367	4.89924	28.0345	28.9625	26.9552
gene10088	FABP6	0	0	0	0	0	0	0.0992338	0	0.480208	1.26613	0	0	0.163862
gene10089	CCNJL	0.77785	2.26163	0.901549	2.01606	2.30726	1.80895	1.20992	1.32365	1.81799	0.479337	1.54353	1.32361	2.18949
gene10090	C1QTNF2	4.8156	7.88669	8.60292	3.93667	6.14044	3.9583	3.27441	3.01978	5.71638	5.05925	5.47491	2.97227	3.07991
gene10092	ZBED8	4.68411	6.91203	7.41667	8.3742	8.00817	7.15942	7.73302	4.25102	5.4212	3.22932	5.8848	5.70564	9.30082
gene10093	SLU7	45.4425	44.2662	47.1982	73.19	80.5734	95.7231	97.6906	71.3302	93.4288	3.15199	78.9956	84.5501	110.609
gene10094	PTTG1	19.4558	22.4721	19.3337	34.5592	37.6648	47.4313	39.1031	23.1055	31.2521	64.7154	24.3242	29.8448	30.4056
gene10096	ATP10B	3.93751	6.50793	3.82143	15.8622	10.0566	20.5619	14.5447	29.148	9.42076	0.597919	18.4479	20.9869	13.3485
gene10097	GABRB2	1.26678	1.90934	1.9119	2.47992	2.04696	3.69174	2.44233	2.35258	4.92452	1.65548	3.7715	6.84143	3.96996
gene10099	GABRA6	0	0	0	0	0	0	0.112728	0	0.0727347	0	0	0.0367444	0
gene101	UGT1A1	0	0	0	0	0	0	0	0	0	0	0	0	0
gene1010	FAM46C	7.8928	7.78953	10.9622	9.46193	7.65917	7.35418	5.86196	9.49856	7.99136	3.58153	10.5354	7.63352	10.8917
gene10101	GABRA1	0.126152	0.0238706	0.54088	0.236107	0.22118	0.839648	0.251905	0.617649	1.72693	0.013392	0.418921	0.359232	0.311974
gene10102	GABRG2	0.0482285	0	0	0.023402	0.161429	0.0696748	0.266844	0.137743	0.226544	0.51369	0.213541	0.228894	0.139148
gene10107	CCNG1	185.9	196.139	236.176	299.756	423.348	356.111	436.217	226.103	249.736	55.2322	287.714	415.017	360.594
gene10108	NUDCD2	24.4608	26.7836	27.2679	31.1989	34.0495	31.4004	28.981	28.2296	25.3437	31.299	33.033	25.9382	30.9852
gene10109	HMMR	6.47595	10.5463	9.07194	16.098	15.3589	18.2896	22.0581	8.90127	10.2978	2.74801	7.93221	11.6894	10.21
gene10110	MAT2B	45.2441	53.2988	62.3068	71.5858	67.7305	64.516	63.0661	61.9978	55.5715	25.6683	70.3369	56.7522	66.171
gene10115	LOC106990422	0.509505	0.674863	0.145634	5.46726	3.31335	3.84861	2.22557	1.60365	2.3386	0.62742	3.2147	1.67887	4.22103
gene10116	LOC101120408	31.4778	54.586	23.791	98.3634	71.2784	110.408	65.0824	77.3349	84.0539	6.14193	69.282	65.976	76.041
gene10119	WWC1	29.6653	37.4682	30.0716	43.0793	24.7738	38.0361	23.2432	36.5955	23.5243	4.0951	40.0462	23.8701	36.0838
gene1012	GDAP2	3.92591	6.15234	5.87953	10.6587	6.887	10.3423	8.13635	8.3139	6.96545	2.37255	8.35626	7.79869	10.7196
gene10120	RARS	57.6847	61.1474	57.1243	125.811	107.246	144.777	135.639	97.028	107.327	89.376	98.1931	106.491	107.32
gene10124	ZFYVE16	8.2355	16.9881	16.8125	25.6198	24.9257	28.2192	33.2124	18.9839	22.0562	5.37427	21.587	22.8444	28.718
gene10125	FAM151B	434.885	295.538	340.878	594.857	744.467	837.488	919.596	778.767	790.453	1488.86	534.586	896.949	520.216
gene10127	ANKRD34B	0.0319133	0.0211353	0.0199543	0	0.0534098	0.0172892	0.12546	0.0976563	0.0899441	0	0.0264942	0.0681576	0.0460377
gene10128	DHFR	26.9308	34.6172	34.7111	37.5102	40.5299	41.8797	48.017	21.2392	35.7082	13.9632	34.5021	38.8672	39.6447
gene10129	MSH3	10.3896	17.1668	13.3708	22.1688	19.9105	25.677	22.1431	23.3609	22.6328	6.844	19.0838	19.8745	22.6455
gene1013	WDR3	6.16273	15.6644	13.3683	25.0337	10.5251	19.5472	16.8434	14.8969	10.3826	0.921027	12.4047	6.17648	12.9381
gene10132	RASGRF2	1.06497	2.38508	1.44759	2.92081	2.3994	2.97675	1.82481	2.55672	2.97251	0.638462	1.96474	2.65172	3.36209
gene10134	CKMT2	0.791099	2.15084	0.728952	5.15188	2.60149	7.89493	4.11033	3.36363	4.69394	1.17574	3.04185	2.54915	8.34898
gene10135	ZCCHC9	15.7754	18.9614	16.2541	27.8887	24.2759	30.8674	25.9768	23.1015	21.8793	7.75344	23.296	19.8753	30.0007
gene10137	ACOT12	2.82057	5.46224	2.21362	7.53216	4.38406	8.00912	6.21972	8.54772	9.10074	1.1564	8.46209	5.78849	10.523
gene10139	SSBP2	95.5032	141.248	64.2465	319.149	403.184	448.599	410.637	398.145	357.681	34.671	404.828	402.291	386.196
gene1014	SPAG17	31.4144	18.0139	21.6201	26.9569	38.8722	37.1091	48.1238	21.4949	37.8013	70.6534	24.2489	40.1844	26.0778
gene10140	LOC105606746	0.280708	0.37181	0	0.919405	1.25277	1.67282	0.919618	0.687183	0.395572	0.625786	0.699123	0.799347	1.51854
gene10141	ATG10	8.28994	14.0012	8.03541	23.7136	28.5961	30.6141	27.0082	25.6335	23.8999	4.78835	27.4989	28.8639	29.3229
gene10146	RPS23	120.663	44.9241	63.7703	121.049	203.187	261.48	241.503	1050.76	201.864	137.997	143.635	354.169	203.194
gene10147	ATP6AP1L	0.155877	0.344111	0.178685	0.548364	0.681172	0.745951	0.351791	0.588289	0.658983	0.579165	0.301952	0.462373	1.12433
gene10149	TMEM167A	92.1358	81.0254	90.3379	119.873	111.492	137.275	103.574	118.007	138.402	94.87	105.053	112.602	143.065
gene10151	XRCC4	14.9773	28.9345	14.2984	41.9029	68.024	58.5792	61.9754	64.4318	70.0612	6.3792	81.1545	82.8543	110.032
gene10153	VCAN	15.8933	51.6295	28.4958	38.6233	29.8144	31.7882	23.4531	24.4665	46.7754	25.8193	26.8487	32.7451	41.0298
gene10155	HAPLN1	3.14529	2.87122	3.66751	5.75415	7.58763	4.37508	6.42387	1.61279	2.45575	0.536942	2.04661	1.81552	2.32999
gene10156	EDIL3	24.2301	32.3762	38.0963	51.9281	68.9006	37.1504	35.4466	28.2559	49.4059	10.5915	26.0983	38.5007	40.2
gene10165	RASA1	40.2151	67.1553	51.8628	92.0462	102.062	109.344	108.045	80.5871	75.0344	13.6021	96.913	92.5541	116.049
gene10166	CCNH	38.981	53.2574	53.5862	102.497	81.5609	104.517	108.76	73.5342	82.0652	44.9585	101.081	98.8409	105.727
gene1017	TBX15	16.5324	35.6433	22.2852	46.7257	53.7598	48.2333	29.902	29.9597	34.114	6.40856	38.6202	26.494	31.4378
gene10170	LOC106991202	0	0	0	0	0	0	0	0	0	0	0	0	0
gene10172	TMEM161B	13.3878	29.446	12.2568	50.1336	39.4119	60.525	48.6502	37.5244	31.9856	14.7859	32.8334	35.8148	40.6459
gene10175	MEF2C	40.732	80.6403	55.2263	94.394	157.183	132.942	99.304	119.362	166.143	13.117	141.068	167.961	162.681
gene1018	WARS2	8.67866	12.4664	11.5453	16.2928	15.1923	15.4994	14.4839	13.2969	14.0644	4.29202	18.1366	15.8081	16.9232
gene10180	LOC106991203	0.101379	0.335704	0	0.590309	0.113112	0.38446	0.177134	0.12409	0.285726	0	0.504986	0.721723	0.804367
gene10182	LOC105615382	0	0	0	0	0	0.0520411	0	0	0	0	0	0	0
gene10183	CETN3	31.8663	38.568	30.0653	60.192	63.732	76.057	83.452	44.1571	59.2463	21.1961	41.1113	71.177	63.9006
gene10185	POLR3G	9.19158	14.1852	9.89497	33.4298	19.115	32.6947	37.4853	14.1235	19.9242	5.36816	9.45095	18.4499	16.2198
gene10186	LYSMD3	8.46673	14.4404	16.4641	20.3331	19.2128	23.7184	25.2439	13.4497	16.4332	8.83602	15.7707	22.4986	24.8207
gene10187	ADGRV1	1.53716	1.38954	1.2683	2.61134	2.18889	6.18134	2.51411	2.45566	2.92542	0.379186	2.02603	2.48193	2.08946
gene10189	ARRDC3	50.1944	75.6128	94.2941	108.353	123.39	117.274	114.39	110.626	97.2823	17.7908	118.808	98.2698	138.644
gene1019	HAO2	0	0	0	0.0359716	0.0275707	0	0.0431759	0.120987	0.0696451	0.110177	0.0820593	0.105551	0
gene10192	LOC101121262	0	0	0	0	0	0	0	0	0	0	0	0	0
gene10194	NR2F1	6.84717	10.5221	8.71085	6.86066	9.06164	6.71241	4.14325	10.05	18.1284	5.39653	20.0802	7.17461	16.8903
gene10195	FAM172A	63.4859	56.5738	47.6533	106.607	124.924	187.135	206.434	223.136	152.281	173.558	139.8	189.051	137.547
gene10197	KIAA0825	31.313	44.9893	20.971	88.7506	97.2519	123.752	114.72	99.2692	95.8623	10.4199	95.0949	126.534	122.326
gene102	MROH2A	0	0	0	0	0	0	0	0	0	0	0	0	0
gene1020	HSD3B1	0.665743	0.734839	0.416265	1.04988	0.371393	0.901674	0.775474	0.475348	1.48542	0	2.11866	0.552935	1.28052
gene10200	SLF1	9.14419	12.222	9.21043	17.5223	20.4233	22.86	21.3947	22.2428	23.0541	2.24856	20.9799	22.441	31.5391
gene10201	MCTP1	9.47994	15.1049	6.13667	28.9798	29.0557	32.7181	30.789	31.7222	46.7764	3.87452	73.6554	43.7481	62.2845
gene10207	FAM81B	0.0403415	0	0.151345	0.0880873	0.22505	0.0655657	0.0528646	0.123447	0.142123	0	0.0669823	0.229754	0.116392
gene10208	TTC37	7.20942	16.2218	17.9816	26.3739	20.2255	23.7031	22.7501	21.0476	18.3905	1.54015	17.6839	16.4774	20.6431
gene10209	ARSK	3.44718	6.02555	4.69947	5.67613	7.47153	7.95995	3.80142	11.3094	7.84405	4.15737	13.2769	15.4485	18.7501
gene1021	ZNF697	0.478593	2.29795	1.64586	1.56754	1.2682	0.90748	0.496503	0.842096	0.67443	0.266733	1.19197	0.851779	0.776713
gene10211	GPR150	0.0185452	0.012282	0.034787	0.0404942	0.0517284	0.0602818	0.0243021	0.0226997	0	0	0.138565	0.0396071	0.0535061
gene10213	RFESD	9.22937	7.87815	6.60436	12.017	13.6155	16.7224	13.6174	13.1797	14.7401	15.5838	15.2391	11.7537	15.2373
gene10214	SPATA9	8.59149	22.2672	7.85131	37.3994	40.0481	50.3937	39.4409	30.5878	34.9824	8.96268	40.6008	35.8157	43.6172
gene10215	RHOBTB3	22.1634	49.8269	40.4218	71.4964	48.3852	65.6456	48.3719	60.1653	60.9656	20.3461	63.7962	47.9812	108.048
gene10216	GLRX	487.15	148.408	345.211	356.146	715.642	433.409	783.073	267.001	128.145	177.784	496.997	1086.65	302.185
gene10217	ELL2	37.9515	65.6068	65.0641	136.698	95.3271	159.739	90.1706	168.185	172.145	16.5596	127.482	178.687	166.21
gene10219	LOC105607634	0.131069	0.0868036	0.163906	0.938083	0.51183	0.343203	0.438934	0.762048	1.04664	0.178563	0.344573	0.901983	0.803584
gene1022	PHGDH	103.89	108.013	108.951	80.0173	94.338	51.2804	78.4541	87.6711	92.2085	125.798	62.1686	72.7994	68.5881
gene10222	PCSK1	0.0422371	0.265739	0.118842	0.353535	0.0706875	0.20594	0.267519	0.142172	0.520803	0.0156933	0.736362	0.420962	1.03582
gene10224	CAST	199.676	245.201	260.943	212.646	170.011	232.491	190.125	201.578	189.835	43.4791	235.735	185.627	253.406
gene10225	ERAP1	13.8919	16.2072	13.7866	13.8321	16.5411	16.8101	13.7188	11.1682	11.5736	13.6348	16.1277	14.3836	16.0162
gene10226	ERAP2	2.29186	6.45992	6.48871	8.2472	4.1118	5.68169	4.93345	5.27393	4.15982	0.25887	5.47973	4.93391	5.21058
gene10227	LNPEP	18.924	30.3687	30.7099	46.2099	28.1805	41.1155	30.0545	30.6881	24.4941	5.44619	35.5168	25.192	34.1245
gene10229	LOC101110759	0.0204827	0.244173	0.0768427	0.178899	0.0457062	0.0887729	0.0894704	0.350997	0.0577282	0	0.408109	0.17498	0.0590962
gene1023	HMGCS2	0.995228	0.719031	0.678851	1.14144	0.740267	0.882278	1.37004	1.43966	0.42499	0.425806	1.40209	0.944674	1.34869
gene10230	LIX1	4.58184	3.58117	4.25858	6.66975	7.64508	4.8303	5.28295	4.1683	1.59963	0.812854	2.74148	5.52453	3.15598
gene10231	RIOK2	22.8906	30.3197	23.132	63.4679	45.2779	67.3481	56.8341	53.0377	53.9447	42.6364	55.2245	40.3781	68.5869
gene10234	RGMB	7.99663	15.6853	6.14755	55.8178	24.1578	38.8479	26.856	34.4987	7.78963	2.02948	35.2977	19.536	18.1863
gene10235	RGMB	69.2256	86.0391	78.1338	112.925	79.9828	93.6739	72.9967	70.8527	48.5786	21.2412	105.19	57.2664	71.3924
gene10236	CHD1	19.5241	27.4533	21.9309	42.4576	47.917	52.6921	48.3313	42.2006	41.0698	4.98415	36.4727	37.8374	61.3298
gene1024	REG4	0.0744581	0	0	0	0	0.0806761	0.195144	0.182276	0.314778	0	0.370887	0.106014	0.322237
gene10242	FAM174A	20.0042	23.3958	19.8263	34.0765	28.6112	39.6601	37.4618	16.4105	25.7906	9.88376	29.6811	32.118	31.6207
gene10244	ST8SIA4	4.69489	8.20133	9.17536	16.3429	16.8407	17.2023	17.7535	11.8819	11.7618	2.1826	14.1031	16.9376	14.2654
gene10247	SLCO4C1	0.30519	0.963951	0.689903	2.64849	0.772691	1.79328	1.39462	0.818954	1.09172	0.0174452	1.85152	0.384393	1.32079
gene10248	SLCO6A1	0.0779386	0	0	0.113455	0.028986	0.0844473	0.136177	0.190797	0.146441	0.212361	0.0862719	0.369898	0.262344
gene1025	LOC101112189	0	0	0	0	0	0	0	0	0	0	0	0	0
gene10251	PAM	31.0664	56.0812	61.5488	48.0067	51.4431	44.6079	37.7245	76.4185	85.506	19.2044	89.9666	59.4305	128.396
gene10252	LOC105609307	0	0	0	0	0	0	0	0	0	0	0	0	0
gene10254	GIN1	4.90774	8.23183	5.89055	13.2831	11.4742	14.1624	12.5178	11.2597	14.5965	4.19676	20.597	14.0105	15.1914
gene10255	PPIP5K2	22.2762	42.079	30.0303	70.5658	62.9579	71.739	63.708	52.019	50.7421	9.92039	45.5779	54.1363	55.5341
gene10256	C5H5orf30	6.71336	9.92049	9.5089	14.5592	14.6493	13.113	14.5027	13.7513	10.2971	3.30885	17.0992	14.3703	17.9857
gene10258	NUDT12	8.33255	10.803	14.2172	19.1453	19.5194	20.4095	26.8045	13.0947	9.77685	3.06974	17.294	14.7042	14.3634
gene1026	LOC101112445	0	0	0	0	0	0	0	0	0	0	0	0	0
gene10266	EFNA5	158.784	293.605	88.7598	1205.36	827.551	1335.08	610.472	1038.72	671.591	17.0771	1056.97	845.698	925.114
gene10267	FBXL17	45.4345	71.1888	56.0202	105.119	121.262	137.77	117.265	119.407	122.339	14.0753	131.697	138.202	155.301
gene10268	FER	19.5324	35.2616	23.1368	75.837	63.1251	81.4859	62.0437	86.3494	79.1359	6.9173	90.9715	83.8502	98.5062
gene10269	PJA2	43.3043	68.8518	69.1374	83.1153	71.5484	79.3779	71.6838	72.1889	71.0796	13.1565	80.9184	75.109	99.4333
gene1027	LOC101112695	0	0	0	0.0353679	0	0	0	0.0892171	0	0	0	0.0345931	0
gene10271	MAN2A1	14.794	30.7189	25.3532	41.6388	30.4568	33.5939	28.1979	37.1612	34.6784	5.45894	34.4653	25.1945	53.2318
gene10273	TMEM232	1.84177	2.10985	2.52106	9.45616	4.05429	10.76	5.74024	4.90477	5.3662	1.38713	10.2073	12.899	7.28857
gene10275	SLC25A46	11.6107	28.9716	25.6134	41.6866	21.7003	31.4851	25.2571	23.0844	17.5198	5.52755	21.6924	20.9118	26.7505
gene10277	WDR36	7.01777	16.6821	12.6824	29.6384	16.4943	24.8376	18.7865	22.5787	16.4462	5.09233	17.1678	15.2698	22.9133
gene10278	LOC106991207	0.0443607	0.105764	0.0221897	0.180812	0.0890899	0.211487	0.147267	0.217193	0.300062	0.0131859	0.117849	0.202115	0.21758
gene1028	NOTCH2	23.0972	50.7778	37.7502	46.8759	37.5156	49.6329	34.9327	43.5111	37.3116	6.5923	36.3472	36.4913	51.0016
gene10280	CAMK4	5.54836	6.43713	9.87581	11.2013	6.23563	16.8065	13.197	19.3825	12.898	10.2022	20.3749	14.9346	19.1044
gene10281	STARD4	11.1876	17.4829	20.9244	25.9069	19.9731	23.8546	22.811	17.8427	14.5875	3.96993	18.9769	20.597	21.0854
gene10285	APELA	0.96757	0.598075	0.32266	0.751191	1.58333	2.02685	1.52152	0.710594	0.181799	0	0.321307	0.826578	0.837481
gene10291	44256	0.640423	1.73826	2.04812	3.6679	3.97094	3.54915	2.935	2.78859	3.31402	0.904992	5.19471	5.47102	4.42243
gene10292	TMA16	25.4647	20.6122	15.0264	30.4214	26.5335	34.2659	29.568	28.254	29.7272	68.7985	31.9338	23.6102	29.1917
gene10293	TKTL2	0	0	0	0.0314517	0.0241064	0	0	0.185123	0	0	0.107623	0.123051	0.0623371
gene10294	NPY5R	0.986091	1.71428	2.35066	1.61488	3.78196	2.6711	3.25742	1.58418	2.08439	0.045798	3.42807	2.06213	2.17823
gene10295	LOC101107098	0.483284	0.384079	0.60436	0.422108	1.40195	1.88512	146.843	0.946477	2.17933	37.4214	0.802436	3.44051	1.53379
gene10296	NPY1R	0.904981	2.34526	3.17369	3.55118	5.26805	4.6683	4.86396	4.5031	3.54864	0.511682	3.6912	2.32493	4.00168
gene10297	NAF1	19.1013	32.9392	21.3301	52.3243	32.0698	50.2533	37.5329	43.3245	29.5403	12.6297	39.5683	28.6302	62.7256
gene10298	BBS7	2.95174	5.4736	4.23406	5.88918	6.64478	7.22426	6.71977	4.88815	3.91489	2.25796	3.83432	4.52409	5.43539
gene10299	CCNA2	14.8821	25.2804	17.7343	26.1107	15.2285	22.0769	18.4368	14.168	12.3224	8.64306	9.26042	6.74384	10.6333
gene103	LOC105610609	0	0	0	0	0	0	0	0	0	0	0	0	0
gene1030	SEC22B	27.0639	34.3239	36.0229	53.0871	50.0874	49.0994	53.2866	44.2034	43.3108	24.385	51.9015	56.2833	58.685
gene10300	EXOSC9	31.9996	41.9981	27.1298	70.753	58.6512	79.3792	67.9022	71.6465	65.7885	32.2118	69.8261	60.7681	99.6068
gene10303	TMEM155	0.105103	0.243623	0	0.458991	0.0586328	0.341639	0	0.0964855	0.111082	0	0.0872552	0.224468	0.227429
gene10304	ANXA5	84.6855	152.225	172.847	112.416	107.448	66.1494	71.6942	83.7896	114.844	43.209	126.332	78.8972	195.614
gene10307	QRFPR	0.784982	1.71417	1.19389	2.68687	3.69267	1.77004	1.57543	2.15538	5.94952	0.599089	2.53629	2.50719	2.01996
gene10308	TNIP3	2.67594	2.05377	2.53321	2.03869	2.12063	2.0594	1.55122	2.51012	1.90308	3.62391	2.65755	1.8516	2.05641
gene10309	NDNF	2.10851	6.70884	3.98379	3.36961	4.34705	3.60072	3.52389	2.77723	5.10289	0.54499	5.82221	3.65475	3.60377
gene1031	LOC101112864	4.81732	9.65824	9.40638	7.81431	7.08997	6.5646	6.26247	9.76039	6.88121	5.03978	9.33623	6.57801	9.49909
gene10310	PRDM5	12.6888	30.522	9.05657	44.6963	46.011	64.5269	42.4583	61.063	60.9387	4.78127	47.9999	45.0381	62.5986
gene10312	MAD2L1	22.9269	22.128	23.5824	37.703	34.136	43.1124	38.1789	26.4826	24.5346	14.7694	26.1145	24.399	25.9626
gene10313	PDE5A	6.74796	12.5132	9.62287	18.0949	23.9339	23.2941	14.3138	29.0391	41.6402	6.28125	36.679	29.4639	57.3482
gene10314	FABP2	0.0747263	0.0989783	0	0	0	0.161933	0.261129	0.274399	0.105304	0	0.124074	0.106396	0.215598
gene10315	C6H4orf3	188.792	184.152	203.414	302.085	266.758	355.295	405.124	228.028	336.797	442.282	244.91	415.077	333.457
gene10317	USP53	7.88444	15.4879	12.5168	33.8289	28.1202	32.2023	24.2481	41.04	28.4924	1.57894	33.438	33.6397	46.2863
gene10319	MYOZ2	5.89088	6.76237	2.37372	16.3884	13.9485	28.2972	18.6985	15.5427	17.9863	0.924147	24.4528	25.442	37.9582
gene10320	SYNPO2	37.7495	56.3279	59.9401	56.4557	72.7084	66.9098	49.2783	80.7919	71.7866	13.5419	107.506	68.4375	71.4571
gene10323	SEC24D	9.69682	24.2497	20.7382	27.0071	25.3789	23.3544	17.5564	35.1512	34.1842	6.69953	31.1228	26.2639	45.9117
gene10324	METTL14	12.9914	17.5199	15.6015	30.876	25.5879	33.962	33.1865	26.2866	24.5967	10.1794	25.0925	26.2989	29.1956
gene10326	PRSS12	4.99808	10.4973	4.28303	21.0733	11.2196	16.9368	15.813	14.2341	9.96158	4.02484	14.6137	8.22201	15.2821
gene10329	NDST3	1.24361	2.80909	1.59682	6.15828	8.44903	5.89514	4.74347	3.60163	6.6031	0.594084	3.74256	5.47006	4.59715
gene10332	TRAM1L1	0.0248789	0.197719	0.186671	0.36216	0.388612	0.134783	0.0869386	0.152261	0.105177	0.240339	0.123925	0.425072	0.17945
gene10334	LOC101112318	15.1473	16.1704	18.6594	12.5058	10.5941	7.75702	10.2045	19.9241	5.30981	2.856	6.50653	3.32622	6.63147
gene10341	NDST4	0.0229694	0.121696	0.0574477	0.217336	0.499736	0.497751	0.642127	0.899677	0.291314	0.332838	0.553	0.784894	0.364488
gene10342	UGT8	0.47772	0.759315	0.806494	2.43395	2.39852	2.48455	1.75285	1.28642	1.98594	0.106499	2.41925	2.82275	2.13637
gene10347	ARSJ	8.39453	17.7208	16.918	35.2412	44.4885	31.9969	37.7485	26.3298	32.0559	2.28356	26.3207	47.1684	52.494
gene10348	CAMK2D	43.8917	56.8861	40.2562	98.8356	109.442	101.285	87.0731	114.173	102.963	11.0752	151.613	141.183	187.564
gene10351	ANK2	4.93424	11.5246	5.10783	16.1087	29.9768	19.8831	13.3921	19.7427	29.2627	4.71164	21.2945	18.3099	33.9058
gene10354	LARP7	95.1453	70.0404	57.1571	103.983	183.242	162.13	203.518	124.657	193.227	17.5669	137.258	150.057	196.117
gene10356	ZGRF1	1.55843	3.31705	1.66723	4.79944	3.58811	3.89445	3.47844	3.89227	2.83084	1.57311	3.94868	3.10389	4.35338
gene10357	NEUROG2	0.110269	0.43817	0	0	0	0	0.0963332	0	0	0	0	0	0.159073
gene10358	ALPK1	4.19129	7.43571	5.28897	9.3737	12.3002	10.6377	7.15674	12.81	12.4749	2.04806	16.4278	12.7489	17.2228
gene10359	LOC105610290	0	0	0	0	0	0	0	0	0	0	0	0	0
gene1036	LOC101112943	0.0298118	0.039487	0.0932012	0.0216984	0.0997852	0.0807534	0.104176	0.0547352	0.0420105	0.299069	0.0989978	0.0636692	0.0645091
gene10361	TIFA	3.47031	7.02155	4.54475	7.12012	7.68285	7.93473	6.89897	4.08049	4.58228	1.1168	7.44074	6.80853	8.35684
gene10362	AP1AR	15.0934	20.8493	20.4324	33.4211	32.2906	35.3431	34.6826	28.1381	24.8629	4.21238	31.0533	35.8727	39.6707
gene10363	C6H4orf32	10.5589	13.3445	15.9143	20.2703	21.9155	18.0104	20.5235	15.2947	17.2837	5.77344	27.4462	24.2905	28.8347
gene10367	PITX2	0.660796	1.01529	1.05772	1.50059	1.09115	0.916453	0.762014	0.776473	0.446971	0.49104	1.14106	0.376338	1.06765
gene10368	ENPEP	0.454203	1.04932	0.528367	1.89128	1.72065	1.38484	1.68871	0.853323	2.24765	0.612247	1.56092	1.17308	2.89519
gene10371	ELOVL6	35.942	47.3788	53.0319	83.2404	68.7648	81.1767	75.0304	61.2962	50.4933	27.3115	51.2074	51.5944	93.2367
gene10373	EGF	0	0.0149472	0.014112	0.0164272	0.0755444	0.134499	0.147879	0.179566	0.206732	0.142558	0.187371	0.257078	0.325586
gene10374	LRIT3	0.0402719	0	0.0335741	0.0977059	0.0299549	0.043635	0.0703646	0.0821559	0.037834	0.0199508	0	0	0.077461
gene10375	RRH	0.606665	1.26877	0.319432	2.76555	1.88811	3.21744	2.25944	2.55991	1.28236	0.676223	1.6965	1.86393	2.46428
gene10376	GAR1	20.1069	21.9841	17.0268	19.7819	17.4878	17.0114	17.8424	14.9864	15.4687	18.9416	17.6564	12.5484	21.1264
gene10377	CFI	1.64106	1.46159	1.66298	2.84194	8.52347	2.39124	1.48309	12.0521	6.25988	2.69126	12.3085	14.9055	6.24495
gene10378	PLA2G12A	23.2062	33.2064	35.7185	44.6585	31.2124	42.3193	35.119	31.1384	26.5733	10.1072	48.2057	32.5151	33.8645
gene10379	CASP6	73.8302	52.0403	78.1679	110.588	113.694	121.661	137.386	116.043	86.174	51.5679	95.2102	123.989	83.6245
gene1038	PRKAB2	5.45127	8.51643	6.48195	11.157	7.19977	10.8412	7.09261	8.7968	9.97989	7.16691	12.9579	8.09324	14.686
gene10380	LOC105615411	0	0	0	0	0	0	0	0	0	0	0	0	0
gene10382	CCDC109B	61.655	83.2891	57.0063	156.848	123.143	142.359	85.1167	123.19	135.033	94.2089	119.433	94.3474	164.037
gene10383	SEC24B	19.3282	37.824	30.7321	43.9854	35.8631	45.5427	40.8004	39.2752	37.6444	12.8262	38.7022	36.9131	54.6897
gene10385	COL25A1	1.69836	1.22283	0.93667	5.55313	3.41082	6.7851	4.84681	5.21304	6.554	2.71828	3.3116	8.50686	4.15876
gene10388	ETNPPL	7.03122	8.60881	5.72637	12.8156	6.2957	14.8207	8.85257	11.1376	9.4504	8.36428	6.22967	4.37459	5.02895
gene10389	OSTC	113.339	125.013	111.884	196.621	244.721	237.029	262.458	180.68	255.987	156.377	201.717	347.186	197.603
gene1039	FMO5	13.8701	20.2667	24.3755	35.0149	29.7296	35.8747	35.0721	39.1259	17.7903	5.67881	40.19	28.8315	39.459
gene10390	RPL34	31.9717	49.0891	18.2773	115.118	75.7112	126.69	80.8291	134.014	114.567	77.5782	160.989	106.465	141.19
gene10391	LEF1	54.0016	88.6531	53.734	132.03	97.654	221.63	109.876	157.548	161.416	37.1659	74.3016	86.1749	134.918
gene10392	HADH	291.335	185.814	291.577	188.591	213.77	156.048	164.119	209.495	133.132	115.602	288.24	211.101	191.106
gene10393	LOC101120834	15.2839	43.2836	27.7482	41.2982	34.5372	47.5973	34.548	33.9919	30.5297	20.2933	28.4041	17.1388	31.5054
gene10395	SGMS2	7.15434	11.1395	10.1211	14.608	12.8211	16.7498	12.7769	13.3939	19.3607	3.68543	16.6095	14.904	29.1812
gene10397	PAPSS1	45.8699	86.489	68.9807	53.7595	60.6547	56.5645	58.1312	50.5454	45.2312	14.297	53.0209	47.7714	49.3154
gene10398	LOC106991223	0	0	0	0	0	0	0	0	0	0	0	0	0
gene104	LOC105616330	0	0	0	0	0	0	0	0	0	0	0	0	0
gene1040	CHD1L	13.7525	21.7381	11.0931	38.5179	28.3143	44.5587	28.2604	36.4798	44.1133	7.24118	37.1846	38.188	46.5561
gene10400	DKK2	14.8556	24.2749	23.0673	53.1091	50.0469	52.9532	36.63	41.8449	39.7345	2.22555	77.9815	41.8909	43.4991
gene10401	GIMD1	1.91215	1.77045	0.742897	3.13482	3.70762	4.38505	4.29786	1.93149	2.56378	0.758748	3.97633	3.38334	3.91002
gene10402	AIMP1	18.9823	19.5453	16.38	31.7789	41.9412	45.0057	51.504	38.2958	39.4172	14.1579	32.6809	44.0478	38.1956
gene10403	TBCK	8.85276	17.5672	12.1328	28.1277	28.3561	30.7052	29.252	23.3113	27.0911	3.99324	30.103	33.5348	31.2203
gene10405	NPNT	11.2684	20.0986	18.3212	18.4435	28.6267	25.2894	17.0928	17.6354	17.3803	3.01338	30.066	17.4009	28.3597
gene10407	GSTCD	9880.11	18076.2	17223.6	2556.14	1918.1	2206.78	1439.34	2093.41	2104.51	1267.79	1727.96	1569.3	1709.67
gene10408	INTS12	9.17411	13.966	12.2252	20.2737	22.6484	26.155	21.7774	20.1721	21.2348	6.66309	26.812	19.0317	21.1991
gene10409	ARHGEF38	0.410871	1.19728	0.650821	1.77437	3.22422	1.88461	2.02205	2.01165	3.85998	0.437626	3.22909	2.652	2.48941
gene10410	PPA2	65.4806	81.0926	53.7141	101.439	112.263	129.109	103.487	120.851	123.337	38.4866	101.833	132.443	127.115
gene10412	TET2	12.9159	23.0264	18.5523	38.6396	27.2824	43.6435	28.1757	33.6415	28.7348	5.63499	35.482	33.0419	44.8204
gene10413	LOC105612165	4576.94	2709.44	3007.19	5574.75	7895.54	7900.01	11894.6	7316.42	8465.46	5637.47	5876.71	12359.1	6214.55
gene10414	CXXC4	0.626867	0.718779	0.702014	0.939765	1.57629	0.983344	0.874593	0.664227	0.685606	0.139053	0.419442	0.546179	0.445406
gene10415	TACR3	8.54319	9.54012	8.61254	7.61481	7.62548	6.49388	5.35074	4.79414	7.2234	14.6503	7.07065	4.90296	12.7035
gene10418	CENPE	8.40345	10.3073	8.14909	14.7241	18.6458	22.0538	27.6724	10.2502	15.8616	2.70112	8.33047	12.1003	9.80156
gene10419	BDH2	29.2035	36.5399	25.7155	90.9067	70.3525	90.219	59.7651	92.7037	89.854	34.8422	70.3007	77.6211	101.969
gene1042	LOC101113455	0	0	0	0	0	0	0	0	0	0	0	0	0
gene10420	SLC9B2	3.56689	7.44215	6.55259	10.3386	8.69892	10.363	6.42523	8.92506	7.38397	3.94067	11.3731	8.40434	10.3822
gene10422	SLC9B1	5.25873	6.22443	2.61182	16.3417	17.1442	20.5286	12.0881	31.5905	24.9647	0.914589	37.6507	32.9234	51.9734
gene10423	CISD2	57.574	76.201	72.2736	105.436	92.9122	107.616	132.831	56.8198	95.7319	21.228	71.806	105.073	81.5928
gene10425	UBE2D3	81.201	102.199	85.3292	156.435	144.475	173.858	176.846	146.862	156.945	92.0353	146.445	179.968	174.573
gene10426	MANBA	2.73867	5.76902	4.84834	10.8552	9.29566	10.1892	7.09118	23.546	14.2283	3.54307	13.8882	12.3557	18.7066
gene10427	NFKB1	19.8897	33.1252	25.4074	37.152	32.333	42.9823	28.7217	55.9884	43.5922	9.96842	53.8981	51.7675	71.5906
gene1043	LOC101113720	0	0	0	0	0	0	0.14273	0	0	0	0	0	0
gene10430	SLC39A8	113.013	126.787	136.305	232.89	145.79	218.47	208.248	98.0239	96.8452	26.3592	86.7702	100.751	105.544
gene10432	BANK1	1.54122	3.29027	2.78897	5.67483	6.17023	6.03137	6.58961	7.5681	6.23455	1.96719	9.092	9.06154	8.71025
gene10435	PPP3CA	57.1016	63.5613	68.798	79.8111	84.5378	88.6918	84.6537	90.8037	112.035	16.6932	114.606	112.37	104.619
gene10438	EMCN	9.03507	14.9673	13.8872	24.1066	29.8615	29.2368	21.4244	48.1115	60.5378	15.3644	56.2461	37.795	80.1354
gene10440	DDIT4L	2.00933	2.24122	2.90947	2.06287	3.13861	2.45214	2.45754	3.15846	3.54687	1.60316	4.741	1.837	3.44785
gene10442	LOC106990491	0	0.0682524	0	0	0.229969	0.0558321	0.0900333	0.0630724	0.145229	0	0.0855577	0	0
gene10443	H2AFZ	320.334	292.302	273.168	520.443	584.609	714.747	691.548	503.995	546.762	376.595	431.999	689.897	508.257
gene10444	DNAJB14	8.06469	14.7534	14.2638	20.5952	23.4808	24.6363	32.7572	18.6939	19.3185	3.35062	20.1124	32.4653	27.6404
gene10445	LAMTOR3	64.2631	66.7603	62.2943	124.424	128.826	150.455	158.297	113.619	100.858	27.9346	106.422	145.201	131.423
gene10446	DAPP1	8.72554	9.34695	12.9388	25.0564	21.3326	29.3959	21.6396	41.4369	16.1595	3.20656	54.8238	50.2709	36.6615
gene10447	LOC105612764	0.0480718	0.159183	0.142774	0.279911	0.073748	0.266942	0.204732	0.110326	0.0931459	0.0401877	0.049886	0.128334	0.0780162
gene10448	MTTP	0	0.141353	0	0.0443852	0.102058	0.11563	0.133187	0.111964	0.0429674	0.124618	0.0506264	0.043413	0.373878
gene10449	TRMT10A	2.7962	7.74106	4.72531	8.83756	8.01028	11.573	12.3021	5.30349	8.51976	2.22763	5.18651	7.85489	6.57757
gene1045	BCL9	3.26066	5.27554	5.22627	3.96053	3.67711	4.17876	2.16859	2.95256	3.51781	0.953571	4.76193	3.62418	4.22834
gene10451	C6H4orf17	1.90483	4.20505	1.36117	10.5962	6.8059	15.9952	9.41003	8.77103	7.95694	0.808848	9.14935	8.78204	10.2064
gene10452	LOC101111713	0	0	0	0	0	0	0	0	0	0	0	0	0
gene10453	ADH1C	5.28006	8.85138	8.45993	6.72538	8.46845	7.37473	4.25239	89.5716	13.1374	2.6975	35.2046	118.405	28.266
gene10454	LOC101122865	16.5766	27.7241	14.8595	24.2593	15.5798	54.6343	34.2503	18.7362	13.0631	29.2542	14.0681	14.2283	16.2686
gene10455	LOC101112223	82.7648	91.796	98.9089	156.82	167.846	183.242	144.788	131.862	120.77	97.4226	134.915	112.033	162.293
gene10456	METAP1	8.94343	14.2341	13.4498	15.7214	10.3767	11.8469	11.1193	14.2135	11.1566	3.10407	9.91449	7.76476	13.6742
gene10458	LOC101112481	0.0797016	0	0	0.348063	0.222313	0.388609	0.104443	0	0.0561575	0	0	0	0.172465
gene10459	EIF4E	47.2764	67.7834	65.0945	102.265	101.502	113.684	136.048	78.3817	92.4912	23.033	76.7194	104.301	100.122
gene1046	ACP6	45.2374	50.7527	35.1176	47.9308	41.4509	44.8319	31.3744	53.5435	34.0812	50.4513	51.4652	30.96	33.1549
gene10464	TSPAN5	16.8568	33.2736	15.0645	67.69	45.1841	60.5849	44.9875	49.2174	52.26	14.4512	37.8873	38.6355	60.8529
gene10466	RAP1GDS1	20.1082	34.611	22.8057	62.1583	62.5415	65.5651	60.5627	52.6406	52.9808	10.9477	51.6345	60.3607	55.3406
gene10467	LOC101102064	0.0311546	0	0	0.317461	0.06952	0.270051	0.244955	0.343205	0.482932	0.138907	0.310372	0.310507	0.449433
gene10468	LOC106990267	0.448896	0	0	0.653455	0.667793	0.972768	1.17649	9.89023	1.0543	2.44623	1.24223	7.03055	4.96472
gene10470	PDHA2	0	0	0	0	0	0	0	0	0	0	0	0	0
gene10471	UNC5C	0.890252	1.60967	0.618492	3.92894	8.04081	4.9761	3.28379	5.22357	11.032	0.997576	2.81554	5.05006	5.99324
gene10476	BMPR1B	6.20913	10.6477	7.37524	21.7039	32.8359	28.7032	23.007	20.6084	17.5546	0.549634	28.9248	30.2354	27.2085
gene10478	PDLIM5	83.159	155.584	125.594	262.135	208.283	283.263	267.761	221.763	262.249	34.1013	248.282	240.243	262.421
gene10479	HPGDS	1.2315	3.3118	3.73341	5.05213	7.95267	4.48826	4.36866	2.87773	3.15532	0	5.20486	3.71938	9.20577
gene10481	SMARCAD1	10.4233	18.2519	16.301	27.4147	27.7802	29.7817	30.2716	26.7417	20.7943	2.95676	23.0823	27.3529	28.0482
gene10484	LOC101102814	0.133506	0.30946	0.250429	0.145757	0.33515	0.108491	0.145791	0.408533	0.0470338	0.173615	0.110835	0.095043	0.144445
gene10485	ATOH1	0	0.396389	0.102065	0.0792067	0	0.206345	0.047535	0.0666009	0	0.101084	0	0	0
gene10486	GRID2	0.795877	0.843341	0.925013	4.27983	2.74752	1.72468	2.26584	3.90813	5.1855	1.08543	4.55515	6.8657	9.9819
gene10489	CCSER1	5.70094	8.10786	3.1266	22.104	31.587	35.6026	30.3158	30.3262	35.0204	2.74685	35.4473	39.2656	46.4063
gene1049	GJA5	7.24915	10.6583	7.97921	4.36034	4.6274	3.39915	2.36906	4.07858	10.4402	8.37666	4.82631	2.29644	10.074
gene10494	MMRN1	2.0172	2.87873	4.31278	4.01627	3.39775	5.56991	2.74004	13.7313	26.7207	14.9126	29.9711	13.0449	48.8503
gene10495	SNCA	12.6554	18.9067	12.5135	25.4914	46.6287	32.6862	33.5537	36.3846	38.3637	15.0906	41.2926	26.3997	65.5961
gene10496	GPRIN3	0.244106	0.4556	0.478705	0.508787	0.798495	0.757406	0.886948	0.984648	0.781801	0.305075	0.746137	1.84048	0.720294
gene10497	TIGD2	4.61236	5.76695	5.41983	5.15139	4.96867	3.96357	5.12364	9.5148	6.72383	4.24001	6.60196	5.63299	6.16617
gene10498	FAM13A	9.15636	19.4911	9.44522	22.9375	27.4606	36.1037	25.0427	40.9449	45.178	3.57444	37.0819	35.5994	59.9035
gene10499	HERC3	12.0006	25.2036	21.6871	51.9933	28.1658	44.0883	28.8192	42.6352	29.1602	4.85422	38.6789	31.0827	44.7463
gene105	LOC105616317	0	0	0	0	0	0	0	0	0	0	0	0	0
gene1050	GJA8	0	0	0	0	0	0	0	0	0	0	0	0	0
gene10500	NAP1L5	0	0	0	0	0	0	0	0	0	0	0	0	0
gene10501	PYURF	0	0	0	0	0	0	0	0	0	0	0	0	0
gene10502	PIGY	0	0	0	0	0	0	0	0	0	0	0	0	0
gene10503	HERC5	11.5141	21.2404	10.6474	38.8523	45.3816	46.5807	34.397	33.3439	21.945	3.47494	39.7373	27.9827	41.3981
gene10504	HERC6	1.67013	5.0004	2.65419	5.44485	9.82168	4.7125	4.68113	6.30315	5.66318	1.12473	7.04816	5.12742	9.26075
gene10505	PPM1K	22.2992	36.7254	31.4341	64.4759	36.4395	80.0107	52.9298	44.0979	38.5581	14.4009	48.5393	35.2867	54.1803
gene10506	ABCG2	15.6713	20.0745	17.599	30.0916	28.9593	26.3358	27.3364	34.2309	42.9691	15.0931	43.3957	26.3864	68.528
gene10507	PKD2	12.5338	24.8007	22.3433	35.3178	31.222	35.1569	27.6984	32.5461	29.6839	4.95159	39.6044	25.5303	54.1695
gene10508	SPP1	338.499	195.869	171.674	426.67	397.29	490.871	454.351	378.777	243.525	29.559	252.735	451.006	283.027
gene10509	MEPE	0	0.0221876	0	0.170691	0	0.0544499	0.0878042	0.0615108	0.0708165	0.062239	0.0834395	0.0477005	0.144989
gene1051	GPR89A	17.6665	25.3318	18.362	33.9194	30.8422	36.7753	36.2534	38.4608	30.9208	18.9901	36.4875	29.165	45.5677
gene10510	IBSP	0.0531571	0.0352045	0.0332372	0.0773804	0.0296544	0.143991	0.0232195	0.0975979	0	0	0	0.113528	0
gene10513	LAP3	230.741	225.318	302.968	152.865	143.213	100.293	135.881	156.415	129.68	180.999	102.302	98.009	125.075
gene10514	MED28	17.7197	27.5895	31.1098	34.4187	25.6327	30.847	26.6982	24.7081	14.1663	20.3391	20.2523	18.5881	26.1037
gene10515	FAM184B	1.08179	2.13757	1.19756	1.47148	1.6027	1.97916	1.45633	3.69018	3.42375	0.909306	3.35679	4.4945	5.4492
gene10517	NCAPG	12.9351	17.07	13.4764	26.8695	25.9775	30.9712	34.4555	19.1353	20.062	17.3607	16.3911	18.9141	20.6747
gene10519	DCAF16	0	0	0	0	0	0	0	0	0	0	0	0	0
gene1052	PDZK1	156.269	102.476	151.59	178.442	146.883	156.797	143.377	110.653	47.5939	5.31654	128.122	78.9771	79.8935
gene10520	LCORL	3.5132	6.48044	2.60171	12.9018	18.3489	20.8661	19.6602	14.0107	17.6446	1.04767	14.2858	27.7992	22.636
gene10521	LOC105615456	0	0	0	0	0	0	0	0	0	0	0	0	0
gene10527	SLIT2	6.62986	9.64814	7.50295	17.3267	16.8922	22.9211	14.7509	12.4039	17.6542	2.3661	24.9291	17.72	17.4504
gene10529	PACRGL	8.5437	15.0045	7.87002	25.2071	20.3841	29.5899	27.6899	21.849	17.1459	3.23112	26.4717	17.6495	20.8535
gene1053	RNF115	22.4112	36.1394	26.644	54.9779	49.5036	53.9071	44.6278	65.5794	56.336	12.9273	67.648	55.6292	94.2108
gene10530	KCNIP4	4.36541	7.49152	2.43068	19.7367	23.5531	76.1801	20.7944	18.7992	14.0322	2.67567	46.8226	13.3837	38.2216
gene10539	ADGRA3	37.0092	71.3061	57.6876	66.0529	51.7097	79.7657	69.2942	55.616	60.2519	15.9492	45.8184	39.0049	44.3426
gene1054	POLR3C	9.82847	12.6207	11.7904	13.7247	10.7426	10.9473	9.96277	8.11198	7.57709	8.64164	12.4988	6.80107	10.3903
gene10541	LOC101103396	0.321137	0.602593	0.468522	0.895996	1.10476	0.782898	1.63655	0.425833	0.678815	0.198865	0.533209	0.952575	0.849323
gene10542	PPARGC1A	2.10835	4.29256	1.58884	7.39803	10.9194	14.8737	8.60623	8.20402	7.94016	0.848358	13.2078	6.17417	8.40723
gene10545	DHX15	53.9446	95.1145	76.2404	163.668	127.034	165.391	151.81	129.733	114.115	44.0614	126.74	103.213	145.182
gene10547	SOD3	4.73399	8.09369	8.90098	4.15429	3.93328	2.40096	2.28784	8.87667	12.254	5.4639	8.69643	5.16277	12.0116
gene10548	CCDC149	8.55326	13.2868	9.53604	19.5232	14.4199	22.4022	13.3787	30.9077	28.9144	3.06115	32.0843	22.7445	30.3707
gene1055	NUDT17	9.17001	11.5591	9.16536	10.3217	6.19958	6.42687	4.88408	8.34517	4.32345	3.74912	7.58456	3.78584	5.45861
gene10550	LGI2	0.539426	1.46659	1.26038	0.764575	1.15619	0.938235	1.16573	0.434387	0.620127	0.168779	0.377117	0.282961	0.941994
gene10551	SEPSECS	3.98877	7.83691	5.91641	12.9032	9.87735	12.4854	10.5895	12.1787	9.57123	3.33458	14.0184	11.3742	16.1116
gene10552	PI4K2B	3.83175	7.83147	8.00735	9.37031	7.46506	8.99087	9.37741	8.75906	8.78491	1.94226	10.5615	7.34649	10.555
gene10553	ZCCHC4	7.38011	14.703	8.77515	20.1214	19.843	29.2001	20.3727	23.2499	26.2557	3.12419	24.4071	27.9922	32.5502
gene10554	ANAPC4	21.4433	31.3566	20.0733	44.8781	34.3151	50.8495	32.0072	55.5837	35.0527	38.7349	45.4919	30.7056	58.191
gene10555	SLC34A2	0.243406	0.214935	0.284094	0.212594	0.199154	0.281315	0.127586	0.35752	0.0228671	0	0.269431	0.115521	0.117045
gene10556	SEL1L3	5.88881	11.984	10.3848	9.34213	5.94834	7.78989	7.14246	10.2172	8.92287	2.88901	4.65151	5.47436	5.42285
gene10558	SMIM20	105.45	86.5491	80.2821	140.768	182.298	175.285	244.916	126.354	162.255	109.814	160.45	291.944	160.566
gene1056	PIAS3	3.39224	7.04486	5.30699	5.8322	3.27082	5.3091	3.18305	6.23679	3.34426	1.00624	7.97347	2.86216	4.95402
gene10562	RBPJ	24.4435	33.055	29.393	47.4913	45.0119	51.1967	39.4706	60.509	62.4352	9.83271	72.513	42.2779	87.6415
gene10564	CCKAR	0.0120424	0.047852	0	0.0525899	0.0537439	0.0782881	0.0631226	0.0884404	0.03394	0.00894873	0.0599848	0.034292	0.0694886
gene10565	TBC1D19	2.64544	4.5531	2.96153	7.95554	8.37754	9.98934	8.17881	8.32783	7.40006	2.04235	5.02368	8.60451	9.78062
gene10566	STIM2	6.17826	9.6933	8.41246	10.776	10.7795	12.0465	10.4875	13.6862	12.2167	2.87597	12.8871	13.0948	13.3182
gene10569	LOC101106847	0	0	0	0	0	0	0.110416	0	0	0	0	0	0.0911641
gene1057	ANKRD35	55.0238	58.6755	56.8494	35.8087	19.5183	27.9304	23.6819	36.4161	18.1747	10.8227	41.9901	14.4796	20.1113
gene10574	PCDH7	25.276	40.6835	27.5639	71.21	70.7101	95.3717	96.4314	62.0229	56.844	7.62955	48.9698	57.2822	44.5295
gene1058	ITGA10	1.00533	2.41355	0.9429	2.86594	1.21515	2.25801	0.905725	1.82019	0.826415	1.77429	1.63446	0.954267	2.31139
gene10582	ARAP2	14.9537	34.7038	22.3743	62.443	55.5561	83.9534	70.8267	62.0916	66.7002	2.64609	46.2491	67.101	62.1054
gene10583	LOC106991214	2.76653	8.32124	5.04529	13.3402	14.4046	17.8605	19.5366	4.86779	10.0713	1.45621	6.41176	14.9354	6.06959
gene10584	DTHD1	0.0680419	0.0450623	0	0.16508	0.101221	0.0737241	0.108978	0.166569	0.0799035	0	0.150634	0.322928	0.425344
gene10585	NWD2	0.0137047	0.0363051	0.0257073	0.0897746	0.0458722	0.0519723	0.119727	0.109037	0.0869069	0.0916566	0.0682653	0.107321	0.138392
gene10586	C6H4orf19	0.0300337	0.073879	0.0321926	0.0312284	0.16276	0.172007	0.112449	0.141795	0.157201	0.0733311	0.334824	0.201593	0.290904
gene10588	RELL1	21.0797	30.1108	26.3349	36.6421	31.82	41.8062	37.4269	39.8917	53.586	11.2261	51.2651	29.8662	68.2717
gene1059	PEX11B	23.9678	29.9119	27.0377	35.5617	31.4201	31.5133	27.6606	35.6941	22.1193	14.0941	32.4497	24.5396	32.4666
gene10590	PGM2	18.0261	59.2573	40.8173	51.1765	29.8414	37.98	34.5672	25.1018	33.7078	6.17259	28.2706	23.1138	39.8267
gene10591	TBC1D1	4.28701	11.4838	6.13451	11.6739	12.5527	9.12827	7.93761	14.3454	14.6673	5.88799	15.812	10.8868	18.9377
gene10595	LOC106991215	0	0	0	0	0	0	0.0835332	0	0	0	0	0	0
gene10596	KLF3	34.3856	57.78	45.6275	80.5086	56.3556	94.723	62.3876	80.0325	62.0972	11.3894	93.3745	78.0382	75.1033
gene10598	TLR10	0.0501992	0.199473	0.0941633	0.219224	0.0840127	0.0271957	0.0438549	0.645169	0.176851	0.0932581	0.500099	0.714738	0.144833
gene10599	TLR1	0.352137	2.22447	0.609726	0.946344	0.755554	0.586991	0.473282	1.62462	1.336	2.19404	2.06887	1.38842	3.04793
gene1060	LOC101114745	1.44292	1.86677	1.09104	2.10045	4.82971	7.01721	2.93154	2.42334	3.64113	0.174551	3.67728	2.81888	4.01785
gene10600	TLR6	2.03838	5.33235	4.01475	3.00434	2.61541	2.23621	2.35951	3.89846	4.02146	1.32539	3.21526	3.08364	5.40323
gene10601	FAM114A1	29.3272	38.9704	40.6233	46.2971	52.4465	44.1508	38.0099	68.2992	78.8183	22.6784	68.8816	63.9938	82.5136
gene10602	TMEM156	0.525291	1.47851	1.19062	1.72049	2.23443	2.77465	2.03639	1.84853	2.82215	1.02466	5.01505	5.09515	4.16778
gene10603	KLHL5	8.34113	16.2056	13.1792	20.7575	24.8493	26.8506	20.6666	22.4317	22.4355	3.8193	21.7799	22.3478	35.0249
gene10605	WDR19	3.54269	7.38413	4.81074	10.9944	9.43305	11.2448	8.38297	12.0778	9.29554	2.48723	12.017	8.16958	12.6668
gene10606	RFC1	24.0187	23.9558	21.1432	33.7819	34.1042	42.6269	37.3098	38.3923	37.2243	0.564454	40.4891	26.3291	47.0048
gene10608	KLB	0.685961	0.824067	0.797966	1.7881	1.70867	2.0396	1.85355	1.21063	2.00074	1.4818	2.70171	1.7035	3.12976
gene10609	RPL9	353.42	331.07	197.325	430.926	694.198	642.889	582.855	395.253	522.629	346.563	366.187	726.89	313.396
gene1061	RBM8A	15.853	17.2568	15.3652	28.3967	24.6209	29.5527	25.3393	22.9698	24.8277	65.2517	22.6874	19.8319	25.2378
gene10610	LIAS	19.9076	23.4028	19.5495	39.1133	25.709	38.0675	27.7058	34.7321	20.9399	10.1043	29.4717	19.7659	37.058
gene10611	UGDH	30.9254	54.4412	37.5257	66.4188	41.1584	74.8111	52.0847	70.7036	64.0327	32.5264	56.8186	40.1719	85.555
gene10612	SMIM14	32.4965	41.3859	50.0048	60.7158	53.3161	55.4385	53.5	69.6681	76.0864	34.1336	75.3773	70.2127	86.1166
gene10613	UBE2K	39.2637	51.0415	49.3323	84.4032	82.0725	103.07	87.1193	90.0385	80.7551	24.4815	80.4351	96.1154	112.231
gene10614	PDS5A	28.2351	47.3497	45.1654	69.989	59.7882	76.1907	65.5106	65.0662	58.2069	18.8316	65.7495	59.4923	70.6686
gene10617	N4BP2	8.07587	15.7442	15.9023	21.3268	18.8583	28.5029	30.1187	17.2524	20.3506	0.772274	17.9865	31.1455	17.5221
gene10618	RHOH	14.0488	13.0258	17.8387	24.8555	22.909	33.8397	23.9801	20.5029	16.2948	1.68642	30.8626	42.1596	31.3353
gene1062	LIX1L	7.73776	15.2736	14.1775	14.2759	13.9719	12.284	9.20771	15.8029	19.4996	8.37669	19.7546	13.5642	22.4181
gene10620	CHRNA9	0.0582019	0	0	0	0	0.0315312	0.0762694	0.0712402	0	0	0.0483187	0.0414341	0.125942
gene10621	RBM47	19.9896	26.4771	22.4839	61.9039	61.5012	79.2064	54.3411	75.6993	50.3899	1.32776	91.7834	88.5958	87.5412
gene10622	NSUN7	1.84755	2.28402	1.44401	7.23914	6.52763	8.95822	4.08893	2.5818	6.11835	0.617815	7.49014	5.21725	9.63931
gene10623	APBB2	57.6055	129.639	62.8935	252.339	203.717	252.328	172.879	228.055	257.778	23.6399	233.206	204.142	312.683
gene10625	UCHL1	5.34806	4.45473	5.92948	10.1126	5.7209	3.16616	6.30983	2.09206	8.08031	21.1409	3.84487	5.18106	4.21543
gene10626	LIMCH1	5.01893	11.2587	7.39572	14.3113	19.4711	14.5651	10.106	21.0332	22.7812	2.32531	26.1433	15.1416	30.3185
gene10627	PHOX2B	0	0	0	0	0	0	0	0	0	0	0	0	0
gene10628	TMEM33	19.8177	29.9756	37.1377	45.4962	33.0157	42.8092	41.3488	34.8003	30.5154	8.06014	35.8584	39.3656	41.2933
gene1063	ANKRD34A	0.0724083	0.159847	0.0905486	0.0702694	0.0807877	0.0784551	0.105429	0.118172	0.0680248	0.143485	0.0801502	0.0687302	0.0696368
gene10630	SLC30A9	25.8295	33.701	24.4224	42.0077	38.4098	43.6423	47.0655	50.2222	45.3052	15.7056	39.2764	41.6084	56.4637
gene10631	BEND4	0.041422	0.0548654	0.0647493	0.0602978	0.0231078	0.0336609	0.0633273	0.0633767	0.0583717	0	0	0.0147442	0.0298774
gene10632	SHISA3	1.86047	3.38316	1.97167	1.92792	6.19214	3.89501	1.10193	0.578962	0.888734	0.679546	0.942435	0.538769	0.454897
gene10633	ATP8A1	8.8209	10.1392	8.79827	26.1413	22.131	43.2552	27.3656	32.6005	20.284	2.37424	25.5294	56.1649	29.9544
gene10634	GRXCR1	0.279448	0.185071	0.0873643	0.81358	0.155893	0.984049	0.305163	1.02615	0.590694	0.571062	0.579987	1.9894	1.00782
gene10636	KCTD8	0.831495	1.03358	0.399926	0.688997	0.913447	1.59396	0.759936	2.83408	2.92033	0.389744	1.23192	2.20385	1.23641
gene10638	YIPF7	11.8683	1.50026	13.8563	12.5452	21.4286	4.96235	15.1008	22.8454	2.4289	0.402544	0.654137	12.621	1.84708
gene10639	GUF1	0.493154	0.181446	1.40471	0.35894	0.336248	0.207798	0.622307	0.804839	0.154433	0.223951	0.0909804	0.156034	0.0395232
gene1064	POLR3GL	21.6471	24.6116	22.1519	27.1837	25.4997	25.5352	24.2411	22.5921	28.061	10.586	30.0291	16.05	31.3618
gene10640	GNPDA2	21.5973	38.5648	25.4898	60.7708	57.0765	76.7044	64.7421	57.3007	52.9072	31.4041	52.9562	55.118	51.1969
gene10644	GABRG1	0.157049	0.122364	0.0577632	0.242064	0.319526	0.140136	0.282473	0.226154	0.195276	0	0.260762	0.486676	0.319845
gene10645	GABRA2	0.351962	1.16547	0.440138	1.24427	1.51467	1.11682	1.44955	0.61544	1.45252	0.896724	0.793102	1.53917	1.30561
gene10647	LOC101121518	0.188247	0.664911	0.941633	0.27403	2.94044	1.2238	1.31565	2.53459	2.65276	2.14494	0.937685	1.16145	1.90094
gene10648	GABRA4	0	0.0381531	0.0900528	0.0209654	0.0803453	0.0156051	0.100657	0.0176287	0.14207	0.0856196	0.215221	0.205061	0.270096
gene10649	GABRB1	124.025	141.746	165.299	162.278	95.9417	90.6721	146.092	204.608	99.9943	190.536	212.795	124.33	175.63
gene1065	TXNIP	396.096	448.696	469.552	485.636	427.434	328.064	465.191	515.01	359.635	167.34	553.137	240.364	436.133
gene10654	COMMD8	14.7228	29.4904	29.7829	44.7547	38.0871	45.2763	47.0033	34.0101	42.3081	8.84898	35.1702	57.9033	55.752
gene10655	ATP10D	11.2054	25.4458	24.7583	35.3448	27.3978	27.7494	25.651	38.0957	31.7163	4.16785	33.3502	45.9519	39.6945
gene10658	CORIN	0.634038	1.11238	0.785928	2.40457	3.0034	2.21764	1.39934	2.27376	1.84967	1.29361	2.78885	5.07597	3.07292
gene1066	HFE2	0	0	0	0	0	0	0	0.0340749	0	0	0	0	0.281116
gene10662	NFXL1	4.47841	8.43556	5.81858	10.0328	10.8856	12.3988	10.5686	10.0734	8.2575	2.67963	8.52228	10.6204	10.2151
gene10663	CNGA1	0.122921	0	0.0307431	0.393656	0	0.0266371	0.0214771	0.120366	0.0692875	0.0730743	0.285733	0.070006	0.248253
gene10664	NIPAL1	7.56296	19.0502	26.738	27.0568	13.2437	22.2503	19.2391	16.4119	15.3543	1.94321	21.7094	21.2443	14.6826
gene10665	TXK	0.220685	0.621153	0.275973	1.24484	1.06184	1.2703	0.542234	0.725954	0.77747	0.358733	1.30538	1.04083	1.01476
gene10666	TEC	19.345	29.7069	24.2729	63.1158	31.9274	70.5034	43.4358	56.0208	42.3139	13.9236	52.8124	37.6211	58.5698
gene10668	SLAIN2	25.8156	43.8449	41.6362	57.142	47.9289	53.4072	49.4901	48.1955	45.457	10.3897	46.7896	45.6192	57.3411
gene10669	SLC10A4	0.110367	0.146186	0.24153	0.240991	0.184709	0.298959	0.144628	0.472819	0.311057	0.512589	0.32069	0.314282	0.437838
gene10670	ZAR1	0.291146	0.347072	0.273065	0.805256	1.85158	1.45111	0.546853	0.463278	0.451309	0.194717	0.483413	1.92759	0.483003
gene10671	FRYL	12.181	26.8429	17.2278	43.804	39.9948	49.7813	41.7143	41.3814	40.7097	4.7705	39.6091	49.6051	42.6972
gene10673	OCIAD1	242.759	328.886	331.586	466.331	398.357	476.385	412.953	305.438	289.231	120.286	336.831	278.73	374.318
gene10674	OCIAD2	45.9134	62.0507	64.3293	130.589	94.8036	92.5719	138.051	68.502	91.1074	21.5541	86.4261	123.383	94.7681
gene10675	CWH43	8.58579	14.1713	15.148	24.5606	14.7589	19.9397	19.2605	17.8208	10.6922	5.37861	12.4875	12.0823	10.5855
gene10676	DCUN1D4	21.3046	34.2365	24.4736	62.515	52.3691	73.9844	59.4294	60.7425	38.2429	6.29266	52.4245	45.8544	68.3121
gene10678	LRRC66	0.8666	2.17488	1.35464	2.50641	0.610666	1.50729	1.39462	1.81441	0.610604	0.440614	1.06023	1.13646	1.2337
gene10679	SGCB	5.44061	15.0485	20.8111	19.2755	10.3105	10.7496	14.3988	13.4167	9.80908	3.86458	16.4064	10.7652	15.6394
gene10681	SPATA18	0.026309	0	0	0	0.176121	0.256554	0.137904	0.354229	0.222446	0	0.524195	0.262212	0.531341
gene10684	USP46	15.6621	25.1632	25.5134	41.984	31.0177	40.7199	30.9366	40.6897	25.6934	4.87347	48.5121	31.4589	44.3737
gene10686	RASL11B	4.01593	4.93321	4.57654	7.02459	4.04706	5.29877	5.48894	3.40919	2.4645	3.36932	5.43118	3.18174	3.41059
gene10687	SCFD2	14.7002	24.4399	14.9488	34.7505	36.1872	39.7709	40.6283	43.5003	41.9114	11.0572	37.6103	38.9726	40.2635
gene10688	FIP1L1	33.6726	59.2791	43.5592	62.6599	59.9475	74.3585	61.2343	53.8086	62.4652	22.9352	63.614	55.6802	77.5096
gene10689	LNX1	6.38328	9.06646	9.03676	27.6133	12.0715	24.8053	12.5998	19.9385	20.8051	2.92363	25.8968	22.2212	29.3482
gene10690	CHIC2	24.8933	40.4247	30.1688	47.8232	53.5884	59.6837	66.2727	42.7317	49.5444	10.116	46.0717	63.4226	55.7863
gene10691	GSX2	0.0434989	0	0	0	0	0.0471315	0	0	0	0	0	0.123868	0
gene10693	PDGFRA	13.7177	33.4841	32.7493	32.3948	30.2221	29.8418	20.6322	18.9207	17.8733	8.29002	26.4845	14.3147	27.8636
gene10696	KIT	2.32314	4.80116	4.24441	6.30785	4.98176	7.35507	3.81438	6.41315	7.73163	0.979481	8.78151	6.16968	8.55659
gene10698	KDR	5.51996	15.1531	13.8716	9.10878	6.76993	6.67718	5.91748	13.8483	15.2159	3.53046	13.3106	9.74918	17.932
gene10699	SRD5A3	13.8249	14.1753	13.076	12.9738	14.2894	19.4276	12.8747	10.1789	20.0258	7.82232	25.751	12.5398	19.3361
gene107	USP40	22.4851	31.2173	28.3371	29.6732	27.2357	27.5282	19.7581	35.8122	35.0934	24.9452	47.126	22.0751	27.9381
gene10700	TMEM165	14.2357	21.2679	16.9889	32.6937	25.542	31.0997	25.3656	27.2959	23.6657	9.31134	25.7244	23.335	30.9816
gene10701	CLOCK	22.3432	32.5832	27.8181	46.5915	60.995	63.6451	48.3379	45.6308	55.0916	9.82348	59.8214	60.2025	72.7077
gene10702	PDCL2	0.0658698	0.0872476	0	0.287659	0.587941	0.356853	0.23018	0.0806258	0.27847	0	0.437476	0.375143	0.475114
gene10703	NMU	2.39133	0.479912	0.0906189	0	1.13191	0.706644	0.379838	1.68526	10.4159	1.83085	4.69243	4.43654	2.92701
gene10706	EXOC1	17.4076	27.1499	23.7456	44.0118	38.7239	44.8078	40.2868	35.534	35.1125	11.9745	44.6226	41.7432	49.8352
gene10708	CEP135	2.3433	6.74923	2.77303	7.23434	8.40495	8.70756	8.55958	5.69799	11.3027	0.280481	5.5881	6.56086	10.0051
gene10709	KIAA1211	2.26985	2.03667	2.10599	2.71797	4.55447	3.96678	1.89503	7.32674	8.62864	0.591718	7.65921	5.26475	12.7413
gene10710	AASDH	5.87236	9.25976	8.58496	17.2188	12.5267	17.543	15.9769	14.8892	12.2553	4.82093	16.4363	15.1097	19.8876
gene10711	LOC105615499	5.44696	6.50815	4.95069	9.31874	9.36658	11.9558	6.96615	9.17596	9.65413	6.8852	11.8412	9.27451	16.4445
gene10712	PPAT	0.0765018	0.168884	0	0.556816	0.540582	0.607864	0.467834	0.436985	0.467159	0.227395	1.22788	0.726158	1.06682
gene10713	PAICS	0.335789	0.704217	0.384922	1.16091	0.827349	1.36437	1.03895	1.25016	0.611207	0.176748	1.09185	1.01596	1.97799
gene10714	SRP72	59.948	58.1091	53.355	82.9268	82.1519	97.3541	91.6677	87.0399	85.7965	35.6169	77.0546	60.4094	91.4663
gene10715	ARL9	0.713024	0.28333	0.356663	1.14174	1.67063	1.46788	1.24582	1.30913	3.61724	0.900747	4.73557	1.01521	5.04013
gene10716	THEGL	0	0	0	0.139978	0	0.0347298	0.112008	0.1177	0.271013	0.19055	0.10644	0	0.554871
gene10718	LOC101110060	0	0	0	0	0.14652	0	0	0	0	0	0	0.186978	0
gene10719	HOPX	406.189	462.277	416.249	666.423	653.37	775.081	990.145	451.39	458.161	205.093	418.898	815.425	475.544
gene10721	LOC101110593	7.1604	11.0063	10.4401	15.9878	14.9053	17.1514	14.8055	11.5201	10.0023	3.78157	13.0701	14.1684	15.6408
gene10723	LOC101118448	0.106379	0.181162	0.0570129	0.154855	0.220424	0.181127	0.106211	0.148811	0.107078	0.0677578	0.35326	0.346201	0.284999
gene10726	LOC101111099	8.10869	11.931	10.1633	14.9335	12.3247	15.2522	14.7264	11.8535	10.2645	4.04232	13.3712	12.6667	14.9594
gene10727	NOA1	10.9042	13.9713	13.1906	15.2749	12.1966	15.7333	10.9143	11.9384	11.1192	7.73648	14.3294	13.1069	15.2559
gene10728	POLR2B	50.0318	82.6859	81.8486	121.606	114.801	145.764	120.341	137.113	125.652	41.3125	128.389	107.224	168.682
gene10731	IGFBP7	463.21	553.241	547.583	359.076	507.395	311.396	328.884	470.117	528.641	335.602	374.657	342.96	530.899
gene10736	ADGRL3	36.356	51.8074	33.513	236.582	223.784	303.402	238.62	187.747	149.063	4.78936	209.447	337.308	171.686
gene10737	LOC101114018	0	0	0	0	0	0	0	0	0	0	0	0	0
gene10739	TECRL	0	0.0488152	0.0460874	0.268243	0.328954	0.19966	0.450753	0.405993	0.571284	0.273866	0.489538	1.10194	0.372159
gene10742	EPHA5	0.254921	0.399046	0.173883	1.09639	1.25404	1.54426	1.23499	1.02118	0.587835	0.30137	1.69306	1.60031	2.03931
gene10745	LOC101120496	0	0	0	0	0	0	0	0	0	0	0	0	0
gene10747	CENPC	16.8972	25.9188	19.3908	36.4502	42.4443	50.5035	47.38	40.3206	49.923	5.67863	40.2821	46.5057	57.4474
gene10748	STAP1	2.0781	4.10763	1.83909	7.16709	7.88319	8.41766	7.73666	5.71338	13.2906	0.926546	11.1476	10.9248	10.5155
gene10749	UBA6	15.1213	28.606	25.8548	41.748	42.4644	54.4492	52.0765	33.5899	36.8958	10.0922	33.3405	38.5576	51.7067
gene10751	GNRHR	0.737742	1.34361	1.34541	3.04279	2.33217	4.56296	2.44375	2.70903	4.2018	0.411165	4.3383	4.2016	5.63169
gene10752	TMPRSS11D	0.615219	0.436546	0.989163	1.18343	1.00511	1.04751	0.595052	2.63564	2.69378	0.898016	4.23192	2.37758	2.15537
gene10753	TMPRSS11A	0.0365943	0.0969417	0.0457623	0.21308	0.408292	0.0396503	0.159847	0.425525	0.36098	0.095177	0.668366	0.390774	0.607091
gene10754	LOC101121267	0.0244489	0.0323837	0	0.284721	0.218226	0.0264907	0.0854361	0.119704	0.137813	0	0.0811891	0.243674	0.141079
gene10755	TMPRSS11F	9.54691	15.7521	17.1361	50.2781	22.0381	37.4085	29.4549	22.6324	14.4779	2.65019	21.2492	27.557	16.9383
gene10756	LOC101115964	0.0989094	0.30569	0.206148	0.191976	0.0735705	0.643016	0.230424	2.74418	3.62394	0.4165	0.766394	1.31439	0.332932
gene10757	TMPRSS11B	0	0	0.123558	0.359573	0.275597	0.160584	0	0.120939	0.348087	0.0734222	0.0820268	0.281357	0.285069
gene10758	LOC101121777	38.4615	37.5005	52.6328	56.5202	77.3868	107.626	67.5944	78.9445	67.8289	15.2306	102	177.896	102.694
gene10760	LOC105615508	0.378583	0.422274	0.0249173	0.957174	0.666938	0.949933	0.887767	0.146334	0.365024	0.384973	0.231586	0.652508	0.517394
gene10762	YTHDC1	69.3652	89.3714	69.1509	129.252	107.635	139.68	114.701	120.329	93.2878	27.5615	106.06	80.5729	114.685
gene10764	LOC101116729	0	0	0	0	0.0236709	0.0459749	0.0185345	0	0.0597942	0	0	0.0604142	0.0612111
gene10765	UGT2B7	0	0	0	0	0	0	0.052745	0.0369503	0.0850805	0	0.050123	0.0429814	0.0435483
gene10768	LOC101117163	0	0	0.024548	0	0	0.0425388	0.085746	0	0.0276626	0	0.130374	0.0558988	0
gene10769	LOC101117764	0	0	0	0	0	0	0.0287878	0	0	0	0	0	0
gene10770	LOC101118189	0.0288448	0	0.0721424	0.0419891	0	0.0625072	0.100797	0	0	0	0.0478933	0.123208	0
gene10772	LOC101118447	0	0.0312781	0.0295302	0	0	0	0	0	0.0665539	0.087739	0	0.100866	0
gene10774	LOC101122788	0.058613	0	0.0366486	0.255967	0.294282	0.285785	0.256027	0.538075	0.536881	0.435556	0.14598	0.500721	0.422771
gene10775	LOC101123042	0	0	0	0	0	0	0	0	0	0	0	0	0
gene10777	LOC101119393	0	0	0	0	0.144463	0.0350729	0.113115	0.0396211	0.182461	0	0.107492	0.230441	0.233481
gene10780	UGT2A1	0	0	0	0	0.023463	0.0227856	0.0183717	0	0	0.125016	0	0.0598835	0
gene10781	SULT1B1	0.209498	0.45092	1.04793	1.33422	2.24976	1.44708	0.823594	1.3142	2.5832	0.311357	1.21746	2.75913	2.30441
gene10783	SULT1E1	0	0.043303	0	0.0951812	0.109428	0	0.199927	0.160066	0.0460704	0.242941	0	0.139644	0.471621
gene10784	CSN1S1	0	0	0	0.0816328	0.125136	0	0	0	0.0790252	0	0	0	0
gene10785	CSN2	0	0	0	0	0	0	0	0	0	0	0	0.0814592	0
gene10786	CSN1S2	0	0	0	0	0	0	0.0531056	0	0.256986	0	0.201863	0.0865504	0
gene10787	PRR27	0	0	0	0.0902514	0	0	0.0541634	0	0	0	0.102942	0.176549	0.0894389
gene10788	ODAM	0	0	0	0	0	0	0.12994	0.0910292	0	0	0	0	0
gene10789	CSN3	0	0	0	0	0.0813238	0.236927	0.382062	0.535303	0.513572	0	0	0.726455	0.63089
gene10790	LOC105614272	0	0	0	0	0	0	0	0	0	0	0	0	0
gene10791	CABS1	0	0	0	0	0	0	0	0.0455963	0	0	0	0	0
gene10792	LOC105612196	0	0	0	0	0.279198	0	0	0	0	0	0	0.0890729	0
gene10793	LOC105615578	0.0141873	0.00939589	0	0.0413048	0.0712313	0.122977	0.037183	0.147607	0.139949	0.015814	0.306233	0.101	0.184198
gene10794	LOC105615513	0.0301001	0.0398689	0	0.0438165	0.134334	0.0652275	0	0.221058	0.0424168	0	0.0999552	0.0857133	0.173688
gene10795	MUC7	0	0	0	0.0293783	0.0150115	0.0437341	0.0235081	0	0.0284399	0.0349932	0.0223395	0.0191565	0.00970459
gene10797	AMTN	0	0.0163687	0.0927238	0.0359787	0.234397	0.12051	0.14035	1.55801	0.835907	0.073466	0.923351	0.457478	0.303066
gene10799	AMBN	29.0812	41.5713	26.4565	21.4461	13.8278	14.8281	11.4067	13.3752	21.3022	35.0487	14.7814	9.49404	5.3888
gene108	DGKD	4.04502	8.35947	4.8451	6.72189	4.30922	5.59733	3.66153	5.39857	3.48537	1.12267	5.11812	3.36538	7.06562
gene10800	ENAM	0.132723	0.319631	0.0905311	0.93089	0.551942	0.823619	1.00138	1.38825	1.27522	0	1.82306	1.51177	1.61874
gene10801	JCHAIN	12.1539	34.0907	11.0862	11.7949	11.4865	10.2252	12.7414	21.3523	24.9184	7.68572	33.95	122.966	20.6959
gene10802	UTP3	22.1515	22.5628	22.3827	23.0421	22.0506	18.9004	24.7363	23.5506	23.6842	26.4827	20.8822	15.543	22.0144
gene10803	RUFY3	13.1145	19.7481	10.892	34.687	23.7481	34.9933	28.051	29.463	25.8204	9.22174	28.5215	23.9716	42.8571
gene10804	GRSF1	31.7074	42.8734	52.1883	36.8223	30.8532	29.7475	32.3008	30.072	27.4177	16.4393	30.6951	24.9726	35.4736
gene10805	MOB1B	24.7582	40.2638	41.7206	80.1466	62.6552	79.96	76.4108	49.8018	49.0835	18.003	54.4219	61.2145	66.22
gene10806	DCK	3.20376	6.36529	6.837	7.70523	5.80859	6.18798	7.21012	6.05269	4.6374	1.42326	6.50478	4.71028	7.18373
gene10807	SLC4A4	2.44368	6.10926	4.80492	10.7975	11.4231	12.464	7.95589	14.7632	19.7869	3.13551	14.6903	10.5946	37.5418
gene10809	GC	0.102774	0	0	0.0498693	0.152891	0.074238	0.299285	0.0838651	0.193105	0.0763721	0.0568815	0.195107	0.197681
gene10811	NPFFR2	0	0	0	0.314627	0.0803825	0.624493	0	0.881845	0.203051	0	0.119622	0.205156	0.935381
gene10812	ADAMTS3	0.703972	1.1557	0.669552	2.04953	2.99794	2.84692	1.85367	2.0753	2.10982	0.523125	2.02493	3.30342	4.09077
gene10816	LOC101103154	7.20469	13.4935	10.5113	21.3703	20.6147	26.7347	17.5965	18.1115	19.1593	3.68436	24.0537	22.2258	30.2861
gene10817	ANKRD17	30.7481	40.3441	32.3874	39.9268	49.5307	46.4064	48.1038	51.4547	51.8135	4.79605	45.907	54.8516	63.7927
gene10818	ALB	3.45144	1.76447	3.25602	4.09872	9.45824	7.77457	3.41198	2.63112	0.341315	0.0224981	2.56374	3.96583	8.77875
gene10819	AFP	0	0	0.0376592	0.0876753	0.100799	0.195777	0.0789261	0.0737217	0.0424374	0	0	0	0
gene10821	AFM	0.123875	0	0	0	0.103657	0.100665	0.0270548	0.0758124	0	0	0.10284	0	0.1787
gene10822	LOC101102731	0.163894	0.130251	0.860808	0.334011	0.256005	0.674808	0.429543	0.240731	0.138575	0.0974324	0.81638	0.980084	0.945725
gene10823	RASSF6	2.91056	5.96189	4.62747	10.4111	7.20701	9.56637	10.152	7.08542	2.80551	0.48242	10.4018	8.1803	7.63263
gene10824	CXCL8	0	0.386825	0.365209	0.668054	0.512035	0.768478	0.801851	0.817066	1.11705	0.713062	0.969807	7.78164	1.74538
gene10826	LOC101103238	0.892139	3.00791	1.52133	0.708371	0.58818	1.27421	0.779389	1.63799	1.7715	1.65738	2.55859	5.1964	2.86647
gene10828	LOC101104151	0	0.0414525	0	0	0	0	0	0	0	0	0.0519627	0	0
gene10830	PF4	3.03292	3.34769	2.6188	1.57678	2.25593	0.938913	0.757031	2.82845	6.81799	2.25377	4.6761	5.55208	2.08345
gene10831	CXCL1	0	1.44647	0.682821	1.58969	0	0	0	0.668346	1.53891	0	1.35992	3.10974	0.78769
gene10834	LOC101104661	1.68649	2.32087	1.50644	4.55932	4.25207	4.53274	2.37267	9.38318	23.1487	7.552	23.4928	38.8876	37.9155
gene10835	MTHFD2L	6.35403	13.4063	5.20351	17.967	16.5314	28.087	16.0635	16.1743	23.0983	5.41116	19.8865	22.8574	22.3883
gene10836	EPGN	3.50276	7.24932	6.61608	11.8444	6.10643	7.66962	9.27585	5.18066	6.53001	2.84694	4.11961	6.23406	5.68466
gene10837	EREG	8.98853	14.3809	15.4001	16.7841	9.77853	22.3738	22.6761	27.9285	19.4607	7.58204	25.7221	36.2652	29.1145
gene10838	AREG	47.6458	51.2537	42.1713	70.2131	58.6572	93.5025	58.6847	72.1522	75.742	35.9769	91.3446	126.537	58.0385
gene10840	BTC	10.9482	18.7442	11.7779	29.9258	20.2164	28.4907	22.8046	34.8772	11.5206	1.17239	30.0059	30.4955	23.7251
gene10841	PARM1	15.9667	12.9582	22.748	20.4355	21.2138	17.5229	13.4659	21.9668	19.2936	7.55649	34.3445	31.0068	35.6627
gene10843	RCHY1	66.6027	102.17	81.605	145.141	98.4324	135.749	134.151	116.42	110.485	56.5547	100.592	142.413	134.809
gene10844	THAP6	2.40894	4.08416	5.12116	9.46802	5.21416	7.93473	6.39766	6.251	3.25887	1.46788	6.95958	6.10515	12.7189
gene10845	C6H4orf26	0	0	0	0	0.238662	0.463541	0	0	0	0	0.710335	0	0.617159
gene10847	CDKL2	2.98164	4.32366	4.31177	7.67275	5.80199	7.6096	6.54289	6.29595	9.00081	0.945072	7.10923	7.96743	9.72372
gene10848	G3BP2	20.0883	36.2648	36.2565	37.7947	32.9167	29.7422	28.9153	36.3889	31.6	8.59476	37.7498	31.0005	42.6417
gene10849	USO1	36.9885	64.2397	55.8778	72.3989	59.5739	69.1907	62.0452	63.6332	61.5569	26.6263	70.5558	55.6929	74.3642
gene10850	LOC105607844	0	0	0.0829868	0.386407	0	0	0.289873	0.243683	0.187032	0.345194	0.550926	0.0944857	0.574392
gene10851	PPEF2	2.97312	3.0928	2.68419	5.63689	2.5243	4.91854	2.88878	3.97644	2.77951	2.24167	7.87434	4.70808	7.92938
gene10852	NAAA	7.67776	13.9096	9.48224	17.1803	13.5928	15.7097	12.4448	14.9509	10.3277	5.54035	19.122	12.1965	15.1949
gene10853	SDAD1	22.898	32.123	27.2446	51.9256	33.7782	54.9197	45.4462	54.5214	51.8334	20.9804	38.0194	31.106	58.3678
gene10854	CXCL9	6.11952	7.72563	12.4355	4.31488	30.0846	13.9863	9.43925	16.7364	16.4387	3.05531	4.1278	21.6464	25.3803
gene10855	ART3	1.1512	1.90602	2.05658	5.44632	4.49548	4.54387	2.33468	7.24674	6.31523	2.35252	3.89112	3.98063	10.1422
gene10856	CXCL10	0	0	0	0	0	0	0	0	0	0	0	0	0
gene10857	CXCL11	0	0	0	0	0	0	0	0	0	0	0	0	0
gene10858	NUP54	16.0409	26.4629	18.221	45.3636	35.0914	49.951	41.3527	30.2066	34.5175	8.97417	36.2675	31.3617	44.2734
gene10859	SCARB2	40.4713	83.208	83.3506	111.936	76.4835	96.8604	82.2272	82.285	104.474	31.9906	78.1397	61.6008	87.5233
gene10861	FAM47E	5.48111	7.56459	4.937	10.4338	10.2209	8.92902	11.0167	12.7611	9.39836	5.26931	5.9823	10.4781	6.30346
gene10864	STBD1	16.7056	18.3123	20.7674	19.3109	13.8093	13.9099	17.6282	13.6186	10.4371	9.46646	14.1285	8.03788	9.28357
gene10865	CCDC158	3.14327	5.00518	3.86631	8.0261	4.4269	8.00261	7.95294	10.7433	5.49448	1.39125	6.95869	2.83686	5.84768
gene10867	SHROOM3	11.1908	16.7888	13.0829	24.429	21.332	27.1784	19.1802	30.6158	21.9076	2.78078	24.9566	24.957	28.4149
gene10870	SOWAHB	2.23231	2.72934	3.24251	0.849882	0.804668	0.893068	1.0501	1.00888	0.895329	0.0765617	1.48259	1.49139	0.941316
gene10871	44450	144.994	227.008	203.174	253.715	199.5	221.952	182.456	182.523	141.4	57.1999	170.517	112.112	196.363
gene10873	CCNI	242.191	237.311	288.578	204.809	192.803	157.064	173.335	175.136	155.009	43.0154	207.355	124.911	211.33
gene10874	CCNG2	20.2038	23.5949	35.6171	43.9511	27.8476	31.3781	37.5869	31.074	19.2171	8.20792	36.1362	41.3404	34.0458
gene10877	CXCL13	2.70187	5.71224	5.52299	8.47128	26.2613	2.13933	4.40306	2.48036	4.61288	0.926665	17.6857	19.8265	5.02201
gene10878	CNOT6L	21.7489	37.6153	34.9297	49.9642	44.915	60.2764	54.8387	39.2891	41.8862	6.16128	36.9832	42.546	43.4077
gene10879	MRPL1	40.0599	37.3696	31.8132	60.9067	83.3177	91.5593	106.337	72.0005	82.0246	51.7009	67.3107	102.911	84.2646
gene10880	FRAS1	2.00162	3.99509	1.20483	4.36776	9.98167	7.49912	3.4183	7.26824	5.49727	0.999403	5.89604	6.60689	6.50116
gene10882	ANXA3	28.5884	40.0112	32.1809	76.0376	52.9554	67.8607	48.4619	69.2554	71.9876	53.6962	61.4039	52.7762	76.152
gene10885	BMP2K	10.6152	21.4593	17.9969	18.3657	18.3286	28.2829	20.0372	19.7454	21.2367	4.55189	10.8641	18.3598	17.1209
gene10886	PAQR3	28.678	49.6153	52.6459	68.3299	41.8491	64.8227	50.8802	54.3495	47.7286	15.2698	52.6608	49.6495	69.1595
gene10887	NAA11	0	0	0	0.0475157	0	0.106102	0.028516	0.0399535	0	0	0	0	0.0470879
gene10888	GK2	0	0	0	0	0	0	0	0	0	0	0	0	0
gene10889	ANTXR2	4.13506	9.45268	9.47722	7.52423	10.4363	7.61665	6.14742	10.2101	15.0801	6.48993	13.8263	10.6889	19.2943
gene10891	PRDM8	2.54069	3.91738	3.22685	4.99871	3.52125	4.00026	2.34098	4.32464	6.79703	2.34525	5.17428	4.69138	7.3876
gene10892	FGF5	12.1896	16.0444	4.73071	18.8567	22.2122	34.8612	24.1022	24.3682	35.0011	1.39137	10.5955	11.5885	7.71733
gene10893	C6H4orf22	2.8263	3.16995	0.912095	11.3473	11.3928	21.5845	14.2372	15.4559	27.3657	1.2703	9.1584	13.4678	8.12148
gene10894	LOC105607826	0	0	0	0	0	0	0	0	0	0	0	0	0
gene10896	BMP3	3.0476	4.83515	4.63476	8.59648	6.85039	8.90238	8.26039	2.63719	2.13946	0.306935	2.48375	3.14711	2.89874
gene10897	PRKG2	0.256833	0.788615	0.642354	0.798722	1.05504	1.13842	0.815905	0.743052	0.707403	0.225554	0.833498	0.897579	0.892577
gene10898	RASGEF1B	38.6436	53.3431	45.3434	89.8026	72.6205	103.181	78.5934	120.841	85.2822	23.8884	111.007	102.008	109.917
gene109	SAG	0.163271	0.0540649	0.102087	0.415926	0.318789	0.221132	0.356591	0.29977	0.51768	0	0.406638	0	0.765479
gene10904	LOC105609538	4.37604	6.15114	2.9037	16.5104	15.1954	21.2399	11.9371	15.3039	13.3402	3.25186	21.427	14.7501	20.8709
gene10905	HNRNPD	250.03	346.601	252.648	344.197	328.779	362.382	327.223	275.664	276.524	122.262	256.562	259.261	339.488
gene10908	HNRNPDL	58.1265	83.5951	53.2799	117.464	110.98	157.868	117.616	93.4236	78.4275	56.8198	94.8701	78.654	126.314
gene10909	ENOPH1	53.144	72.7894	54.9775	106.875	86.0125	101.798	85.3318	77.9957	64.9412	25.5974	78.2775	60.7543	77.2617
gene10910	TMEM150C	12.929	22.3128	18.4671	30.2235	35.2492	34.9459	26.3608	48.6989	55.4186	5.76158	60.5192	50.0184	59.6722
gene10911	SCD5	5.26959	11.8577	10.2591	12.4652	13.997	8.2725	6.80078	7.54951	6.45544	1.29045	10.2409	8.6965	10.9276
gene10912	SEC31A	25.1377	52.2625	41.9768	41.649	36.3489	34.4813	30.5843	39.6417	39.061	14.7011	39.1395	30.572	59.0194
gene10914	THAP9	3.13828	3.60954	4.35324	7.30684	6.28693	7.87702	7.38021	6.81107	5.90898	2.44312	7.57528	6.45839	6.68307
gene10915	LIN54	7.89109	15.316	10.3007	20.5369	17.7331	24.9609	21.0227	19.7412	18.5282	4.63638	30.2444	27.1429	28.5958
gene10916	COPS4	68.0562	85.03	73.2898	138.996	142.306	165.566	173.772	115.48	123.52	40.4911	130.581	166.157	160.234
gene10917	PLAC8	0.873642	2.98938	1.72981	5.29897	7.63549	4.89077	3.49813	2.94072	6.87381	3.62474	6.16496	26.9511	2.94071
gene10918	LOC101118024	0.41406	0.548441	0.604092	2.41097	1.46293	0.897276	0.72346	0.760225	1.26423	0.358971	1.26041	7.271	0.995528
gene10921	COQ2	29.8267	40.9474	30.8646	42.8095	40.5595	35.3544	37.0939	28.367	33.8375	24.3404	34.2429	26.0284	39.3464
gene10922	HPSE	0.245966	1.21009	0.197735	0.946277	0.686076	1.35157	0.675338	2.43004	1.21315	0.443891	2.56707	1.72602	2.28103
gene10923	HELQ	2.20555	4.55879	3.09188	9.87719	5.7366	7.59539	6.49223	6.20743	4.83033	1.85817	6.90424	6.56056	5.67435
gene10924	MRPS18C	74.1035	87.1112	59.6554	144.683	161.224	195.411	181.995	112.473	157.814	95.403	113.505	159.45	185.74
gene10925	FAM175A	15.5693	31.2945	15.1517	42.2858	32.4102	52.1183	43.0542	34.4066	30.8187	13.6405	26.6054	27.0411	38.7152
gene10926	GPAT3	2.17957	6.36105	2.81801	7.95884	4.78116	6.52438	4.48595	7.46088	7.65255	0.384323	6.93114	6.78514	6.12855
gene10928	NKX6-1	1.09525	1.20893	1.29356	0.531451	1.69723	1.51636	0.691047	1.11718	0.514475	0	1.31339	0.086635	0.438889
gene10929	CDS1	59.4491	53.4082	69.528	74.1768	63.442	80.2824	61.7995	81.6163	54.2044	21.1409	92.9731	73.5214	97.8333
gene10930	WDFY3	8.30186	17.5445	14.1728	20.7074	18.8658	22.4419	18.2576	22.8299	20.0997	4.08966	21.0917	25.2885	27.2307
gene10932	LOC101110941	664.182	390.357	402.249	743.349	1278.93	1357.94	1525.31	3438.63	1373.42	1941.68	841.747	1322.1	940.55
gene10933	ARHGAP24	40.9076	73.9809	23.2102	226.29	200.656	308.738	196.249	165.83	196.194	13.8993	159.489	171.269	197.374
gene10935	MAPK10	3.06397	3.41757	1.51247	7.04242	11.6051	12.6678	2.99372	3.40493	6.59021	1.85743	15.2621	11.6525	3.54766
gene10937	PTPN13	24.1973	48.8704	37.8702	77.6839	58.591	95.962	70.987	72.1918	63.167	6.78391	68.5254	56.1488	56.7554
gene10940	SLC10A6	2.45804	5.05422	4.68396	9.74621	5.9029	8.85235	7.03526	6.96296	6.06999	0.904593	12.2827	7.43285	5.4371
gene10941	C6H4orf36	0.785014	1.16211	0.635206	1.27718	0.747057	3.25218	1.61365	0.706523	1.04116	0.0343145	1.72512	0.920464	1.16576
gene10942	LOC105612688	0	0	0	0	0	0	0	0	0	0	0	0	0
gene10944	AFF1	24.4476	34.678	24.9543	65.4359	52.1026	71.2878	45.1665	85.3023	55.3645	4.17917	83.9969	59.6126	107.044
gene10945	KLHL8	2.66347	5.16222	3.79897	7.40755	8.22203	9.53361	8.28897	9.08256	9.73712	1.05602	8.98605	13.0488	8.67891
gene10946	HSD17B13	11.2797	5.53349	15.6728	9.66263	8.80432	4.02358	10.6651	3.97718	0.26165	0.206962	5.85748	0.793088	0.26785
gene10947	HSD17B11	7.34978	12.8803	10.0395	16.8304	16.306	17.0298	14.5705	17.7503	25.6541	9.30582	34.9675	21.5733	27.934
gene10948	NUDT9	0.348397	1.84587	2.03318	1.77506	2.13794	1.95038	0.913099	1.99007	1.2274	0.215746	3.08519	1.90152	1.00519
gene10949	LOC105607326	18.9679	27.0695	27.4627	34.668	36.4052	35.0755	31.842	37.6687	37.002	24.6289	42.3171	27.2942	45.1897
gene10950	SPARCL1	40.5221	58.5348	54.7598	83.046	155.66	107.742	91.0042	139.243	113.968	32.5715	127.906	57.7257	122.667
gene10951	DSPP	0	0	0	0	0	0	0	0	0	0.036566	0	0	0
gene10952	DMP1	0.0284623	0.188498	0.106779	0	0	0	0.0248652	0	0.0401088	0	0	0.121574	0
gene10955	LOC101112483	0	0	0	0	0	0	0	0	0.0307136	0	0	0	0.0314414
gene10956	LOC106991241	0	0	0	0	0	0	0	0	0	0	0	0	0
gene10958	PPP2R2C	0.444962	2.29434	1.62957	2.01258	1.11702	0.602651	0.860752	1.65338	2.10505	0.708542	2.0581	1.10869	2.52173
gene10960	WFS1	11.9523	13.3121	18.6225	7.73981	5.73931	5.45651	3.75751	8.59799	6.1829	8.97816	8.07451	4.43138	11.3493
gene10961	LOC101112981	0.150646	0	0.15071	0.131577	0	0.0652906	0.131607	0.885089	0.0849158	0.403005	5.45283	0.257389	0.260784
gene10962	JAKMIP1	0.22061	0.353726	0.2178	0.338043	0.323869	0.52839	0.304309	0.298455	0.310883	0.258847	0.559086	0.545553	0.3015
gene10963	LOC105607318	0.0732933	0.0277372	0.0261873	0.0152418	0.0584109	0.0794141	0.0548832	0.0256321	0.0885295	0.0544646	0.0869249	0.104355	0.0453137
gene10964	CRMP1	0.0434231	0.172547	0	0.316053	0.266465	0.282296	0.132773	0.478356	0.0611915	0	0.216297	0.123652	0.250566
gene10965	LOC106991242	10.0814	12.3872	14.3952	9.7003	8.20068	9.82317	7.95776	10.3444	9.99498	10.6262	10.8743	5.98587	10.5413
gene10966	LOC101113496	6.35323	17.6815	13.0195	24.9919	11.6161	22.5016	14.0843	18.3174	13.5588	3.27476	18.9329	12.0523	15.4429
gene10967	EVC2	6.88617	14.798	7.36074	22.7103	14.6967	28.4982	17.511	13.3602	14.1331	2.87707	15.9407	12.0014	14.9421
gene10969	STK32B	0.238635	0.364711	0.275464	1.14902	1.78183	1.37237	1.41122	1.16837	0.724301	0.477429	1.24963	1.93407	1.19164
gene10971	CYTL1	0	0	0	0	0.070294	0.0682644	0	0	0.0887834	0	0.104609	0	0.181775
gene10972	MSX1	107.947	111.845	114.431	67.1452	49.5226	59.7889	48.4551	20.3409	27.6715	31.6905	15.9777	16.5829	25.6123
gene10974	STX18	15.6545	22.635	14.9374	34.5242	28.6411	34.4327	29.8151	39.3519	30.25	12.4967	33.0551	27.2186	42.7399
gene10976	LOC101103398	6.14747	6.58773	5.48561	6.88025	6.13508	5.35545	3.53538	5.2937	6.05102	4.66003	12.0024	5.58596	10.8736
gene10977	ZBTB49	3.49492	7.6391	4.17266	12.2059	7.17292	11.1422	6.50852	11.5836	8.00569	4.89493	11.0566	7.33102	18.0921
gene10978	LYAR	31.4241	36.1544	29.0214	35.5915	29.1576	33.8746	28.7133	30.4668	34.737	26.7767	29.948	16.2646	28.159
gene10979	TMEM128	34.8142	37.8681	41.0563	54.9288	49.2914	58.4923	48.6533	44.9732	38.9685	20.5082	48.5671	44.3138	51.2556
gene10980	OTOP1	0.509098	0.103742	0.416265	0.228028	0.349546	0.233375	0.410545	0.407441	0.137965	0	0.0975342	0.223033	0.197728
gene10981	DRD5	0.49953	0.294067	0.589972	0.282785	0.216743	0.210484	0.242444	0.0339685	0.0391075	0	0.0921567	0.237078	0.160137
gene10982	SLC2A9	0.0819578	0.379949	0.076868	0.417569	0.205745	0.666016	0.608599	1.88096	2.6275	0.563355	0.986589	1.45865	2.57153
gene10984	LOC105607315	0	0.0475758	0	0	0.0801506	0	0.0627583	0.219825	0.607395	0	0.477109	0.357988	0.36271
gene10986	WDR1	77.5158	96.6187	103.373	46.7461	45.4718	25.742	35.3194	42.245	54.7798	56.1751	43.0189	29.7522	51.4232
gene10987	ZNF518B	4.48507	8.36617	7.61657	7.55265	5.5667	7.26068	5.57596	5.89586	5.31058	3.75688	6.36735	5.72461	6.85295
gene10988	CLNK	0.15986	0.260605	0.215287	1.32464	0.809478	1.02594	0.816453	1.08372	0.502533	0.237585	1.75591	1.36566	1.04662
gene10992	HS3ST1	2.11415	4.50173	2.71074	9.03787	9.19637	8.37991	4.48881	14.3473	9.20172	0.775574	18.5735	6.70613	16.253
gene10996	RAB28	51.7766	76.3529	57.362	115.569	109.846	124.959	125.614	115.954	101.608	28.5858	111.76	109.87	134.889
gene10997	NKX3-2	0.131323	0.173943	0.164223	0.573497	0	0	0.057363	0.562595	0.0925296	0	0.109023	0	0
gene10998	BOD1L1	17.3668	21.6653	18.4337	21.4496	17.0584	21.2623	14.94	22.1686	20.1951	1.38103	25.4815	14.0193	29.1163
gene11	STK25	97.4208	88.2373	72.2434	55.495	51.6518	44.463	37.2156	46.7499	39.9037	139.771	48.4323	28.8343	32.6999
gene110	ATG16L1	23.8896	52.5814	31.9451	73.3967	30.7007	64.3271	26.4496	65.431	36.0538	8.08528	73.3098	30.4219	81.6074
gene11000	CPEB2	26.2769	43.7437	41.873	72.6527	52.2135	73.6547	64.3641	81.2048	66.8876	14.2512	68.7409	111.467	81.5294
gene11001	C1QTNF7	6.97735	12.9214	6.34205	38.1353	47.2314	40.5651	30.0685	56.7581	59.7912	5.46095	102.764	50.1548	48.0904
gene11002	CC2D2A	9.3163	18.668	8.67877	32.6871	24.7867	36.9035	23.3403	28.162	26.7707	5.76448	35.3628	28.9995	39.3574
gene11005	FBXL5	19.1134	32.1474	24.91	59.7136	41.053	58.8677	44.3129	44.0083	41.3223	12.1063	48.838	33.2205	54.0123
gene11007	BST1	3.12768	3.33045	5.90523	4.8654	3.6949	5.11654	4.554	1.91417	3.67292	0.615228	6.16049	2.00831	4.37924
gene11010	LOC101106941	259.379	67.8166	126.54	120.792	157.192	142.652	127.181	149.666	47.6976	0.562269	273.795	214.243	135.423
gene11011	PROM1	3.15948	8.73968	3.18701	5.56481	8.54985	5.84425	3.32441	8.61053	2.77962	1.76411	7.01391	1.29238	3.82756
gene11012	TAPT1	22.3424	33.7466	21.4691	41.9017	24.2972	36.8879	30.9696	34.0586	33.9717	9.84197	40.8806	27.103	44.8612
gene11014	LDB2	8.62724	19.8917	5.84145	45.1623	46.5154	43.8534	25.7744	101.837	134.139	6.70492	104.541	54.875	142.761
gene11018	QDPR	64.1216	39.7283	56.4427	62.5541	41.5094	42.1337	43.882	37.7721	40.777	47.8276	44.4541	39.7626	37.9989
gene11019	CLRN2	0.267154	0	0	0	0	0.289465	0	0.109001	0.125491	0	0	0	0
gene11023	LOC101117587	7.02963	9.85709	4.42251	28.1407	14.3791	22.4974	16.604	13.2784	3.39376	1.0641	17.1836	16.496	15.0861
gene11024	MAN2B2	0.983675	1.25081	0.615057	2.66339	1.09751	2.02506	0.910918	1.66157	0.748542	0.0292389	1.56795	0.840337	1.36227
gene11025	LOC101108390	286.463	475.512	498.345	312.705	203.391	129.385	235.277	120.351	159.325	31.5296	188.779	96.586	135.245
gene11026	BLOC1S4	15.6337	24.7728	25.4275	11.4487	10.9152	8.52159	10.4738	9.39185	8.78532	2.28073	11.3068	8.05705	10.3771
gene11028	KIAA0232	12.5697	29.4549	21.6886	43.8366	24.4979	38.6705	20.4203	31.8351	19.786	2.92143	36.7011	22.8661	35.745
gene11029	TBC1D14	49.7278	67.7375	61.0305	75.5104	42.0788	59.5294	42.6968	71.4321	34.6204	19.7722	65.8048	40.0438	55.7141
gene11030	GRPEL1	75.6227	76.83	70.5338	53.813	42.2112	31.8934	44.926	42.5994	40.199	44.3582	43.4833	33.4048	54.6398
gene11031	SORCS2	144.983	69.865	106.472	68.9229	70.3001	53.7762	49.4516	62.6138	20.6065	2.98343	83.8725	54.4282	44.2867
gene11032	PSAPL1	0	0	0	0	0	0	0	0	0	0	0	0	0
gene11034	AFAP1	3.62004	8.30337	5.31212	13.724	8.65805	11.1399	6.58218	13.8574	11.2395	3.05457	14.3343	10.6996	17.3932
gene11035	ABLIM2	6.31164	6.18474	3.26186	7.12524	3.62882	7.85058	4.16361	9.65696	8.89433	4.1159	18.1257	7.84031	29.5915
gene11036	SH3TC1	2.41575	6.14558	2.71726	6.00982	2.85218	4.61176	2.3896	5.91383	7.15073	4.98653	6.17576	4.45868	9.93848
gene11037	HTRA3	27.5377	17.0712	36.2878	14.6377	22.5237	5.30934	5.12809	22.1795	54.9541	48.3991	21.3996	9.08442	24.3728
gene11038	ACOX3	28.225	29.5095	24.1147	38.5922	25.2729	25.6088	16.6642	31.8118	21.5883	11.1293	39.7876	18.6506	33.8806
gene11042	TRMT44	12.7165	14.7483	7.01345	18.1225	9.69557	15.8708	10.0146	18.8593	9.814	33.3562	14.8038	8.86276	17.3666
gene11043	CPZ	24.4576	11.5145	89.3211	10.6242	22.4384	1.58157	0.99182	18.9387	80.1301	78.7967	23.6976	11.3613	20.5423
gene11044	HMX1	0	0	0	0	0	0	0	0	0.179934	0.23721	0	0	0
gene11045	ADRA2C	0.735069	0.398304	1.04457	0.194552	0.447346	0.108607	0.233516	0.449869	1.41253	3.42637	1.4424	0.285435	0.8676
gene11046	LOC105615584	0	0	0	0	0	0	0	0	0	0	0	0	0
gene11048	LRPAP1	39.9517	47.031	38.1767	33.9753	26.9619	24.9729	23.9544	33.3542	36.0387	29.3995	60.246	28.4244	55.9521
gene11049	LOC106991219	0	0	0	0	0	0	0	0	0	0	0	0	0
gene11051	HGFAC	4.81547	2.11047	2.39104	2.11326	1.85675	3.29937	1.02079	1.43021	1.54679	3.52577	1.29339	1.76449	2.6561
gene11052	DOK7	0	0.073879	0.0697506	0	0	0	0	0	0.0786004	0	0	0.0397077	0
gene11053	RGS12	0.897307	1.65291	1.20385	2.00688	1.05419	1.47446	0.799478	1.50564	0.8709	0.0750694	1.26294	0.812243	0.934399
gene11054	MSANTD1	6.32533	3.99868	5.03364	6.69653	5.0524	3.50466	2.63737	3.07933	2.2284	3.41846	3.69973	1.94448	3.11074
gene11055	HTT	16.1061	32.8876	21.8685	24.8223	11.0006	16.3968	8.13799	22.1212	10.9695	8.86388	22.1779	7.92494	17.8945
gene11056	GRK4	19.7338	36.0557	19.8373	35.3151	18.5013	27.2256	16.3528	34.07	23.9935	26.908	34.2756	14.0636	34.2954
gene11057	NOP14	18.0683	21.0716	19.8282	15.0041	11.3824	14.4593	10.3391	12.0359	11.8524	29.8283	13.8194	8.92526	10.7655
gene11058	MFSD10	15.4103	25.2763	21.4964	13.9997	10.0543	7.42554	5.29247	7.1835	7.41655	2.13836	12.762	4.90578	11.525
gene11059	LOC106991221	88.4818	85.4251	67.7792	76.7775	60.0323	60.8652	37.1642	95.3694	79.4169	114.241	110.21	56.5487	104.821
gene11060	ADD1	22.6547	57.5266	36.2011	54.2763	29.6883	44.7374	21.634	48.744	27.0491	4.82395	53.4824	23.7873	54.5958
gene11062	SH3BP2	10.4495	14.7197	6.6078	14.8319	13.4301	11.7586	5.67192	8.72996	8.114	6.95513	8.89149	4.92563	10.9041
gene11063	FAM193A	16.3418	25.7296	18.0762	27.4333	13.3617	18.9894	8.82451	25.2411	15.7639	12.7303	28.5467	12.942	25.5138
gene11064	RNF4	50.489	92.6858	57.2179	133.947	62.7438	111.128	63.6326	105.676	59.3889	19.8147	108.326	57.0891	131.661
gene11065	CFAP99	0.576588	0.487479	0.552286	1.48223	0.301126	1.88751	0.214348	2.26742	1.10642	0.127628	0.733294	0.908284	2.58382
gene11066	ZFYVE28	0	0	0	0.132024	0	0	0	0	0.0426022	0	0	0.086088	0
gene11067	HAUS3	0	0	0	0	0	0	0	0	0	0	0	0	0
gene11068	POLN	2.37966	4.29249	2.11441	5.15051	4.64634	4.52914	3.62443	4.90568	3.97114	2.48963	5.95272	2.47426	4.51693
gene11069	NAT8L	0	0.0930575	0	0.306814	0	0	0.122754	0	0	0	0	0	0
gene11071	NELFA	36.9288	65.868	31.9742	60.0894	25.2103	43.0985	21.0248	41.3326	27.5194	9.72097	40.6348	22.5468	36.9299
gene11072	WHSC1	11.507	22.3818	12.4874	22.3266	8.11228	15.8829	8.41702	16.959	7.44267	4.56821	11.0102	5.78706	8.24927
gene11073	LETM1	52.5162	54.9438	51.8735	38.8443	22.7351	24.1167	17.5278	23.9902	22.5657	40.5346	29.5445	16.0151	31.9824
gene11074	FGFR3	46.7905	68.7446	50.3846	45.6128	26.8623	30.072	24.1608	25.947	16.9145	17.5781	25.0809	15.0511	19.8063
gene11075	LOC106991222	1.27441	1.10776	0.647435	1.15947	0.844248	0.863023	0.835011	0.974938	0.841824	1.50931	1.19025	0.396924	1.09158
gene11076	LOC101104153	30.2252	26.1765	19.5595	11.6919	12.2629	11.3363	10.2482	7.50272	9.08455	73.9782	6.31704	7.52356	7.6228
gene11077	LOC106991247	1.73299	1.86115	1.28857	1.09089	0.836124	0.964228	0.572853	0.515969	0.792036	2.26233	0.311072	0	0.878372
gene11078	LOC106990166	8.50043	12.8789	11.3014	4.64568	2.2296	2.2945	2.03241	1.64284	1.84935	1.10819	1.98091	0.976729	1.41988
gene11079	TMEM129	36.6305	34.1282	31.1304	19.8419	16.2088	12.6089	11.6902	17.4161	14.8187	26.924	16.1775	10.8922	13.7679
gene11080	SLBP	62.4349	76.8229	70.6497	59.1498	52.2556	41.7867	45.7765	49.414	41.1576	34.3289	59.5407	31.7368	47.7722
gene11081	CTBP1	20.6557	27.8648	23.0948	18.2558	12.9989	11.6038	12.0672	13.1708	13.5144	6.67281	19.0066	9.63422	15.7428
gene11082	SPON2	34.7102	36.7036	45.1424	14.4003	20.4608	6.26814	6.51955	9.20528	60.1635	146.205	22.2844	15.238	31.6291
gene11083	LOC101105412	0	0.0847368	0	0	0.0713777	0.138634	0.111778	0.469834	0.270456	0	1.4871	0.273261	0.922884
gene11086	FGFRL1	4.36926	4.75667	4.56571	3.92073	2.47084	2.14009	1.56866	1.46522	5.9041	6.49363	5.06831	1.53394	7.51183
gene11087	IDUA	27.9576	28.5797	30.0281	11.6279	12.5533	6.59676	9.57396	9.35998	18.2574	24.0329	10.675	8.18314	17.6361
gene11089	DGKQ	22.8014	19.3658	14.529	14.4106	11.1179	9.64177	6.53854	13.9547	13.0305	47.2422	15.895	9.91291	16.9173
gene11090	TMEM175	13.4204	32.4578	10.3674	16.1356	8.07445	9.18129	4.72174	8.91423	5.68005	3.91423	13.0048	4.76072	13.3473
gene11091	GAK	45.9851	64.3524	44.3869	35.9927	19.5939	21.4423	14.8961	26.8933	19.9508	16.9824	30.1609	13.3283	29.5081
gene11092	CPLX1	0.469788	2.1779	0.440613	0.512901	0.393116	1.27255	0.615624	3.30642	3.64113	0.436377	2.92511	3.17721	4.9134
gene11094	UVSSA	5.99913	9.43999	8.55238	6.25275	3.74829	4.42008	2.4318	4.25897	4.2946	5.81321	6.09604	2.56248	6.36954
gene11095	MAEA	64.655	94.0907	69.41	90.2035	54.1812	69.0107	46.0004	81.1038	57.9131	62.0624	101.421	51.2566	83.0807
gene11096	LOC101108322	0.457698	0.404161	0.190788	2.22089	2.89377	0.991842	3.33211	0.933718	3.22493	1.81396	1.51991	3.47559	1.76072
gene11097	LOC105601929	1.35741	0.321063	0.757804	0.599849	0.297491	0.0525274	0.10588	0.207687	0.478214	1.47702	0.241481	0.103537	0.384643
gene11098	PCGF3	2.68858	5.49433	5.18731	3.46646	2.48548	2.30274	1.99088	3.25953	2.16499	0.475689	2.93353	1.45829	3.32443
gene11099	MFSD7	9.33324	9.94029	9.33718	7.87452	4.84538	5.44845	3.36132	5.96848	4.61674	3.11393	9.29804	4.66461	6.53966
gene111	LOC105616381	1.24494	3.94756	2.35884	6.2605	2.8622	5.92701	3.42759	4.89472	2.23282	0.280339	4.32206	2.20226	4.13609
gene11100	ATP5I	316.844	123.402	150.038	223.046	422.503	353.68	478.903	181.352	470.207	475.268	263.268	655.844	282.415
gene11101	PDE6B	0.864541	1.4723	0.823721	0.779075	0.803825	0.713706	0.305708	0.932236	1.74044	5.3537	1.05951	0.674085	1.87076
gene11104	PIGG	11.3752	18.4246	12.6995	25.484	13.7876	19.3976	11.3355	20.7689	15.4941	9.79511	20.4919	13.3765	24.2033
gene11107	MCC	42.2764	98.6347	36.932	237.726	202.512	254.621	178.969	239.564	180.94	17.4582	206.239	179.835	280.716
gene11109	DCP2	7.61595	13.7771	14.2447	19.3026	13.9359	18.2353	14.8886	13.4134	11.4451	5.57229	14.9213	12.2839	16.2844
gene1111	LOC105615520	0.393968	0.372735	0	0.327712	0.125589	0.48785	0.147505	0.413335	0.555177	1.38015	0	0.560934	0.243571
gene11111	REEP5	116.179	155.127	190.474	152.982	109.907	104.589	99.9305	103.077	105.69	58.7221	143.976	84.711	150.463
gene11112	SRP19	82.2476	83.5302	78.267	115.271	106.415	122.286	100.024	109.915	120.409	192.556	108.211	87.1747	132.683
gene11113	APC	9.22628	15.1702	14.9171	18.7235	15.2372	18.6489	14.783	15.1403	13.9659	2.66746	18.564	12.1869	19.0987
gene11117	EPB41L4A	29.216	52.9773	20.7455	84.6648	68.3795	107.955	66.7871	148.617	60.7679	17.0648	130.04	71.8412	107.088
gene11120	NREP	25.9051	36.2487	33.7129	55.2781	80.7917	57.1682	47.965	33.5392	31.2834	8.00828	38.7788	32.9147	45.9527
gene11121	YTHDC2	10.4838	20.3753	16.1922	35.8023	23.8154	34.3471	28.6312	27.027	23.2878	8.55116	25.8714	23.6142	38.8631
gene11122	KCNN2	1.33313	4.79933	1.88085	5.99605	9.82071	10.0001	11.0642	5.18821	5.78043	1.47328	4.68242	5.76736	4.38874
gene11124	TRIM36	4.80286	7.32739	6.46202	8.1452	5.88923	6.49205	6.39766	6.82948	4.57912	0.989433	7.97458	6.77063	9.94691
gene11126	PGGT1B	10.8604	16.5756	15.1376	22.7338	20.9055	22.2046	20.9418	17.947	18.0914	6.05598	20.0989	16.8953	22.0372
gene11127	CCDC112	5.73709	5.05402	4.40891	9.24859	11.265	11.5584	11.7502	9.6515	10.8051	2.14847	12.701	6.87806	16.8794
gene1113	LOC101119949	0.933908	0.752958	0.456996	2.2461	1.2232	1.40786	1.24155	0.59641	1.1444	0	1.14613	0.809384	0.82006
gene11132	FEM1C	24.2719	40.5151	47.0753	43.1968	35.6039	37.5625	30.864	37.286	29.6315	10.5808	33.501	31.5085	41.8763
gene11136	LOC105601870	6.23145	14.8092	10.2401	17.0615	11.4705	11.7731	9.8855	12.9969	8.5594	4.83122	11.0936	7.36695	12.0075
gene11137	TMED7	82.5216	91.2184	119.858	103.913	88.5736	76.0938	99.7149	79.5238	84.4918	42.8228	89.313	90.5657	86.851
gene11138	CDO1	54.5677	34.1743	43.2905	26.4976	45.6959	30.0246	26.8351	28.6464	40.8816	9.20893	55.2524	28.4048	13.1295
gene11139	ATG12	27.5737	37.5088	34.914	49.1575	32.4557	44.1088	43.0209	33.6857	30.0137	15.0564	42.6483	29.3406	48.1396
gene11141	AP3S1	58.0644	65.7636	58.5812	112.818	118.258	129.026	132.189	95.3447	95.5537	35.5422	107.766	144.256	143.604
gene11142	LVRN	2.78114	4.24189	4.40533	5.8151	8.12419	8.6384	5.13909	13.5754	10.0948	4.9475	19.7584	4.27179	14.2245
gene11143	ARL14EPL	1.12591	4.33194	1.34094	16.4679	15.912	14.6393	5.38649	22.969	16.773	4.38257	36.4987	7.32838	20.4962
gene11144	KIAA1191	41.4129	51.5729	55.7471	64.0383	38.9983	40.1407	30.112	43.221	38.2822	33.5252	51.9736	31.8085	58.1947
gene11145	SIMC1	4.32271	9.36015	3.14939	15.5945	11.2815	17.2686	11.362	15.2751	12.4479	3.9664	19.5349	12.8981	26.516
gene11146	LOC106990212	2.28828	4.22028	2.49934	8.01134	8.69343	11.9575	8.65425	8.1545	10.6943	0.38744	12.9853	8.74316	16.9648
gene11148	THOC3	17.832	19.4094	16.3116	15.3825	14.0006	15.7879	17.3093	13.9448	13.6114	15.981	12.3367	9.46223	16.554
gene11149	CPLX2	0	0	0	0	0.207728	0	0.379522	0	0.437278	0.184471	0	0.35345	0.626696
gene11150	HRH2	0.16043	0.531243	0.451401	0.175153	0.268494	0.217285	0.0350387	0.245462	0.0565193	0	0.466157	0.171316	0.115717
gene11151	SFXN1	111.646	301.717	165.966	399.48	310.413	342.516	195.746	451.723	394.414	167.171	435.814	369.785	565.283
gene11152	DRD1	0.0152529	0.363656	0.286112	0.44407	0.204216	0.363586	0.0133252	0.224037	0.128965	0	0.278581	0.238888	0.330054
gene11157	GCNT4	6.10491	10.7167	9.15861	27.0736	14.6779	22.0871	14.5222	16.7456	7.15189	1.47576	13.6432	11.9387	16.871
gene11159	ANKRD31	1.99221	2.99263	1.37452	7.70011	6.63421	9.18016	7.45517	4.92371	7.15297	0.86216	15.183	11.9329	14.2485
gene11160	HMGCR	259.601	150.182	317.948	206.527	166.58	155.577	164.328	137.621	53.0882	13.7964	259.307	121.452	158.568
gene11161	COL4A3BP	31.7288	36.0552	39.7066	57.902	51.1842	66.5208	53.8463	70.2643	56.2474	8.57608	78.8888	67.8291	83.2436
gene11162	POLK	3.71335	9.86031	7.19655	15.9859	14.7266	17.81	16.0204	13.9157	13.4913	1.30778	14.4058	16.4125	18.4823
gene11163	ANKDD1B	0.244265	0.215694	0.15273	0.888938	0.63591	1.2351	0.604618	0.597971	0.803174	0.12101	0.473169	0.289822	1.4095
gene11164	LOC101109617	0	0	0	0	0	0	0	0	0	0	0	0	0
gene11165	LOC101109881	0	0	0	0	0	0	0	0	0	0	0	0	0
gene11166	POC5	7.1146	11.7872	8.43333	14.7085	11.4544	14.3127	13.4432	12.1974	11.1689	2.47985	15.2376	9.89884	17.5849
gene11167	SV2C	0.0855825	0.0529003	0.0285396	0.0664436	0.0763892	0.0803655	0.109657	0.349182	0.160803	0.0508774	0.208413	0.1381	0.172844
gene11168	IQGAP2	12.0205	18.3189	12.7686	19.3408	19.7496	22.1266	13.4259	30.7327	37.4902	5.30195	37.3984	25.7839	44.8681
gene11169	F2RL2	0	0	0	0	0	0	0	0	0	0	0	0	0
gene11170	F2R	23.6961	39.7176	42.7011	29.1711	22.9567	18.8776	18.6852	12.7516	17.0626	4.38406	22.2089	16.3602	20.3977
gene11172	F2RL1	23.4129	34.1455	42.1073	27.4824	20.7687	17.9639	17.2305	17.4175	17.2312	10.0824	18.5169	16.0199	18.6897
gene11173	S100Z	0.25842	0.55622	0.282767	0.517248	0.216244	0.630002	0.705502	0.751239	0.591767	0.360062	0.321807	0.321948	1.11838
gene11175	CRHBP	0.60434	0.32019	0.151149	2.55122	0.87656	1.3751	1.16152	0.887667	1.02196	0	0.501717	1.20465	1.65644
gene11176	LOC101106776	2.25869	4.44362	6.27219	5.94735	5.18841	6.8381	8.21215	2.5614	4.02548	0.271513	4.52241	4.9185	4.02504
gene11177	AGGF1	23.2628	25.9617	27.3073	38.9288	29.5699	39.4708	33.8281	33.0265	30.7238	11.1994	42.9251	26.5265	38.7594
gene11178	ZBED3	2.24173	4.83369	3.12931	4.4775	5.49671	5.9876	4.37227	4.37112	7.42003	0.154962	10.4739	4.34231	10.5289
gene11179	PDE8B	4.68404	13.5297	5.08123	31.5254	17.2052	30.971	20.2138	35.7816	30.1804	3.52267	39.8235	26.1745	38.6093
gene11181	WDR41	28.3946	45.595	28.5048	60.0794	46.0881	60.5654	52.7908	69.1181	57.2052	40.9545	68.3497	54.5479	76.8289
gene11182	LOC106991252	0	0	0	0	0	0	0	0	0	0	0	0	0
gene11183	OTP	0.0595095	0	0	0.0866276	0.0663963	0.128958	0.155966	0.0728407	0.167721	0.0442218	0	0.25419	0.257543
gene11184	TBCA	257.633	176.08	152.885	307.816	444.733	437.072	488.532	417.061	444.753	230.524	413.246	644.722	476.714
gene11186	AP3B1	30.8596	52.2862	37.0767	80.7377	79.7555	85.1896	73.4606	84.0956	76.1244	13.4615	74.6415	80.3174	90.7819
gene11188	SCAMP1	37.7057	45.9066	56.7553	80.3801	86.2691	83.6022	89.2018	85.8397	85.8858	18.2669	108.413	113.677	133.581
gene11190	LHFPL2	0.242521	0.803074	0.606558	0.686458	0.390847	0.890511	0.423741	0.725633	0.531624	0.100121	1.02906	0.55632	0.913515
gene11193	ARSB	9.00029	28.2631	17.7703	16.2672	13.8665	10.4228	9.05016	19.3344	14.1302	7.9001	17.1504	15.6313	23.375
gene11194	DMGDH	0.30217	0.584963	0.0872012	0.913568	1.14108	0.982212	0.446737	0.881977	0.687856	0.293634	1.15781	0.761178	1.47537
gene11195	LOC101108575	0	0	0	0	0	0	0	0	0	0	0	0	0
gene11197	BHMT	0.618563	0.344975	0.447834	1.37435	0.10897	1.02297	0.426622	1.71351	1.00931	0.604812	1.5676	1.43695	2.11341
gene11198	JMY	30.0396	48.8503	55.3281	48.8094	37.5087	49.1169	39.9297	40.016	35.4662	9.64873	41.6172	41.5046	46.8859
gene11201	HOMER1	3.25801	6.50457	5.01101	11.5018	7.48235	11.6274	7.38572	6.22921	7.69941	1.70533	5.63658	7.11899	5.66053
gene11202	PAPD4	27.9508	43.3845	29.7622	71.5059	75.8464	96.0382	79.0402	69.8764	74.4308	17.9942	69.0556	86.5167	100.861
gene11203	CMYA5	2.60264	4.301	2.97782	5.91574	6.52128	9.30757	4.8483	6.36534	4.32628	0.647116	7.87488	6.08737	8.64466
gene11204	MTX3	11.7588	20.8819	12.0571	30.2042	20.2791	28.5522	24.7001	21.45	17.718	8.35077	22.012	17.5307	25.7502
gene11205	THBS4	16.716	15.5423	10.6573	6.98654	7.5742	4.33026	4.16101	10.9004	6.37762	6.5092	13.1503	4.00136	8.58215
gene11206	SERINC5	42.6537	61.5523	59.9557	72.4004	52.8538	67.158	53.389	61.7474	39.175	23.321	42.7956	40.336	51.6204
gene11207	GNPNAT1	12.0385	21.1971	17.0377	27.0736	28.2708	29.5634	29.221	24.0442	30.78	11.9189	29.504	28.6359	34.0052
gene11208	STYX	11.7281	20.3299	15.8725	30.0346	29.5707	35.3508	36.6849	22.0036	26.475	6.30528	27.6894	33.5563	34.4425
gene11210	PSMC6	98.3552	118.515	97.0878	209.116	190.137	240.784	272.499	166.492	185.095	48.6174	174.946	252.708	222.379
gene11211	ERO1A	9.56184	17.144	18.9734	26.474	15.7129	19.6641	15.1136	21.9196	14.1884	4.34797	29.019	16.9682	28.6838
gene11212	GPR137C	1.72483	2.67153	0.80016	10.7925	9.11004	11.9819	8.91955	5.72074	4.78284	0.558173	6.5823	5.54541	6.18042
gene11213	TXNDC16	2.59701	9.21773	4.61772	14.0881	10.0509	15.5423	13.9141	7.07776	7.205	0.557846	9.97155	8.83965	10.8587
gene11214	PTGER2	2.03061	8.06891	9.1228	11.6048	4.05571	11.3812	8.51948	4.29593	3.992	0.707905	4.16245	2.2844	2.89317
gene11215	ANKDD1A	0	0.320314	0.120966	3.02746	1.07926	5.34531	1.09859	1.95363	0.749727	0.143764	1.84704	0.895228	1.32567
gene11216	SPG21	16.8503	18.2345	20.6311	23.9196	19.6113	22.5056	22.9759	22.2966	17.6926	6.95641	28.7459	18.6287	22.7192
gene11217	MTFMT	22.7237	35.3687	20.9531	70.984	46.8594	85.4562	60.83	65.6935	52.581	36.0061	65.7706	55.4552	83.993
gene11218	SLC51B	3.3975	12.0539	13.2771	4.68076	4.87372	5.19315	5.03519	12.4758	15.2181	4.10263	15.7146	4.57823	19.2546
gene11219	RASL12	23.996	37.6055	17.7669	11.6551	14.0757	11.8673	7.16074	18.6989	15.267	4.80215	16.0159	8.76128	18.919
gene11220	KBTBD13	0	0	0	0	0	0	0	0	0	0	0	0	0
gene11221	UBAP1L	0.0213516	0.0659893	0	0.0725231	0.0238225	0.123385	0.0310886	0.365886	0.230679	0.0370217	0.449056	0.304005	0.47229
gene11222	PDCD7	12.2282	15.3569	10.9198	14.3919	12.3371	17.337	11.4215	11.2854	12.0761	7.5885	14.7687	8.79793	13.1129
gene11224	CLPX	36.5068	53.8818	59.4603	82.1136	63.1664	83.9112	82.0127	67.9522	50.9611	17.035	75.8973	72.6624	82.2413
gene11225	CILP	6.37698	11.9765	19.3159	5.04722	5.5524	5.39208	4.14562	6.12461	7.58767	3.19286	9.61745	7.82122	9.33665
gene11226	PARP16	17.6713	27.7612	26.5868	23.0918	14.4587	16.7129	12.3025	19.8527	16.756	30.1112	24.9741	17.3588	29.3262
gene11227	IGDCC3	1.56798	1.46446	0.829573	3.48228	1.65972	3.41964	1.78252	1.42713	1.57221	2.89053	1.03471	2.37561	1.65297
gene11228	IGDCC4	1.87789	3.19442	2.89671	3.17768	2.83971	2.04505	1.66555	2.99865	3.94933	1.13338	3.21299	2.22587	2.80528
gene11229	DPP8	19.1922	39.0224	34.6564	62.7871	45.2938	64.1777	47.5032	52.4727	40.4919	11.9289	68.0722	47.7818	77.8163
gene11230	HACD3	51.6185	67.6173	67.1171	75.8506	61.7413	75.4603	57.416	66.739	48.9709	24.6306	71.5344	56.5388	46.5254
gene11231	VWA9	7.39727	14.1662	10.8257	14.902	10.7319	10.8438	12.2245	13.1191	8.45553	6.12662	10.4951	6.09763	9.21753
gene11232	SLC24A1	0.611013	1.04843	0.434142	2.6077	1.46415	2.48265	1.75909	3.17854	2.72009	0.706868	3.33176	3.5886	3.48569
gene11233	DENND4A	4.37538	12.146	10.9303	13.8694	13.4932	18.4757	15.4058	21.5348	24.1012	5.05177	24.9176	24.6859	50.2147
gene11236	RAB11A	168.218	185.493	210.949	178.605	139.454	126.976	157.055	151.074	128.857	85.4166	189.424	153.037	162.695
gene11238	MEGF11	2.21562	4.77218	2.67085	6.58128	4.22026	5.94755	4.08047	4.00686	3.67074	1.7651	5.7833	4.74613	5.45662
gene11239	DIS3L	14.8037	24.3917	23.1352	21.0288	13.4567	19.7131	14.0192	19.1625	14.4996	8.87396	25.1454	13.413	24.5257
gene1124	LOC101120207	0.305132	0.454682	0.858547	2.60955	0.638332	2.10766	1.03296	1.07378	1.02123	0.0566863	1.13993	0.760286	0.715292
gene11240	TIPIN	18.9497	28.4464	22.5961	46.5322	36.2202	45.2124	30.3338	30.7858	28.1604	25.4607	43.2865	27.6893	32.6383
gene11241	MAP2K1	16.6109	42.3825	26.5121	53.5784	37.554	53.6152	35.8588	60.0328	47.9246	8.60804	65.0316	48.9194	121.389
gene11242	SNAPC5	14.7015	27.6901	15.6466	34.1504	20.1255	27.1701	21.4059	27.0562	17.9256	17.8593	21.294	13.7321	26.0215
gene11243	RPL4	3568.36	2906.18	2936.55	3993.93	3515.99	4242.35	4527.14	3650.11	2794.44	4354	3537.25	2295.04	2480.13
gene11244	ZWILCH	4.77768	15.2302	6.57494	25.1572	14.742	20.459	15.3974	19.6145	13.0788	2.20833	18.1429	11.3917	21.8308
gene11245	LCTL	1.29027	0.646658	0.654131	1.82748	1.78976	1.96479	1.18814	1.96348	1.1794	1.58074	3.30037	1.7378	4.77909
gene11246	SMAD6	37.2091	58.1902	32.7312	68.7102	45.6537	68.023	43.9699	42.2529	47.0443	20.2941	49.9254	26.6378	42.5405
gene11248	SMAD3	7.27349	15.0756	9.48538	14.8375	10.1921	12.3678	8.15952	15.8385	10.5733	7.57426	16.1205	8.83824	17.3063
gene11249	AAGAB	19.1588	27.3987	24.245	29.7227	24.9954	26.424	23.2391	34.0549	22.427	11.174	27.185	19.9969	33.9697
gene1125	FCGR1A	3.66712	8.4068	6.64358	10.1289	11.0156	10.4937	6.53054	7.42348	13.5817	20.7174	9.60159	9.17068	18.5155
gene11251	IQCH	0.390671	0.241482	0.211703	0.549741	0.435882	0.522066	0.341298	0.589766	0.458776	0.677389	0.929751	0.797277	0.789008
gene11253	C7H15orf61	11.5645	10.5226	8.42551	20.6403	10.3222	9.91521	9.66367	10.4625	14.0292	8.14524	23.0417	7.44529	23.2108
gene11254	MAP2K5	38.5048	61.801	32.6549	109.592	103.114	137.965	84.1903	143.59	119.556	31.5491	151.84	133.683	138.037
gene11257	SKOR1	0	0.0485422	0	0.0266743	0.0204447	0	0.0160083	0	0	0	0.091275	0	0.158605
gene11258	PIAS1	53.0307	80.8213	57.1227	130.213	129.942	164.251	135.469	146.133	112.379	16.1691	155.312	147.964	157.343
gene11259	CALML4	9.82994	10.283	7.71781	16.342	12.7435	14.1305	9.09994	18.0822	16.5283	30.8581	22.8593	13.5983	20.7068
gene1126	LOC101120455	21.9179	14.1009	28.1921	33.182	28.2274	28.9051	21.5551	24.3751	16.061	19.2656	28.2819	22.2906	19.3325
gene11260	CLN6	13.0507	17.4672	13.4151	14.4224	9.75814	13.4742	6.32743	12.7125	7.99187	1.37092	14.1814	7.00459	14.9825
gene11262	FEM1B	35.8004	46.1163	52.7067	64.8795	44.2297	65.1126	59.155	46.1033	30.2593	15.398	52.9865	43.0058	44.2558
gene11263	ITGA11	4.31851	10.5062	6.09319	13.1777	7.85252	8.75806	6.04957	9.55475	10.6454	4.78091	15.156	4.96558	16.0922
gene11264	CORO2B	9.5097	18.2948	9.32899	22.3642	17.9858	23.5888	12.4376	31.6654	33.1252	8.69959	38.0793	16.5634	49.5466
gene11266	ANP32A	22.3184	27.3345	18.1987	42.1464	35.2028	43.5611	33.0127	43.1103	30.8909	37.7136	39.5445	23.3322	39.1647
gene11267	LOC101106331	0.595665	1.38072	0.512116	2.38454	1.74457	2.21859	1.6262	2.27845	2.833	0.11066	2.16351	2.3323	4.4039
gene11269	NOX5	3.43757	7.56638	9.73547	5.24934	4.41821	5.4409	3.93056	4.04264	5.01042	1.10193	14.8008	5.66218	10.55
gene1127	LOC101120877	0.58393	0.309377	0.292089	0.595016	0.781807	0.949042	0.918238	1.07211	1.56345	0.60749	0.290864	0.415702	0.168474
gene11271	GLCE	16.8061	23.517	19.9181	32.733	36.7702	35.0614	29.5689	29.7741	36.5726	9.02493	28.9935	40.4702	49.2825
gene11272	PAQR5	13.1402	32.1988	20.4698	27.1345	20.0435	33.0107	14.825	29.5483	23.4902	3.85002	23.345	17.1054	32.4687
gene11273	KIF23	9.62413	16.4415	9.84702	24.9151	15.5984	26.1881	19.666	17.4024	14.076	6.28486	21.3668	14.6631	30.2916
gene11275	RPLP1	9949.41	7318.93	7940.84	5388.34	6614.86	5064.3	6451.48	3369.84	6166.13	7999.23	5589.71	6388.95	4326.74
gene1128	LOC101115753	0	0	0.167042	0.388895	0	0.434197	0	0.163501	0	0	0.221789	0.570564	0
gene11280	TLE3	66.0012	82.3372	69.4895	67.5858	39.5964	52.2103	36.974	59.3422	36.4385	26.6649	48.9337	25.5653	47.3831
gene11282	UACA	69.2851	84.7832	97.2667	128.502	110.516	137.118	111.682	116.693	108.414	45.7019	121.867	66.7522	124.02
gene11283	LARP6	3.94399	5.35751	5.98782	3.77858	4.03488	2.67596	2.58691	2.77621	4.29712	3.2117	4.1216	1.25586	2.67209
gene11285	THAP10	0.211844	0.0935325	0.264918	0	0.11818	0.0765119	0.0308452	0	0.049755	0.104948	0.0586238	0.301625	0.050934
gene11286	LRRC49	1.66848	1.82748	2.04635	3.26952	4.04531	3.66777	3.91032	3.88812	3.7981	0.488788	3.67598	4.70548	8.05392
gene11287	THSD4	8.96612	15.4226	4.89966	45.78	36.1984	59.8796	44.1168	51.1451	23.7382	2.48256	56.092	40.3441	28.6949
gene11289	NR2E3	0.224233	0.396008	0.149552	0.565784	0.166788	0.453522	0.182834	0.292762	0.147461	0.177737	0.347491	0.234127	0.539125
gene1129	LOC101121387	0	0	0.134908	0	0	0	0	0	0	0	0.179123	0	0
gene11290	MYO9A	5.17758	9.65863	7.01025	15.9744	15.0408	18.5925	13.2008	16.3005	15.3719	1.86518	19.2822	19.3083	16.9503
gene11293	SENP8	11.811	11.416	11.6762	29.5652	31.2972	30.5233	28.201	29.9393	24.1787	21.3193	29.4161	33.2922	28.7234
gene11294	GRAMD2	4.92839	5.05681	4.05809	9.22039	6.40873	6.73136	4.4723	5.56514	1.61399	1.30244	6.2237	5.75696	7.66037
gene11295	LOC101110145	102.929	125.812	119.07	71.811	66.0909	43.8158	42.1227	95.3569	80.4774	141.272	83.8871	44.7516	93.0868
gene11296	CELF6	2.24747	1.91371	2.33374	1.0516	1.50006	1.43501	0.911594	2.25971	1.58356	0.283322	2.59884	1.11427	1.04213
gene11297	HEXA	66.201	61.7071	61.7348	62.175	43.4175	51.0717	45.2141	55.5383	50.2586	102.665	68.4475	41.8612	64.439
gene113	INPP5D	3.37266	9.76766	4.88707	11.3777	9.69112	13.6167	7.22574	17.2663	17.521	4.04777	24.2218	18.7316	28.3812
gene1130	LOC101121643	0.476206	0.360433	0.170146	0.69321	0.607218	0.589685	0.594318	0.249808	0.2876	1.21327	1.01659	0.387443	0.883245
gene11300	LOC101116319	0.446535	2.18839	0.670086	5.85016	0.548031	3.72545	1.63842	10.1661	4.59356	0.530915	4.9675	1.52587	6.2484
gene11301	LOC105608556	0	0	0	0	0	0	0	0	0	0	0	0	0
gene11302	ARIH1	16.5996	31.0669	23.5281	42.4107	31.3048	57.3898	43.3268	48.9667	35.912	6.48715	31.794	42.9792	55.2114
gene11304	BBS4	20.3876	29.9144	23.4613	44.5689	30.4194	41.3977	29.3151	44.5658	33.4346	24.2889	47.2589	31.5468	49.3953
gene11305	ADPGK	6.434	12.7318	9.16069	12.4879	8.59122	11.0029	7.28003	14.5172	11.6702	8.6118	13.3	9.97014	16.5503
gene11306	NEO1	23.829	41.9788	26.9158	41.015	47.1645	60.8695	51.2117	43.1093	45.0982	6.94077	39.7468	37.1974	35.1247
gene11307	HCN4	0.0497101	0.276542	0.161626	0.0723626	0.177481	0.118495	0.0521132	0.0973537	0.350256	0.450665	0.412689	0.113244	0.731453
gene11309	REC114	4.18233	4.70873	2.44072	6.89994	8.01053	11.7066	6.45497	11.3477	9.13525	3.4705	9.02754	12.0089	17.5973
gene1131	LOC101116011	0.370077	0.0490184	0.138838	0.484847	0.495485	1.32324	0.355637	0.72477	0.208604	0	0.122894	0.526918	0.320321
gene11310	NPTN	94.3685	124.717	115.81	115.349	102.974	110.616	105.548	115.573	105.891	27.9097	115.826	98.0513	137.802
gene11311	CD276	8.20817	18.6905	15.3844	19.5285	12.9943	13.868	7.62224	17.0287	15.5159	3.01284	21.8455	9.59283	28.2693
gene11313	LOC105608558	0	0	0	0	0	0	0	0	0	0	0	0	0
gene11314	C7H15orf59	3.0596	4.33206	5.01353	3.07161	4.1788	2.00049	2.25816	2.13078	3.71687	5.9584	5.7808	2.17814	4.03324
gene11315	TBC1D21	0	0.501972	0.11848	0.206878	0.211417	0.359297	0.455237	0.115969	0.200269	1.09128	0.314623	0.269795	0.273353
gene11316	SDR39U1	18.5488	20.5292	17.2401	12.6493	13.0977	10.6373	13.2118	15.0849	12.0686	15.8326	12.6244	9.63602	10.4863
gene11317	KHNYN	18.8031	20.5268	19.7639	10.4298	8.6796	7.55014	7.38667	8.31863	8.71119	4.86761	11.1006	7.34918	8.88215
gene11318	CBLN3	0	0	0	0	0	0	0	0	0	0	0	0	0
gene11319	NYNRIN	3.03942	7.21662	6.08377	3.15055	2.43575	2.31445	1.11802	1.93502	2.08189	0.503467	2.92172	1.12543	2.37557
gene1132	LOC101122148	0	0	0	0	0	0	0	0	0	0	0	0	0
gene11320	NFATC4	8.46965	8.69848	6.8378	5.43634	5.22019	4.27545	2.91784	5.15763	5.99747	9.46693	7.6281	3.53146	5.91596
gene11322	RIPK3	8.16074	14.8797	6.02066	15.0109	8.3813	11.617	5.966	17.1358	13.7616	19.766	14.9673	10.6956	21.1808
gene11323	ADCY4	3.79366	8.28591	4.60853	5.61256	4.1463	5.11711	3.05719	6.95578	7.83352	5.38503	9.64121	3.85817	11.8612
gene11324	LTB4R	2.51248	3.56419	3.34643	3.22457	2.18951	3.09278	2.13001	3.31188	2.55591	5.87729	4.24572	1.71455	2.14465
gene11325	LTB4R2	2.94225	1.82679	3.62188	1.60613	1.4362	1.79323	0.963901	1.85695	0.712628	0.375787	2.51896	0.916386	1.52535
gene11326	CIDEB	0.363346	0.683908	0.526119	0.779462	0.576087	1.03603	0.350839	1.02993	0.727615	1.4495	1.17483	1.00744	0.855206
gene11327	NOP9	14.0801	18.0859	13.0623	13.7277	9.86409	10.9984	9.49721	14.2684	10.7975	29.126	15.3318	10.4898	15.4936
gene11328	DHRS1	90.1852	82.835	94.0868	46.8518	49.7071	34.6475	32.0097	48.1611	43.1256	46.3179	55.652	39.2451	31.8943
gene11329	RABGGTA	18.5803	18.1885	18.6585	8.60591	9.21353	6.88009	5.71128	10.3758	8.02245	18.1537	12.6725	6.85862	11.281
gene1133	LOC101122398	48.0975	47.0128	63.4129	33.6694	28.8981	17.9584	21.2073	45.7931	23.0185	10.3957	37.5631	21.7396	32.1746
gene11330	TGM1	65.0919	59.8399	66.7431	40.3509	23.9279	27.9265	29.3143	36.429	14.2542	48.2978	32.6614	19.5604	18.4855
gene11331	TINF2	3.01289	8.17515	5.48696	4.76908	2.7741	2.66231	2.12103	3.29399	2.47325	1.67374	4.12832	2.16571	4.76834
gene11332	GMPR2	5.37119	9.94065	8.51105	9.10409	5.45917	4.46446	5.91367	8.37565	3.52531	0.601437	7.94089	2.51426	4.2457
gene11333	NEDD8	300.86	213.368	207.224	319.478	394.605	348.16	383.544	358.677	402.041	507.344	325.721	415.61	333.336
gene11334	MDP1	5.41093	6.88485	5.06157	9.05504	12.1218	11.0331	13.6602	12.2553	12.5483	16.6851	9.05495	15.5295	13.2759
gene11335	TM9SF1	71.4567	76.2908	75.1012	59.7042	57.2917	46.5892	48.9214	57.4154	49.91	63.4645	55.6104	33.4356	46.8207
gene11336	TSSK4	0	0	0	0	0	0	0	0	0	0	0	0	0
gene11337	IPO4	17.986	31.4713	21.8379	14.9361	8.30533	9.61323	6.90736	10.9091	11.2837	14.2027	9.5203	7.07531	12.3637
gene11338	REC8	0.829603	2.90663	0.635852	1.8699	1.22419	1.88476	1.07544	1.47404	1.20678	2.42615	1.91067	0.609648	2.7796
gene11339	IRF9	20.2547	28.321	18.0604	22.5776	29.0508	17.4156	10.5444	23.558	18.931	44.2727	29.5929	16.045	44.4919
gene1134	LOC101122645	13.2151	14.5594	8.03128	11.1468	4.82295	5.21898	4.85537	12.245	6.61366	18.8144	8.81788	2.81357	8.01756
gene11340	RNF31	10.9664	17.1088	12.9544	11.3567	8.88917	8.41321	5.41711	11.5988	10.968	15.4369	10.9983	6.99485	12.5551
gene11341	PSME2	56.2914	46.0452	42.5343	58.9527	77.0305	61.8049	71.6075	71.1156	67.4515	154.569	60.5033	64.0053	63.7677
gene11342	EMC9	56.8873	21.5463	32.5712	29.2916	40.7051	32.5	30.7223	39.9372	42.0039	128.008	51.833	59.4421	49.2389
gene11343	PSME1	244.072	178.246	200.252	208.954	211.3	175.904	180.533	252.417	195.006	299.682	297.308	183.379	209.112
gene11344	FITM1	13.0753	11.0546	7.56673	19.7424	14.8989	12.6601	7.65575	21.3676	13.7213	15.6599	25.9828	13.9626	30.3001
gene11345	DCAF11	38.509	47.2906	50.7708	28.1487	21.5441	18.8358	18.1187	29.1568	22.2493	15.6163	33.0659	22.2058	28.5302
gene11346	PCK2	29.7476	16.1107	20.7853	12.8588	12.6497	10.5253	12.429	11.0144	8.95794	16.5843	19.099	14.497	18.5389
gene11347	NRL	0.136467	0.216907	0.204787	0.291358	0.213163	0.621025	0.286127	0.200445	0.141026	0.135212	0.332327	0.259069	0.39373
gene11349	CPNE6	0.167218	0.110744	0.313667	0.0912819	0.233212	0.113239	0.0182606	0.153509	0.82475	1.22707	0.277646	0.327368	0.36184
gene1135	LOC101122904	0.848472	1.22601	1.25395	1.57196	1.80726	2.59083	1.07817	1.60502	2.17393	1.77687	0.512286	0.768765	0.890177
gene11350	LRRC16B	1.1113	1.66312	0.433155	0.840366	0.499181	0.781883	0.226951	0.476969	0.427099	0.686386	0.479266	0.534272	0.49968
gene11351	LOC101119050	39.419	23.2987	27.2979	20.2149	25.1707	15.3369	17.8784	28.9259	28.7015	21.4715	31.5522	21.0556	25.8319
gene11354	JPH4	0.86748	0.532471	0.343964	0.400395	0.542951	0.435574	0.277261	0.569752	0.357789	0.251562	0.913391	0.753123	0.518879
gene11355	AP1G2	25.5173	26.5821	23.6498	23.3651	19.0115	15.8413	14.1877	23.7406	17.3717	18.7744	31.5755	15.9344	22.9726
gene11356	THTPA	9.83085	16.6218	16.4295	7.8478	6.46992	5.15411	6.41163	5.54523	5.29883	2.18824	6.31857	2.77364	5.48975
gene11357	ZFHX2	1.77797	2.69143	1.1722	3.60936	3.25222	4.2788	2.53066	4.52278	2.32653	0.907774	4.73943	3.16004	4.6063
gene11358	NGDN	26.4825	28.1313	24.9854	52.4438	53.7115	72.6727	63.4511	55.1377	53.7984	35.4227	55.9869	57.4922	69.9007
gene11359	MYH7	0.0816889	0.121726	0.0638465	0.118914	0.148106	0.0442554	0.0624443	0.337462	0.100726	0.144171	0.237361	0.116309	0.147304
gene1136	BOLA1	36.4697	32.0762	29.6333	23.4734	30.1791	22.4191	31.0022	25.3264	22.3978	50.6797	21.592	25.0988	15.6748
gene11360	LOC101120580	1.47701	1.49191	1.14278	0.464045	1.61237	0.575668	0.5477	1.09254	0.434248	0.600112	1.3056	0.711078	0.935062
gene11361	CMTM5	1.25285	2.09616	2.30886	0.767902	1.83926	0.643016	1.03691	1.61422	1.3009	2.254	1.86124	1.59605	0.380494
gene11362	IL25	7.89936	7.8473	5.82824	6.89943	3.52541	6.50487	2.76041	6.28483	6.34509	2.46542	7.73841	6.18593	4.78611
gene11363	EFS	52.1625	73.8403	46.511	76.6956	41.0528	64.3785	41.8886	71.8545	41.8647	40.2734	70.8751	34.4182	46.8188
gene11364	SLC22A17	4.60046	7.54435	3.37875	8.23059	4.78367	7.27916	3.56337	8.26141	5.90961	12.7365	10.4445	4.06971	6.63655
gene11365	PABPN1	105.823	123.775	64.5928	174.519	114.986	158.748	89.6587	155.954	129.435	159.374	161.277	91.6882	169.493
gene11366	BCL2L2	13.6799	20.2683	18.1461	15.8532	11.8418	14.19	9.1512	14.6378	12.4057	7.18868	17.6554	9.3092	15.2396
gene11367	PPP1R3E	2.25065	2.58921	1.7442	3.06092	2.48753	2.95381	1.84621	3.36272	3.00782	1.09143	4.63171	2.4974	3.36871
gene11368	HOMEZ	15.9596	25.731	22.1665	16.3769	13.0144	12.5914	12.057	11.5822	9.3402	6.82094	13.8288	7.51239	9.24701
gene11369	RNF212B	5.08841	7.09456	3.44474	12.1411	9.26291	15.711	9.85994	9.27222	6.84707	2.04698	12.8319	8.44331	12.0318
gene1137	SV2A	0.277107	0.251133	0.182384	0.148615	0.309175	0.18963	0.229344	0.285629	0.16442	0.216757	0.193728	0.166125	0.399751
gene11371	SLC7A8	70.0599	99.7813	82.2462	89.0277	51.4686	54.0533	42.4262	54.7397	43.8289	31.6305	37.6412	31.4573	64.5452
gene11372	CEBPE	0	0.0741447	0	0.81486	0.187366	0.485218	0.342321	0.411105	0	1.53909	0.278832	0.0797011	0.323009
gene11373	C7H14orf119	44.9416	38.7418	38.3212	58.9489	61.0853	70.4208	64.7382	54.6892	52.5202	29.9304	56.5985	56.0439	48.1682
gene11374	ACIN1	69.0646	113.159	55.2887	125.378	73.1395	111.826	65.4328	108.819	80.0167	75.3132	115.059	67.6768	116.878
gene11376	CDH24	11.8055	20.1711	10.6211	16.7541	7.61809	9.94436	5.28606	9.98823	6.20597	10.0102	8.47968	5.21649	7.52754
gene11377	PSMB11	0.281025	0.248153	0.0585716	0	0	0	0	0	0	0	0.077768	0	0
gene11379	PSMB5	213.317	167.173	199.848	155.703	176.67	133.303	183.798	170.318	155.999	193.735	163.839	193.513	120.19
gene1138	SF3B4	58.451	67.2623	68.1538	38.0042	38.7229	30.2182	23.4846	33.8049	33.5152	29.1007	41.7402	22.7222	35.0358
gene11380	C7H14orf93	4.89333	6.79008	3.84109	8.31038	5.71959	8.67596	5.51481	5.85988	5.20905	2.25889	8.15997	4.99162	6.98265
gene11381	AJUBA	96.1968	140.498	99.7138	108.183	85.7372	72.5973	80.3501	60.5624	26.381	5.73258	57.8604	31.1049	40.0055
gene11382	HAUS4	15.3379	18.7986	13.8956	21.6374	14.0429	18.5446	13.204	15.7765	11.744	12.288	15.5205	10.4411	13.8645
gene11384	PRMT5	32.948	39.5134	31.5763	26.637	22.7044	17.7487	18.8946	23.5062	19.7431	25.4933	18.6629	9.51884	16.8297
gene11385	RBM23	28.1571	41.2878	32.1897	40.1871	25.9705	35.3297	22.4041	34.5233	26.902	21.6347	60.2566	24.2176	45.2779
gene11386	REM2	2.5123	3.93269	2.15506	5.19858	3.15052	4.61183	3.37382	5.5911	3.4818	2.53035	6.17089	4.49346	7.6378
gene11387	LRP10	131.822	124.792	149.949	61.1323	58.0182	38.9647	40.4832	59.1645	50.8313	37.582	69.1818	37.5191	49.5353
gene11388	MMP14	89.2171	104.073	130.321	44.5995	33.983	23.0272	17.844	30.2829	38.1074	7.98992	39.1681	13.9265	34.4973
gene11389	MRPL52	409.28	278.152	287.7	264.867	297.136	230.5	257.758	178.896	221.705	778.728	234.344	160.698	191.106
gene1139	MTMR11	2.33471	4.23425	3.34634	3.97377	3.727	4.12533	2.35344	4.96805	4.20115	2.88266	8.11085	3.0429	5.05203
gene11391	SLC7A7	14.1739	17.1318	14.6239	15.0952	15.0597	15.3881	10.9302	17.2457	18.6237	21.2539	19.7444	16.4497	21.4634
gene11392	LOC101105503	67.163	83.5036	84.682	78.9205	65.5492	62.5313	53.5332	65.8518	61.0318	30.5887	74.21	50.5739	58.7324
gene11393	LOC105615645	0	0.0273826	0	0	0.0230656	0.0223996	0.0270907	0	0.0436988	0	0.0171627	0.0147173	0.0149114
gene11394	LOC101102398	0.0228807	0.136379	0.0143065	0.0999218	0.0638215	0.0619787	0.019989	0.0840192	0.0322433	0	0.0759814	0.130311	0.0330074
gene11395	LOC101102649	0	0.0121231	0	0.0266468	0	0.0495848	0.0079959	0	0	0	0	0	0.0264069
gene11396	LOC101102908	0.0104266	0	0	0	0	0	0.0455445	0	0.0293863	0	0.0692487	0.0148455	0.0150413
gene11397	LOC105613069	0	0.0200459	0.0567773	0	0.0168856	0	0	0.0555736	0.021327	0	0	0.0861926	0
gene11398	ABHD4	22.6886	24.0349	29.7132	17.4612	16.8572	13.0521	14.9161	15.0571	13.4149	12.0808	21.9929	16.897	17.2303
gene114	NEU2	1.84315	3.92467	4.55146	1.86795	1.22345	2.0729	1.01912	4.71199	3.78095	2.27119	2.75042	2.35853	1.78382
gene1140	OTUD7B	12.6159	23.3973	17.3041	22.4564	22.4466	29.9978	18.6997	22.2831	19.3016	5.65548	25.1833	23.1035	25.8567
gene11400	DAD1	235.71	244.322	247.909	424.377	506.253	497.958	516.315	490.275	540.372	240.77	477.871	580.655	492.661
gene11401	LOC101110848	4.94449	13.3015	8.6757	17.5199	15.481	20.7236	10.9497	20.9714	14.2056	6.97828	27.3658	24.5036	21.0115
gene11402	LOC101106528	0	0	0	0	0	0	0	0	0	0	0	0	0
gene11404	LOC105613076	0	0	0	0	0	0	0	0	0	0	0	0	0
gene11405	LOC106990549	0	0	0	0	0	0	0	0	0	0	0	0	0
gene11406	LOC101103651	0	0	0	0	0	0	0	0	0	0	0	0	0
gene11407	LOC105615648	0	0	0	0	0	0	0	0	0	0	0	0	0
gene11408	LOC105615647	0	0	0	0	0	0	0	0	0	0	0	0	0
gene11409	LOC101104668	0	0	0	0	0	0	0	0	0	0	0	0	0
gene1141	VPS45	18.5778	28.1945	25.2754	51.0245	41.1059	57.1623	47.7317	42.7669	41.5091	17.6142	51.0637	39.9637	51.0171
gene11410	LOC101106175	0	0	0	0	0	0	0	0	0	0	0	0	0
gene11411	LOC101107447	0	0	0	0	0	0	0	0	0	0	0	0	0
gene11413	LOC106991273	0	0	0	0	0	0	0	0	0	0	0	0	0
gene11414	LOC101109021	0	0	0	0	0	0	0	0	0	0	0	0	0
gene11415	LOC101109278	0	0	0	0	0	0	0	0	0	0	0	0	0
gene11416	LOC105615646	0	0	0	0	0	0	0	0	0	0	0	0	0
gene11417	LOC105614493	0	0	0	0	0	0	0	0	0	0	0	0	0
gene11418	LOC101110597	0	0	0	0	0	0	0	0	0	0	0	0	0
gene11419	LOC106991256	0.0791946	0	0	0	0.0441797	0	0	0	0	0	0	0.112758	0
gene1142	PLEKHO1	8.41942	8.66152	9.0204	6.05919	7.38835	4.53564	4.84504	8.366	13.4477	25.4478	11.8393	6.59993	12.3504
gene11420	LOC106991272	0	0	0	0	0	0	0	0	0	0	0	0	0.243351
gene11421	LOC106991271	0	0	0	0	0.174061	0.507107	0	0	0	0	0	0	0
gene11422	LOC105614521	0	0	0	0	0	0	0	0	0	0	0	0	0
gene11423	LOC106991270	0	0	0	0	0	0	0	0	0	0	0.228154	0	0
gene11425	LOC101112904	0	0.180809	0	0	0	0	0	0	0	0	0	0	0
gene11426	LOC101113153	0	0	0	0	0	0	0	0	0	0	0	0	0.0920047
gene11427	LOC101113415	0	0	0	0	0	0.138776	0	0	0	0	0	0	0
gene11428	LOC101106775	0	0	0	0	0	0	0	0	0	0	0	0	0
gene11429	LOC101113680	0	0	0	0	0	0	0	0	0	0	0	0	0
gene1143	ANP32E	280.912	319.978	351.815	460.419	366.706	510.083	433.79	276.928	335.204	182.27	319.432	237.699	326.135
gene11430	LOC105613137	0.286193	0	0.357893	0	0	0	0	0	0	0	0	0	0
gene11431	LOC101113937	0	0	0	0	0	0	0	0	0	0	0	0	0
gene11432	LOC101107024	0	0	0	0	0	0	0	0	0	0	0	0	0
gene11433	LOC101107284	0	0	0	0	0	0	0	0	0.0650727	0	0	0	0
gene11434	LOC101107525	0	0	0	0.102619	0	0	0	0.172574	0	0	0	0	0
gene11435	SALL2	1.49337	1.99337	1.6214	0.775186	0.942884	0.464101	0.49556	0.552625	0.538348	0.283885	0.538201	0.18131	0.133601
gene11436	METTL3	17.0231	28.4398	20.967	41.9648	25.1333	33.8308	25.0353	41.7081	24.1898	19.0279	39.7696	21.0709	42.6153
gene11437	TOX4	46.1883	56.2939	53.3444	35.179	35.8633	23.4358	32.7195	30.6046	24.4357	18.2303	30.789	22.6038	29.9574
gene11439	RAB2B	18.2253	27.8963	25.5111	43.6431	37.0137	45.3413	37.7606	47.0763	36.5459	11.5998	50.6484	36.9249	56.0385
gene1144	CA14	0.453755	0.655658	0.0515849	0.720576	0.966508	1.34086	0.360372	1.7672	0.871949	0	0.89039	0.763524	1.96374
gene11440	CHD8	10.3365	18.0533	14.6713	16.1289	12.6168	17.3612	10.688	12.6839	12.2318	4.11434	15.3758	11.4116	16.36
gene11441	SUPT16H	41.2723	57.3925	57.5553	74.0514	57.8236	67.7617	62.707	55.7665	45.5146	19.2561	54.6415	31.943	53.0851
gene11442	RPGRIP1	0.0654542	0.260091	0.102315	0.404945	0.182572	0.478712	0.328797	0.120176	0.253654	0.109439	0.244528	0.209687	0.590146
gene11443	HNRNPC	194.713	232.36	198.783	306.501	295.087	341.64	347.844	212.467	208.6	131.033	196.823	174.529	271.6
gene11444	LOC101114196	0.0411278	0.0272378	0	0	0	0.0445624	0	0.176194	0.0869356	0	0	0	0.0296652
gene11445	TMEM253	0.391812	0.248204	0.319547	0.223183	0.209074	0.239953	0.476235	0.333624	0.0480121	0	0.226281	0.19404	0.270324
gene11446	ZNF219	11.4456	13.5255	10.1632	8.70327	6.67068	6.40873	5.29505	8.30284	5.61684	4.04205	7.33145	3.80074	6.75222
gene11447	ARHGEF40	11.9188	31.3243	13.9929	23.646	18.2499	21.4691	9.53382	19.975	14.5813	9.14656	22.1278	13.7837	26.0086
gene11448	LOC105615652	0.0467715	0.178109	0.0511779	0.391488	0.156552	0.671475	0.326883	0.393588	0.626145	0.0955792	0.514487	0.55772	0.404831
gene11449	LOC101110239	1.39042	3.27625	2.6356	4.38894	1.95957	3.91699	2.35268	4.03082	1.11375	0.391539	3.66951	4.62622	2.40696
gene1145	APH1A	80.4422	82.5429	91.5471	55.6066	64.8205	41.2742	57.2618	46.2358	44.7337	17.9753	59.951	50.8535	46.3565
gene11450	RNASE13	3.87332	6.94416	4.55014	7.46086	6.67877	6.23158	3.82814	4.74101	3.03236	0.290735	5.65165	2.72957	5.36183
gene11451	TPPP2	1.92051	3.39173	0.894731	4.93353	2.89902	4.16177	2.53313	4.88584	2.22877	1.14731	3.7515	3.6459	3.15076
gene11452	NDRG2	87.7005	98.5853	108.091	43.6453	38.3094	33.8938	36.7748	47.1416	34.7805	20.793	64.239	22.6443	32.8191
gene11453	SLC39A2	24.8634	47.4825	24.0024	41.6095	21.1514	58.1027	35.2387	45.3245	9.90365	6.71458	32.3593	17.6582	22.9177
gene11454	METTL17	10.1032	13.7911	10.0022	14.5846	7.9533	14.5655	8.92442	17.2788	14.3165	7.52859	17.8469	11.0285	15.3035
gene11455	RNASE2	0	0	0	0	0	0	0	0.110422	0	0	0.599152	0.128446	0
gene11456	LOC101112572	0	0	0	0	0	0	0	0	0	0	0	0	0
gene11457	LOC101112822	52.3255	103.061	105.29	95.2618	129.045	82.1713	30.099	104.056	126.502	31.9651	70.6326	54.1828	94.8942
gene11458	LOC101113073	0.0338115	0.0895697	0.0845645	0.492191	0.339519	0.0732702	0.147692	0.124158	0.0952939	0	0.22456	0.144423	0.585312
gene11459	LOC101113335	3.28256	3.27434	1.97645	9.14383	2.26076	10.3188	9.31118	25.7444	3.42649	0.481833	10.766	33.5238	18.5322
gene1146	C1H1orf54	19.5963	16.3371	16.5774	26.8481	49.0012	36.7202	25.6795	37.5313	60.1031	42.6583	37.5136	83.0473	53.3791
gene11460	LOC101115713	0	0	0	0	0	0	0	0	0	0	0	0	0
gene11461	LOC101113761	0.482268	0.524717	0.323084	0.401162	0.13452	0.298595	0.436365	0.674633	0.121359	0.0895938	0.200187	0.171664	0.124234
gene11462	RNASE6	4.62952	8.5315	7.86597	8.79021	14.0361	12.4313	7.51738	4.98909	9.92767	7.40395	8.94006	18.27	19.9629
gene11463	LOC105613768	1.24683	1.2752	0.730259	2.02178	1.40873	2.22309	1.00653	0.463639	1.31221	0.363574	0.89098	1.55053	0.683037
gene11464	RNASE4	77.1918	97.5574	100.024	119.89	173.081	118.344	108.191	136.142	166.448	133.682	205.548	130.721	223.719
gene11465	LOC105615654	0	0	0	0	0	0	0	0	0	0	0	0	0
gene11466	LOC101114959	0	0	0	0	0	0	0	0	0	0	0	0	0
gene1147	CIART	8.77306	8.12997	9.56443	13.3322	6.34628	10.9333	9.18033	10.0304	5.38898	4.20292	15.7939	6.17693	16.3182
gene11476	LOC101116235	0	0	0	0	0	0	0	0	0	0	0.0887156	0	0
gene1148	MRPS21	66.2619	66.4138	82.0192	115.151	105.424	125.891	116.927	113.406	100.113	98.2513	107.323	135.538	107.261
gene11485	RNASE12	0.454911	0.4017	0.189626	0.551842	0.592148	0.739351	0.92731	2.22728	0.320529	0	0	1.83516	0.765623
gene11486	RNASE11	0	0	0	0	0	0	0	0	0	0	0	0	0.0183221
gene11487	RNASE9	0	0	0	0.137188	0	0	0.164663	0.115354	0	0	0	0	0
gene11488	LOC105613766	0	0	0	0	0	0	0	0.0621463	0	0	0	0.07229	0.0732436
gene11489	RNASE10	0.147365	0.273268	0.128999	0.214518	0.0328838	0.0638686	0.0901185	0.0360755	0.103833	0.0328523	0.0734046	0.10491	0.148811
gene1149	PRPF3	25.8522	43.3107	22.7432	61.142	34.7721	51.5169	35.5379	47.6582	30.7487	27.5913	45.0168	24.8181	51.5028
gene11490	PNP	32.5092	31.5811	26.4056	44.1856	39.069	42.898	31.3983	32.0381	29.074	60.3453	34.6217	36.14	30.588
gene11491	TMEM55B	24.5227	32.1395	25.2709	22.2237	17.0746	19.2587	16.2367	22.4331	15.4858	7.80981	26.6956	15.5938	26.9177
gene11492	APEX1	113.552	133.091	130.339	162.817	125.125	138.95	157.896	106.209	98.5778	93.6827	95.224	56.9835	77.7582
gene11493	OSGEP	26.4915	36.4347	21.6453	48.027	30.5093	49.9236	30.7752	51.474	36.4728	32.5181	56.8715	22.099	49.5288
gene11495	KLHL33	1.10074	1.71313	1.97873	2.1231	2.01106	1.81881	1.17799	2.02099	1.4736	1.23717	2.46733	0.861983	2.97734
gene11496	LOC106991258	0.702562	2.68006	1.23	2.33179	1.16012	2.19235	0.957482	1.7199	1.34646	0.417661	2.65967	1.76055	2.35133
gene11497	LOC101117767	4.87982	7.12064	5.48196	6.59143	3.97521	5.4828	3.03381	8.83251	5.68178	6.64918	8.05743	4.31515	8.83523
gene11498	PARP2	39.2649	41.9407	40.4611	43.7756	30.6695	47.3288	41.0738	49.8995	34.7147	45.8542	47.1876	32.2515	49.4488
gene115	NGEF	5.7206	7.47717	6.82324	4.01256	3.3493	5.40053	3.03486	13.6807	3.59173	2.79192	14.3886	6.34398	9.31466
gene1150	RPRD2	5.41854	9.41947	5.15584	14.778	14.6803	19.566	12.7876	13.3564	12.3665	0.522038	16.2918	12.2816	17.7849
gene11500	CCNB1IP1	0.0336107	0.0667783	0.0420311	0.195707	0.243752	0.273131	0.20554	0.308551	0.284184	0	0.279033	0.239275	0.145459
gene11501	TTC5	11.6286	14.0435	11.6335	16.4795	12.5164	15.0084	13.8938	16.0337	10.3623	3.43108	15.2191	8.57058	13.7655
gene11502	LOC101118279	0.0190067	0	0	0.0830038	0.0636188	0.020594	0.0498138	0.0232646	0.160705	0	0.157792	0.0270619	0
gene11503	LOC101118533	0	0	0	0	0	0	0	0	0	0	0	0	0
gene11505	LOC101118791	0	0	0	0	0	0	0	0	0	0	0	0	0
gene11506	LOC101116732	0	0	0	0	0	0	0	0	0	0	0	0	0
gene11507	LOC101119053	0	0	0	0	0	0	0	0	0	0	0	0	0
gene11509	LOC101116991	0.642194	1.33668	1.5488	0.200322	1.38185	0.497017	0.440811	0.898351	1.61603	1.94296	1.37094	1.43685	3.50716
gene11510	LOC105601958	0.568141	0.423297	0.532858	0.723659	0.277327	0.654061	0.434296	0.260781	0.100078	0	0.0589582	0.404461	0.307347
gene11512	LOC101119313	0	0	0	0	0.065396	0	0.153616	0	0	0	0	0.166907	0
gene11513	LOC101119568	0	0	0	0	0	0	0	0	0	0	0	0	0
gene11514	LOC101119827	0	0	0	0	0	0	0.0580984	0	0	0	0	0	0
gene11515	LOC101120088	0	0	0	0.09903	0.0759022	0.589685	0.178295	0	0.2876	0.252765	0.112955	0.193721	0.490692
gene11516	LOC101120336	0	0	0	0	0	0	0	0	0	0	0.110068	0	0
gene11517	LOC101120583	0.0498774	0	0.0623731	0	0.0556494	0	0	0.122102	0.140574	0	0	0	0
gene11518	LOC101120840	0	0	0	0	0	0	0	0	0	0	0	0	0
gene11519	LOC101121100	0	0	0	0	0	0	0	0	0	0	0	0	0
gene11520	LOC101121354	0	0	0	0	0	0	0	0	0	0	0	0	0
gene11521	LOC101121608	0	0	0	0	0	0	0	0	0	0	0	0	0
gene11522	LOC101121860	0	0	0	0	0	0	0	0	0	0	0	0	0
gene11523	LOC101122113	0	0	0	0	0	0	0	0	0	0	0	0	0
gene11524	LOC101122362	0	0	0	0	0	0	0	0	0	0	0	0	0
gene11526	LOC101122866	0	0	0	0	0	0	0	0	0	0	0	0	0.0860121
gene11527	LOC101123127	0	0	0	0	0	0	0	0	0	0.0492609	0	0	0
gene11528	LOC101117251	0	0	0	0	0	0	0	0	0	0	0	0	0
gene11529	LOC101123383	0	0	0	0	0	0	0	0	0	0	0	0	0
gene1153	TARS2	14.3551	18.5207	12.7892	15.5652	11.4279	13.0317	9.7209	20.0214	13.2966	23.9064	16.079	9.76649	18.5369
gene11530	LOC101117508	0	0	0	0	0	0	0	0	0	0	0	0	0
gene11531	LOC101123637	0	0	0	0	0	0	0	0	0	0	0	0	0
gene11532	LOC101102066	0	0	0	0	0	0	0	0	0	0	0	0.200515	0
gene11533	LOC101117766	0	0	0	0	0	0	0	0	0	0	0	0	0
gene11534	LOC101102314	0	0	0	0	0	0	0	0	0	0	0	0	0
gene11536	LOC101102567	0	0	0	0	0	0	0	0	0	0	0	0	0
gene11538	LOC101118026	0	0	0	0	0	0	0	0	0	0	0	0	0
gene11539	LOC101118278	0	0	0	0	0	0	0	0	0	0	0	0	0
gene1154	ECM1	59.8583	48.1573	62.6862	31.8575	19.1655	18.2315	13.4109	59.5084	59.7987	44.0372	67.3082	27.1584	54.0199
gene11540	LOC101103070	0	0	0	0	0	0	0	0	0	0	0	0	0
gene11541	LOC101118532	0	0	0	0	0	0	0	0	0	0	0	0	0
gene11542	LOC101103325	0	0	0	0	0	0	0	0	0	0	0	0	0
gene11543	LOC106990620	0	0	0	0	0	0	0	0	0	0	0	0	0
gene11544	LOC101103819	0	0	0	0	0	0	0	0	0	0	0	0	0
gene11545	LOC101118790	0	0	0	0	0	0	0	0	0	0	0	0	0
gene11546	LOC101104071	0	0	0	0	0	0	0	0	0	0	0	0	0
gene11547	LOC101104321	0	0	0	0	0	0	0	0	0	0	0	0	0
gene11548	LOC105613619	0	0	0	0	0	0	0	0	0	0	0	0	0
gene11549	LOC105613625	0	0	0	0	0	0	0.0910127	0	0.146808	0.0774159	0	0.0741653	0.0751436
gene11550	LOC101119051	0	0	0	0	0	0	0.0191749	0	0	0	0	0	0
gene11552	LOC101105081	0	0	0	0	0	0	0	0	0	0	0	0	0
gene11553	LOC101105334	0	0	0	0	0	0	0.0528475	0	0	0	0	0	0
gene11554	LOC101105575	0	0	0	0	0	0	0	0	0	0	0	0	0
gene11555	LOC105613617	0	0	0	0	0	0	0	0	0	0	0.0845084	0	0
gene11556	LOC101105825	0	0	0	0	0	0	0	0	0	0	0.117447	0	0
gene11558	LOC101119311	0	0	0	0	0	0	0	0	0	0	0	0	0.03386
gene11559	LOC105613338	0	0	0	0	0	0	0.0278017	0	0	0	0	0	0
gene11560	LOC105613337	0	0	0	0	0	0	0	0	0	0	0	0	0
gene11561	LOC105613336	0	0	0	0	0	0	0	0	0	0	0	0	0
gene11562	LOC101106852	0	0	0	0	0	0	0	0	0	0	0.0136189	0.0116784	0
gene11563	LOC101107102	0	0	0	0	0	0	0	0	0	0	0	0	0
gene11566	LOC101119566	0	0	0	0	0	0	0	0	0	0	0	0	0
gene11567	LOC101107872	0	0	0	0	0	0	0	0	0	0	0	0	0
gene11568	LOC101119825	0	0	0	0	0	0	0.0170595	0	0	0	0	0	0
gene11569	LOC101120085	0	0	0	0	0	0	0.0143219	0	0	0	0.0272198	0	0
gene1157	ADAMTSL4	12.0838	18.498	16.9937	11.0355	8.66819	6.53917	3.54627	17.1928	16.82	17.6094	21.1796	8.15274	25.5565
gene11570	LOC101108137	0	0	0	0	0	0	0	0	0	0	0	0	0
gene11571	LOC101120334	0	0	0	0	0	0	0	0	0	0	0	0	0
gene11572	LOC101108395	0	0	0	0	0	0	0	0	0	0	0	0	0
gene11573	LOC101108659	0	0	0	0	0	0	0	0	0	0	0	0	0
gene11574	LOC101120581	0	0	0	0.0964989	0	0	0	0	0	0	0	0	0
gene11575	LOC101108922	0	0	0	0	0	0	0	0	0	0	0	0	0
gene11576	LOC101120837	0	0	0	0	0	0	0	0	0	0	0	0	0
gene11577	LOC101109184	0	0	0	0	0	0	0	0	0	0	0	0	0
gene11578	LOC101109452	0	0	0	0	0	0	0	0	0	0	0	0	0
gene11579	LOC101109710	0	0	0	0	0	0	0	0	0	0	0	0	0
gene1158	MCL1	126.712	169.429	186.707	177.942	124.663	121.165	118.743	148.334	117.275	84.5234	156.778	96.6554	198.436
gene11580	LOC101121098	0	0	0	0	0	0	0	0	0	0	0	0	0
gene11581	LOC101121351	0	0	0	0	0	0	0	0	0	0	0	0	0
gene11582	LOC101109974	0	0	0	0	0	0	0	0	0	0	0	0	0
gene11583	LOC101110242	0	0	0	0	0	0	0	0	0	0	0	0	0
gene11584	LOC101121605	0	0	0	0	0	0	0	0	0	0	0	0	0
gene11585	LPCAT4	42.3444	49.4512	33.471	46.6549	26.9149	32.3098	21.3144	19.7409	26.209	36.8977	24.5565	15.1458	24.949
gene11586	NUTM1	0.0858917	0.113768	0.0767215	0.142894	0.177973	0.159539	0.0964756	0.15019	0.0172912	0.0273542	0.18336	0.139764	0.300915
gene11587	NOP10	44.9771	35.5236	34.514	59.5207	59.4861	65.6673	57.1297	54.6906	44.4655	56.0709	57.8406	44.0457	60.3042
gene11588	SLC12A6	2.79754	7.9015	5.1525	10.5901	6.74434	10.0036	8.11773	9.30941	6.48659	1.91669	10.2673	8.15464	11.0481
gene1159	ENSA	107.654	117.442	122.262	129.617	104.518	99.3211	117.456	111.575	86.8533	93.6013	104.146	81.25	91.5178
gene11590	EMC4	59.8006	57.6783	63.361	82.5404	69.3899	83.585	68.0582	91.829	63.2029	34.2173	82.9538	61.5362	72.8568
gene11591	KATNBL1	3.06956	7.0227	3.46635	14.0098	11.2222	15.2252	12.7472	10.133	11.3951	1.3087	9.51373	14.1179	14.3489
gene11592	EMC7	52.354	57.3232	58.0081	45.9006	45.4827	31.783	45.9021	53.9721	46.6915	31.9731	53.2934	38.1429	51.6036
gene11593	CHRM5	0.289073	0.740254	0.156647	1.2063	0.967577	1.34682	0.782871	1.09687	0.882612	0.100245	1.34392	1.0564	0.820124
gene11594	AVEN	29.668	37.7649	26.4293	52.2429	51.2537	60.1001	49.0501	77.8021	67.7131	34.9365	54.888	49.5656	72.2515
gene11597	RYR3	1.64081	2.77086	1.88713	9.07752	4.54778	6.89073	4.35613	10.9215	5.69897	0.400498	10.2678	8.17952	12.0539
gene11599	LOC101123559	0	0.207158	0	0	0.116333	0.0564868	0.364356	0.0638119	0.0734657	0	0	0.222682	0.376033
gene1160	GOLPH3L	21.9223	37.0529	26.3591	56.423	54.2697	62.9846	52.384	54.7752	44.5262	10.4474	55.1972	40.6503	48.5508
gene11601	FMN1	8.54377	13.1974	11.2178	36.4169	22.8087	44.4815	26.7159	37.7155	32.3868	4.47189	25.9178	20.6017	25.1673
gene11602	GREM1	11.8681	20.8906	28.6672	11.8217	13.2892	12.6894	10.891	21.9384	23.3701	9.15803	42.3209	22.943	38.3521
gene11603	SCG5	0.925376	2.69655	2.39157	2.33491	2.40909	2.40637	1.99412	5.28583	3.82517	2.33801	3.27782	1.40539	3.02585
gene11605	ARHGAP11A	4.62219	8.74186	6.69879	11.8941	7.80499	12.5021	10.1296	7.45591	6.27467	2.52779	5.89199	5.39038	6.45597
gene11606	GJD2	0.0993408	0.0789489	0	0	0.0221674	0	0.086786	0.048638	0	0.280518	0	0.113154	0.0573231
gene11607	ACTC1	7.50298	7.66824	3.12757	4.18004	4.54735	2.60949	3.23691	5.04541	2.34959	5.19692	1.3842	1.25292	2.47208
gene11608	AQR	5.55611	10.2489	7.83714	12.5538	8.04089	10.9217	9.89077	10.2995	8.59819	3.71626	10.341	8.45855	11.0709
gene11612	ZNF770	2.14521	3.07822	3.62158	4.42393	3.92928	4.30007	4.63839	2.56014	4.15666	0.637647	3.02759	2.74893	2.93992
gene11614	DPH6	3.29538	4.37476	3.82262	8.08555	8.70107	8.11863	9.02753	11.608	10.4959	1.27981	10.7204	11.9317	10.9275
gene11623	C7H15orf41	3.94088	7.41472	3.2103	12.4733	15.5857	14.8938	14.7389	15.8793	13.5993	1.87576	16.0376	18.08	11.5435
gene11625	MEIS2	9.39834	15.6058	7.32427	36.5821	50.1503	44.4715	26.8926	40.7077	42.0356	4.43666	53.6746	43.2472	37.0714
gene11629	TMCO5A	0.284976	0.107847	0.0509102	0.0592626	0.0908444	0	0.0355658	0.498309	0.344217	0	0.202787	0.173893	0.352374
gene1163	HORMAD1	0.0201316	0.0799957	0.0503503	0.293055	0.179691	0.196315	0.193461	0.0985659	0.42554	0.0448797	0.534819	0.143318	0.261374
gene11631	SPRED1	11.2864	20.8054	18.9618	24.9132	26.4653	31.7489	28.7928	20.9245	21.2124	3.59373	25.2303	25.4197	32.3294
gene11632	FAM98B	21.6657	20.1236	20.8444	21.7743	25.5949	22.4212	28.6843	20.6489	19.7082	15.0282	23.3882	22.7777	22.4975
gene11633	RASGRP1	24.6782	29.7322	24.7382	42.9245	41.7643	50.4563	49.215	31.6933	35.999	29.4834	46.3466	50.8082	48.8857
gene11635	C7H15orf54	0	0	0	0	0	0	0	0.152079	0	0	0	0	0
gene11636	LOC101106173	0	0	0	0	0	0	0.325143	0	0	0	0.15449	0	0.134225
gene11637	THBS1	20.8886	66.0616	85.6983	56.9064	25.5107	26.4265	26.5427	44.3661	28.528	1.81959	47.4864	31.7597	58.7489
gene11638	FSIP1	1.21609	1.98977	0.626192	1.77025	2.89987	3.53955	1.48944	3.26889	4.9731	0.91254	2.61304	2.66511	6.41527
gene11639	GPR176	1.1551	1.86998	2.65714	4.64999	8.05085	5.88697	3.71255	5.91727	3.49666	2.34194	7.22174	4.62934	10.574
gene1164	CTSS	24.264	44.3309	72.417	86.2487	89.2036	82.5774	66.0264	69.1982	85.0343	68.9778	103.764	147.729	138.485
gene11640	EIF2AK4	17.6465	31.2949	14.9574	35.3949	33.4879	46.5911	29.4467	41.7558	38.6759	5.48729	52.0731	38.2374	67.5399
gene11642	SRP14	163.872	152.02	138.937	283.676	342.068	362.137	389.261	278.271	311.752	132.816	247.216	414.843	294.97
gene11643	BMF	7.15504	10.1733	11.2191	8.80488	6.50166	8.59175	5.40498	8.2726	5.40523	2.06237	11.6811	6.43275	6.67722
gene11644	BUB1B	20.3373	25.7817	18.2454	43.9878	39.1348	51.2441	35.7786	35.2738	28.0558	8.16211	42.6539	29.4487	33.6619
gene11646	PAK6	13.1861	21.4812	13.3099	32.8378	15.7305	26.3494	14.1397	28.7688	14.2637	9.26574	30.6624	12.2765	30.0027
gene11648	ANKRD63	0.0634202	0.168006	0.237927	0.230801	0	0	0.166215	0	0.0446857	0	0	0	0.0457446
gene11649	PLCB2	0.634885	1.75662	1.09388	1.35549	0.724099	0.978353	0.727204	1.13976	0.815149	0.712921	1.9209	0.662899	1.52646
gene11650	INAFM2	16.0546	24.5295	23.1588	22.9606	14.6915	14.8013	17.4705	19.3064	13.0982	13.2908	20.2265	14.2366	16.7607
gene11651	C7H15orf52	3.21967	7.15844	5.70391	3.96151	2.35208	2.3257	1.50684	2.48654	2.21456	0.683586	4.20034	1.80093	4.81053
gene11653	LOC105608915	0	0	0	0.0743945	0	0.221495	0.267882	0	0	0	0.254566	0.0727648	0.294899
gene11654	DISP2	0.00619065	0.00819979	0	0.00901168	0	0	0.0108165	0	0.00872382	0.0644042	0.0205577	0	0.0267916
gene11655	KNSTRN	18.5907	27.9916	23.3475	37.0083	25.3514	30.6021	27.0339	30.8266	16.0658	25.5338	25.3273	14.2528	19.7702
gene11656	IVD	19.5072	30.151	31.8777	28.7808	20.3246	23.3293	17.0162	31.7404	24.5131	2.28882	38.7211	20.0895	39.5241
gene11657	BAHD1	15.2371	20.1337	20.2439	11.7426	7.55119	8.76015	6.70363	11.3403	7.19169	6.62645	9.23289	6.36775	9.65782
gene11658	CHST14	8.49768	13.1446	11.9642	5.44972	6.29861	3.79882	4.07526	4.50966	6.78297	5.29902	5.77202	4.06122	5.95787
gene11659	C7H15orf57	37.6672	33.0446	37.9491	38.7574	39.2427	37.0461	35.5507	35.9932	25.9927	32.3974	33.4779	29.9307	33.4525
gene1166	CTSK	35.7877	47.7469	73.8953	88.2651	99.3974	81.1034	57.243	166.22	240.797	68.1986	216.64	148.173	426.121
gene11660	RPUSD2	5.98438	8.64434	6.62921	8.26556	6.36148	7.6329	6.17488	9.0553	6.27506	7.63347	10.6796	5.16603	10.5023
gene11662	CASC5	2.12767	4.52924	4.18112	4.85786	4.99507	7.23167	7.84445	3.26313	4.56883	1.28933	2.76521	4.45392	3.84582
gene11663	RAD51	8.54894	13.4466	11.5411	19.975	11.137	17.8942	15.7221	12.7531	9.5487	6.11814	10.162	6.98508	9.63483
gene11664	RMDN3	47.7507	22.1281	29.8404	34.8509	27.9446	35.49	22.4553	51.0412	26.6936	14.174	97.1508	60.2338	59.1307
gene11665	GCHFR	37.7366	18.2834	25.4659	22.7677	27.0541	26.1023	21.2293	18.4376	20.0435	30.0703	16.6447	38.7839	18.777
gene11666	DNAJC17	45.8324	39.62	41.1157	61.4639	40.4346	61.3918	35.7207	62.8776	56.5743	105.481	80.368	61.3846	90.6525
gene11667	C7H15orf62	0	0	0	0	0	0	0	0	0	0	0	0	0
gene11668	ZFYVE19	14.1624	19.6046	15.0798	26.3033	14.7535	23.8114	15.1949	17.473	8.78768	27.0222	16.841	6.31144	13.7106
gene11669	PPP1R14D	30.0896	31.1663	29.6922	43.4898	30.4691	34.8428	28.7162	40.3212	24.7178	19.1276	35.1616	20.1011	27.9779
gene1167	ARNT	12.3382	38.2611	32.0836	31.142	25.7005	35.0566	24.1021	25.6024	22.1627	2.38068	24.5745	29.5551	38.9208
gene11670	SPINT1	74.2353	70.7772	72.2678	47.6554	33.582	32.4459	32.4043	37.061	27.9398	35.8817	37.7688	23.4881	29.0084
gene11671	RHOV	60.5392	60.0554	67.6977	32.8144	28.1994	18.596	22.6024	24.0384	14.8002	17.2588	30.6233	16.7772	19.7084
gene11672	VPS18	12.3383	13.9934	13.4429	5.83727	5.97109	4.01062	4.33855	4.26642	5.30307	6.9682	6.93976	3.64524	4.96151
gene11673	DLL4	3.01911	4.70465	5.13022	2.63694	2.31832	1.78956	1.00848	4.13021	7.7332	4.1571	6.28084	2.85732	6.53299
gene11674	CHAC1	149.899	375.576	160.75	92.8854	72.9348	157.936	90.2894	52.74	35.8008	58.8941	77.1474	45.2451	44.7461
gene11675	INO80	14.3411	21.1512	15.9626	15.3479	16.4575	36.0018	18.1893	20.9241	21.7528	11.1437	21.0753	21.8472	27.54
gene11676	EXD1	0.0920195	0.144045	0.115073	0.365324	0.289338	0.716056	0.263094	0.307182	0.377231	0.167842	0.59726	0.416875	0.796476
gene11677	CHP1	18.3359	50.8527	57.8061	43.1035	36.2811	25.3321	27.4233	36.5341	29.3508	2.38115	41.775	29.2327	38.2641
gene11679	OIP5	15.186	18.7527	11.6713	46.9757	33.9752	50.0483	31.9233	28.9469	17.1646	20.8652	29.811	21.5094	34.8005
gene1168	SETDB1	10.5888	23.7629	12.4282	26.9745	14.6158	24.9785	14.1666	21.3669	13.2803	6.93559	24.8149	12.6426	22.3673
gene11680	NUSAP1	25.6509	35.453	28.2825	61.4654	36.9824	47.9142	46.3817	31.5877	20.2117	15.0332	28.3792	13.7742	23.8709
gene11681	NDUFAF1	7.7359	9.0253	6.66491	12.4723	9.7853	13.4013	8.89963	11.8361	8.52462	10.695	13.0312	8.74109	11.6463
gene11683	RTF1	40.4032	38.947	35.5949	31.4603	32.4476	26.9613	30.1774	32.6332	33.8857	18.4335	32.27	18.7231	40.7829
gene11684	ITPKA	1.93437	3.15343	0.930378	2.02163	1.16212	1.88094	1.55991	1.1535	1.04842	3.28031	2.47061	1.27115	2.07498
gene11685	LTK	0.136347	0.252837	0.0454682	0.396959	0.23326	0.226525	0.134997	0.100135	0.115284	0.0135093	0.422591	0.271784	0.0786769
gene11686	RPAP1	9.17386	13.5974	11.3238	10.2619	6.23664	7.97255	4.51007	9.326	5.97051	6.51729	9.83289	3.66677	9.53608
gene11687	TYRO3	48.9203	52.8216	52.0555	33.1235	22.9314	23.7988	22.5801	31.2459	13.1435	17.1961	31.2238	18.2806	18.5945
gene11689	MGA	9.18886	16.2122	11.7864	21.4587	19.003	24.6652	17.4955	21.7528	18.3557	4.79011	21.5082	16.8055	20.9839
gene1169	CERS2	44.549	59.549	53.824	35.9387	29.2018	25.5975	25.4591	33.5385	24.5116	15.8096	33.9854	17.9918	28.5157
gene11692	MAPKBP1	9.43345	13.4013	11.7709	12.5753	8.43553	12.0409	6.61714	12.5111	8.65786	6.94328	15.2156	9.04283	18.1448
gene11693	JMJD7	24.9494	30.0272	18.2924	29.4053	20.277	26.2096	15.3238	23.2527	19.2748	45.7854	21.5539	14.5158	16.6256
gene11694	PLA2G4B	55.0861	56.0572	35.9253	33.8102	16.5457	21.9559	11.8314	41.8566	10.7113	22.7443	35.9503	18.4149	19.9521
gene11695	SPTBN5	3.66738	3.54029	2.06636	3.92098	1.95342	2.83992	1.67435	4.88837	2.44533	6.52442	4.1627	2.38218	3.51206
gene11696	EHD4	14.5435	29.3751	26.3899	22.1893	15.2646	18.8446	15.336	30.0973	48.3136	17.1116	40.0387	27.3781	54.2348
gene11697	PLA2G4E	4.89449	6.5387	8.12878	15.2297	4.31865	11.4574	5.53174	18.299	2.60871	0.719086	21.8071	9.34498	12.7255
gene11698	PLA2G4D	0.161229	0.262838	0.124075	0.613832	0.207563	0.147818	0.173358	3.93177	0.157295	0	1.42088	2.64876	0.787219
gene11699	PLA2G4F	2.34091	3.06541	3.02717	5.03403	1.81046	2.50758	1.48732	7.03305	1.04962	0.296513	4.01931	6.51451	2.30248
gene117	GIGYF2	47.5786	66.3558	54.3487	65.2717	56.9198	69.2706	53.8152	69.4221	55.8009	10.3185	58.8252	51.2431	82.6777
gene1170	FAM63A	85.4819	94.0876	101.511	61.4832	45.4765	44.9368	45.9511	48.7155	32.1182	32.3006	55.5388	40.161	39.0219
gene11700	VPS39	18.0695	25.5992	23.1819	23.8505	15.2063	20.5495	12.6895	21.9701	16.0961	16.121	22.9848	11.5593	25.1986
gene11701	TMEM87A	60.6711	84.1449	74.2287	127.651	109.927	131.191	115.07	126.986	131.346	29.8859	139.059	132.708	156.955
gene11702	GANC	3.6939	5.07462	4.60215	6.13678	6.48082	8.03451	5.14649	10.7236	8.20482	1.48983	11.2633	7.66424	12.9356
gene11703	CAPN3	0.0699928	0.710767	0	0.984918	0.754897	0.808938	0.3465	1.02807	1.08497	0.52012	1.70448	1.22909	3.93786
gene11704	ZNF106	14.0754	21.4608	24.1953	24.1266	17.6414	23.4073	16.8525	23.8392	17.9481	6.76987	23.796	16.2186	26.0259
gene11705	SNAP23	27.0426	40.72	36.2671	77.3453	72.9716	74.9621	71.9205	54.9457	55.9739	13.4846	72.8626	59.9631	76.492
gene11706	LRRC57	19.8851	28.9793	26.3004	46.4307	34.058	47.8165	38.7279	33.6731	27.7411	15.3137	34.7547	28.2061	46.0486
gene11707	HAUS2	11.0478	22.1125	21.3792	35.6082	23.8308	33.5896	27.3363	23.6852	18.4934	5.60578	25.4586	16.1112	27.2062
gene11709	STARD9	2.00677	5.63268	2.36009	7.3301	7.20435	7.53211	4.61867	10.7584	7.29919	2.06691	14.2927	9.07632	16.1748
gene1171	ANXA9	0	0	0	0	0	0	0	0	0	0	0	0	0
gene11710	CDAN1	5.13979	9.05203	4.2909	9.18145	5.67105	7.69789	4.47778	8.38245	5.31685	6.62312	10.8507	4.60166	11.05
gene11711	TTBK2	2.68561	6.01683	4.35689	8.62892	8.65179	11.6789	7.96335	8.23291	7.27929	1.1282	9.69161	9.80923	12.7134
gene11714	UBR1	13.6974	24.6841	19.3587	46.2641	38.7117	51.27	39.4593	42.4171	43.4901	7.48676	45.0396	44.2634	62.2187
gene11716	TMEM62	23.1555	37.9009	34.8471	57.2255	38.2371	46.2911	31.1897	47.3637	35.2361	15.7676	43.2711	27.3279	52.0744
gene11717	CCNDBP1	35.5177	40.1955	38.8601	51.5615	37.0005	45.7176	43.2665	48.4963	33.7324	22.9115	46.7994	34.0822	48.7507
gene11718	EPB42	0.645475	0.920727	0.807185	2.04788	1.93893	2.38506	1.76399	2.04609	2.07575	0.332069	2.6656	1.15468	2.41145
gene11719	LOC101118703	25.5598	37.7952	35.0632	43.2213	40.0109	43.6305	45.7659	38.2306	23.8314	9.82429	26.4329	23.8432	42.9911
gene11720	LOC101111733	0.89693	0.891019	0.841228	0.979241	0.5504	1.02043	0.94029	0.054893	0.126395	0.099977	0.372312	27.5205	0.064695
gene11723	RPL10L	0	0	0	0	0	0	0	0	0	0	0.135992	0	0
gene11724	MDGA2	4.33172	4.92874	1.74201	17.0003	27.6354	19.6422	9.25228	20.2508	18.6623	1.61655	22.4324	9.26487	12.9382
gene11726	LOC101121352	0	0	0	0	0	0	0	0	0	0	0	0	0
gene1173	PRUNE	6.87343	15.992	12.201	16.3387	9.85175	15.5643	9.04086	14.4316	10.2664	2.42949	12.3956	9.41989	12.9607
gene11733	RPS29	96.9053	138.405	65.7665	143.825	264.143	649.23	280.939	378.424	846.321	187.074	485.848	441.91	570.121
gene11734	LRR1	7.12096	10.9498	6.90902	20.7318	12.7851	21.5505	13.6933	15.6791	9.97713	7.81578	14.3377	11.8287	16.8848
gene11735	RPL36AL	1092.58	743.542	761.289	1165.17	1806.87	1756.34	2099.2	1574.58	2016.72	2617.85	1349.71	2341.57	1743.74
gene11736	MGAT2	17.8127	31.9739	28.6657	19.3765	18.8695	14.2379	19.962	16.7097	18.7918	22.0973	17.1717	18.0166	20.3605
gene11737	DNAAF2	7.67494	8.74683	11.2373	10.7068	10.9001	8.09066	10.1832	9.1007	7.90882	5.79834	8.17697	8.65103	7.68104
gene11738	POLE2	15.5099	20.2691	15.1623	39.9258	36.3054	54.7571	38.6274	30.3582	36.2652	10.2677	36.5351	30.0016	36.2276
gene11739	KLHDC1	1.63245	3.74631	1.9277	4.89833	5.14448	6.80907	5.32718	4.0464	3.53717	1.11509	4.59803	4.3443	5.47084
gene1174	BNIPL	47.1128	60.2232	48.3837	88.9684	49.5406	71.8856	52.4067	74.493	28.7391	18.536	76.1892	33.4478	66.4746
gene11740	KLHDC2	48.7816	65.9944	47.2986	120.709	98.1366	130.348	102.578	114.477	71.056	27.3811	95.0663	75.3303	92.8688
gene11741	NEMF	38.9784	41.3753	28.0351	75.5214	93.0241	108.544	94.9033	88.2119	86.7983	8.16614	90.0974	71.7924	112.175
gene11742	ARF6	274.099	366.96	412.354	210.228	206.642	116.241	190.433	119.771	161.315	129.657	158.554	116.324	130.783
gene11745	VCPKMT	16.2917	29.0252	12.5584	62.8845	47.4979	80.13	41.6493	51.7073	39.9557	12.3904	50.3855	42.9733	63.6174
gene11746	SOS2	14.6108	27.152	21.0383	36.6283	32.8482	41.6678	35.1937	35.8574	29.8406	10.8846	36.6778	33.4827	43.1045
gene11747	L2HGDH	10.15	12.675	10.8049	26.7442	19.0989	31.1053	23.2536	22.2604	19.3111	4.07329	21.9048	22.0577	25.2972
gene11748	ATP5S	21.7183	18.7229	26.653	38.2062	33.8833	41.9588	46.8228	26.854	32.6284	13.7592	37.4054	47.1178	42.4821
gene11749	CDKL1	2.003	4.48979	3.93612	11.6309	4.76429	10.9467	6.63406	7.2204	6.57575	1.57022	8.07679	5.51572	8.70024
gene1175	C1H1orf56	1.77848	0.785228	0.741349	2.64646	1.36696	2.65499	1.10487	2.7574	0.83541	0.675485	2.82172	0.956615	1.36833
gene11750	MAP4K5	17.0547	32.5944	23.1636	45.3576	39.8368	50.5266	43.9703	39.5732	38.9349	9.11691	40.6242	40.5045	56.7823
gene11751	ATL1	4.7472	8.51337	5.86981	17.9361	13.8068	19.5632	13.6067	11.5887	14.1311	1.34765	11.3361	15.9484	16.2742
gene11752	SAV1	15.5751	30.1161	32.262	39.609	33.9826	33.6649	27.5855	26.592	36.2053	10.7825	43.4545	27.6724	50.3138
gene11753	NIN	16.4098	32.4035	29.1483	48.0934	42.6084	58.572	40.3896	37.8919	37.2457	7.60881	50.0355	39.0987	53.2295
gene11755	ABHD12B	13.5332	18.9452	14.5536	18.9674	15.3967	10.3318	12.9095	21.7483	21.8669	24.1403	16.7175	10.4144	21.018
gene11756	PYGL	29.6548	66.8575	59.151	48.0416	33.6408	22.8406	30.2091	45.2337	31.4714	17.1735	41.1335	28.0459	48.1699
gene11758	TRIM9	3.75602	7.18168	4.88641	15.1682	11.3892	5.3989	8.20332	17.2775	6.95768	2.22839	9.60611	7.97864	21.0836
gene1176	CDC42SE1	79.7267	121.999	120.551	110.093	76.2837	80.1739	71.212	86.9425	58.6323	49.1389	99.3368	55.144	84.2944
gene11761	TMX1	44.0601	52.0094	52.8828	80.9785	61.3688	74.5031	65.1241	60.0538	56.2879	48.5601	71.6424	63.475	84.0457
gene11763	FRMD6	46.2352	100.938	47.3922	298.111	207.893	428.933	270.342	205.806	234.137	6.85274	196.718	202.346	229.344
gene11765	C7H14orf166	261.028	231.482	210.941	391.088	414.141	490.071	537.403	359.763	436.491	418.057	384.047	487.407	441.105
gene11766	NID2	8.51435	22.8031	18.8211	15.4296	19.059	15.2067	9.50513	17.7186	25.0515	5.47285	25.4334	15.1487	36.2117
gene11768	PTGDR	2.13574	1.90306	3.22924	3.44813	2.01463	3.70255	3.00227	1.85369	0.656654	0.129852	3.38495	1.87981	1.82058
gene11769	LOC105607710	9.19386	8.65082	10.8061	5.48502	5.04483	3.04837	2.58953	8.48621	11.4692	16.24	8.25829	4.00577	13.8427
gene11770	PLEKHO2	3.38152	8.38464	10.1488	5.35563	3.53138	3.25355	1.89066	3.97348	4.26963	1.82933	5.92903	2.77322	9.60016
gene11771	PIF1	0.62817	0.724182	0.276395	0.694283	0.791718	0.74365	0.752033	0.840085	0.737677	1.23614	0.927112	0.513447	0.872626
gene11774	RBPMS2	18.9373	30.4825	21.133	17.3066	30.2247	22.9111	11.0541	43.6567	30.7552	16.3442	51.8884	16.5648	36.3842
gene11775	OAZ2	140.014	153.765	146.89	121.261	109.561	95.7127	100.072	109.092	107.654	90.7187	128.087	99.6468	107.984
gene11776	ZNF609	12.5713	18.5067	12.9294	28.4381	24.6343	36.9808	22.6912	35.4041	27.3944	2.41665	37.0943	33.5017	48.8301
gene11778	TRIP4	25.4837	41.0664	28.323	67.1123	48.6753	73.4914	53.7544	60.2665	55.8855	20.8662	60.3475	47.4578	72.5347
gene11779	KIAA0101	32.6634	40.9659	30.8654	70.2168	74.8226	94.8463	99.8168	35.0427	56.7875	29.6877	29.6017	50.2738	43.6781
gene11781	CSNK1G1	3.4997	7.60657	2.63217	17.3963	14.6234	22.1187	12.9981	19.7266	13.414	1.62482	18.5592	15.2707	22.6146
gene11782	PPIB	585.973	471.597	515.31	415.381	488.642	322.507	443.661	437.294	594.978	703.985	421.607	368.656	378.199
gene11783	SNX22	0.675781	1.49184	0.610338	1.47559	1.54986	1.83054	1.96792	0.735261	0.952307	1.14385	0.6857	0.748363	2.32886
gene11784	SNX1	89.1903	133.571	126.865	89.036	80.6148	71.3408	76.4046	76.4035	79.8435	66.7284	86.236	53.2259	102.919
gene11785	FAM96A	46.22	45.8756	36.0308	96.5543	82.7111	116.94	85.9489	111.385	98.6299	60.3068	97.6728	78.0299	122.096
gene11786	DAPK2	8.70437	21.1727	8.66773	57.8011	20.6823	48.0587	21.0761	24.0379	20.4814	0.778586	24.6229	18.3222	24.6873
gene11787	HERC1	9.46917	16.8042	13.5601	16.9067	14.4552	18.2134	14.2719	18.0845	17.9987	2.8213	19.108	17.0589	20.6372
gene11789	FBXL22	0.944894	1.03198	1.07797	0.84459	1.05424	0.808265	0.448944	1.19715	2.21923	2.59921	1.84413	0.660871	0.669589
gene1179	GABPB2	2.66788	4.39596	5.33802	3.97682	3.04806	5.68885	3.0206	3.56596	2.90238	0.420293	5.97123	3.29713	3.6947
gene11790	USP3	36.9722	54.956	35.5718	113.789	91.7373	144.228	105.634	106.297	101.282	17.2166	111.175	107.507	113.581
gene11791	CA12	62.2047	51.6635	54.8538	97.0101	87.4614	106.227	61.173	156.935	78.4281	7.22259	193.797	140.853	153.258
gene11792	APH1B	3.34466	6.6753	6.35905	7.02781	5.31897	6.54283	5.57948	6.83555	5.41706	1.76567	10.2776	7.69269	10.1957
gene11794	RAB8B	12.6326	25.0902	22.9245	40.2043	35.8111	40.4423	35.6421	35.7055	32.1615	10.5596	33.5641	43.7794	50.7985
gene11797	RPS27L	306.677	236.862	232.475	326.833	463.137	457.822	456.52	404.446	422.872	329.318	465.191	628.931	580.477
gene11798	LACTB	20.6736	19.1682	24.0756	28.8718	34.1666	29.7151	34.7107	30.9194	23.3065	14.7626	33.2534	30.0331	32.3398
gene118	KCNJ13	0	0	0	0	0	0	0	0	0	0	0	0	0
gene11800	TPM1	983.149	1665.16	1321.18	1880.8	1272.26	1395.97	1001.44	1619.05	974.379	848.625	1612.56	1079.43	1363.34
gene11802	TLN2	7.95291	19.9028	9.8034	25.4983	20.6199	30.0944	18.0854	23.507	22.4544	4.70257	18.5881	17.2528	24.3476
gene11805	C2CD4B	0.555069	0.735213	0.826344	0.423243	0.280161	0.400948	0.219368	0.614708	0.372476	0.108029	1.77742	1.69352	0.953255
gene11807	LOC101102735	0.140512	0.248153	0.117143	0	0	0.0507489	0	0.0573299	0.330015	0.417661	0.077768	0.666874	0
gene11808	VPS13C	4.68359	8.79607	8.606	13.2096	11.5014	14.8448	11.6081	10.1518	12.4641	3.28846	12.7227	13.1818	17.1396
gene11809	RORA	87.5754	96.8918	68.6454	330.834	352.162	473.458	285.14	542.597	289.009	13.7227	566.501	524.757	506.287
gene1181	SEMA6C	1.48957	1.74843	1.93847	1.09299	1.13499	0.813542	0.539569	1.20068	1.02395	1.55687	1.16625	0.672466	0.768687
gene11810	ICE2	8.63562	11.2749	9.91753	23.4741	22.6324	30.5528	17.829	27.6334	25.4313	2.59306	31.6323	31.5165	42.2034
gene11812	ANXA2	1833.95	1990.92	1954.91	1688.63	1603.28	963.986	1402.44	1659.05	1464.87	2166.23	1674.45	1016.14	1533.78
gene11814	FOXB1	0	0	0	0	0.0700106	0	0	0.0768059	0	0	0	0	0
gene11816	BNIP2	12.1949	20.304	20.7134	29.3378	27.9752	27.7849	27.7128	25.1104	28.2132	6.87418	29.8676	26.3692	41.1031
gene11818	GTF2A2	86.2179	77.9424	86.9312	167.267	185.058	199.487	195.903	141.309	161.052	72.8604	158.433	203.018	205.026
gene11819	GCNT3	0.466051	0.46298	0.25498	1.14485	0.617482	0.410289	0.99243	0.392188	0	0.541133	0.580367	0.829458	0.882419
gene1182	TNFAIP8L2	2.07076	2.68796	4.19506	3.07467	2.81868	1.21159	1.41106	2.23049	2.50956	4.09318	2.95689	2.18178	3.40546
gene11820	FAM81A	3.53456	4.10449	4.37163	3.12943	2.74431	3.50447	4.16226	5.26276	2.16975	0.431761	7.13893	3.98466	6.49587
gene11821	MYO1E	28.1753	42.6953	28.6229	61.9086	43.3689	62.1606	49.6779	78.4728	57.9796	8.44607	78.3649	61.3089	100.426
gene11822	CCNB2	9.34608	11.627	8.58809	10.7863	8.6129	9.4552	9.38288	7.33157	7.71307	6.54222	6.04433	4.99932	5.25148
gene11823	RNF111	9.28319	18.949	14.2425	17.9357	17.1905	18.5956	18.9162	19.6441	16.8341	6.10691	16.4184	20.3345	29.1581
gene11824	SLTM	66.9694	73.6433	49.4035	128.611	116.444	144.114	114.661	144.657	114.294	18.8976	122.791	95.4166	156.951
gene11825	FAM63B	7.95493	11.1073	10.9869	17.9859	18.1287	19.1641	19.686	17.8543	19.0918	2.73271	20.9364	20.5385	24.7493
gene11826	ADAM10	18.2808	30.6691	30.4731	50.3463	43.1231	52.0417	46.5141	49.1167	44.4159	9.54345	44.1784	45.4524	55.2678
gene11827	LIPC	3.05976	7.52299	1.93707	10.996	15.0849	12.2873	8.3032	14.6999	16.5465	5.52798	18.0988	15.3294	18.4835
gene11829	AQP9	39.3536	48.8453	51.1013	80.9401	63.8904	64.5982	92.2166	35.7852	14.6835	1.12217	29.2861	36.6379	30.6293
gene1183	LYSMD1	4.57181	5.4234	4.74338	6.39918	5.0168	5.47074	4.05985	6.14943	3.61067	5.04	6.58995	3.11162	5.79801
gene11830	ALDH1A2	1.16139	1.58423	1.99427	2.64949	2.88168	3.41828	1.81721	1.78226	1.36792	0.34779	2.1586	2.04848	1.62539
gene11832	POLR2M	10.9184	12.2298	14.5888	12.1277	9.24241	9.28417	8.89573	9.42769	6.53913	7.39038	10.4635	5.40721	10.4435
gene11833	MYZAP	34.7501	49.3598	49.9626	80.1292	43.8271	75.3602	47.7124	95.6769	42.9	8.06568	107.902	61.7915	120.267
gene11834	CGNL1	28.3563	39.8358	38.2737	33.8634	38.5557	34.8488	20.9203	26.7997	33.4031	10.9538	36.4584	24.3703	51.6425
gene11835	TCF12	55.4245	96.0484	63.9796	198.181	235.24	272.657	229.851	201.487	179.195	9.26315	201.767	285.272	206.161
gene11836	ZNF280D	8.57297	11.6425	9.59755	21.5508	24.9286	26.4237	33.3456	16.1648	22.1717	2.52707	23.6246	28.6547	29.9352
gene11837	MNS1	11.5172	10.7144	5.03902	13.0447	16.2387	18.2461	22.5664	10.3429	16.1452	0.759761	14.5794	15.4563	19.5644
gene11838	LOC101120923	0	0	0	0	0	0	0	0	0	0	0	0	0
gene1184	LOC101112865	34.0302	32.5852	26.0654	31.477	26.657	24.8887	22.359	25.9467	26.6751	70.0162	32.7248	21.097	32.5231
gene11840	TEX9	26.292	31.0746	20.9076	69.0225	70.4534	84.8787	76.9959	38.9484	66.5644	14.7952	65.1464	70.4541	86.9439
gene11842	RFX7	6.75827	11.2315	7.88799	16.5514	17.357	22.5	18.8446	19.5436	18.3198	1.79065	19.4419	23.0146	21.3026
gene11844	NEDD4	7.99646	11.0515	10.9242	13.8087	16.0256	15.7752	15.1752	19.3152	23.9181	8.97157	21.7009	17.3651	32.361
gene11845	PRTG	0.07352	0.155809	0.140973	0.178371	0.284364	0.308018	0.393935	0.203977	0.234836	0.0400643	0.203452	0.293099	0.35353
gene11846	PYGO1	7.68069	11.3235	11.6094	16.1391	16.8162	18.6222	14.2757	13.0801	11.5138	3.32527	17.5213	22.8859	12.8464
gene11847	DYX1C1	19.3679	17.8574	15.6259	34.7037	38.9994	37.5527	36.5407	59.1258	42.7237	14.0992	47.2271	53.1859	51.5631
gene11849	C7H15orf65	2.14381	3.14381	3.25537	5.79563	4.01497	4.97751	3.4113	4.49839	3.88419	1.2517	4.06804	8.61203	6.2957
gene1185	TMOD4	2.19034	4.43021	1.22148	6.98013	3.2364	6.63869	2.97371	5.25333	3.00318	4.02513	8.2565	2.82361	6.1914
gene11850	CCPG1	64.297	69.0795	88.0742	95.1646	113.199	113.337	128.324	113.639	130.977	19.5972	119.392	143.59	155.885
gene11851	PIGB	14.2029	26.1167	13.5441	46.2014	43.1133	63.4905	54.692	37.343	53.1116	2.41746	46.6376	47.5618	49.6772
gene11852	LOC105610830	7.16284	7.85028	9.98783	11.811	11.8462	12.8091	12.266	8.03036	9.82585	9.79761	10.6301	9.20571	12.5734
gene11853	RAB27A	17.5344	11.9148	18.2326	24.9127	25.5934	34.614	33.9521	23.4322	13.9286	3.27531	38.466	41.8258	34.3732
gene11854	RSL24D1	80.6019	105.633	87.9544	128.484	119.906	152.299	151.149	93.7741	89.1425	59.9351	94.0784	98.8538	122.338
gene11855	LOC101105256	0.559105	1.54283	1.39835	1.4243	1.03968	0.50483	1.0583	0.969502	0.853544	0	0.618885	0.398028	1.5459
gene11857	UNC13C	0.732236	1.13458	0.449203	2.35305	3.68409	2.64212	3.73558	3.44134	2.75488	1.30385	2.19072	4.2686	2.91981
gene11859	WDR72	0.251859	0.650518	0.377948	0.476618	1.30668	0.654941	0.484063	0.832356	0.727582	0.168442	0.585455	0.645477	1.30798
gene1186	VPS72	46.5368	54.0183	43.918	51.3892	37.6042	42.6543	34.9102	48.1297	37.005	46.3578	47.9234	28.2204	47.6324
gene11864	ONECUT1	0.00716306	0.0284634	0	0.0938449	0.03996	0.162986	0.0688356	0.061374	0.0201883	0.053229	0.0237868	0.0815904	0.103333
gene11865	FAM214A	20.0695	37.4579	32.5638	50.1785	49.789	55.2977	54.4021	46.4741	47.361	6.7369	44.4273	65.7048	58.7209
gene11866	ARPP19	3.70131	7.44844	6.39883	11.3242	11.4326	11.595	12.5257	11.1593	9.18724	3.80239	12.8734	11.5384	13.2643
gene11867	MYO5A	7.60524	13.9929	14.2625	16.0524	12.1788	16.1174	12.3769	16.9177	15.3222	6.7193	13.6438	16.0266	20.5605
gene11868	MYO5C	3.45171	6.48619	4.43749	9.06312	6.02509	11.0032	6.94406	6.22293	8.08264	1.36639	5.73116	5.19934	10.7127
gene11869	GNB5	1.66018	2.56117	2.10053	2.87162	2.30993	2.20091	1.97932	2.78516	2.87623	1.62556	4.11858	2.36377	4.12777
gene11870	BCL2L10	0.434989	0.576163	0.380777	0.443248	1.79572	0.0942631	0	0.425948	0.919476	0.22627	0.288899	0.061934	0.502008
gene11873	MAPK6	44.8696	72.8877	74.0176	86.7602	75.3392	88.4721	80.6582	80.5642	104.479	21.0195	90.3918	80.9873	115.459
gene11874	LEO1	17.5469	28.5372	25.1024	31.8881	22.8301	32.1282	25.856	31.4349	26.2919	36.1672	27.4288	14.6263	31.4008
gene11875	LOC105607297	1.58336	1.86421	1.64003	4.81932	2.78373	5.75329	3.78649	2.77985	4.37238	3.42285	5.68286	4.71375	6.09103
gene11876	TMOD3	32.812	65.893	69.7826	68.8538	67.6446	82.5906	65.8846	74.7605	79.5235	22.4004	71.4518	78.4133	80.7161
gene11877	TMOD2	1.20214	3.07412	4.3535	1.9219	2.51969	2.19095	1.2991	5.12025	7.02097	1.67819	6.9687	3.37374	10.4452
gene11878	LYSMD2	2.01533	5.08695	2.71043	3.32117	3.47889	3.46084	1.95994	6.23681	6.43015	1.80842	7.38692	2.92357	8.7767
gene11879	SCG3	0.358084	0.553349	0.783641	1.08596	0.865634	0.775976	0.782072	0.949653	2.3128	0.643061	0.54501	0.977198	3.83121
gene1188	PIP5K1A	18.1909	41.0584	32.0733	49.9914	27.9444	44.1483	29.1546	47.3357	34.0694	7.33039	46.2774	29.6616	61.4563
gene11880	DMXL2	0.74336	2.80365	1.78041	4.38344	3.42297	6.43668	4.14414	3.80919	5.26432	0.280879	2.9183	3.65955	4.51664
gene11882	GLDN	2.80029	10.1334	6.88925	14.174	7.8211	15.1112	7.99472	12.4783	7.96968	0.979251	4.40644	3.67436	7.9473
gene11885	CYP19	0.205843	0.218119	0.154448	0.239715	0.0918658	0.13382	0.0719313	0.302347	0.232058	0.12237	0.273423	0.175848	0.118779
gene11888	TNFAIP8L3	46.5912	51.8612	47.0451	76.2897	46.0098	80.395	61.206	81.1858	61.5372	103.866	68.3739	47.8778	82.1153
gene11889	AP4E1	6.2818	9.31255	9.58825	15.1679	10.8108	16.7269	14.6399	10.2444	13.8127	9.8161	12.7152	13.4628	14.3831
gene1189	PSMD4	297.085	234.947	247.923	138.151	170.655	93.6772	163.704	153.897	155.269	487.107	137.299	97.3601	100.429
gene11890	SPPL2A	16.0848	32.5834	36.7063	41.74	37.4689	40.5924	36.2801	33.9178	34.8338	11.8708	39.2909	44.4967	52.4431
gene11891	TRPM7	6.5371	16.4633	16.7528	24.4212	19.8962	27.4768	26.2916	17.4863	19.5051	1.1153	18.1824	25.7224	27.9061
gene11892	USP50	2.7522	5.95227	2.0704	17.5904	14.7058	21.7595	12.1721	12.238	8.69605	2.28484	12.1383	10.5312	17.8042
gene11894	USP8	56.9927	59.7477	68.0304	83.4061	73.279	85.8992	73.2406	84.6353	69.5599	18.0349	84.3032	48.9322	92.9935
gene11896	GABPB1	13.5528	23.9483	16.3107	34.7217	30.2591	36.2404	35.533	27.9662	28.1619	8.55602	31.4144	24.5049	31.5543
gene11897	HDC	0.52774	0.733967	0.395973	1.07552	0.942101	1.37235	0.5302	1.90559	1.30145	1.66671	2.4535	1.20224	4.03495
gene11898	SLC27A2	0.279134	0.268892	0.539465	0.369394	0.56625	0.49491	0.55422	0.062121	0.107278	0.113141	0.294935	0.180651	0.219641
gene11899	ATP8B4	2.3805	6.47661	3.52667	9.33441	14.4165	11.5604	8.2624	18.2571	24.963	2.00801	19.7271	13.0231	24.0386
gene119	LOC106990791	0	0	0	0	0	0	0	0	0	0	0	0	0
gene11902	DTWD1	18.2006	25.2835	18.6277	26.9253	37.642	41.4184	47.1409	29.8245	44.0675	26.3901	35.2156	40.0299	43.4041
gene11903	FAM227B	3.01481	5.87243	3.95492	10.7134	11.74	11.401	8.85678	7.34419	15.5777	1.18605	12.0727	14.6871	16.7996
gene11904	FGF7	0	0	0	0	0	0	0	0	0	0	0	0	0
gene11905	GALK2	8.30684	12.2972	10.5916	23.5916	23.9881	28.737	18.2848	29.9383	29.3414	9.21893	30.8303	27.7517	37.7906
gene11906	COPS2	11.8369	18.4603	17.1588	26.9395	27.7029	31.7028	37.7647	18.0611	22.8912	6.78751	22.8347	30.0569	25.0556
gene11908	SECISBP2L	38.4776	39.8793	59.1421	59.9495	61.177	68.1757	64.1547	58.2205	47.8933	5.98531	103.586	83.4296	98.8521
gene11909	SHC4	1.48992	2.89242	2.1192	3.87417	3.56579	4.2392	2.77216	2.77034	3.18945	0.794457	4.47558	3.5302	4.01976
gene11910	EID1	0	0	0	0	0	0	0	0	0	0	0	0	0
gene11911	CEP152	1.954	3.45089	2.65788	4.1319	4.42911	5.03666	4.4563	4.59884	4.8598	0.682708	4.84951	3.81687	5.64752
gene11912	FBN1	19.646	50.1285	38.4646	36.7343	37.1527	29.4244	23.3318	55.541	76.5651	40.0214	77.8614	34.1489	95.4723
gene11913	DUT	104.254	77.0114	71.514	111.737	115.041	114.719	114.599	66.8428	82.7402	201.767	66.5776	52.7416	63.078
gene11914	SLC12A1	0.0188627	0.0249845	0.0235884	0.082375	0.168365	0.163504	0.329576	0.507943	0.398718	0	0.187916	0.134284	0.789122
gene11915	CTXN2	0	0	0	0	0	0	0.0259881	0	0.0209601	0	0	0	0
gene11916	MYEF2	6.55529	10.9283	11.625	9.91267	12.0112	12.0318	11.2315	8.85384	11.9851	0.503924	10.6966	14.0002	12.106
gene11917	SLC24A5	27.0729	45.8232	44.8132	58.6033	55.0624	63.4594	59.3631	40.8783	44.8492	21.9916	51.7455	50.493	79.2428
gene11918	SEMA6D	2.31169	5.09885	4.54097	5.01156	7.11774	5.92323	3.24166	11.1118	7.99724	1.26072	15.139	12.205	16.1445
gene1192	ZNF687	6.48123	9.80738	7.88623	4.71026	3.0573	3.07431	2.4533	3.53245	3.25896	2.31785	4.11414	1.96458	4.07912
gene11922	LOC101113241	0.144985	0.0640132	0.423052	0	0.107842	0.0523643	0.126662	0.354929	0.136208	0.0718261	0	0.13762	0.488025
gene11923	SQRDL	25.9475	46.0191	24.2409	27.43	35.8953	26.1717	21.3974	51.512	48.1496	51.8369	57.968	37.7149	57.4894
gene11925	BLOC1S6	26.2616	36.8059	36.835	58.9963	46.7425	66.1571	63.6966	49.368	43.3589	19.937	50.8519	59.3208	70.3168
gene11927	SLC30A4	2.99492	7.74957	6.79464	10.0535	6.61912	9.96562	6.22651	6.67063	7.65673	2.65727	7.7444	5.00984	8.64087
gene11929	C7H15orf48	4.13221	3.72651	5.71718	5.24733	3.92376	4.66782	7.604	23.0296	12.8851	17.7053	33.7213	34.8001	9.89285
gene1193	PI4KB	36.6738	50.3325	37.2152	37.4748	23.6292	27.5241	19.9581	39.626	25.0928	33.6996	46.8017	24.5978	39.0503
gene11930	SPATA5L1	6.02324	9.21789	7.32867	12.3818	9.71717	11.2445	10.4885	10.6105	8.77467	8.2411	8.04125	6.48989	10.0687
gene11931	GATM	81.4457	140.829	156.596	148.2	95.0947	103.863	99.0275	104.093	56.2432	19.27	84.407	75.037	92.5662
gene11933	SLC28A2	0	0.0215891	0	0	0.0181855	0.0706418	0.0427181	0.119704	0.137813	0.0726724	0.135315	0.046414	0.164592
gene11936	SHF	77.6483	68.6366	57.9399	78.1883	60.0711	57.2589	44.2609	64.4878	42.7286	40.1044	62.9712	49.6588	55.2203
gene11937	DUOX1	5.90607	7.79656	6.85195	10.0713	4.42995	7.15214	3.16516	13.5835	3.45501	0.287671	19.7115	8.81894	8.7348
gene11938	DUOXA1	14.614	15.1453	16.8988	13.7076	6.99281	10.4017	6.0363	17.1767	8.91829	1.02236	19.4423	10.9261	14.1575
gene11939	DUOXA2	0.85661	0.702383	0.255051	0.950065	0.546138	1.59111	0.605807	1.04851	0.344894	1.84903	0.948199	1.16157	2.94222
gene11940	DUOX2	0.798607	1.35162	0.762881	1.95369	0.519765	1.44216	0.416669	1.9686	0.531435	0.173089	1.43649	1.21602	1.52008
gene11942	SORD	9.61639	13.3595	10.0471	10.9037	14.177	9.18734	7.4724	13.2231	14.5616	9.14833	11.0414	11.932	14.7997
gene11944	LOC101115542	0	0	0.204488	0.158691	0	0.118118	0	0	0	0	0.0905024	0.0776073	0
gene11945	FERMT2	23.782	48.5557	45.0003	51.881	60.4348	52.3724	44.4224	56.1485	74.9422	25.9595	57.5127	55.8424	104.439
gene11946	DDHD1	20.305	20.0522	25.2906	50.7018	36.8705	58.8357	49.3003	52.9399	24.0923	3.30523	63.5431	77.611	70.8648
gene11949	BMP4	103.021	137.394	115.021	143.166	106.572	128.141	80.8074	98.7196	102.149	36.4016	86.4285	54.6279	80.5378
gene1195	RFX5	2.35307	4.95613	5.6118	4.36123	3.15619	2.68889	2.74091	3.39958	2.68173	0.773959	3.0103	2.06877	2.55979
gene11951	CDKN3	12.9192	16.8157	12.7288	25.8893	26.0829	30.6018	27.2633	15.3341	14.5015	6.56644	14.0219	17.0407	23.5585
gene11952	CNIH1	108.905	158.812	178.051	235.131	222.388	246.845	244.519	169.924	202.954	75.4404	195.9	253.032	240.273
gene11953	GMFB	18.4692	30.9257	38.5982	50.4452	51.7055	48.9988	54.0453	38.7001	41.5845	17.7444	39.7458	59.7077	54.9029
gene11954	CGRRF1	6.09079	6.89459	6.88744	13.9912	15.5673	15.3519	16.548	10.5219	12.0224	4.33349	14.273	19.7736	19.4736
gene11956	SAMD4A	7.38045	13.2955	11.7331	16.9965	17.5657	15.9936	12.3707	22.345	29.9703	4.86229	27.0321	18.3993	59.3393
gene11957	GCH1	10.574	13.4772	12.7241	30.1073	20.5532	25.0037	20.6249	44.6892	22.6792	6.47386	35.9971	30.016	66.58
gene11958	WDHD1	7.07318	12.8497	9.08935	19.762	13.9404	17.8498	17.0159	14.2457	13.8825	5.35655	13.1654	10.862	15.403
gene11959	SOCS4	10.878	18.4612	20.5679	26.5416	22.9276	27.5679	30.8623	18.1352	18.8929	8.31303	17.036	25.1082	23.1558
gene1196	SELENBP1	206.144	215.573	219.189	94.4482	70.6341	44.8275	59.1933	93.2811	65.5353	178.565	56.5349	29.1852	55.3886
gene11960	MAPK1IP1L	33.9918	52.9051	40.265	75.7611	43.226	71.7177	46.4529	52.3643	39.9677	16.6013	65.5303	44.2039	76.5524
gene11962	LGALS3	1238	1035.13	1287.13	685.09	875.946	541.476	613.505	891.112	847.14	550.546	1029.8	957.126	897.615
gene11963	DLGAP5	11.9813	17.6194	13.2441	31.5423	30.8985	34.727	38.1025	17.0764	18.5495	11.0388	16.4304	18.4778	21.3626
gene11964	FBXO34	7.87701	14.1748	13.7972	17.8754	13.0201	15.2736	13.3459	14.6572	11.3432	4.36545	13.8935	9.76149	15.591
gene11966	ATG14	9.99945	12.6526	12.896	21.9318	16.5438	22.0565	17.6276	21.2687	15.7082	4.00878	24.5208	16.4652	23.3037
gene11967	TBPL2	0.132066	0.058309	0	0.192247	0.0982327	0.286189	0.192292	0.269418	0.186106	0.327129	0	0.0626786	0.190516
gene11970	KTN1	149.364	185.847	149.12	269.963	296.917	348.6	342.582	246.774	278.026	39.0548	259.347	212.988	309.39
gene11971	LOC105615734	0.0353007	0.109101	0.0294297	0.411096	0.210058	0.229492	0.143917	0.115223	0.0497456	0	0.312601	0.083769	0.135798
gene11974	PELI2	3.4937	6.4786	3.59364	11.3248	13.4234	15.2645	11.25	10.1307	12.2875	0.830049	18.571	14.881	27.4856
gene11975	TMEM260	24.6082	33.8121	32.9237	53.9273	44.5416	57.1494	44.9261	51.0423	33.4661	8.40518	51.1477	48.5035	65.2464
gene11976	OTX2	0	0	0	0.110503	0	0.0205626	0.0165793	0	0.133716	0	0.0315103	0.189144	0
gene11978	EXOC5	13.6957	20.7014	23.9236	34.3315	26.7944	34.6922	36.8147	24.8379	25.3901	8.33133	25.2545	27.1278	34.5318
gene11979	AP5M1	8.63752	14.1217	16.0301	26.84	23.5133	29.5001	28.7721	17.3528	16.4002	5.39609	21.6524	19.4141	25.2793
gene11980	LOC106991261	0.476988	0.126359	0.238595	0.624913	0.585407	0.72355	1.08343	0.40869	0.537735	0.177226	0.871181	1.35828	1.16976
gene11981	NAA30	15.2328	18.7572	23.2558	23.8724	20.0527	23.3097	24.3519	20.8202	17.1269	10.493	20.8554	22.0555	25.4773
gene11982	C7H14orf105	0.0346298	0.0917373	0	0.302462	0.347736	0.525304	0.57481	0.91133	0.61	0.141534	1.17872	0.665631	1.19895
gene11983	SLC35F4	0.0388315	0.0771512	0.04856	0.0565268	0.0866507	0.336595	0.220506	0.142592	0.300966	0	0.548039	0.0829328	0.25208
gene11985	C7H14orf37	25.7298	34.1812	36.2752	41.1446	37.277	44.2751	42.858	27.9244	26.9117	24.6718	27.6897	35.5759	30.4638
gene11988	ACTR10	50.7638	66.4347	55.0635	100.565	86.8573	105.315	99.5123	90.6025	80.9104	33.3875	104.581	92.2734	120.186
gene1199	PSMB4	382.109	309.227	321.989	456.926	386.198	427.968	512.611	490.452	411.19	840.597	448.013	410.068	365.696
gene11990	PSMA3	209.511	195.222	158.624	314.532	361.336	407.219	478.772	341.801	387.93	252.661	340.266	572.996	427.471
gene11991	ARID4A	37.3419	34.0583	28.7034	59.7208	61.3474	72.0053	66.7213	63.3066	51.4535	3.49396	67.369	57.4264	92.2493
gene11992	TIMM9	25.7143	36.2199	27.4655	45.7415	36.0293	45.5918	34.9077	34.0033	33.555	33.2882	36.738	29.1813	44.0748
gene11993	KIAA0586	4.66035	10.8476	6.40728	17.6544	15.6294	20.2277	18.4283	19.1479	20.4509	3.6859	22.965	20.0421	23.1961
gene11994	DACT1	5.95982	10.5479	9.10913	6.05566	8.24085	4.93053	4.43526	5.2166	5.95793	1.4384	7.80932	3.19117	5.2908
gene11996	LOC105612775	0	0	0.107963	0	0.963253	0	0.377116	0.105675	0	0	0	0.491692	0.622723
gene11997	LOC105612774	0	0	0	0.20047	0.102434	0	0	0	0.0646888	0	0.0762196	0.0653596	0.39733
gene11998	DAAM1	39.6797	48.3591	41.9958	76.9999	64.9153	90.2655	74.0677	86.5161	69.747	8.44362	91.9011	79.2565	107.388
gene11999	GPR135	0.242726	0.739452	0.166944	0.830334	0.582252	1.02568	0.583136	0.861591	0.615685	0.595223	0.846336	0.311035	0.787843
gene12	FARP2	42.5919	60.9225	39.9956	61.3435	32.3521	49.3093	28.6538	59.1891	28.5542	34.063	57.2265	33.4238	60.5157
gene120	EFHD1	238.48	239.469	279.016	148.56	146.636	124.77	138.755	239.248	184.64	103.683	124.255	127.539	141.748
gene1200	POGZ	11.345	24.2942	14.4507	24.6627	20.7327	24.4055	15.9184	19.1538	20.5036	8.27398	25.1577	18.3596	34.7292
gene12000	L3HYPDH	6.56173	8.73082	10.3689	10.3768	9.51742	10.0829	8.49445	9.01738	8.06989	5.38582	8.66646	4.84118	9.55192
gene12001	JKAMP	19.9666	31.2591	20.9079	60.7047	57.2177	74.5869	59.7451	52.539	60.8952	12.2569	65.6104	63.1288	95.7336
gene12002	CCDC175	0.505525	1.41358	0.126435	2.0932	1.89262	2.61699	1.70766	0.426265	1.26646	0.225395	0.988585	0.991682	1.9285
gene12003	RTN1	6.80433	13.9683	7.27265	11.316	9.55999	13.9049	9.8565	8.42353	8.57784	1.52698	6.43748	5.85146	7.15912
gene12006	LOC101117591	0.409576	1.0511	0.38414	1.25454	1.409	1.75663	1.67725	0.69977	1.29864	0.285335	0.665884	1.385	1.56329
gene12007	PCNXL4	4.63423	11.2122	5.61333	18.1003	18.1394	21.1357	17.9431	15.474	15.8627	2.41421	16.8499	14.2222	21.7546
gene12008	DHRS7	68.0497	74.2549	74.6032	65.9	87.91	60.4305	56.7681	105.189	98.9362	54.0247	93.0024	47.4547	95.3311
gene12010	LOC101103401	0.341391	0	0	0.331307	0.126966	0.1233	0.19883	0.975027	0.160362	0.930194	0.566839	0.648099	0.328324
gene12011	PPM1A	38.622	55.3449	55.811	71.5102	71.7941	80.5378	79.3207	50.8404	51.7842	14.0816	53.8894	52.9643	67.1846
gene12012	C7H14orf39	0	0	0	0.0214113	0.0492324	0.0637479	0.154197	0.0180036	0.124364	0.0983705	0.146532	0.209422	0.0848739
gene12013	SIX6	0	0	0	0	0	0	0.0731899	0	0	0.0622557	0	0	0
gene12014	SIX1	0.364017	0.0964315	0.455214	0	0.243686	0.0788833	0.127205	0.445564	0.820753	0.541006	0.120882	0	1.2603
gene12017	LOC101118363	0	0	0	0	0	0	0	0	0	0	0	0	0
gene12018	SIX4	0.0516916	0.109548	0.245639	0.331087	0.242229	0.26884	0.162571	0.607405	0.33508	0.0230473	0.102993	0.220796	0.26845
gene12019	MNAT1	39.9908	49.7136	27.2281	117.898	123.326	158.672	141.933	130.514	136.155	27.9885	135.132	160.067	174.021
gene1202	CGN	10.7364	12.4234	12.5844	9.44999	6.20137	6.8692	6.11705	13.8989	5.67551	1.57306	15.1588	5.50251	7.50132
gene12021	TRMT5	6.14279	8.13641	9.81556	10.2833	7.53904	10.0576	7.99006	8.10369	6.9732	3.88003	7.87619	5.6364	9.89535
gene12022	SLC38A6	5.39583	9.15797	6.82461	13.6486	12.8417	15.8499	11.3456	18.6084	16.4797	3.5218	20.405	19.4256	25.0093
gene12023	TMEM30B	12.9188	16.7933	19.6222	10.6271	9.50614	8.29048	9.89756	8.34758	6.32882	1.66181	8.16273	9.07854	7.8652
gene12024	PRKCH	45.2658	80.2181	52.5241	139.318	109.377	173.834	125.734	168.769	152.167	19.7798	128.522	137.799	167.771
gene12026	HIF1A	33.4928	62.8322	71.8734	74.4431	61.6432	59.4585	72.8382	71.8465	79.4847	17.8714	68.8085	81.1311	111.137
gene12027	SNAPC1	8.00355	10.943	8.68494	16.9875	18.5797	24.0296	17.6831	23.164	20.1559	6.69571	23.7915	24.7025	44.321
gene12028	LOC101118878	9.99631	13.6467	12.6157	6.38304	5.71342	4.05336	4.98261	7.84434	3.71613	2.87106	7.22967	2.79417	4.68889
gene12029	SYT16	0	0.0771633	0.0364257	0.0706695	0.010833	0.0210405	0.101788	0.10696	0.150507	0.0216453	0.12897	0.207364	0.224106
gene1203	TUFT1	72.166	103.701	92.8973	117.433	71.2906	103.593	69.9614	129.514	61.8542	21.7974	123.852	53.1363	98.6675
gene12031	KCNH5	3.17017	5.02507	5.54851	5.77794	5.02288	5.90551	5.51065	5.37522	5.08988	0.588941	5.43626	4.44895	4.81689
gene12033	RHOJ	8.40223	18.2783	16.074	20.8171	21.2532	21.1821	16.9816	33.5778	51.831	7.37395	44.9632	30.0531	65.7956
gene12034	GPHB5	0.0625807	0.0552607	0	0.0303661	0	0.0452046	0.0182239	0	0.0587922	0.139512	0	0.0297009	0.120371
gene12036	PPP2R5E	26.4461	32.142	26.8246	48.983	52.3853	61.5461	64.0237	58.6378	52.1114	11.0044	55.5445	61.8688	59.8509
gene12038	WDR89	14.9273	17.1521	10.8269	30.5301	29.4374	40.2326	37.6879	40.3339	31.0274	20.2994	26.4581	32.5712	40.5915
gene12039	SGPP1	9.78103	13.884	17.0322	16.101	16.7108	16.1078	18.8007	12.6395	10.5061	4.72979	16.7945	17.9346	14.3187
gene12040	SYNE2	186.085	321.187	229.423	368.479	342.494	480.092	316.554	432.78	302.448	32.9399	574.165	405.772	491.781
gene12043	ESR2	1.33611	1.92589	2.01484	4.11875	3.15684	4.89659	1.40757	2.21263	5.26087	0	4.11066	1.7345	0.963726
gene12044	LOC105607025	0.114635	0.182208	0	0.100124	0.0255803	0.173892	0.240354	0.364821	0.161543	0.357781	0.114203	0.130575	0.46304
gene12045	MTHFD1	2.91083	8.1771	4.6601	4.77275	3.6938	5.40671	3.70265	3.62164	3.87654	0.154504	4.80653	3.16527	4.799
gene12046	ZBTB25	4.49272	9.38331	3.8758	14.0089	12.5243	18.5968	11.9682	14.3457	12.1117	2.02249	14.5084	12.1631	16.7195
gene12048	AKAP5	0	0	0	0	0	0	0	0	0	0	0	0	0
gene12049	ZBTB1	12.8982	27.7323	29.1558	41.4018	38.1323	42.6021	43.9429	28.8651	27.0337	5.37758	29.4098	29.9375	38.4138
gene12050	HSPA2	84.661	74.3695	101.226	31.6258	42.2991	17.9195	31.6098	42.0542	28.1564	24.4605	30.1714	24.3452	15.6821
gene12051	PPP1R36	13.3488	22.0073	8.22813	37.3475	40.35	54.7768	23.9438	36.3285	47.0942	5.59293	48.5723	37.136	62.2772
gene12052	PLEKHG3	18.7098	39.8306	27.7241	49.72	23.9196	41.3368	22.796	34.6682	30.8395	5.34131	39.6239	22.9822	45.8246
gene12053	SPTB	4.57532	5.52403	7.13431	3.59051	2.58391	1.89728	1.87518	2.48901	1.96344	1.658	3.79839	1.70231	3.53102
gene12054	CHURC1	52.422	55.6986	69.6233	103.421	97.9031	123.795	134.873	83.2199	71.1036	27.1922	101.577	112.44	105.702
gene12055	GPX2	324.821	148.17	239.588	153.954	194.662	69.1962	125.597	161.247	183.617	82.3268	181.068	279.177	78.7447
gene12056	LOC105615749	41.9028	23.0321	30.3013	18.1814	18.8363	11.0544	12.6975	15.6843	13.2932	7.37088	17.881	12.7393	13.6374
gene12057	LOC101110847	18.6932	17.1804	21.7861	23.0465	11.7761	17.7052	10.4428	17.8999	8.78076	1.55919	20.2696	9.86763	26.7831
gene12058	FNTB	14.562	20.937	13.87	24.4104	19.0252	22.1956	15.7867	25.8589	17.0651	11.0314	21.2345	16.5438	19.8369
gene1206	LOC105613572	0.267614	0.42536	0.37928	1.92185	1.03509	1.27583	0.81048	2.35846	0.879946	0.715914	2.45869	1.49872	2.83108
gene12060	MAX	45.5929	56.5316	51.1553	56.9669	48.467	47.7537	38.3925	51.466	38.9957	6.54078	64.9772	39.4902	76.0942
gene12062	FUT8	14.2485	18.7858	16.9697	32.3388	50.7448	38.4419	35.3547	32.818	33.1873	5.38352	42.9187	45.498	45.4982
gene12068	LOC101111970	0.0564342	0	0	0.0821509	0	0	0	0	0.0795268	0	0	0.160703	0.162823
gene12069	GPHN	34.3494	52.3392	24.7324	109.074	117.171	165.793	123.018	126.6	138.814	9.76798	131.453	156.765	131.607
gene1207	SNX27	111.1	93.5143	90.7301	162.686	234.414	232.27	278.683	330.427	223.422	199.27	184.94	366.276	180.445
gene12071	FAM71D	0.146377	0.436238	0.137287	0.15981	0.449121	0.198252	0.383634	0.671882	1.18608	0	1.57977	1.82361	1.84767
gene12072	MPP5	12.6122	20.1017	18.9675	28.9138	26.9065	30.1373	30.0052	25.3088	19.7994	4.86634	26.0038	24.0624	29.4907
gene12073	ATP6V1D	2.49441	6.15739	2.3395	17.4953	9.23477	13.8207	9.36051	17.1396	7.26989	0.547658	8.0951	6.21523	11.613
gene12074	EIF2S1	14.1015	21.4964	10.6432	45.4277	35.3769	59.3988	44.5027	30.5889	29.1022	5.23945	43.7106	50.7292	51.3983
gene12075	PLEK2	26.1431	26.7714	28.1375	21.4917	18.2708	16.4858	18.6148	21.8197	8.4947	5.55743	22.5334	14.8707	13.4393
gene12077	TMEM229B	121.431	104.726	138.283	63.1216	45.5749	45.3236	42.2367	83.2658	24.4747	16.589	93.4694	80.1722	59.5517
gene12078	PLEKHH1	2.30902	2.34442	2.21341	2.96303	1.62473	2.68491	1.6236	4.01785	2.25616	0.406541	4.83573	2.78357	4.14339
gene12079	PIGH	12.2215	8.64273	11.9159	15.5293	12.5958	18.6849	12.4414	16.4173	8.83018	5.34907	22.2701	17.9172	20.1706
gene12080	ARG2	12.0057	22.7008	18.3317	36.7262	28.6829	39.4962	29.7171	37.2172	23.416	10.57	37.3402	31.7721	46.624
gene12081	VTI1B	126.819	114.918	137.656	97.0917	95.3184	72.9157	97.6752	103.025	94.2711	131.116	105.229	76.6151	104.172
gene12082	RDH11	30.1686	32.1304	34.7984	35.7419	24.6806	27.2688	31.778	30.5267	15.3458	9.83236	31.293	21.8818	29.9103
gene12084	RDH12	134.796	64.4341	105.711	114.037	89.095	112.53	106.025	136.642	42.9814	18.2873	148.798	146.914	100.432
gene12085	ZFYVE26	10.0941	14.39	12.801	19.1021	9.92666	17.5484	9.92635	21.9308	12.2459	5.36608	22.7335	12.3268	22.0011
gene12087	RAD51B	44.5246	49.5201	29.3787	136.795	148.666	179.637	184.931	134.908	111.266	15.8319	169.607	166.313	123.53
gene12088	LOC101116576	0	0	0	0	0	0	0	0	0	0	0	0	0
gene1209	CELF3	0.163656	0.191267	0.204656	0.126123	0.0751861	0.125169	0.0336406	0.435986	0.176359	0.0500761	0.767241	0.191894	0.541613
gene12097	ZFP36L1	74.559	145.861	155.193	100.323	64.4155	67.4984	53.6516	55.2373	51.2207	4.9573	70.5314	40.298	47.8349
gene12098	ACTN1	137.772	183.256	175.431	102.789	82.7798	67.7704	53.053	72.8169	82.3794	31.5109	88.9982	55.5958	83.9527
gene121	ZSCAN20	1.36574	2.45239	2.31535	2.45951	1.85369	1.7544	1.24234	1.00819	1.14087	0.816098	1.53125	0.982301	1.48273
gene1210	RIIAD1	1.29556	1.51649	0.866582	3.39175	2.1178	3.22101	2.72866	3.03635	3.36833	2.28369	3.26837	3.20306	3.23082
gene12100	DCAF5	16.8101	27.3467	22.9514	28.8028	22.9616	26.67	19.1731	25.8784	25.3352	6.93799	28.9544	24.3895	37.83
gene12101	EXD2	1.8911	5.61613	4.18209	4.54946	4.21989	6.14707	4.64326	3.9716	4.17972	0.562113	5.94937	3.48615	5.19769
gene12102	GALNT16	10.5748	20.5724	16.1168	16.3557	15.9548	15.2338	8.29349	23.4237	39.3292	16.7656	31.1258	11.7201	52.0491
gene12104	ERH	28.3434	31.2552	22.6402	49.9454	42.215	57.086	44.5467	48.7193	45.6745	69.6863	45.8224	40.5486	52.8215
gene12105	SLC39A9	11.9809	19.4172	19.958	20.0346	14.7679	15.5923	14.1286	17.4222	13.9142	7.30402	16.3572	12.3032	17.3482
gene12106	PLEKHD1	1.35762	3.50655	1.99485	3.65612	1.89342	3.05232	1.83837	5.15144	1.05223	0.428763	3.55032	1.88466	1.90952
gene12107	CCDC177	0.0679107	0.0359803	0	0	0	0	0.0118656	0	0.0191399	0	0	0	0
gene12108	SUSD6	13.5255	32.1411	18.4973	63.6744	30.3228	59.992	30.4897	69.2696	31.0135	3.46528	66.8471	56.7216	70.5893
gene1211	MRPL9	43.6152	40.271	37.2263	53.8743	48.6626	50.0563	53.4183	47.1661	39.6223	34.2672	36.0683	27.6735	37.8734
gene12110	SRSF5	110.301	202.186	108.939	349.7	190.989	388.954	185.07	339.081	193.233	44.2802	405.04	162.558	451.86
gene12111	SLC10A1	1.78813	3.64936	0.992558	7.3308	5.24212	10.399	5.44359	5.23725	7.04521	0.332192	11.785	4.75417	8.59405
gene12113	SMOC1	6.17906	9.16099	7.68318	8.79038	7.01164	7.26567	7.54512	8.63761	5.09586	0.704406	11.0174	5.04872	8.66059
gene12114	SLC8A3	0.0532253	0.193873	0.216319	0.251809	0.207847	0.216263	0.348739	0.390892	0.618789	0.336192	0.530246	0.322075	0.825407
gene12116	SYNJ2BP	7.2162	13.271	12.9784	16.6421	12.1222	14.6211	11.9405	12.9443	11.5075	5.80137	12.8279	10.7362	15.4061
gene12117	LOC101121607	46.6674	53.483	46.0258	87.1794	109	123.43	113.443	92.3744	113.399	132.342	98.4886	172.676	144.541
gene12118	LOC101122955	0	0	0	0	0	0	0	0	0	0	0.109023	0.093489	0
gene12119	LOC105615764	0	0	0	0	0	0.0427139	0	0	0	0	0	0	0
gene1212	OAZ3	0.0706549	0.748685	0.265068	0.925666	0.157663	0.918664	0.123451	0.432414	0.497832	0	0.469256	0.402395	0.815406
gene12120	LOC101123216	0.0190125	0	0	0	0.0212127	0.103001	0.0332194	0.0465433	0	0	0.220976	0.0541402	0.164563
gene12121	LOC105614185	0	0	0	0.131609	0.201744	0.14694	0	0.110663	0.127405	0	0.750572	0.128726	0
gene12122	LOC101101897	0.0176939	0	0.0553167	0.103027	0.0296122	0.143786	0.0772884	0.0324864	0.0623351	0.0394451	0.190961	0.113367	0.178674
gene12123	LOC105615805	0	0	0	0	0	0	0	0	0	0	0	0	0
gene12125	LOC101102399	0.0776839	0.117595	0.180414	0.43618	0.24764	0.276563	0.232684	0.39393	0.218943	0.131948	0.534366	0.410825	0.560328
gene12126	MED6	45.1855	56.9342	32.4856	107.036	89.9602	122.904	105.491	94.1783	87.0976	42.0026	106.004	97.8743	126.398
gene12128	TTC9	36.0807	45.8879	35.469	56.0895	30.8285	65.6752	44.1438	42.681	37.8259	10.7373	54.3425	29.997	42.176
gene12129	MAP3K9	3.36656	7.70842	4.51891	11.0893	4.53175	10.2397	6.30377	7.41873	5.6023	2.5444	6.68675	5.11234	7.79867
gene1213	TDRKH	0.725771	1.89059	1.78494	0.6339	0.350896	0.471828	0.803126	1.86555	1.05684	0.952805	0.923877	0.654459	0.767791
gene12130	PCNX	9.89972	18.7897	15.537	23.3588	20.0496	24.6924	19.3109	23.256	21.4784	4.54831	23.2674	22.5569	28.8112
gene12131	SIPA1L1	19.2897	36.1158	21.9773	55.8381	60.2687	80.7975	50.4085	52.7221	51.7262	7.26489	49.0472	48.2619	67.4955
gene12133	RGS6	7.67913	16.9679	4.20407	40.0261	37.6273	34.9688	22.3209	80.0032	152.896	6.36382	105.528	53.106	133.904
gene12137	DPF3	3.86979	4.35477	1.84916	8.28954	7.23114	9.3745	5.55207	12.7082	13.3894	0.946863	17.3693	7.59281	8.91839
gene12139	DCAF4	14.8552	28.024	11.5402	25.8477	19.2252	25.065	21.7608	28.1624	21.533	8.88324	30.5203	20.5456	38.242
gene1214	LINGO4	0.178145	0.157308	0.185647	0.172883	0.132508	0.160852	0.0907848	0.32708	0.0209201	0.0992855	0.246491	0.105685	0.0428317
gene12140	ZFYVE1	18.4748	28.6081	21.6127	35.9279	21.7592	31.2176	18.8149	33.7315	20.5033	19.7607	31.0505	21.7107	39.1915
gene12141	RBM25	60.1054	69.4884	44.2844	123.44	105.555	143.031	102.217	127.806	111.711	17.2152	127.085	73.685	144.006
gene12142	LOC105606498	0	0	0	0	0	0	0	0	0	0	0	0	0
gene12143	PSEN1	54.9261	81.7748	77.3031	122.811	99.1089	118.984	106.503	122.769	96.6002	40.5831	126.04	98.0477	137.349
gene12145	PAPLN	31.5695	48.2768	35.2954	37.2108	18.008	21.4598	14.6726	29.0879	10.2135	7.39516	28.8816	12.4229	22.3386
gene12146	NUMB	48.8763	77.134	51.2664	107.883	79.2773	116.275	77.0205	112.399	69.366	13.9618	108.741	88.1944	123.086
gene12148	HEATR4	3.47077	4.44695	3.64528	6.17512	5.72005	6.58722	5.48954	5.67826	4.15574	2.90786	4.85883	3.32676	4.99052
gene12149	C7H14orf169	0	0	0	0	0	0	0	0	0	0	0	0	0
gene1215	RORC	39.4384	38.0116	28.7643	51.5778	31.7226	44.9025	36.9844	63.222	21.4958	2.49305	112.05	39.3824	47.353
gene12150	LOC101104407	1.16251	1.21317	1.62996	1.64097	0.786084	0.992403	0.892486	1.89724	0.595708	0.157066	1.2868	1.60503	3.09994
gene12151	LOC101103726	3.84828	3.36312	3.67131	7.21897	4.64774	4.0407	4.36704	6.40999	3.85758	1.68043	6.192	5.59218	7.72629
gene12152	LOC101104669	0.190455	0.378399	0.635118	2.03312	1.16872	0.894225	0.915116	1.55413	1.4314	0.259468	1.37032	1.22027	2.19798
gene12153	LOC106990150	1.29597	1.39471	1.08887	1.45911	0.960197	0.80083	0.760684	1.4004	1.07008	0.285902	1.83239	1.51365	1.38755
gene12154	LOC101103981	5.15343	3.3861	4.31326	6.49763	3.30501	5.75966	4.57303	5.96022	4.9177	1.62831	10.9148	5.95087	4.74154
gene12155	LOC105615767	0	0	0	0	0	0	0	0	0	0	0	0	0.105643
gene12156	DNAL1	3.09546	7.3056	4.22287	7.53738	7.59811	8.35443	7.57191	7.6467	7.29662	0.585519	7.84965	12.5809	9.41809
gene12157	PNMA1	0.613991	1.23925	0.914063	1.87269	1.04388	1.42557	0.817362	1.7178	0.164806	0.152086	1.79619	1.08235	1.26534
gene12158	ELMSAN1	5.02504	10.6041	7.64871	10.8953	6.69698	10.4305	5.37184	9.04169	5.74993	1.54933	11.7512	6.73723	9.89255
gene12159	PTGR2	17.6288	18.1498	21.8503	27.4411	28.9522	26.5386	22.2381	24.506	21.9478	6.74325	24.3922	30.5421	37.209
gene1216	C2CD4D	0.465347	0.253801	0.273849	0.398472	0.305411	0.207615	0.119569	0.469076	0.192872	0.142389	0.863554	0.233846	0.868745
gene12160	ZNF410	38.6072	59.0947	44.3923	124.949	67.6727	106.418	70.0346	98.8922	64.0861	50.7593	84.7041	59.8785	106.264
gene12161	FAM161B	3.4027	5.23571	5.98782	3.85585	2.52341	3.04663	2.59885	3.46665	2.23961	1.1053	4.16121	2.58195	3.58599
gene12162	COQ6	15.9284	21.0439	14.9774	24.017	16.5445	19.3773	12.8121	29.6688	12.3999	16.1351	24.5533	13.0505	21.3326
gene12163	ENTPD5	2.49415	5.4903	5.06468	7.29602	5.15479	7.30946	3.82871	7.26879	4.92064	1.6769	5.71887	5.1915	8.77235
gene12164	BBOF1	0.399429	0.338599	0.319678	0.558188	0.855653	0.952127	0.865392	1.0756	0.878081	0.0118727	1.29988	1.18291	1.91302
gene12165	ALDH6A1	1.72046	5.23011	7.93583	6.4254	3.39858	4.96595	3.49886	4.15998	2.60332	0.188629	4.05079	2.28898	4.25181
gene12166	LIN52	11.3517	22.1992	12.7225	35.3486	31.4842	44.4994	34.8033	37.7188	42.4442	5.31198	28.9835	37.2045	44.57
gene12167	VSX2	0	0	0	0.0538079	0	0	0.0645844	0.0452443	0.156267	0	0.122748	0	0.0533234
gene12168	ABCD4	15.1325	38.5591	14.1256	38.2369	15.5665	29.9143	15.9156	34.516	23.7444	15.5715	56.31	23.7232	43.0017
gene12169	VRTN	0	0	0	0.0444179	0	0	0	0	0	0	0	0	0
gene1217	THEM5	35.4707	28.2062	26.4725	35.1261	25.2356	30.5142	27.135	64.701	14.1166	8.9422	81.4904	60.6399	39.6268
gene12170	SYNDIG1L	0.186115	0.0896428	0.0846335	0.172407	0.188776	0.109995	0.11825	0.165679	0.119214	0.213741	0.0561858	0	0.585789
gene12171	NPC2	261.365	214.618	243.431	284.155	305.422	283.436	306.581	260.527	246.283	195.894	284.877	311.446	371.393
gene12172	ISCA2	4.9626	4.13868	3.9074	4.99439	5.16094	4.21533	5.64675	3.44961	4.61901	2.11703	4.06904	4.9286	5.92163
gene12173	LTBP2	8.4106	19.1176	14.824	16.4722	10.965	10.7482	8.49902	11.0059	8.04789	6.49743	13.6472	5.94213	12.6645
gene12174	AREL1	8.83323	21.055	14.2494	27.8829	18.0929	31.284	15.8615	23.0764	16.3758	1.38558	30.4276	18.9054	30.4575
gene12175	LOC105606507	0	0	0	0	0	0	0	0	0	0	0	0	0
gene12177	FCF1	64.8655	50.8369	38.8273	97.3648	127.048	130.999	135.95	130.679	141.066	114.695	139.006	152.648	165.131
gene12178	YLPM1	20.9057	31.0904	23.2383	31.5637	26.3603	33.4239	20.435	33.1229	27.7406	11.2097	33.7659	24.8368	36.0647
gene12179	PROX2	0.254242	0.13096	0.370927	0.843002	0.520051	0.703989	0.23445	1.17563	0.875787	0.283393	1.40713	0.985421	1.40594
gene1218	THEM4	5.65007	7.03794	6.52439	13.3346	9.12058	11.2799	6.80539	16.539	10.266	3.75194	20.8783	13.111	20.1167
gene12180	DLST	48.8021	79.7948	64.0193	58.1187	34.4969	42.2788	30.7194	53.9327	34.6743	31.0455	56.0235	27.2724	58.3414
gene12181	RPS6KL1	1.35216	4.71316	2.1359	4.21293	2.59381	3.2129	1.76155	4.87811	5.61609	4.30124	6.22328	3.03982	7.63134
gene12182	PGF	12.0594	14.2862	9.70532	15.1214	5.10666	9.91842	4.45054	11.5456	8.91763	23.0984	9.18553	7.59341	15.5594
gene12183	EIF2B2	69.4541	71.1429	61.3267	48.0609	33.0182	32.2393	38.0239	43.1226	36.256	66.5416	37.2368	32.7337	34.6757
gene12184	MLH3	4.48517	4.68778	4.4815	8.57035	7.64912	11.0097	6.71851	9.84917	7.04191	2.05931	10.8657	8.54108	8.76613
gene12185	ACYP1	8.48822	8.60953	6.59837	15.0279	13.8218	17.317	13.6284	13.9466	15.4099	16.4226	11.6813	12.63	16.7679
gene12186	ZC2HC1C	1.36005	2.06253	2.6128	1.6355	2.1772	1.9862	1.51534	2.07488	2.08323	0.776304	1.66911	1.90838	3.29842
gene12187	NEK9	14.6175	31.9542	28.8671	23.5085	14.8217	17.2953	14.4251	20.54	18.3741	11.9746	20.5814	12.5707	23.5668
gene12188	TMED10	98.8398	121.212	127.723	135.097	108.213	119.24	117.436	127.317	111.953	57.8619	119.642	107.201	116.299
gene1219	LOC105615685	0.0103263	0.0683883	0.0129133	0.180383	0.0691279	0.134264	0.0541275	0.252792	0.0727588	0	0.0685824	0.0441079	0.0297932
gene12191	FOS	5.57391	13.6883	19.1401	10.3068	8.06782	9.33656	8.73872	19.472	154.08	8.57505	239.074	273.519	45.9849
gene12194	JDP2	3.49495	5.60808	3.00354	5.93923	7.00861	5.68855	3.80647	8.59344	10.7614	3.04331	11.4269	5.41455	16.5912
gene12195	BATF	1.73712	2.78025	1.90078	3.68772	2.50345	2.82329	2.33961	2.83503	2.24395	3.92638	4.56679	4.43138	9.39732
gene12196	LOC101108756	1.50952	4.39873	2.33388	6.47232	2.60286	7.58313	3.4527	7.9618	5.64675	0.978963	7.42798	4.10313	13.7783
gene12198	LOC101110417	12.4157	3.79717	9.42377	6.64328	9.45449	9.72965	8.85771	6.77286	1.93081	0.0313281	12.2323	14.9914	16.1166
gene12199	LOC105615769	0	0	0	0.160565	0	0.0796754	0	0	0.362685	0	0.0610477	0.157048	0.0530399
gene122	CSMD2	0.208776	0.494409	0.126585	0.368381	0.557637	0.815732	0.906427	0.727919	1.71175	0.197454	1.81728	0.89177	1.14995
gene1220	S100A10	532.04	500.566	522.998	693.422	796.511	663.669	540.955	493.528	755.803	1219.4	744.507	521.331	999.901
gene12200	LOC105615770	1.16762	0.459791	1.85478	0.413441	0.281675	0.393217	0.758151	1.12018	0.266823	0.187604	1.02175	0.561645	0.569053
gene12201	LOC101110679	15.4069	9.2146	14.3932	9.86186	7.88379	7.22205	5.95031	6.99945	4.41413	2.49008	7.43857	5.75638	9.82561
gene12202	TTLL5	15.2779	23.9963	15.9588	32.8902	31.6299	45.355	25.8824	49.1359	44.0408	10.538	46.5992	41.7968	48.9191
gene12205	TGFB3	5.43059	8.34866	7.59268	7.98302	6.33716	6.3664	3.60875	6.86507	6.62402	5.21306	7.74562	2.96608	5.77924
gene12206	IFT43	20.3072	36.9296	11.6614	72.9723	58.518	73.5486	51.3613	90.3868	63.3704	28.8441	92.5075	51.3568	95.5327
gene12208	GPATCH2L	16.7474	36.7801	20.9186	74.7703	37.6565	50.1521	31.4624	35.723	41.3769	5.49866	47.38	34.2686	63.3374
gene12209	ESRRB	0	0.0625561	0	0.06875	0	0.102345	0.247557	0	0.266216	0.31586	0	0.268976	0.136262
gene12210	VASH1	0.441649	1.07997	0.977136	0.865448	0.843375	0.828226	0.460031	1.20592	1.0293	0.258766	1.25508	0.592543	1.37225
gene12211	ANGEL1	4.28154	5.34391	4.30737	4.67445	3.44497	4.32684	3.11702	5.66061	5.00859	1.84575	6.72164	4.16174	8.15613
gene12212	LRRC74A	0	0.150317	0	0.247801	0.0316547	0.153704	0.0495716	0.416726	0.119943	0.021083	0.329752	0.0807909	0.286498
gene12216	IRF2BPL	37.5996	53.414	55.0379	24.3742	20.9397	13.0643	13.1763	13.0115	16.9312	5.11317	21.081	8.00742	15.5807
gene12219	CIPC	7.0389	19.5512	20.3636	15.5991	6.79853	12.18	8.53561	8.74433	5.40373	2.30304	11.0767	5.38497	26.2949
gene1222	S100A11	1272.9	1040.14	1206.76	741.984	870.25	448.554	681.51	635.304	729.47	945.127	642.474	553.39	511.227
gene12220	ZDHHC22	0	0	0	0.0226758	0.03476	0.0675127	0.0544345	0.0190669	0.15366	0	0.0517286	0.0221791	0.224716
gene12221	TMEM63C	0.188523	0.385912	0.407211	0.224535	0.21034	0.334255	0.104807	0.419556	0.265666	0.331128	0.768323	0.488037	0.890055
gene12222	NGB	0.227179	0.250757	0.236745	0.165351	0.126735	0.205125	0.198468	0.0463451	0.426852	0	0.125734	0.269549	0.0546208
gene12223	POMT2	11.2711	15.7094	12.7814	12.6783	8.00253	10.8801	6.42267	10.2843	10.324	10.222	11.6113	6.85678	11.7881
gene12224	GSTZ1	14.9632	11.2023	8.78647	9.43248	10.3363	6.28775	7.34313	11.6581	11.9916	10.249	9.59219	7.7438	10.6615
gene12225	TMED8	2.92198	10.8485	5.14884	7.92698	11.2128	13.1437	7.85146	12.1386	12.3529	0.98697	12.3495	10.4008	15.8389
gene12226	SAMD15	0.651083	0.567361	0.921329	0.773186	0.994062	0.742584	0.883134	0.985686	1.18309	0.0763931	1.30864	0.658669	1.13698
gene12227	NOXRED1	0.0715757	0.221212	0.0596716	0.382038	0.266196	0.620424	0.166746	0.408846	0.302592	0.567341	0.198072	0.10191	0.585106
gene12228	VIPAS39	17.0842	26.1439	17.0677	30.1467	20.5681	28.6777	18.4855	29.7283	20.7692	18.1714	29.7826	20.6809	32.1313
gene12229	AHSA1	124.941	145.239	122.66	132.161	112.096	101.544	109.15	143.998	116.608	170.454	120.991	60.0038	105.121
gene12230	ISM2	0.634768	1.20862	0.644959	0.808524	0.973812	1.59049	0.797159	1.94242	0.894511	0.589624	0.592851	0.903787	1.0874
gene12231	SPTLC2	15.6972	26.5705	25.8209	28.2119	20.2397	22.6111	18.2631	23.7894	21.6674	8.84577	26.4294	17.9818	35.113
gene12233	LOC101115626	0	0	0	0	0	0	0	0	0	0	0	0	0
gene12235	ALKBH1	8.77339	17.0416	9.07131	19.9775	13.9721	18.7466	18.5834	20.7577	14.47	6.84735	16.7645	14.0618	22.131
gene12236	SLIRP	318.79	246.694	205.387	416.961	572.829	562.162	636.921	459.159	570.977	372.855	377.691	716.737	423.868
gene12237	SNW1	80.6698	72.7991	73.6179	126.289	119.467	141.454	128.756	118.763	106.56	45.3433	122.402	74.002	123.42
gene12238	ADCK1	4.12118	6.36847	3.90103	11.9567	5.93922	11.7525	4.90046	13.6619	12.825	2.74346	13.5904	10.5538	13.9546
gene1224	LOC105613035	0.378136	0.404539	0.581993	1.33378	0.827564	1.32369	0.660693	1.08591	0.819795	0.248572	0.676146	0.538392	0.671377
gene12241	NRXN3	3.48502	13.4439	0.986142	13.8863	6.61298	14.6081	19.0675	15.1324	22.512	5.33069	9.92567	33.43	11.853
gene12246	DIO2	130.7	119.813	167.285	131.037	117.15	142.43	84.1166	177.473	111.481	124.607	124.482	76.043	106.164
gene1225	TCHHL1	33.2629	59.3768	82.5636	93.7061	49.2748	52.663	38.8477	45.975	23.9985	4.64605	33.002	26.2465	14.0833
gene12250	CEP128	4.39375	9.42079	4.02824	12.7919	16.1443	18.4424	17.1887	20.3135	21.3349	2.18306	21.0516	19.0244	22.491
gene12253	TSHR	1.26743	2.0098	0.513438	2.07886	1.2946	2.28235	2.30807	0.764755	1.60997	0.291836	1.42271	2.26207	2.57518
gene12254	GTF2A1	21.7432	30.9804	33.0404	47.7382	38.2078	48.6898	44.6261	39.6618	38.8403	6.0197	46.1154	47.8529	59.8879
gene12255	STON2	8.31729	19.8881	16.5341	30.5149	19.5294	31.6159	19.4163	31.9191	21.5201	3.36568	21.6491	19.737	24.736
gene12256	SEL1L	6.5889	19.3562	19.4273	21.1847	12.5446	14.6058	11.9216	14.7425	10.7119	0.696255	12.4958	9.40283	16.8083
gene12258	LOC105615807	0	0	0	0	0.0929726	0	0	0.101997	0	0	0	0	0.12021
gene1226	LOC101120969	3174.58	2988.23	3083.32	2760.54	1979.63	2267.65	3416.27	1657.51	1930.02	3113.38	1048.41	1381.18	1097.65
gene12261	LOC101113416	0	0	0	0	0	0	0	0	0	0	0	0	0
gene12263	FLRT2	23.4807	36.328	24.8073	52.1268	63.1892	73.3134	46.0923	54.6794	54.4786	14.086	74.0692	40.2933	81.7781
gene12264	GALC	6.56086	11.0563	15.2312	10.2834	10.7627	10.3288	7.77467	16.3395	10.4584	1.15851	20.5197	12.8791	21.6936
gene12266	GPR65	0.135099	0.268418	0.4646	0.983315	0.942085	0.914884	0.383582	0.702797	0.809119	0.42667	0.61687	1.53884	0.877015
gene12268	KCNK10	0.424894	2.30744	0.425074	4.45331	3.08142	3.59094	1.96733	4.78472	6.22708	0.0947222	3.17469	2.66185	7.29406
gene12269	SPATA7	8.95352	21.8778	8.38911	38.5171	26.659	37.9651	25.1003	29.8681	30.658	12.1946	31.4188	27.551	44.2236
gene1227	RPTN	1.7061	2.84873	1.93958	19.1159	2.65342	10.5201	5.41994	15.9217	7.09613	9.19742	8.9104	6.74276	2.31204
gene12270	PTPN21	34.6414	61.4231	48.3025	56.6184	40.9082	50.2627	36.1199	72.5725	49.2175	17.6941	79.9895	40.7682	71.0253
gene12271	ZC3H14	17.4106	22.6454	21.3629	32.8128	26.6871	30.4553	26.0576	30.5968	21.7468	17.3384	32.7143	19.0971	39.2294
gene12272	EML5	4.50101	7.41353	5.88449	16.7844	14.3727	17.0058	9.97724	13.5497	12.6856	1.37373	22.7963	17.5923	24.2859
gene12273	GSTA1	0	0	0	0	0	0	0	0	0	0	0	0	0
gene12274	TTC8	5.0009	11.2912	4.7793	10.5152	11.1744	11.2776	8.72592	10.6001	9.31992	1.85306	16.0892	9.30078	14.0374
gene12276	FOXN3	15.282	24.9547	10.4809	65.1697	40.591	56.8055	38.0485	65.7711	46.9977	3.68726	66.6716	41.7362	63.6005
gene12278	EFCAB11	8.28422	8.5033	4.49479	18.3967	14.9474	19.1808	14.2562	20.7036	15.7234	10.241	16.6751	15.3528	16.6783
gene12279	TDP1	11.9341	16.7772	12.4479	23.729	14.6164	16.7217	12.6058	19.9857	14.3712	8.28376	14.0957	10.8516	13.5771
gene12281	PSMC1	258.629	200.233	200.164	112.08	117.339	89.4818	104.261	120.538	109.803	301.187	134.272	86.4338	105.673
gene12282	NRDE2	12.8033	20.7617	13.1204	15.4832	10.0539	13.6769	8.20355	13.3948	10.917	2.76436	16.0413	8.51051	14.1976
gene12284	CALM1	854.046	847.05	830.093	590.362	658.192	407.807	524.818	598.904	779.433	523.271	643.046	464.214	651.231
gene12287	TTC7B	18.8468	38.2011	10.3377	73.7517	39.2853	60.4768	34.3177	70.5658	56.3125	6.33785	66.299	37.9895	60.5838
gene1229	LOC105613042	155.719	151.989	153.668	161.823	76.0133	76.3102	223.26	276.522	69.1559	53.4752	108.627	262.876	80.747
gene12290	RPS6KA5	10.0534	24.6397	12.1677	48.1411	26.8421	37.8284	29.5424	42.3037	39.6088	2.33004	53.3228	34.394	69.4722
gene12291	LOC101115969	39.6134	67.7371	60.5536	83.3645	62.2063	71.5161	52.3884	81.7277	69.9842	25.249	86.2442	54.3243	100.321
gene12293	CTDSPL2	13.6618	21.5861	20.8522	32.0502	29.0205	34.7702	30.0304	25.7274	24.7654	5.26654	27.6864	27.5064	35.8486
gene12294	EIF3J	172.333	163.844	189.229	195.941	173.671	168.052	178.752	173.477	155.133	51.9936	189.195	103.928	164.895
gene12295	SPG11	13.485	23.3115	21.1545	28.0494	15.1928	24.5538	13.3136	23.8609	14.9005	10.24	22.7641	13.7064	22.5555
gene12296	PATL2	0.968645	1.09973	0.519136	1.88007	0.874886	1.47435	0.866374	2.31482	1.26751	0.18852	1.83808	0.985116	1.39735
gene12298	B2M	2309.15	2538.26	3263.05	3353.84	4982.48	3867.62	4035.06	4050.48	3987.85	870.169	5205.2	6577.65	5540.66
gene12299	TRIM69	0.21376	0.113254	0	0.622338	0.238498	0.972768	0.224094	0.104659	0.301229	0	0.638862	0.730447	0.246694
gene12300	C7H15orf43	0.0619373	0	0	0.450808	0.207315	0.469768	0.0541095	0.0758124	0.174563	0.552311	0	0.617306	0.357399
gene12302	MB21D1	1.73802	5.32891	2.53569	5.85654	4.02195	4.74279	4.75193	3.03347	2.72135	0.119586	2.93922	2.19965	2.97155
gene12303	MTO1	3.79514	7.52928	4.91173	9.93939	8.04339	10.8997	7.07984	9.91949	8.75779	3.41132	10.2088	7.85756	11.4517
gene12304	EEF1A1	273.123	334.468	357.7	455.495	389.79	412.344	394.563	364.547	300.678	87.1119	359.008	293.015	315.838
gene12306	SLC17A5	21.5521	31.854	25.2807	61.3117	47.9213	62.3904	38.1732	59.3285	50.711	11.2141	62.6959	45.3429	66.8577
gene12307	CD109	11.831	19.9979	21.5199	35.7166	20.9552	28.9738	25.1816	27.7942	18.4151	3.51666	31.9437	20.8648	39.1575
gene1231	LOC101120378	95.278	103.574	98.8445	91.0509	63.4176	108.689	183.376	123.697	36.1382	5.07324	101.044	153.22	138.192
gene12313	COL12A1	25.1633	59.5311	50.9355	51.6097	29.6606	31.2301	24.5893	34.4141	43.9197	12.9398	34.9483	24.9243	51.145
gene12314	LOC101110066	106.98	73.9846	69.9983	118.003	142.466	176.178	160.349	98.0639	145.418	138.065	120.645	216.851	146.645
gene12315	TMEM30A	45.6429	59.6645	67.7605	80.6812	72.6872	76.5116	83.6078	61.5241	54.9932	29.8985	76.9465	80.9479	87.5675
gene12316	FILIP1	11.6434	16.9878	12.5792	26.6136	23.4144	29.0462	19.5474	24.5173	32.9397	8.60555	29.4894	29.1815	49.9545
gene12317	SENP6	27.8188	44.3146	34.7782	69.9555	83.0163	92.4272	85.8954	87.0141	106.697	24.9631	116.288	138.824	135.755
gene1232	LOC105614079	191.671	122.741	145.576	315.825	160.08	276.431	391.97	805.264	133.278	1.69472	325.542	1012.29	178.964
gene12320	MYO6	38.4001	42.1967	51.7283	63.2716	45.6857	64.1378	43.1525	60.4129	40.9753	7.11575	57.9962	39.7391	67.1476
gene12321	IMPG1	0.56684	0.59366	0.362667	1.72705	1.14721	2.14248	1.08253	1.08107	0.854517	0.666118	1.79479	0.750763	1.61642
gene12325	HTR1B	2.31023	6.38609	5.74212	5.598	5.07511	5.19288	4.19948	2.8102	2.44672	0.959668	5.12242	2.26779	1.8009
gene12327	MEI4	0.869845	3.51265	1.1143	5.89877	8.85293	3.95384	5.20818	6.64792	11.2413	0.945931	7.1157	6.73618	12.028
gene12328	IRAK1BP1	6.49534	7.46156	5.06409	10.535	10.96	11.0128	10.9986	7.50872	5.28286	4.17123	9.85272	5.13783	7.23
gene12329	PHIP	22.5644	30.8643	22.3139	49.5738	54.2966	61.1906	64.1651	50.9324	46.4485	4.88702	51.5865	48.944	50.7231
gene1233	LOC101120628	228.216	296.316	423.814	280.384	155.729	244.782	305.393	192.428	35.524	0.107289	361.602	191.357	188.147
gene12330	HMGN3	145.424	130.694	139.82	175.421	201.376	142.744	131.478	191.089	133.684	93.0507	207.46	149.39	177.894
gene12333	LCA5	1.00194	1.86101	1.19535	2.8835	2.49277	3.31923	2.89759	1.97351	1.97994	0.051348	2.8874	2.4432	3.07352
gene12334	SH3BGRL2	16.6632	38.5259	37.1187	58.1096	28.8299	53.2311	41.0672	46.6718	40.2411	4.62806	57.2598	43.5355	51.3738
gene12337	ELOVL4	361.025	132.855	296.185	213.418	252.087	190.726	249.122	259.973	60.0737	3.53	399.218	326.354	161.04
gene12338	TTK	3.19942	5.69954	4.4821	9.88955	7.25231	9.53317	9.57047	5.86183	5.23626	1.3618	4.08506	4.38237	5.24349
gene12339	BCKDHB	100.162	80.7013	75.2696	145.805	153.709	167.52	164.395	168.628	153.069	23.5029	287.38	234.775	209.096
gene1234	LOC101121219	60.8655	50.5321	50.7981	23.2042	37.7932	26.483	19.3568	15.9992	20.4039	67.7355	11.8219	17.1732	7.35849
gene12343	FAM46A	24.6154	23.2498	33.7833	42.5531	37.3709	32.342	23.6908	42.6347	56.1866	18.1389	57.3028	26.6355	63.7165
gene12346	IBTK	17.2729	28.2959	25.045	34.0641	31.0324	32.6947	31.9724	30.2426	31.3519	11.2794	36.357	33.7581	42.8404
gene12348	TPBG	28.7343	23.2072	30.4355	19.8939	24.8799	15.7395	18.7019	19.8862	15.6671	19.6955	25.2831	14.8771	20.7718
gene12351	UBE3D	7.76649	11.7603	5.25179	27.3289	23.7493	39.2703	23.0521	37.861	46.3181	3.94729	45.9774	37.8155	47.5264
gene12352	DOPEY1	4.65923	9.85886	7.63437	13.9015	11.2264	13.3637	10.9265	12.7508	9.96505	2.92822	12.29	10.5977	14.9443
gene12354	PGM3	11.5022	19.3264	11.9926	36.7417	25.568	35.0294	19.4031	25.3491	25.3288	16.4825	37.3656	22.0731	41.1639
gene12355	RWDD2A	0.983747	1.22748	1.19455	1.18298	0.986242	1.00411	1.07116	0.994712	1.3662	0.762811	1.13628	0.872878	1.15177
gene12356	ME1	41.3377	59.0595	87.4636	86.4402	74.1077	73.7604	52.061	101.243	80.2365	21.8558	72.2454	82.3831	87.1049
gene12358	LOC105612109	0	0	0	0	0	0	0	0	0	0	0	0	0
gene12359	PRSS35	0.363123	0.303773	0.740894	1.11283	0.319852	0.103539	0.36732	0.397683	0.484779	0.695899	0.507725	1.30615	0.523837
gene12360	SNAP91	0.0293549	0.0388818	0.0367091	0.128195	0.196512	0.127225	0.256449	0.359309	0.1241	0.0654412	0.146221	0.501547	0.444643
gene12363	C8H6orf58	0	0	0	0	0	0.0819007	0	0	0	0	0	0.322869	0.0545213
gene12365	SOGA3	0.061317	0.243651	0.0255596	0.0743822	0.205239	0.0885835	0.0267838	0.21265	0.0432038	0	0.118778	0.26191	0.280108
gene12366	KIAA0408	1.5378	3.06435	1.51463	6.3195	6.62012	7.10726	4.68425	8.17883	5.31218	0.566318	6.46243	7.80868	16.6283
gene12367	ECHDC1	101.489	134.88	207.657	303.554	299.863	272.006	257.815	217.776	158.075	14.1283	249.766	278.714	266.647
gene12369	RNF146	20.8765	31.9579	33.0817	57.7173	44.9135	61.2636	49.6187	38.9735	39.5248	11.0844	56.2545	42.7935	63.3588
gene12370	RSPO3	5.03283	5.72688	3.23267	5.46139	6.02364	9.44382	8.13403	4.00418	6.06064	2.37995	2.58289	3.74574	2.5741
gene12373	CENPW	8.21718	10.258	8.91178	13.5495	10.7097	13.1975	13.9762	8.27781	8.55661	17.7783	6.21813	5.7463	7.9726
gene12374	TRMT11	4.88184	7.08903	4.47922	13.0453	11.9428	15.7937	13.3745	12.0525	12.1024	5.28229	13.2034	13.685	15.8805
gene12375	HINT3	29.095	24.4123	38.196	39.316	34.0786	35.6066	34.9876	25.3262	19.0301	6.41727	31.5643	38.9499	25.5009
gene12376	NCOA7	6.19514	12.0558	8.88694	25.0825	19.5819	25.0751	18.7866	25.7037	26.5896	2.68164	27.8732	32.284	45.1648
gene12379	HEY2	1.71644	2.56112	2.10767	2.95017	3.56482	3.96605	2.09571	2.6705	3.56992	1.02194	4.68697	2.73833	5.47431
gene1238	LOC101121728	38.5386	52.2488	34.0636	19.8261	18.1224	32.4655	40.719	5.80388	11.9422	65.8979	10.7206	24.2756	4.6572
gene12381	HDDC2	33.4203	35.8014	25.3089	73.1683	48.3554	52.2971	48.7385	69.8353	79.7437	201.251	60.6858	66.2574	81.7293
gene12382	TPD52L1	6.3127	8.47355	4.86775	8.94299	7.17542	12.5795	9.13728	7.08468	7.7749	3.72262	11.2683	9.18083	8.76481
gene12383	RNF217	14.7047	28.6181	14.6658	64.4136	69.7021	84.4532	61.3943	73.21	85.3662	3.18429	81.1102	92.2241	129.034
gene12385	NKAIN2	0.490431	1.87384	0.28306	4.613	6.31368	3.65839	4.00435	5.63355	13.0248	1.93434	8.17434	8.24505	10.5307
gene12386	TRDN	1.74071	1.64055	1.67446	1.16951	3.77225	1.66845	0.97969	2.64283	11.8168	1.54228	5.16908	5.74328	16.2257
gene1239	LOC101121986	52.4352	87.0605	61.6136	39.7773	25.7791	13.9463	19.3556	10.0728	5.05494	25.088	12.963	51.2237	3.19615
gene12390	CLVS2	0.501816	1.53165	0.218273	0.381125	0.778975	0.803764	0.724306	0.694349	1.16834	0.129705	0.507169	0.559164	0.818336
gene12391	SMPDL3A	4.06011	6.61883	7.42064	8.1135	5.87019	11.2452	6.29642	5.99886	3.55476	2.55292	6.1031	5.02827	6.37691
gene12393	FABP7	48.8006	23.8051	32.892	59.5808	80.2084	112.717	96.8986	8.83146	11.4616	10.9182	12.7422	13.5416	7.28592
gene12394	PKIB	43.6481	37.3195	54.6821	109.507	67.2871	122.671	130.16	35.359	48.7384	28.23	38.7002	46.9337	44.2418
gene12396	SERINC1	111.214	143.469	165.889	219.259	243.444	249.89	276.121	184.087	204.405	69.9492	242.137	249.989	281.044
gene12397	HSF2	15.0987	21.5516	18.0604	38.0538	37.7204	40.5942	39.4691	36.2447	34.7238	11.3593	33.0498	38.9561	65.7832
gene12399	LOC105615953	0.0491812	0.0434285	0	0.143185	0.0548727	0.0532883	0	0.0401324	0	0	0.0544397	0.0233415	0.0709481
gene124	LOC106990793	1.08847	1.44173	0.935801	3.56508	5.16135	5.60201	5.88375	7.74405	10.3536	1.56714	17.9598	5.81164	8.53804
gene1240	C1H1orf68	31.4216	15.242	26.9911	3.03777	4.19098	3.87616	6.45894	30.4328	6.80571	0.088613	42.1731	20.459	26.0617
gene12401	GJA1	825.052	1102.57	1211.26	1405.83	999.442	1014.29	1080.19	1093.81	990.173	543.612	720.958	815.885	788.656
gene12402	TBC1D32	2.86843	5.47718	3.70487	9.4026	10.5472	12.6587	13.9929	14.1978	11.4331	1.59477	12.5672	17.9312	13.1388
gene12403	LOC101122794	55.8662	55.5654	56.1105	24.0612	30.9006	15.2248	22.861	33.4013	29.7973	15.0824	26.6556	19.6198	25.1666
gene12405	MAN1A1	3.56856	17.564	12.1707	12.8097	20.9483	19.7283	15.021	33.8518	55.1452	3.16409	54.4038	48.7885	80.9047
gene12406	FAM184A	0.387055	0.751918	0.387218	0.926533	1.34352	1.26745	0.924244	1.55815	0.703005	0.492153	3.7417	1.66552	3.07718
gene12407	MCM9	7.21537	10.861	8.31585	15.0462	12.1515	17.5194	14.1348	14.241	14.7869	2.98828	16.9358	18.802	22.0413
gene12408	ASF1A	0	0	0	0	0	0	0	0	0	0	0	0	0
gene1241	KPRP	36.7052	45.1763	46.9748	39.1041	13.5118	36.335	26.0647	63.1739	16.4762	11.3554	53.6328	43.8592	40.5943
gene12411	CEP85L	2.42712	3.64267	2.68897	4.88998	7.36206	7.69946	6.90131	6.755	9.50658	1.48129	10.2204	10.7746	16.8543
gene12412	PLN	0	0	0	0	0	0	0	0	0	0	0	0	0
gene12416	SLC35F1	2.5136	5.01278	2.47228	4.72796	7.07425	11.0471	8.14221	7.31147	8.09919	0.54567	8.37053	5.54928	9.77822
gene12419	NUS1	11.7203	22.284	20.6431	25.1712	19.5843	25.9496	21.7641	23.2868	24.0764	7.60541	24.8734	23.4251	29.1318
gene12420	LOC101102818	0.0122872	0	0	0.107318	0	0.106506	0.118078	0.0751988	0.121205	0.0456534	0.122409	0.0874729	0.053176
gene12421	GOPC	23.16	38.6064	33.2251	49.3094	39.5673	53.6955	41.1041	44.4245	38.1874	7.13105	48.1334	36.9112	53.3284
gene12422	DCBLD1	30.7894	45.8882	41.5241	58.0389	42.3814	48.9734	35.8193	50.9201	47.6135	23.5545	37.4952	36.3	48.1486
gene12423	ROS1	0.0351241	0.130266	0.0263542	0.224972	0.195944	0.350128	0.441865	0.240758	0.257383	0.0313211	0.373244	0.320063	0.263482
gene12425	VGLL2	0	0	0	0	0	0	0	0	0	0	0.0476284	0	0.0413809
gene12426	RFX6	0.0951062	0.230949	0	0.0230742	0.212225	0.068699	0.207716	0.194019	0.134023	0.200242	0.0526375	0.135413	0.320131
gene12427	GPRC6A	0	0	0	0	0	0	0	0	0	0	0	0	0
gene12428	FAM162B	0.869752	1.51345	0.767753	1.91155	2.85413	2.51303	3.23301	2.73454	1.77839	2.91476	2.54845	2.40387	3.05062
gene12429	KPNA5	1.13018	3.33941	2.21059	4.15518	4.31641	5.87163	6.07599	3.45841	2.61357	0.226112	4.47481	3.42462	4.24318
gene1243	LOC105605549	3.81883	4.04657	4.93475	4.44724	1.42026	2.34472	1.55689	3.42783	2.15259	4.91884	4.64986	2.35615	2.7545
gene12430	ZUFSP	12.1907	18.6515	12.1025	29.335	27.1473	34.9626	31.9499	23.2959	22.0873	10.6489	22.8023	23.0956	32.1574
gene12431	RSPH4A	0	0.0398112	0	0	0.0335348	0.162833	0.131289	0.110369	0	0	0.149716	0	0.173436
gene12432	LOC106991298	0.0332161	0	0	0	0	0.07198	0.0580364	0.121971	0.327655	0	0.110303	0	0
gene12433	LOC101104832	0	0	0	0	0	0.0403622	0.130174	0.0911926	0	0.110727	0	0.0530386	0.0537383
gene12434	RWDD1	22.4868	15.142	16.5737	30.7223	37.7738	46.6876	41.5945	61.7373	34.2552	29.4526	49.4346	38.6348	60.5289
gene12435	TRAPPC3L	10.7442	10.1474	12.0959	20.1011	13.0574	18.9849	11.7186	18.1331	13.3524	12.2241	14.6868	10.1851	15.269
gene12436	FAM26D	0	0	0	0	0	0	0	0	0	0	0	0	0
gene12437	FAM26E	0	0	0	0	0	0	0	0	0	0	0	0	0
gene12438	DSE	15.6082	27.722	20.9886	33.0564	31.4115	38.7676	25.0143	24.766	46.3441	14.2653	33.2098	23.4343	44.2512
gene12439	TSPYL1	22.7728	31.5741	35.8838	15.5281	15.6535	10.8495	15.6841	15.7779	15.2427	6.24706	18.9833	13.9112	15.1997
gene1244	LOC105613519	103.565	48.3939	88.6718	40.7099	16.0038	15.6395	29.4756	43.8377	15.0011	7.17303	82.9826	83.4897	25.3773
gene12440	TSPYL4	27.8348	37.7661	40.7604	23.7462	21.5175	14.7375	20.4682	18.1947	13.0459	8.25305	17.7499	10.6371	13.4439
gene12441	NT5DC1	5.15433	9.9168	6.63383	9.39259	10.2423	10.0485	9.49885	10.5457	10.1264	2.66996	12.2438	13.7937	10.4206
gene12442	COL10A1	0	0	0	0	0	0	0	0	0	0	0	0	0
gene12443	FRK	0.0842314	0.409084	0.263334	0.265666	0.140969	0.410695	0.233023	0.670155	1.76069	0.34426	0.675972	0.759551	0.546799
gene12444	LOC101107200	33.0854	30.7707	27.9918	44.0081	46.9139	52.3715	56.8342	47.374	49.3885	75.2489	39.6831	41.9013	51.0091
gene1245	LOC101122647	14.4241	7.05081	14.8168	3.49952	2.77802	3.81414	4.72544	17.3401	2.78278	0.829418	17.6771	18.3367	10.2802
gene12451	HS3ST5	0.490322	0.316807	0.269193	0.905254	1.56114	0.829298	0.741784	2.38601	1.12913	0.311039	1.27082	2.77546	1.56993
gene12453	HDAC2	72.163	98.1459	91.9809	101.834	101.494	106.753	106.779	91.1781	91.68	41.2013	87.291	77.35	95.1173
gene12454	MARCKS	125.433	143.631	159.944	105.677	119.141	81.0893	110.463	84.6876	104.198	45.1202	86.8227	93.2197	107.558
gene12456	RFPL4B	0	0.105976	0	0.349405	0.357072	0.346762	0.489281	1.07726	0.450992	0	0.265691	0.227834	0.461679
gene12459	LAMA4	16.1863	41.2306	26.6169	34.8093	39.7659	32.1479	20.4524	43.9553	52.411	24.8567	53.5349	36.4533	68.2685
gene12461	FAM229B	29.903	21.4206	20.3508	29.3158	44.7116	37.0288	47.1827	45.0675	49.0189	70.1398	46.9483	77.1871	66.9073
gene12462	TUBE1	3.65019	12.9642	7.31154	19.7024	14.8848	19.8451	14.9284	19.1368	13.4286	0.840145	13.9986	12.6479	23.486
gene12463	WISP3	0.480878	0.583866	1.16929	0.952792	0.491817	1.4618	0.77019	0.948305	1.12942	0.109188	1.50817	0.304301	0.790056
gene12464	FYN	35.0219	55.422	54.9085	90.2005	57.5307	91.7617	45.4053	88.8351	71.666	31.966	70.9779	48.0914	104.147
gene12466	TRAF3IP2	25.7972	38.9295	28.3012	57.0454	39.0928	48.3937	30.7593	79.857	51.5456	8.13851	100.37	75.836	95.2893
gene12468	REV3L	3.34939	7.38611	6.48008	9.21368	10.2187	11.2564	9.84343	11.6056	13.8061	2.42765	12.099	13.8471	23.2795
gene12469	KIAA1919	0.353264	1.0918	0.917516	1.1076	0.626591	0.942192	0.466884	0.853716	0.548876	0.0201933	0.85727	0.631949	1.00616
gene1247	SMCP	0.570326	1.51084	0.305661	3.20227	0.0909038	0.706233	0.142356	0.99727	1.03333	0	1.62336	1.27605	0.117535
gene12470	SLC16A10	1.58346	2.71145	2.58669	4.38163	4.71121	4.76066	3.93815	6.50425	5.51818	1.20318	9.09541	10.1962	9.2297
gene12471	RPF2	3.23488	5.06379	2.28315	7.42023	6.2068	8.25806	7.09724	6.49427	6.80333	3.81521	6.3884	5.00711	8.48472
gene12472	GTF3C6	9.10931	14.8363	15.8215	20.0379	16.2616	18.5337	17.8909	15.0318	16.5927	3.86094	17.4217	13.2581	17.9593
gene12473	CDK19	19.149	37.6194	31.507	57.2962	49.977	67.8325	53.9161	49.415	41.2325	7.52846	55.789	52.4059	61.0234
gene12474	AMD1	0	0	0	0	0	0	0	0	0	0	0	0	0
gene12476	SLC22A16	1.61495	5.09604	0.74248	5.08204	4.87558	8.56897	2.9047	8.08135	7.8983	1.83542	9.14844	4.32824	9.1818
gene12477	DDO	0.285864	0.28398	0.148951	0.381453	0.664471	0.490417	0.166491	0.437379	0.570687	0.212427	0.514198	0.440933	1.27152
gene12478	METTL24	0.746692	1.40862	1.64115	2.20685	3.78683	3.40781	2.47092	4.92987	5.70757	0.100886	5.22216	5.92783	4.86358
gene12479	WASF1	3.73089	7.9653	8.10339	6.53867	10.7079	9.68063	6.17566	8.20199	12.21	2.48061	12.8785	9.68054	12.2868
gene1248	IVL	302.542	336.632	329.565	305.224	184.408	144.688	211.248	214.989	142.132	350.784	117.658	64.4263	84.7022
gene12480	CDC40	0	0	0	0	0	0	0	0	0	0	0	0	0
gene12482	GPR6	0	0	0	0	0	0	0	0.0719806	0	0	0	0	0
gene12483	FIG4	7.19112	16.9333	10.5391	27.8318	17.3839	30.7131	22.7027	25.987	21.1521	2.70015	27.9548	18.4731	28.8162
gene12484	AK9	0.018273	0.133119	0.148531	0.478798	0.142714	0.287085	0.279363	0.190115	0.180251	0.0814725	0.591633	0.260172	0.487667
gene12485	ZBTB24	5.12641	9.1026	9.90387	9.68042	7.41962	8.46075	7.12682	6.25539	6.66496	2.61826	8.88073	4.40652	10.532
gene12486	MICAL1	63.0765	85.6764	54.3941	62.6137	29.288	34.4341	19.6415	35.092	25.692	37.5365	40.7734	16.8299	30.2147
gene12487	SMPD2	48.8399	44.0785	32.8132	27.1837	23.8269	27.03	21.5847	31.2971	19.2305	56.1833	37.5254	17.1119	31.0834
gene12488	PPIL6	0.690646	1.42446	0.481189	3.00174	2.63095	3.7523	2.13762	4.89103	3.12832	0.938464	4.8982	3.21695	5.39434
gene12489	LOC105609801	0	0	0	0	0	0	0	0	0	0	0	0	0
gene1249	LOC106990801	91.082	62.9481	72.3088	24.3188	21.0224	18.3491	28.5895	57.7972	20.2095	0.736922	70.549	89.3879	22.4492
gene12490	CD164	206.921	272.496	349.67	420.542	357.558	413.943	442.535	354.972	365.54	112.46	419.187	423.104	556.585
gene12491	LOC101108397	1.12346	1.72059	0.913201	3.24017	4.52035	4.23007	3.33703	2.57839	4.34385	1.08531	3.49759	4.70881	4.77092
gene12493	CEP57L1	22.3925	24.8072	18.4114	48.4463	65.1719	61.9175	65.6868	47.6511	50.1797	8.42175	43.3199	62.7413	58.7778
gene12494	SESN1	41.2383	63.8422	48.8671	122.219	122.274	126.259	109.968	83.6967	85.9828	24.8554	97.0532	95.8552	137.867
gene12495	ARMC2	3.14562	6.86407	4.00934	12.3282	9.58404	12.9123	7.31057	15.179	11.1956	3.2066	13.2247	10.0198	19.2567
gene12496	FOXO3	27.2414	51.2441	54.0397	39.8488	38.1161	51.966	24.7288	37.4169	26.1966	7.15435	36.6121	20.9725	41.2181
gene12497	LACE1	9.30277	14.3972	6.77594	35.5893	32.8497	43.4309	35.1032	36.4376	40.2482	3.20178	36.583	45.4524	50.0544
gene12498	SNX3	152.964	201.436	203.031	166.756	179.829	131.194	174.031	143.825	155.613	46.3812	138.388	133.901	160.273
gene125	HMGB4	0	0	0	0	0	0	0	0	0	0	0	0	0
gene1250	SPRR4	420.129	362.336	473.552	116.831	131.166	72.671	122.191	204.407	47.0449	6.496	228.604	190.024	80.4473
gene12500	NR2E1	1.05341	1.39529	1.13769	1.11523	1.33559	1.86771	1.79873	3.45792	3.5762	1.20977	4.69067	2.52248	5.59502
gene12504	OSTM1	13.1824	16.2538	19.701	25.3208	23.361	23.9371	28.163	21.7619	24.0554	11.1351	26.8975	30.5036	34.9663
gene12505	SEC63	32.8806	49.1126	48.0129	62.6445	54.9875	65.815	60.0792	54.864	59.309	16.9277	58.0884	50.1714	62.8394
gene12507	SCML4	0.400621	0.439347	0.382474	0.74622	0.812259	0.896158	0.583316	0.870006	0.983413	0.14405	1.15155	1.12854	2.05072
gene12508	SOBP	2.97519	3.6877	2.67949	3.59589	9.30372	4.6876	3.55301	3.94238	6.26969	1.7038	5.21187	5.2271	6.04419
gene12509	PDSS2	20.9113	28.988	20.4545	60.6307	59.8943	64.2483	56.7075	71.8787	71.8941	8.02509	56.0764	70.1516	68.5149
gene1251	LOC101102105	2438.74	2326.86	2861.32	889.959	816.614	486.286	886.357	847.227	556.371	1028.49	983.68	1072.27	469.43
gene12511	BEND3	2.24185	5.55978	3.39998	6.94348	3.56566	7.77817	4.47959	4.69993	4.63796	0.921576	4.27671	3.73526	3.50929
gene12512	C8H6orf203	11.7846	11.321	13.0096	15.2696	12.6186	13.6107	14.2173	14.7416	15.5727	11.1951	13.8331	10.9402	13.7622
gene12515	CD24	222.116	224.643	186.939	352.409	374.682	418.175	367.476	283.576	343.125	161.833	235.848	282.801	267.715
gene12518	QRSL1	7.07151	12.6214	10.0812	20.8195	13.038	19.4425	17.4214	16.3808	12.1076	6.58173	13.532	12.8876	18.1582
gene12519	RTN4IP1	45.996	59.7066	41.1284	99.4836	82.3477	114.557	75.042	94.7805	70.8151	46.6873	85.2849	93.2414	73.2606
gene12520	AIM1	55.9663	82.7311	97.9015	106.325	70.3573	98.3509	69.8897	104.006	64.3013	25.2066	79.4051	66.5072	77.0824
gene12521	ATG5	66.3931	108.752	87.8703	157.242	149.188	173.194	175.627	128.277	137.919	37.4589	133.699	152.166	145.123
gene12525	PRDM1	35.3606	48.6658	51.2302	44.1036	31.499	45.6157	42.6771	41.4329	26.4285	10.7001	41.6825	42.919	41.3909
gene12527	PREP	48.3869	59.2109	49.4411	65.0735	60.1771	68.5162	46.805	65.633	50.8074	10.4998	60.4979	51.5582	77.3852
gene12529	POPDC3	0.0936749	0.248153	0.292858	0.204543	1.30644	0.761233	0.20459	2.63717	0.990045	0.765713	4.19947	1.20037	1.48648
gene1253	LOC106990750	0	0	0	0	0	0	0	0	0.324882	0	0	0	0
gene12530	BVES	0.0798331	0.407864	0.270977	0.232425	0.521706	0.333643	0.239121	0.572343	0.353572	0.0677992	0.568086	0.324762	0.42776
gene12531	LIN28B	0	0	0	0	0.219549	0.355349	0.343815	0.321144	0.924321	1.21855	0.217816	0.560343	0.378489
gene12532	HACE1	17.7312	32.5711	23.4588	54.6725	47.8589	58.5354	56.8668	43.6486	41.4216	9.04849	47.164	52.9683	48.7907
gene12537	GRIK2	2.69949	1.55118	2.45737	2.22486	3.2112	3.09698	4.12706	3.20704	3.4125	2.13875	4.51513	6.07619	6.64312
gene12540	LOC105615865	0.0369857	0.146968	0	0.448665	0.0550212	0.280521	0.0753933	0.150904	0.20848	0	0.184231	0.122874	0.160065
gene12541	ASCC3	15.1463	22.9436	20.6885	35.8601	36.9167	47.8419	42.6197	31.919	39.8989	8.13971	24.0699	37.301	30.9166
gene12544	SIM1	0	0	0	0	0	0	0.111435	0.0223043	0.0513572	0.108328	0.0605115	0.0778345	0.289158
gene12547	MCHR2	0	0	0	0	0	0.130708	0.0526939	0	0	0	0.100149	0.0858794	0
gene12548	PRDM13	0	0.0779659	0.0368046	0	0	0	0	0	0	0	0	0	0
gene12549	CCNC	30.1254	39.8297	39.3445	62.0878	72.0455	74.5291	84.218	57.6311	57.9625	18.8617	52.9083	88.445	79.1764
gene1255	LOC101121654	13.2249	5.68613	9.00504	8.26498	13.0558	10.6532	14.8199	21.9506	12.2942	1.54358	15.4053	11.8302	13.4845
gene12550	TSTD3	7.15795	5.16056	4.81553	11.8706	6.84901	5.00685	6.98551	6.46019	4.50082	7.03603	5.60397	7.48239	6.86219
gene12551	USP45	1.88408	4.96709	3.87396	9.91568	7.51909	11.2082	9.74917	5.78753	5.28453	0.417327	3.88028	7.45441	11.1854
gene12552	PNISR	97.7118	99.0293	49.3672	191.561	212.489	258.138	194.112	218.613	202.386	28.301	243.106	161.919	278.045
gene12553	COQ3	15.8128	21.1495	14.8147	30.779	23.7057	33.9319	23.5565	31.397	24.6786	16.2862	39.4686	21.451	38.9354
gene12554	FAXC	3.15823	4.8958	3.65662	6.38479	7.20986	7.17999	5.48501	7.99487	6.69814	1.0206	8.7538	6.5333	7.68772
gene12555	FBXL4	3.99115	7.55741	5.98692	10.706	8.5402	9.91782	10.7221	10.0228	8.21201	2.25571	9.95581	7.8703	9.3662
gene12559	MMS22L	5.83481	12.6058	7.17809	19.1551	17.0077	25.5963	20.3778	18.095	19.9741	2.74639	15.5772	17.6947	15.9947
gene12560	KLHL32	10.5999	11.2155	11.5123	15.945	16.6431	19.1944	15.8487	17.087	15.2451	7.96185	18.9988	12.9594	17.4071
gene12562	NDUFAF4	6.46191	7.29509	6.68286	13.7725	12.4725	18.6117	14.5776	11.4471	13.6399	7.03059	14.8942	10.9862	19.7057
gene12563	GPR63	5.23047	9.09116	5.46451	11.0193	13.6537	18.3409	9.57267	7.4287	11.8803	2.73879	8.17156	8.02849	11.1748
gene12564	FHL5	0.36266	0.78779	0.761908	0.601831	1.16533	0.636572	0.823749	1.6158	2.92325	1.21272	1.92689	1.71431	2.51121
gene12565	UFL1	17.5173	22.6491	22.8787	27.2194	31.6795	33.9646	40.5365	30.0816	32.7445	3.77884	32.745	37.74	35.3908
gene12568	FUT9	0	0	0	0.00632592	0.00484854	0.0141256	0.0417608	0.0106383	0.0244954	0.0226049	0	0.0433114	0.0188069
gene12569	LOC101106531	0	0	0	0	0.653652	0	0.639766	0	0.619186	0.979539	0.243185	1.25121	1.90158
gene12574	MANEA	5.24048	8.11539	10.8408	11.7844	15.6791	13.9975	16.9005	8.23346	11.5365	1.91805	13.8743	15.9994	16.7182
gene12579	EPHA7	2.00737	3.3728	2.97514	4.49139	5.2259	7.12918	8.03767	5.93788	6.67904	0.455792	8.11646	12.7291	5.01402
gene1258	LOC105615728	0.225533	0.099576	0.188023	0	0	0	0	13.6188	2.22473	0	14.854	39.176	0.4338
gene12584	LOC101107795	0.0266582	0	0.0666738	0.0388062	0.118973	0.0866534	0.0232891	0	0.0375666	0	0	0	0
gene12586	MAP3K7	17.9842	32.575	31.2321	45.5554	34.9162	41.3687	39.6694	37.999	33.8961	11.4368	40.8562	34.0976	46.6456
gene12590	BACH2	5.59683	7.82326	4.67646	15.3264	11.0609	19.1263	13.6782	11.1207	7.56871	0.463151	13.1198	12.8883	9.72128
gene12591	GJA10	0.0665585	0.205706	0.14797	0.290666	0.470319	0.560908	0.34242	0.126729	0.291803	0	0.343817	0.484361	0.586767
gene12592	CASP8AP2	8.22549	11.7662	9.69545	19.0799	23.6876	25.7035	25.782	17.075	17.9091	1.8172	17.3794	17.4617	17.986
gene12593	MDN1	3.09451	6.83894	3.92984	6.50228	4.01147	6.78021	3.99519	6.99597	5.49688	2.02421	7.04633	3.97613	6.82482
gene12594	LYRM2	15.7779	13.1689	12.7033	27.3725	27.4908	31.6735	39.3217	22.4209	15.6857	11.8852	19.5583	41.0056	28.2953
gene12595	ANKRD6	5.09508	9.7027	8.14015	19.1888	16.6293	19.3515	13.2426	22.8596	18.8058	1.17223	22.3687	24.6546	19.2515
gene12597	LOC101110340	0	0	0	0	0	0	0	0	0	0	0	0	0
gene12599	RRAGD	1.34177	1.35583	2.56012	2.27538	2.17612	1.97839	1.7885	2.91221	4.01554	0.380327	3.46809	2.22554	3.23268
gene126	C1H1orf94	0	0.030776	0	0.10147	0	0.0503511	0.060896	0.0853207	0.0982285	0	0	0.0661647	0.100556
gene1260	PRD-SPRRII	0	0	0	0	0	0	0	0	0	0	0	0	0
gene12600	UBE2J1	10.1188	16.2369	17.6855	18.4029	15.5983	17.4016	15.1627	16.674	19.557	8.52651	20.6651	16.3006	25.1116
gene12601	GABRR2	0.364373	0.683723	0.0379715	0.0663018	0.186331	0.197401	0.145898	0.557498	0.449287	0	0.352915	0.302631	0.722753
gene12602	GABRR1	0.321856	0.596838	0.482988	0.187409	1.4005	0.209241	0.281179	0.118187	0.634981	0.0956691	0.213762	0.0916521	0.139292
gene12603	PM20D2	1.39621	3.84432	4.78433	5.52125	3.52036	5.24124	3.58244	3.78131	4.19844	1.57672	4.01586	3.94457	2.7437
gene12604	SRSF12	2.13237	5.52865	3.91478	7.06671	7.18803	8.79934	8.71984	3.88732	4.73115	0.809143	4.6705	5.29698	10.6683
gene12605	PNRC1	83.1098	86.1123	89.7122	60.1432	72.8792	43.6563	78.5424	53.8731	48.8873	10.0987	75.6302	64.2708	53.6908
gene12607	RNGTT	10.1139	14.7813	9.95933	23.5848	24.9455	29.9745	29.6401	27.8571	28.3948	4.29157	27.8422	30.1779	33.2684
gene12608	CNR1	0.196604	0.0868036	0.177565	0.206696	0.207169	0.13018	0.162215	0.267385	0.184702	0	0.19949	0.295477	0.582993
gene12609	SPACA1	0	0.173394	0	0	0	0	0.114364	0.160234	0.184475	0.0486393	0.108679	0	0.0944234
gene12612	AKIRIN2	105.067	152.638	105.57	143.026	154.788	156.601	134.617	143.668	143.76	45.8025	174.958	122.37	169.909
gene12613	ORC3	8.28185	13.3751	10.435	22.2657	19.6683	24.1385	18.4641	21.3857	15.8404	9.51645	19.0799	17.9217	20.1229
gene12614	RARS2	8.48157	14.7438	11.3557	25.4878	20.902	27.2378	21.3682	26.1577	19.4387	5.86734	21.7098	19.7161	22.3579
gene12615	SLC35A1	30.372	43.2567	30.6198	65.9994	65.3981	81.5246	64.2823	72.7804	67.5976	11.6571	82.9221	73.4254	79.0463
gene12616	CFAP206	0.389531	0.963108	0.584543	0.982864	0.782296	1.40687	0.907469	1.62109	0.805088	0.733303	1.85407	1.33108	2.73473
gene12617	C8H6orf163	0	0.0899607	0.0849336	0.296604	0	0.183975	0.296673	0.249399	0.0957098	0	0.11277	0.0967022	0.342922
gene12618	SMIM8	11.3176	14.6613	10.9647	20.458	18.1085	24.7277	20.1549	16.2887	15.5982	20.9792	25.7094	9.20806	14.8016
gene12619	GJB7	0.0983143	0.0558093	0.0702542	0.102225	0.235054	0.380445	0.282207	0.29225	0.217712	0.0313105	0.606317	0.299958	0.42548
gene1262	LELP1	0.332872	0.293936	0.555021	0.323039	0.123798	0	0.290803	0.271627	0	0	0	0	0.480196
gene12620	ZNF292	11.2156	14.9334	10.6164	23.8782	31.3396	31.5551	32.2482	25.9461	27.4621	2.34882	26.7383	28.2655	30.3673
gene12621	LOC101114528	0	0	0	0	0	0	0	0	0	0.469604	0	0	0.30388
gene12622	LOC106990113	0	0	0	0	0	0	0	0	0	0	0	0	0
gene12623	CGA	0	0.117784	0	0.258893	0	0	0.0776859	0.326535	0.626557	0.3304	0.442945	0	0.256562
gene12624	HTR1E	0.0109764	0.0581548	0.0686313	0.239673	0.269425	0.130823	0.278085	0.295576	0.556842	0.138662	0.309824	0.234423	0.348356
gene12627	SYNCRIP	54.5138	82.6444	77.885	98.0414	86.0578	101.168	101.838	83.5428	86.446	37.8007	76.3913	78.791	95.7313
gene12628	SNX14	25.1305	37.9101	37.8005	53.2208	46.1855	58.5753	54.0967	48.3617	43.119	15.8051	50.6254	48.6902	78.2322
gene12629	NT5E	5.94639	17.2637	12.408	18.4194	11.6876	15.9951	14.7239	11.9545	7.23473	5.69048	12.5138	8.88491	12.8423
gene1263	PRR9	4530.2	4331.2	4568.9	8746.3	4302.25	8213.8	5676.01	5367.72	3565.76	7227.81	3130.16	2186.12	3273.33
gene12634	TBX18	4.56411	8.39309	4.97333	8.04691	14.0285	8.79825	6.12611	4.62383	8.78897	0.996081	6.58491	8.43847	8.82145
gene12635	CEP162	15.8947	19.4067	15.7497	30.0533	26.9975	38.2607	41.9552	26.7195	32.1382	2.93637	35.9748	27.7725	30.6581
gene12636	MRAP2	0.188342	0.0415779	0.157018	0.319862	0.525344	0.170059	0.0548463	0.422645	0.17694	0	0.364839	0.402243	0.13585
gene12637	LOC101117851	10.8939	17.0806	11.2275	33.7559	32.6357	40.43	31.3991	36.1883	37.4726	4.78071	34.7044	45.1076	48.095
gene12638	RIPPLY2	0.475894	0.126069	0.238048	0.138551	0.106193	0.412509	0	0.466003	0.536502	0	0.4741	0	0.137304
gene12639	LOC101116409	79.709	47.4149	33.7828	36.2599	177.294	93.0989	89.6015	181.552	967.214	23.9295	424.16	299.081	146.105
gene1264	LOC101121908	3.31445	4.32589	4.04372	2.02407	1.13646	1.47153	1.32772	4.94749	1.86828	0.456553	4.59052	1.68047	1.91255
gene12640	LOC101116661	7.4007	13.4953	1.20439	18.8161	11.5374	21.9142	8.85669	5.33588	19.0722	3.91745	34.9282	15.9501	4.97245
gene12641	THEMIS	0.0850717	0.112681	0.0106385	0.284828	0.85425	0.506968	0.497945	0.437343	0.431577	0.0568955	0.480255	1.21126	0.454076
gene12642	PTPRK	21.764	33.1576	25.2298	63.4524	71.7004	75.9862	68.9627	55.7848	62.258	6.15284	68.8574	97.3714	76.6033
gene12648	LAMA2	11.9117	26.9513	13.3982	33.6089	42.5215	38.7336	28.6259	33.7814	40.6899	3.17306	35.1357	37.9329	39.8136
gene1265	PGLYRP4	5.00526	4.56056	4.60472	5.38338	3.00567	6.61499	2.68767	12.6823	3.84117	1.05423	9.9516	8.57906	4.23113
gene12650	ARHGAP18	14.918	19.5008	21.6313	36.4259	32.4168	35.1562	23.4897	38.0848	38.5158	15.797	42.4915	36.1338	65.3043
gene12652	TMEM244	1.07534	3.13355	1.19106	12.031	7.71291	9.32116	10.2801	2.82051	3.46369	0.684936	5.76455	6.86798	4.47653
gene12654	L3MBTL3	5.4902	8.58884	7.64499	10.6921	10.3803	9.79122	8.65933	10.6613	11.1033	2.76764	11.1361	10.5423	16.2469
gene12655	SAMD3	0.149393	0.296816	0.217957	0.28996	0.722285	0.539562	0.369785	0.487625	0.596483	0.481062	0.413415	0.567216	0.359186
gene12656	TMEM200A	0.584845	1.16198	1.14581	1.05	1.04404	1.26737	0.681241	2.64868	5.93395	1.88327	3.33399	2.05401	7.08699
gene12658	SMLR1	0	0	0	0.0561764	0.172227	0.292695	0.0674273	0.11809	0.0543819	0	0.128151	0.247256	0.194847
gene12659	EPB41L2	13.1939	29.6926	22.5853	32.0505	38.5785	32.2213	24.5584	34.8135	40.7214	13.3287	46.5836	28.6396	62.788
gene12663	AKAP7	10.0906	16.4898	12.6732	18.9491	23.6863	32.6104	26.2169	21.1197	29.4856	4.38215	34.0161	26.3084	40.2667
gene12666	ARG1	3.22523	1.28159	3.16898	7.37777	6.73428	8.58666	2.37485	6.20359	3.83076	0.376622	24.4805	8.9874	27.5172
gene12667	MED23	10.0703	16.8783	17.6672	20.5183	16.6354	18.9447	20.9406	16.6943	14.5584	4.64982	17.4781	16.5655	21.7675
gene12668	ENPP3	23.043	8.12549	18.9449	26.3099	25.6852	34.7113	30.7533	35.8215	10.163	0.490173	49.5412	31.807	47.9909
gene12669	ENPP1	12.4454	21.4615	19.765	31.3135	25.5975	27.2926	21.7104	31.6836	28.1	21.5989	34.5943	19.7013	62.1206
gene1267	S100A9	24.3917	16.6751	11.4795	7.89041	4.7796	5.87304	4.12433	18.8338	8.74716	14.2926	20.7578	124.477	5.17087
gene12670	CTGF	133.369	202.469	251.148	159.838	154.29	129.108	145.014	144.969	185.915	113.278	160.905	104.082	171.807
gene12673	MOXD1	12.1036	19.29	25.5683	24.1841	24.1048	22.926	25.368	23.5862	12.6855	9.94796	33.1786	23.6797	18.7976
gene12674	LOC105615893	0	0.0152514	0.0575965	0.0670458	0.0513877	0.024952	0.0201184	0.0140939	0.146034	0.0770078	0.0764733	0.0819715	0.215937
gene12675	STX7	52.558	63.3266	65.5181	97.2025	92.8573	94.9318	88.2863	104.235	83.2835	31.5279	129.066	95.1518	125.516
gene12676	TAAR9	0	0	0	0	0	0	0	0	0	0	0	0	0
gene12677	LOC101102244	0	0	0	0	0	0	0	0	0	0	0	0	0
gene12678	LOC101118451	0	0	0	0	0	0.0653539	0	0	0	0	0	0	0
gene12679	LOC101102492	0	0.0796608	0	0	0	0	0	0	0	0	0	0	0
gene1268	LOC101103771	22.0343	15.1764	7.71528	35.4431	21.1425	20.0545	15.0147	89.4069	45.3339	14.7364	110.122	1281.88	13.0324
gene12680	LOC101118705	0	0	0	0	0.13292	0.0645409	0.0520384	0	0.0839407	0	0	0	0
gene12682	LOC101118960	0	0	0	0	0	0.0647889	0	0	0	0	0	0	0.17252
gene12683	LOC101102987	0	0	0	0	0	0	0	0	0	0	0	0	0
gene12684	LOC101103241	0.501183	0	0	0	0.33551	0.108607	0	0	0	0	0	0	0
gene12685	LOC101119225	0.0599682	0	0	0	0.200724	0	0	0	0.0845068	0	0.0995701	0	0
gene12686	LOC101103482	0	0	0	0	0	0	0	0	0	0	0	0	0
gene12687	LOC101103730	0	0	0	0.0841341	0	0	0.0504922	0	0	0	0.383858	0	0
gene12689	TAAR5	0	0	0	0	0	0	0	0	0	0	0	0	0
gene1269	S100A8	23.8393	28.7056	17.4654	12.7944	9.40336	13.3064	11.5702	141.477	62.6073	15.8362	149.333	1926.66	8.68439
[truncated: 18,682 more rows]
