# Supplementary material for: Transcriptome Analysis Reveals Candidate Genes Regulating the Skin and Hair Diversity of Xinji Fine-Wool Sheep and Tan Sheep
Source: MDPI journal article supplement (doi:10.3390/agriculture12010015), 2021-12-23
Supplement: s1 [file s1 › Supplementary Table S6.xlsx]

## Sheet: Sheet1
Table S6 | Differentially expressed mRNAs between 12-m-XFWS and 12-m-TS.
Row.names	baseMean	log2FoldChange	lfcSE	stat	pvalue	padj	X1	X2	X3	C1	C2	C3	C4	C5	C6	name
gene10004	865.85	1.04889	0.32186	3.25882	0.00111875	0.00880366	940.774	1436.41	1585.43	514.632	712.728	377.761	758.546	633.371	833.005	SYNPO
gene1003	1508.78	1.05606	0.233423	4.52423	6.06e-06	0.000131916	1661.83	2476.6	2783.05	1096.04	1238.92	1249.35	1052.31	948.254	1072.66	PTGFRN
gene10043	1661.28	1.34318	0.289051	4.64687	3.37e-06	7.99e-05	2359.92	2947.98	3053.34	1192.94	1320.86	606.607	1102.61	1091.27	1275.95	LARP1
gene10048	1620.61	-1.14725	0.221382	-5.18221	2.19e-07	8.05e-06	986.714	958.533	740.365	1870.43	2188.86	1670.91	1860.15	2502.24	1807.32	MRPL22
gene10051	978.722	-2.03794	0.608084	-3.35141	0.000804003	0.00676979	418.455	359.102	178.414	1450.25	1380.17	147.819	1523.13	2047.94	1303.22	SGCD
gene10054	42.828	-1.78504	0.44301	-4.02935	5.59e-05	0.00082427	18.9753	14.8466	14.9569	35.8288	53.9128	29.5639	78.4703	76.918	61.9795	LOC105611754
gene10066	2087.2	1.08861	0.230508	4.72267	2.33e-06	5.86e-05	3180.85	2548.05	3952.89	1912.77	1564.55	1321.62	1369.21	1421.78	1513.13	CYFIP2
gene10076	5846.67	-2.47019	0.528024	-4.67818	2.89e-06	7.03e-05	1265.35	2245.55	843.994	7771.59	10804.1	1665.43	8779.61	9349.14	9895.24	EBF1
gene10115	81.4388	-2.1078	0.487872	-4.3204	1.56e-05	0.000292674	34.9544	32.4769	8.54678	73.2861	122.921	63.5076	133.802	97.3493	166.105	LOC106990422
gene10195	8767.85	-1.55331	0.413782	-3.75393	0.000174085	0.0020048	5066.4	3166.96	3253.12	11861.8	9310.75	20435.2	6768.56	12751.6	6296.29	FAM172A
gene10201	1634.91	-1.82983	0.540763	-3.38379	0.000714923	0.00615097	679.115	759.032	376.058	1513.77	2567.33	409.515	3201.18	2648.86	2559.34	MCTP1
gene10209	248.352	-1.13967	0.326922	-3.48605	0.000490208	0.004623	121.841	149.394	142.09	266.273	212.417	216.802	284.706	461.508	380.141	ARSK
gene10214	460.066	-1.18076	0.366183	-3.2245	0.00126193	0.00962603	207.729	377.66	162.389	492.646	648.032	319.728	595.569	731.922	604.92	SPATA9
gene10219	33.9072	-2.18245	0.567139	-3.84818	0.000119	0.00149358	11.9844	5.56747	12.8202	46.4146	73.3214	24.0891	19.1146	69.7069	42.1461	LOC105607634
gene10313	770.124	-1.56484	0.392965	-3.98214	6.83e-05	0.000964074	284.629	370.237	347.213	815.919	1345.66	390.9	938.625	1050.41	1387.51	PDE5A
gene10341	25.885	-2.98714	0.639014	-4.67461	2.95e-06	7.12e-05	1.9974	7.4233	4.27339	52.1146	19.4086	42.7034	29.1748	57.6885	18.1807	NDST4
gene10351	2406.31	-1.3776	0.39386	-3.4977	0.000469291	0.00446606	991.707	1624.77	878.182	2643.19	4506.03	1397.17	2596.56	3110.37	3908.84	ANK2
gene10373	10.1146	-4.47629	1.12302	-3.98595	6.72e-05	0.000954054	0	0.927912	1.06835	10.5858	14.0173	18.6143	10.0603	19.2295	16.5279	EGF
gene10377	174.649	-2.30626	0.457595	-5.03995	4.66e-07	1.52e-05	57.9245	36.1886	50.2123	283.373	169.286	140.155	263.58	444.682	126.438	CFI
gene10385	349.692	-1.84221	0.461091	-3.99532	6.46e-05	0.000921501	194.746	98.3587	91.8779	398.188	575.789	459.883	230.381	824.464	273.536	COL25A1
gene10390	546.078	-1.76992	0.294947	-6.00081	1.96e-09	1.49e-07	244.681	263.527	119.655	683.19	671.754	875.967	747.48	688.656	619.795	RPL34
gene10407	307430	3.17948	0.285315	11.1438	7.68e-29	3.41e-25	600465	770617	895435	84749.7	97993	113681	63712.8	80611.2	59600.3	GSTCD
gene10409	100.298	-1.54543	0.47988	-3.22044	0.00127992	0.00972151	29.9609	61.2422	40.5972	97.7149	215.651	47.0832	142.856	163.451	104.126	ARHGEF38
gene10419	934.686	-1.18215	0.23444	-5.04245	4.6e-07	1.5e-05	577.248	506.64	434.817	1220.62	1360.76	1016.12	843.052	1296.79	1156.12	BDH2
gene10422	398.273	-2.36253	0.674229	-3.50405	0.000458233	0.00439142	140.816	116.917	59.8275	563.489	512.172	36.1336	611.666	745.143	798.296	SLC9B1
gene10426	486.598	-1.49036	0.358749	-4.15432	3.26e-05	0.000533493	165.784	244.969	251.062	949.463	659.893	316.443	510.057	632.169	649.545	MANBA
gene10432	227.212	-1.30836	0.338873	-3.86091	0.000112964	0.0014298	84.8893	127.124	131.407	277.673	263.095	159.864	303.821	421.847	275.189	BANK1
gene10438	1114.28	-1.76255	0.289853	-6.08084	1.2e-09	1.01e-07	370.517	430.551	487.166	1314.26	1902.04	929.62	1399.39	1310.01	1885	EMCN
gene10467	5.49677	-4.4969	1.30955	-3.43393	0.00059489	0.00536942	0.998698	0	0	7.32861	11.8608	6.56975	6.03617	8.4129	8.26394	LOC101102064
gene10468	15.5718	-4.51956	1.16477	-3.88022	0.000104363	0.00135079	2.99609	0	0	43.9717	5.39128	24.0891	5.03014	39.6608	19.0071	LOC106990267
gene10471	199.194	-2.16084	0.551983	-3.91469	9.05e-05	0.0012059	62.918	79.8004	37.3922	245.916	597.354	104.021	120.723	301.663	242.96	UNC5C
gene10486	292.117	-2.36698	0.441793	-5.35765	8.43e-08	3.57e-06	84.8893	63.098	84.3994	277.673	423.755	170.814	294.766	618.949	610.705	GRID2
gene10489	1508.06	-2.23472	0.54226	-4.12112	3.77e-05	0.000597813	528.311	527.054	247.857	1872.05	2486.46	375.571	1992.94	3075.52	2466.78	CCSER1
gene10494	993.997	-2.81723	0.415884	-6.77408	1.25e-11	1.85e-09	154.798	154.961	283.112	701.918	1571.02	1688.43	1395.36	846.097	2150.28	MMRN1
gene10495	148.935	-1.13594	0.275251	-4.12691	3.68e-05	0.000588427	85.888	90.0075	72.6476	164.487	199.477	151.104	170.019	151.432	255.356	SNCA
gene10530	700.421	-1.92491	0.554771	-3.46974	0.000520962	0.00486651	273.643	329.409	130.338	784.976	673.91	247.461	1780.67	709.087	1374.29	KCNIP4
gene1057	1635.86	1.48575	0.339586	4.37517	1.21e-05	0.000237306	3263.75	2441.34	2884.54	1438.85	825.945	947.139	1511.06	725.913	684.254	ANKRD35
gene10586	25.1615	-1.96821	0.479071	-4.10839	3.98e-05	0.000626685	6.99089	12.0629	6.41008	21.9858	28.0347	25.1841	47.2834	39.6608	38.8405	C6H4orf19
gene10608	78.9255	-1.27086	0.358873	-3.54124	0.000398246	0.00393329	42.944	36.1886	42.7339	50.486	95.9648	136.87	102.615	90.1382	112.39	KLB
gene10632	32.6477	1.83273	0.447049	4.09962	4.14e-05	0.000644625	58.9232	75.1609	53.4174	12.2144	21.5651	31.7538	18.1085	14.4221	8.26394	SHISA3
gene10658	292.729	-1.59116	0.405469	-3.92424	8.7e-05	0.0011696	113.852	140.115	120.723	271.973	254.469	342.722	303.821	770.381	316.509	CORIN
gene10712	13.7077	-2.8835	0.733477	-3.93128	8.45e-05	0.0011419	2.99609	4.63956	0	11.4001	14.0173	13.1395	29.1748	24.0369	23.9654	PPAT
gene10715	19.9381	-2.258	0.672741	-3.35642	0.000789593	0.00666994	9.98698	2.78374	4.27339	12.2144	38.8172	18.6143	40.2412	12.0184	40.4933	ARL9
gene10739	7.91189	-4.10111	1.20051	-3.41613	0.000635179	0.00565106	0	0.927912	1.06835	7.32861	11.8608	10.9496	8.04823	25.2387	5.78475	TECRL
gene10742	55.624	-1.90211	0.488942	-3.89026	0.000100138	0.00130466	21.9714	24.1257	12.8202	58.6289	38.8172	38.3236	88.5305	116.579	100.82	EPHA5
gene10752	64.2676	-1.63754	0.409456	-3.99931	6.35e-05	0.000910506	27.9635	13.9187	38.4605	79.8005	93.8083	60.2227	116.699	91.3401	56.1948	TMPRSS11D
gene10753	11.6939	-2.62312	0.686878	-3.81891	0.000134045	0.00164163	1.9974	3.71165	2.13669	15.4715	15.0956	7.66471	22.1326	18.0276	19.0071	TMPRSS11A
gene10756	25.1604	-2.83096	0.817924	-3.46116	0.00053786	0.00497465	2.99609	6.49538	5.34174	55.3718	84.104	18.6143	14.0844	33.6516	5.78475	LOC101115964
gene10774	8.54453	-3.60987	1.05545	-3.42024	0.000625667	0.00558602	1.9974	0	1.06835	12.2144	14.0173	21.8992	3.01809	14.4221	8.26394	LOC101122788
gene10793	9.79989	-3.84716	1.04635	-3.67675	0.000236227	0.00258626	1.9974	0.927912	0	13.8429	15.0956	3.28488	26.1568	12.0184	14.8751	LOC105615578
gene10797	26.9215	-4.03488	0.940703	-4.28921	1.79e-05	0.000328543	0	0.927912	6.41008	83.8719	51.7563	8.75967	45.2713	31.2479	14.0487	AMTN
gene10807	1127.82	-1.67091	0.461722	-3.61885	0.000295912	0.00310035	310.595	544.684	522.422	1249.94	1926.84	587.993	1132.79	1138.15	2737.02	SLC4A4
gene10834	550.212	-3.49699	0.478947	-7.30141	2.85e-13	7.22e-11	76.8998	74.233	58.7591	285.002	808.692	508.061	649.895	1498.7	991.672	LOC101104661
gene10855	78.0729	-1.54355	0.374156	-4.12542	3.7e-05	0.000589879	27.9635	32.4769	42.7339	117.258	117.53	84.3118	57.3437	81.7253	141.313	ART3
gene10873	5953.05	1.00883	0.286447	3.52187	0.000428517	0.00414466	9928.06	6823.86	10119.4	4782.33	4868.33	2601.62	5156.9	4327.84	4969.1	CCNI
gene10893	294.857	-2.22995	0.661882	-3.36911	0.000754125	0.006435	123.839	97.4308	34.1871	451.117	918.675	82.1219	243.459	498.765	204.119	C6H4orf22
gene10904	183.461	-1.48591	0.373862	-3.97449	7.05e-05	0.000988939	97.8724	96.5028	55.5541	228.001	228.59	107.306	290.742	278.828	267.751	LOC105609538
gene10946	86.3021	2.91992	0.902253	3.23625	0.00121109	0.00931928	242.684	83.5121	288.454	57.0003	4.31303	6.56975	76.4582	14.4221	3.30557	HSD17B13
gene10947	493.248	-1.01076	0.261783	-3.86105	0.000112901	0.0014298	259.662	319.202	303.411	417.731	694.397	485.067	749.492	644.188	566.08	HSD17B11
gene10969	35.3279	-1.80154	0.463052	-3.89059	0.000100001	0.00130383	12.9831	13.9187	12.8202	42.3431	30.1912	38.3236	41.2472	88.9364	37.1877	STK32B
gene10972	1263.13	2.24575	0.486761	4.61366	3.96e-06	9.19e-05	3036.04	2206.57	2753.13	381.088	596.276	1315.05	272.634	394.205	413.197	MSX1
gene10982	42.34	-3.1404	0.580028	-5.41422	6.16e-08	2.74e-06	3.99479	12.9908	3.20504	61.0718	98.1213	40.5135	29.1748	60.0922	71.8962	SLC2A9
gene10988	43.3526	-2.01999	0.500402	-4.03674	5.42e-05	0.000804728	12.9831	14.8466	14.9569	58.6289	31.2694	28.4689	86.5185	93.7438	48.7572	CLNK
gene11001	1686.44	-2.38316	0.517294	-4.60698	4.09e-06	9.42e-05	431.438	560.459	335.461	2337.83	2832.58	498.206	3855.1	2621.22	1705.68	C1QTNF7
gene11014	2915.51	-2.75435	0.588767	-4.67816	2.89e-06	7.03e-05	566.262	915.849	327.983	4452.54	6745.57	649.311	4162.95	3044.27	5374.86	LDB2
gene11025	1370.38	2.00183	0.338315	5.91704	3.28e-09	2.35e-07	2252.06	2622.28	3351.41	630.261	959.648	365.716	900.396	641.784	609.878	LOC101108390
gene11026	104.978	1.60524	0.298228	5.38261	7.34e-08	3.18e-06	162.788	180.943	226.49	65.1432	70.0867	35.0387	71.4281	70.9087	61.9795	BLOC1S4
gene11058	245.16	1.68018	0.320943	5.23513	1.65e-07	6.35e-06	406.47	467.668	485.03	126.215	149.878	83.2169	204.224	109.368	174.369	MFSD10
gene11074	1846.39	1.53273	0.309098	4.95872	7.1e-07	2.17e-05	3328.66	3430.49	3066.16	1229.58	921.909	1845.01	1082.49	904.988	808.213	FGFR3
gene11078	127.203	2.96466	0.297868	9.95293	2.45e-23	4.83e-20	284.629	302.499	323.709	36.6431	47.4433	54.7479	40.2412	27.6424	27.271	LOC106990166
gene11081	513.149	1.05605	0.190684	5.53823	3.06e-08	1.5e-06	810.943	767.383	775.62	344.445	406.503	386.52	452.713	319.69	354.523	CTBP1
gene11090	195.489	1.33738	0.378804	3.53053	0.000414729	0.00404657	292.619	496.433	193.371	129.472	94.8866	125.92	172.031	87.7345	166.931	TMEM175
gene11091	1677.04	1.30147	0.27953	4.65595	3.22e-06	7.68e-05	2968.13	2913.64	2450.79	1156.29	986.605	1617.25	1181.08	727.115	1092.49	GAK
gene11142	377.619	-1.32915	0.365563	-3.63591	0.000277002	0.00293039	164.785	176.303	223.285	535.803	458.259	432.509	710.256	213.928	483.44	LVRN
gene11143	165.623	-2.81068	0.515923	-5.44787	5.1e-08	2.35e-06	20.9727	56.6026	21.3669	285.002	239.373	120.445	412.472	115.377	218.994	ARL14EPL
gene11159	621.774	-1.83154	0.567205	-3.22907	0.00124195	0.00951087	260.66	274.662	153.842	429.131	717.041	166.434	1205.22	1319.62	1069.35	ANKRD31
gene11170	1059.12	1.39408	0.31862	4.37538	1.21e-05	0.000237306	1456.1	1712	2244.6	521.96	803.301	397.47	827.962	849.703	718.962	F2R
gene11172	1063.37	1.14983	0.237363	4.84417	1.27e-06	3.51e-05	1413.16	1445.69	2174.09	700.29	796.832	897.866	678.064	817.253	647.066	F2RL1
gene11179	1094.1	-1.70258	0.482068	-3.53182	0.000412714	0.00403578	331.568	671.808	307.684	1687.21	1636.79	367.906	1710.25	1566	1567.67	PDE8B
gene11215	11.5947	-2.83432	0.846097	-3.34987	0.000808491	0.00679916	0	4.63956	2.13669	26.8716	11.8608	4.37984	23.1387	15.624	15.7015	ANKDD1A
gene11217	847.328	-1.05504	0.205795	-5.12665	2.95e-07	1.03e-05	513.331	560.459	404.904	988.549	910.049	1200.07	901.402	1058.82	1088.36	MTFMT
gene11219	582.823	1.1466	0.300851	3.81117	0.00013831	0.00168573	1008.69	1108.85	638.872	523.589	491.685	297.829	408.448	311.277	456.169	RASL12
gene11221	20.9394	-3.206	0.750309	-4.2729	1.93e-05	0.000347848	2.99609	6.49538	0	34.2002	24.7999	7.66471	38.2291	36.0553	38.0141	UBAP1L
gene11232	223.999	-1.83758	0.374388	-4.90823	9.19e-07	2.7e-05	87.8854	105.782	53.4174	304.545	299.755	150.009	290.742	436.269	287.585	SLC24A1
gene11254	1939.74	-1.23827	0.316594	-3.91124	9.18e-05	0.00121866	1070.6	1205.36	776.689	2659.47	2546.84	1294.24	2561.35	3141.62	2201.51	MAP2K5
gene11293	451.05	-1.15059	0.30541	-3.76737	0.00016498	0.001927	295.615	200.429	249.993	499.16	463.65	787.275	446.677	704.28	412.37	SENP8
gene113	763.7	-1.43111	0.379843	-3.76763	0.000164806	0.00192696	251.672	511.279	311.957	858.262	1001.7	445.648	1096.57	1181.41	1214.8	INPP5D
gene11309	87.5124	-1.24407	0.368969	-3.37174	0.000746954	0.00638326	59.9219	47.3235	29.9137	108.301	100.278	73.3622	78.4703	145.423	144.619	REC114
gene11317	790.484	1.42128	0.206603	6.87927	6.02e-12	9.62e-10	1528.01	1170.1	1373.89	450.303	542.363	583.613	547.28	504.774	414.023	KHNYN
gene11319	247.867	1.78543	0.34875	5.11951	3.06e-07	1.06e-05	322.58	537.261	552.336	136.801	169.286	78.837	188.127	100.955	144.619	NYNRIN
gene1133	1076.14	1.13602	0.300944	3.77486	0.000160097	0.00188153	1802.65	1235.98	2033.07	1143.26	660.971	574.853	854.119	688.656	691.691	LOC101122398
gene11345	927.124	1.00523	0.202369	4.96731	6.79e-07	2.11e-05	1398.18	1204.43	1576.88	705.176	618.919	836.549	728.365	681.445	594.177	DCAF11
gene11356	136.808	1.80485	0.266422	6.77438	1.25e-11	1.85e-09	216.718	257.032	309.821	81.4291	89.4953	71.1723	84.5064	51.6793	69.4171	THTPA
gene11368	498.518	1.23642	0.256708	4.81644	1.46e-06	3.94e-05	731.047	826.77	868.566	353.402	327.79	460.978	384.303	290.846	242.96	HOMEZ
gene11371	2149.85	1.0505	0.26985	3.8929	9.91e-05	0.00129339	3277.73	3274.6	3291.58	1705.94	1571.02	2183.35	1068.4	1243.91	1732.12	SLC7A8
gene1138	915.84	1.07405	0.31162	3.44665	0.000567584	0.00517927	1507.04	1216.49	1503.16	580.589	662.05	1107	652.913	495.159	518.149	SF3B4
gene11381	1446.34	1.86856	0.433885	4.30657	1.66e-05	0.000307343	2889.23	2960.04	2561.9	1211.66	607.058	254.03	1054.32	789.611	689.212	AJUBA
gene11387	2951.19	1.55942	0.28407	5.48956	4.03e-08	1.9e-06	6000.18	3984.45	5838.52	1793.88	1772.65	2523.88	1910.45	1443.41	1293.31	LRP10
gene11388	1204.02	2.23218	0.357846	6.23783	4.44e-10	4.35e-08	2477.77	2027.49	3096.07	560.232	810.849	327.393	659.955	326.901	549.552	MMP14
gene11435	57.8432	2.28735	0.490934	4.65919	3.17e-06	7.58e-05	128.832	120.629	119.655	31.7573	35.5825	36.1336	28.1688	13.2203	6.61115	SALL2
gene11437	1070.38	1.11848	0.21541	5.19235	2.08e-07	7.67e-06	1763.7	1507.86	1742.47	778.462	714.884	1027.07	713.275	729.519	656.156	TOX4
gene11446	691.377	1.11607	0.265763	4.19949	2.68e-05	0.000451137	1250.37	1036.48	949.761	604.204	470.12	651.5	485.912	350.938	423.113	ZNF219
gene11448	40.1269	-2.12598	0.541214	-3.92818	8.56e-05	0.0011541	7.98959	21.342	7.47843	44.786	81.9475	24.0891	53.3195	80.5235	39.6669	LOC105615652
gene1145	1295.84	1.1336	0.249493	4.54361	5.53e-06	0.000122445	2265.05	1630.34	2205.07	867.219	965.04	746.762	1024.14	1210.26	748.713	APH1A
gene11452	1311.64	1.5896	0.303632	5.2353	1.65e-07	6.35e-06	2494.75	1967.17	2630.27	893.277	758.014	872.682	1108.64	544.435	535.503	NDRG2
gene1146	291.484	-1.5085	0.441178	-3.41926	0.000627908	0.00560092	169.779	99.2866	122.86	216.601	398.955	545.289	197.182	608.133	265.272	C1H1orf54
gene11625	893.839	-1.55352	0.479622	-3.23904	0.00119934	0.00926798	413.461	481.586	275.634	1192.94	1416.83	287.974	1432.59	1608.07	935.477	MEIS2
gene11639	227.024	-1.36857	0.349356	-3.9174	8.95e-05	0.0011969	80.8946	91.8633	159.184	276.044	187.617	241.986	306.839	274.02	424.766	GPR176
gene11651	70.3844	1.22451	0.379494	3.2267	0.00125226	0.00956865	83.8906	130.836	127.133	43.1574	44.2085	26.279	66.3979	39.6608	71.8962	C7H15orf52
gene11657	1043.93	1.24577	0.276465	4.50606	6.6e-06	0.000141077	1663.83	1542.19	1890.97	824.876	601.667	1067.58	611.666	587.701	604.92	BAHD1
gene1166	6588.11	-1.75917	0.37451	-4.69725	2.64e-06	6.51e-05	2061.31	1929.13	3640.93	6377.52	10626.2	5795.62	7570.37	7213.46	14078.4	CTSK
gene11671	334.583	1.72958	0.330826	5.22805	1.71e-07	6.57e-06	708.077	492.721	677.332	187.287	132.626	297.829	217.302	165.854	132.223	RHOV
gene11674	2132.56	2.08247	0.440894	4.7233	2.32e-06	5.85e-05	3547.38	6234.64	3254.19	831.391	649.11	2056.33	1107.64	904.988	607.399	CHAC1
gene11676	29.2403	-1.71444	0.42893	-3.99702	6.41e-05	0.000916414	10.9857	12.0629	11.7518	24.4287	34.5042	29.5639	43.2592	42.0645	54.542	EXD1
gene11687	1530.7	1.36525	0.350811	3.89171	9.95e-05	0.00129879	2907.21	2201.94	2646.3	1236.91	598.432	1507.76	1125.75	918.208	633.844	TYRO3
gene1169	2363.62	1.18247	0.215282	5.49268	3.96e-08	1.87e-06	3806.04	3568.75	3933.66	1908.7	1604.45	1992.83	1761.56	1299.19	1397.43	CERS2
gene1170	1952.38	1.29151	0.292554	4.41462	1.01e-05	0.000202124	3468.48	2677.95	3523.41	1316.71	998.466	1933.7	1367.19	1377.31	908.206	FAM63A
gene11709	1330.45	-1.37661	0.40302	-3.41574	0.00063608	0.00565624	486.366	957.605	489.303	1736.88	1355.37	739.097	2101.59	1859.25	2248.62	STARD9
gene11733	1558.7	-2.11709	0.373223	-5.67245	1.41e-08	7.94e-07	561.268	562.315	325.846	1460.02	3755.57	1598.64	1707.23	2163.32	1894.09	RPS29
gene11742	1457.49	1.41315	0.348822	4.05121	5.1e-05	0.000769405	2321.97	2180.59	2988.17	675.861	1046.99	1620.54	814.883	832.877	635.497	ARF6
gene11827	436.115	-1.70317	0.365472	-4.66019	3.16e-06	7.55e-05	159.792	275.59	86.5361	511.374	662.05	425.939	573.437	676.638	553.684	LIPC
gene11847	814.509	-1.11526	0.307948	-3.62159	0.000292801	0.00307645	588.233	380.444	405.972	1196.19	994.153	631.791	870.215	1365.29	898.29	DYX1C1
gene11857	238.56	-1.75583	0.3887	-4.51719	6.27e-06	0.000135376	105.862	115.061	55.5541	331.416	305.147	278.12	192.152	521.6	242.133	UNC13C
gene11875	176.726	-1.30076	0.335078	-3.88195	0.000103621	0.00134314	98.8711	81.6563	87.6045	115.629	209.182	315.348	215.29	248.782	218.168	LOC105607297
gene11892	275.394	-1.3594	0.404514	-3.36057	0.000777816	0.00659573	127.833	193.934	82.2628	378.645	309.46	156.579	342.05	413.434	474.35	USP50
gene11897	45.9476	-1.78732	0.450807	-3.96471	7.35e-05	0.0010164	19.974	19.4862	12.8202	48.0431	37.739	93.0715	56.3376	38.459	87.5977	HDC
gene11899	837.752	-1.83657	0.489903	-3.74884	0.000177657	0.00204064	221.711	423.128	280.975	1132.68	1781.28	275.93	1114.68	1025.17	1284.22	ATP8B4
gene11905	596.209	-1.20526	0.236407	-5.09823	3.43e-07	1.17e-05	305.602	317.346	333.324	733.676	827.023	500.396	688.124	862.923	797.47	GALK2
gene1192	398.243	1.44528	0.25674	5.62936	1.81e-08	9.7e-07	666.132	707.069	693.357	241.844	256.625	351.482	256.537	170.662	240.481	ZNF687
gene11929	149.587	-2.19956	0.521146	-4.22063	2.44e-05	0.000415984	46.9388	29.6932	55.5541	174.258	112.139	296.734	232.393	334.112	64.4587	C7H15orf48
gene11982	21.4543	-3.99489	0.764606	-5.22477	1.74e-07	6.66e-06	1.9974	3.71165	0	35.0145	26.9564	12.0445	41.2472	32.4498	39.6669	C7H14orf105
gene11994	273.063	1.03542	0.318185	3.25415	0.00113732	0.00889717	350.543	435.191	458.321	204.387	268.486	124.825	278.67	158.643	178.501	DACT1
gene12012	4.27763	-5.10897	1.48649	-3.43694	0.000588333	0.0053277	0	0	0	0.814291	6.46954	9.85463	6.03617	12.0184	3.30557	C7H14orf39
gene12019	1637.53	-1.4852	0.376113	-3.94882	7.85e-05	0.00106955	909.814	793.365	529.9	1977.91	2373.24	939.475	1865.18	3077.92	2270.93	MNAT1
gene12023	429.186	1.46793	0.351664	4.17425	2.99e-05	0.000495724	698.09	636.548	907.027	300.473	262.016	132.49	267.604	414.636	243.786	TMEM30B
gene12027	535.52	-1.13499	0.322468	-3.51971	0.000432018	0.00417398	309.596	296.932	287.385	596.875	597.354	382.141	558.346	807.639	983.408	SNAPC1
gene12028	188.566	1.47924	0.321237	4.60482	4.13e-06	9.5e-05	325.576	311.778	351.486	170.187	92.7301	137.965	142.856	76.918	87.5977	LOC101118878
gene12038	546.158	-1.02491	0.279349	-3.66893	0.00024357	0.00264737	399.479	321.985	247.857	719.019	636.171	801.51	429.574	736.73	623.101	WDR89
gene12050	2474.2	1.74244	0.41567	4.19189	2.77e-05	0.000463182	5281.12	3254.19	5401.56	1747.47	1345.66	2251.24	1141.84	1283.57	561.121	HSPA2
gene12053	305.643	1.35444	0.285848	4.73833	2.15e-06	5.5e-05	485.367	411.065	647.419	175.887	159.582	259.505	244.465	152.634	214.862	SPTB
gene12056	794.443	1.46269	0.319557	4.57726	4.71e-06	0.000106438	2067.31	797.076	1278.81	515.446	502.468	536.53	535.207	531.215	385.926	LOC105615749
gene1206	53.3297	-2.11421	0.398973	-5.29915	1.16e-07	4.75e-06	14.9805	16.7024	18.1619	87.9434	37.739	59.1278	83.5004	70.9087	90.9033	LOC105613572
gene12075	455.02	1.12638	0.338464	3.32792	0.000874969	0.00725721	809.944	581.801	745.707	450.303	201.634	254.03	423.538	389.397	238.828	PLEK2
gene12097	1124.94	1.72248	0.4827	3.56843	0.000359122	0.00362965	1518.02	2083.16	2702.92	749.147	798.988	148.914	871.221	693.463	558.642	ZFP36L1
gene12098	4281.58	1.43852	0.185282	7.76395	8.23e-15	2.98e-12	7336.44	6845.21	7991.24	2582.93	3360.93	2475.7	2875.23	2502.24	2564.3	ACTN1
gene1210	194.647	-1.2244	0.310282	-3.9461	7.94e-05	0.00108007	128.832	105.782	73.716	201.13	256.625	335.057	197.182	269.213	184.286	RIIAD1
gene12114	22.2839	-1.6229	0.501374	-3.23691	0.00120833	0.00931203	3.99479	10.207	13.8885	19.543	35.5825	37.2286	24.1447	20.4313	35.5349	SLC8A3
gene12133	1218.91	-2.97879	0.622062	-4.78858	1.68e-06	4.46e-05	216.718	335.904	101.493	1503.99	3305.93	264.98	1806.83	1266.74	2167.63	RGS6
gene12145	1389.87	1.27611	0.327627	3.89501	9.82e-05	0.00128446	2262.05	2426.49	2163.4	1388.37	560.693	781.801	1255.52	752.354	918.123	PAPLN
gene12177	1195.69	-1.32971	0.344373	-3.86125	0.000112808	0.0014298	865.871	476.019	443.364	1161.99	1442.71	2258.9	1125.75	1722.24	1264.38	FCF1
gene12179	39.5066	-1.73054	0.443338	-3.90344	9.48e-05	0.00125259	17.9766	6.49538	22.4353	55.3718	47.4433	29.5639	60.3617	58.8903	57.0212	PROX2
gene12191	2128.13	-3.11399	0.838717	-3.7128	0.000204979	0.00230235	184.759	318.274	542.72	429.945	3912.99	419.369	4807.81	7662.95	874.324	FOS
gene122	92.3895	-1.78938	0.533138	-3.35631	0.000789891	0.00666994	32.957	54.7468	17.0936	76.5433	207.025	45.9883	174.043	118.982	104.126	CSMD2
gene12201	185.586	1.35287	0.334159	4.04857	5.15e-05	0.000772946	422.449	177.231	337.598	127.844	92.7301	100.736	123.742	133.405	154.536	LOC101110679
gene12206	848.219	-1.44303	0.322691	-4.47188	7.75e-06	0.000161604	428.442	546.54	210.464	1270.29	1024.34	897.866	1184.1	915.804	1156.12	IFT43
gene12216	936.716	2.08236	0.291209	7.15075	8.63e-13	1.87e-10	1762.7	1756.54	2207.21	406.331	608.137	353.672	599.593	317.287	418.982	IRF2BPL
gene12269	666.655	-1.03529	0.294607	-3.51413	0.000441194	0.00425107	334.564	573.45	268.155	743.447	877.701	672.305	712.269	870.134	947.873	SPATA7
gene1227	508.762	-1.97042	0.567537	-3.47187	0.00051684	0.00484074	164.785	193.006	160.252	1024.38	525.111	1310.67	522.129	550.444	128.091	RPTN
gene12278	1058.82	-1.02402	0.301188	-3.39995	0.000673994	0.00588725	860.878	619.845	399.562	1433.15	1251.86	1570.17	1051.3	1348.47	994.151	EFCAB11
gene12317	7336.42	-1.31872	0.352134	-3.74494	0.00018044	0.0020686	3459.49	3865.68	3699.69	7208.1	10165.8	4580.21	8773.58	14591.6	9683.68	SENP6
gene12327	186.376	-1.86852	0.548169	-3.40866	0.000652822	0.00576919	40.9466	115.989	44.8706	208.458	405.424	65.6975	203.218	268.011	324.773	MEI4
gene12351	1007.77	-1.90512	0.491086	-3.8794	0.000104716	0.00135437	404.473	429.623	233.968	1313.45	1848.13	303.304	1452.71	1664.55	1419.74	UBE3D
gene12385	215.319	-3.07204	0.548617	-5.59959	2.15e-08	1.12e-06	25.9662	69.5934	12.8202	198.687	528.346	151.104	262.574	368.966	319.814	NKAIN2
gene12386	230.125	-1.81337	0.560096	-3.23761	0.00120537	0.0092984	103.865	68.6655	85.4678	105.043	540.207	135.775	187.121	289.644	555.336	TRDN
gene12393	249.982	1.79276	0.481641	3.72218	0.000197507	0.00223396	743.031	254.248	428.407	89.572	133.704	245.271	117.705	174.267	63.6323	FABP7
gene124	63.6297	-2.63625	0.509459	-5.17461	2.28e-07	8.33e-06	15.9792	14.8466	11.7518	75.729	116.452	33.9437	159.959	72.1106	71.8962	LOC106990793
gene12403	841.434	1.31883	0.256557	5.14048	2.74e-07	9.67e-06	1643.86	1146.9	1412.36	654.69	671.754	654.785	475.852	487.948	424.766	LOC101122794
gene12406	115.998	-1.6356	0.482068	-3.39287	0.000691643	0.00600303	44.9414	61.2422	38.4605	120.515	62.5389	84.3118	263.58	163.451	204.946	FAM184A
gene12411	555.834	-1.41881	0.438414	-3.23622	0.00121122	0.00931928	262.658	276.518	248.925	486.946	788.206	236.511	671.021	985.511	1046.21	CEP85L
gene12434	451.333	-1.13895	0.310144	-3.67233	0.000240346	0.00262322	357.534	168.88	225.421	653.875	417.285	690.919	476.858	519.196	552.031	RWDD1
gene12439	825.739	1.25453	0.21901	5.7282	1.02e-08	6.09e-07	1217.41	1184.02	1640.98	561.86	624.311	492.731	615.69	628.564	466.086	TSPYL1
gene12440	1087.46	1.53013	0.23525	6.50425	7.81e-11	8.95e-09	1804.65	1717.57	2260.62	785.79	648.032	789.465	698.184	582.894	499.968	TSPYL4
gene12451	73.0577	-1.87722	0.550732	-3.40859	0.000653005	0.00576919	40.9466	18.5582	19.2303	132.729	72.2432	38.3236	64.3859	195.9	75.2018	HS3ST5
gene12488	201.611	-1.91067	0.379221	-5.03841	4.69e-07	1.52e-05	69.9089	101.142	41.6655	329.788	242.608	140.155	300.803	275.222	313.203	PPIL6
gene12491	293.896	-1.31374	0.370307	-3.5477	0.000388611	0.00385098	159.792	171.664	111.108	244.287	473.355	227.751	301.809	566.068	389.231	LOC101108397
gene12495	343.109	-1.16161	0.319505	-3.63566	0.000277273	0.00293084	155.797	238.473	169.867	500.789	424.833	234.321	397.381	419.443	547.073	ARMC2
gene12500	41.7628	-1.3248	0.343603	-3.85562	0.000115437	0.00145386	21.9714	20.4141	20.2986	48.0431	57.1476	37.2286	59.3557	44.4682	66.9379	NR2E1
gene1251	16402	1.60684	0.499722	3.21547	0.00130233	0.00985379	33336.5	22311.6	33458.5	7714.59	5826.9	20742.9	8157.89	12388.6	3680.76	LOC101102105
gene12529	20.3234	-2.96941	0.664633	-4.46775	7.9e-06	0.00016437	1.9974	3.71165	5.34174	37.4574	16.1738	24.0891	54.3256	21.6332	18.1807	POPDC3
gene12531	5.9936	-5.60509	1.53128	-3.66038	0.00025184	0.00271205	0	0	0	3.25716	10.7826	27.374	2.01206	7.21106	3.30557	LIN28B
gene12564	164.169	-1.5475	0.33946	-4.5587	5.15e-06	0.000115551	49.9349	76.0888	89.7412	148.201	308.381	246.366	160.965	199.506	198.334	FHL5
gene1258	79.1241	-5.86716	1.69181	-3.46798	0.000524387	0.00488822	2.99609	0.927912	2.13669	120.515	22.6434	0	119.717	439.875	3.30557	LOC105615728
gene12624	15.4121	-2.68366	0.651192	-4.12115	3.77e-05	0.000597813	0.998698	3.71165	5.34174	17.9144	38.8172	18.6143	17.1025	18.0276	18.1807	HTR1E
gene12641	32.0192	-2.7062	0.78264	-3.45778	0.000544647	0.00502173	9.98698	9.27912	1.06835	34.2002	38.8172	9.85463	34.205	120.184	30.5766	THEMIS
gene12656	109.819	-1.83037	0.430331	-4.25341	2.11e-05	0.00037276	29.9609	41.756	50.2123	90.3863	232.903	142.345	103.621	88.9364	208.251	TMEM200A
gene12696	258.194	-1.739	0.403724	-4.30741	1.65e-05	0.000306506	76.8998	72.3771	153.842	322.459	260.938	431.414	190.139	301.663	514.017	VNN2
gene12697	779.184	-1.29792	0.354319	-3.66312	0.000249158	0.00269133	346.548	538.189	300.206	954.349	939.161	490.542	1080.48	996.328	1366.85	SLC18B1
gene12714	1268.26	-2.47302	0.510154	-4.8476	1.25e-06	3.46e-05	308.598	418.488	215.806	1598.45	2261.1	421.559	1389.33	1853.24	2947.75	PDE7B
gene12724	94.1423	3.97792	0.801105	4.96554	6.85e-07	2.11e-05	257.664	193.934	300.206	13.0286	49.5998	0	16.0965	6.00922	10.7431	SLC35D3
gene12728	1587.43	-1.08003	0.265449	-4.0687	4.73e-05	0.000720622	758.012	836.049	1138.86	1639.98	1720.9	2693.6	1721.32	1660.95	2117.22	IFNGR1
gene12746	1488.71	1.38061	0.262338	5.26272	1.42e-07	5.61e-06	2336.95	2161.11	3078.98	841.162	1082.57	748.952	1071.42	1273.95	803.254	CITED2
gene12763	298.226	-1.97166	0.446821	-4.41265	1.02e-05	0.000203745	86.8867	158.673	57.6908	538.246	371.999	162.054	347.08	437.471	523.933	ZC2HC1B
gene12777	139.987	-1.4824	0.405409	-3.65656	0.000255625	0.00273457	55.9271	73.305	61.9642	176.701	277.112	72.2673	148.892	186.286	207.425	EPM2A
gene12781	17.7078	-4.73799	1.10439	-4.29013	1.79e-05	0.000327585	0	2.78374	0	9.77149	17.2521	61.3177	14.0844	38.459	15.7015	GRM1
gene12783	19.6007	-2.5345	0.601207	-4.21569	2.49e-05	0.000423926	4.99349	3.71165	5.34174	30.943	15.0956	28.4689	14.0844	45.67	28.0974	ADGB
gene12831	25.5263	-2.38543	0.625713	-3.81233	0.000137661	0.00167898	5.99219	5.56747	8.54678	33.3859	26.9564	8.75967	35.211	67.3032	38.0141	RGS17
gene12888	23.8206	2.18106	0.629984	3.46208	0.000536018	0.00496536	40.9466	47.3235	60.8958	17.1001	11.8608	0	17.1025	8.4129	10.7431	LOC106991323
gene12889	465.259	1.72767	0.459259	3.76186	0.000168651	0.00195603	1063.61	681.087	866.43	293.959	392.485	79.932	362.17	179.075	268.578	LOC106991303
gene12892	421.926	-1.59386	0.46863	-3.4011	0.000671141	0.00587679	125.836	266.311	147.432	454.374	441.007	224.467	685.106	447.086	1005.72	SLC22A3
gene12898	3018.51	-1.98501	0.561689	-3.53399	0.000409331	0.00401375	1150.5	1202.57	693.357	4544.56	4934.1	539.815	4045.24	5063.36	4993.07	PARK2
gene129	295.53	2.05855	0.417853	4.92649	8.37e-07	2.51e-05	778.985	341.472	676.264	149.829	65.7736	206.947	158.953	179.075	102.473	GJB4
gene12909	353.924	-1.75556	0.466129	-3.76626	0.00016571	0.00192962	155.797	179.087	75.8527	367.245	547.754	246.366	303.821	408.627	900.769	PDE10A
gene12918	649.672	1.07315	0.245973	4.36289	1.28e-05	0.000249376	845.897	1129.27	1022.41	539.06	416.207	629.601	472.834	405.021	386.752	RNASET2
gene1292	1454.8	1.19088	0.322477	3.6929	0.000221713	0.0024592	2185.15	2188.94	2604.63	716.576	1133.25	1644.63	996.975	695.867	927.214	SLC39A1
gene12931	7.2239	-5.87971	1.66065	-3.54061	0.000399208	0.0039406	0	0	0	0.814291	4.31303	43.7984	3.01809	4.80737	8.26394	FRMD1
gene12937	231.907	-1.70577	0.424826	-4.01521	5.94e-05	0.000863782	104.863	102.998	69.4426	300.473	140.173	280.309	570.418	265.607	252.876	WDR27
gene12943	278.355	1.04381	0.320368	3.25816	0.00112137	0.00880727	494.356	388.795	388.878	249.173	157.425	143.44	319.917	183.882	179.327	DLL1
gene12959	827.88	-2.37312	0.617767	-3.84145	0.000122311	0.00152635	264.655	260.743	130.338	1317.52	1486.92	118.256	1752.5	1082.86	1037.12	KCNQ5
gene12962	86.6502	-4.45269	0.644614	-6.90753	4.93e-12	8.03e-10	3.99479	12.0629	1.06835	181.587	225.356	122.635	73.4401	72.1106	87.5977	RIMS1
gene12967	133.205	-2.10876	0.433874	-4.8603	1.17e-06	3.31e-05	44.9414	54.7468	24.572	129.472	160.66	84.3118	244.465	252.387	203.293	B3GAT2
gene1297	2588.41	-1.67505	0.463075	-3.61724	0.00029776	0.00311586	1548.98	712.636	892.07	3973.74	3154.98	4323.99	1561.36	5437.14	1690.8	RPS27
gene12974	80.9613	-2.35532	0.390237	-6.03561	1.58e-09	1.24e-07	22.9701	28.7653	12.8202	131.101	138.017	64.6026	107.645	131.001	91.7297	COL19A1
gene12978	52.5366	-2.88305	0.503877	-5.72173	1.05e-08	6.28e-07	13.9818	7.4233	8.54678	53.7432	58.2259	106.211	49.2954	124.992	50.41	ADGRB3
gene130	617.824	2.34722	0.333019	7.04833	1.81e-12	3.46e-10	1689.8	906.57	1394.19	231.259	213.495	247.461	226.357	431.462	219.821	GJB3
gene13008	149.632	1.12744	0.321316	3.50882	0.000450095	0.0043251	291.62	208.78	201.918	80.6148	92.7301	169.719	97.5848	117.781	85.9449	C9H8orf82
gene13046	7313.68	1.74685	0.295457	5.91236	3.37e-09	2.37e-07	13401.5	13271	14573.3	4235.13	4002.49	3479.78	6073.4	2481.81	4304.68	LOC101111462
gene13047	2088.77	2.2779	0.375935	6.05928	1.37e-09	1.13e-07	4046.73	3945.48	5318.23	1128.61	522.954	628.506	1563.37	877.345	767.72	EPPK1
gene13048	54.3549	1.98229	0.600995	3.29835	0.000972542	0.0079009	108.858	131.763	84.3994	35.8288	24.7999	2.18992	49.2954	26.4405	25.6182	LOC105616111
gene13054	2133.42	1.82012	0.21804	8.34765	6.96e-17	3.75e-14	3687.19	3871.25	4700.73	1322.41	924.066	990.938	1341.04	1102.09	1261.08	FAM83H
gene13058	55.1677	1.01637	0.304274	3.34033	0.00083678	0.00698287	70.9076	70.5213	108.971	48.8574	32.3477	40.5135	43.2592	34.8534	46.278	LOC101112989
gene13061	153.561	3.40718	0.396431	8.59464	8.35e-18	5.7e-15	369.518	368.381	424.134	44.786	46.365	29.5639	33.199	52.8811	13.2223	TIGD5
gene13063	126.124	1.74331	0.288157	6.04987	1.45e-09	1.17e-07	277.638	223.627	208.328	47.2289	75.478	62.4127	72.4341	98.5511	69.4171	LOC106991335
gene13069	2.49778	4.81877	1.45846	3.30402	0.000953105	0.00777499	4.99349	2.78374	13.8885	0.814291	0	0	0	0	0	MAFA
gene13088	88.5267	1.92601	0.392142	4.91152	9.04e-07	2.67e-05	230.699	141.971	148.5	38.2717	45.2868	30.6588	56.3376	76.918	28.0974	THEM6
gene13091	56.9435	2.04808	0.429777	4.76546	1.88e-06	4.9e-05	122.84	101.142	121.792	20.3573	10.7826	30.6588	45.2713	21.6332	38.0141	ARC
gene13109	39.3455	-2.16275	0.626878	-3.45003	0.00056053	0.00513452	8.98828	6.49538	20.2986	32.5716	22.6434	100.736	42.2532	30.0461	90.0769	COL22A1
gene13110	34.1918	-2.3867	0.715759	-3.33451	0.000854508	0.00711409	3.99479	19.4862	3.20504	106.672	46.365	21.8992	19.1146	45.67	41.3197	FAM135B
gene13130	32.0136	-1.84623	0.514341	-3.5895	0.000331308	0.00340079	4.99349	11.1349	19.2303	27.6859	30.1912	48.1782	33.199	43.2663	70.2434	TMEM71
gene13133	49.7074	-1.61177	0.456403	-3.53147	0.000413261	0.00403891	28.9622	23.1978	10.6835	105.043	63.6171	39.4185	76.4582	52.8811	47.1044	KCNQ3
gene1314	1293.75	1.04369	0.301317	3.46375	0.000532705	0.00494288	1956.45	1810.36	2143.1	925.848	900.344	1493.52	1025.14	650.197	738.796	UBE2Q1
gene13147	143.203	-2.03669	0.555604	-3.66572	0.000246642	0.00267094	12.9831	64.0259	63.0325	246.73	140.173	332.867	112.675	97.3493	218.994	GSDMC
gene13158	372.992	1.53179	0.318182	4.81419	1.48e-06	3.98e-05	414.46	689.439	880.318	232.073	229.669	153.294	254.525	293.25	209.904	FAM84B
gene13162	4224.49	-1.38174	0.410747	-3.36397	0.000768309	0.00653431	2305	2551.76	1263.86	5251.36	6005.89	1959.98	5688.09	6884.16	6110.35	NSMCE2
gene13173	1202.71	-1.17795	0.266415	-4.42149	9.8e-06	0.000196909	750.022	737.69	471.141	1529.24	1482.6	996.413	1525.14	1693.4	1638.74	TATDN1
gene13179	44.9322	-1.8345	0.441462	-4.15551	3.25e-05	0.000531204	11.9844	28.7653	8.54678	54.5575	67.9302	83.2169	45.2713	52.8811	51.2364	FER1L6
gene13181	114.184	-1.20331	0.369037	-3.26067	0.00111149	0.00875678	56.9258	75.1609	51.2807	202.758	97.0431	89.7866	197.182	128.597	128.917	ANXA13
gene1319	345.715	-1.4756	0.322127	-4.58081	4.63e-06	0.000105048	120.842	193.006	160.252	432.388	604.902	249.651	464.785	403.819	481.787	KCNN3
gene13219	413.566	1.17589	0.361208	3.25543	0.0011322	0.00886098	415.458	709.853	849.336	256.502	337.494	151.104	372.231	276.424	353.696	SNAI2
gene1322	185.949	1.35521	0.336778	4.02405	5.72e-05	0.000838186	270.647	344.255	324.778	147.387	109.982	67.8874	188.127	110.57	109.91	LOC101104627
gene13227	26.7236	-2.20294	0.550296	-4.00318	6.25e-05	0.000899366	5.99219	12.0629	5.34174	41.5288	20.4869	17.5193	42.2532	56.4866	38.8405	ST18
gene13230	3527.8	1.16923	0.211129	5.53798	3.06e-08	1.5e-06	4833.7	4982.89	6989.13	2810.93	2382.95	2596.15	2714.27	2211.39	2228.78	RB1CC1
gene1324	1116.22	1.30683	0.354513	3.68627	0.000227566	0.00250845	1323.28	2233.48	1998.88	806.148	930.535	359.146	879.269	615.344	899.943	SHC1
gene13244	89.7068	-2.4688	0.658509	-3.74908	0.000177483	0.00203996	11.9844	40.8281	13.8885	109.929	115.373	16.4244	132.796	195.9	170.237	XKR4
gene1327	1552.4	2.14892	0.345584	6.21823	5.03e-10	4.83e-08	3538.39	2606.5	3484.95	865.591	555.302	405.135	1136.81	681.445	697.476	ZBTB7B
gene13313	18.5507	-2.26634	0.57727	-3.92597	8.64e-05	0.00116297	4.99349	8.35121	2.13669	27.6859	17.2521	32.8488	33.199	26.4405	14.0487	CPA6
gene13317	30.3031	-1.9285	0.570957	-3.37767	0.000731028	0.00626525	14.9805	9.27912	7.47843	43.9717	20.4869	16.4244	39.2351	45.67	75.2018	C9H8orf34
gene1332	1988.72	2.01819	0.412157	4.89666	9.75e-07	2.84e-05	5369	3192.95	3419.78	818.362	701.945	1975.31	884.299	917.006	619.795	EFNA3
gene13336	293.809	-4.53484	0.669014	-6.77839	1.22e-11	1.83e-09	29.9609	20.4141	5.34174	414.474	642.641	139.06	857.137	139.414	395.842	KCNB2
gene13340	584.237	-1.38494	0.431065	-3.21283	0.00131436	0.00990678	306.6	411.993	126.065	736.119	735.371	337.247	789.733	847.299	967.707	C9H8orf89
gene13341	664.152	-1.69726	0.413341	-4.10619	4.02e-05	0.00063155	355.537	265.383	177.346	936.434	806.536	1426.73	480.882	1022.77	505.753	RPL7
gene13347	419.272	-1.45897	0.359187	-4.06185	4.87e-05	0.0007402	241.685	116.917	222.216	337.116	436.694	529.96	462.773	771.583	654.504	LY96
gene13357	12.9826	-2.97451	0.785324	-3.78763	0.000152094	0.00181273	3.99479	0.927912	2.13669	11.4001	19.4086	6.56975	20.1206	19.2295	33.0557	HNF4G
gene13361	561.002	-1.46499	0.29222	-5.01331	5.35e-07	1.7e-05	251.672	289.509	232.9	486.946	979.057	627.411	630.78	630.968	919.776	ZFHX4
gene13389	28980.2	-1.89585	0.555452	-3.41317	0.000642112	0.0057	12526.7	10533.7	7832.05	22547.7	45101.3	86232.4	11750.4	43501.9	20795.4	LOC101113339
gene13390	13041.1	-3.94297	0.557222	-7.07613	1.48e-12	2.92e-10	1663.83	367.453	1664.49	11247.8	19311.6	34225.1	7328.92	22214.9	19345.9	FABP4
gene13392	920.638	-1.18198	0.354872	-3.33073	0.000866198	0.00718978	430.439	382.3	683.742	648.175	1020.03	877.062	1560.35	1225.88	1457.76	NOV
gene13394	631.597	-2.85284	0.6245	-4.56821	4.92e-06	0.000110856	117.846	162.385	87.6045	664.461	793.597	108.401	800.799	1740.27	1209.01	COLEC10
gene13410	9879.43	-1.78997	0.511428	-3.49995	0.00046535	0.00444046	3675.21	4197.87	3358.88	12012.4	18602.1	2856.75	9401.34	21491.4	13319	TRPS1
gene13415	77.0445	-2.94846	0.576727	-5.11241	3.18e-07	1.09e-05	20.9727	16.7024	4.27339	65.1432	80.8692	194.903	61.3678	170.662	78.5074	CSMD3
gene13423	1489.44	-1.35364	0.399443	-3.38881	0.000701971	0.00606894	827.921	773.879	591.864	2008.85	2349.52	940.57	1259.55	1492.69	3160.13	SYBU
gene13425	334.141	-3.10045	0.445415	-6.9608	3.38e-12	5.89e-10	26.9649	87.2237	51.2807	304.545	524.033	445.648	486.918	298.057	782.595	PKHD1L1
gene13436	36.3185	-2.86473	0.52496	-5.45704	4.84e-08	2.26e-06	11.9844	2.78374	6.41008	82.2433	47.4433	52.558	44.2653	31.2479	47.9308	RSPO2
gene13448	1159.55	-2.7053	0.528688	-5.11701	3.1e-07	1.07e-05	227.703	336.832	178.414	1667.67	2638.49	312.063	1478.86	1858.05	1737.91	ZFPM2
gene13454	149.054	-2.77026	0.487798	-5.67911	1.35e-08	7.71e-07	30.9596	38.0444	22.4353	139.244	351.512	85.4068	137.826	271.617	264.446	RIMS2
gene13485	19752.2	1.18333	0.333632	3.54681	0.000389928	0.00386187	32146.1	24604.5	37773.6	11127.3	15012.6	23220.8	10870.1	12953.5	10061.3	PABPC1
gene13513	451.728	-1.63486	0.432198	-3.78265	0.000155165	0.00183817	216.718	213.42	133.543	732.047	433.459	1113.57	424.544	317.287	480.961	RPL30
gene13528	168.072	1.47013	0.334654	4.39299	1.12e-05	0.000219939	263.656	236.618	378.195	131.915	117.53	146.724	80.4823	88.9364	68.5907	LOC106990367
gene13551	432.937	-1.15938	0.34174	-3.39258	0.000692368	0.00600345	231.698	267.239	213.669	579.775	538.05	237.606	555.328	697.069	575.996	RAD54B
gene13553	822.672	-1.92325	0.507583	-3.78903	0.000151239	0.00180734	191.75	240.329	430.544	442.974	1230.29	1111.38	969.812	580.49	2206.47	GEM
gene13579	30.869	-2.18577	0.624489	-3.50009	0.000465103	0.00444046	6.99089	13.9187	6.41008	38.2717	38.8172	12.0445	31.1869	91.3401	38.8405	CALB1
gene13588	58.0942	-5.23061	0.740569	-7.06296	1.63e-12	3.15e-10	2.99609	3.71165	0	38.2717	94.8866	83.2169	57.3437	82.9272	159.494	CNBD1
gene1359	428.851	-1.44239	0.372025	-3.87712	0.000105702	0.00136414	197.742	281.157	120.723	653.875	403.268	435.794	726.353	358.149	682.601	LOC101107157
gene13590	10.9712	-2.31409	0.68819	-3.36258	0.000772186	0.00656043	4.99349	1.85582	2.13669	10.5858	17.2521	22.9941	8.04823	16.8258	14.0487	CNGB3
gene13593	2207.69	-1.86892	0.494584	-3.77878	0.000157602	0.00185836	746.028	1137.62	508.533	2763.7	3818.11	739.097	2449.68	3924.02	3782.4	WWP1
gene13616	156.08	-2.69184	0.747068	-3.60321	0.000314316	0.00324701	54.9284	12.9908	33.1188	644.918	144.486	32.8488	137.826	150.23	193.376	LOC105616100
gene13625	1984.28	-1.06655	0.241851	-4.40992	1.03e-05	0.000205634	960.748	1403.93	1076.89	2220.57	2940.41	2443.95	2078.46	1920.55	2813.04	ENPP2
gene13670	88.2331	1.14537	0.307749	3.72176	0.000197842	0.00223634	110.855	134.547	172.004	75.729	49.5998	41.6084	72.4341	74.5143	62.8059	KBTBD7
gene13679	18.8556	-2.84806	0.762503	-3.73515	0.000187602	0.00213553	0	4.63956	6.41008	13.8429	51.7563	31.7538	28.1688	10.8166	22.3126	FAM216B
gene13683	1369.81	-1.0631	0.265544	-4.00348	6.24e-05	0.000898946	1052.63	751.609	575.839	1392.44	1587.19	1888.8	1916.49	1806.37	1356.94	ENOX1
gene13704	40.588	-2.35307	0.499134	-4.7143	2.43e-06	6.06e-05	14.9805	11.1349	6.41008	61.0718	72.2432	53.653	25.1507	39.6608	80.9866	ERICH6B
gene1371	18.8994	2.33837	0.484216	4.8292	1.37e-06	3.73e-05	25.9662	55.6747	40.5972	6.51432	5.39128	7.66471	9.05426	6.00922	13.2223	MEX3A
gene13729	596.388	-1.16319	0.267259	-4.35228	1.35e-05	0.000258648	285.628	304.355	389.947	596.875	741.841	529.96	946.673	710.289	861.928	CAB39L
gene1373	5955.77	1.48885	0.342415	4.34808	1.37e-05	0.000263079	11997.4	8544.21	10757.2	2783.25	4635.42	1924.94	5054.29	3671.63	4233.61	LMNA
gene13773	1735.51	1.18268	0.276605	4.27569	1.91e-05	0.00034388	2914.2	2581.45	2808.69	1351.72	1243.23	1549.37	1071.42	721.106	1378.42	FOXO1
gene13789	48.5419	-2.52062	0.741172	-3.40085	0.000671764	0.00587934	1.9974	22.2699	10.6835	35.0145	62.5389	26.279	48.2894	50.4774	179.327	TRPC4
gene13842	1431.77	-2.3525	0.659465	-3.56729	0.000360687	0.00364339	334.564	349.823	464.731	456.003	1770.5	4497	1130.78	574.481	3308.05	MEDAG
gene13854	775.783	1.75776	0.299622	5.86659	4.45e-09	2.99e-07	1094.57	1587.66	1706.15	557.789	486.294	278.12	452.713	335.314	483.44	SLC7A1
gene13856	166.962	-1.26363	0.32935	-3.83673	0.000124682	0.00154724	81.8933	92.7912	84.3994	229.63	266.329	228.846	119.717	147.827	251.224	MTUS2
gene1387	662.489	1.09209	0.209342	5.21678	1.82e-07	6.89e-06	966.74	963.173	1147.41	494.274	444.242	537.625	498.99	365.36	544.593	MEF2D
gene13873	787.365	-2.20919	0.519787	-4.25018	2.14e-05	0.000375835	312.593	207.852	170.936	1470.61	971.509	2047.57	455.731	1039.59	409.891	RPL21
gene13881	5.62994	-5.51522	1.33637	-4.12703	3.67e-05	0.000588427	0	0	0	4.07145	7.5478	13.1395	10.0603	8.4129	7.43754	LOC101115135
gene1389	124.554	1.08574	0.324118	3.34982	0.000808639	0.00679916	125.836	279.301	172.004	98.5292	86.2605	66.7925	111.669	91.3401	89.2505	IQGAP3
gene13893	21.4431	-1.97827	0.504815	-3.91881	8.9e-05	0.00119172	11.9844	7.4233	2.13669	25.243	21.5651	38.3236	28.1688	30.0461	28.0974	SGCG
gene13896	32.9401	-1.35915	0.396764	-3.42559	0.000613469	0.00550201	16.9779	11.1349	20.2986	31.7573	53.9128	37.2286	51.3075	43.2663	30.5766	FGF9
gene13914	1747.19	2.06611	0.383712	5.38455	7.26e-08	3.15e-06	2612.59	3349.76	4679.36	1016.23	1059.93	1255.92	549.292	735.528	466.086	GJB2
gene13940	31.2515	-4.10954	0.837024	-4.90971	9.12e-07	2.69e-05	0	4.63956	3.20504	21.9858	42.052	99.6413	15.0904	64.8995	29.7502	KLHL1
gene1396	1430.01	1.23766	0.276645	4.47384	7.68e-06	0.000160374	2095.27	2339.27	2528.78	1015.42	798.988	1430.02	950.697	1032.38	679.295	CRABP2
gene13968	1098.22	-1.23796	0.342487	-3.61461	0.0003008	0.00314027	791.968	525.198	411.314	1423.38	1380.17	1574.55	863.173	1921.75	992.499	LOC101103163
gene13978	217.23	1.36301	0.331013	4.11771	3.83e-05	0.000605637	308.598	480.658	310.889	186.473	97.0431	186.143	96.5788	135.808	152.883	SLAIN1
gene13979	1266.3	1.45666	0.246499	5.90939	3.43e-09	2.39e-07	1583.94	2574.03	2434.76	794.748	965.04	790.56	623.738	781.198	848.706	EDNRB
gene1400	847.89	2.15872	0.224405	9.61976	6.6e-22	9.01e-19	1796.66	1568.17	1905.93	405.517	502.468	361.336	426.556	304.066	360.308	HDGF
gene14004	407.42	-2.61951	0.394407	-6.64165	3.1e-11	4.11e-09	111.854	118.773	44.8706	528.475	683.615	330.678	647.883	753.556	447.079	GPC5
gene14022	1034.1	1.12357	0.330685	3.3977	0.000679552	0.00591254	1653.84	1300	1898.45	914.448	670.676	921.955	754.522	826.868	366.092	SOX21
gene14028	7.9103	-4.0941	1.21138	-3.37971	0.000725633	0.00622502	0.998698	0	1.06835	4.07145	12.9391	5.47479	15.0904	21.6332	9.91672	LOC101106781
gene14046	21.3355	-2.45966	0.744967	-3.3017	0.000961009	0.00783545	6.99089	3.71165	5.34174	21.1716	72.2432	7.66471	28.1688	12.0184	34.7085	LOC101109626
gene14053	460.604	-2.38899	0.61757	-3.86837	0.000109565	0.00139774	100.869	222.699	37.3922	635.961	906.814	122.635	653.919	830.474	634.67	HS6ST3
gene14087	38.2911	-1.80442	0.414181	-4.35659	1.32e-05	0.000255962	10.9857	13.9187	18.1619	43.9717	51.7563	60.2227	39.2351	73.3124	33.0557	NALCN
gene14089	46.1524	-1.50604	0.468016	-3.21793	0.0012912	0.00979045	30.9596	20.4141	10.6835	53.7432	98.1213	38.3236	37.2231	56.4866	69.4171	FGF14
gene14106	35.7148	-1.95615	0.504274	-3.87914	0.000104825	0.00135478	17.9766	12.0629	6.41008	23.6144	60.3824	64.6026	32.1929	63.6977	40.4933	FAM155A
gene14111	57.6956	-2.05896	0.446291	-4.6135	3.96e-06	9.19e-05	12.9831	22.2699	20.2986	71.6576	65.7736	41.6084	60.3617	133.405	90.9033	MYO16
gene14144	2783.66	1.28795	0.234395	5.49481	3.91e-08	1.86e-06	4881.64	4270.25	4620.6	1806.1	1619.54	2558.92	2046.26	1479.47	1770.13	CUL4A
gene14150	390.862	1.63995	0.324151	5.05922	4.21e-07	1.39e-05	510.335	1008.64	623.915	284.187	244.764	206.947	294.766	170.662	173.543	TFDP1
gene14191	22.046	-2.73565	0.739251	-3.70056	0.000215121	0.00240108	8.98828	3.71165	1.06835	23.6144	19.4086	74.4572	13.0784	27.6424	26.4446	ANKFN1
gene14197	454.307	-1.04525	0.294559	-3.54852	0.000387409	0.00384649	246.678	334.976	215.806	605.018	447.476	385.425	645.871	481.939	725.574	DGKE
gene14198	1006.05	1.11008	0.177095	6.26828	3.65e-10	3.68e-08	1404.17	1574.67	1721.11	643.29	691.162	780.706	803.817	669.427	766.067	TRIM25
gene14212	430.291	1.13557	0.310356	3.65891	0.00025329	0.00272398	748.025	534.477	744.638	276.859	389.251	434.699	289.736	197.102	257.835	CUEDC1
gene14233	1009.67	1.18648	0.296765	3.99805	6.39e-05	0.000913881	1676.81	1467.96	1691.19	526.846	810.849	1057.73	736.413	622.555	496.662	SUPT4H1
gene14235	313.039	-1.55779	0.440232	-3.53857	0.000402296	0.00396227	138.819	178.159	91.8779	469.031	409.737	125.92	519.111	485.545	399.148	HSF5
gene14248	220.188	1.14213	0.254775	4.4829	7.36e-06	0.000154566	332.566	303.427	403.835	189.73	158.504	194.903	145.874	132.203	120.653	SMG8
gene14271	22.1208	-6.53129	1.27889	-5.107	3.27e-07	1.12e-05	0.998698	0	0	43.9717	49.5998	16.4244	40.2412	28.8442	19.0071	TBX4
gene14274	3169.39	-1.76866	0.497866	-3.55249	0.000381603	0.00380275	1501.04	1281.45	867.498	4770.93	5082.9	884.727	4144.84	6023.64	3967.52	BCAS3
gene14296	38.1345	-1.63898	0.483293	-3.39128	0.000695663	0.00602614	19.974	16.7024	10.6835	65.9575	71.1649	24.0891	34.205	64.8995	35.5349	C11H17orf78
gene14307	37.8896	-7.3089	2.1462	-3.40551	0.000660402	0.00580853	0	0	1.06835	32.5716	8.62605	129.205	0	167.056	2.47918	LOC101110524
gene14309	538.707	-7.50468	1.04701	-7.16773	7.63e-13	1.71e-10	6.99089	0	6.41008	1262.15	194.086	520.105	208.248	2574.35	76.0282	LOC101110777
gene14326	1638.6	1.21819	0.196044	6.21388	5.17e-10	4.91e-08	2196.14	2711.36	3023.42	1187.24	1159.13	1040.21	979.872	1150.16	1299.92	AP2B1
gene14332	60.2309	-1.76126	0.526332	-3.3463	0.000818987	0.00685433	24.9675	30.6211	13.8885	119.701	53.9128	40.5135	66.3979	146.625	45.4516	LOC101113607
gene14347	7.70987	-5.97431	1.68824	-3.53878	0.000401982	0.00396138	0	0	0	0.814291	12.9391	43.7984	4.02412	1.20184	6.61115	LOC101119832
gene14350	118.586	-2.58942	0.52147	-4.96563	6.85e-07	2.11e-05	26.9649	49.1793	5.34174	201.13	164.973	112.781	122.736	213.928	170.237	ASIC2
gene14355	130.891	1.24993	0.364918	3.42523	0.000614279	0.00550372	185.758	235.69	217.943	87.9434	108.904	139.06	45.2713	91.3401	66.1115	TMEM98
gene14363	285.822	1.25485	0.258534	4.8537	1.21e-06	3.38e-05	438.428	601.287	358.965	182.401	168.208	210.232	227.363	223.543	161.973	RHBDL3
gene14379	184.895	1.64487	0.292355	5.62626	1.84e-08	9.85e-07	271.646	306.211	436.954	96.9006	146.643	96.3564	130.784	90.1382	88.4241	RAB11FIP4
gene14384	1776.01	-1.58595	0.457534	-3.46631	0.000527654	0.0049067	806.948	898.219	576.908	3132.58	1809.31	625.221	2776.64	2724.58	2633.72	KSR1
gene14389	211.283	1.09227	0.286824	3.80814	0.000140014	0.00170415	313.591	320.13	347.213	107.486	129.391	216.802	184.103	124.992	157.841	LYRM9
gene14394	480.994	1.41253	0.300653	4.6982	2.62e-06	6.5e-05	682.111	750.681	1039.5	301.288	208.104	422.654	344.062	236.763	343.78	TNFAIP1
gene14404	985.579	1.14658	0.23946	4.78821	1.68e-06	4.46e-05	1708.77	1411.35	1540.56	850.119	642.641	858.448	740.437	533.618	584.26	PIGS
gene14409	1119.56	1.08835	0.272697	3.99108	6.58e-05	0.000935883	1320.28	1957.89	1914.48	866.405	623.232	912.101	1066.39	617.747	797.47	KIAA0100
gene14426	2586.84	1.39078	0.291136	4.77708	1.78e-06	4.66e-05	4312.38	4488.31	4408	2498.24	1480.45	1169.42	2057.33	1425.39	1442.06	MYO18A
gene14434	577.74	1.37572	0.241653	5.69297	1.25e-08	7.22e-07	955.754	968.74	1012.79	420.988	351.512	355.862	502.008	269.213	362.787	GIT1
gene14453	2262.83	1.14354	0.315322	3.62656	0.000287219	0.00302783	3528.4	3332.13	3827.89	1468.98	1535.44	2775.72	1315.89	1373.71	1207.36	NXN
gene1447	130.762	-2.45137	0.738808	-3.318	0.000906648	0.00747458	19.974	15.7745	63.0325	36.6431	130.469	282.499	124.748	64.8995	438.815	LOC101111409
gene14478	3186.55	1.21958	0.352115	3.46358	0.000533034	0.00494288	3955.84	5366.11	6106.67	2179.86	1946.25	3692.2	2336	1278.76	1817.24	PRPF8
gene14486	133.704	-1.1081	0.306546	-3.6148	0.000300577	0.00313979	71.9063	77.9446	76.921	149.829	128.313	131.395	236.417	129.799	200.814	RTN4RL1
gene14502	725.709	2.00544	0.242357	8.27473	1.29e-16	6.53e-14	1451.11	1362.17	1546.97	351.774	325.633	401.85	481.888	259.598	350.391	CLUH
gene14530	236.469	-1.04936	0.296882	-3.53459	0.000408402	0.00400907	168.78	115.061	130.338	202.758	306.225	330.678	219.314	271.617	383.447	ASPA
gene14534	468.886	1.02463	0.257393	3.98079	6.87e-05	0.000968052	748.025	672.736	708.314	407.96	232.903	325.203	378.267	305.268	441.294	CTNS
gene14535	2023.46	1.05794	0.296722	3.56544	0.00036324	0.00366292	3521.41	2649.19	3117.44	1335.44	1945.17	2107.8	1276.65	1120.12	1137.94	TAX1BP3
gene14537	201.79	1.12805	0.296861	3.79992	0.000144743	0.00175211	261.659	344.255	341.871	122.958	136.939	222.277	103.621	147.827	134.702	P2RX5
gene14554	1025.11	1.85095	0.471606	3.92478	8.68e-05	0.00116786	2757.41	1297.22	1880.29	564.303	382.781	1080.72	529.171	516.793	217.341	GGT6
gene14555	41.3266	-1.83696	0.548789	-3.34729	0.000816065	0.00683893	27.9635	9.27912	8.54678	93.6434	25.8782	41.6084	63.3798	39.6608	61.9795	TEKT1
gene14575	61.7105	-1.24058	0.361459	-3.43215	0.000598819	0.00540063	25.9662	39.9002	30.9821	70.8433	43.1303	84.3118	106.639	81.7253	71.8962	NLRP1
gene14592	4081.69	1.80117	0.280233	6.42741	1.3e-10	1.43e-08	8238.26	6298.67	8803.18	2093.54	2070.25	3463.35	1931.58	1977.03	1859.39	KIF1C
gene1460	40.1451	-1.18114	0.351037	-3.36473	0.000766198	0.0065226	17.9766	26.9094	20.2986	52.9289	36.6607	37.2286	58.3497	58.8903	52.0628	SPTA1
gene14600	971.486	1.33049	0.387814	3.43074	0.00060193	0.00542593	1824.62	1416.92	1628.16	571.632	552.067	1261.39	564.382	556.453	367.745	SLC25A11
gene14601	139.982	2.57307	0.406165	6.33504	2.37e-10	2.51e-08	423.448	323.841	195.508	42.3431	31.2694	43.7984	93.5607	56.4866	49.5836	GP1BA
gene14628	822.213	1.5488	0.389884	3.97246	7.11e-05	0.000994646	2210.12	852.751	1332.23	538.246	758.014	459.883	524.141	441.076	283.453	SLC16A11
gene14635	349.752	1.74838	0.287266	6.08626	1.16e-09	9.96e-08	622.189	672.736	678.401	206.83	163.895	298.924	194.164	134.606	176.022	DVL2
gene14643	651.394	2.07637	0.257658	8.05862	7.72e-16	3.34e-13	1513.03	1070.81	1392.06	311.059	398.955	285.784	330.984	342.525	217.341	EIF5A
gene14662	1335.39	1.72779	0.298469	5.78885	7.09e-09	4.51e-07	1996.4	2714.14	2783.05	681.561	715.962	1137.66	808.847	499.967	680.948	POLR2A
gene14673	157.127	2.19136	0.432054	5.07196	3.94e-07	1.32e-05	205.732	324.769	454.048	102.601	56.0693	51.4631	98.5908	32.4498	88.4241	ATP1B2
gene14674	1714.5	1.44949	0.24872	5.82781	5.62e-09	3.68e-07	3217.81	2658.47	3030.9	1104.99	1228.13	1422.35	1097.58	865.327	804.907	TP53
gene14676	34.233	1.72926	0.431062	4.01162	6.03e-05	0.000874511	29.9609	79.8004	82.2628	20.3573	20.4869	16.4244	25.1507	20.4313	13.2223	EFNB3
gene14678	1005.66	1.11866	0.239362	4.6735	2.96e-06	7.14e-05	1589.93	1524.56	1597.18	593.618	663.128	909.911	825.95	538.426	808.213	KDM6B
gene14682	2633.07	1.65414	0.318859	5.18769	2.13e-07	7.84e-06	4797.75	4766.68	4925.08	1443.74	1551.61	2577.53	1446.67	1109.3	1079.27	CHD3
gene14686	410.077	1.02241	0.268625	3.8061	0.000141178	0.00171597	591.229	716.348	552.336	330.602	253.39	417.179	316.899	212.726	299.981	CNTROB
gene14688	1704.22	1.22481	0.27778	4.40929	1.04e-05	0.000206005	2961.14	1897.58	3406.96	1445.37	1028.66	1478.19	1079.47	1069.64	971.012	ALOX15B
gene14710	270.192	1.57868	0.463564	3.40553	0.000660353	0.00580853	575.25	371.165	509.602	118.886	150.956	369.001	131.79	114.175	90.9033	BORCS6
gene14723	738.607	2.25331	0.654996	3.4402	0.00058129	0.00527738	1635.87	1615.49	1431.59	388.417	848.588	84.3118	385.309	156.24	101.646	SLC25A35
gene14737	2044.5	-1.04397	0.274473	-3.80354	0.000142642	0.00172785	1521.02	1211.85	857.883	2167.64	2267.57	3443.65	2204.21	2522.67	2203.99	STX8
gene14752	7.11949	3.14194	0.840725	3.73718	0.000186095	0.0021211	15.9792	7.4233	28.8454	4.07145	2.15651	2.18992	1.00603	2.40369	0	LOC443471
gene14755	727.754	1.04771	0.199951	5.23981	1.61e-07	6.23e-06	998.698	1074.52	1256.38	572.446	467.963	602.227	605.629	457.902	514.017	LOC101113508
gene14759	29.2572	3.48711	0.521954	6.68089	2.37e-11	3.32e-09	74.9024	86.2958	61.9642	6.51432	12.9391	10.9496	2.01206	3.60553	4.13197	PIRT
gene14767	211.01	-1.63249	0.37483	-4.35528	1.33e-05	0.000256524	54.9284	131.763	76.921	268.716	268.486	292.354	251.507	161.047	393.363	MYOCD
gene14768	110.539	1.4586	0.376755	3.87148	0.000108175	0.00138599	205.732	165.168	205.123	96.9006	86.2605	59.1278	92.5547	49.2756	34.7085	ARHGAP44
gene1478	409.817	-2.97023	0.728827	-4.07535	4.59e-05	0.000704559	63.9167	76.0888	81.1944	185.658	792.519	1650.1	157.947	145.423	535.503	ACKR1
gene14807	200.653	1.42432	0.439692	3.23935	0.00119802	0.00926589	325.576	273.734	435.886	172.63	119.686	38.3236	179.073	137.01	123.959	LOC101109027
gene14818	430.702	1.85906	0.30697	6.05618	1.39e-09	1.14e-07	878.854	672.736	947.624	320.83	262.016	167.529	266.598	203.111	157.015	SHMT1
gene14819	473.974	1.47437	0.308264	4.78281	1.73e-06	4.55e-05	703.084	769.239	1008.52	336.302	231.825	421.559	336.014	192.295	266.925	SMCR8
gene14823	1067.69	1.48711	0.404942	3.67239	0.000240291	0.00262322	1761.7	1758.39	2087.55	561.86	673.91	1344.61	572.43	457.902	390.884	LLGL1
gene14827	559.475	1.27995	0.211278	6.05812	1.38e-09	1.13e-07	957.752	881.516	921.984	403.074	291.129	471.927	390.339	360.553	357.002	GID4
gene14831	2152.08	1.54385	0.271658	5.68305	1.32e-08	7.56e-07	4172.56	3164.18	4151.6	1134.31	914.362	1721.28	1633.79	1198.24	1278.43	SREBF1
gene14844	1392.47	2.25117	0.360321	6.24768	4.17e-10	4.13e-08	2027.36	2898.8	3899.47	748.333	650.189	294.544	775.648	552.848	685.08	USP22
gene14848	968.94	2.3554	0.3399	6.92968	4.22e-12	7e-10	2348.94	1670.24	2249.94	353.402	343.964	707.343	366.195	411.03	269.404	NATD1
gene14877	1071.29	1.45577	0.378303	3.84815	0.000119012	0.00149358	1596.92	1959.75	2019.18	710.061	673.91	1246.06	570.418	405.021	460.301	LRRC59
gene14882	37.3472	1.41703	0.338059	4.19168	2.77e-05	0.000463182	62.918	59.3864	69.4426	17.9144	28.0347	20.8042	34.205	25.2387	18.1807	TMEM92
gene14887	2004.2	1.47633	0.314622	4.69241	2.7e-06	6.61e-05	4206.52	3019.43	3268.07	1234.46	1368.31	1930.41	1242.45	943.447	824.741	PPP1R9B
gene14890	617.718	1.69859	0.447511	3.79564	0.000147261	0.00177654	895.832	1292.58	1252.1	411.217	288.973	130.3	619.714	243.974	424.766	ITGA3
gene14891	4133.36	2.24565	0.516868	4.34473	1.39e-05	0.000266053	9273.91	7631.15	9260.44	1911.14	1715.51	4458.67	908.444	914.603	1126.37	DLX3
gene14892	511.762	1.59928	0.393571	4.0635	4.83e-05	0.000735622	953.757	818.418	1002.11	260.573	306.225	598.942	211.266	182.68	271.883	DLX4
gene14902	127.997	1.93199	0.382274	5.05394	4.33e-07	1.43e-05	182.762	218.059	355.76	66.7718	74.3997	38.3236	89.5366	42.0645	84.2921	NGFR
gene14911	10.0695	-2.79222	0.824067	-3.38834	0.000703175	0.00607048	0.998698	0.927912	4.27339	10.5858	21.5651	21.8992	6.03617	14.4221	9.91672	B4GALNT2
gene14931	94.1225	2.08563	0.503698	4.14064	3.46e-05	0.000559614	236.691	164.24	174.141	19.543	34.5042	101.831	49.2954	42.0645	24.7918	HOXB2
gene14937	2993.24	1.76173	0.506113	3.48091	0.000499713	0.00469519	5673.6	4541.2	6730.59	1943.71	1631.4	346.007	2793.74	1755.89	1523.04	NFE2L1
gene1496	181.944	-1.19428	0.34112	-3.50105	0.000463437	0.00442934	117.846	95.5749	80.1261	154.715	224.277	324.108	253.519	139.414	247.918	CFAP45
gene14965	35.1517	2.97144	0.53877	5.51522	3.48e-08	1.68e-06	75.9011	57.5305	118.587	17.1001	17.2521	12.0445	5.03014	9.61474	3.30557	C11H17orf96
gene14978	262.406	-1.4697	0.43901	-3.34777	0.000814647	0.00683566	156.796	132.691	71.5793	603.389	243.686	417.179	213.278	317.287	205.772	RPL23
gene14982	2465.8	1.13467	0.235311	4.82202	1.42e-06	3.85e-05	3382.59	3570.61	4660.13	1453.51	2074.57	2195.39	1647.88	1516.73	1690.8	LASP1
gene15003	2184.71	1.85771	0.342879	5.41799	6.03e-08	2.71e-06	4358.32	3879.6	4432.57	1296.35	752.623	1872.38	1374.24	850.905	845.401	ERBB2
gene15012	882.308	1.49681	0.308089	4.85837	1.18e-06	3.33e-05	1652.85	1287.01	1708.29	479.617	652.345	354.767	624.744	413.434	767.72	ORMDL3
gene15015	3988.93	1.72589	0.360341	4.78959	1.67e-06	4.44e-05	8497.92	5559.12	8316.02	2770.22	1484.76	3700.96	2175.03	1872.47	1523.87	GSDMA
gene15017	30.0355	-4.0277	1.055	-3.81773	0.000134683	0.00164718	4.99349	0.927912	2.13669	6.51432	26.9564	167.529	14.0844	10.8166	36.3613	CSF3
gene15020	1023.25	2.3179	0.323286	7.16979	7.51e-13	1.71e-10	2156.19	2063.68	2353.57	614.789	511.094	225.562	492.954	417.04	374.356	THRA
gene15024	755.958	1.77628	0.419668	4.23259	2.31e-05	0.00040023	1247.37	1644.26	1404.88	666.904	224.277	259.505	639.834	272.818	443.773	RAPGEFL1
gene15039	4879.32	2.26292	0.390707	5.79185	6.96e-09	4.45e-07	12047.3	8088.61	10860.8	1679.88	2797	3806.08	1865.18	1401.35	1367.68	LOC101110427
gene15048	699.764	1.51082	0.432016	3.49714	0.00047028	0.00446948	1147.5	1112.57	1440.13	298.03	594.119	825.599	360.158	251.185	268.578	KRT40
gene15049	22263.3	1.74583	0.403113	4.33086	1.49e-05	0.000282695	36574.3	32455.6	56488.9	11690	13533.2	23039	8535.15	10901.9	7151.61	BIIIB4
gene15050	14044.7	1.63697	0.322506	5.07577	3.86e-07	1.3e-05	21955.4	18222.3	36753.3	9382.26	8242.19	11151.1	6721.28	8295.12	5679.8	LOC101111893
gene15051	39235.9	2.148	0.329452	6.51992	7.03e-11	8.11e-09	63870.7	74476.1	104976	16341.2	18948.2	30018.3	14969.7	16573.4	12949.6	LOC101112404
gene15052	9108.01	1.28184	0.380585	3.36807	0.000756974	0.00645336	12866.2	12416.4	19693.9	7648.63	6881.43	8905.3	3178.05	6507.98	3874.13	LOC101113159
gene15053	17251.4	1.87365	0.35877	5.22244	1.77e-07	6.73e-06	31427	21344.8	47671.8	8061.48	11469.4	13049.7	8494.91	8144.89	5598.82	KRTAP1-1
gene15056	19734	1.80618	0.503284	3.5888	0.000332207	0.00340805	32926.1	25410.9	54651.3	9633.87	12049.5	23612.8	4655.9	7606.46	7059.05	LOC101112657
gene15063	1415.74	1.68487	0.492781	3.4191	0.000628282	0.00560092	2613.59	1327.84	3913.36	827.319	1101.98	1239.49	468.809	941.043	308.245	LOC101114537
gene15065	5123.55	3.96666	0.536447	7.39432	1.42e-13	3.94e-11	7982.59	9866.49	23032.5	316.759	1909.59	694.204	732.389	808.84	768.546	LOC101115634
gene15066	4983.04	2.73363	0.545524	5.01103	5.41e-07	1.72e-05	7999.57	8425.44	18054	2018.63	3021.27	1110.29	731.383	2770.25	716.483	LOC101116068
gene15067	247.532	1.99584	0.446907	4.46589	7.97e-06	0.000165223	449.414	481.586	552.336	83.8719	164.973	250.746	78.4703	69.7069	96.688	LOC105611408
gene15068	4802.16	3.16373	0.3501	9.03665	1.62e-19	1.59e-16	10505.3	9821.95	15006	1055.32	1535.44	2171.3	1243.45	835.281	1045.39	LOC101107617
gene15078	9383.08	1.33819	0.367371	3.64263	0.00026987	0.00286453	22300.9	9569.56	15279.5	6783.04	5269.44	9287.44	5785.67	6510.38	3661.75	KRT15
gene15081	58419.4	1.42665	0.337506	4.22705	2.37e-05	0.000407032	136582	68350	96546.6	42260.9	41629.3	46728.5	37141.6	36418.2	20117.7	LOC101118459
gene15082	430.94	2.75043	0.710986	3.86848	0.000109517	0.00139774	91.8802	1939.34	958.308	94.4577	154.191	327.393	100.603	108.166	104.126	LOC101108147
gene15088	14754.6	1.51571	0.46019	3.29366	0.000988934	0.0079934	25706.5	22384.9	30046.2	8197.46	6222.62	20729.8	8533.14	5524.87	5445.93	JUP
gene15103	479.466	1.49075	0.317837	4.6903	2.73e-06	6.67e-05	745.029	973.38	802.329	317.573	300.834	462.073	303.821	215.13	195.029	KAT2A
gene15105	879.998	1.56395	0.277201	5.64194	1.68e-08	9.16e-07	1519.02	1372.38	1832.22	408.774	740.762	609.892	575.449	448.287	413.197	RAB5C
gene15113	1929.71	1.72712	0.403712	4.27809	1.88e-05	0.000341918	2995.1	3162.32	4669.75	850.934	1734.91	623.032	1434.6	624.958	1271.82	PTRF
gene15132	1004.15	1.0288	0.210786	4.88078	1.06e-06	3.04e-05	1781.68	1403.93	1378.17	769.505	720.275	912.101	782.691	623.757	665.247	VPS25
gene15150	315.159	1.44359	0.296279	4.87241	1.1e-06	3.16e-05	445.419	526.126	663.444	202.758	180.069	124.825	278.67	201.91	213.21	RUNDC1
gene15154	4176.62	1.44945	0.296196	4.89356	9.9e-07	2.88e-05	9270.92	4972.68	7454.93	2341.9	2198.57	3681.25	2964.77	2621.22	2083.34	VAT1
gene15172	60.1689	1.52198	0.408099	3.72944	0.000191907	0.00217478	98.8711	106.71	114.313	52.1146	37.739	13.1395	49.2954	28.8442	40.4933	MPP2
gene15186	1075.85	1.33081	0.308862	4.30876	1.64e-05	0.000305274	1779.68	1709.21	1904.86	735.304	588.728	1191.32	671.021	561.261	541.288	ATXN7L3
gene15189	90.723	4.42496	0.471925	9.37642	6.83e-21	8.08e-18	203.734	249.608	293.796	13.8429	23.7216	5.47479	14.0844	4.80737	7.43754	SLC4A1
gene15193	78.8112	2.56978	0.473742	5.42442	5.81e-08	2.62e-06	203.734	120.629	206.191	26.8716	45.2868	7.66471	43.2592	30.0461	25.6182	FAM171A2
gene15197	681.812	2.03475	0.631109	3.22409	0.00126374	0.00963157	1582.94	1160.82	1379.24	164.487	456.103	874.872	212.272	229.552	76.0282	FZD2
gene152	319.459	1.1141	0.288753	3.85834	0.000114162	0.00144154	518.324	495.505	480.756	284.187	319.164	145.63	211.266	221.139	199.161	CLSPN
gene15213	131.595	1.04203	0.252006	4.13492	3.55e-05	0.000571661	232.697	180.015	188.029	96.9006	83.0258	110.591	124.748	86.5327	81.813	DCAKD
gene15214	762.071	-1.34032	0.38038	-3.52363	0.000425673	0.0041194	413.461	498.289	219.011	1012.16	970.431	441.268	1048.28	1141.75	1113.98	NMT1
gene15247	55.1966	-2.70178	0.434485	-6.21835	5.02e-10	4.83e-08	9.98698	16.7024	8.54678	45.6003	75.478	91.9765	68.41	68.5051	111.563	EFCAB13
gene15257	783.649	2.31545	0.307987	7.51799	5.56e-14	1.67e-11	1118.54	1815	2098.23	381.902	434.537	359.146	304.827	217.534	323.12	MRC2
gene15264	235.409	2.52309	0.624655	4.03917	5.36e-05	0.000798437	346.548	494.577	730.75	87.9434	181.147	9.85463	114.687	69.7069	83.4657	CYB561
gene15276	495.993	1.35239	0.380734	3.55206	0.000382224	0.00380681	777.986	883.372	841.858	336.302	260.938	613.177	294.766	177.873	277.668	FTSJ3
gene15292	122.169	-2.00277	0.448596	-4.46454	8.02e-06	0.000166078	30.9596	40.8281	50.2123	77.3576	95.9648	167.529	146.88	231.956	257.835	MILR1
gene15295	1343.94	-1.0423	0.269218	-3.87158	0.000108133	0.00138599	764.004	1042.05	556.609	1762.94	1472.9	1565.79	1665.98	1272.75	1992.43	CEP95
gene15304	2521.73	-2.15514	0.440695	-4.89033	1.01e-06	2.91e-05	696.093	942.759	651.692	3608.94	3778.21	1043.5	3388.31	3110.37	5475.68	PITPNC1
gene15326	257.367	1.3156	0.38506	3.41662	0.000634041	0.00564607	517.326	313.634	452.979	170.187	173.599	310.968	114.687	153.836	109.084	OGFOD3
gene15327	56.71	2.03452	0.624117	3.25984	0.00111475	0.00877859	172.775	54.7468	115.382	17.9144	23.7216	67.8874	27.1628	6.00922	24.7918	UTS2R
gene15338	7089	1.62499	0.308977	5.25927	1.45e-07	5.67e-06	15941.2	9468.41	13294.5	4158.58	3296.23	5769.34	5334.97	3468.52	3069.23	FASN
gene15363	132.457	1.11906	0.344312	3.25014	0.00115347	0.00899183	215.719	225.483	178.414	61.8861	106.747	130.3	109.657	109.368	54.542	SLC25A10
gene15366	66.7097	1.6544	0.504176	3.28139	0.00103296	0.00828378	117.846	129.908	119.655	52.1146	30.1912	7.66471	63.3798	43.2663	36.3613	ARL16
gene15376	52557.9	1.05674	0.326368	3.23788	0.00120421	0.00929353	93050.7	64798.9	83310.8	35658.6	40770	59231.8	27830.8	43708.6	24661.2	ACTG1
gene15377	380.349	1.31238	0.309921	4.23458	2.29e-05	0.000397485	491.36	825.842	579.044	263.83	230.747	252.935	382.291	183.882	213.21	BAHCC1
gene15408	284.171	1.77899	0.415394	4.28265	1.85e-05	0.000337054	531.307	349.823	735.023	108.301	235.06	127.015	210.26	78.1198	182.633	C1QTNF1
gene15410	462.186	1.36654	0.404246	3.38047	0.000723608	0.00621065	744.03	726.555	871.772	201.944	370.92	566.094	241.447	165.854	271.057	LGALS3BP
gene15429	62.7048	1.3599	0.407416	3.33787	0.000844233	0.00703514	104.863	89.0795	123.928	75.729	26.9564	33.9437	49.2954	32.4498	28.0974	LOC106991439
gene1543	2688.64	1.25018	0.264531	4.72604	2.29e-06	5.78e-05	4391.28	4197.87	4556.5	2147.28	1422.22	2564.39	1906.42	1395.34	1616.43	PVRL4
gene15458	508.623	1.77118	0.314312	5.63512	1.75e-08	9.44e-07	693.097	1040.19	1153.82	325.716	238.295	247.461	414.484	193.497	271.057	UBE2O
gene15482	648.838	1.50561	0.340572	4.42082	9.83e-06	0.000197299	1044.64	1067.1	1315.14	449.488	388.172	188.333	562.37	368.966	455.343	WBP2
gene15495	558.241	1.42977	0.278458	5.1346	2.83e-07	9.92e-06	1130.53	861.102	892.07	327.345	242.608	346.007	517.099	341.323	366.092	LLGL2
gene15497	497.021	2.07308	0.241605	8.58047	9.45e-18	5.99e-15	916.805	1086.58	1028.82	207.644	276.034	210.232	317.905	188.689	240.481	CASKIN2
gene15514	347.423	1.67608	0.394476	4.24887	2.15e-05	0.000377389	530.309	659.745	733.955	292.33	178.991	75.5522	232.393	183.882	239.654	KCTD2
gene15528	19.4069	2.27248	0.65303	3.4799	0.000501602	0.00471044	27.9635	34.3327	60.8958	0.814291	5.39128	15.3294	14.0844	8.4129	7.43754	GRIN2C
gene1553	472.617	1.32963	0.270933	4.90758	9.22e-07	2.71e-05	876.857	695.934	795.919	341.188	213.495	406.23	375.249	290.846	257.835	B4GALT3
gene15531	1828.27	1.74021	0.326133	5.33588	9.51e-08	3.98e-06	3825.01	2541.55	3926.18	1166.88	847.51	1370.89	1339.02	767.978	669.379	SLC9A3R1
gene15540	11.2584	-2.18367	0.637298	-3.42645	0.000611521	0.00549287	2.99609	1.85582	5.34174	18.7287	14.0173	21.8992	12.0723	12.0184	12.3959	LOC101105174
gene15553	260.218	2.47232	0.340123	7.26891	3.62e-13	8.77e-11	467.391	498.289	756.39	114.815	125.078	55.8429	138.832	85.3309	99.9936	CDC42EP4
gene15555	323.391	1.06982	0.250596	4.26909	1.96e-05	0.000352772	402.475	519.631	568.361	239.401	219.964	297.829	276.658	188.689	197.508	FAM104A
gene15558	36.2426	3.52566	0.653167	5.39778	6.75e-08	2.97e-06	124.837	52.891	100.425	16.2858	6.46954	15.3294	1.00603	4.80737	4.13197	SSTR2
gene1558	233.284	1.2639	0.336655	3.75429	0.000173831	0.00200317	447.417	296.932	400.63	145.758	132.626	260.6	154.928	159.845	100.82	TOMM40L
gene15597	6.50872	2.69132	0.837141	3.2149	0.00130491	0.00986911	10.9857	17.6303	16.0252	3.25716	0	0	3.01809	6.00922	1.65279	CACNG5
gene15624	767.359	1.68719	0.413764	4.07766	4.55e-05	0.000699427	1531	1083.8	1645.26	545.575	533.737	719.388	278.67	360.553	208.251	FMOD
gene15625	639.73	3.28733	0.498073	6.60009	4.11e-11	5.25e-09	926.792	1701.79	2150.58	183.215	267.408	56.9379	212.272	81.7253	176.848	PRELP
gene15633	223.314	1.92632	0.441837	4.35979	1.3e-05	0.00025266	491.36	502.928	321.573	55.3718	141.252	208.042	77.4642	135.808	76.0282	ETNK2
gene15655	110.594	1.43391	0.314806	4.55491	5.24e-06	0.000117064	189.753	163.313	219.011	74.1004	100.278	39.4185	70.422	72.1106	66.9379	KLHDC8A
gene15690	664.558	1.30386	0.401354	3.24864	0.00115958	0.00901566	841.903	1107	1355.73	666.904	312.694	199.283	538.225	570.875	388.405	C12H1orf116
gene15694	28.4789	-4.36323	0.750648	-5.81262	6.15e-09	3.96e-07	0	0.927912	5.34174	24.4287	42.052	56.9379	27.1628	56.4866	42.9725	C4BPA
gene15704	1697.17	-1.89112	0.5176	-3.65363	0.000258559	0.00275861	913.809	573.45	326.914	1179.91	2280.51	4657.95	1160.96	2728.18	1452.8	KCNT2
gene15714	18.3337	1.58658	0.493125	3.2174	0.00129358	0.0098043	35.9531	27.8374	35.2555	13.8429	17.2521	13.1395	3.01809	9.61474	9.09033	LOC101117007
gene15735	127.147	-3.59255	0.583253	-6.15951	7.3e-10	6.65e-08	5.99219	12.9908	26.7087	206.83	174.678	72.2673	134.808	376.177	133.876	RGS1
gene15741	38.804	-3.11123	0.820135	-3.79356	0.000148505	0.00178427	3.99479	14.8466	0	18.7287	51.7563	94.1665	75.4522	72.1106	18.1807	BRINP3
gene15756	73.7016	-2.27313	0.552996	-4.11058	3.95e-05	0.000621318	20.9727	33.4048	7.47843	49.6717	175.756	114.971	49.2954	111.771	99.9936	SPATA17
gene15772	2734.36	-2.28358	0.438503	-5.20767	1.91e-07	7.21e-06	813.939	787.797	690.152	4482.67	4293.62	1053.35	3196.15	4024.97	5266.61	MARK1
gene15775	1357.78	1.25057	0.312061	4.00745	6.14e-05	0.000886847	2275.03	1752.83	2611.04	641.661	882.014	652.595	1260.55	1216.27	928.04	LOC101123395
gene15817	998.041	1.20473	0.334914	3.59715	0.000321722	0.00331196	2359.92	1013.28	1435.86	668.533	748.31	965.754	692.148	596.114	502.447	EPHX1
gene15830	1231.42	1.49155	0.202634	7.36082	1.83e-13	4.92e-11	2072.3	2110.07	2293.74	715.761	934.848	858.448	784.703	626.16	686.733	PARP1
gene15856	187.349	-1.01601	0.309831	-3.27924	0.00104087	0.00832445	126.835	112.277	95.0829	142.501	239.373	197.093	217.302	225.946	329.731	EFCAB2
gene15859	2423.28	-1.32077	0.308718	-4.27824	1.88e-05	0.000341918	1539.99	1384.44	712.588	2608.99	2656.82	3964.85	2748.47	2670.5	3522.92	LOC101117005
gene15886	766.286	-2.84306	0.508585	-5.59013	2.27e-08	1.17e-06	193.747	176.303	79.0577	1434.78	1826.57	326.298	771.624	1121.32	966.88	RGS7
gene15899	1759.02	-1.53252	0.471864	-3.24779	0.00116305	0.00903477	877.856	833.265	621.778	2404.6	2310.7	558.429	2122.72	3599.52	2502.32	NME7
gene159	641.594	2.65835	0.27058	9.82464	8.82e-23	1.31e-19	1303.3	1280.52	1800.17	184.844	300.834	279.214	226.357	224.745	174.369	COL8A2
gene15907	328.72	-2.02824	0.527253	-3.8468	0.000119671	0.00149868	90.8815	131.763	100.425	236.144	627.545	292.354	257.543	236.763	985.061	SELP
gene15919	90.8768	-2.19842	0.581142	-3.78294	0.000154989	0.00183817	41.9453	29.6932	8.54678	145.758	171.443	32.8488	139.838	161.047	86.7713	MROH9
gene15920	879.109	-2.17411	0.326376	-6.66136	2.71e-11	3.71e-09	168.78	225.483	395.289	1083.01	1301.46	1488.05	1021.12	894.171	1334.63	FMO3
gene15921	65.4923	-2.10162	0.440847	-4.76723	1.87e-06	4.86e-05	30.9596	17.6303	12.8202	110.744	89.4953	45.9883	95.5728	122.588	63.6323	LOC101104591
gene15924	879.595	-1.51411	0.369284	-4.10013	4.13e-05	0.000643838	374.512	535.405	269.224	1180.72	1098.74	512.441	1298.78	1236.7	1409.83	FMO4
gene15951	64.667	1.72679	0.455353	3.79221	0.000149312	0.00179155	83.8906	174.447	103.63	21.1716	62.5389	48.1782	24.1447	40.8627	23.139	TNFRSF8
gene15953	1352.34	1.27555	0.241321	5.28569	1.25e-07	5.04e-06	2224.1	1996.87	2444.38	1032.52	1142.95	891.296	1007.03	665.821	766.067	MFN2
gene15997	3534.98	1.58036	0.259907	6.08049	1.2e-09	1.01e-07	5985.2	5131.35	7948.5	2202.66	1921.45	2651.99	2456.72	1544.37	1972.6	CLSTN1
gene16028	2712.5	-1.20997	0.339518	-3.56381	0.000365515	0.00368169	1687.8	1707.36	943.351	3499.82	3502.18	1703.76	3522.11	3948.05	3898.1	CAMTA1
gene16033	357.082	1.44896	0.300698	4.81864	1.45e-06	3.91e-05	533.305	627.268	695.494	274.416	156.347	210.232	282.694	153.836	280.147	KLHL21
gene16043	663.297	1.09329	0.253565	4.31169	1.62e-05	0.000301576	929.788	1135.76	1016	636.775	474.433	440.173	558.346	436.269	342.127	GPR153
gene16046	907.282	1.56289	0.369832	4.22594	2.38e-05	0.000408311	1442.12	1463.32	1963.62	563.489	534.815	981.083	510.057	366.562	340.474	ICMT
gene16049	85.8682	1.76181	0.39381	4.47376	7.69e-06	0.000160374	203.734	133.619	148.5	46.4146	26.9564	49.2731	80.4823	54.0829	29.7502	CHD5
gene16058	282.015	1.10794	0.240455	4.6077	4.07e-06	9.4e-05	430.439	407.353	478.62	168.558	196.243	279.214	188.127	173.065	216.515	LRRC47
gene16065	1274.68	1.48774	0.350268	4.24744	2.16e-05	0.00037905	1880.55	3372.96	1443.34	1031.71	758.014	932.905	841.04	495.159	716.483	MEGF6
gene16067	165.349	-1.27912	0.349175	-3.66327	0.000249012	0.00269133	80.8946	113.205	59.8275	185.658	267.408	143.44	292.754	159.845	185.112	PRDM16
gene16078	247.882	1.65505	0.338274	4.89264	9.95e-07	2.89e-05	350.543	601.287	413.45	214.973	102.434	97.4513	140.844	143.019	166.931	PLCH2
gene16083	1424.35	1.429	0.241647	5.9136	3.35e-09	2.36e-07	2155.19	2510	2691.17	903.863	908.97	1058.83	974.842	597.316	1018.94	SKI
gene16099	446.871	1.02017	0.272497	3.74379	0.000181264	0.0020767	706.08	786.869	532.037	375.388	291.129	446.743	352.11	246.378	285.106	MIB2
gene16100	83.5899	1.39194	0.429867	3.23808	0.00120337	0.00929106	154.798	102.07	169.867	42.3431	60.3824	106.211	45.2713	30.0461	41.3197	C12H1orf233
gene16113	526.056	1.82563	0.270262	6.75502	1.43e-11	2.1e-09	941.772	1108.85	976.47	315.945	284.66	186.143	394.363	266.809	259.488	DVL1
gene16119	33.6517	1.79641	0.519832	3.45575	0.000548769	0.00504924	72.905	56.6026	63.0325	20.3573	3.23477	16.4244	33.199	15.624	21.4862	SCNN1D
gene16122	176.784	1.23067	0.360309	3.41558	0.000636454	0.00565674	252.671	258.887	347.213	122.144	126.156	215.707	90.5426	90.1382	87.5977	B3GALT6
gene16132	1953.94	1.49514	0.272155	5.49371	3.94e-08	1.87e-06	3650.24	3342.34	3294.78	1461.65	1020.03	1697.19	1204.22	847.299	1067.7	AGRN
gene16139	637.844	1.89377	0.516362	3.66753	0.000244907	0.00265672	1520.02	1255.46	956.171	277.673	304.068	838.738	219.314	165.854	203.293	SAMD11
gene16147	2857.54	1.23947	0.219339	5.65091	1.6e-08	8.83e-07	4787.76	4477.18	4660.13	2322.36	1658.36	1792.45	2286.7	1537.16	2195.73	PLEKHM2
gene16154	29.6316	-2.80655	0.62042	-4.52363	6.08e-06	0.000132127	9.98698	5.56747	2.13669	16.2858	32.3477	31.7538	70.422	44.4682	53.7156	CTRC
gene16155	2427.02	1.33463	0.318391	4.19179	2.77e-05	0.000463182	4145.6	3286.66	4749.87	1392.44	1546.22	2683.74	1561.36	1284.77	1192.49	EFHD2
gene16158	49.4127	1.32778	0.376486	3.52677	0.000420663	0.00408427	44.9414	110.422	91.8779	23.6144	26.9564	35.0387	36.217	38.459	37.1877	LOC105616540
gene16198	188.961	-1.28261	0.236332	-5.42718	5.73e-08	2.59e-06	117.846	90.0075	82.2628	239.401	211.338	228.846	231.387	210.323	289.238	SERPINC1
gene16201	2555.2	-1.79668	0.541726	-3.31659	0.000911225	0.0074984	957.752	1309.28	626.052	3569.04	4013.27	570.474	3571.4	5041.73	3337.8	RABGAP1L
gene16209	1433.02	1.33431	0.21059	6.33606	2.36e-10	2.51e-08	1968.43	2647.33	2575.79	869.662	1178.53	924.145	872.227	1013.15	847.88	KIAA0040
gene16216	209.211	-1.94234	0.587121	-3.30825	0.000938811	0.00767914	97.8724	105.782	12.8202	204.387	507.859	235.416	143.862	311.277	263.62	PAPPA2
gene16241	102.917	4.11553	0.886469	4.64261	3.44e-06	8.11e-05	248.676	196.717	385.673	62.7004	4.31303	4.37984	2.01206	16.8258	4.95836	NPHS2
gene16244	8.71623	-2.89145	0.82024	-3.52513	0.000423282	0.00410297	2.99609	1.85582	0	12.2144	16.1738	16.4244	8.04823	10.8166	9.91672	LOC105608227
gene16251	1582.4	1.25804	0.281676	4.46626	7.96e-06	0.000165131	3043.03	1719.42	2993.51	1034.15	841.04	1310.67	1329.97	1022.77	947.047	QSOX1
gene16260	622.167	1.3078	0.394296	3.31681	0.000910506	0.0074984	1077.6	847.184	1171.98	314.316	418.364	824.504	347.08	336.516	261.967	IER5
gene16284	934.213	1.01725	0.252997	4.02079	5.8e-05	0.000848436	1428.14	1225.77	1575.81	815.105	505.702	580.328	900.396	700.674	675.99	LAMC2
gene16291	159.858	-2.48626	0.67045	-3.70834	0.000208619	0.0023388	31.9583	46.3956	39.5289	219.044	476.589	38.3236	175.049	69.7069	342.127	COLGALT2
gene16314	87.2651	-1.41771	0.3659	-3.8746	0.000106802	0.00137463	38.9492	55.6747	28.8454	67.5861	106.747	122.635	87.5245	126.194	151.23	PRG4
gene16364	618.517	-1.13221	0.21765	-5.20198	1.97e-07	7.36e-06	348.546	407.353	277.77	850.934	853.979	652.595	676.051	712.693	786.727	TRAF5
gene16441	3149.24	1.16554	0.353552	3.29667	0.000978398	0.00792989	4092.67	5228.78	5663.31	3038.93	1654.05	1366.51	3061.35	1531.15	2706.44	PKP1
gene1645	16.2494	-2.15432	0.572695	-3.76172	0.000168748	0.00195603	6.99089	5.56747	2.13669	17.1001	17.2521	15.3294	25.1507	22.835	33.8821	ADCY10
gene16463	659.965	1.86191	0.416157	4.47406	7.67e-06	0.000160374	1552.98	991.938	1286.29	348.516	250.156	728.148	275.652	268.011	238.001	TNNT2
gene16482	5012.99	-2.07969	0.581083	-3.57899	0.000344931	0.00351221	1921.5	1813.14	1037.37	6149.52	9240.66	843.118	6754.48	8855.18	8501.94	PLCB1
gene16484	1248.31	-1.71412	0.467835	-3.66395	0.000248358	0.00268729	451.412	656.034	378.195	1636.72	1506.32	439.078	2199.18	1606.86	2361.01	PLCB4
gene16489	32.5899	-2.00019	0.560111	-3.57106	0.00035554	0.00360165	5.99219	14.8466	11.7518	51.3003	25.8782	37.2286	17.1025	56.4866	72.7226	ANKEF1
gene16492	281.668	-2.07222	0.560199	-3.69908	0.000216379	0.00241058	73.9037	63.098	132.475	280.93	624.311	111.686	186.115	652.601	409.891	SNAP25
gene16500	2550.99	1.23688	0.261052	4.73807	2.16e-06	5.5e-05	3023.06	3999.3	5397.29	1800.4	1718.74	1380.74	1970.81	2111.64	1556.93	BTBD3
gene16510	556.969	-1.16072	0.302046	-3.84286	0.00012161	0.00151974	380.504	345.183	190.166	632.704	577.946	855.163	526.153	695.867	809.039	NDUFAF5
gene16513	2443.62	-1.83626	0.566913	-3.23906	0.00119925	0.00926798	1130.53	1100.5	470.073	3514.48	3530.21	488.352	4157.92	4256.93	3343.59	MACROD2
gene16520	1023.66	-1.8131	0.363558	-4.9871	6.13e-07	1.92e-05	538.298	409.209	199.781	1103.36	1370.46	885.822	1431.58	1820.79	1453.63	SNRPB2
gene16530	95.5494	-1.60938	0.345478	-4.65841	3.19e-06	7.6e-05	26.9649	41.756	52.349	89.572	116.452	98.5463	121.73	177.873	134.702	PRKCQ
gene16534	729.856	1.09371	0.318082	3.43846	0.00058503	0.00530609	1252.37	1008.64	1129.24	517.889	731.058	615.367	466.797	569.674	277.668	LOC101114294
gene16537	23.5799	-1.91674	0.590787	-3.24439	0.00117703	0.00912341	4.99349	10.207	9.61513	13.0286	31.2694	18.6143	26.1568	39.6608	58.6739	ITIH2
gene16549	4136.39	-2.43733	0.51506	-4.73212	2.22e-06	5.64e-05	860.878	1461.46	823.696	6109.62	6605.4	1111.38	7390.29	5225.61	7639.18	CELF2
gene16555	1171.85	1.00742	0.236899	4.25253	2.11e-05	0.000373848	1655.84	1602.5	2027.72	785.79	852.901	1149.71	861.161	948.254	662.768	ECHDC3
gene16579	492.538	-1.18078	0.367371	-3.21414	0.00130835	0.00988665	291.62	313.634	195.508	516.26	471.198	1112.48	483.9	461.508	586.739	LOC101109989
gene16586	694.383	-1.26162	0.273888	-4.60634	4.1e-06	9.44e-05	362.527	324.769	391.015	684.004	1174.22	886.917	586.515	949.456	890.026	CREM
gene16598	73.6405	-2.29026	0.526029	-4.35387	1.34e-05	0.000257514	22.9701	22.2699	16.0252	56.186	86.2605	101.831	47.2834	222.341	87.5977	MALRD1
gene16604	642.181	-2.32636	0.442293	-5.25977	1.44e-07	5.67e-06	167.781	289.509	66.2375	869.662	816.24	521.2	820.92	1180.21	1047.87	C13H10orf113
gene16632	535.439	-1.42373	0.319985	-4.44937	8.61e-06	0.000176809	271.646	266.311	219.011	646.547	855.057	354.767	594.563	776.391	834.657	PRTFDC1
gene16640	17.7118	3.22959	0.725916	4.44898	8.63e-06	0.00017692	23.9688	51.0352	56.6224	3.25716	6.46954	0	11.0663	1.20184	5.78475	FZD8
gene16652	1791.39	-1.27622	0.39275	-3.24945	0.00115629	0.00900591	758.012	1301.86	698.699	2588.63	2889.73	920.86	1965.78	2563.53	2435.38	FRMD4A
gene16675	67.6528	-2.02698	0.566476	-3.57824	0.00034592	0.00352025	12.9831	26.9094	26.7087	52.9289	63.6171	33.9437	90.5426	104.56	196.682	CUBN
gene16681	27.004	-2.28977	0.475191	-4.81863	1.45e-06	3.91e-05	3.99479	13.9187	4.27339	32.5716	34.5042	42.7034	32.1929	40.8627	38.0141	TMEM236
gene16686	1565.16	-1.54312	0.340213	-4.53575	5.74e-06	0.000125684	919.801	699.646	443.364	2161.13	2224.44	1078.53	2264.57	1915.74	2379.19	CACNB2
gene16695	1922.15	-2.22383	0.549612	-4.04617	5.21e-05	0.000778859	734.043	518.703	419.861	2638.3	2698.88	388.71	2906.42	3557.46	3436.97	ZNF438
gene16728	29.2896	-2.77626	0.560737	-4.95109	7.38e-07	2.24e-05	3.99479	7.4233	6.41008	36.6431	31.2694	58.0328	21.1266	67.3032	31.403	PCSK2
gene16765	1165.63	-1.92087	0.590381	-3.25361	0.00113951	0.0089064	381.503	563.243	278.839	1909.51	1569.94	178.478	2049.28	1954.2	1605.68	RALGAPA2
gene16830	1915.13	-2.55764	0.66256	-3.86023	0.000113279	0.00143277	804.951	371.165	173.072	2349.23	4278.52	340.532	2357.13	2288.31	4273.28	LOC106990122
gene16832	487.076	-1.18979	0.312634	-3.8057	0.000141403	0.00171691	193.747	331.265	262.813	590.361	508.937	644.931	869.209	584.096	398.322	LOC101109111
gene16874	2151.57	-1.66863	0.331709	-5.0304	4.89e-07	1.58e-05	826.922	1165.46	638.872	2271.06	3197.03	1566.89	2990.92	3383.19	3323.75	GPCPD1
gene16894	289.452	-1.727	0.30389	-5.68297	1.32e-08	7.56e-07	99.8698	129.908	112.176	447.046	297.599	236.511	441.647	359.351	480.961	ADRA1D
gene16897	992.278	-2.05523	0.568763	-3.6135	0.00030209	0.00314948	327.573	402.714	228.626	1459.21	1297.14	185.048	1248.48	2100.82	1680.88	RNF24
gene16919	212.494	-1.47644	0.430685	-3.42811	0.000607789	0.00546487	116.848	104.854	69.4426	277.673	321.32	391.995	358.146	135.808	136.355	SLC4A11
gene16922	627.084	1.43676	0.259034	5.5466	2.91e-08	1.44e-06	1115.55	884.3	1245.69	311.873	386.016	533.245	461.767	329.305	376.009	LOC101122805
gene16933	14.1865	-4.41419	1.048	-4.212	2.53e-05	0.000429729	0	2.78374	0	13.0286	39.8955	12.0445	12.0723	15.624	32.2293	TMEM239
gene16975	193.716	2.93286	0.385251	7.61284	2.68e-14	8.66e-12	288.624	602.215	491.44	82.2433	51.7563	31.7538	85.5125	52.8811	57.0212	ZNF512B
gene16977	1065.5	1.24587	0.366223	3.40193	0.000669108	0.00587065	1679.81	1575.59	1946.53	635.147	715.962	1393.88	571.424	548.04	523.107	DNAJC5
gene16979	29.1839	2.80772	0.408688	6.87008	6.42e-12	1.02e-09	58.9232	78.8725	66.2375	5.70003	11.8608	6.56975	8.04823	13.2203	13.2223	ABHD16B
gene16980	77.3643	-1.06253	0.320644	-3.31374	0.000920559	0.00756119	38.9492	63.098	32.0504	86.3148	117.53	74.4572	107.645	85.3309	90.9033	ZBTB46
gene16989	168.418	2.11732	0.381597	5.54858	2.88e-08	1.43e-06	330.569	433.335	274.565	129.472	44.2085	74.4572	98.5908	52.8811	77.681	SRMS
gene17001	1515.25	1.11677	0.342398	3.2616	0.00110785	0.00873584	2355.93	2003.36	2734.97	1101.74	1023.27	1905.23	968.806	767.978	775.984	GID8
gene17014	2570.35	1.35083	0.382699	3.52976	0.00041594	0.00405616	4146.59	4580.17	4239.2	1715.71	1169.91	3133.77	1860.15	995.126	1292.48	LAMA5
gene17022	366.351	1.37481	0.295796	4.64783	3.35e-06	7.96e-05	533.305	696.862	632.462	298.03	199.477	170.814	306.839	174.267	285.106	LSM14B
gene17024	1023.66	-2.37827	0.380156	-6.25605	3.95e-10	3.94e-08	267.651	288.581	252.13	1456.77	1271.26	701.869	1299.79	1160.98	2513.89	CDH4
gene17036	49.7421	-1.34719	0.375827	-3.58459	0.000337611	0.0034555	23.9688	25.9815	23.5036	43.1574	54.9911	84.3118	86.5185	43.2663	61.9795	TUBB1
gene1704	28620.6	2.58043	0.354017	7.289	3.12e-13	7.81e-11	77605.8	48077.9	67352.9	15123.8	6800.56	11982.1	9858.08	14144.5	6639.25	LOC101104027
gene17048	351.889	-1.14305	0.331441	-3.44873	0.00056322	0.00514753	247.677	218.059	118.587	460.074	331.025	617.557	452.713	385.792	335.516	ANKRD60
gene1707	20885.9	1.97757	0.392479	5.03866	4.69e-07	1.52e-05	32541.6	37607.3	54514.6	9501.14	10470.9	18525.6	9386.25	10351.5	5074.06	LOC101106046
gene17079	13.73	-2.11754	0.648244	-3.26658	0.00108855	0.00860276	3.99479	6.49538	2.13669	9.77149	14.0173	12.0445	20.1206	25.2387	29.7502	TMEM74B
gene1708	64.4821	-3.79559	0.658034	-5.76807	8.02e-09	4.97e-07	2.99609	15.7745	1.06835	101.786	77.6345	56.9379	153.922	118.982	51.2364	LOC101115597
gene17081	45.0132	-1.53149	0.386777	-3.95961	7.51e-05	0.00102943	19.974	19.4862	20.2986	62.7004	28.0347	59.1278	70.422	69.7069	55.3684	RSPO4
gene17083	13.0925	-2.27037	0.651701	-3.48376	0.00049443	0.00465787	3.99479	2.78374	4.27339	9.77149	22.6434	10.9496	26.1568	24.0369	13.2223	LOC101121190
gene1709	36.5692	-7.25811	1.53524	-4.72766	2.27e-06	5.76e-05	0	0	1.06835	75.729	7.5478	2.18992	103.621	114.175	24.7918	LOC101115849
gene1711	58.796	-3.73581	1.11178	-3.3602	0.000778869	0.00659573	0	7.4233	11.7518	116.444	127.234	229.941	8.04823	6.00922	22.3126	LOC101116626
gene1713	5250.81	2.49274	0.54381	4.58385	4.56e-06	0.000104193	12253	8235.22	14378.9	1385.92	1768.34	5548.16	1128.76	1234.29	1324.71	LOC101106558
gene1714	3794.76	1.23287	0.257624	4.78553	1.71e-06	4.51e-05	4515.11	6159.48	7777.57	2572.34	2691.33	2286.27	2101.59	2711.36	3337.8	LOC101116882
gene17158	56.3104	-1.68351	0.424656	-3.96442	7.36e-05	0.0010164	16.9779	36.1886	14.9569	118.886	62.5389	61.3177	59.3557	58.8903	77.681	LOC101116754
gene17160	1795.54	-1.52483	0.285209	-5.34637	8.97e-08	3.77e-06	856.883	967.812	567.292	2676.57	1616.31	1889.9	2194.15	2712.56	2678.34	CDK5RAP1
gene17168	441.665	1.01182	0.25085	4.03355	5.49e-05	0.000813707	658.142	629.124	708.314	350.145	269.564	396.375	422.532	292.048	248.744	E2F1
gene1717	44.7591	-1.91175	0.446717	-4.27956	1.87e-05	0.000341063	8.98828	25.0536	12.8202	36.6431	74.3997	65.6975	61.3678	75.7161	42.1461	GRIK1
gene17180	9.76977	4.35898	0.811827	5.36936	7.9e-08	3.4e-06	14.9805	27.8374	37.3922	1.62858	3.23477	0	0	1.20184	1.65279	AHCY
gene17190	1499.9	1.08238	0.25901	4.1789	2.93e-05	0.000487506	2929.18	1648.9	2364.25	1111.51	959.648	1424.54	977.86	1004.74	1078.44	ACSS2
gene17198	1113.3	1.89805	0.478672	3.96524	7.33e-05	0.0010164	2200.13	1886.45	2433.7	583.032	545.598	1324.9	409.454	365.36	271.057	FAM83C
gene17256	260.941	-6.19052	1.09089	-5.67477	1.39e-08	7.85e-07	5.99219	4.63956	5.34174	48.0431	462.572	1397.17	353.116	9.61474	61.9795	LOC105616741
gene17266	552.287	1.42928	0.412742	3.4629	0.000534397	0.00495293	1027.66	798.004	1026.68	437.274	321.32	123.73	424.544	517.994	293.37	FAM83D
gene17272	1927.07	1.43251	0.404495	3.54146	0.000397913	0.00393218	2863.27	3330.28	3768.06	968.191	1046.99	2592.86	955.728	926.621	891.679	MAFB
gene17279	718.408	1.61236	0.312435	5.16061	2.46e-07	8.79e-06	1249.37	952.038	1708.29	538.246	293.286	496.016	493.96	308.874	425.593	LPIN3
gene17282	295.396	-2.24396	0.38491	-5.82984	5.55e-09	3.65e-07	66.9128	106.71	80.1261	355.031	425.911	194.903	623.738	331.709	473.523	PTPRT
gene173	233.29	-1.51025	0.445867	-3.38722	0.00070604	0.0060893	110.855	152.178	50.2123	220.673	369.842	154.389	445.671	237.965	357.828	GRIK3
gene17300	1875.51	1.60141	0.397051	4.03325	5.5e-05	0.000813837	4659.93	1563.53	3950.75	1166.88	668.519	920.86	1572.42	1185.02	1191.66	FITM2
gene17304	1478.95	1.49598	0.369514	4.0485	5.15e-05	0.000772946	1968.43	2084.09	3736.01	960.863	1012.48	431.414	1225.34	924.217	967.707	SERINC3
gene17316	288.36	-2.96516	0.574146	-5.16447	2.41e-07	8.65e-06	56.9258	12.9908	86.5361	304.545	513.25	710.628	373.237	158.643	378.488	PI3
gene17318	39.1175	-1.68231	0.478835	-3.51334	0.000442516	0.00425919	17.9766	9.27912	20.2986	24.4287	37.739	81.027	62.3738	46.8719	52.0628	LOC101108152
gene1732	2403.43	-1.67461	0.475142	-3.52444	0.000424386	0.00411143	906.818	1087.51	934.804	2748.23	5410.69	861.733	2358.13	3410.83	3912.15	CYYR1
gene17322	171.616	1.08394	0.299648	3.61739	0.000297585	0.00311586	321.581	227.338	245.72	105.043	163.895	96.3564	89.5366	143.019	152.056	LOC106990174
gene17361	42.6379	1.33046	0.290651	4.57753	4.7e-06	0.000106433	67.9115	74.233	71.5793	33.3859	23.7216	33.9437	26.1568	28.8442	23.9654	ZSWIM1
gene17372	18.6672	-2.4903	0.671655	-3.70772	0.000209137	0.00234313	1.9974	8.35121	3.20504	11.4001	38.8172	39.4185	25.1507	13.2203	26.4446	CDH22
gene17412	409.213	1.8859	0.397205	4.74794	2.06e-06	5.29e-05	971.733	549.324	868.566	147.387	273.877	98.5463	311.869	234.359	227.258	CEBPB
gene17423	14.3594	-2.17184	0.598482	-3.62892	0.000284611	0.00300483	3.99479	5.56747	3.20504	19.543	16.1738	32.8488	17.1025	19.2295	11.5695	KCNG1
gene17433	3741.03	-2.04636	0.481035	-4.25407	2.1e-05	0.000372111	1404.17	1344.54	886.728	6238.28	4784.22	1140.95	6818.86	5862.59	5188.92	TSHZ2
gene17441	513.239	-1.18672	0.358982	-3.3058	0.000947048	0.00773226	345.55	310.851	175.209	736.933	585.493	1007.36	457.743	524.004	476.003	PFDN4
gene17481	224.604	1.57875	0.382213	4.13055	3.62e-05	0.00058107	639.167	302.499	269.224	187.287	99.1996	165.339	95.5728	146.625	116.521	LDHD
gene1749	257.014	-2.7885	0.445115	-6.26468	3.74e-10	3.75e-08	37.9505	75.1609	42.7339	370.502	410.816	147.819	357.14	592.509	278.495	NCAM2
gene17494	291.413	-1.56979	0.470477	-3.33659	0.000848136	0.00706435	99.8698	101.142	177.346	208.458	277.112	280.309	574.443	224.745	679.295	TMEM231
gene17498	542.675	1.00901	0.294687	3.42401	0.000617045	0.00552571	798.959	740.474	910.232	429.945	547.754	231.036	423.538	443.48	358.655	TERF2IP
gene17504	121.397	1.97798	0.517933	3.81899	0.000133999	0.00164163	134.824	254.248	335.461	36.6431	56.0693	18.6143	103.621	85.3309	67.7643	MON1B
gene17511	148.148	-1.27085	0.27602	-4.60418	4.14e-06	9.51e-05	77.8985	67.7376	83.3311	211.716	161.738	251.841	164.989	169.46	144.619	NUDT7
gene17512	124.43	1.9023	0.39707	4.79085	1.66e-06	4.42e-05	240.686	206.924	282.044	62.7004	95.9648	82.1219	26.1568	48.0737	75.2018	VAT1L
gene17514	3749.6	-2.12974	0.497756	-4.27869	1.88e-05	0.000341698	1428.14	1363.1	668.785	5066.52	4884.5	1198.98	5546.24	7259.13	6331	WWOX
gene1752	8.77585	-5.17771	1.41579	-3.65713	0.000255058	0.0027318	0	0.927912	0	8.9572	8.62605	35.0387	4.02412	15.624	5.78475	LOC101120465
gene1755	5.60636	-4.51904	1.34498	-3.35994	0.000779604	0.00659876	0.998698	0	0	3.25716	8.62605	6.56975	7.0422	13.2203	10.7431	TMPRSS15
gene17554	51.7412	-1.70037	0.522561	-3.25392	0.00113823	0.00890034	25.9662	22.2699	13.8885	114.815	45.2868	20.8042	81.4883	70.9087	70.2434	SLC38A8
gene17555	1546.15	1.16886	0.210377	5.55603	2.76e-08	1.38e-06	2150.2	2313.28	2901.63	1204.34	1039.44	1255.92	1125.75	865.327	1059.44	MBTPS1
gene17573	1428.91	1.11385	0.223368	4.9866	6.15e-07	1.92e-05	2114.24	2197.3	2371.73	941.32	969.353	1339.13	1184.1	889.364	853.664	ZDHHC7
gene17592	19.4658	-1.98489	0.567524	-3.49745	0.000469728	0.00446783	3.99479	11.1349	4.27339	17.9144	33.426	20.8042	42.2532	24.0369	17.3543	C14H16orf95
gene17601	845.028	2.20257	0.311791	7.06426	1.61e-12	3.15e-10	1161.49	2145.33	1995.67	501.603	299.755	267.17	448.689	379.782	405.759	SLC7A5
gene17641	2544.09	1.05109	0.295667	3.55498	0.000378001	0.00377534	5042.43	2700.22	3908.01	1581.35	1720.9	2723.16	1822.92	1864.06	1533.79	TCF25
gene17652	777.334	-1.25702	0.293079	-4.28902	1.79e-05	0.000328543	466.392	436.119	307.684	886.762	1058.85	567.189	1046.27	1091.27	1135.46	MYLK3
gene17654	1396.36	1.40873	0.196882	7.15517	8.36e-13	1.83e-10	2164.18	2149.97	2854.62	1074.86	820.553	843.118	913.474	873.74	872.672	GPT2
gene17685	1828.3	1.12602	0.315036	3.57425	0.000351232	0.00356411	2405.86	3271.82	2909.11	1791.44	913.283	1811.06	1329.97	986.713	1035.47	ADCY7
gene17719	356.417	1.15182	0.259234	4.44315	8.86e-06	0.000180739	687.104	402.714	598.275	233.701	314.851	231.036	286.718	234.359	218.994	IRX5
gene17735	935.693	4.3037	0.861843	4.99361	5.93e-07	1.87e-05	4491.15	856.463	2299.08	180.773	83.0258	421.559	21.1266	43.2663	24.7918	MT3
gene17762	760.511	1.24718	0.190225	6.55638	5.51e-11	6.61e-09	1164.48	1262.89	1287.36	515.446	495.998	654.785	463.779	475.93	523.933	CX3CL1
gene17771	7111.07	1.21698	0.212188	5.73538	9.73e-09	5.86e-07	11844.6	10568	11990.1	5504.6	4325.97	5832.85	5027.13	3723.31	5183.14	ADGRG1
gene17780	50.3369	2.00174	0.409004	4.89417	9.87e-07	2.87e-05	80.8946	79.8004	141.022	13.0286	38.8172	19.7093	30.1809	26.4405	23.139	ZNF319
gene17783	209.034	2.11653	0.321207	6.58932	4.42e-11	5.56e-09	458.402	329.409	499.987	111.558	116.452	65.6975	140.844	82.9272	76.0282	MMP15
gene17803	99.2467	-2.33274	0.651562	-3.58023	0.000343286	0.00349947	18.9753	38.0444	23.5036	43.9717	266.329	37.2286	244.465	129.799	90.9033	CDH8
gene17812	43.2088	-2.4635	0.496896	-4.95778	7.13e-07	2.18e-05	14.9805	13.9187	3.20504	43.1574	38.8172	50.3681	78.4703	62.4958	83.4657	LOC101103916
gene17819	98.2089	-1.75157	0.478744	-3.65869	0.000253511	0.00272398	49.9349	49.1793	14.9569	128.658	108.904	52.558	157.947	162.249	159.494	CCDC79
gene17833	166.428	1.57897	0.320258	4.93031	8.21e-07	2.47e-05	217.716	287.653	392.084	86.3148	138.017	79.932	120.723	72.1106	103.299	B3GNT9
gene17847	19.5509	-2.90685	0.90449	-3.2138	0.0013099	0.00988991	9.98698	0	1.06835	15.4715	12.9391	19.7093	32.1929	16.8258	67.7643	KCTD19
gene17848	150.154	-3.50169	0.780588	-4.48597	7.26e-06	0.00015272	31.9583	17.6303	7.47843	74.9147	259.86	18.6143	168.007	386.993	385.926	LRRC36
gene17850	941.479	-1.24266	0.312732	-3.97356	7.08e-05	0.000990852	535.302	662.529	279.907	1231.21	864.762	1159.56	1276.65	1081.66	1381.73	ZDHHC1
gene17880	54.317	1.54186	0.32046	4.81138	1.5e-06	4.03e-05	105.862	94.647	88.6728	18.7287	34.5042	42.7034	38.2291	32.4498	33.0557	DPEP2
gene17895	1432.7	1.24178	0.255612	4.85806	1.19e-06	3.33e-05	2453.8	2403.29	2129.22	1131.86	1089.04	1263.58	910.456	674.234	838.789	CDH3
gene17928	798.802	1.36895	0.300444	4.55644	5.2e-06	0.000116511	1449.11	1262.89	1339.71	564.303	529.424	800.415	498.99	348.534	395.842	DHX38
gene17930	425.69	-6.00785	1.36762	-4.39292	1.12e-05	0.000219939	5.99219	6.49538	17.0936	54.5575	98.1213	1613.97	47.2834	45.67	1942.02	LOC101102413
gene17936	854.721	1.00111	0.235914	4.24354	2.2e-05	0.00038418	1020.67	1194.22	1633.5	670.161	611.371	526.675	765.588	600.922	669.379	ATXN1L
gene17954	35.6129	-1.33907	0.38085	-3.51602	0.000438075	0.00422331	19.974	13.9187	19.2303	40.7145	35.5825	50.3681	34.205	42.0645	64.4587	HYDIN
gene17964	130.08	-1.81864	0.428473	-4.24447	2.19e-05	0.000382975	21.9714	67.7376	55.5541	138.429	191.93	108.401	125.754	216.332	244.612	ZNF536
gene1798	311.772	-3.12898	0.427358	-7.32169	2.45e-13	6.39e-11	42.944	58.4585	50.2123	377.831	381.703	178.478	463.779	758.363	494.183	CADM2
gene17982	998.483	-1.31247	0.304002	-4.3173	1.58e-05	0.000295043	521.32	660.673	323.709	1549.59	1040.52	907.721	1240.43	1263.14	1479.24	CEP89
gene17992	550.266	1.92467	0.375899	5.12018	3.05e-07	1.06e-05	1324.27	748.825	1169.84	201.944	210.26	217.897	411.466	442.278	225.605	CEBPA
gene18009	2293.59	-2.52586	0.74068	-3.4102	0.000649161	0.00574953	389.492	480.658	778.825	3099.19	7353.71	693.109	568.406	5867.4	1411.48	LOC106991568
gene18047	20428.3	1.78399	0.404932	4.40565	1.05e-05	0.000208793	56676.1	24491.3	35140.1	12096.3	7513.29	17463.5	11819.8	12663.8	5990.53	SBSN
gene18075	236.086	1.35623	0.288962	4.69345	2.69e-06	6.59e-05	449.414	297.86	445.501	158.787	121.843	194.903	196.176	145.423	114.869	APLP1
gene18108	293.172	-1.141	0.280421	-4.06887	4.72e-05	0.000720622	141.815	224.555	120.723	343.631	400.033	274.835	346.074	429.058	357.828	ZNF793
gene18127	412.103	-1.00713	0.200329	-5.02735	4.97e-07	1.6e-05	291.62	213.42	233.968	486.131	514.328	421.559	480.882	534.82	532.197	LOC101109901
gene18135	59.8084	-1.31308	0.302137	-4.34596	1.39e-05	0.000265068	34.9544	22.2699	33.1188	83.8719	76.5562	85.4068	62.3738	76.918	62.8059	LOC101109732
gene18140	6442.1	1.34352	0.268771	4.99876	5.77e-07	1.83e-05	13351.6	8051.49	11021.1	4689.5	3853.69	4961.26	4332.97	4813.38	2903.95	SPINT2
gene1816	7.51687	-3.44652	1.01429	-3.39795	0.000678927	0.00591254	0	1.85582	1.06835	5.70003	6.46954	10.9496	15.0904	10.8166	15.7015	LOC105616630
gene18173	622.528	1.24276	0.227815	5.45511	4.89e-08	2.28e-06	1113.55	1016.06	907.027	469.846	407.581	527.77	466.797	330.507	363.613	PAK4
gene18174	1118.15	1.63026	0.491528	3.31672	0.000910817	0.0074984	2408.86	1295.37	2409.12	700.29	417.285	1495.71	497.984	502.37	336.342	NCCRP1
gene18199	260.881	1.42768	0.234604	6.0855	1.16e-09	9.96e-08	359.531	421.272	566.224	166.115	155.269	155.484	202.212	159.845	161.973	DYRK1B
gene182	229.349	1.73239	0.491969	3.52135	0.000429355	0.00415051	459.401	417.56	411.314	135.172	117.53	298.924	92.5547	69.7069	61.9795	CDCA8
gene18201	1128.38	2.38349	0.487328	4.89094	1e-06	2.91e-05	1278.33	2475.67	3587.51	658.761	317.007	197.093	603.617	725.913	311.55	FCGBP
gene18218	77.001	1.51155	0.357794	4.22464	2.39e-05	0.000409819	161.789	157.745	87.6045	44.786	52.8346	30.6588	71.4281	45.67	40.4933	SPTBN4
gene18221	4657.61	2.03079	0.458785	4.42646	9.58e-06	0.000193226	9211.99	7945.71	10985.8	1715.71	2772.2	4204.64	2718.29	861.721	1502.38	LTBP4
gene18234	1276.68	2.98944	0.590633	5.06141	4.16e-07	1.38e-05	3478.47	2184.3	3515.93	529.289	930.535	166.434	360.158	175.469	149.577	CYP2A6
gene18253	2567.94	1.60932	0.311944	5.15899	2.48e-07	8.84e-06	3803.04	4687.81	5469.94	1512.95	1755.4	803.7	1951.7	1438.61	1688.32	HNRNPUL1
gene18259	775.835	-1.59066	0.375518	-4.23592	2.28e-05	0.000395891	304.603	443.542	245.72	695.404	712.728	1517.61	1304.82	659.812	1098.28	LOC101103343
gene18260	14.7081	-4.49049	1.31094	-3.42539	0.000613921	0.00550328	0	2.78374	0	42.3431	9.70431	0	21.1266	32.4498	23.9654	CXCL17
gene18263	391.232	1.34075	0.334119	4.01279	6e-05	0.000871284	513.331	816.563	637.803	267.902	176.834	361.336	334.002	167.056	246.265	MEGF8
gene18267	1210.16	1.60622	0.203902	7.87743	3.34e-15	1.38e-12	2023.36	2423.71	2127.08	768.69	747.232	729.243	805.829	532.416	733.837	CIC
gene18269	613.81	1.64267	0.310128	5.29674	1.18e-07	4.79e-06	1366.22	1016.06	985.016	233.701	411.894	396.375	481.888	246.378	386.752	ERF
gene18270	1198.62	1.14643	0.287805	3.98337	6.79e-05	0.00096142	2057.32	1700.86	1909.14	883.505	750.467	1310.67	858.143	598.518	718.962	GSK3A
gene18295	3853.59	2.1241	0.373387	5.68872	1.28e-08	7.38e-07	8572.83	6490.74	8711.3	2163.57	1990.46	2116.56	2624.73	1004.74	1007.37	LYPD3
gene18314	1486.84	3.10874	0.435495	7.13841	9.44e-13	1.97e-10	4019.76	3223.57	3619.56	506.489	296.521	182.858	705.226	567.27	260.314	LYPD5
gene18334	1421.87	2.40253	0.36107	6.65392	2.85e-11	3.84e-09	3416.55	2595.37	3272.35	443.788	666.363	1040.21	513.075	368.966	480.135	BCAM
gene18344	1316.18	1.44566	0.363727	3.97458	7.05e-05	0.000988939	2295.01	1977.38	2557.62	671.79	811.927	1497.9	912.468	550.444	571.038	CLPTM1
gene18365	407.349	2.26953	0.319897	7.09455	1.3e-12	2.59e-10	801.955	785.941	1004.25	227.187	162.817	112.781	266.598	141.817	162.8	LOC106991561
gene18370	313.843	-3.18572	0.975235	-3.26662	0.0010884	0.00860276	17.9766	21.342	107.903	41.5288	307.303	32.8488	638.828	1409.76	247.092	FOSB
gene18389	511.284	1.74	0.500772	3.47463	0.000511564	0.00479385	1056.62	871.309	949.761	174.258	300.834	692.014	237.423	173.065	146.272	IRF2BP1
gene18396	28.1022	-3.07921	0.730449	-4.2155	2.49e-05	0.000423926	5.99219	2.78374	5.34174	17.1001	45.2868	31.7538	25.1507	102.157	17.3543	LOC101120688
gene18401	831.444	1.7701	0.388754	4.55326	5.28e-06	0.000117691	1856.58	1291.65	1568.33	442.974	444.242	786.18	527.159	348.534	217.341	CCDC8
gene18475	226.195	2.36354	0.336121	7.03181	2.04e-12	3.81e-10	523.318	501.072	442.296	155.529	113.217	86.5017	80.4823	69.7069	63.6323	FUT1
gene18530	936.372	1.40943	0.233446	6.0375	1.57e-09	1.23e-07	1475.08	1664.67	1668.76	615.604	597.354	435.794	742.449	525.205	702.434	AP2A1
gene18536	304.582	1.16232	0.247517	4.69595	2.65e-06	6.54e-05	541.294	498.289	408.109	228.816	193.008	233.226	283.7	175.469	179.327	PNKP
gene18541	679.042	1.33081	0.219922	6.05127	1.44e-09	1.17e-07	1192.45	1089.37	1122.83	492.646	426.99	555.144	498.99	356.947	376.009	NUP62
gene18550	4843.09	1.94862	0.30034	6.48806	8.69e-11	9.9e-09	12196.1	7743.43	8772.2	2694.49	2138.18	3425.03	2908.43	1728.25	1981.69	MYH14
gene18551	63.9864	-1.62897	0.410348	-3.96974	7.2e-05	0.00100473	30.9596	37.1165	11.7518	100.158	77.6345	88.6917	107.645	64.8995	57.0212	KCNC3
gene18559	579.767	1.95206	0.32085	6.084	1.17e-09	1e-07	1193.44	930.696	1315.14	211.716	360.138	183.953	389.333	366.562	266.925	EMC10
gene18580	1486.77	1.76317	0.512313	3.44158	0.000578333	0.0052559	3490.45	2062.75	2866.38	1087.89	977.979	344.912	961.764	1326.83	261.967	KLK6
gene18581	8740.69	2.01543	0.600099	3.35851	0.000783652	0.00662671	22102.2	13727.5	16800.8	5936.18	2503.71	952.614	5399.36	9147.23	2096.56	KLK7
gene18583	672.786	2.47784	0.406546	6.09487	1.1e-09	9.53e-08	1456.1	1724.06	1275.61	442.974	153.112	176.288	344.062	320.892	161.973	KLK9
gene18584	10800.5	3.23512	0.301501	10.7301	7.35e-27	1.87e-23	28624.7	22811.8	28737.5	3056.85	2985.69	3669.21	3089.51	2725.78	1503.21	KLK10
gene18587	672.507	1.84363	0.404653	4.55608	5.21e-06	0.000116564	1081.59	1089.37	1715.77	367.245	287.894	209.137	668.003	390.599	242.96	KLK12
gene18599	80.4468	2.84925	0.375307	7.5918	3.15e-14	9.83e-12	210.725	141.043	214.738	27.6859	29.1129	10.9496	28.1688	38.459	23.139	IGLON5
gene18600	305.962	1.4	0.278654	5.02415	5.06e-07	1.62e-05	446.418	675.52	444.433	247.544	161.738	201.472	230.381	200.708	145.445	VSIG10L
gene1862	665.364	1.08943	0.1974	5.5189	3.41e-08	1.66e-06	942.771	948.326	1195.48	490.203	445.32	533.245	526.153	505.976	400.801	CPOX
gene1864	849.925	-1.66654	0.440651	-3.782	0.000155573	0.00183932	310.595	441.686	288.454	1170.95	1352.13	309.873	1120.72	1403.75	1251.16	ST3GAL6
gene18640	20.2263	-2.37017	0.732132	-3.23735	0.00120645	0.0093027	3.99479	5.56747	6.41008	8.14291	17.2521	55.8429	21.1266	50.4774	13.2223	LOC101106874
gene18644	503.692	-1.18285	0.355047	-3.33154	0.000863677	0.00718369	291.62	254.248	272.429	611.532	618.919	292.354	506.033	834.079	852.012	LOC105601988
gene18650	39.3444	-2.53275	0.514845	-4.91944	8.68e-07	2.59e-05	10.9857	4.63956	12.8202	76.5433	33.426	28.4689	54.3256	57.6885	75.2018	LOC101108681
gene18656	30.8817	-2.10139	0.652488	-3.22058	0.00127932	0.00972111	14.9805	5.56747	8.54678	47.2289	37.739	5.47479	55.3316	46.8719	56.1948	LOC105601991
gene18669	3.60165	-4.86953	1.40673	-3.46159	0.000536995	0.00496924	0	0	0	5.70003	3.23477	8.75967	5.03014	7.21106	2.47918	LOC101111313
gene18672	3.39065	5.79707	1.53324	3.78093	0.000156244	0.0018448	17.9766	1.85582	10.6835	0	0	0	0	0	0	LOC101111827
gene1869	422.446	-1.09425	0.213805	-5.11798	3.09e-07	1.07e-05	272.645	233.834	214.738	435.645	579.024	502.586	432.592	551.646	579.302	CMSS1
gene18707	1418.69	1.38672	0.336662	4.11904	3.8e-05	0.000602687	2920.19	2018.21	2295.88	756.476	848.588	1629.3	849.088	704.28	746.233	EPN1
gene18714	299.851	1.25862	0.175785	7.16002	8.07e-13	1.79e-10	526.314	466.74	476.483	197.873	186.538	213.517	224.344	215.13	191.723	FIZ1
gene18734	1088.5	1.43775	0.257684	5.57951	2.41e-08	1.23e-06	1742.73	2164.82	1728.59	749.147	544.52	891.296	791.745	503.572	680.122	PPP6R1
gene18744	53.2977	-1.95447	0.484746	-4.03194	5.53e-05	0.00081658	21.9714	25.0536	7.47843	59.4432	71.1649	130.3	63.3798	50.4774	50.41	LOC106990488
gene18791	35.8901	1.88589	0.45938	4.10529	4.04e-05	0.000633324	51.9323	112.277	44.8706	14.6572	25.8782	28.4689	18.1085	14.4221	12.3959	NLRP13
gene18825	33.9436	-3.49952	1.01538	-3.44652	0.000567859	0.00517927	4.99349	3.71165	4.27339	207.644	33.426	10.9496	18.1085	10.8166	11.5695	AURKC
gene18831	464.279	-1.20017	0.327745	-3.6619	0.00025035	0.00269929	240.686	321.058	184.824	670.975	600.589	300.019	666.997	629.766	563.6	LOC101113523
gene18841	57.7718	-1.99082	0.393251	-5.06246	4.14e-07	1.37e-05	17.9766	17.6303	22.4353	63.5147	93.8083	114.971	64.3859	78.1198	47.1044	LOC105602107
gene18852	141.307	-1.13996	0.304749	-3.74064	0.00018355	0.00209883	57.9245	100.214	76.921	216.601	190.851	159.864	201.206	144.221	123.959	LOC105602036
gene18870	134.422	-2.46194	0.322245	-7.63998	2.17e-14	7.28e-12	39.9479	37.1165	23.5036	261.387	148.799	167.529	178.067	152.634	200.814	C14H19orf18
gene18876	363.239	1.31804	0.299371	4.40269	1.07e-05	0.000211333	457.404	688.511	668.785	297.216	218.886	297.829	252.513	144.221	243.786	LOC101119415
gene18879	10.756	3.99867	0.65528	6.10223	1.05e-09	9.15e-08	27.9635	25.0536	33.1188	2.44287	2.15651	0	2.01206	2.40369	1.65279	RNF225
gene18882	40.7505	1.42076	0.388899	3.6533	0.000258893	0.00275956	73.9037	71.4492	65.1692	39.0859	12.9391	30.6588	18.1085	24.0369	31.403	LOC105602111
gene18891	119.121	1.16246	0.343514	3.38403	0.000714294	0.00614854	168.78	192.078	205.123	79.8005	97.0431	135.775	81.4883	51.6793	60.3267	LOC105602113
gene18894	6.33383	-5.68654	1.51357	-3.75703	0.00017194	0.00198608	0	0	0	6.51432	18.3304	3.28488	1.00603	20.4313	7.43754	LOC101115227
gene18925	1449.52	-1.77949	0.315513	-5.63999	1.7e-08	9.24e-07	621.19	502	535.242	1714.08	1554.85	1177.08	1859.14	2940.91	2141.19	LOC101117272
gene18957	615.353	-1.8588	0.540665	-3.43798	0.000586063	0.00531256	132.827	370.237	167.731	811.848	764.484	189.428	719.311	1163.38	1218.93	TRPC6
gene18997	111.314	-1.83145	0.452715	-4.04548	5.22e-05	0.000780216	37.9505	27.8374	57.6908	104.229	111.06	104.021	205.23	259.598	94.2089	GUCY1A2
gene19008	12082.1	2.40568	0.28854	8.33745	7.59e-17	3.96e-14	21881.5	22884.2	34176.4	3971.29	7358.02	5168.21	4736.38	4172.8	4389.8	C15H11orf65
gene19020	878.822	-2.32925	0.470623	-4.9493	7.45e-07	2.25e-05	220.712	316.418	178.414	954.349	1674.53	341.627	1084.5	1585.23	1553.62	ARHGAP20
gene19030	676.435	-2.18269	0.493118	-4.4263	9.59e-06	0.000193226	200.738	273.734	129.27	679.118	751.545	2082.61	620.72	465.113	885.067	LAYN
gene19057	2674.49	2.1703	0.655082	3.31302	0.000922935	0.0075702	6812.12	3990.02	5863.09	1460.84	1407.12	147.819	1808.84	2139.28	441.294	LOC101112509
gene19075	4749.88	-2.62278	0.600303	-4.3691	1.25e-05	0.000243464	1402.17	1172.88	634.598	7539.52	6224.78	982.178	6011.02	5384.26	13397.5	ZBTB16
gene19077	30.9845	-2.57202	0.711444	-3.6152	0.00030011	0.00313766	8.98828	8.35121	4.27339	25.243	21.5651	67.8874	32.1929	12.0184	98.3408	LOC101111049
gene19123	13.3019	2.30911	0.591531	3.90362	9.48e-05	0.00125259	15.9792	33.4048	36.3238	5.70003	5.39128	2.18992	10.0603	2.40369	8.26394	SCN2B
gene19124	643.739	-1.67985	0.356299	-4.71472	2.42e-06	6.05e-05	253.669	285.797	242.515	1047.99	608.137	1180.37	1026.15	712.693	436.336	JAML
gene19143	1533.52	1.28584	0.330024	3.8962	9.77e-05	0.0012806	2668.52	2437.62	2476.43	1139.19	1037.28	467.547	1349.08	1115.31	1110.67	BCL9L
gene19148	192.159	-1.25182	0.292639	-4.2777	1.89e-05	0.000342183	119.844	110.422	69.4426	228.816	250.156	321.918	177.061	231.956	219.821	RPS25
gene19159	678.717	1.05687	0.31445	3.36102	0.000776564	0.00659188	1110.55	837.904	1165.57	512.189	466.885	794.94	390.339	487.948	342.127	NLRX1
gene19164	406.283	1.52667	0.351256	4.34631	1.38e-05	0.000264934	758.012	626.341	773.484	224.744	255.547	447.838	214.284	193.497	162.8	RNF26
gene19173	12786.4	1.36688	0.345018	3.96178	7.44e-05	0.0010249	25888.3	17533.8	21393.7	8866	5526.06	14361.5	7945.62	7256.73	6306.21	TRIM29
gene1918	5719.48	-1.15231	0.339131	-3.39782	0.000679246	0.00591254	2581.63	3474.1	3397.34	7357.93	6681.96	3168.81	8209.2	8720.57	7883.79	CD47
gene1921	52.3586	-1.70128	0.496152	-3.42894	0.000605942	0.00545102	12.9831	24.1257	25.6403	36.6431	73.3214	30.6588	68.41	109.368	90.0769	HHLA2
gene19225	943.868	-2.24797	0.60495	-3.71596	0.000202437	0.00227812	314.59	291.364	202.986	1474.68	1048.07	143.44	1637.82	2188.56	1193.31	SOX6
gene19238	347.68	-1.98623	0.466044	-4.2619	2.03e-05	0.000362489	87.8854	148.466	114.313	261.387	478.746	295.639	376.255	355.746	1010.68	PDE3B
gene19265	508.627	-2.24733	0.651601	-3.44893	0.000562819	0.00514651	114.85	206.924	114.313	811.033	678.223	53.653	775.648	671.83	1151.17	LOC106991619
gene19266	487.489	-1.51797	0.303716	-4.99801	5.79e-07	1.83e-05	201.737	265.383	184.824	684.004	569.319	457.693	949.691	564.866	509.885	LOC101122548
gene19271	905.729	-1.35549	0.292694	-4.63109	3.64e-06	8.52e-05	349.544	600.359	382.468	1200.26	1244.31	966.849	1039.23	838.886	1529.65	MRVI1
gene19275	1141.27	-2.30374	0.526744	-4.37355	1.22e-05	0.000238813	345.55	327.553	271.36	1177.46	2345.21	3110.78	811.865	499.967	1381.73	ADM
gene1928	50.2406	-3.15188	0.463355	-6.8023	1.03e-11	1.56e-09	6.99089	6.49538	10.6835	63.5147	100.278	47.0832	62.3738	98.5511	56.1948	MORC1
gene193	532.2	1.46135	0.278725	5.243	1.58e-07	6.14e-06	1190.45	764.599	819.422	338.745	342.886	233.226	434.605	374.975	290.891	POU3F1
gene19362	826.802	1.31337	0.252404	5.20342	1.96e-07	7.35e-06	1195.44	1291.65	1636.71	602.575	558.537	675.59	556.334	366.562	557.816	TPP1
gene19366	146.08	-1.57979	0.30187	-5.23334	1.66e-07	6.4e-06	78.8972	67.7376	41.6655	186.473	147.721	181.763	188.127	169.46	252.876	DNHD1
gene19379	135.859	-1.86556	0.327034	-5.70448	1.17e-08	6.86e-07	51.9323	61.2422	34.1871	154.715	162.817	175.193	192.152	131.001	259.488	LOC101119417
gene1940	1058.57	-1.58672	0.388915	-4.07985	4.51e-05	0.000693927	360.53	486.226	512.807	1119.65	2274.04	840.928	773.636	1642.92	1516.43	PVRL3
gene19430	15.593	-2.18121	0.675436	-3.22933	0.0012408	0.00951087	6.99089	3.71165	3.20504	9.77149	18.3304	41.6084	23.1387	9.61474	23.9654	LOC101118897
gene19470	2629.76	-6.93173	1.29257	-5.36273	8.2e-08	3.5e-06	56.9258	27.8374	11.7518	3711.54	10776.1	290.164	6458.71	30.0461	2304.81	LOC101106199
gene1954	11.8767	-2.46597	0.713915	-3.45415	0.000552034	0.00507403	2.99609	4.63956	1.06835	8.9572	20.4869	8.75967	14.0844	25.2387	20.6598	SLC9C1
gene19562	57.6652	-2.09075	0.448232	-4.66443	3.09e-06	7.42e-05	13.9818	13.9187	26.7087	51.3003	111.06	49.2731	83.5004	110.57	58.6739	LOC101112671
gene19607	6036.49	1.05635	0.264676	3.99109	6.58e-05	0.000935883	10098.8	8440.29	9155.74	4926.46	3428.86	5935.77	5181.05	3345.93	3815.46	NUMA1
gene19616	1109.23	1.25242	0.214282	5.84472	5.07e-09	3.37e-07	1771.69	1955.11	1700.81	868.034	717.041	873.777	828.968	568.472	699.129	INPPL1
gene1962	83.3455	-2.11889	0.392422	-5.39951	6.68e-08	2.94e-06	12.9831	33.4048	30.9821	99.3434	119.686	87.5967	171.025	103.359	91.7297	LOC101114747
gene19627	129.535	1.1573	0.254998	4.53848	5.67e-06	0.000124722	194.746	187.438	231.831	84.6862	73.3214	99.6413	86.5185	124.992	82.6394	P2RY2
gene19629	867.599	1.11653	0.268458	4.15906	3.2e-05	0.000523977	1114.55	1705.5	1241.42	596.875	640.484	840.928	671.021	468.719	528.892	ARHGEF17
gene19703	35.7483	-1.90025	0.578613	-3.28414	0.00102293	0.00821579	13.9818	18.5582	5.34174	26.0573	35.5825	63.5076	50.3014	21.6332	86.7713	MYO7A
gene19704	38.4831	-1.77481	0.53449	-3.32056	0.000898368	0.00741321	13.9818	12.0629	18.1619	14.6572	56.0693	76.6471	49.2954	36.0553	69.4171	LOC101110537
gene19707	725.829	-1.46897	0.284704	-5.15964	2.47e-07	8.82e-06	318.585	308.067	372.853	876.177	1083.65	540.91	1158.95	1004.74	868.54	ANO3
gene19710	176.758	1.21381	0.374468	3.24142	0.00118936	0.00921095	260.66	167.952	426.271	170.187	143.408	75.5522	121.73	109.368	115.695	FIBIN
gene19726	399.097	-2.50221	0.435812	-5.74148	9.39e-09	5.73e-07	91.8802	115.989	83.3311	606.646	727.823	164.244	509.051	630.968	661.941	MPPED2
gene19728	59.9177	-1.50495	0.364803	-4.12539	3.7e-05	0.000589879	23.9688	35.2607	21.3669	63.5147	84.104	45.9883	80.4823	82.9272	101.646	LOC101111830
gene19729	1755.02	-1.2341	0.259315	-4.75908	1.94e-06	5.03e-05	1133.52	1029.05	605.753	2095.98	1826.57	2330.07	1978.86	2507.04	2288.28	DNAJC24
gene19735	119.678	-1.89072	0.339768	-5.56473	2.63e-08	1.33e-06	50.9336	50.1072	26.7087	171.815	196.243	96.3564	149.898	159.845	175.195	LOC105602333
gene19761	2475.76	1.00288	0.311761	3.21681	0.00129625	0.0098161	2390.88	3974.25	4787.26	2185.56	2229.83	1163.94	1941.64	1813.58	1794.93	CAPRIN1
gene1980	36.7202	-2.66001	0.646405	-4.11508	3.87e-05	0.00061149	3.99479	15.7745	4.27339	24.4287	51.7563	22.9941	56.3376	49.2756	101.646	DRD3
gene19815	604.654	1.18482	0.362519	3.2683	0.00108196	0.00857362	891.837	960.389	1042.71	439.717	516.485	663.545	417.502	216.332	293.37	TP53I11
gene19818	61.939	2.119	0.605161	3.50155	0.000462558	0.00442809	78.8972	171.664	131.407	42.3431	26.9564	3.28488	53.3195	26.4405	23.139	LOC105602425
gene19824	252.344	2.50212	0.280483	8.92076	4.63e-19	3.92e-16	498.35	487.154	692.289	74.9147	116.452	97.4513	72.4341	123.79	108.258	CHST1
gene19826	203.059	1.43365	0.360739	3.97421	7.06e-05	0.000988939	346.548	354.462	348.281	95.272	141.252	203.662	156.941	114.175	66.9379	SLC35C1
gene19828	159.715	1.32373	0.268578	4.92865	8.28e-07	2.49e-05	318.585	223.627	256.403	87.9434	103.513	129.205	136.82	93.7438	87.5977	MAPK8IP1
gene19841	1034.66	1.01096	0.297983	3.39266	0.000692184	0.00600345	1376.21	1571.88	1726.45	975.52	712.728	447.838	964.782	662.216	874.324	ARHGAP1
gene19847	955.874	1.47984	0.25217	5.86841	4.4e-09	2.99e-07	1835.61	1584.87	1589.7	682.375	518.641	827.789	590.539	504.774	468.565	ARFGAP2
gene19854	582.331	1.22027	0.371391	3.28568	0.00101737	0.00818527	718.064	1161.75	941.214	645.732	354.746	222.277	481.888	287.24	428.072	MADD
gene19857	65.6744	-1.5922	0.484572	-3.28579	0.00101695	0.00818527	23.9688	50.1072	9.61513	82.2433	66.8519	68.9824	133.802	87.7345	67.7643	LOC106991627
gene1988	901.88	-2.96586	0.582329	-5.09311	3.52e-07	1.2e-05	149.805	235.69	102.561	1413.61	1375.86	166.434	1709.24	1609.27	1354.46	LSAMP
gene1997	121.544	-2.41796	0.661649	-3.65444	0.000257746	0.0027556	16.9779	14.8466	61.9642	135.172	353.668	159.864	230.381	67.3032	53.7156	UPK1B
gene19981	21.9235	-2.88618	0.727703	-3.96616	7.3e-05	0.00101411	0.998698	10.207	1.06835	26.0573	37.739	15.3294	43.2592	18.0276	44.6252	P2RX3
gene19994	43.9908	1.40161	0.37965	3.69185	0.000222626	0.00246471	74.9024	75.1609	74.7843	30.1288	26.9564	33.9437	37.2231	31.2479	11.5695	YPEL4
gene19996	2093.59	1.3578	0.327261	4.14899	3.34e-05	0.000543058	3780.07	3147.48	3655.88	1284.95	1183.93	2351.97	1307.84	877.345	1252.81	ZDHHC5
gene2	12.3534	2.26921	0.599652	3.78421	0.0001542	0.00183285	24.9675	30.6211	22.4353	4.88574	3.23477	3.28488	4.02412	14.4221	3.30557	PDCD1
gene20045	76.487	-3.13518	0.71554	-4.38155	1.18e-05	0.000231224	26.9649	3.71165	6.41008	44.786	44.2085	244.176	76.4582	93.7438	147.924	LOC101108685
gene2007	16.354	-2.15011	0.546408	-3.93498	8.32e-05	0.00112788	4.99349	5.56747	4.27339	23.6144	32.3477	18.6143	13.0784	24.0369	20.6598	PLA1A
gene2009	694.784	-1.35103	0.413508	-3.26724	0.00108601	0.00859719	534.304	276.518	213.669	645.732	822.71	1403.74	657.943	1124.93	573.517	LOC101107153
gene20096	233.325	1.64434	0.293627	5.60011	2.14e-08	1.12e-06	335.563	585.512	360.033	159.601	117.53	144.535	160.965	97.3493	138.834	VPS26B
gene2010	459.105	-2.18276	0.521138	-4.18845	2.81e-05	0.000469205	145.81	132.691	131.407	635.147	474.433	122.635	998.987	841.29	649.545	MAATS1
gene20106	76.5587	1.3981	0.359913	3.88455	0.00010252	0.00132984	151.802	66.8097	173.072	46.4146	59.3041	48.1782	55.3316	49.2756	38.8405	LOC101103182
gene20107	88.4299	-4.3413	0.898122	-4.83376	1.34e-06	3.67e-05	1.9974	14.8466	2.13669	79.8005	222.121	347.102	31.1869	66.1014	30.5766	LOC105602432
gene20136	2706.93	1.67603	0.312176	5.36887	7.92e-08	3.4e-06	4191.54	4790.81	6001.98	1818.31	1397.42	835.454	1718.3	2009.48	1599.07	GABRP
gene20137	1331.53	-1.78243	0.520114	-3.427	0.000610284	0.00548452	509.336	630.98	380.332	1598.45	2019.57	323.013	1747.47	2509.45	2265.14	RANBP17
gene20160	117.563	2.71229	0.587965	4.61301	3.97e-06	9.2e-05	250.673	514.991	44.8706	48.0431	34.5042	35.0387	53.3195	46.8719	29.7502	STC2
gene20170	858.306	2.18056	0.313554	6.95433	3.54e-12	6.05e-10	1650.85	1675.81	2033.07	388.417	568.241	521.2	322.935	269.213	295.022	MSX2
gene20174	310.258	-1.37664	0.363739	-3.78469	0.000153901	0.00183176	234.694	124.34	91.8779	561.86	324.555	282.499	372.231	411.03	389.231	LOC101108339
gene20178	1100.1	1.00128	0.280546	3.56904	0.00035829	0.00362422	1393.18	1614.57	1945.46	1143.26	694.397	1041.31	717.299	662.216	689.212	ENC1
gene2018	11.2491	-3.62018	0.867619	-4.17254	3.01e-05	0.000498512	1.9974	0.927912	1.06835	17.9144	15.0956	14.2345	22.1326	7.21106	20.6598	HGD
gene20223	294.924	1.34818	0.204636	6.58817	4.45e-11	5.57e-09	434.434	521.487	530.969	223.93	212.417	208.042	171.025	171.864	180.154	CCNB1
gene20246	330.19	-2.03134	0.483003	-4.20564	2.6e-05	0.000440716	97.8724	167.952	57.6908	368.059	522.954	169.719	396.375	767.978	423.113	ADAMTS6
gene20251	87.7352	-2.36519	0.595893	-3.96916	7.21e-05	0.00100616	29.9609	26.9094	12.8202	48.0431	144.486	33.9437	197.182	183.882	112.39	FAM159B
gene20256	3023.6	-1.34134	0.366287	-3.66198	0.000250275	0.00269929	1549.98	1567.24	1367.48	4751.39	6005.89	2182.25	2377.25	4229.29	3181.62	RNF180
gene20270	721.796	-1.33971	0.38621	-3.46888	0.000522637	0.00487703	479.375	336.832	255.335	976.334	955.335	385.425	813.877	1249.92	1043.74	NDUFAF2
gene20279	4782.12	-2.21136	0.648884	-3.40795	0.000654534	0.0057722	1617.89	1869.74	706.178	7446.69	7519.76	527.77	6645.83	7628.1	9077.11	LOC101108953
gene20287	1465.42	1.97564	0.349334	5.65546	1.55e-08	8.63e-07	2231.09	2249.26	4261.64	562.675	1012.48	849.688	571.424	915.804	534.677	ACTBL2
gene20295	158.553	-2.96404	0.340854	-8.69592	3.44e-18	2.55e-15	17.9766	29.6932	38.4605	201.944	290.051	206.947	197.182	167.056	277.668	ANKRD55
gene20328	2699.34	-1.24323	0.364531	-3.4105	0.000648436	0.00574597	1786.67	1357.54	1091.85	2552.8	3060.09	5036.81	2045.26	4740.07	2622.97	NDUFS4
gene20349	514.017	-2.1451	0.490266	-4.37538	1.21e-05	0.000237306	143.813	175.375	150.637	701.918	751.545	165.339	526.153	949.456	1061.92	FGF10
gene20356	6932.25	1.62253	0.327038	4.96128	7e-07	2.14e-05	14090.6	7799.1	15933.3	4503.84	2458.42	4691.9	3869.19	5110.24	3933.63	HMGCS1
gene20367	2940.03	-1.59527	0.463313	-3.44317	0.000574931	0.00523034	1094.57	1581.16	1081.17	3581.25	4242.94	1000.79	3549.27	4512.92	5816.16	GHR
gene20375	21.9794	-2.32591	0.563608	-4.12682	3.68e-05	0.000588427	5.99219	5.56747	6.41008	28.5002	34.5042	13.1395	19.1146	43.2663	41.3197	MROH2B
gene20386	9.61414	-4.40781	1.20767	-3.64985	0.000262395	0.00279018	0	0.927912	1.06835	13.0286	6.46954	4.37984	24.1447	21.6332	14.8751	LOC105602672
gene2039	210.854	-1.97644	0.472283	-4.18486	2.85e-05	0.000476224	35.9531	80.7283	97.2196	143.315	308.381	151.104	292.754	478.334	309.898	CD86
gene20402	1859.78	-1.20007	0.235112	-5.10425	3.32e-07	1.14e-05	1076.6	1093.08	821.559	2403.79	2404.51	1723.47	2028.15	2879.62	2307.29	WDR70
gene20407	861.224	-1.26345	0.34496	-3.66261	0.000249654	0.00269505	299.609	721.916	314.094	1017.86	1347.82	929.62	862.167	1032.38	1225.54	SLC1A3
gene2041	36.2134	-2.08412	0.56932	-3.66072	0.000251506	0.0027101	1.9974	20.4141	11.7518	43.9717	45.2868	49.2731	30.1809	81.7253	41.3197	CASR
gene20416	102.517	-1.44052	0.448128	-3.21454	0.00130654	0.00987721	75.9011	33.4048	34.1871	179.144	172.521	147.819	97.5848	122.588	59.5003	CAPSL
gene20428	384.117	1.98446	0.492041	4.03312	5.5e-05	0.000813837	440.426	642.115	1213.64	167.744	182.225	63.5076	216.296	337.718	193.376	C1QTNF3
gene20459	6.49847	-3.8345	1.18351	-3.23995	0.00119553	0.0092506	1.9974	0	0	8.14291	9.70431	7.66471	6.03617	8.4129	16.5279	CDH9
gene20490	2615.56	-2.47469	0.584706	-4.23237	2.31e-05	0.000400231	570.257	927.912	444.433	4170.8	6455.52	527.77	4168.98	3077.92	3196.49	FBXL7
gene20497	56.2428	-1.57413	0.466363	-3.37534	0.000737235	0.00630931	16.9779	34.3327	21.3669	50.486	76.5562	53.653	131.79	40.8627	80.1602	DNAH5
gene20501	1055.42	-1.77911	0.513192	-3.46675	0.000526796	0.00490296	482.371	459.316	266.019	1582.17	924.066	371.191	2161.96	2150.1	1101.58	CTNND2
gene20520	50.7985	-1.79109	0.462958	-3.8688	0.000109371	0.00139727	23.9688	25.0536	8.54678	52.9289	39.8955	66.7925	76.4582	55.2848	108.258	C16H5orf49
gene20564	184.816	1.68487	0.301716	5.5843	2.35e-08	1.2e-06	258.663	413.849	353.623	135.172	118.608	77.7421	128.772	76.918	99.9936	LPCAT1
gene20568	85.0962	1.87549	0.460089	4.07637	4.57e-05	0.000702092	158.793	227.338	108.971	30.1288	38.8172	94.1665	46.2773	32.4498	28.9238	TERT
gene20578	706.291	-2.89897	0.499935	-5.7987	6.68e-09	4.28e-07	102.866	173.52	122.86	951.906	1417.91	217.897	1324.94	979.502	1065.22	TLL1
gene2058	148.769	-2.01744	0.476798	-4.23123	2.32e-05	0.000401089	48.9362	64.0259	34.1871	174.258	236.138	102.926	185.109	105.762	387.579	ADCY5
gene20584	10.9268	-2.54113	0.73579	-3.4536	0.000553158	0.00508173	1.9974	5.56747	0	17.9144	8.62605	18.6143	11.0663	18.0276	16.5279	RBM46
gene20590	27.4704	-2.64338	0.611313	-4.32411	1.53e-05	0.00028895	1.9974	3.71165	12.8202	31.7573	18.3304	62.4127	38.2291	43.2663	34.7085	DCHS2
gene20593	33.1998	-2.01789	0.620807	-3.25043	0.00115231	0.00898674	8.98828	20.4141	3.20504	17.9144	34.5042	33.9437	48.2894	48.0737	83.4657	RNF175
gene20621	17.6284	-3.24453	0.779863	-4.16039	3.18e-05	0.000521916	2.99609	2.78374	2.13669	19.543	60.3824	8.75967	18.1085	21.6332	22.3126	LOC105602713
gene20622	23.7066	-3.53151	0.786902	-4.48786	7.19e-06	0.000151549	5.99219	2.78374	0	51.3003	58.2259	14.2345	15.0904	25.2387	40.4933	LOC106991695
gene20636	141.024	-2.04416	0.513245	-3.98281	6.81e-05	0.000962126	59.9219	47.3235	29.9137	179.144	263.095	41.6084	225.35	205.515	217.341	TTC29
gene20659	2128.43	1.09236	0.281853	3.87565	0.000106339	0.00137037	2454.8	3089.95	4339.63	1492.59	1599.05	1090.58	1425.54	2016.69	1647	USP38
gene20660	3505.01	-1.68691	0.51925	-3.24874	0.00115919	0.00901566	1434.13	1456.82	1349.32	4625.98	5627.42	790.56	5189.1	6900.98	4170.81	INPP4B
gene20670	706.654	-1.62982	0.377944	-4.31233	1.62e-05	0.000301012	250.673	350.751	283.112	758.919	1049.14	366.811	1091.54	1052.81	1156.12	RNF150
gene20762	4.62096	-5.23185	1.61371	-3.24212	0.00118645	0.00919239	0	0	0	3.25716	7.5478	18.6143	0	7.21106	4.95836	ADAD1
gene20785	9.71697	-3.80483	1.03325	-3.6824	0.000231048	0.00254166	1.9974	0	1.06835	8.14291	19.4086	6.56975	8.04823	24.0369	18.1807	RXFP1
gene20793	20.381	-2.96634	0.691217	-4.29147	1.77e-05	0.00032595	3.99479	2.78374	4.27339	22.8001	32.3477	62.4127	12.0723	20.4313	22.3126	GRIA2
gene20794	13.9071	-6.82703	1.50836	-4.52614	6.01e-06	0.000130889	0	0	0	5.70003	12.9391	61.3177	2.01206	19.2295	23.9654	GLRB
gene20821	81.9519	-1.52656	0.423632	-3.6035	0.000313959	0.00324701	29.9609	49.1793	29.9137	109.929	99.1996	44.8933	138.832	87.7345	147.924	PXMP2
gene20848	80.6194	-3.35098	0.371064	-9.03072	1.71e-19	1.59e-16	11.9844	9.27912	12.8202	138.429	115.373	79.932	103.621	117.781	136.355	TMEM132D
gene20850	79.2404	-2.93723	0.627885	-4.67797	2.9e-06	7.03e-05	12.9831	7.4233	23.5036	173.444	53.9128	25.1841	118.711	168.258	129.744	GLT1D1
gene20879	5494.45	1.04602	0.244399	4.27995	1.87e-05	0.000340822	7130.7	8556.28	9432.44	4495.7	4253.72	5360.92	3287.7	3277.43	3655.14	ZNF664
gene20885	513.138	1.22544	0.37346	3.28131	0.00103326	0.00828378	790.969	849.967	848.268	409.588	293.286	647.121	298.791	206.717	273.536	EIF2B1
gene20907	622.343	1.36749	0.356014	3.84112	0.000122473	0.0015273	1207.43	805.428	1142.06	363.174	514.328	563.904	490.942	295.653	218.168	LOC101102014
gene2094	817.313	1.37445	0.363377	3.78242	0.000155313	0.00183869	1264.35	1553.32	1335.43	702.733	441.007	234.321	737.419	522.802	564.427	TNK2
gene20960	76.3748	1.55553	0.27881	5.57916	2.42e-08	1.23e-06	124.837	114.133	169.867	48.8574	42.052	55.8429	39.2351	52.8811	39.6669	FAM109A
gene20966	448.563	-1.30607	0.39931	-3.27081	0.0010724	0.00851682	262.658	257.032	159.184	505.674	507.859	223.372	668.003	773.987	679.295	LOC101105533
gene20975	2963.11	1.70284	0.25709	6.6235	3.51e-11	4.51e-09	5764.49	5057.12	5697.5	1646.5	1878.32	2330.07	1660.95	1180.21	1452.8	HSPB8
gene20988	34.6035	-1.94854	0.455617	-4.27669	1.9e-05	0.000342677	6.99089	13.9187	14.9569	45.6003	51.7563	39.4185	37.2231	28.8442	72.7226	KSR2
gene210	1099.87	1.3783	0.406448	3.39109	0.000696156	0.00602747	1872.56	1815.92	1905.93	613.975	693.319	1466.15	441.647	455.499	633.844	HEYL
gene21033	1228.66	-1.71115	0.477861	-3.58086	0.000342471	0.00349316	749.024	367.453	348.281	1368.01	2653.59	1422.35	832.992	2502.24	813.998	RPL6
gene21050	380.555	1.79829	0.278251	6.46283	1.03e-10	1.15e-08	642.163	725.627	807.671	195.43	199.477	163.149	286.718	150.23	254.529	RAB35
gene21057	51.597	1.18895	0.36744	3.23576	0.00121321	0.00933053	87.8854	97.4308	61.9642	41.5288	38.8172	19.7093	51.3075	38.459	27.271	MSI1
gene21064	3391.14	1.26871	0.254471	4.98569	6.17e-07	1.93e-05	5289.11	5111.87	6276.54	2275.94	2253.56	2979.38	2646.86	1538.36	2148.62	RNF10
gene21069	1011.93	1.453	0.324012	4.48438	7.31e-06	0.000153674	1755.71	1497.65	2009.56	646.547	532.659	1053.35	631.786	407.425	572.691	UNC119B
gene21195	64.9786	1.81831	0.302642	6.00813	1.88e-09	1.43e-07	111.854	106.71	154.91	45.6003	34.5042	36.1336	38.2291	31.2479	25.6182	PLA2G3
gene21198	622.825	1.20711	0.297865	4.05255	5.07e-05	0.000766332	1115.55	746.969	1141	460.888	306.225	636.171	428.568	412.232	357.828	PIK3IP1
gene21199	734.712	1.0916	0.33091	3.29877	0.000971079	0.0078958	1205.43	1163.6	1041.64	416.102	569.319	884.727	569.412	360.553	401.627	PATZ1
gene21204	247.274	1.45783	0.2802	5.20283	1.96e-07	7.35e-06	446.418	449.109	393.152	202.758	143.408	93.0715	175.049	151.432	171.063	PISD
gene2121	780.099	1.04911	0.309422	3.39053	0.000697565	0.00603672	1579.94	822.13	1167.7	618.861	529.424	601.132	646.877	699.473	355.349	BDH1
gene21211	10.9306	-3.57088	0.99718	-3.58098	0.000342311	0.00349316	1.9974	0.927912	1.06835	13.8429	2.15651	8.75967	25.1507	18.0276	26.4446	LOC101117536
gene21229	67.2059	2.52784	0.389788	6.48517	8.86e-11	1e-08	91.8802	149.394	207.259	13.8429	28.0347	32.8488	31.1869	26.4405	23.9654	ZNF70
gene21239	12686.6	2.54279	0.488889	5.20115	1.98e-07	7.37e-06	26095	27022.7	31887	11003.5	4239.7	5586.48	2425.54	3401.22	2518.02	LOC106991688
gene21244	334.177	1.42356	0.3268	4.35607	1.32e-05	0.000256149	446.418	729.339	548.062	321.645	171.443	210.232	243.459	137.01	199.987	CABIN1
gene21245	504.284	1.87914	0.481721	3.90088	9.58e-05	0.00125994	1534	591.08	815.149	420.988	146.643	168.624	387.321	329.305	145.445	SUSD2
gene21247	433.921	1.69332	0.427139	3.96432	7.36e-05	0.0010164	1041.64	881.516	489.303	195.43	386.016	316.443	304.827	169.46	120.653	GGT1
gene21249	594.606	1.58965	0.253305	6.27564	3.48e-10	3.53e-08	1175.47	1058.75	979.675	250.801	355.825	383.236	459.755	395.406	292.543	GUCD1
gene21255	428.958	1.48101	0.350986	4.21958	2.45e-05	0.000417528	748.025	741.402	759.595	185.658	218.886	473.022	231.387	191.093	311.55	BCR
gene21261	258.245	1.48604	0.384443	3.86545	0.000110886	0.00141257	423.448	643.971	288.454	171.001	144.486	244.176	195.17	96.1474	117.348	TOP3B
gene2127	948.488	1.10569	0.288182	3.83679	0.000124653	0.00154724	1525.01	1145.04	1754.23	570.003	1045.91	549.669	666.997	648.995	630.538	FAM43A
gene21273	1568.73	1.50018	0.4366	3.43606	0.000590236	0.00533405	2421.84	3143.77	2705.06	758.104	707.336	2030.05	1099.59	499.967	752.844	PI4KA
gene21275	605.075	1.82731	0.356722	5.12251	3.02e-07	1.05e-05	959.749	1115.35	1408.08	271.159	302.99	232.131	585.509	234.359	336.342	CRKL
gene21288	245.171	1.40825	0.27245	5.16886	2.36e-07	8.52e-06	480.374	424.056	353.623	139.244	138.017	229.941	170.019	124.992	146.272	LOC101119851
gene21291	235.785	2.04806	0.43898	4.6655	3.08e-06	7.39e-05	566.262	386.939	476.483	77.3576	97.0431	252.935	100.603	92.5419	71.8962	DGCR14
gene21326	482.322	-4.1332	0.709869	-5.82248	5.8e-09	3.77e-07	82.8919	28.7653	8.54678	765.433	665.284	173.003	1612.66	373.773	630.538	GABRG3
gene2133	12839.6	1.97495	0.467344	4.22591	2.38e-05	0.000408311	23349.6	21371.7	31868.8	6465.47	6252.81	14429.4	3677.04	4398.75	3742.74	LRRC15
gene2134	49.534	1.88842	0.44588	4.23526	2.28e-05	0.000396674	86.8867	103.926	98.288	17.1001	29.1129	53.653	22.1326	13.2203	21.4862	CPN2
gene21346	1578.78	-1.31823	0.355119	-3.71208	0.000205566	0.00230749	888.841	717.276	767.073	1850.07	2063.78	873.777	2066.38	2924.08	2057.72	LRRC28
gene21378	16.804	-2.67106	0.64319	-4.15283	3.28e-05	0.000535483	2.99609	2.78374	5.34174	21.1716	28.0347	35.0387	12.0723	13.2203	30.5766	SV2B
gene21385	55.0911	-3.92346	0.597629	-6.56504	5.2e-11	6.33e-09	2.99609	7.4233	5.34174	39.0859	62.5389	53.653	80.4823	88.9364	155.362	AGBL1
gene21395	106.385	2.01183	0.315148	6.38374	1.73e-10	1.88e-08	171.776	223.627	245.72	61.8861	60.3824	47.0832	40.2412	34.8534	71.8962	AEN
gene2143	134.719	-1.21342	0.372369	-3.25865	0.00111942	0.00880366	77.8985	77.0167	59.8275	126.215	250.156	105.116	128.772	240.369	147.098	FGF12
gene21441	433.756	-3.53299	0.793972	-4.44976	8.6e-06	0.000176686	66.9128	44.5398	50.2123	54.5575	411.894	1184.75	577.461	120.184	1393.3	PLIN1
gene21446	60.0772	2.86669	0.715112	4.00872	6.1e-05	0.000884247	339.557	27.8374	56.6224	10.5858	20.4869	16.4244	33.199	25.2387	10.7431	MESP2
gene21465	375.26	1.61419	0.263707	6.12112	9.29e-10	8.17e-08	550.283	805.428	688.016	234.516	223.199	213.517	252.513	145.423	264.446	MAN2A2
gene21467	858.316	2.45492	0.392971	6.24709	4.18e-10	4.13e-08	1750.72	1650.76	2259.55	419.36	290.051	147.819	543.256	271.617	391.711	FURIN
gene21527	463.715	-1.42914	0.317133	-4.50644	6.59e-06	0.000141044	178.767	295.076	179.482	417.731	585.493	475.212	711.262	515.591	814.824	IL16
gene21544	342.094	1.1925	0.362239	3.29202	0.000994697	0.00803266	620.192	461.172	559.814	147.387	366.607	332.867	202.212	230.754	157.841	NSMCE3
gene2155	1919.55	2.11176	0.547627	3.8562	0.000115162	0.00145142	1902.52	4015.08	5893	983.663	1191.47	194.903	950.697	1404.95	739.622	CLDN1
gene21559	351.56	-1.79058	0.523497	-3.42042	0.000625246	0.00558507	259.662	70.5213	69.4426	680.747	674.989	340.532	243.459	317.287	507.406	CHRNA7
gene21563	44.5936	-1.31082	0.405984	-3.22875	0.00124335	0.00951695	27.9635	22.2699	17.0936	54.5575	32.3477	39.4185	81.4883	60.0922	66.1115	OTUD7A
gene21619	365.8	1.69508	0.240691	7.04258	1.89e-12	3.56e-10	740.035	608.71	685.879	173.444	232.903	221.182	274.646	182.68	172.716	C18H15orf39
gene2162	6725.7	-1.79622	0.527302	-3.40644	0.000658154	0.00579737	2550.68	3595.66	1471.11	8740.59	10504.4	1734.41	9101.54	12127.8	10705.1	LPP
gene21627	1502.64	1.2126	0.223313	5.43005	5.63e-08	2.55e-06	2336.95	2293.8	2628.13	1047.99	919.753	1401.55	1083.49	954.263	857.796	SCAMP2
gene21632	251.776	-5.22335	0.797396	-6.55051	5.73e-11	6.83e-09	11.9844	8.35121	9.61513	807.776	204.869	107.306	867.197	61.294	187.591	CYP1A1
gene21641	127.857	1.58101	0.266453	5.93351	2.97e-09	2.15e-07	176.77	267.239	245.72	74.9147	78.7127	54.7479	91.5486	81.7253	79.3338	SEMA7A
gene21653	33.2868	-4.02015	0.746552	-5.38495	7.25e-08	3.15e-06	4.99349	1.85582	2.13669	42.3431	46.365	9.85463	67.4039	44.4682	80.1602	LOC101112678
gene21664	1438.13	-1.46209	0.245975	-5.94405	2.78e-09	2.03e-07	736.041	670.88	581.181	1753.98	2132.79	1223.07	1770.61	1919.34	2155.23	STXBP6
gene21668	1176.89	-2.2827	0.46593	-4.89922	9.62e-07	2.81e-05	278.637	474.163	233.968	1033.33	1624.93	581.423	1627.75	2206.58	2531.24	NOVA1
gene21678	1441.49	-2.41195	0.446275	-5.40463	6.49e-08	2.87e-06	334.564	489.938	289.522	1618	2870.32	681.064	1619.71	2159.71	2910.56	PRKD1
gene217	140.396	1.65179	0.511538	3.22907	0.00124194	0.00951087	247.677	258.887	264.95	43.9717	93.8083	197.093	57.3437	57.6885	42.1461	MYCL
gene21702	860.234	-1.9258	0.594706	-3.23824	0.00120269	0.00928988	358.533	387.867	153.842	1117.21	1623.85	148.914	1192.14	1223.48	1536.27	NPAS3
gene2179	2944.13	-4.08441	0.820703	-4.97672	6.47e-07	2.01e-05	193.747	128.052	436.954	456.003	3038.53	8421.33	3435.59	669.427	9717.56	ADIPOQ
gene21791	111.323	1.16888	0.312077	3.7455	0.000180034	0.00206528	176.77	122.484	230.763	80.6148	97.0431	89.7866	73.4401	78.1198	52.8892	LCMT2
gene21796	829.266	1.30772	0.342652	3.81647	0.000135377	0.00165453	1491.06	1331.55	1305.52	502.417	654.502	878.157	515.087	288.442	496.662	MAP1A
gene21798	859.023	1.68354	0.476791	3.53099	0.000414002	0.0040417	2074.3	809.139	1881.36	762.99	317.007	291.259	738.425	599.72	257.008	CKMT1A
gene21810	291.337	-2.24539	0.518927	-4.32698	1.51e-05	0.000286184	94.8763	104.854	50.2123	416.102	352.59	104.021	309.857	712.693	476.829	FRMD5
gene21819	1303.8	1.18742	0.240961	4.92787	8.31e-07	2.49e-05	1830.61	2021.92	2395.23	852.562	1196.86	755.522	1067.4	759.565	854.491	FBLN5
gene2182	25.208	-1.67369	0.517079	-3.23682	0.00120871	0.00931203	11.9844	10.207	8.54678	34.2002	12.9391	38.3236	21.1266	43.2663	46.278	KNG1
gene21839	17.6459	-2.89846	0.666167	-4.35095	1.36e-05	0.000259948	6.99089	1.85582	1.06835	17.1001	42.052	25.1841	19.1146	26.4405	19.0071	UNC79
gene21843	21.4306	-3.56401	1.10491	-3.22563	0.00125697	0.00959644	2.99609	3.71165	1.06835	10.5858	12.9391	88.6917	8.04823	1.20184	63.6323	LOC101114311
gene21844	406.618	1.83096	0.341767	5.35734	8.45e-08	3.57e-06	517.326	709.853	1115.35	201.944	232.903	326.298	220.32	156.24	179.327	OTUB2
gene21845	1793.83	1.05344	0.292534	3.6011	0.000316878	0.00326968	3485.46	2350.4	2385.62	1130.24	1561.32	1876.76	1215.28	951.86	1187.53	DDX24
gene2185	61.0235	1.51316	0.389139	3.88849	0.00010087	0.00131035	135.823	78.8725	107.903	36.6431	18.3304	37.2286	39.2351	61.294	33.8821	AHSG
gene21854	2411.59	2.87404	0.517764	5.55087	2.84e-08	1.42e-06	5181.25	3744.12	8126.92	828.133	476.589	235.416	1408.44	1085.26	618.142	SERPINA1
gene21884	43.0706	-1.94085	0.348109	-5.57541	2.47e-08	1.26e-06	14.9805	14.8466	14.9569	59.4432	62.5389	48.1782	48.2894	51.6793	72.7226	AK7
gene2189	109.17	-1.99868	0.411785	-4.85372	1.21e-06	3.38e-05	40.9466	51.0352	17.0936	205.201	100.278	135.775	136.82	106.964	188.418	CRYGS
gene21895	454.347	2.12655	0.394689	5.3879	7.13e-08	3.12e-06	993.705	818.418	992.495	201.13	154.191	421.559	164.989	128.597	214.036	CCDC85C
gene219	3941.52	1.25606	0.271957	4.6186	3.86e-06	9e-05	6704.26	5150.84	7451.72	2863.86	2703.19	3757.9	2709.24	2028.71	2104	CAP1
gene21907	443.529	-1.3438	0.30244	-4.44319	8.86e-06	0.000180739	263.656	270.022	122.86	558.603	527.267	676.685	489.936	481.939	600.788	WDR25
gene21975	6297.25	1.61869	0.458749	3.52848	0.000417956	0.00406578	10817.9	10845.4	12658.8	3109.78	2573.8	8393.95	3614.66	1841.22	2819.65	DYNC1H1
gene21992	1725.92	1.20732	0.341345	3.53696	0.000404767	0.00397998	2185.15	3101.08	3038.38	1498.29	1179.61	637.266	1491.94	880.951	1520.56	CDC42BPB
gene22	2341.02	2.59229	0.548358	4.72737	2.27e-06	5.76e-05	6048.12	5670.47	4102.45	377.017	836.727	2084.8	828.968	814.85	305.766	C1H2orf54
gene220	3674.53	1.15573	0.23783	4.85946	1.18e-06	3.32e-05	6406.65	4655.33	6365.21	2854.9	1897.73	3005.66	2952.7	2583.96	2348.61	PPT1
gene22008	200.031	1.52021	0.373436	4.07088	4.68e-05	0.000717612	440.426	316.418	303.411	95.272	134.782	223.372	110.663	81.7253	94.2089	TRMT61A
gene22009	1018.22	1.25533	0.335665	3.73984	0.000184141	0.00210288	1460.1	1392.8	2133.49	662.833	599.511	1150.8	734.401	474.728	555.336	BAG5
gene22013	170.948	1.45488	0.274343	5.30314	1.14e-07	4.68e-06	345.55	337.76	206.191	133.544	92.7301	98.5463	112.675	118.982	92.5561	XRCC3
gene22016	64.0486	-2.53949	0.62729	-4.04835	5.16e-05	0.000772946	14.9805	15.7745	14.9569	134.358	65.7736	16.4244	161.971	48.0737	104.126	TDRD9
gene22019	276.694	1.38767	0.334774	4.14509	3.4e-05	0.000550357	464.395	550.252	396.357	148.201	195.164	278.12	209.254	112.973	135.529	KIF26A
gene22030	298.217	2.53459	0.254995	9.93977	2.79e-23	4.96e-20	658.142	599.431	738.228	102.601	88.417	101.831	156.941	106.964	131.397	CEP170B
gene22035	72.488	1.95088	0.339844	5.7405	9.44e-09	5.74e-07	124.837	126.196	178.414	29.3145	51.7563	50.3681	36.217	28.8442	26.4446	CDCA4
gene22060	1208.38	1.12533	0.247431	4.54806	5.41e-06	0.000120486	1693.79	2134.2	1846.1	985.292	792.519	1029.26	1025.14	612.94	756.15	DBNL
gene22064	2120.99	-1.36725	0.300249	-4.55371	5.27e-06	0.000117589	1176.47	1061.53	861.088	2679.83	2945.8	1433.3	2772.62	2775.06	3383.26	LANCL2
gene22068	238.679	-1.71635	0.478942	-3.58363	0.000338849	0.00346418	109.857	115.989	57.6908	207.644	518.641	111.686	327.965	278.828	419.808	NEK10
gene2207	412.756	1.41321	0.356001	3.96968	7.2e-05	0.00100473	858.88	477.875	784.167	210.087	276.034	417.179	269.616	265.607	155.362	MAGEF1
gene22076	128.172	-2.95153	0.38207	-7.7251	1.12e-14	3.89e-12	17.9766	30.6211	21.3669	280.116	143.408	118.256	183.097	156.24	202.466	LOC106991755
gene2208	1728.38	1.25904	0.344569	3.65397	0.000258217	0.00275732	3133.91	2459.89	2880.26	1363.94	903.579	1982.97	1183.09	843.694	804.081	EPHB3
gene2209	1863.82	2.56774	0.343441	7.47652	7.63e-14	2.22e-11	4466.18	3327.49	4748.8	881.877	577.946	804.795	666.997	948.254	352.044	LOC101119356
gene2211	227.649	2.31113	0.280885	8.22804	1.9e-16	9.39e-14	650.153	385.083	425.202	105.043	67.9302	112.781	104.627	102.157	95.8616	CHRD
gene22114	251.952	-1.60081	0.40398	-3.9626	7.41e-05	0.00102215	109.857	123.412	87.6045	269.53	456.103	154.389	254.525	295.653	516.496	STAC
gene22121	164.104	-1.03792	0.315725	-3.28742	0.00101108	0.00814823	81.8933	84.44	122.86	161.23	293.286	187.238	151.91	227.148	166.931	DCLK3
gene22125	1092.59	-1.67211	0.276977	-6.03699	1.57e-09	1.23e-07	328.572	509.424	495.713	1385.11	1721.98	1024.88	1407.43	1182.61	1777.57	ITGA9
gene22133	89.9295	2.14156	0.558421	3.83502	0.000125555	0.00155151	128.832	205.069	223.285	41.5288	71.1649	6.56975	57.3437	27.6424	47.9308	MYD88
gene22142	208.916	-1.2446	0.38475	-3.23484	0.00121713	0.00935256	154.798	100.214	72.6476	418.545	250.156	185.048	299.797	227.148	171.89	SCN11A
gene22146	300.836	1.48751	0.274654	5.41594	6.1e-08	2.72e-06	450.413	581.801	549.131	216.601	221.043	136.87	199.194	131.001	221.473	GORASP1
gene22152	37.6806	1.82965	0.52703	3.47163	0.000517312	0.00484261	26.9649	68.6655	121.792	32.5716	18.3304	13.1395	27.1628	15.624	14.8751	CX3CR1
gene2216	6197.04	1.82793	0.367277	4.97697	6.46e-07	2.01e-05	10310.6	11720.5	13644.9	3493.31	2958.74	6009.13	2775.63	1848.43	3012.2	EIF4G1
gene22161	506.411	-1.90844	0.511062	-3.73426	0.000188269	0.00214039	242.684	153.105	139.954	549.646	841.04	156.579	911.462	549.242	1013.98	MYRIP
gene2217	4061.31	1.35092	0.40371	3.34627	0.000819062	0.00685433	7269.52	5538.71	7679.28	2566.64	2359.23	5405.81	2232.38	1657.34	1842.86	PSMD2
gene22172	981.398	-1.11837	0.341036	-3.27934	0.00104051	0.00832445	581.242	667.169	404.904	1447.81	1411.44	569.379	1287.72	1188.62	1274.3	ULK4
gene22182	514.959	1.67392	0.240545	6.95884	3.43e-12	5.92e-10	939.775	856.463	1052.32	246.73	389.251	303.304	342.05	242.772	261.967	ZBTB47
gene22185	66.9648	-1.76983	0.442613	-3.99859	6.37e-05	0.000912538	31.9583	19.4862	25.6403	74.9147	85.1823	163.149	91.5486	50.4774	60.3267	HHATL
gene22191	16.6736	1.59015	0.455886	3.48806	0.000486548	0.0045958	30.9596	26.9094	32.0504	10.5858	6.46954	14.2345	13.0784	10.8166	4.95836	LOC106990281
gene22192	145.392	1.97991	0.348307	5.68439	1.31e-08	7.54e-07	213.721	262.599	392.084	70.8433	75.478	54.7479	118.711	62.4958	57.8475	LOC101119853
gene22210	16.3122	-2.67627	0.754031	-3.54929	0.000386277	0.00383856	0.998698	8.35121	1.06835	8.9572	17.2521	24.0891	18.1085	32.4498	35.5349	LOC101119258
gene22231	401.194	-2.917	0.78213	-3.72955	0.00019182	0.00217478	123.839	42.6839	57.6908	134.358	285.738	1676.38	290.742	124.992	874.324	CIDEC
gene2224	1715.95	1.77788	0.239784	7.41449	1.22e-13	3.44e-11	3106.95	2915.5	3731.74	855.005	1167.75	1174.89	926.553	737.932	827.22	AP2M1
gene22250	598.239	-1.17411	0.297906	-3.9412	8.11e-05	0.00110073	292.619	424.056	259.608	833.834	892.796	453.313	731.383	830.474	666.073	SRGAP3
gene22269	1562.02	-1.40445	0.372077	-3.77462	0.000160252	0.00188212	659.141	970.596	603.616	2038.17	2127.4	808.08	2350.08	2022.7	2478.35	ITPR1
gene22283	494.983	-2.08446	0.468314	-4.451	8.55e-06	0.000175875	145.81	196.717	127.133	718.204	993.074	175.193	708.244	813.648	576.823	CNTN4
gene22286	14.2663	-4.96236	1.37631	-3.60555	0.000311498	0.00322917	0.998698	0	1.06835	13.8429	8.62605	62.4127	2.01206	33.6516	5.78475	CNTN6
gene22288	77.874	-2.67463	0.406604	-6.57798	4.77e-11	5.88e-09	18.9753	13.9187	18.1619	109.115	95.9648	61.3177	89.5366	128.597	165.279	CNTN3
gene22306	63.3833	-1.71495	0.481837	-3.5592	0.000371992	0.00373107	25.9662	35.2607	13.8885	28.5002	102.434	98.5463	79.4763	78.1198	108.258	LMOD3
gene22311	161.133	-1.53884	0.39727	-3.87353	0.000107269	0.00137836	56.9258	107.638	48.0756	236.144	294.364	141.25	122.736	206.717	236.349	FAM19A4
gene22313	32.9706	-2.73029	0.472907	-5.77341	7.77e-09	4.84e-07	9.98698	6.49538	4.27339	63.5147	40.9737	50.3681	29.1748	45.67	46.278	FAM19A1
gene22329	1507.89	-1.63866	0.5018	-3.26557	0.00109246	0.00862984	564.264	809.139	504.26	1386.74	2918.84	682.159	1545.26	1384.52	3775.79	ADAMTS9
gene22341	18.4545	-2.68723	0.571856	-4.69913	2.61e-06	6.48e-05	5.99219	3.71165	2.13669	21.9858	26.9564	36.1336	20.1206	30.0461	19.0071	SYNPR
gene22344	206.389	-2.71858	0.776045	-3.50312	0.00045985	0.00440454	31.9583	43.6119	55.5541	171.001	157.425	32.8488	599.593	675.436	90.0769	CADPS
gene22347	2450.68	-1.66357	0.461543	-3.60437	0.000312909	0.00324002	833.913	1337.12	835.448	3519.36	3922.7	816.839	3149.88	3420.45	4220.39	PTPRG
gene22352	3447.11	-1.81393	0.374154	-4.84809	1.25e-06	3.46e-05	1856.58	1331.55	674.127	4034	5158.38	3129.39	3463.76	6378.18	4998.03	FHIT
gene22375	153.616	1.28591	0.244469	5.26001	1.44e-07	5.67e-06	214.72	228.266	317.299	127.029	103.513	102.926	90.5426	94.9456	103.299	PDE12
gene22385	2093.46	-1.47391	0.395348	-3.72813	0.000192903	0.00218468	958.75	1166.39	748.912	3474.58	2191.02	1025.98	2643.84	3398.81	3232.85	ARHGEF3
gene22389	769.967	-3.18246	0.634013	-5.01956	5.18e-07	1.65e-05	150.803	153.105	57.6908	1316.71	1572.1	111.686	999.993	1407.36	1160.26	ERC2
gene22392	321.763	1.18805	0.296508	4.00682	6.15e-05	0.000888516	295.615	657.89	588.659	251.616	241.529	201.472	240.441	221.139	197.508	WNT5A
gene22396	1155.61	-1.67201	0.477557	-3.50118	0.000463202	0.00442934	481.373	723.771	205.123	1778.41	1511.72	562.809	1782.68	2109.23	1245.38	CACNA2D3
gene22401	148.999	-2.02933	0.274719	-7.38694	1.5e-13	4.1e-11	48.9362	58.4585	38.4605	144.944	235.06	198.188	217.302	207.919	191.723	CHDH
gene22402	398.046	-2.70214	0.428387	-6.3077	2.83e-10	2.92e-08	80.8946	132.691	41.6655	615.604	516.485	252.935	686.112	621.353	634.67	CACNA1D
gene22426	483.556	1.32329	0.411969	3.21212	0.0013176	0.00992701	466.392	1210.93	741.433	271.159	371.999	491.636	299.797	159.845	338.821	STAB1
gene22429	179.525	2.75948	0.514546	5.36294	8.19e-08	3.5e-06	301.607	489.938	456.184	77.3576	111.06	30.6588	80.4823	18.0276	50.41	SEMA3G
gene22431	530.097	2.00175	0.199506	10.0335	1.09e-23	2.41e-20	931.785	985.442	1264.92	249.987	288.973	279.214	275.652	227.148	267.751	BAP1
gene22443	1600.11	1.33478	0.248405	5.37339	7.73e-08	3.33e-06	2608.6	2822.71	2600.36	947.834	880.936	1574.55	1001	991.521	973.492	DUSP7
gene22469	475.313	1.87077	0.316334	5.91389	3.34e-09	2.36e-07	875.858	838.832	1050.19	205.201	295.442	404.04	228.369	192.295	187.591	RBM15B
gene22496	1229	1.44839	0.297975	4.86078	1.17e-06	3.31e-05	2125.23	2025.63	2232.85	1002.39	704.102	1019.41	830.98	454.297	666.073	SEMA3F
gene22517	3706.2	1.28293	0.336198	3.81601	0.000135629	0.00165646	5933.27	5753.98	6620.55	2183.93	2351.68	4499.19	2221.31	1723.44	2068.46	DAG1
gene22533	974.504	1.27414	0.272859	4.66958	3.02e-06	7.27e-05	1414.16	1784.37	1602.52	668.533	512.172	815.744	853.113	455.499	664.42	USP19
gene22545	67.4505	1.28425	0.335909	3.82322	0.000131722	0.00161787	130.829	90.9354	112.176	37.4574	43.1303	40.5135	60.3617	28.8442	62.8059	ARIH2OS
gene22592	1135.65	1.31145	0.257454	5.09391	3.51e-07	1.19e-05	1785.67	1921.71	1952.94	898.977	598.432	936.19	918.504	582.894	625.58	NBEAL2
gene22595	33.3207	-2.67393	0.707671	-3.77849	0.00015778	0.00185923	7.98959	8.35121	5.34174	43.9717	31.2694	24.0891	72.4341	97.3493	9.09033	MYL3
gene22607	21.6807	3.26417	0.739057	4.41667	1e-05	0.000200443	27.9635	94.647	38.4605	4.07145	9.70431	1.09496	1.00603	13.2203	4.95836	TDGF1
gene22626	148.207	-1.14421	0.345078	-3.3158	0.000913822	0.00751628	78.8972	118.773	48.0756	161.23	171.443	130.3	225.35	176.671	223.126	SLC6A20
gene2267	1052.71	-1.3194	0.376853	-3.5011	0.000463347	0.00442934	479.375	554.891	546.994	1117.21	1300.38	580.328	1296.77	2159.71	1438.75	KCNMB3
gene22694	2257.23	1.21036	0.334218	3.62145	0.000292954	0.00307645	2458.79	3853.62	4585.35	2050.38	1400.66	1051.16	1934.59	1112.91	1867.65	TMEM43
gene22700	653.265	1.25723	0.304169	4.13334	3.58e-05	0.000575101	855.884	1393.72	951.898	493.46	543.441	400.755	522.129	264.405	453.69	NUP210
gene22702	67.7537	2.51651	0.476833	5.27755	1.31e-07	5.22e-06	86.8867	191.15	174.141	26.0573	30.1912	8.75967	45.2713	19.2295	28.0974	IQSEC1
gene2271	44.1853	-2.29203	0.394004	-5.81728	5.98e-09	3.88e-07	15.9792	11.1349	9.61513	55.3718	50.6781	73.3622	42.2532	78.1198	61.1531	KCNMB2
gene22740	94.2824	-2.66915	0.443086	-6.02401	1.7e-09	1.32e-07	15.9792	30.6211	14.9569	80.6148	134.782	205.852	78.4703	128.597	158.668	KHDRBS2
gene22758	29.7605	-2.50633	0.515135	-4.8654	1.14e-06	3.25e-05	10.9857	8.35121	2.13669	45.6003	39.8955	26.279	58.3497	45.67	30.5766	BMP5
gene22761	9.37296	-6.26562	1.50159	-4.17267	3.01e-05	0.000498512	0	0	0	3.25716	11.8608	17.5193	19.1146	1.20184	31.403	GFRAL
gene22768	134.204	-1.60696	0.410736	-3.91238	9.14e-05	0.00121476	44.9414	68.6655	56.6224	89.572	272.799	155.484	179.073	111.771	228.911	MLIP
gene22777	760.035	1.5553	0.285938	5.43928	5.35e-08	2.43e-06	1445.12	950.182	1675.17	482.874	452.868	618.652	489.936	356.947	368.572	TAP2
gene2278	11509.7	-2.68225	0.654432	-4.0986	4.16e-05	0.000646916	3109.95	2928.49	1447.61	14941.4	19107.8	1220.88	15835.9	25426.2	19569	NAALADL2
gene22798	190.469	1.86138	0.276811	6.72436	1.76e-11	2.57e-09	430.439	284.869	389.947	114.001	121.843	88.6917	80.4823	123.79	80.1602	ZBTB22
gene2281	1317.03	-2.47269	0.584804	-4.22823	2.36e-05	0.000405295	476.379	333.12	169.867	1126.16	3131.26	353.672	1530.17	2438.54	2294.07	NLGN1
gene22818	1090.5	1.9196	0.291026	6.59598	4.22e-11	5.36e-09	2014.37	2110.07	2295.88	651.432	553.146	353.672	763.576	641.784	430.551	HMGA1
gene22827	550.396	1.60439	0.489195	3.27965	0.00103935	0.00832137	1268.35	1063.39	655.965	249.173	617.841	163.149	479.876	300.461	155.362	SPDEF
gene2285	11.6227	-5.59093	1.2995	-4.30238	1.69e-05	0.000312571	0	0.927912	0	11.4001	33.426	14.2345	10.0603	18.0276	16.5279	SPATA16
gene22868	1735.33	1.20225	0.244808	4.91099	9.06e-07	2.67e-05	2073.3	2522.06	3760.58	1261.34	1250.78	1184.75	1366.19	1052.81	1146.21	KCTD20
gene22869	2174.04	-1.06578	0.256231	-4.15945	3.19e-05	0.000523571	1036.65	1597.86	1137.79	2570.72	2703.19	1831.87	2987.91	2621.22	3079.14	STK38
gene22874	2771.42	1.74662	0.282021	6.19324	5.89e-10	5.54e-08	5690.58	4049.41	5888.73	1720.6	1456.72	935.095	1833.99	1799.16	1568.49	CDKN1A
gene22881	2871.39	1.55663	0.285581	5.45073	5.02e-08	2.32e-06	5184.24	4631.21	5568.23	1975.47	1971.05	960.279	1997.97	1954.2	1599.9	MTCH1
gene22884	590.105	1.6206	0.306703	5.28393	1.26e-07	5.07e-06	812.94	1049.47	1356.8	508.117	341.807	250.746	351.104	265.607	374.356	PIM1
gene22897	4521.47	-1.18405	0.349502	-3.38783	0.00070447	0.00607871	2545.68	2893.23	1900.59	5753.78	6198.9	2415.48	6256.49	6756.76	5972.35	BTBD9
gene22907	70.2914	-2.03939	0.378629	-5.38626	7.19e-08	3.14e-06	19.974	34.3327	13.8885	79.8005	85.1823	106.211	65.3919	112.973	114.869	KIF6
gene2291	43.9142	-3.03254	0.773008	-3.92304	8.74e-05	0.00117456	8.98828	8.35121	5.34174	41.5288	21.5651	12.0445	54.3256	180.276	62.8059	GHSR
gene22916	82.6763	1.82376	0.385212	4.73443	2.2e-06	5.59e-05	194.746	151.25	129.27	54.5575	51.7563	47.0832	60.3617	36.0553	19.0071	UNC5CL
gene22940	1293.9	1.513	0.262321	5.76773	8.03e-09	4.97e-07	2126.23	2265.03	2457.2	967.377	738.606	607.702	927.559	574.481	980.929	C20H6orf132
gene22961	1105.21	2.44671	0.276155	8.85991	8.01e-19	6.46e-16	1868.56	2468.25	2941.16	482.874	403.268	479.592	580.479	300.461	422.287	CUL7
gene22965	3390.45	1.25895	0.224087	5.6181	1.93e-08	1.01e-06	6039.13	5642.63	4941.11	2645.63	1880.48	2729.73	2656.92	1955.4	2023.01	PTK7
gene22966	389.262	1.51162	0.225416	6.70589	2e-11	2.86e-09	556.275	787.797	715.793	295.587	245.842	198.188	243.459	219.937	240.481	SRF
gene22981	698.214	1.27391	0.200429	6.3559	2.07e-10	2.24e-08	951.759	1229.48	1258.51	490.203	461.494	540.91	491.948	389.397	470.218	GTPBP2
gene2299	1601.93	-1.64411	0.40089	-4.10114	4.11e-05	0.000642655	823.926	587.368	576.908	2648.89	2530.67	1688.43	954.721	3166.86	1439.58	RPL22L1
gene22992	889.958	1.38074	0.312978	4.4116	1.03e-05	0.000204501	1966.44	1055.96	1507.44	574.889	614.606	694.204	713.275	532.416	350.391	SLC29A1
gene22994	17337.5	1.36728	0.373849	3.6573	0.000254888	0.0027318	37036.7	23268.3	27591.1	12619.1	15433.1	16690.5	9605.56	7268.75	6524.38	HSP90AB1
gene23012	675.93	-1.1903	0.346389	-3.4363	0.000589717	0.00533208	311.594	419.416	362.17	618.047	1073.94	1185.84	464.785	705.482	942.089	RCAN2
gene23022	177.209	-2.76378	0.779025	-3.54775	0.00038854	0.00385098	54.9284	28.7653	25.6403	147.387	800.066	26.279	123.742	194.699	193.376	ADGRF1
gene23029	35.5582	-2.12202	0.499943	-4.24453	2.19e-05	0.000382975	12.9831	10.207	9.61513	35.8288	58.2259	44.8933	48.2894	79.3216	20.6598	PTCHD4
gene23048	25.7568	-1.78703	0.544121	-3.28425	0.00102253	0.00821579	6.99089	7.4233	14.9569	17.1001	28.0347	35.0387	22.1326	61.294	38.8405	PKHD1
gene23052	700.167	1.66371	0.503247	3.30595	0.000946553	0.00773178	1265.35	1299.08	1298.04	283.373	419.442	992.033	306.839	243.974	193.376	MCM3
gene23063	100.322	-1.55752	0.375045	-4.15289	3.28e-05	0.000535483	30.9596	59.3864	40.5972	118.072	146.643	63.5076	145.874	146.625	151.23	LOC101106291
gene23104	1032.71	1.66691	0.194103	8.58778	8.87e-18	5.83e-15	1820.63	1775.1	2106.78	662.018	693.319	590.183	595.569	564.866	485.919	PBX2
gene23109	1459.71	1.41187	0.310686	4.54436	5.51e-06	0.00012216	2938.17	1912.43	2649.5	1140.01	892.796	1380.74	841.04	706.684	675.99	PPT2
gene23125	461.474	-1.35088	0.420779	-3.21042	0.00132539	0.0099688	191.75	235.69	253.198	316.759	783.893	1022.69	444.665	337.718	566.906	CFB
gene23127	104.602	1.0409	0.310793	3.34919	0.000810481	0.00680819	177.768	160.529	138.885	64.329	97.0431	54.7479	112.675	68.5051	66.9379	ZBTB12
gene23147	739.25	2.01577	0.415622	4.85001	1.23e-06	3.44e-05	1931.48	1058.75	1461.5	521.146	199.477	425.939	512.069	356.947	185.939	LOC101119591
gene23157	3680.52	1.29415	0.397999	3.25164	0.00114743	0.00895259	6574.43	5509.01	6161.16	2060.97	2141.42	5124.41	2111.65	1615.28	1826.33	BAG6
gene23158	3899.91	1.8367	0.46098	3.98435	6.77e-05	0.000958232	7520.2	7441.85	7538.26	1530.05	1699.33	4876.95	1803.81	1075.65	1613.12	PRRC2A
gene2318	53.3018	-1.34631	0.380008	-3.54285	0.000395833	0.00391599	30.9596	29.6932	18.1619	79.8005	43.1303	70.0774	47.2834	69.7069	90.9033	LRRC34
gene23181	10098.7	2.12843	0.562777	3.78202	0.000155561	0.00183932	26730.2	12913.8	22718.4	4334.47	5232.78	11689.8	1979.87	3182.48	2106.48	PSORS1C2
gene23182	12725.2	2.76816	0.30839	8.97619	2.8e-19	2.49e-16	30666	22544.5	35323.8	4891.44	4678.56	4994.11	4866.16	4256.93	2305.64	CDSN
gene23193	4126.74	1.85955	0.236188	7.87319	3.46e-15	1.4e-12	8588.8	7460.41	7895.09	2525.93	2020.65	2776.82	2369.2	1872.47	1631.3	DDR1
gene23195	3984.55	1.46917	0.359588	4.0857	4.39e-05	0.000678575	8517.9	5462.62	6839.56	2573.16	2104.76	4224.35	2333.99	2436.14	1368.51	IER3
gene23201	592.51	1.04493	0.280781	3.72151	0.000198036	0.002237	948.763	891.723	867.498	471.474	408.659	616.462	476.858	277.626	373.53	DHX16
gene23223	148.49	2.08592	0.3831	5.44485	5.19e-08	2.38e-06	371.516	215.276	321.573	60.2575	115.373	91.9765	58.3497	38.459	63.6323	TRIM10
gene23227	2113.72	1.66216	0.283728	5.85828	4.68e-09	3.12e-07	3709.17	3644.84	4303.3	1446.99	1128.93	1597.54	1454.72	838.886	899.116	RNF39
gene23232	119.065	1.63777	0.42325	3.86951	0.000109055	0.00139423	140.816	253.32	258.54	77.3576	71.1649	27.374	112.675	60.0922	70.2434	ZFP57
gene2324	2775.68	-1.97165	0.536457	-3.67532	0.000237554	0.00259599	894.834	1085.66	843.994	3580.44	6188.11	615.367	3361.14	4049.01	4362.53	MECOM
gene2332	148.374	-2.4992	0.447084	-5.58999	2.27e-08	1.17e-06	38.9492	42.6839	26.7087	161.23	301.912	72.2673	212.272	248.782	230.564	LOC101114669
gene23370	296.897	-1.65633	0.312376	-5.30237	1.14e-07	4.69e-06	124.837	138.259	102.561	451.117	356.903	584.708	294.766	290.846	328.078	ZSCAN16
gene2340	13.5901	-3.92071	1.10267	-3.55567	0.000377019	0.00376977	0.998698	2.78374	0	6.51432	17.2521	40.5135	3.01809	39.6608	11.5695	WDR49
gene2342	6.04987	-4.6448	1.3624	-3.40927	0.000651374	0.00576625	0	0.927912	0	6.51432	4.31303	10.9496	4.02412	12.0184	15.7015	ZBBX
gene23554	47.7078	1.72355	0.468476	3.67907	0.000234087	0.002566	80.8946	103.926	83.3311	44.786	38.8172	12.0445	20.1206	13.2203	32.2293	LOC101111401
gene23564	12.978	2.3273	0.557358	4.17559	2.97e-05	0.000493737	30.9596	23.1978	29.9137	10.5858	5.39128	6.56975	4.02412	1.20184	4.95836	LOC101113108
gene23566	59.2783	1.47293	0.455273	3.23527	0.00121529	0.00934252	142.814	68.6655	98.288	49.6717	36.6607	49.2731	21.1266	50.4774	16.5279	LOC101112606
gene23595	1193.03	1.02404	0.245664	4.16847	3.07e-05	0.00050515	1785.67	1823.35	1804.44	925.034	899.266	898.961	1220.31	680.243	699.955	ALDH5A1
gene23625	579.284	1.32369	0.314933	4.2031	2.63e-05	0.000444439	1200.44	734.906	962.581	413.66	547.754	259.505	440.641	368.966	285.106	SOX4
gene23643	271.004	-1.2853	0.364418	-3.52699	0.00042031	0.00408307	143.813	155.889	115.382	316.759	503.546	153.294	349.092	326.901	374.356	CAP2
gene23648	4064.88	-2.09333	0.607408	-3.44634	0.000568242	0.0051801	1514.03	1643.33	679.469	7007.78	6104.01	601.132	5601.57	7236.3	6196.3	ATXN1
gene23650	134.354	-1.37894	0.275092	-5.01263	5.37e-07	1.71e-05	67.9115	74.233	52.349	128.658	163.895	166.434	214.284	193.497	147.924	GMPR
gene23684	44.0935	-1.92225	0.536519	-3.58282	0.000339903	0.00347295	13.9818	12.0629	20.2986	29.3145	58.2259	24.0891	53.3195	91.3401	94.2089	MAK
gene23705	37403.7	2.45521	0.367653	6.67806	2.42e-11	3.36e-09	71358	70174.3	105140	23754.5	12446.3	8212.19	19716.2	12985.9	12845.5	DSP
gene23708	407.162	-1.23619	0.307667	-4.01793	5.87e-05	0.000855978	268.65	210.636	162.389	471.474	381.703	440.173	679.07	394.205	656.156	CAGE1
gene23753	1985.76	1.41522	0.301073	4.70058	2.59e-06	6.45e-05	4206.52	2615.78	3389.87	1266.22	1072.87	1412.5	1244.46	1823.2	840.442	FOXC1
gene23778	57.8366	-2.07322	0.513884	-4.0344	5.47e-05	0.000811435	31.9583	15.7745	7.47843	87.9434	113.217	94.1665	43.2592	43.2663	83.4657	FAT3
gene23784	127.855	-1.30182	0.351619	-3.70235	0.000213612	0.00238724	59.9219	65.8817	68.3742	179.958	174.678	71.1723	160.965	173.065	196.682	LOC106991818
gene23806	303.733	-2.17045	0.615946	-3.52377	0.000425452	0.0041194	98.8711	97.4308	76.921	342.816	332.103	50.3681	350.098	777.592	607.399	GRM5
gene23829	49.8668	-1.27553	0.372724	-3.42219	0.00062119	0.00556003	30.9596	20.4141	25.6403	53.7432	44.2085	81.027	50.3014	54.0829	88.4241	CCDC83
gene23832	95.8251	1.84927	0.409235	4.51885	6.22e-06	0.000134649	147.807	174.447	231.831	34.2002	35.5825	91.9765	67.4039	44.4682	34.7085	CCDC89
gene23837	2508.41	-2.28341	0.580405	-3.93416	8.35e-05	0.00113	712.072	963.173	427.339	4653.67	2580.27	489.447	3600.58	4719.64	4429.47	DLG2
gene2386	458.828	-2.3842	0.562611	-4.23774	2.26e-05	0.000393544	82.8919	89.0795	189.097	235.33	457.181	1430.02	349.092	495.159	801.602	RARRES1
gene23870	363.858	1.02886	0.314207	3.27447	0.0010586	0.00843741	498.35	455.605	699.768	327.345	271.721	360.241	270.622	230.754	160.32	KCTD21
gene23871	627.313	2.81294	0.284334	9.89309	4.46e-23	7.2e-20	1110.55	1560.75	1723.24	201.944	301.912	186.143	222.332	180.276	158.668	LOC443104
gene23889	9.50744	-4.39445	1.18918	-3.69536	0.000219575	0.00244006	0.998698	0.927912	0	5.70003	9.70431	17.5193	8.04823	22.835	19.8334	LOC101117804
gene23919	1952.48	-1.50166	0.419208	-3.58215	0.000340781	0.00347993	927.791	1222.06	487.166	2930.63	2519.89	1057.73	2633.78	2201.78	3591.51	LOC105604169
gene23943	165.712	-3.1568	0.903556	-3.49375	0.00047629	0.00451814	17.9766	33.4048	27.777	602.575	28.0347	50.3681	167.001	531.215	33.0557	LOC105604171
gene2399	326.79	-1.35801	0.391629	-3.4676	0.000525126	0.00489255	181.763	176.303	121.792	348.516	506.781	177.383	349.092	598.518	480.961	LEKR1
gene24	46.5154	1.54356	0.464057	3.32622	0.000880321	0.0072812	90.8815	88.1516	69.4426	12.2144	28.0347	20.8042	47.2834	18.0276	43.7989	KIF1A
gene24051	35.9948	-1.41478	0.431916	-3.27559	0.0010544	0.00841155	21.9714	21.342	7.47843	30.943	50.6781	42.7034	62.3738	49.2756	37.1877	VSIG2
gene24058	1031.95	1.37517	0.336675	4.08456	4.42e-05	0.00068132	1799.65	1403	2041.61	916.891	417.285	640.551	807.841	826.868	433.857	SLC37A2
gene24060	1104.43	-1.45939	0.449301	-3.24813	0.00116165	0.00902786	549.284	712.636	267.087	1768.64	1714.43	490.542	1552.3	1632.1	1252.81	PKNOX2
gene24083	2519.76	1.17745	0.292953	4.01926	5.84e-05	0.000852592	3992.8	3587.31	4455.01	1633.47	2167.3	2562.2	1700.19	1249.92	1329.67	SRPRA
gene24095	628.388	-1.28515	0.355107	-3.61906	0.00029567	0.00310035	205.732	361.886	395.289	686.447	1201.18	620.842	626.756	564.866	992.499	FLI1
gene24111	43.0387	-1.45277	0.385275	-3.77073	0.000162772	0.00190541	24.9675	15.7745	19.2303	43.9717	40.9737	45.9883	51.3075	62.4958	82.6394	OPCML
gene24120	1348.88	1.38166	0.311994	4.42849	9.49e-06	0.000191927	2468.78	2245.55	2153.79	974.706	549.911	1310.67	1001	772.785	662.768	ST14
gene24128	59.9382	-2.28027	0.492399	-4.63094	3.64e-06	8.52e-05	11.9844	22.2699	16.0252	46.4146	56.0693	127.015	83.5004	48.0737	128.091	MS4A8
gene24132	196.93	1.56594	0.43208	3.62419	0.000289866	0.00304943	318.585	376.732	362.17	83.8719	127.234	248.556	93.5607	62.4958	99.1672	CCDC86
gene24135	947.112	1.88566	0.353937	5.32766	9.95e-08	4.16e-06	2007.38	1703.65	1819.4	492.646	586.572	828.884	440.641	281.231	363.613	PRPF19
gene24137	2866.16	1.23969	0.336662	3.68229	0.000231151	0.00254166	5694.58	3271.82	4999.87	1683.95	1819.02	3073.55	2310.85	1636.91	1304.88	TMEM109
gene2414	36.9633	-2.12035	0.510825	-4.15084	3.31e-05	0.000539181	13.9818	6.49538	13.8885	47.2289	37.739	32.8488	40.2412	99.753	40.4933	PLCH1
gene24152	73.5781	-2.22636	0.443368	-5.02146	5.13e-07	1.64e-05	30.9596	24.1257	8.54678	98.5292	97.0431	157.674	81.4883	98.5511	65.2851	PAG11
gene24210	2240.32	1.55767	0.328528	4.74136	2.12e-06	5.44e-05	4110.64	3413.79	4481.72	1435.59	1290.67	2176.78	1354.11	798.024	1101.58	DDB1
gene24227	157.536	2.67175	0.381992	6.99425	2.67e-12	4.83e-10	325.576	521.487	231.831	48.8574	91.6518	35.0387	56.3376	51.6793	55.3684	FADS2
gene24235	188.961	-9.63164	1.56078	-6.17104	6.78e-10	6.24e-08	0	0.927912	0	479.617	115.373	5.47479	71.4281	848.501	179.327	LOC101110099
gene24236	162.385	-4.01459	1.07583	-3.73161	0.000190261	0.00215889	18.9753	12.0629	12.8202	92.0148	63.6171	0	413.478	414.636	433.857	LOC101110371
gene24242	1359.97	1.18304	0.342706	3.45207	0.000556311	0.00510541	2044.34	2276.17	2186.91	964.12	878.779	1702.66	823.938	627.362	735.49	MTA2
gene24246	1840.95	1.1813	0.192879	6.12456	9.09e-10	8.03e-08	2719.46	3116.86	2968.94	1438.04	1235.68	1357.75	1342.04	991.521	1398.26	GANAB
gene24255	2031.46	1.64673	0.29018	5.67486	1.39e-08	7.85e-07	3686.19	3328.42	4143.05	1331.37	1560.24	932.905	1418.5	737.932	1144.56	HNRNPUL2
gene24258	25.6724	2.88514	0.556896	5.18076	2.21e-07	8.09e-06	47.9375	59.3864	74.7843	10.5858	7.5478	0	8.04823	12.0184	10.7431	ZBTB3
gene24261	296.194	1.341	0.2464	5.44239	5.26e-08	2.4e-06	533.305	409.209	546.994	186.473	208.104	153.294	253.519	207.919	166.931	TMEM179B
gene24291	75.986	2.03059	0.441809	4.59609	4.3e-06	9.86e-05	101.867	216.203	141.022	30.1288	38.8172	49.2731	60.3617	15.624	30.5766	C21H11orf95
gene24294	670.693	1.06995	0.321601	3.32694	0.000878043	0.00726913	1443.12	834.193	814.081	553.718	541.285	290.164	603.617	515.591	440.468	LOC106991822
gene24302	2141.25	1.20739	0.369588	3.26684	0.00108754	0.0086025	3240.78	3488.95	3597.13	1547.15	1587.19	2604.91	1375.24	820.859	1009.03	STIP1
gene24318	126.916	1.20571	0.343157	3.51359	0.000442101	0.0042575	156.796	250.536	205.123	127.029	104.591	56.9379	95.5728	58.8903	86.7713	RPS6KA4
gene24328	1116.58	1.14363	0.272681	4.19403	2.74e-05	0.00046034	1950.46	1559.82	1763.84	773.576	709.493	1170.51	857.137	685.051	579.302	MAP4K2
gene24330	2668.26	1.8147	0.276463	6.564	5.24e-11	6.33e-09	5174.26	4920.72	5215.67	1830.53	1103.06	1564.7	1944.65	1152.57	1108.19	CDC42BPG
gene24350	870.76	1.25567	0.262823	4.77763	1.77e-06	4.65e-05	1361.23	1197.93	1705.08	496.717	665.284	806.985	623.738	507.178	472.697	MRPL49
gene24362	1077.31	1.00247	0.210828	4.75489	1.99e-06	5.12e-05	1586.93	1538.48	1727.52	913.634	655.58	924.145	878.263	648.995	822.262	FRMD8
gene24370	1360.91	1.21608	0.374509	3.24713	0.00116575	0.00905176	2607.6	1879.95	2093.96	924.22	831.336	1799.02	776.654	711.491	623.927	MAP3K11
gene24379	495.865	1.79767	0.288472	6.23168	4.61e-10	4.5e-08	706.08	1033.69	1093.99	328.973	235.06	320.823	310.863	175.469	257.835	OVOL1
gene24383	4695.86	1.47532	0.389988	3.78299	0.000154956	0.00183817	8736.61	7006.66	8837.37	1862.28	3390.04	5573.34	2657.93	2170.53	2027.97	CFL1
gene24397	55990.2	2.0329	0.553083	3.67558	0.000237309	0.00259491	169113	61098.4	108274	30982.1	15016.9	11641.6	40435.3	53841.4	13509.9	CST6
gene24402	135.291	1.53466	0.278351	5.51341	3.52e-08	1.69e-06	213.721	271.878	235.036	114.815	95.9648	66.7925	76.4582	79.3216	63.6323	KLC2
gene24406	62.0915	2.21232	0.598102	3.6989	0.000216539	0.00241085	128.832	79.8004	181.619	46.4146	7.5478	20.8042	30.1809	52.8811	10.7431	TMEM151A
gene24408	267.179	1.33727	0.314998	4.24533	2.18e-05	0.00038225	507.339	486.226	348.281	186.473	156.347	262.79	199.194	140.616	117.348	RIN1
gene24410	178.375	1.36574	0.392564	3.47904	0.000503221	0.00472315	319.583	242.185	341.871	112.372	117.53	224.467	89.5366	79.3216	78.5074	B4GAT1
gene24422	2052.84	1.39168	0.392239	3.54803	0.000388119	0.0038504	4421.24	2424.63	3637.72	1134.31	1438.39	2460.37	970.818	1152.57	835.484	CTSF
gene24430	3896.96	2.60341	0.39172	6.64611	3.01e-11	4.02e-09	7973.61	7526.29	10889.7	2183.93	859.37	976.703	2171.01	969.887	1522.22	LOC101106728
gene24446	167.494	-2.21824	0.468142	-4.7384	2.15e-06	5.5e-05	44.9414	73.305	27.777	132.729	200.556	340.532	190.139	132.203	365.266	CLCF1
gene24453	814.342	1.3638	0.34049	4.00541	6.19e-05	0.000893101	1626.88	1236.91	1259.58	417.731	517.563	928.525	487.924	503.572	350.391	CORO1B
gene24466	1469.2	2.18622	0.531248	4.11525	3.87e-05	0.00061149	2870.26	2069.24	4246.68	762.99	398.955	180.668	1291.74	819.657	582.607	LOC101111922
gene24476	1111.01	1.01901	0.245085	4.15778	3.21e-05	0.000526444	1487.06	1789.01	1756.36	931.548	982.292	779.611	982.89	699.473	590.871	LRP5
gene24491	4310.97	1.37189	0.291636	4.70411	2.55e-06	6.35e-05	10019.9	5132.28	6733.79	2571.53	3145.27	2275.32	3791.72	2529.88	2599.01	CCND1
gene24509	2514.11	2.07379	0.271837	7.62881	2.37e-14	7.79e-12	5802.44	3759.9	5777.62	1499.11	856.136	1108.1	1307.84	1424.18	1091.67	DHCR7
gene24518	1065.9	-1.82707	0.494493	-3.69485	0.000220018	0.00244193	441.425	574.378	168.799	1273.55	1880.48	467.547	1198.18	1837.62	1751.13	KCNQ1
gene24535	3003.89	3.07057	0.462961	6.63246	3.3e-11	4.28e-09	9754.29	4454.91	7626.93	686.447	719.197	1912.89	717.299	516.793	646.24	KRTAP5.4
gene24537	187.791	2.0845	0.271712	7.67173	1.7e-14	5.8e-12	337.56	377.66	433.749	73.2861	115.373	84.3118	94.5667	63.6977	109.91	DUSP8
gene24540	225.725	1.96235	0.369501	5.3108	1.09e-07	4.53e-06	494.356	369.309	478.62	90.3863	169.286	72.2673	178.067	94.9456	84.2921	CD151
gene24543	141.197	2.36265	0.331435	7.12855	1.01e-12	2.07e-10	299.609	329.409	287.385	83.0576	43.1303	40.5135	72.4341	40.8627	74.3754	SLC25A22
gene24547	521.597	1.604	0.46075	3.48128	0.000499022	0.00469366	1053.63	1060.6	717.929	513.817	197.321	129.205	499.996	223.543	298.328	EPS8L2
gene24571	118.222	2.02562	0.337143	6.00818	1.88e-09	1.43e-07	205.732	303.427	204.054	46.4146	60.3824	94.1665	52.3135	39.6608	57.8475	ATHL1
gene24611	4119.02	-2.79528	0.543836	-5.13993	2.75e-07	9.68e-06	849.892	953.893	686.947	5879.99	7937.05	836.549	6411.42	6072.91	7442.5	PRKG1
gene24629	52.3476	-2.93098	0.881788	-3.32391	0.000887661	0.00733167	9.98698	16.7024	2.13669	81.4291	19.4086	13.1395	48.2894	240.369	39.6669	LOC101123254
gene2465	346.005	-2.30847	0.464857	-4.96598	6.84e-07	2.11e-05	115.849	93.7191	75.8527	723.09	597.354	238.701	283.7	727.115	258.661	TM4SF18
gene2467	3800.38	-5.01821	0.855335	-5.86696	4.44e-09	2.99e-07	34.9544	149.394	335.461	9400.17	11221.4	222.277	3868.18	5582.56	3389.04	LOC101121993
gene24670	129.89	-1.20353	0.340007	-3.53971	0.000400566	0.00395181	59.9219	62.1701	86.5361	135.172	199.477	232.131	157.947	100.955	134.702	HHEX
gene2468	73.688	-3.05295	0.742582	-4.11127	3.93e-05	0.000620015	11.9844	13.9187	11.7518	166.93	106.747	7.66471	97.5848	199.506	47.1044	CP
gene24680	70.4223	-2.9151	0.620795	-4.69576	2.66e-06	6.54e-05	11.9844	17.6303	9.61513	19.543	145.565	123.73	56.3376	163.451	85.9449	PDE6C
gene24686	593.246	-1.76028	0.443609	-3.96808	7.25e-05	0.00100913	238.689	251.464	196.576	679.933	1052.38	262.79	759.552	617.747	1280.08	PLCE1
gene24696	58.9014	-3.68738	0.62567	-5.89349	3.78e-09	2.62e-07	8.98828	6.49538	4.27339	30.1288	134.782	40.5135	110.663	63.6977	130.57	LOC101106985
gene24728	1083.77	1.42152	0.375794	3.78271	0.000155132	0.00183817	1965.44	1551.47	2067.25	691.333	607.058	1336.94	533.195	498.765	502.447	PI4K2A
gene24736	224.887	1.96361	0.287681	6.82565	8.75e-12	1.34e-09	459.401	487.154	392.084	126.215	134.782	90.8816	74.4461	106.964	152.056	GOLGA7B
gene24743	947.123	-2.61524	0.523343	-4.99718	5.82e-07	1.83e-05	239.688	250.536	152.774	1048.81	2042.22	257.315	1412.46	1531.15	1589.15	HPSE2
gene24753	80.9598	-1.79305	0.503158	-3.5636	0.000365802	0.00368249	30.9596	35.2607	25.6403	80.6148	83.0258	31.7538	129.778	129.799	181.807	ABCC2
gene24760	770.459	-1.0327	0.216277	-4.77487	1.8e-06	4.7e-05	458.402	525.198	378.195	1053.69	855.057	809.175	826.956	924.217	1103.24	CWF19L1
gene24770	684.257	1.07372	0.194207	5.52875	3.23e-08	1.57e-06	994.703	1005.86	1158.09	593.618	459.337	457.693	568.406	460.306	460.301	HIF1AN
gene24778	1246.56	1.44582	0.320059	4.51734	6.26e-06	0.000135376	2263.05	1979.24	2226.44	679.118	845.353	1326	706.232	662.216	531.371	LZTS2
gene24791	1063.47	-1.17787	0.237184	-4.96608	6.83e-07	2.11e-05	666.132	570.666	495.713	1351.72	1176.38	961.374	1550.29	1264.34	1534.61	FBXW4
gene2480	33.9655	1.73894	0.453871	3.83135	0.000127442	0.00157051	65.9141	60.3143	65.1692	25.243	31.2694	5.47479	16.0965	18.0276	18.1807	LOC101104036
gene24813	1540.92	1.46244	0.325149	4.49774	6.87e-06	0.000145713	2308.99	2575.88	3151.62	1101.74	1079.33	455.503	1156.93	1001.14	1037.12	ACTR1A
gene24819	38.6783	3.43596	0.577443	5.9503	2.68e-09	1.98e-07	101.867	108.566	83.3311	12.2144	6.46954	21.8992	8.04823	2.40369	3.30557	CYP17
gene2482	27.7969	-1.78554	0.459125	-3.88901	0.000100655	0.00130851	14.9805	11.1349	5.34174	39.0859	39.8955	29.5639	27.1628	54.0829	28.9238	LOC106990808
gene24822	378.121	-1.37464	0.406609	-3.38073	0.000722932	0.00620785	167.781	242.185	139.954	563.489	532.659	175.193	506.033	636.977	438.815	CNNM2
gene2484	20.9439	5.12776	0.698827	7.33766	2.17e-13	5.76e-11	57.9245	49.1793	70.5109	0	3.23477	0	2.01206	4.80737	0.826394	ZIC1
gene24841	6808.99	2.28941	0.334249	6.84942	7.41e-12	1.16e-09	17483.2	10336	15670.5	4172.42	1923.61	2779.01	4017.07	2400.08	2499.01	COL17A1
gene24848	393.309	1.06675	0.245091	4.35246	1.35e-05	0.000258648	517.326	563.243	730.75	359.916	321.32	292.354	286.718	236.763	231.39	ITPRIP
gene24851	49.1467	-2.11233	0.53055	-3.9814	6.85e-05	0.000966326	11.9844	25.9815	7.47843	40.7145	91.6518	64.6026	49.2954	111.771	38.8405	SORCS3
gene24852	139.983	-2.21438	0.490942	-4.51046	6.47e-06	0.000139066	24.9675	69.5934	27.777	162.858	184.382	79.932	217.302	168.258	324.773	SORCS1
gene2486	14.1435	3.46226	0.912411	3.79463	0.000147863	0.00177896	33.9557	63.098	10.6835	0	0	3.28488	4.02412	4.80737	7.43754	ZIC4
gene24893	1173.91	1.37642	0.242954	5.66535	1.47e-08	8.22e-07	1914.5	1875.31	2179.43	959.234	753.701	537.625	750.498	685.051	909.859	AFAP1L2
gene24905	257.253	-1.62674	0.417116	-3.89997	9.62e-05	0.00126362	59.9219	113.205	149.569	359.102	572.554	313.158	300.803	253.589	193.376	PNLIPRP3
gene24911	58.5803	-1.46235	0.436873	-3.34732	0.000815973	0.00683893	26.9649	30.6211	23.5036	146.572	49.5998	54.7479	68.41	67.3032	59.5003	ENO4
gene24929	6702.97	1.26133	0.223518	5.64306	1.67e-08	9.13e-07	12247	8714.02	11927	4828.74	5705.06	3840.02	4733.37	4125.93	4205.52	EIF3A
gene24933	2044.02	-1.93938	0.431895	-4.4904	7.11e-06	0.000150465	690.1	961.317	470.073	3297.88	3051.47	938.38	2564.37	2544.3	3878.26	GRK5
gene25009	26.8147	-1.75788	0.434154	-4.04898	5.14e-05	0.000772946	6.99089	9.27912	14.9569	30.1288	40.9737	45.9883	26.1568	28.8442	38.0141	C22H10orf90
gene25017	1145.66	2.38274	0.30515	7.80843	5.79e-15	2.24e-12	2046.33	2830.13	2576.85	668.533	617.841	327.393	370.219	468.719	404.933	MKI67
gene25020	390.722	-1.81842	0.466159	-3.90085	9.59e-05	0.00125994	95.875	227.338	113.245	518.703	640.484	168.624	683.094	441.076	628.059	EBF3
gene25048	35.2062	2.84689	0.659174	4.31887	1.57e-05	0.000294402	109.857	87.2237	50.2123	2.44287	12.9391	29.5639	12.0723	8.4129	4.13197	SPRN
gene25082	110.769	-2.52127	0.651823	-3.86802	0.00010972	0.00139872	31.9583	29.6932	18.1619	87.1291	85.1823	28.4689	353.116	170.662	192.55	LOC106991863
gene25120	94.8529	-2.13698	0.423784	-5.04263	4.59e-07	1.5e-05	24.9675	43.6119	18.1619	92.8291	155.269	73.3622	156.941	180.276	108.258	DOK6
gene25121	102.974	-2.01064	0.585533	-3.43386	0.000595057	0.00536942	32.957	36.1886	33.1188	85.5005	347.199	43.7984	88.5305	105.762	153.709	CCDC102B
gene25147	59.1157	-1.88085	0.544209	-3.45612	0.000548009	0.00504487	20.9727	21.342	21.3669	35.0145	85.1823	88.6917	61.3678	33.6516	164.452	CELF4
gene25159	12.2413	3.83019	0.760568	5.03595	4.75e-07	1.54e-05	19.974	14.8466	61.9642	3.25716	3.23477	0	2.01206	2.40369	2.47918	LOC106991865
gene25179	23.5386	-2.33659	0.487458	-4.79342	1.64e-06	4.37e-05	4.99349	5.56747	8.54678	23.6144	31.2694	29.5639	27.1628	48.0737	33.0557	NOL4
gene2518	1476.53	-1.504	0.367508	-4.09243	4.27e-05	0.000661466	691.099	711.708	588.659	1959.18	2177	759.901	1694.15	2568.34	2138.71	TFDP2
gene25181	44.1477	-1.88504	0.557389	-3.38192	0.000719812	0.00618704	8.98828	30.6211	7.47843	48.0431	71.1649	27.374	41.2472	78.1198	84.2921	ASXL3
gene25182	25.5877	-2.86125	0.66635	-4.29392	1.76e-05	0.000323045	10.9857	3.71165	0	27.6859	38.8172	21.8992	31.1869	61.294	34.7085	CCDC178
gene25184	291.939	-1.75989	0.299742	-5.87136	4.32e-09	2.95e-07	92.8789	131.763	113.245	398.188	515.407	232.131	404.424	388.195	351.217	KLHL14
gene25217	174.164	-1.8163	0.433087	-4.19385	2.74e-05	0.00046034	77.8985	82.5842	34.1871	232.073	266.329	91.9765	209.254	274.02	299.154	PSMA8
gene25221	21.034	-1.78679	0.518679	-3.44489	0.000571295	0.00520375	9.98698	5.56747	8.54678	21.1716	31.2694	15.3294	23.1387	28.8442	45.4516	HRH4
gene25224	627.601	-1.49984	0.248267	-6.04123	1.53e-09	1.21e-07	314.59	299.716	233.968	793.933	679.302	1117.95	711.262	767.978	729.705	CABYR
gene25225	1017.27	-1.14647	0.265552	-4.3173	1.58e-05	0.000295043	529.31	644.899	512.807	1648.12	1307.93	859.543	1398.38	1023.97	1230.5	TTC39C
gene25254	1657.61	-1.02611	0.226514	-4.53	5.9e-06	0.000128833	1091.58	1111.64	737.16	2111.46	1859.99	2413.29	1740.43	1818.39	2034.58	THOC1
gene25271	40.8774	-1.62212	0.491593	-3.29972	0.00096781	0.00788004	19.974	18.5582	12.8202	34.2002	89.4953	47.0832	29.1748	37.2571	79.3338	MYOM1
gene25276	531.944	-1.26234	0.356999	-3.53596	0.000406289	0.00399274	215.719	353.534	256.403	648.99	704.102	293.449	792.751	752.354	770.199	DLGAP1
gene25298	3125.56	1.26412	0.279002	4.53087	5.87e-06	0.000128466	5836.39	4119.93	5393.02	2188	2689.17	1514.33	2732.37	1669.36	1987.48	RALBP1
gene25303	3960.02	1.20256	0.340553	3.5312	0.000413684	0.00404081	6434.61	5660.26	6974.17	3122.8	1963.51	4765.26	2537.21	2079.19	2103.17	APCDD1
gene25310	1290.63	1.23628	0.286337	4.31757	1.58e-05	0.000295043	2292.01	1815	2175.16	843.605	552.067	1115.76	1149.89	921.814	750.365	IMPA2
gene25333	173.886	-3.21217	0.457099	-7.0273	2.11e-12	3.9e-10	22.9701	32.4769	24.572	132.729	181.147	435.794	230.381	158.643	346.259	SLC14A2
gene25342	506.842	-1.10074	0.322653	-3.41154	0.000645972	0.00572986	330.569	307.139	224.353	513.817	486.294	1031.45	530.177	610.536	527.239	HAUS1
gene25346	21.1886	-1.88011	0.566795	-3.31709	0.000909603	0.00749546	13.9818	5.56747	3.20504	17.9144	19.4086	38.3236	22.1326	28.8442	41.3197	LOXHD1
gene2536	425.094	-2.65306	0.569313	-4.66011	3.16e-06	7.55e-05	122.84	64.9538	94.0146	716.576	741.841	78.837	670.015	707.886	628.885	CLSTN2
gene25369	437.509	-1.53336	0.326694	-4.69356	2.68e-06	6.59e-05	215.719	248.68	115.382	775.205	462.572	600.037	543.256	409.828	566.906	LOC101115926
gene25377	609.332	1.13028	0.290093	3.89626	9.77e-05	0.0012806	1080.59	997.505	787.372	425.874	392.485	643.836	491.948	317.287	347.085	CXXC1
gene25380	95.3396	-2.20272	0.631498	-3.48809	0.000486478	0.0045958	15.9792	44.5398	23.5036	100.158	98.1213	26.279	131.79	120.184	297.502	MAPK4
gene25392	240.119	-3.32279	0.354687	-9.36824	7.38e-21	8.19e-18	33.9557	49.1793	19.2303	365.616	365.529	251.841	354.122	455.499	266.099	DCC
gene25402	107.234	-1.41999	0.40966	-3.46626	0.000527751	0.0049067	51.9323	51.9631	48.0756	140.872	99.1996	56.9379	209.254	162.249	144.619	CCDC68
gene25443	1072.61	-1.58014	0.486904	-3.24528	0.00117334	0.00909905	326.574	728.411	327.983	1283.32	1237.84	572.663	1348.08	1042	2786.6	CCBE1
gene25454	87.0439	-1.66018	0.450294	-3.68689	0.000227015	0.00250393	18.9753	38.9723	49.144	108.301	118.608	43.7984	118.711	153.836	133.049	CDH20
gene25457	133.581	1.48684	0.367953	4.04084	5.33e-05	0.000794787	174.772	161.457	365.375	80.6148	80.8692	66.7925	60.3617	117.781	94.2089	RNF152
gene25460	411.753	-1.07156	0.265261	-4.03965	5.35e-05	0.000797492	214.72	308.067	189.097	456.817	586.572	377.761	536.213	453.095	583.434	TNFRSF11A
gene25472	1461.88	1.39207	0.431108	3.22905	0.00124202	0.00951087	1627.88	2434.84	3403.75	736.119	1018.95	1897.56	751.504	683.849	602.441	SERPINB12
gene25491	1523.22	-6.31765	0.94931	-6.65499	2.83e-11	3.84e-09	28.9622	14.8466	41.6655	1354.17	6718.62	1105.91	3224.32	28.8442	1191.66	LOC101108797
gene25519	227.928	1.79036	0.245205	7.30149	2.85e-13	7.22e-11	402.475	414.777	482.893	147.387	129.391	108.401	157.947	110.57	97.5144	JMJD8
gene25521	99.5727	1.89644	0.32192	5.89101	3.84e-09	2.64e-07	169.779	196.717	215.806	50.486	46.365	41.6084	71.4281	70.9087	33.0557	LOC105604843
gene25523	4.97919	4.33031	1.24862	3.46806	0.000524221	0.00488822	2.99609	19.4862	18.1619	0	2.15651	0	2.01206	0	0	METRN
gene25557	140.995	1.79616	0.34459	5.21245	1.86e-07	7.04e-06	283.63	306.211	215.806	91.2005	59.3041	107.306	93.5607	40.8627	71.0698	TELO2
gene25560	1401.84	1.5894	0.391697	4.05774	4.96e-05	0.000750788	2402.87	2407	2769.16	855.819	703.023	1668.72	694.16	558.857	556.989	HN1L
gene25588	164.456	1.20055	0.271729	4.41819	9.95e-06	0.000199268	316.587	223.627	251.062	105.858	127.234	158.769	100.603	88.9364	107.431	MLST8
gene25592	2718.66	1.50934	0.435673	3.4644	0.000531415	0.0049356	5881.33	2575.88	5914.37	1501.55	858.292	1653.39	3145.85	1439.81	1497.43	DNASE1L2
gene25595	93.951	-1.08477	0.32479	-3.3399	0.000838099	0.00699059	50.9336	71.4492	38.4605	99.3434	121.843	81.027	145.874	135.808	100.82	ABCA3
gene25640	108.714	1.31037	0.315509	4.15317	3.28e-05	0.000535483	206.731	155.889	179.482	67.5861	47.4433	97.4513	63.3798	61.294	99.1672	ZNF213
gene25677	100.673	-1.37087	0.33996	-4.03245	5.52e-05	0.000815481	45.9401	52.891	48.0756	114.815	136.939	72.2673	159.959	105.762	169.411	TIGD7
gene25680	508.721	-1.04972	0.311584	-3.36898	0.000754459	0.006435	261.659	283.013	346.145	687.261	555.302	963.564	572.43	444.682	464.433	ZNF75A
gene2569	103.078	-1.42273	0.418261	-3.40153	0.00067011	0.00587065	55.9271	56.6026	33.1188	103.415	152.034	55.8429	119.717	176.671	174.369	SLC35G2
gene25695	166.227	1.40848	0.334346	4.21264	2.52e-05	0.000428914	376.509	231.978	244.652	112.372	146.643	74.4572	138.832	93.7438	76.8546	TFAP4
gene25696	239.889	1.77054	0.322048	5.49775	3.85e-08	1.84e-06	393.487	499.217	467.936	109.929	226.434	111.686	136.82	109.368	104.126	GLIS2
gene25709	62.9898	-1.41684	0.385033	-3.6798	0.000233415	0.00256021	26.9649	32.4769	29.9137	69.2147	65.7736	136.87	82.4944	50.4774	72.7226	C24H16orf71
gene25717	9549.95	1.45239	0.428174	3.39205	0.000693726	0.00601229	17406.3	14653.6	17597.8	5827.88	5346	12606.3	5306.8	3067.1	4137.75	PPL
gene25729	116.877	-2.58612	0.377369	-6.85301	7.23e-12	1.14e-09	21.9714	18.5582	40.5972	162.858	134.782	157.674	137.826	251.185	126.438	RBFOX1
gene25732	399.634	1.26265	0.259864	4.85888	1.18e-06	3.32e-05	692.098	545.612	723.271	198.687	352.59	263.885	323.941	264.405	232.217	LOC105607580
gene25742	4159.91	1.0666	0.224873	4.7431	2.1e-06	5.4e-05	5781.46	6398.88	6972.04	3586.95	2821.8	3340.72	3498.97	2227.02	2811.39	USP7
gene25748	6196.82	1.6481	0.288282	5.71699	1.08e-08	6.44e-07	12515.7	8937.65	12592.6	3979.44	2674.08	3171	5070.39	4080.26	2750.24	EMP2
gene25754	601473	2.90543	0.401298	7.24007	4.48e-13	1.05e-10	1.21621e+06	1.40901e+06	1.64749e+06	174553	194382	374479	122961	158738	115435	CLEC16A
gene25764	47.4519	-1.73365	0.478808	-3.62076	0.000293734	0.00308282	21.9714	24.1257	9.61513	64.329	51.7563	25.1841	71.4281	66.1014	92.5561	LOC105604856
gene25765	28.1498	-2.24299	0.584624	-3.83664	0.000124728	0.00154724	6.99089	14.8466	2.13669	43.9717	53.9128	20.8042	24.1447	33.6516	52.8892	LOC106991887
gene25767	327.573	2.20817	0.437163	5.05113	4.39e-07	1.44e-05	505.341	618.917	933.736	176.701	175.756	44.8933	198.188	144.221	150.404	SNN
gene25778	617.32	-1.57862	0.411901	-3.83253	0.000126833	0.0015641	319.583	271.878	205.123	787.419	777.423	274.835	938.625	1140.55	840.442	CPPED1
gene25796	15.5148	-3.10607	0.933516	-3.32728	0.000876973	0.00726408	0.998698	6.49538	0	19.543	36.6607	3.28488	13.0784	24.0369	35.5349	PLA2G10
gene25826	38.2583	2.03461	0.53583	3.79712	0.000146389	0.00176722	35.9531	69.5934	126.065	20.3573	6.46954	19.7093	33.199	15.624	17.3543	ITPRIPL2
gene2583	739.373	-1.01143	0.29895	-3.38329	0.000716221	0.00615916	460.4	423.128	439.091	1025.19	1098.74	464.263	861.161	925.419	956.964	CEP63
gene25838	171.875	-1.08783	0.251489	-4.32555	1.52e-05	0.000287441	96.8737	114.133	83.3311	174.258	217.808	169.719	254.525	200.708	235.522	IQCK
gene259	146.663	1.95748	0.378124	5.17682	2.26e-07	8.25e-06	284.629	218.987	367.512	53.7432	95.9648	44.8933	121.73	69.7069	62.8059	PPCS
gene25953	319.43	1.20937	0.274187	4.41075	1.03e-05	0.000205077	456.405	579.945	505.328	238.587	177.912	262.79	301.809	169.46	182.633	SH2B1
gene25956	1261	1.27379	0.328759	3.87454	0.000106824	0.00137463	1690.8	2526.7	1994.6	993.434	899.266	546.384	1155.93	544.435	997.457	ATXN2L
gene25961	21.8434	-2.52637	0.560408	-4.5081	6.54e-06	0.000140118	1.9974	10.207	3.20504	18.7287	39.8955	31.7538	30.1809	30.0461	30.5766	IL27
gene25970	1128.99	1.3439	0.265062	5.07013	3.98e-07	1.33e-05	2078.29	1641.48	1962.55	564.303	761.249	1093.86	710.256	715.097	633.844	MAPK3
gene25986	535.606	-1.19189	0.306011	-3.89493	9.82e-05	0.00128446	237.69	383.228	244.652	651.432	516.485	562.809	757.54	520.398	946.221	KCTD13
gene25993	667.648	1.78662	0.257603	6.93556	4.05e-12	6.78e-10	1299.31	1245.26	1258.51	298.03	513.25	349.292	434.605	319.69	290.891	MAZ
gene25999	142.208	1.12935	0.285685	3.95314	7.71e-05	0.00105364	203.734	202.285	262.813	130.286	119.686	105.116	105.633	81.7253	68.5907	LOC101102954
gene26014	105.982	1.4131	0.336582	4.19839	2.69e-05	0.000452478	181.763	133.619	228.626	48.0431	70.0867	99.6413	68.41	75.7161	47.9308	LOC101122752
gene26020	2008.72	1.24702	0.235321	5.29923	1.16e-07	4.75e-06	3121.93	3477.81	3212.52	1441.29	1307.93	1078.53	1696.16	1082.86	1659.4	SRCAP
gene26024	1167.12	1.50383	0.39355	3.8212	0.000132807	0.00162984	1989.41	1943.98	2226.44	733.676	636.171	1417.97	602.611	402.617	551.204	RNF40
gene26036	308.962	1.66519	0.342422	4.86297	1.16e-06	3.28e-05	479.375	583.657	642.077	162.044	156.347	318.633	162.977	120.184	155.362	ZNF646
gene26043	1273.57	1.10645	0.260225	4.25191	2.12e-05	0.000374525	1873.56	2172.24	1896.32	623.747	931.614	1126.71	777.66	891.768	1168.52	FUS
gene26049	19.813	1.81417	0.499524	3.6318	0.00028145	0.00297322	26.9649	46.3956	40.5972	11.4001	8.62605	18.6143	6.03617	4.80737	14.8751	ITGAD
gene26082	186.85	-2.54801	0.636626	-4.00236	6.27e-05	0.000901034	56.9258	44.5398	30.9821	326.531	127.234	31.7538	368.207	300.461	395.016	CALN1
gene26108	6874.58	1.27139	0.352838	3.60332	0.000314179	0.00324701	10417.4	10379.6	13039.2	3972.11	4746.49	8482.65	3960.74	3830.27	3042.78	EIF4H
gene26114	2500.72	1.86701	0.500815	3.72796	0.000193039	0.00218483	6440.6	3124.28	4971.02	989.363	1032.97	3116.25	1145.87	1082.86	603.267	CLDN4
gene26120	26.3244	2.47042	0.390058	6.33346	2.4e-10	2.52e-08	54.9284	48.2514	71.5793	12.2144	9.70431	10.9496	10.0603	6.00922	13.2223	DNAJC30
gene26135	696.906	-2.5842	0.500407	-5.16418	2.41e-07	8.65e-06	194.746	108.566	179.482	738.562	671.754	2337.74	793.757	522.802	724.747	CCL26
gene2614	188.802	-1.60561	0.431902	-3.71752	0.000201185	0.00226546	69.9089	129.908	39.5289	219.044	250.156	128.11	280.682	352.14	229.737	CPNE4
gene26146	14177	1.92827	0.533909	3.61161	0.000304305	0.00316384	38358	18428.3	26854	3547.86	7534.86	17924.5	5999.96	5219.6	3726.21	HSPB1
gene26147	488.264	1.97312	0.495876	3.97906	6.92e-05	0.000974333	411.464	937.191	1562.99	267.087	308.381	81.027	319.917	231.956	274.363	YWHAG
gene26174	208.118	-1.85024	0.556231	-3.32638	0.000879817	0.00728043	115.849	56.6026	55.5541	173.444	194.086	698.584	145.874	262.002	171.063	IFT22
gene262	267.408	-1.79842	0.458493	-3.92245	8.77e-05	0.00117651	117.846	129.908	54.4857	350.145	436.694	128.11	267.604	498.765	423.113	LOC101102114
gene2620	1252.02	-1.74172	0.518338	-3.36021	0.000778836	0.00659573	596.223	574.378	294.864	1674.18	2002.32	319.728	1756.53	1848.43	2201.51	NEK11
gene26202	1223.5	1.43006	0.371455	3.84987	0.000118179	0.00148522	2251.07	1914.28	2154.86	688.89	782.814	1370.89	833.998	399.012	615.663	EPHB4
gene26219	148.946	1.97674	0.375821	5.2598	1.44e-07	5.67e-06	352.54	275.59	260.677	72.4719	86.2605	28.4689	97.5848	92.5419	74.3754	NYAP1
gene26227	37.025	1.85353	0.523065	3.54359	0.000394713	0.00390709	75.9011	54.7468	83.3311	11.4001	9.70431	45.9883	16.0965	22.835	13.2223	PVRIG
gene26256	46.2992	-1.50603	0.396823	-3.79523	0.000147505	0.00177808	24.9675	23.1978	13.8885	44.786	73.3214	88.6917	46.2773	55.2848	46.278	CYP3A24
gene26309	271.604	1.54851	0.299622	5.16823	2.36e-07	8.53e-06	448.415	528.91	474.346	118.072	171.443	229.941	191.146	106.964	175.195	LOC101106648
gene26322	1759.99	1.29394	0.304052	4.25564	2.08e-05	0.000370167	2542.69	3504.72	2677.28	1393.25	974.744	951.519	1751.5	824.464	1219.76	TNRC18
gene26329	468.688	1.31779	0.260285	5.06287	4.13e-07	1.37e-05	560.27	921.417	858.951	399.817	281.425	297.829	329.978	317.287	251.224	FOXK1
gene26336	1179.21	1.22943	0.277729	4.42673	9.57e-06	0.000193226	1561.96	1968.1	2197.59	759.733	728.901	1203.36	703.214	616.545	873.498	GNA12
gene26341	539.776	2.02897	0.302598	6.70516	2.01e-11	2.86e-09	902.823	1207.21	1150.61	278.487	322.399	316.443	292.754	141.817	245.439	TTYH3
gene26346	18.4662	3.31874	0.961968	3.44995	0.000560687	0.00513452	17.9766	7.4233	113.245	2.44287	2.15651	0	9.05426	4.80737	9.09033	LOC101112623
gene26354	1117.85	1.6008	0.473742	3.37907	0.000727321	0.00623649	2555.67	1739.83	1767.05	670.975	460.416	1497.9	602.611	431.462	334.689	TMEM184A
gene2636	60.9019	-2.89523	0.500929	-5.77972	7.48e-09	4.73e-07	13.9818	13.9187	6.41008	49.6717	76.5562	167.529	67.4039	73.3124	79.3338	DSCAM
gene26361	454.52	1.99572	0.285999	6.97807	2.99e-12	5.31e-10	1037.65	661.601	1024.55	191.358	297.599	193.808	274.646	236.763	172.716	LOC101120042
gene26390	316.644	-1.32872	0.381058	-3.48692	0.000488617	0.0046129	146.809	202.285	123.928	528.475	348.277	168.624	485.912	444.682	400.801	PGBD5
gene26442	14.9643	-4.00523	1.09485	-3.65823	0.000253963	0.00272664	0	0.927912	3.20504	4.88574	18.3304	63.5076	6.03617	20.4313	17.3543	TRIM67
gene26460	112.045	-1.12119	0.320609	-3.49707	0.000470406	0.00446948	73.9037	53.8189	60.8958	157.972	174.678	78.837	118.711	146.625	142.966	PCNXL2
gene26478	564.83	-1.18266	0.308147	-3.83797	0.000124056	0.00154379	346.548	315.49	255.335	558.603	609.215	1143.14	598.587	578.086	678.469	RBM34
gene26485	2021.32	1.83365	0.431039	4.25402	2.1e-05	0.000372111	3221.8	3213.36	5217.81	929.106	1787.75	1722.37	721.323	592.509	785.9	GNG4
gene26499	475.887	-2.46663	0.526772	-4.68255	2.83e-06	6.9e-05	142.814	150.322	61.9642	517.074	1025.42	154.389	674.039	788.409	768.546	RYR2
gene26519	914.331	1.76694	0.383052	4.61279	3.97e-06	9.2e-05	1458.1	2008.93	1715.77	399.002	519.72	955.899	335.008	334.112	502.447	RET
gene2652	8.74998	2.86724	0.740914	3.86987	0.000108892	0.00139316	25.9662	11.1349	24.572	2.44287	4.31303	0	1.00603	6.00922	3.30557	UMODL1
gene26552	22.789	-3.30389	0.942646	-3.50491	0.000456754	0.00437961	3.99479	3.71165	2.13669	35.8288	31.2694	0	41.2472	61.294	25.6182	LOC105605088
gene26554	105.114	2.35847	0.424313	5.55833	2.72e-08	1.37e-06	159.792	228.266	291.659	35.0145	76.5562	36.1336	38.2291	58.8903	21.4862	ADO
gene26565	529.694	-2.36837	0.543959	-4.35395	1.34e-05	0.000257514	214.72	156.817	49.144	863.962	835.649	217.897	630.78	1169.39	628.885	CTNNA3
gene26574	1109.95	-1.46389	0.43638	-3.35462	0.000794752	0.00670779	633.175	544.684	354.691	1249.12	1987.23	638.361	1216.29	2404.89	961.096	DNAJC12
gene26598	1349.89	-1.56765	0.388953	-4.03045	5.57e-05	0.000821091	468.389	465.812	819.422	856.634	1378.01	2112.18	1401.4	2358.02	2289.11	SRGN
gene26628	1556.17	1.83471	0.336565	5.45127	5e-08	2.32e-06	2685.5	2617.64	3671.91	1248.31	653.423	466.452	912.468	792.015	957.79	UNC5B
gene26637	411.546	1.00174	0.248783	4.02657	5.66e-05	0.000831293	716.067	574.378	563.019	254.873	346.12	327.393	277.664	242.772	401.627	SPOCK2
gene26664	538.761	-1.53315	0.385576	-3.97627	7e-05	0.000983497	217.716	377.66	118.587	789.048	529.424	486.162	794.763	669.427	866.06	MSS51
gene26694	154.41	2.14749	0.394163	5.44824	5.09e-08	2.35e-06	270.647	329.409	356.828	35.8288	91.6518	84.3118	115.693	54.0829	51.2364	ZNF503
gene26695	3104.49	-2.51731	0.554448	-4.5402	5.62e-06	0.000123976	873.861	1027.2	342.94	4864.57	5246.8	817.934	3786.69	4955.2	6025.24	C25H10orf11
gene26722	591.485	2.0679	0.220466	9.37969	6.62e-21	8.08e-18	1361.23	968.74	1273.47	295.587	284.66	329.583	279.676	306.47	223.953	MAT1A
gene26729	41.9584	-3.50257	0.662195	-5.28933	1.23e-07	4.97e-06	6.99089	3.71165	5.34174	74.1004	31.2694	20.8042	45.2713	63.6977	126.438	SH2D4B
gene26732	791.903	-1.82276	0.500347	-3.64299	0.000269494	0.00286224	256.665	375.804	249.993	1211.66	2266.5	418.274	827.962	930.227	590.045	NRG3
gene26763	740.421	-1.816	0.531131	-3.41912	0.00062823	0.00560092	396.483	208.78	223.285	346.073	755.858	2267.66	716.293	740.335	1009.03	ADIRF
gene26766	514.491	-1.29343	0.364236	-3.55108	0.000383654	0.00381677	266.652	270.022	247.857	537.432	639.406	274.835	714.281	806.437	873.498	FAM35A
gene26768	176.487	-1.37382	0.410997	-3.34265	0.000829818	0.00693455	103.865	104.854	48.0756	209.273	157.425	252.935	318.911	115.377	277.668	LOC101115343
gene26772	6923.33	1.2059	0.263355	4.57899	4.67e-06	0.000105831	12175.1	8483.9	12715.5	4606.44	3229.38	5435.38	5841	5145.09	4678.21	LOC101114082
gene26789	303.554	-2.07065	0.373634	-5.54193	2.99e-08	1.48e-06	85.888	124.34	80.1261	285.816	280.347	695.299	390.339	322.094	467.739	ARHGAP22
gene26799	81.0077	-4.14503	0.630806	-6.57101	5e-11	6.12e-09	3.99479	6.49538	9.61513	35.8288	78.7127	113.876	84.5064	177.873	218.168	CHAT
gene2680	190.131	2.6206	0.331148	7.91368	2.5e-15	1.06e-12	323.578	365.597	602.548	87.1291	53.9128	50.3681	91.5486	74.5143	61.9795	ICOSLG
gene26830	56.2388	-1.75194	0.413419	-4.2377	2.26e-05	0.000393544	23.9688	24.1257	17.0936	59.4432	104.591	40.5135	82.4944	98.5511	55.3684	DLGAP2
gene26839	272.486	-3.10287	0.396641	-7.82287	5.16e-15	2.04e-12	40.9466	58.4585	35.2555	462.517	331.025	189.428	554.322	477.132	303.286	CSMD1
gene26869	15.5281	-2.05369	0.62843	-3.26798	0.00108319	0.00857955	6.99089	2.78374	5.34174	11.4001	12.9391	25.1841	15.0904	22.835	37.1877	ASB5
gene26872	367.168	-1.54009	0.362373	-4.25001	2.14e-05	0.000375835	126.835	191.15	166.662	445.417	758.014	251.841	424.544	538.426	401.627	VEGFC
gene2690	799.014	3.26482	0.659029	4.95398	7.27e-07	2.21e-05	3075.99	1093.08	1783.07	91.2005	159.582	636.171	133.802	76.918	141.313	LOC106990811
gene2691	1015.52	3.04521	0.674322	4.51596	6.3e-06	0.000135909	3502.43	1505.07	2349.3	203.573	264.173	924.145	115.693	90.1382	185.112	LOC105604740
gene26919	171.682	-2.31988	0.652783	-3.55383	0.000379669	0.00378773	65.9141	21.342	53.4174	219.044	170.365	66.7925	212.272	628.564	107.431	ANKRD37
gene2692	1470.87	3.02649	0.508977	5.94622	2.74e-09	2.02e-07	4411.25	2718.78	3498.84	414.474	360.138	1022.69	275.652	168.258	367.745	LOC101108536
gene26922	22.3185	-1.87946	0.562569	-3.34085	0.000835228	0.00697319	14.9805	3.71165	5.34174	16.2858	32.3477	45.9883	29.1748	21.6332	31.403	CCDC110
gene26928	1446.42	-1.02083	0.284858	-3.58365	0.000338829	0.00346418	708.077	843.472	1022.41	1451.07	1459.96	1281.1	2051.29	1753.49	2446.95	LOC101116121
gene2693	687.36	3.22052	0.674517	4.77455	1.8e-06	4.7e-05	2886.24	722.843	1483.93	107.486	167.13	543.1	116.699	61.294	97.5144	LOC106990888
gene2694	514.852	3.21667	0.648347	4.96134	7e-07	2.14e-05	2224.1	656.034	932.667	87.9434	95.9648	408.42	90.5426	79.3216	58.6739	LOC101108798
gene26949	84.1596	-3.40486	0.450291	-7.56147	3.99e-14	1.22e-11	10.9857	8.35121	14.9569	83.8719	213.495	119.351	92.5547	97.3493	116.521	FGL1
gene2695	1398.73	3.2114	0.72476	4.43097	9.38e-06	0.000190382	4971.52	1841.91	3539.44	257.316	228.59	1260.3	162.977	87.7345	238.828	LOC105604734
gene26954	265.865	-1.79165	0.496036	-3.61193	0.000303932	0.00316182	92.8789	123.412	85.4678	248.359	363.372	118.256	262.574	717.5	380.967	MTMR7
gene2696	595.397	3.40032	0.691788	4.91527	8.87e-07	2.63e-05	1940.47	958.533	1605.73	48.8574	104.591	467.547	106.639	46.8719	79.3338	LOC106990889
gene26969	311.622	-3.24779	0.527172	-6.16078	7.24e-10	6.63e-08	16.9779	38.0444	85.4678	504.046	556.38	178.478	310.863	606.931	507.406	SGCZ
gene26974	5451.03	-1.9266	0.556228	-3.46368	0.00053284	0.00494288	1836.61	2283.59	1582.22	7147.84	9811.06	984.368	7055.28	8658.08	9700.21	DLC1
gene2698	2555.05	3.03342	0.583747	5.19647	2.03e-07	7.51e-06	8315.16	4193.23	5972.06	364.802	873.388	1996.11	511.063	334.112	435.509	LOC101104203
gene26987	1616.11	1.3964	0.335119	4.16688	3.09e-05	0.000508223	2266.05	2596.3	3402.69	1035.78	1018.95	1705.95	1055.32	802.831	661.115	PPP1R3B
gene2700	1291.51	2.61866	0.620166	4.22251	2.42e-05	0.000413324	3890.93	1531.98	3345	212.53	417.285	1346.8	368.207	180.276	330.557	LOC105604748
gene27002	1746.47	-2.1181	0.446476	-4.74404	2.09e-06	5.38e-05	510.335	721.916	391.015	1927.43	3065.48	939.475	2074.43	1918.14	4169.98	RBPMS
gene27019	1971.05	-2.58727	0.683936	-3.78291	0.000155008	0.00183817	391.49	586.44	384.605	1878.57	2793.76	202.567	2515.07	2975.76	6011.19	NRG1
gene27044	492.787	1.0304	0.259664	3.9682	7.24e-05	0.00100913	684.108	694.078	862.156	344.445	415.129	501.491	320.923	342.525	270.231	PROSC
gene27053	186.503	5.28055	0.694771	7.60043	2.95e-14	9.36e-12	784.977	310.851	501.055	27.6859	23.7216	0	9.05426	9.61474	11.5695	STAR
gene27066	47.8642	-1.68752	0.372796	-4.52666	5.99e-06	0.000130728	25.9662	14.8466	17.0936	49.6717	76.5562	48.1782	84.5064	55.2848	58.6739	HTRA4
gene27068	1817.97	-1.07111	0.240542	-4.45288	8.47e-06	0.000174542	949.762	1135.76	1059.8	1766.2	1886.95	2342.12	2119.7	2047.94	3053.52	ADAM9
gene27069	199.736	-1.6492	0.35899	-4.59398	4.35e-06	9.95e-05	122.84	84.44	39.5289	208.458	270.642	258.41	217.302	323.296	272.71	ADAM32
gene27076	13.9783	-3.33251	0.99423	-3.35185	0.000802741	0.00676237	4.99349	0.927912	0	13.8429	17.2521	10.9496	3.01809	38.459	36.3613	LOC101120301
gene27078	9.48	-3.76992	1.06074	-3.55406	0.000379334	0.00378652	0	0.927912	2.13669	13.8429	11.8608	32.8488	9.05426	7.21106	7.43754	IDO2
gene27121	131.069	-1.84775	0.476686	-3.87624	0.000106082	0.00136805	42.944	68.6655	32.0504	198.687	333.181	106.211	186.115	111.771	99.9936	LRRC3B
gene27136	6.07452	3.78835	0.93517	4.05098	5.1e-05	0.000769528	6.99089	20.4141	20.2986	0	1.07826	0	1.00603	2.40369	2.47918	LOC105601914
gene27139	284.433	-1.70929	0.403929	-4.23167	2.32e-05	0.000400705	128.832	163.313	47.0073	328.159	283.581	501.491	317.905	316.085	473.523	NKIRAS1
gene27150	622.641	-2.7346	0.442422	-6.18098	6.37e-10	5.95e-08	137.82	152.178	101.493	719.833	1283.13	393.09	742.449	580.49	1493.29	ZNF385D
gene27161	204.37	2.23324	0.253124	8.82273	1.12e-18	8.62e-16	339.557	509.424	442.296	109.929	74.3997	79.932	104.627	84.129	95.0353	AKAP17A
gene27165	331.123	2.06918	0.2771	7.46725	8.19e-14	2.35e-11	657.143	569.738	791.645	128.658	184.382	109.496	199.194	151.432	188.418	ZBED1
gene27171	321.888	1.35526	0.369431	3.66852	0.000243957	0.00264965	471.386	432.407	722.203	245.101	260.938	324.108	157.947	135.808	147.098	LOC101116287
gene27173	3265.13	1.89331	0.398151	4.75525	1.98e-06	5.12e-05	4750.81	6482.39	7868.38	1408.72	1302.53	3331.96	1808.84	1326.83	1105.71	MXRA5
gene2718	3362.84	1.8191	0.40953	4.44193	8.92e-06	0.000181358	5022.45	6496.31	7797.87	1150.59	2616.93	2911.5	1562.36	900.18	1807.32	COL6A2
gene27183	4018.83	-7.35929	0.951826	-7.73177	1.06e-14	3.77e-12	37.9505	33.4048	38.4605	135.987	15692.9	1627.11	1735.4	3504.57	13363.6	LOC101116281
gene27185	4032.75	-3.02516	0.763227	-3.96364	7.38e-05	0.0010185	1229.4	606.854	263.882	3084.53	13815.7	727.053	1847.07	7993.46	6726.84	LOC101116799
gene27217	1234.88	-1.65071	0.4795	-3.44257	0.000576217	0.00523935	469.388	716.348	340.803	1442.92	2056.24	433.604	1509.04	1789.54	2356.05	ARHGAP6
gene2722	1669.98	1.48785	0.385824	3.8563	0.000115117	0.00145142	3710.16	2333.7	2730.7	1294.72	519.72	944.949	1240.43	691.06	1564.36	LSS
gene27221	110.281	-2.35921	0.424422	-5.55863	2.72e-08	1.37e-06	37.9505	37.1165	12.8202	118.886	190.851	95.2614	148.892	133.405	217.341	FRMPD4
gene27238	144.43	-2.79451	0.704351	-3.9675	7.26e-05	0.00101024	50.9336	27.8374	8.54678	169.372	153.112	25.1841	367.201	191.093	306.592	GLRA2
gene27247	328.094	-1.61735	0.28047	-5.76657	8.09e-09	4.97e-07	136.822	178.159	98.288	422.617	319.164	512.441	368.207	491.554	425.593	ASB11
gene27276	273.427	-1.3445	0.364293	-3.6907	0.000223635	0.00247279	136.822	141.971	126.065	360.731	414.051	135.775	366.195	370.168	409.065	REPS2
gene27285	195.667	-1.35103	0.23938	-5.6439	1.66e-08	9.11e-07	93.8776	102.07	92.9462	280.116	230.747	211.327	258.549	194.699	296.675	RAI2
gene27288	14.8987	-2.82379	0.701437	-4.02572	5.68e-05	0.000832941	0.998698	5.56747	2.13669	12.2144	18.3304	35.0387	18.1085	14.4221	27.271	BEND2
gene27320	16.1682	-4.1391	0.999528	-4.14106	3.46e-05	0.000559119	2.99609	0	1.06835	7.32861	11.8608	32.8488	49.2954	12.0184	28.0974	SMPX
gene27323	636.037	-1.32736	0.258339	-5.13804	2.78e-07	9.76e-06	365.524	317.346	268.155	820.805	1052.38	558.429	767.6	729.519	844.574	SMS
gene27324	79.8263	-1.46031	0.405034	-3.60539	0.000311682	0.0032292	27.9635	24.1257	58.7591	123.772	107.826	111.686	52.3135	104.56	107.431	PHEX
gene27334	6724.64	-1.10602	0.255669	-4.326	1.52e-05	0.000287154	4266.44	3424	3717.85	7048.5	7141.29	10916.7	5935.57	9123.19	8948.19	SAT1
gene27349	3.74612	-4.92551	1.46873	-3.35359	0.000797709	0.00672636	0	0	0	4.07145	7.5478	1.09496	4.02412	12.0184	4.95836	LOC101116122
gene27363	407.796	-3.47586	0.425702	-8.165	3.21e-16	1.5e-13	57.9245	68.6655	30.9821	534.175	878.779	284.689	406.436	712.693	695.823	IL1RAPL1
gene27406	26.3441	-2.59972	0.668656	-3.88798	0.000101083	0.00131216	10.9857	2.78374	4.27339	18.7287	31.2694	64.6026	14.0844	56.4866	33.8821	CFAP47
gene27418	83.9199	-3.43852	0.558891	-6.1524	7.63e-10	6.91e-08	5.99219	18.5582	8.54678	92.8291	172.521	37.2286	160.965	145.423	113.216	LOC101119796
gene27425	159.742	-1.75462	0.476571	-3.68175	0.000231641	0.0025439	43.9427	96.5028	44.8706	234.516	296.521	102.926	97.5848	270.415	250.397	SYTL5
gene27429	363.454	1.64734	0.387573	4.2504	2.13e-05	0.000375835	456.405	832.337	707.246	165.301	347.199	295.639	148.892	147.827	170.237	SRPX
gene27438	1114.47	1.8767	0.258301	7.26556	3.72e-13	8.8e-11	2393.88	1601.58	2497.8	556.16	559.615	766.471	650.901	546.839	456.996	MID1IP1
gene27466	1019.97	-1.29604	0.307017	-4.22139	2.43e-05	0.000414983	555.276	480.658	517.08	882.691	1505.25	1656.67	932.589	984.309	1665.18	MAOA
gene27470	253.104	-1.41162	0.28517	-4.95009	7.42e-07	2.25e-05	121.841	133.619	104.698	320.016	383.859	198.188	292.754	399.012	323.946	EFHC2
gene27485	912.037	-1.4928	0.439217	-3.39878	0.000676876	0.00590662	475.38	437.047	325.846	1222.25	1154.81	323.013	1394.36	1441.01	1434.62	LOC101108987
gene27489	1399.05	-1.91879	0.54074	-3.54845	0.000387508	0.00384649	547.287	648.61	274.565	1710.01	2689.17	343.817	2166.99	1890.5	2320.51	ARHGEF9
gene27492	1211.63	-2.05143	0.512782	-4.00058	6.32e-05	0.000906349	429.44	447.254	297.001	1771.9	1877.24	285.784	2014.07	2025.11	1756.91	MTMR8
gene27495	159.521	-2.36814	0.331526	-7.14317	9.12e-13	1.95e-10	46.9388	53.8189	25.6403	235.33	217.808	154.389	179.073	276.424	246.265	ZC3H12B
gene27506	232.231	-1.76408	0.322351	-5.47253	4.44e-08	2.07e-06	56.9258	123.412	87.6045	261.387	384.938	215.707	291.748	322.094	346.259	VSIG4
gene27507	188.186	-2.06847	0.347228	-5.9571	2.57e-09	1.92e-07	35.9531	60.3143	84.3994	222.301	226.434	176.288	273.64	265.607	348.738	HEPH
gene27513	923.389	1.10568	0.270613	4.08584	4.39e-05	0.000678575	1308.29	1284.23	1714.7	671.79	686.849	947.139	666.997	526.407	504.1	UBQLN2
gene27514	434.883	-2.57746	0.354643	-7.26774	3.66e-13	8.77e-11	111.854	110.422	80.1261	545.575	642.641	278.12	665.991	685.051	794.164	KLF8
gene27518	26.3196	-3.32526	0.85333	-3.8968	9.75e-05	0.00127931	2.99609	0.927912	7.47843	28.5002	97.0431	16.4244	50.3014	8.4129	24.7918	ALAS2
gene27520	64.2654	-2.67871	0.698083	-3.83724	0.000124424	0.00154724	20.9727	17.6303	3.20504	42.3431	74.3997	102.926	65.3919	30.0461	221.473	PFKFB1
gene27521	6.43586	-4.72609	1.44203	-3.2774	0.00104768	0.0083692	0.998698	0	0	0.814291	16.1738	13.1395	12.0723	4.80737	9.91672	TRO
gene27546	2564.91	1.14744	0.307121	3.73613	0.000186873	0.0021286	3713.16	4045.7	4372.75	1977.1	1409.28	2860.03	1852.1	1205.45	1648.66	KDM5C
gene27570	1464.67	-1.22463	0.301712	-4.05895	4.93e-05	0.000748166	651.151	916.777	755.322	2073.18	1753.25	993.128	1725.34	2193.36	2120.53	CLCN5
gene27590	574.073	1.50668	0.289862	5.19792	2.02e-07	7.47e-06	780.982	1176.59	1075.83	427.503	335.338	260.6	442.653	254.791	412.37	TFE3
gene27592	73.135	1.49301	0.330616	4.51585	6.31e-06	0.000135909	121.841	130.836	132.475	52.9289	58.2259	21.8992	53.3195	42.0645	44.6252	KCND1
gene27615	256.324	1.20601	0.247888	4.86514	1.14e-06	3.25e-05	488.363	358.174	388.878	172.63	172.521	247.461	163.983	156.24	158.668	TBC1D25
gene27616	998.962	1.47572	0.333138	4.42976	9.43e-06	0.000191242	2470.78	998.433	1760.64	631.075	611.371	608.797	867.197	569.674	472.697	EBP
gene27635	553.174	1.00501	0.191913	5.23677	1.63e-07	6.32e-06	844.899	773.879	873.908	356.659	424.833	490.542	432.592	424.251	357.002	ELK1
gene27639	362.246	1.43233	0.361603	3.96105	7.46e-05	0.00102641	548.285	571.594	753.185	301.288	225.356	109.496	337.02	211.524	202.466	ARAF
gene2765	140.323	-2.39184	0.613158	-3.90086	9.59e-05	0.00125994	28.9622	74.233	6.41008	256.502	133.704	116.066	177.061	139.414	330.557	KCNJ6
gene27662	303.556	-1.86735	0.553306	-3.3749	0.00073843	0.00631649	131.828	150.322	47.0073	419.36	369.842	90.8816	498.99	372.571	651.198	LOC105605487
gene27670	7021.82	-2.37616	0.550411	-4.31706	1.58e-05	0.000295043	2171.17	2115.64	1264.92	12050.7	10501.1	1390.6	10535.1	10565.4	12601.7	OPHN1
gene27673	820.166	1.81182	0.33517	5.40568	6.46e-08	2.86e-06	1513.03	1431.77	1758.5	542.318	457.181	208.042	595.569	409.828	465.26	EFNB1
gene27678	663.31	-1.17017	0.299695	-3.90453	9.44e-05	0.00124925	399.479	418.488	267.087	822.433	1081.49	497.111	894.36	757.161	832.178	EDA
gene27697	1299.61	1.25793	0.199775	6.2967	3.04e-10	3.1e-08	2357.93	1754.68	2256.35	847.676	905.736	892.391	973.836	980.704	727.226	SNX12
gene27706	348.725	1.28377	0.266985	4.80841	1.52e-06	4.09e-05	525.315	644.899	553.404	276.044	201.634	277.025	288.73	157.441	214.036	ZMYM3
gene27707	1947.44	1.68879	0.412787	4.09118	4.29e-05	0.000664461	2575.64	3599.37	4641.97	1453.51	1484.76	418.274	1385.3	972.291	995.804	NONO
gene27714	523.197	-1.8785	0.422595	-4.44515	8.78e-06	0.000179481	187.755	299.716	75.8527	642.475	552.067	510.251	826.956	626.16	987.54	ACRC
gene27720	971.64	-1.1636	0.266451	-4.36704	1.26e-05	0.000245498	417.456	636.548	541.652	1064.28	1424.38	852.973	1270.61	1070.84	1466.02	NHSL2
gene27723	696.401	-1.26946	0.381121	-3.33085	0.000865807	0.00718978	552.28	278.374	245.72	631.889	887.405	1157.37	577.461	1209.05	728.053	PIN4
gene27728	1420.06	-1.76164	0.451528	-3.90151	9.56e-05	0.00125933	584.238	654.178	403.835	1751.54	2238.46	515.726	1794.76	2523.87	2313.9	HDAC8
gene27730	998.705	-1.27387	0.374853	-3.39831	0.000678039	0.00591254	456.405	654.178	429.476	1274.36	1595.82	533.245	1141.84	1200.64	1702.37	PHKA1
gene27742	7563.54	-1.37047	0.399591	-3.42967	0.000604314	0.00543914	3597.31	5515.51	1917.68	11093.9	9517.77	4555.03	10949.6	10131.5	10793.5	LOC101112542
gene27778	7.12412	-5.85994	1.35544	-4.32327	1.54e-05	0.000289495	0	0	0	3.25716	14.0173	7.66471	9.05426	14.4221	15.7015	LOC101106237
gene27801	7.8331	-4.10702	1.19444	-3.43845	0.000585051	0.00530609	0	0.927912	1.06835	4.88574	11.8608	15.3294	15.0904	4.80737	16.5279	LOC105605689
gene2781	291.062	1.66924	0.34985	4.77131	1.83e-06	4.77e-05	380.504	569.738	658.102	178.33	194.086	77.7421	194.164	198.304	168.584	EAF1
gene27813	13.2644	-6.76901	1.54182	-4.39028	1.13e-05	0.000222373	0	0	0	7.32861	11.8608	3.28488	10.0603	10.8166	76.0282	CYLC1
gene27820	113.266	-1.33636	0.363927	-3.67205	0.000240613	0.00262322	68.9102	40.8281	58.7591	114.815	197.321	81.027	159.959	175.469	122.306	LOC105605519
gene27831	1495.21	-1.32119	0.411115	-3.21368	0.00131045	0.00988991	724.056	737.69	782.03	1831.34	2347.36	602.227	1734.39	2586.37	2111.44	CHM
gene27832	88.4302	-2.57151	0.424365	-6.05967	1.36e-09	1.13e-07	26.9649	26.9094	7.47843	118.886	149.878	113.876	95.5728	167.056	89.2505	DACH2
gene27857	791.831	-1.34595	0.308438	-4.36377	1.28e-05	0.000248656	317.586	364.669	489.303	824.876	905.736	716.103	827.962	1320.83	1359.42	CLIC2
gene27880	1257.96	1.50369	0.374062	4.01989	5.82e-05	0.000851018	2538.69	1667.46	2432.63	679.933	682.536	1442.06	800.799	542.031	535.503	G6PD
gene27887	1074.19	1.12336	0.340323	3.30086	0.000963889	0.00785532	1428.14	1900.36	1712.56	960.049	743.997	411.705	1115.69	582.894	812.345	GDI1
gene27888	1717.39	1.75428	0.267958	6.54685	5.88e-11	6.96e-09	3766.09	2587.02	3350.34	1014.61	956.414	1237.3	1069.41	820.859	654.504	ATP6AP1
gene2789	89.8549	-1.67993	0.486697	-3.45169	0.000557078	0.00510981	17.9766	53.8189	37.3922	164.487	97.0431	61.3177	182.091	67.3032	127.265	GALNT15
gene27895	529.062	2.47962	0.417999	5.93213	2.99e-09	2.15e-07	697.091	1403.93	1403.81	204.387	162.817	381.046	217.302	109.368	181.807	LOC105605699
gene27908	159.144	1.50937	0.319783	4.71998	2.36e-06	5.92e-05	219.714	363.741	258.54	126.215	97.0431	73.3622	126.76	66.1014	100.82	HCFC1
gene27923	37.7192	2.39993	0.728866	3.2927	0.00099232	0.00801711	119.844	40.8281	85.4678	13.8429	18.3304	0	31.1869	19.2295	10.7431	ATP2B3
gene27924	5605.63	1.87171	0.581056	3.22123	0.00127643	0.00971159	12366.9	8984.04	11271.1	1746.65	2969.52	8317.31	1640.83	1933.77	1220.58	BGN
gene27982	1432.91	1.45709	0.351245	4.14835	3.35e-05	0.000543583	2035.35	2285.45	3140.94	1035.78	977.979	402.945	1098.58	847.299	1071.83	IDS
gene27985	405.964	-2.10204	0.466509	-4.50588	6.61e-06	0.000141077	85.888	153.105	142.09	603.389	707.336	155.484	530.177	794.418	481.787	AFF2
gene27986	9.55673	-3.80629	1.02806	-3.70241	0.000213559	0.00238724	0.998698	1.85582	0	5.70003	11.8608	15.3294	8.04823	24.0369	18.1807	FMR1NB
gene28	878.621	1.85405	0.396476	4.67631	2.92e-06	7.07e-05	2066.31	1235.98	1788.41	488.574	389.251	838.738	488.93	372.571	238.828	GPC1
gene28003	418.483	1.42967	0.351215	4.07065	4.69e-05	0.000717705	902.823	500.145	758.527	230.444	428.068	234.321	318.911	179.075	214.036	LDOC1
gene28004	41.6602	-2.43023	0.716999	-3.38945	0.000700342	0.0060578	8.98828	19.4862	3.20504	59.4432	65.7736	6.56975	64.3859	52.8811	94.2089	LOC106991993
gene28005	25.1491	-2.65861	0.665102	-3.9973	6.41e-05	0.000916065	5.99219	8.35121	2.13669	37.4574	35.5825	6.56975	38.2291	43.2663	48.7572	LOC101113919
gene28012	362.718	2.24787	0.490418	4.58359	4.57e-06	0.000104193	609.206	660.673	1027.75	260.573	162.817	38.3236	190.139	180.276	134.702	LOC105605706
gene28020	7.07278	-4.86695	1.31498	-3.70115	0.000214621	0.00239701	0.998698	0	0	9.77149	7.5478	16.4244	15.0904	7.21106	6.61115	MCF2
gene28037	1300.86	-1.43195	0.36031	-3.97421	7.06e-05	0.000988939	389.492	770.167	670.922	1581.35	1442.71	1105.91	1690.13	1318.42	2738.67	ARHGEF6
gene28076	672.093	1.06934	0.266804	4.00796	6.12e-05	0.000886395	991.707	991.01	1114.29	583.032	445.32	696.394	425.55	436.269	365.266	GPC4
gene28100	13.7063	-2.52172	0.678247	-3.718	0.000200805	0.00226262	4.99349	3.71165	1.06835	9.77149	19.4086	15.3294	14.0844	25.2387	29.7502	ATP1B4
gene28136	271.785	2.09232	0.501522	4.17194	3.02e-05	0.000499378	435.432	506.64	723.271	110.744	227.512	32.8488	160.965	94.9456	153.709	LOC101118761
gene28148	1641.28	1.52759	0.301403	5.06825	4.01e-07	1.34e-05	3324.67	2125.85	3271.28	1245.05	816.24	659.165	1258.54	1152.57	918.123	ZDHHC9
gene28161	1066.93	-1.19803	0.36916	-3.24527	0.00117338	0.00909905	524.317	682.015	511.738	1321.59	1619.54	525.58	1386.31	1709.02	1322.23	ENOX2
gene28197	748.384	-1.34338	0.313961	-4.2788	1.88e-05	0.000341698	298.611	443.542	366.443	810.219	1126.78	514.631	952.709	1120.12	1102.41	DOCK11
gene28213	22.0887	-2.82148	0.81613	-3.45715	0.000545924	0.00502828	1.9974	3.71165	7.47843	13.8429	20.4869	78.837	6.03617	30.0461	36.3613	IL13RA2
gene28217	798.135	-1.33508	0.357456	-3.73494	0.000187757	0.00213593	483.37	470.451	233.968	727.161	810.849	1573.46	1071.42	794.418	1018.12	RBMX2
gene28219	25.0868	-3.56297	0.908811	-3.92048	8.84e-05	0.00118441	2.99609	0.927912	5.34174	10.5858	12.9391	13.1395	105.633	44.4682	29.7502	LOC101108550
gene28240	732.498	2.11446	0.631518	3.34821	0.000813343	0.006829	1558.97	1079.16	1871.74	412.845	193.008	39.4185	679.07	406.223	352.044	LOC105605723
gene28246	10.134	-4.48562	1.237	-3.62622	0.000287596	0.00302783	0.998698	0.927912	0	6.51432	14.0173	35.0387	7.0422	19.2295	7.43754	GUCY2F
gene28281	98.2866	-1.3767	0.392252	-3.50972	0.000448571	0.00431279	53.9297	33.4048	55.5541	77.3576	111.06	190.523	169.013	93.7438	99.9936	BEX4
gene28304	211.487	-2.36455	0.420558	-5.6224	1.88e-08	1e-06	84.8893	64.0259	19.2303	224.744	225.356	310.968	279.676	331.709	362.787	IL1RAPL2
gene28311	136.788	-1.58413	0.453068	-3.49644	0.000471513	0.00447521	56.9258	82.5842	36.3238	161.23	231.825	73.3622	149.898	153.836	285.106	LOC101118931
gene28313	34.2039	-3.22462	0.790959	-4.07685	4.57e-05	0.000701267	6.99089	7.4233	1.06835	8.9572	23.7216	116.066	40.2412	50.4774	52.8892	LOC105605644
gene28328	7588.01	-2.09132	0.568923	-3.67592	0.000236995	0.00259307	3375.6	1786.23	2009.56	9513.36	8030.85	22601	3689.11	13543.6	3742.74	RPL36A
gene28330	1301.16	1.0632	0.200357	5.30652	1.12e-07	4.63e-06	1894.53	1787.16	2301.22	946.206	1119.23	997.507	910.456	983.108	771.025	HNRNPH2
gene28336	105.04	2.25332	0.371396	6.06715	1.3e-09	1.09e-07	175.771	224.555	266.019	63.5147	67.9302	24.0891	48.2894	39.6608	35.5349	LOC101106998
gene28338	263.409	1.34506	0.272314	4.93936	7.84e-07	2.37e-05	389.492	434.263	502.123	174.258	185.46	225.562	190.139	158.643	110.737	ARMCX2
gene2835	8.16625	-3.14543	0.86738	-3.62636	0.000287449	0.00302783	1.9974	1.85582	0	11.4001	12.9391	10.9496	11.0663	8.4129	14.8751	DCDC2C
gene28408	13.1505	3.08732	0.679722	4.54203	5.57e-06	0.000123213	15.9792	29.6932	50.2123	4.88574	6.46954	0	5.03014	3.60553	2.47918	LOC101103133
gene28429	71.2666	2.06928	0.446715	4.63221	3.62e-06	8.49e-05	101.867	167.952	165.594	58.6289	17.2521	24.0891	44.2653	20.4313	41.3197	LOC101108031
gene2846	332.735	1.18031	0.323786	3.64534	0.000267034	0.00283781	472.384	659.745	459.389	216.601	197.321	175.193	275.652	173.065	365.266	PHF19
gene28505	339.735	-3.92251	1.02294	-3.83456	0.000125788	0.00155229	17.9766	60.3143	19.2303	1367.19	260.938	21.8992	47.2834	1142.95	119.827	LOC101103304
gene2853	153.86	-1.65113	0.507623	-3.25267	0.00114325	0.00892782	33.9557	98.3587	57.6908	187.287	242.608	55.8429	282.694	240.369	185.939	BRINP1
gene28531	10.0363	3.7668	1.04236	3.61373	0.000301828	0.00314915	59.9219	1.85582	17.0936	1.62858	4.31303	0	1.00603	1.20184	3.30557	LOC101109599
gene28536	415.337	1.74339	0.305776	5.70152	1.19e-08	6.96e-07	700.087	823.986	815.149	209.273	346.12	181.763	228.369	281.231	152.056	ENTPD2
gene28538	230.205	2.4142	0.296192	8.15079	3.62e-16	1.65e-13	347.547	592.008	567.292	106.672	93.8083	72.2673	126.76	85.3309	80.1602	ABCA2
gene28558	4.93838	-4.35736	1.3532	-3.22003	0.00128176	0.00972854	0.998698	0	0	7.32861	4.31303	6.56975	10.0603	3.60553	11.5695	LOC105605785
gene28605	102.045	1.5501	0.386799	4.0075	6.14e-05	0.000886847	132.827	166.096	246.788	33.3859	62.5389	89.7866	64.3859	43.2663	79.3338	LOC101103631
gene28644	33.9422	1.35343	0.409294	3.30675	0.000943856	0.00771685	41.9453	86.2958	42.7339	22.8001	31.2694	20.8042	25.1507	20.4313	14.0487	MAN1B1
gene28647	236.764	2.60682	0.556086	4.68779	2.76e-06	6.74e-05	167.781	539.117	897.412	95.272	127.234	28.4689	124.748	78.1198	72.7226	LOC101113831
gene28663	481.001	1.07043	0.325203	3.29157	0.000996307	0.00804201	995.702	718.204	503.192	317.573	226.434	453.313	449.695	340.122	324.773	PLCXD1
gene28690	252.629	1.93557	0.399978	4.83918	1.3e-06	3.57e-05	449.414	533.549	510.67	160.415	136.939	43.7984	180.079	114.175	144.619	LOC101123196
gene28692	303.014	1.91738	0.395421	4.84895	1.24e-06	3.45e-05	665.133	514.991	602.548	116.444	124	320.823	112.675	122.588	147.924	LOC101101878
gene2872	332.778	-2.2132	0.675865	-3.27462	0.00105805	0.00843682	58.9232	93.7191	138.885	355.031	645.876	40.5135	530.177	837.685	294.196	TNFSF15
gene28736	24.2387	-2.97429	0.773125	-3.84711	0.00011952	0.00149784	4.99349	2.78374	5.34174	18.7287	15.0956	10.9496	90.5426	30.0461	39.6669	LOC101109601
gene28741	237.304	-1.805	0.477286	-3.7818	0.0001557	0.0018396	93.8776	133.619	39.5289	249.987	266.329	618.652	229.375	201.91	302.46	LOC106992022
gene28753	172.696	1.96049	0.286404	6.84519	7.64e-12	1.18e-09	303.604	402.714	320.504	70.8433	97.0431	79.932	123.742	62.4958	93.3825	LOC101112462
gene28769	154.683	-1.31326	0.339891	-3.86377	0.000111651	0.00142027	80.8946	94.647	57.6908	268.716	129.391	179.573	231.387	135.808	214.036	LOC101115773
gene28789	1214.31	-1.4543	0.225569	-6.44726	1.14e-10	1.27e-08	443.422	747.897	494.645	1525.17	1590.43	1445.35	1557.33	1460.24	1664.36	LOC105605886
gene28800	601.679	2.24404	0.393708	5.69974	1.2e-08	7.01e-07	1130.53	1462.39	1214.71	273.602	196.243	485.067	299.797	134.606	218.168	LOC101122584
gene28812	122.328	1.95643	0.27294	7.16801	7.61e-13	1.71e-10	223.708	261.671	241.447	75.729	64.6954	42.7034	78.4703	61.294	51.2364	LOC101102298
gene28815	40.3267	1.76838	0.457767	3.86305	0.000111979	0.00142342	90.8815	77.0167	60.8958	21.1716	23.7216	26.279	39.2351	7.21106	16.5279	TSSK2
gene28824	59.7196	-6.99922	2.1132	-3.31214	0.000925861	0.0075907	0	0	2.13669	191.358	28.0347	0	36.217	276.424	3.30557	LOC105605905
gene28839	33.3927	-2.88126	0.726378	-3.9666	7.29e-05	0.00101301	10.9857	2.78374	5.34174	26.8716	38.8172	131.395	35.211	27.6424	21.4862	MCP1
gene28842	34.7804	1.63156	0.461853	3.53265	0.000411416	0.00402752	36.9518	64.9538	88.6728	30.1288	31.2694	10.9496	15.0904	16.8258	18.1807	LOC101107507
gene28844	209.585	2.0085	0.565316	3.55287	0.000381049	0.00379936	241.685	467.668	551.267	136.801	78.7127	21.8992	177.061	64.8995	146.272	LOC101108035
gene28845	47.9522	2.09696	0.399037	5.25504	1.48e-07	5.79e-06	83.8906	106.71	103.63	39.0859	21.5651	17.5193	17.1025	28.8442	13.2223	LOC101108295
gene28865	167.666	2.49927	0.717718	3.48225	0.000497213	0.00467913	213.721	423.128	477.551	46.4146	198.399	77.7421	38.2291	15.624	18.1807	LOC101112891
gene28887	962.789	2.89787	0.224097	12.9313	3e-38	2.66e-34	2029.35	2078.52	2724.29	319.202	287.894	340.532	367.201	251.185	266.925	LOC105605931
gene28937	15.3299	4.09764	0.740856	5.53096	3.18e-08	1.55e-06	61.9193	36.1886	25.6403	2.44287	0	0	2.01206	4.80737	4.95836	CYP17A1
gene29001	291.244	1.18321	0.286036	4.13659	3.53e-05	0.00056856	486.366	488.082	419.861	264.644	189.773	235.416	236.417	123.79	176.848	LOC101118597
gene29017	11.7859	-3.66726	1.07043	-3.42598	0.000612582	0.00549683	0.998698	0.927912	2.13669	6.51432	7.5478	45.9883	9.05426	4.80737	28.0974	LOC101122340
gene29031	40.9525	1.93467	0.601553	3.21613	0.00129932	0.00983516	38.9492	89.0795	114.313	32.5716	23.7216	2.18992	20.1206	22.835	24.7918	LOC105605995
gene29061	121.09	1.35599	0.353551	3.83536	0.000125381	0.0015505	213.721	177.231	221.148	90.3863	51.7563	59.1278	135.814	74.5143	66.1115	LOC101109081
gene2907	106.72	-8.80711	1.86783	-4.71515	2.42e-06	6.05e-05	0	0.927912	0	4.07145	304.068	6.56975	222.332	32.4498	390.058	LOC101109939
gene2908	80.4875	-7.5	1.78685	-4.19733	2.7e-05	0.000454169	1.9974	0	0	12.2144	239.373	13.1395	33.199	9.61474	414.85	LOC101110208
gene29092	37.6294	2.33955	0.418429	5.59128	2.25e-08	1.17e-06	70.9076	110.422	60.8958	8.14291	18.3304	24.0891	12.0723	15.624	18.1807	LOC105606028
gene29106	29.74	2.65966	0.68715	3.87057	0.00010858	0.00139017	73.9037	61.2422	68.3742	21.1716	6.46954	0	15.0904	15.624	5.78475	LOC101117232
gene29107	77.0093	3.09302	0.516968	5.98301	2.19e-09	1.66e-07	121.841	178.159	261.745	38.2717	18.3304	5.47479	23.1387	31.2479	14.8751	LOC101118256
gene29108	905.304	1.85305	0.292443	6.33645	2.35e-10	2.51e-08	1685.8	1326.91	2231.78	600.946	600.589	409.515	507.039	457.902	327.252	LOC101119576
gene29114	13.0653	4.06069	0.733536	5.53578	3.1e-08	1.52e-06	17.9766	30.6211	56.6224	4.07145	2.15651	3.28488	0	1.20184	1.65279	NPPC
gene29122	136.236	2.4446	0.395788	6.17655	6.55e-10	6.09e-08	173.773	343.327	380.332	90.3863	43.1303	35.0387	63.3798	50.4774	46.278	LOC101121082
gene29123	108.904	3.03708	0.488581	6.21613	5.1e-10	4.87e-08	138.819	308.067	341.871	52.9289	32.3477	40.5135	31.1869	9.61474	24.7918	LOC101121333
gene29128	124.081	-2.50169	0.632012	-3.9583	7.55e-05	0.00103431	34.9544	42.6839	12.8202	221.487	242.608	24.0891	248.489	133.405	156.188	LOC105606048
gene2914	1575.26	-1.02208	0.31395	-3.25555	0.00113174	0.00886098	1010.68	871.309	918.779	1632.65	2264.34	1169.42	1452.71	2766.64	2090.78	HSDL2
gene29141	166.527	-1.26165	0.357491	-3.52917	0.000416866	0.00406108	92.8789	122.484	42.7339	208.458	227.512	271.55	182.091	189.891	161.147	LOC105606053
gene29161	95.7911	2.5533	0.48138	5.30413	1.13e-07	4.66e-06	140.816	227.338	275.634	51.3003	44.2085	10.9496	49.2954	20.4313	42.1461	LOC105606063
gene29181	468.185	1.30621	0.322547	4.04968	5.13e-05	0.000772508	1076.6	591.08	662.375	299.659	343.964	235.416	437.623	222.341	344.606	LOC105606075
gene29186	74.5772	2.2445	0.471853	4.75678	1.97e-06	5.08e-05	96.8737	165.168	210.464	37.4574	45.2868	29.5639	43.2592	8.4129	34.7085	LOC105606081
gene292	174.448	1.13552	0.348595	3.25741	0.00112432	0.00881878	327.573	214.348	279.907	140.872	87.3388	183.953	154.928	100.955	80.1602	C1H1orf210
gene29204	27.2923	2.92757	0.510146	5.73868	9.54e-09	5.78e-07	48.9362	68.6655	76.921	4.88574	6.46954	17.5193	5.03014	4.80737	12.3959	LOC105606096
gene29207	143.749	2.40839	0.495455	4.86097	1.17e-06	3.31e-05	342.553	284.869	311.957	35.8288	75.478	14.2345	92.5547	81.7253	54.542	LOC105606098
gene29219	141.638	2.25434	0.355146	6.34764	2.19e-10	2.35e-08	281.633	268.167	348.281	72.4719	75.478	71.1723	82.4944	44.4682	30.5766	LOC101118429
gene29234	38.5939	2.75262	0.488396	5.63605	1.74e-08	9.42e-07	102.866	51.0352	114.313	22.8001	9.70431	19.7093	11.0663	8.4129	7.43754	LOC105606113
gene29243	127.687	1.67479	0.330125	5.07321	3.91e-07	1.31e-05	189.753	257.96	259.608	107.486	46.365	84.3118	83.5004	54.0829	66.1115	LOC101122769
gene29245	11.9	2.46413	0.649503	3.79388	0.000148314	0.00178318	22.9701	17.6303	38.4605	7.32861	6.46954	0	4.02412	3.60553	6.61115	LOC101123021
gene29247	42.4718	2.86496	0.412442	6.94633	3.75e-12	6.34e-10	92.8789	99.2866	107.903	16.2858	15.0956	22.9941	13.0784	4.80737	9.91672	LOC101123541
gene29269	18.4747	2.16799	0.509197	4.25765	2.07e-05	0.000367872	31.9583	56.6026	26.7087	7.32861	3.23477	8.75967	12.0723	7.21106	12.3959	LOC105606135
gene29270	51.7277	2.29509	0.622633	3.6861	0.000227716	0.00250855	58.9232	158.673	113.245	34.2002	15.0956	45.9883	25.1507	6.00922	8.26394	LOC105606136
gene29277	272.825	1.57656	0.370873	4.25094	2.13e-05	0.00037577	542.293	505.712	421.997	157.972	213.495	73.3622	244.465	135.808	160.32	LOC105606140
gene29279	309.141	1.87769	0.279804	6.71072	1.94e-11	2.8e-09	700.087	499.217	602.548	117.258	184.382	154.389	214.284	124.992	185.112	LOC101106506
gene29284	116.032	2.10767	0.375664	5.61051	2.02e-08	1.05e-06	293.617	173.52	245.72	64.329	48.5215	33.9437	61.3678	87.7345	35.5349	PTDSS2
gene29285	639.16	-1.5724	0.419142	-3.75147	0.000175804	0.00202329	392.488	286.725	148.5	684.004	646.954	1532.94	688.124	590.105	782.595	LOC101107265
gene29290	86.2679	-3.39592	0.825918	-4.11169	3.93e-05	0.000619448	28.9622	0.927912	5.34174	80.6148	294.364	106.211	28.1688	131.001	100.82	COX2
gene29296	116.431	-4.10006	1.02454	-4.00187	6.28e-05	0.000902172	19.974	6.49538	3.20504	21.1716	190.851	24.0891	17.1025	192.295	572.691	ND4
gene29299	126989	-1.22142	0.373675	-3.26868	0.0010805	0.00856968	100695	46363.1	54742.1	169802	189493	84592.1	144940	217160	135116	CYTB
gene2931	112.659	-2.04641	0.483579	-4.2318	2.32e-05	0.000400705	25.9662	56.6026	26.7087	102.601	216.73	58.0328	167.001	145.423	214.862	MUSK
gene295	4.38966	3.46699	1.01922	3.40161	0.000669902	0.00587065	7.98959	9.27912	16.0252	0	2.15651	0	0	2.40369	1.65279	LOC105607154
gene2997	58.7409	-1.70157	0.473576	-3.59302	0.000326864	0.00335906	42.944	15.7745	11.7518	63.5147	99.1996	67.8874	68.41	49.2756	109.91	GRIN3A
gene3006	100.568	-1.54018	0.47267	-3.25847	0.00112015	0.00880395	43.9427	56.6026	32.0504	135.172	164.973	38.3236	167.001	167.056	99.9936	PLPPR1
gene302	634.955	1.08072	0.274687	3.93437	8.34e-05	0.00112989	918.802	1117.21	901.685	521.96	297.599	534.34	571.424	368.966	482.614	LOC101107405
gene3021	77.7038	2.68554	0.756342	3.55069	0.000384218	0.00382023	78.8972	180.015	274.565	31.7573	29.1129	0	27.1628	48.0737	29.7502	S1PR3
gene304	7683.88	1.45799	0.227087	6.4204	1.36e-10	1.49e-08	12724.4	13347.1	13949.4	5982.59	4192.26	4628.39	6098.55	4154.77	4077.43	PTPRF
gene3040	526.262	-1.00789	0.300554	-3.35344	0.000798124	0.00672667	280.634	323.841	338.666	456.817	763.406	428.129	559.352	734.326	851.185	SYK
gene3090	53.3478	-2.53941	0.429373	-5.91423	3.33e-09	2.36e-07	13.9818	11.1349	12.8202	42.3431	93.8083	87.5967	56.3376	100.955	61.1531	HSD17B3
gene3097	1337.4	-1.48589	0.402857	-3.68838	0.000225686	0.00249082	632.176	686.655	504.26	1839.48	2148.97	586.898	1675.04	2324.36	1638.74	FANCC
gene3111	129.907	-1.21948	0.312438	-3.90312	9.5e-05	0.00125283	91.8802	60.3143	54.4857	166.93	146.643	101.831	194.164	182.68	170.237	LOC101114490
gene3133	854.52	-1.60511	0.427283	-3.75656	0.000172263	0.00198769	349.544	424.056	311.957	769.505	1186.08	418.274	1162.97	1187.42	1880.87	KIF27
gene3156	100.911	1.73347	0.381955	4.53841	5.67e-06	0.000124722	181.763	110.422	275.634	75.729	45.2868	37.2286	73.4401	51.6793	57.0212	KIAA1161
gene3164	2095.64	3.03033	0.27417	11.0528	2.13e-28	7.55e-25	5997.18	4431.71	4723.16	818.362	565.006	562.809	762.57	576.885	423.113	AQP3
gene3165	124.068	-3.96591	0.777129	-5.10329	3.34e-07	1.14e-05	15.9792	11.1349	7.47843	38.2717	63.6171	405.135	140.844	56.4866	377.662	AQP7
gene3175	410.885	-1.76396	0.392904	-4.48955	7.14e-06	0.000150887	157.794	216.203	100.425	548.018	459.337	290.164	624.744	443.48	857.796	DNAJA1
gene3181	43.895	-1.46204	0.383943	-3.80797	0.000140114	0.00170421	20.9727	18.5582	21.3669	75.729	30.1912	52.558	50.3014	60.0922	65.2851	LOC101106395
gene3204	50.0903	-1.85678	0.55414	-3.35075	0.000805943	0.0067829	8.98828	22.2699	23.5036	40.7145	54.9911	27.374	63.3798	75.7161	133.876	ADAM28
gene3206	929.684	-2.18079	0.51211	-4.25845	2.06e-05	0.000367023	270.647	214.348	346.145	864.777	1648.65	2714.4	827.962	468.719	1011.51	STC1
gene3231	620.995	1.58928	0.29644	5.3612	8.27e-08	3.52e-06	1455.1	881.516	1020.27	397.374	341.807	502.586	379.273	371.369	239.654	PHYHIP
gene3236	9651.28	1.95184	0.260462	7.49377	6.69e-14	1.98e-11	18925.3	17493	20842.4	6650.31	3757.72	5746.34	5310.83	3863.93	4271.63	HR
gene3243	1092.55	1.19102	0.230902	5.15814	2.49e-07	8.86e-06	1429.14	1763.96	2048.02	824.876	791.44	928.525	705.226	758.363	583.434	XPO7
gene3257	41.4392	-2.68548	0.836261	-3.21129	0.00132139	0.0099471	3.99479	19.4862	3.20504	12.2144	23.7216	53.653	135.814	98.5511	22.3126	LOC101123612
gene3268	111.116	-3.72292	0.627617	-5.93184	3e-09	2.15e-07	9.98698	7.4233	19.2303	36.6431	188.695	110.591	104.627	231.956	290.891	NR4A3
gene3297	771.15	-1.16113	0.286053	-4.05914	4.93e-05	0.000748166	502.345	344.255	421.997	833.019	906.814	941.665	1047.28	627.362	1315.62	TMOD1
gene3300	165.414	-1.58232	0.413256	-3.8289	0.000128719	0.00158405	91.8802	75.1609	45.9389	284.187	205.947	85.4068	195.17	246.378	258.661	CCDC180
gene3302	8.42166	2.98226	0.786233	3.7931	0.000148777	0.00178633	30.9596	22.2699	7.47843	4.88574	2.15651	4.37984	2.01206	0	1.65279	IGFBPL1
gene332	43.0762	-1.56583	0.464251	-3.3728	0.000744078	0.00636174	33.9557	10.207	11.7518	42.3431	64.6954	48.1782	62.3738	74.5143	39.6669	BEST4
gene333	1467.68	1.14569	0.270635	4.23336	2.3e-05	0.000399257	2426.84	1782.52	2728.56	1214.92	834.571	1331.47	1148.89	955.465	785.9	PLK3
gene3343	100.947	-1.44402	0.367739	-3.92675	8.61e-05	0.0011601	41.9453	65.8817	33.1188	156.344	108.904	81.027	164.989	100.955	155.362	FAM221B
gene3360	22.7008	-1.89708	0.558547	-3.39646	0.000682642	0.00593651	3.99479	7.4233	12.8202	27.6859	19.4086	56.9379	26.1568	30.0461	19.8334	FAM166B
gene3362	198.269	-1.9822	0.58823	-3.36976	0.000752328	0.00642609	85.888	61.2422	53.4174	728.79	167.13	226.656	109.657	210.323	141.313	LOC101109422
gene3389	3962.51	-1.14853	0.304917	-3.76671	0.00016541	0.00192866	2092.27	2337.41	2133.49	4240.83	5665.16	2694.69	4431.56	5452.76	6614.45	GNAQ
gene3392	342.462	-2.1512	0.590767	-3.64137	0.000271188	0.00287554	77.8985	134.547	99.3563	428.317	410.816	56.9379	693.154	545.637	635.497	GNA14
gene3418	36.8292	-2.51627	0.534364	-4.7089	2.49e-06	6.21e-05	3.99479	13.9187	8.54678	29.3145	50.6781	28.4689	57.3437	80.5235	58.6739	TMC1
gene3432	338.859	-1.76742	0.518916	-3.40598	0.000659265	0.00580428	179.766	147.538	63.0325	267.902	667.441	136.87	504.021	612.94	470.218	TRPM3
gene3481	42.7786	-2.26154	0.635766	-3.55719	0.000374845	0.00375437	8.98828	25.9815	1.06835	63.5147	84.104	32.8488	41.2472	66.1014	61.1531	LOC101117653
gene3485	505.574	-2.3957	0.574368	-4.17101	3.03e-05	0.000500942	95.875	178.159	120.723	589.546	982.292	100.736	653.919	772.785	1056.13	GLIS3
gene3490	180.049	-1.25487	0.246696	-5.08669	3.64e-07	1.23e-05	105.862	88.1516	86.5361	201.13	166.052	234.321	252.513	264.405	221.473	SPATA6L
gene3501	44.0648	-2.18397	0.610677	-3.57631	0.00034848	0.00354225	18.9753	14.8466	5.34174	30.943	69.0084	18.6143	50.3014	100.955	87.5977	INSL6
gene3528	2070.22	-1.76329	0.400934	-4.39796	1.09e-05	0.00021537	767.999	952.966	670.922	3385.01	3209.97	901.151	2819.9	3022.64	2901.47	PTPRD
gene3568	126.922	-1.90509	0.491795	-3.87375	0.000107175	0.00137814	44.9414	65.8817	23.5036	140.058	223.199	56.9379	239.435	144.221	204.119	SH3GL2
gene3581	728.097	-4.28085	0.851822	-5.02553	5.02e-07	1.61e-05	60.9206	79.8004	23.5036	127.844	1150.5	78.837	902.408	1842.43	2286.63	SLC24A2
gene360	431.821	-1.70454	0.408212	-4.17562	2.97e-05	0.000493737	134.824	200.429	181.619	582.218	781.736	214.612	428.568	721.106	641.281	PIK3R3
gene3615	38.8737	-5.46189	1.05984	-5.1535	2.56e-07	9.06e-06	0	2.78374	1.06835	84.6862	142.33	10.9496	34.205	56.4866	17.3543	IFNE
gene3618	137.284	2.13816	0.472837	4.52198	6.13e-06	0.000132996	201.737	254.248	393.152	50.486	94.8866	111.686	64.3859	36.0553	28.9238	CDKN2B
gene3626	121.195	1.6504	0.412232	4.00357	6.24e-05	0.000898946	142.814	228.266	295.932	114.815	62.5389	31.7538	77.4642	66.1014	71.0698	LOC105608393
gene3642	21.4921	-3.05477	0.62323	-4.90152	9.51e-07	2.78e-05	0.998698	4.63956	5.34174	20.3573	42.052	41.6084	18.1085	26.4405	33.8821	LOC105611471
gene3650	118.081	-1.68392	0.287009	-5.86716	4.43e-09	2.99e-07	47.9375	58.4585	36.3238	171.815	133.704	195.998	135.814	156.24	126.438	LINGO2
gene3658	630.259	1.17398	0.299782	3.91612	9e-05	0.00120146	1045.64	798.932	1162.36	449.488	524.033	614.272	448.689	301.663	327.252	LOC101112287
gene3765	433.191	-2.0808	0.494891	-4.20457	2.62e-05	0.000442394	133.826	180.943	97.2196	536.617	804.379	143.44	597.581	531.215	873.498	OCA2
gene381	114.299	2.99559	0.822665	3.64133	0.000271231	0.00287554	271.646	185.582	365.375	44.786	34.5042	14.2345	103.621	4.80737	4.13197	LOC101105114
gene3827	306.744	-1.90582	0.480711	-3.96459	7.35e-05	0.0010164	123.839	132.691	68.3742	377.831	381.703	110.591	533.195	437.471	595.003	C2H2orf88
gene3845	2441.76	-1.57903	0.339961	-4.64473	3.41e-06	8.06e-05	1068.61	1068.03	1013.86	2898.87	4162.07	1433.3	2930.56	3571.88	3828.68	GULP1
gene3848	1373.96	-1.5196	0.459927	-3.304	0.000953156	0.00777499	468.389	618.917	748.912	1250.75	1656.2	643.836	1489.93	3242.57	2246.14	CALCRL
gene3860	483.315	-2.75535	0.686215	-4.01528	5.94e-05	0.000863782	53.9297	197.645	48.0756	415.288	1710.11	156.579	498.99	819.657	449.558	ZNF804A
gene3876	594.277	-1.90643	0.530193	-3.59574	0.000323475	0.00332808	195.745	312.706	120.723	515.446	1401.73	212.422	769.612	908.593	911.512	PDE1A
gene3877	7.25884	-3.98299	1.15772	-3.44038	0.000580893	0.00527647	0	0.927912	1.06835	7.32861	10.7826	16.4244	6.03617	12.0184	10.7431	PPP1R1C
gene3894	228.377	-2.7608	0.633829	-4.35575	1.33e-05	0.000256246	85.888	29.6932	25.6403	182.401	352.59	97.4513	695.166	163.451	423.113	ZNF385B
gene3899	1724.92	-2.01997	0.366044	-5.5184	3.42e-08	1.66e-06	485.367	630.98	587.591	2195.33	2593.21	1255.92	2326.94	1602.06	3846.86	SESTD1
gene3911	195.295	-1.20171	0.293321	-4.09692	4.19e-05	0.000651058	107.859	113.205	92.9462	249.173	231.825	257.315	269.616	138.212	297.502	PRKRA
gene3912	723.481	-1.06622	0.29047	-3.67068	0.000241906	0.00263544	359.531	436.119	459.389	831.391	1003.86	543.1	741.443	1188.62	947.873	OSBPL6
gene3937	225.107	-1.74507	0.460729	-3.78762	0.000152099	0.00181273	59.9219	157.745	44.8706	213.344	259.86	489.447	338.026	211.524	251.224	HOXD3
gene3968	555.667	1.40903	0.229289	6.14522	7.99e-10	7.2e-08	970.735	961.317	920.915	361.545	367.685	462.073	332.996	255.993	367.745	CDCA7
gene3975	113.117	1.72747	0.353414	4.88796	1.02e-06	2.94e-05	170.777	229.194	235.036	75.729	101.356	43.7984	68.41	40.8627	52.8892	DLX2
gene3977	427.595	-1.12797	0.288123	-3.91489	9.04e-05	0.00120579	274.642	282.085	159.184	435.645	600.589	663.545	414.484	550.444	467.739	METAP1D
gene3992	113.209	-1.77007	0.513835	-3.44483	0.000571423	0.00520375	39.9479	38.0444	52.349	215.787	173.599	271.55	76.4582	81.7253	69.4171	ERICH2
gene4003	784.939	-1.09394	0.331604	-3.29893	0.000970556	0.00789516	570.257	346.111	424.134	798.819	778.501	1335.85	742.449	1346.06	722.268	PHOSPHO2
gene4004	35.5834	-1.95851	0.427408	-4.5823	4.6e-06	0.000104703	13.9818	14.8466	7.47843	37.4574	35.5825	54.7479	35.211	56.4866	64.4587	CCDC173
gene4006	640.685	-1.07372	0.251462	-4.26992	1.96e-05	0.000351819	344.551	372.093	389.947	776.833	949.944	581.423	750.498	981.906	618.969	FASTKD1
gene4011	55.6425	-1.63549	0.43511	-3.7588	0.000170731	0.00197514	13.9818	38.9723	16.0252	47.2289	81.9475	61.3177	62.3738	104.56	74.3754	DHRS9
gene4015	546.57	-1.0287	0.281562	-3.65354	0.000258649	0.00275861	407.469	283.941	276.702	517.889	795.753	508.061	557.34	810.042	761.935	NOSTRIN
gene4022	94.9847	-4.64963	0.749072	-6.20719	5.39e-10	5.1e-08	3.99479	8.35121	4.27339	328.973	57.1476	36.1336	86.5185	231.956	97.5144	LOC106990335
gene4028	119.191	-2.86816	0.510262	-5.62095	1.9e-08	1e-06	27.9635	19.4862	21.3669	177.515	146.643	40.5135	221.326	179.075	238.828	SCN1A
gene4032	23.6299	-2.74445	0.637934	-4.30209	1.69e-05	0.000312651	1.9974	8.35121	4.27339	32.5716	61.4606	19.7093	16.0965	38.459	29.7502	CSRNP3
gene4035	67.4919	-1.8306	0.529444	-3.45759	0.000545038	0.00502272	22.9701	23.1978	28.8454	61.8861	80.8692	27.374	129.778	69.7069	162.8	SCN3A
gene404	273.797	-2.38465	0.480336	-4.96455	6.89e-07	2.12e-05	101.867	62.1701	51.2807	516.26	172.521	168.624	569.412	467.517	354.523	AGBL4
gene4043	432.584	-2.89833	0.529435	-5.47438	4.39e-08	2.06e-06	45.9401	47.3235	151.705	682.375	956.414	249.651	449.695	871.336	438.815	KCNH7
gene4049	2741.8	-1.20388	0.243773	-4.93852	7.87e-07	2.37e-05	1396.18	1452.18	1552.31	2560.94	3558.25	2659.65	3305.81	4456.43	3734.47	FAP
gene4050	10.3232	-6.39573	1.42751	-4.48034	7.45e-06	0.000156059	0	0	0	14.6572	12.9391	38.3236	16.0965	8.4129	2.47918	GCG
gene4053	275.833	-1.4047	0.436037	-3.22151	0.00127517	0.00970971	144.811	152.178	97.2196	466.588	479.824	124.825	297.785	450.691	268.578	SLC4A10
gene4066	7887.29	-1.10656	0.273103	-4.05182	5.08e-05	0.000768077	4872.65	4935.56	3568.28	9954.7	9790.57	6006.94	9210.2	12386.2	10260.5	RBMS1
gene4086	19.0539	-3.21401	0.901342	-3.5658	0.000362746	0.00366003	0.998698	5.56747	2.13669	46.4146	50.6781	3.28488	12.0723	15.624	34.7085	UPP2
gene4089	75.4625	-2.44019	0.719136	-3.39322	0.000690759	0.00600122	11.9844	25.0536	20.2986	35.8288	89.4953	48.1782	109.657	31.2479	307.418	ACVR1C
gene4100	627.324	-2.50509	0.607108	-4.12627	3.69e-05	0.00058931	120.842	136.403	199.781	264.644	1043.75	218.992	942.649	1841.22	877.63	NR4A2
gene4101	25.6922	-2.40786	0.529583	-4.54671	5.45e-06	0.00012111	5.99219	6.49538	7.47843	30.1288	58.2259	20.8042	26.1568	28.8442	47.1044	KCNJ3
gene4103	111.166	-2.51826	0.61396	-4.10166	4.1e-05	0.000641781	10.9857	51.9631	17.0936	140.872	340.729	134.68	64.3859	153.836	85.9449	GALNT13
gene4119	657.561	-2.77694	0.476738	-5.82487	5.72e-09	3.73e-07	106.861	100.214	195.508	300.473	1131.09	707.343	912.468	901.382	1562.71	TNFAIP6
gene413	247.937	1.49886	0.298245	5.02561	5.02e-07	1.61e-05	546.288	335.904	424.134	138.429	178.991	147.819	212.272	141.817	105.778	CDKN2C
gene4134	1921.6	-1.55012	0.423087	-3.66382	0.000248481	0.00268729	889.84	854.607	777.757	3359.76	2680.55	796.035	2807.83	3254.59	1873.43	LYPD6B
gene4136	85.2805	-1.68164	0.484708	-3.46938	0.00052167	0.00487057	13.9818	43.6119	45.9389	55.3718	117.53	144.535	100.603	75.7161	170.237	KIF5C
gene4161	908.781	-2.27838	0.580923	-3.922	8.78e-05	0.00117783	214.72	308.995	240.378	763.805	1208.73	226.656	1117.7	2671.7	1426.36	ARHGAP15
gene4164	252.385	-2.19591	0.376045	-5.83949	5.24e-09	3.47e-07	66.9128	112.277	43.8022	305.359	230.747	404.04	279.676	493.957	334.689	LRP1B
gene4173	91.5371	-2.03806	0.362829	-5.61714	1.94e-08	1.02e-06	21.9714	35.2607	32.0504	110.744	155.269	90.8816	80.4823	168.258	128.917	THSD7B
gene4175	419.561	1.01519	0.285025	3.56175	0.000368386	0.0037039	802.953	512.207	582.249	300.473	281.425	319.728	228.369	449.489	299.154	CXCR4
gene4195	298.96	-2.60185	0.486652	-5.34643	8.97e-08	3.77e-06	84.8893	69.5934	50.2123	456.817	678.223	110.591	356.134	396.608	487.572	TMEM163
gene4235	13.347	-2.63469	0.636038	-4.14235	3.44e-05	0.000556472	2.99609	2.78374	3.20504	13.8429	17.2521	16.4244	15.0904	20.4313	28.0974	CFAP221
gene4242	515.361	1.0223	0.311655	3.28023	0.00103724	0.00830822	652.15	798.932	885.66	390.859	374.155	624.127	295.773	325.699	290.891	TMEM185B
gene4263	54.3193	-3.44123	0.609512	-5.64587	1.64e-08	9.06e-07	5.99219	12.0629	3.20504	36.6431	75.478	159.864	49.2954	90.1382	56.1948	CNTNAP5
gene428	239.585	-2.08429	0.434796	-4.79373	1.64e-06	4.37e-05	95.875	77.0167	54.4857	345.259	282.503	118.256	277.664	437.471	467.739	RAB3B
gene4281	34.229	-2.4666	0.467056	-5.28116	1.28e-07	5.13e-06	5.99219	13.9187	5.34174	30.1288	40.9737	42.7034	58.3497	55.2848	55.3684	TMEFF2
gene4285	62.7033	-1.9964	0.612627	-3.25876	0.001119	0.00880366	12.9831	39.9002	9.61513	30.943	61.4606	104.021	50.3014	165.854	89.2505	DNAH7
gene4290	223.047	-1.58987	0.454481	-3.4982	0.000468401	0.00446238	77.8985	158.673	49.144	397.374	221.043	135.775	275.652	323.296	368.572	CCDC150
gene4305	569.622	-2.0322	0.574484	-3.53744	0.00040402	0.00397484	163.787	252.392	142.09	692.961	1122.47	108.401	884.299	1105.7	654.504	PLCL1
gene4350	33.0392	-2.56474	0.562806	-4.55707	5.19e-06	0.000116309	7.98959	3.71165	11.7518	43.1574	46.365	24.0891	40.2412	32.4498	87.5977	CDK15
gene4351	572.905	3.40864	0.421104	8.09454	5.75e-16	2.55e-13	764.004	1441.05	2134.56	145.758	147.721	70.0774	205.23	97.3493	150.404	FZD7
gene4359	168.165	-1.64099	0.333114	-4.92621	8.38e-07	2.51e-05	67.9115	69.5934	71.5793	203.573	208.104	365.716	168.007	159.845	199.161	ICA1L
gene4369	83.2342	-2.08949	0.586665	-3.56163	0.000368554	0.0037039	15.9792	52.891	9.61513	74.9147	94.8866	49.2731	117.705	132.203	201.64	CTLA4
gene4383	126.874	-1.60809	0.373511	-4.30533	1.67e-05	0.000308744	40.9466	53.8189	66.2375	178.33	115.373	89.7866	180.079	237.965	179.327	ADAM23
gene4386	60.8222	-2.90375	0.605307	-4.79715	1.61e-06	4.3e-05	12.9831	15.7745	5.34174	52.9289	24.7999	68.9824	148.892	133.405	84.2921	MDH1B
gene4389	164.581	-1.12034	0.264865	-4.22983	2.34e-05	0.000403203	90.8815	106.71	79.0577	236.959	163.895	243.081	188.127	216.332	156.188	CPO
gene4399	195.466	1.47397	0.317356	4.64452	3.41e-06	8.06e-05	375.511	214.348	432.681	95.272	116.452	102.926	160.965	147.827	113.216	FZD5
gene4413	40.373	-1.7677	0.432951	-4.0829	4.45e-05	0.000685616	17.9766	17.6303	10.6835	43.9717	69.0084	28.4689	48.2894	76.918	50.41	PTH2R
gene4431	2342.26	-2.58822	0.718796	-3.60078	0.000317268	0.0032718	838.906	406.425	372.853	4723.7	3336.13	145.63	3822.91	4617.48	2816.35	ERBB4
gene4438	328.23	-2.29284	0.430623	-5.32447	1.01e-07	4.22e-06	87.8854	123.412	61.9642	274.416	502.468	227.751	369.213	630.968	675.99	SPAG16
gene4439	55.825	-3.39927	0.672282	-5.05632	4.27e-07	1.41e-05	2.99609	11.1349	8.54678	120.515	164.973	44.8933	29.1748	80.5235	39.6669	VWC2L
gene4486	43.6667	-1.92101	0.4212	-4.56079	5.1e-06	0.000114553	20.9727	11.1349	13.8885	43.1574	49.5998	50.3681	56.3376	51.6793	95.8616	PLCD4
gene4504	2576.3	1.45552	0.298762	4.87183	1.11e-06	3.16e-05	5340.04	3543.7	4524.45	1511.32	1647.58	2511.84	1610.65	1282.37	1214.8	FAM134A
gene4562	705.053	-2.05764	0.514881	-3.99635	6.43e-05	0.000918255	177.768	286.725	215.806	810.219	1049.14	187.238	1096.57	1465.05	1056.96	DOCK10
gene4564	20.1079	-2.51818	0.6969	-3.61339	0.000302214	0.00314948	3.99479	9.27912	1.06835	17.1001	33.426	16.4244	15.0904	30.0461	54.542	NYAP2
gene4585	1903.74	-1.80997	0.340186	-5.32053	1.03e-07	4.3e-06	655.146	788.725	694.426	2608.99	3221.83	1094.96	2623.72	2594.78	2851.06	PID1
gene4586	19.1801	-2.6296	0.588491	-4.46837	7.88e-06	0.000164084	2.99609	5.56747	4.27339	26.0573	19.4086	21.8992	16.0965	43.2663	33.0557	DNER
gene4588	285.378	-2.38985	0.590258	-4.04883	5.15e-05	0.000772946	75.9011	90.0075	57.6908	286.63	407.581	53.653	388.327	644.188	564.427	FBXO36
gene4596	1140.34	-1.07295	0.315545	-3.40031	0.000673107	0.0058824	567.261	777.59	626.052	1322.41	1324.1	748.952	1515.08	1433.8	1947.81	LOC101121244
gene4599	673.974	1.45227	0.247809	5.86043	4.62e-09	3.09e-07	1013.68	1107	1383.51	396.559	475.511	294.544	445.671	520.398	428.898	ITM2C
gene4603	52.3784	2.47764	0.728345	3.40174	0.000669595	0.00587065	126.835	69.5934	150.637	31.7573	10.7826	2.18992	53.3195	18.0276	8.26394	C2H2orf72
gene4647	972.466	1.49627	0.377737	3.96113	7.46e-05	0.00102641	2230.09	1243.4	1647.39	597.689	428.068	1027.07	561.364	663.417	353.696	TMEM54
gene4653	924.733	1.20282	0.319884	3.76017	0.000169801	0.00196566	1497.05	1210.93	1745.68	741.819	363.372	828.884	822.932	551.646	560.295	KIAA1522
gene4657	885.363	-1.09201	0.266646	-4.09536	4.22e-05	0.000654315	618.194	493.649	401.699	984.477	1021.11	1485.86	820.92	1146.56	995.804	ZBTB8OS
gene467	677.794	-1.29877	0.354091	-3.66791	0.000244545	0.00265442	431.438	385.083	213.669	811.033	843.197	434.699	1049.29	932.63	999.11	HSPB11
gene4675	1645.01	1.03845	0.310296	3.34665	0.000817957	0.00685155	2396.88	2402.36	2701.85	1233.65	1000.62	2018.01	1198.18	883.355	970.186	TXLNA
gene4683	1209.24	1.20804	0.251749	4.7986	1.6e-06	4.28e-05	2456.8	1451.25	1925.16	901.42	783.893	1063.2	842.046	764.372	694.997	PEF1
gene4695	109.414	2.4274	0.376591	6.44572	1.15e-10	1.28e-08	141.815	273.734	303.411	64.329	36.6607	38.3236	44.2653	27.6424	54.542	SDC3
gene4754	958.314	1.29254	0.289762	4.46069	8.17e-06	0.000168796	1570.95	1497.65	1680.51	879.434	621.076	375.571	748.486	579.288	671.858	WDTC1
gene4760	322.078	1.26355	0.319781	3.95129	7.77e-05	0.00106101	565.263	438.902	576.908	206.016	230.747	325.203	256.537	158.643	140.487	KDF1
gene4798	810.642	1.68411	0.345298	4.87726	1.08e-06	3.09e-05	1238.39	1598.79	1660.21	452.746	535.894	209.137	592.551	438.673	569.385	SEPN1
gene4832	1658.52	1.15879	0.296872	3.90335	9.49e-05	0.00125259	2165.18	2559.18	3149.49	1225.51	1028.66	1755.22	1224.34	794.418	1024.73	TCEB3
gene4836	617.651	1.05139	0.286539	3.66926	0.000243252	0.00264702	1058.62	990.082	779.894	534.989	415.129	652.595	392.351	417.04	318.162	E2F2
gene486	3092.21	1.96401	0.583829	3.36402	0.000768147	0.00653431	8347.12	3669.89	6381.24	1183.98	1146.19	292.354	2942.63	2388.06	1478.42	DHCR24
gene4862	1438.05	1.29889	0.351534	3.69491	0.000219966	0.00244193	2064.31	2338.34	2737.11	867.219	1174.22	917.575	1244.46	429.058	1170.17	HSPG2
gene4865	225.349	1.00556	0.295372	3.40439	0.000663128	0.00582673	304.603	334.048	378.195	211.716	102.434	182.858	200.2	129.799	184.286	RAP1GAP
gene4881	413.08	1.3794	0.266977	5.16674	2.38e-07	8.58e-06	860.878	621.701	618.573	224.744	376.312	267.17	215.29	288.442	244.612	CAMK2N1
gene49	1351.24	1.12733	0.288875	3.90248	9.52e-05	0.00125524	2015.37	1946.76	2386.69	942.948	752.623	1490.24	1017.1	710.289	899.116	ASB1
gene4904	280.097	1.19861	0.215987	5.54947	2.87e-08	1.43e-06	497.352	403.642	446.569	214.158	161.738	233.226	206.236	167.056	190.897	AKR7A2
gene4908	915.406	1.33416	0.258263	5.16589	2.39e-07	8.6e-06	1233.39	1726.84	1634.57	705.99	644.797	692.014	645.871	399.012	556.163	EMC1
gene4912	659.764	1.97018	0.368182	5.35109	8.74e-08	3.69e-06	1504.04	938.119	1489.28	434.831	405.424	148.914	322.935	402.617	291.717	ALDH4A1
gene4916	11.1605	3.15328	0.685513	4.59989	4.23e-06	9.7e-05	22.9701	25.0536	34.1871	4.88574	6.46954	0	4.02412	1.20184	1.65279	KLHDC7A
gene4927	156.214	2.23911	0.501979	4.46056	8.17e-06	0.000168796	281.633	286.725	418.792	74.1004	62.5389	157.674	38.2291	56.4866	29.7502	LOC105610921
gene4928	1777.71	1.44505	0.315411	4.58147	4.62e-06	0.000104981	3097.96	3195.73	2930.48	1305.31	1059.93	1748.65	899.39	682.647	1079.27	PADI3
gene4933	966.167	2.44132	0.225262	10.8377	2.28e-27	6.75e-24	2165.18	2003.36	2187.98	442.16	357.981	430.319	447.683	271.617	389.231	ATP13A2
gene4938	1870.59	1.06788	0.279655	3.81857	0.000134229	0.00164276	3294.71	2525.78	2794.8	1198.64	1303.61	2137.36	1310.86	1109.3	1160.26	SZRD1
gene4943	121.372	1.77261	0.351144	5.04811	4.46e-07	1.46e-05	224.707	233.834	230.763	110.744	71.1649	47.0832	51.3075	78.1198	44.6252	RSG1
gene4946	851.261	1.28501	0.252929	5.0805	3.76e-07	1.27e-05	1198.44	1711.07	1299.11	688.89	493.842	625.221	630.78	407.425	606.573	EPHA2
gene4967	15.7399	1.71336	0.531154	3.22573	0.00125653	0.00959644	25.9662	41.756	20.2986	13.0286	12.9391	7.66471	11.0663	4.80737	4.13197	ENTPD8
gene4970	465.223	1.17368	0.286208	4.1008	4.12e-05	0.000643045	731.047	921.417	567.292	350.145	259.86	236.511	428.568	313.681	378.488	TRAF2
gene4974	659.495	2.07969	0.285439	7.28594	3.19e-13	7.88e-11	1577.94	1415.99	1036.3	449.488	341.807	283.594	305.833	218.735	305.766	RABL6
gene4982	251.069	2.68077	0.309608	8.65859	4.78e-18	3.39e-15	519.323	519.631	683.742	95.272	85.1823	108.401	123.742	54.0829	70.2434	PPP1R26
gene4989	1078.85	2.13832	0.392831	5.44335	5.23e-08	2.39e-06	1206.43	2130.49	3339.65	455.188	701.945	667.925	458.749	298.057	451.211	COL5A1
gene5000	14.7654	2.42111	0.725287	3.33815	0.000843387	0.0070314	27.9635	46.3956	22.4353	9.77149	1.07826	13.1395	8.04823	2.40369	1.65279	RNF224
gene5002	1840.63	2.01305	0.400029	5.03227	4.85e-07	1.57e-05	4186.54	3191.09	3698.62	543.946	858.292	1826.39	851.101	779.996	629.712	LOC101109608
gene5003	64.0997	1.39131	0.368508	3.77554	0.000159662	0.0018799	152.801	80.7283	94.0146	49.6717	30.1912	25.1841	51.3075	51.6793	41.3197	LOC106990978
gene5015	78.7681	1.40425	0.336376	4.17465	2.98e-05	0.000495298	156.796	132.691	114.313	46.4146	65.7736	61.3177	61.3678	26.4405	43.7989	CACFD1
gene5034	1301.86	1.48911	0.299305	4.97523	6.52e-07	2.03e-05	2033.35	2397.72	2411.26	877.805	590.885	1239.49	808.847	564.866	792.511	SEC16A
gene5041	232.414	1.39002	0.397381	3.49795	0.000468841	0.00446417	340.556	514.991	330.119	92.0148	124	291.259	129.778	144.221	124.785	GPSM1
gene5047	138.794	1.47916	0.269372	5.49114	3.99e-08	1.89e-06	288.624	194.862	243.583	74.1004	115.373	86.5017	97.5848	73.3124	75.2018	C3H9orf69
gene5089	882.104	1.45274	0.244484	5.94207	2.81e-09	2.05e-07	1545.98	1445.69	1596.11	662.833	585.493	656.975	597.581	382.186	466.086	LAMC3
gene510	9028.48	1.76317	0.313638	5.62167	1.89e-08	1e-06	18208.3	13652.4	19268.7	4914.24	4755.11	7222.35	4470.79	5863.79	2900.64	TACSTD2
gene5112	271.367	1.17197	0.26054	4.49824	6.85e-06	0.000145547	417.456	436.119	440.159	158.787	156.347	272.645	208.248	155.038	197.508	ASB6
gene5122	5728.92	1.86801	0.551518	3.38703	0.000706546	0.0060907	16552.4	5065.47	11692	3269.38	1669.14	1904.13	7243.41	2455.37	1708.98	CRAT
gene5124	384.653	1.04127	0.30689	3.39298	0.000691358	0.00600303	484.369	694.078	577.976	363.988	286.816	182.858	367.201	207.919	296.675	FAM73B
gene5131	194.631	1.2153	0.257436	4.72077	2.35e-06	5.91e-05	348.546	339.616	253.198	126.215	160.66	107.306	157.947	106.964	151.23	C3H9orf114
gene5139	5564	2.12171	0.348825	6.08244	1.18e-09	1.01e-07	8532.88	11688	14089.4	3128.5	2458.42	1588.79	3842.02	1763.1	2984.93	SPTAN1
gene5144	416.769	1.21662	0.23662	5.14167	2.72e-07	9.63e-06	725.055	588.296	702.973	329.788	290.051	198.188	318.911	323.296	274.363	URM1
gene5146	1500.06	1.27278	0.373479	3.4079	0.000654646	0.0057722	3217.81	1687.87	2480.7	872.919	587.65	1753.03	992.951	950.658	956.964	SLC27A4
gene5151	2900.26	1.64983	0.236334	6.98092	2.93e-12	5.26e-10	5707.56	4524.5	5710.32	1876.94	1957.04	1638.06	1978.86	1219.87	1489.16	GOLGA2
gene5165	450.656	1.45125	0.378001	3.83929	0.000123389	0.00153657	801.955	637.476	902.754	210.087	236.138	555.144	268.61	211.524	232.217	ST6GALNAC6
gene5177	3636.81	1.70091	0.365909	4.64844	3.34e-06	7.95e-05	6618.37	6014.73	7632.27	2668.43	1693.94	900.056	2901.39	2121.25	2180.85	FAM129B
gene5202	1602.37	1.65849	0.275859	6.01209	1.83e-09	1.41e-07	2305	3335.84	3186.88	878.62	1382.32	798.225	905.426	900.18	728.879	OLFML2A
gene5211	1632.99	1.02116	0.256705	3.97796	6.95e-05	0.000978072	2588.63	2604.65	2209.34	1225.51	823.788	1353.37	1610.65	1048.01	1232.98	LHX2
gene5273	349.436	-1.18773	0.364709	-3.25665	0.00112736	0.00883871	242.684	193.934	129.27	301.288	609.215	263.885	378.267	460.306	566.08	TTLL11
gene5344	1968.75	2.72018	0.330938	8.21959	2.04e-16	9.8e-14	2738.43	4490.17	6364.15	684.004	937.005	762.091	673.033	575.683	494.183	LOC101105319
gene5370	1948.54	2.14984	0.419891	5.12	3.06e-07	1.06e-05	3363.62	3352.55	5372.72	1021.12	726.745	359.146	1438.62	1132.14	770.199	SDC1
gene5373	533.612	1.43971	0.381382	3.77498	0.00016002	0.00188153	621.19	915.849	1227.53	214.973	503.546	226.656	340.038	280.029	472.697	RHOB
gene5399	435.561	-1.15534	0.29562	-3.90818	9.3e-05	0.00123238	282.632	255.176	180.551	493.46	576.867	330.678	535.207	701.876	563.6	FAM228B
gene5418	151.308	1.39421	0.300308	4.64262	3.44e-06	8.11e-05	165.784	262.599	345.076	105.858	101.356	73.3622	106.639	109.368	91.7297	KIF3C
gene5429	14.0307	-3.37741	0.893622	-3.77946	0.000157171	0.00185451	0.998698	4.63956	0	15.4715	28.0347	25.1841	14.0844	4.80737	33.0557	CIB4
gene5432	328.926	1.63389	0.246256	6.6349	3.25e-11	4.24e-09	596.223	536.333	667.717	180.773	273.877	176.288	186.115	156.24	186.765	SLC35F6
gene5441	481.972	1.80957	0.548632	3.29834	0.000972597	0.0079009	866.87	908.426	986.085	133.544	313.773	676.685	145.874	161.047	145.445	EMILIN1
gene5483	614.015	-1.57189	0.401953	-3.91064	9.21e-05	0.00122083	291.62	357.246	146.364	817.548	875.544	376.666	803.817	1157.37	699.955	SPDYA
gene5495	1894.06	1.55683	0.276996	5.62041	1.91e-08	1e-06	3796.05	2568.46	3783.02	1038.22	1234.6	1673.1	1011.06	1013.15	928.866	LOC105610454
gene5502	68.9561	1.78349	0.477784	3.73285	0.000189327	0.00215103	58.9232	180.943	152.774	57.0003	52.8346	18.6143	30.1809	42.0645	27.271	EHD3
gene5503	297.603	-1.51844	0.350719	-4.32951	1.49e-05	0.000283713	162.788	154.961	80.1261	543.946	295.442	342.722	490.942	299.259	308.245	SNRPG
gene5510	5346.03	1.32956	0.28767	4.62182	3.8e-06	8.88e-05	9100.14	7868.69	9823.45	3472.95	4417.62	4870.38	2864.16	3377.18	2319.69	PCBP1
gene5575	1870.77	-1.40772	0.289379	-4.86464	1.15e-06	3.26e-05	1222.41	815.635	631.393	1952.67	2396.96	2805.28	1957.73	2967.35	2087.47	COMMD1
gene5601	77.4259	-2.89966	0.472026	-6.14301	8.1e-10	7.26e-08	19.974	12.9908	10.6835	76.5433	129.391	189.428	59.3557	114.175	84.2921	CTNNA2
gene5658	153.465	1.85302	0.438545	4.22539	2.39e-05	0.000408865	384.499	323.841	180.551	83.0576	78.7127	33.9437	138.832	94.9456	62.8059	FOXI3
gene5673	513.851	1.73835	0.464543	3.74207	0.00018251	0.00208962	1099.57	817.49	974.333	327.345	108.904	235.416	539.232	352.14	170.237	IL36RN
gene5674	15.0488	-3.67244	1.10258	-3.33077	0.00086606	0.00718978	1.9974	0	3.20504	41.5288	5.39128	3.28488	24.1447	49.2756	6.61115	IL36B
gene5681	397.57	-2.45244	0.452706	-5.41729	6.05e-08	2.71e-06	109.857	88.1516	101.493	394.931	421.598	222.277	940.637	825.666	473.523	IL1A
gene5711	103.558	1.45886	0.340492	4.28457	1.83e-05	0.000334498	185.758	158.673	194.439	38.2717	52.8346	63.5076	98.5908	82.9272	57.0212	EDAR
gene5715	33.962	1.77278	0.485387	3.6523	0.000259906	0.00276869	30.9596	61.2422	100.425	16.2858	16.1738	33.9437	12.0723	18.0276	16.5279	SOWAHC
gene5741	403.531	-2.35372	0.567019	-4.15104	3.31e-05	0.000539181	90.8815	106.71	126.065	651.432	480.902	76.6471	548.286	877.345	673.511	CCDC85A
gene5745	2123.72	-1.23055	0.364566	-3.37539	0.000737116	0.00630931	1114.55	1298.15	944.419	2281.64	2820.72	1144.23	2585.49	3724.51	3199.8	PNPT1
gene5755	279.395	2.87229	0.555222	5.17323	2.3e-07	8.36e-06	424.447	617.061	933.736	70.029	125.078	16.4244	154.928	74.5143	98.3408	LOC106990985
gene5772	215.291	-2.30278	0.417596	-5.51437	3.5e-08	1.68e-06	67.9115	62.1701	48.0756	249.987	310.538	113.876	285.712	466.315	333.037	NRXN1
gene5802	3273.64	1.33228	0.268954	4.95357	7.29e-07	2.22e-05	5518.81	4310.15	6591.7	2318.29	1996.93	1553.75	2924.53	2312.35	1936.24	EPCAM
gene5805	115.199	-1.88504	0.571232	-3.29996	0.000966974	0.00787685	44.9414	52.891	25.6403	102.601	146.643	28.4689	231.387	219.937	184.286	C3H2orf61
gene582	667.658	-2.1713	0.638811	-3.39897	0.000676401	0.00590537	162.788	264.455	173.072	723.09	1365.07	79.932	769.612	1118.92	1351.98	SGIP1
gene5836	416.57	-1.09086	0.270102	-4.0387	5.37e-05	0.00079939	245.68	269.094	197.644	369.688	391.407	493.826	546.274	616.545	618.969	DYNC2LI1
gene586	140.152	-1.57985	0.466235	-3.38852	0.000702706	0.00606939	69.9089	73.305	37.3922	166.93	127.234	71.1723	165.995	280.029	269.404	WDR78
gene5890	636.618	1.38912	0.384708	3.61083	0.000305217	0.00317147	1005.69	1045.76	1197.62	390.859	478.746	148.914	558.346	421.847	481.787	LOC101119456
gene5896	1365.61	1.00841	0.253178	3.983	6.81e-05	0.000962126	1935.48	1982.02	2245.67	1042.29	1006.01	653.69	1019.11	1311.21	1094.97	CDC42EP3
gene5913	21.7153	2.34139	0.663584	3.52841	0.000418072	0.00406578	24.9675	38.0444	76.921	4.07145	18.3304	5.47479	2.01206	13.2203	12.3959	LOC105614651
gene5921	416.408	-1.23211	0.345407	-3.56713	0.000360915	0.00364362	169.779	242.185	245.72	486.131	593.041	241.986	522.129	668.225	578.475	RASGRP3
gene5943	1199.5	1.64925	0.276445	5.96594	2.43e-09	1.83e-07	1753.71	2021.92	2817.23	853.376	843.197	673.4	747.48	495.159	590.045	LOC101106246
gene5951	4162.34	1.94441	0.554482	3.5067	0.000453692	0.00435495	8851.46	8701.96	7098.1	3781.57	1247.54	419.369	2869.19	2802.7	1689.15	ATP6V1B1
gene596	3955.37	1.21881	0.25506	4.77853	1.77e-06	4.64e-05	5977.21	6147.42	7021.18	2955.87	3684.4	2719.88	2177.05	2936.1	1979.21	WLS
gene5963	6993.7	-2.27037	0.553056	-4.10514	4.04e-05	0.000633324	2040.34	2635.27	1235.01	9959.59	11387.5	1474.91	9223.27	12964.3	12023.2	EXOC6B
gene5990	1225.62	-1.12783	0.26907	-4.19159	2.77e-05	0.000463182	769.996	852.751	430.544	1317.52	1431.92	1824.2	1488.92	1420.58	1494.12	DGUOK
gene5994	230.925	-1.59963	0.32957	-4.8537	1.21e-06	3.38e-05	86.8867	142.898	64.1008	305.359	335.338	206.947	247.483	352.14	337.169	MTHFD2
gene6017	25.0618	-1.5363	0.434672	-3.5344	0.00040871	0.00400987	13.9818	7.4233	11.7518	26.8716	26.9564	33.9437	25.1507	48.0737	31.403	M1AP
gene602	169.251	-3.14613	0.513053	-6.13216	8.67e-10	7.7e-08	14.9805	50.1072	16.0252	213.344	447.476	122.635	229.375	197.102	232.217	LRRC7
gene6042	95.7616	-1.7471	0.425344	-4.10749	4e-05	0.000628578	19.974	50.1072	41.6655	86.3148	128.313	85.4068	151.91	97.3493	200.814	IL1RL1
gene6050	344.009	1.21348	0.2537	4.7831	1.73e-06	4.55e-05	393.487	558.603	710.451	214.158	207.025	229.941	252.513	257.194	272.71	CREG2
gene6053	1436.91	-1.14823	0.259225	-4.42948	9.45e-06	0.000191268	689.102	973.38	717.929	1744.21	1831.96	1440.97	1621.72	1462.64	2450.26	TBC1D8
gene606	3.30139	4.12173	1.2797	3.22086	0.00127807	0.00971649	5.99219	5.56747	14.9569	0	0	2.18992	1.00603	0	0	HHLA3
gene6072	2496.04	2.39879	0.440851	5.44129	5.29e-08	2.41e-06	6000.18	4343.56	5943.22	999.949	420.52	1945.74	964.782	1175.4	671.032	LYG2
gene6086	66.2836	-2.20661	0.364755	-6.04957	1.45e-09	1.17e-07	18.9753	13.9187	25.6403	84.6862	86.2605	135.775	79.4763	73.3124	78.5074	VWA3B
gene6094	552.639	1.4238	0.20581	6.91802	4.58e-12	7.53e-10	988.711	953.893	907.027	349.331	312.694	377.761	452.713	307.672	323.946	SEMA4C
gene6105	680.347	1.10252	0.336986	3.27171	0.00106901	0.00849371	972.732	1003.07	1194.41	545.575	353.668	840.928	463.779	386.993	361.96	ITPRIPL1
gene6109	457.039	2.09786	0.269739	7.77736	7.41e-15	2.8e-12	759.011	894.507	1150.61	201.944	239.373	190.523	287.724	157.441	232.217	TMEM127
gene6114	43.8624	1.26941	0.28421	4.46646	7.95e-06	0.000165131	72.905	69.5934	73.716	36.6431	29.1129	22.9941	29.1748	30.0461	30.5766	ADRA2B
gene6118	2539.66	1.35796	0.344731	3.93918	8.18e-05	0.00110916	4783.76	3754.33	4301.17	2464.86	2013.1	1985.16	1435.6	1169.39	949.526	PROM2
gene6126	1431.6	1.71872	0.34236	5.02021	5.16e-07	1.65e-05	3038.04	1906.86	3069.36	833.019	988.761	1172.7	815.889	556.453	503.274	MALL
gene6161	95.678	-1.68149	0.443885	-3.78811	0.000151798	0.00181157	34.9544	58.4585	22.4353	121.329	139.095	52.558	108.651	168.258	155.362	TRHDE
gene6166	2433.79	1.22016	0.358833	3.40035	0.000673005	0.0058824	4120.63	3182.74	4482.79	1850.88	2384.03	760.996	1972.82	1742.67	1406.52	ATXN7L3B
gene6172	138.129	-1.31039	0.251048	-5.21967	1.79e-07	6.82e-06	81.8933	59.3864	67.3059	153.901	147.721	217.897	183.097	165.854	166.105	GLIPR1
gene6188	1706.87	-1.82761	0.485385	-3.76527	0.000166367	0.00193473	464.395	941.831	490.371	1799.58	3548.54	693.109	1889.32	2331.58	3203.1	NAV3
gene6191	489.438	-2.01195	0.53553	-3.75693	0.000172012	0.00198608	161.789	245.897	77.9894	549.646	707.336	165.339	722.329	659.812	1114.8	SYT1
gene6203	207.711	-1.31599	0.394847	-3.3329	0.000859457	0.00715194	113.852	76.0888	122.86	278.487	290.051	114.971	386.315	288.442	198.334	LIN7A
gene6208	219.507	-1.19585	0.337652	-3.54167	0.000397607	0.00393135	108.858	124.34	120.723	267.902	240.451	136.87	372.231	338.92	265.272	PPFIA2
gene6217	41.882	-3.91148	0.795897	-4.91456	8.9e-07	2.64e-05	4.99349	1.85582	5.34174	39.0859	53.9128	8.75967	107.645	118.982	36.3613	LOC101104054
gene6224	37.1172	-1.79309	0.54794	-3.27243	0.00106629	0.00847972	24.9675	6.49538	10.6835	39.0859	37.739	25.1841	84.5064	64.8995	40.4933	LRRIQ1
gene6227	13.4582	-5.80111	1.52442	-3.80545	0.000141544	0.00171691	0	0.927912	0	1.62858	17.2521	18.6143	5.03014	66.1014	11.5695	NTS
gene6228	239.661	-3.90902	0.727342	-5.37439	7.68e-08	3.32e-06	27.9635	22.2699	19.2303	133.544	258.782	93.0715	96.5788	689.858	815.65	MGAT4C
gene623	209.66	-2.1768	0.669978	-3.24906	0.00115787	0.00901058	103.865	59.3864	24.572	283.373	447.476	28.4689	257.543	313.681	368.572	LOC101120030
gene624	12.6707	-3.18016	0.779508	-4.0797	4.51e-05	0.000693927	1.9974	1.85582	2.13669	26.8716	11.8608	8.75967	13.0784	27.6424	19.8334	ERICH3
gene6270	1137.39	-1.11262	0.328341	-3.38861	0.000702475	0.00606939	775.988	616.134	529.9	1180.72	1458.88	1480.38	879.269	2192.16	1123.07	MRPL42
gene6271	612.971	1.72968	0.202947	8.52283	1.56e-17	9.22e-15	1343.25	1002.14	1095.06	339.559	334.26	360.241	339.032	409.828	293.37	SOCS2
gene6272	1000.69	-1.62881	0.483423	-3.36933	0.000753522	0.0064332	562.267	410.137	280.975	1683.14	1427.61	318.633	1455.72	1719.84	1147.86	CRADD
gene628	14.4886	2.77563	0.732392	3.78982	0.000150756	0.00180278	37.9505	47.3235	14.9569	0.814291	5.39128	9.85463	2.01206	9.61474	2.47918	LHX8
gene6299	827.517	1.28575	0.208334	6.17161	6.76e-10	6.24e-08	1295.31	1375.17	1421.97	629.447	470.12	640.551	576.455	438.673	599.962	ZNF385A
gene6304	2402.69	1.0343	0.240976	4.29212	1.77e-05	0.00032533	3029.05	3782.17	4129.16	1694.54	2006.64	2214.01	1928.56	1401.35	1438.75	CBX5
gene631	996.261	-1.72872	0.285869	-6.04723	1.47e-09	1.18e-07	429.44	511.279	233.968	1112.32	1276.66	1388.41	1172.02	1543.17	1299.09	RABGGTB
gene6318	60.8292	-3.30577	0.50689	-6.52167	6.95e-11	8.07e-09	12.9831	1.85582	11.7518	61.0718	117.53	107.306	99.5969	70.9087	64.4587	HOXC10
gene6320	37.1929	-3.51711	0.584732	-6.01492	1.8e-09	1.39e-07	4.99349	3.71165	5.34174	52.1146	62.5389	96.3564	46.2773	33.6516	29.7502	HOXC11
gene6323	3118.04	1.64953	0.395598	4.1697	3.05e-05	0.000502888	5697.57	5112.79	6326.75	1994.2	1644.34	3487.44	1059.35	1551.58	1188.35	HOXC13
gene6326	1827.7	1.05259	0.272818	3.85822	0.000114216	0.00144154	2516.72	2432.06	3426.19	1325.67	1166.67	1656.67	1720.31	929.025	1275.95	CALCOCO1
gene6330	159.795	-2.3231	0.533591	-4.35372	1.34e-05	0.000257514	53.9297	59.3864	17.0936	248.359	115.373	439.078	227.363	147.827	129.744	NPFF
gene6337	24.8954	1.56873	0.432612	3.62618	0.000287643	0.00302783	36.9518	39.9002	56.6224	17.1001	9.70431	20.8042	13.0784	21.6332	8.26394	SP7
gene634	375.355	-2.04587	0.417014	-4.90599	9.3e-07	2.72e-05	109.857	180.943	73.716	444.603	612.45	234.321	426.556	724.711	571.038	ST6GALNAC3
gene6344	1977.09	1.36445	0.369547	3.69223	0.000222298	0.00246262	3284.72	3409.15	3321.49	1859.03	1069.63	577.043	1815.88	1235.49	1221.41	RARG
gene6352	4381.24	1.17796	0.365612	3.22189	0.00127349	0.00970171	6125.02	6151.13	8653.61	2909.46	2949.03	5689.41	2597.57	2275.09	2080.86	EIF4B
gene6358	10357.8	2.40155	0.713349	3.36658	0.000761068	0.00648204	22672.4	27457.8	17493.1	5239.15	2247.09	240.891	8411.41	5360.22	4098.09	KRT79
gene6367	7091.92	2.56129	0.707765	3.61884	0.000295928	0.00310035	20736	10676.6	16260.2	1496.67	2429.31	9041.07	1128.76	1272.75	785.9	KRT72
gene6368	2037.53	1.25795	0.329031	3.82318	0.00013174	0.00161787	3585.33	2904.36	3496.7	1525.98	2022.81	1582.22	1468.8	840.088	911.512	KRT74
gene6369	51669.7	2.74672	0.413888	6.63637	3.21e-11	4.23e-09	147982	95093.3	115195	19836.9	31514.2	13899.4	9701.14	21307.5	10498.5	KRT71
gene6370	75494.5	1.94686	0.385758	5.04685	4.49e-07	1.47e-05	144510	181304	121558	43057.2	38610.2	67318.1	32997.8	31002.7	19093	KRT5
gene6371	11985	1.56602	0.346477	4.51985	6.19e-06	0.000134179	24385.2	16962.2	23030.4	7454.02	11209.6	6924.52	5742.41	8272.29	3884.05	LOC101112304
gene6372	374.614	-3.21907	0.565051	-5.69695	1.22e-08	7.1e-07	35.9531	54.7468	81.1944	654.69	412.972	478.497	1019.11	522.802	111.563	LOC101111178
gene6375	2529.56	2.33568	0.539578	4.32871	1.5e-05	0.000284256	5644.64	4032.71	6628.03	983.663	778.501	2824.99	732.389	504.774	636.323	KRT82
gene6376	1286.03	2.04908	0.450751	4.54591	5.47e-06	0.000121416	3163.88	1848.4	2791.59	1170.14	619.998	831.074	318.911	348.534	481.787	KRT84
gene6383	3349.18	3.07606	0.538936	5.70765	1.15e-08	6.78e-07	7675.99	4835.35	11853.3	1211.66	1485.84	1398.26	632.792	227.148	822.262	LOC101113055
gene6389	766.29	-2.67079	0.542259	-4.9253	8.42e-07	2.51e-05	117.846	150.322	233.968	288.259	1744.62	569.379	1260.55	1683.78	847.88	NR4A1
gene640	98.8199	-1.86069	0.426244	-4.36531	1.27e-05	0.000247178	35.9531	51.9631	19.2303	84.6862	147.721	111.686	106.639	219.937	111.563	AK5
gene6430	590.615	-1.61456	0.462739	-3.48913	0.00048459	0.00458218	395.484	161.457	189.097	494.274	435.616	1491.33	637.822	808.84	701.608	GPD1
gene6434	501.812	1.15457	0.31627	3.6506	0.000261631	0.00278373	735.042	794.293	849.336	390.859	312.694	580.328	254.525	338.92	260.314	RACGAP1
gene6454	12.8031	1.93779	0.543737	3.56383	0.000365482	0.00368169	20.9727	22.2699	32.0504	4.88574	9.70431	8.75967	2.01206	9.61474	4.95836	PRPH
gene6455	1254.54	1.72085	0.3772	4.56216	5.06e-06	0.000113953	2477.77	1724.06	2824.71	521.146	667.441	1339.13	558.346	663.417	514.843	LOC101119713
gene6474	583.34	1.04632	0.300123	3.48629	0.000489761	0.00462124	930.787	901.003	835.448	441.345	353.668	670.115	447.683	282.433	387.579	CACNB3
gene6509	48.9852	3.34303	0.758477	4.40755	1.05e-05	0.00020743	271.646	36.1886	59.8275	8.9572	10.7826	17.5193	9.05426	25.2387	1.65279	CCDC184
gene6512	1059.96	1.34796	0.303421	4.44256	8.89e-06	0.000181032	1708.77	1583.02	2050.16	670.975	584.415	1145.33	676.051	593.71	527.239	PFKM
gene6519	482.442	1.23468	0.277675	4.44648	8.73e-06	0.000178593	829.918	622.629	894.207	254.059	263.095	458.788	386.315	330.507	302.46	SLC48A1
gene6564	47.5717	-1.59407	0.474399	-3.3602	0.000778873	0.00659573	20.9727	25.9815	13.8885	59.4432	60.3824	29.5639	81.4883	37.2571	99.1672	C3H12orf40
gene6565	86.5077	-1.62637	0.378113	-4.30128	1.7e-05	0.000313139	38.9492	25.0536	44.8706	112.372	108.904	63.5076	94.5667	122.588	167.758	ABCD2
gene6569	2079.51	-2.17931	0.556153	-3.91855	8.91e-05	0.00119214	617.195	664.385	579.044	3257.16	3049.31	353.672	3301.79	3510.58	3382.43	CPNE8
gene6595	33.3481	-3.9969	1.06347	-3.75834	0.000171045	0.00197748	0	2.78374	6.41008	153.087	25.8782	6.56975	54.3256	44.4682	6.61115	LOC443322
gene6621	556.669	-1.55327	0.480222	-3.23449	0.00121861	0.00935988	227.703	264.455	237.173	684.818	1054.53	164.244	739.431	679.041	958.616	GRIP1
gene6628	117.002	-4.96278	0.942971	-5.26292	1.42e-07	5.61e-06	10.9857	5.56747	0	83.8719	121.843	24.0891	176.055	76.918	553.684	HMGA2
gene663	726.468	-1.34811	0.355224	-3.79509	0.00014759	0.00177808	276.639	376.732	419.861	591.989	1291.75	625.221	678.064	1223.48	1054.48	ADGRL4
gene6660	147.218	-2.55728	0.432634	-5.91096	3.4e-09	2.38e-07	36.9518	39.9002	26.7087	192.987	221.043	84.3118	280.682	294.452	147.924	FAM19A2
gene6674	1606.61	1.48542	0.257592	5.76656	8.09e-09	4.97e-07	1976.42	3064.89	3394.14	1144.08	858.292	921.955	1218.3	850.905	1030.51	CTDSP2
gene6708	117.255	2.04669	0.390209	5.24512	1.56e-07	6.08e-06	253.669	171.664	286.317	66.7718	28.0347	78.837	74.4461	36.0553	59.5003	NXPH4
gene6709	3295.59	1.60999	0.421396	3.82061	0.00013312	0.00163256	4145.6	7675.69	6098.13	1534.12	2089.66	3415.18	1966.79	822.061	1913.1	LRP1
gene6711	1675.71	1.02324	0.312271	3.27676	0.00105004	0.00838429	2564.66	2244.62	2792.66	1381.85	843.197	1682.95	1546.27	787.207	1237.94	STAT6
gene6712	1466.98	1.86598	0.203675	9.16156	5.12e-20	5.34e-17	3370.61	2545.26	2609.97	850.119	727.823	900.056	793.757	646.592	758.629	NAB2
gene6728	1612.25	-1.38903	0.272742	-5.09283	3.53e-07	1.2e-05	867.869	884.3	573.703	2746.6	1866.46	1553.75	1857.13	2329.17	1831.29	NACA
gene6744	2312.81	1.04549	0.262401	3.98434	6.77e-05	0.000958232	3123.93	3314.5	4133.44	1656.27	1607.68	2430.81	1728.36	1229.49	1590.81	CS
gene6746	251.137	1.75033	0.359463	4.8693	1.12e-06	3.2e-05	299.609	641.187	477.551	183.215	129.391	97.4513	183.097	92.5419	156.188	ANKRD52
gene6775	1136.97	1.16872	0.287153	4.07001	4.7e-05	0.000719057	1751.72	1660.03	2003.15	721.461	810.849	1216.5	863.173	587.701	618.142	DNAJC14
gene6777	3505.34	-1.55935	0.427088	-3.65113	0.000261087	0.00277961	2192.14	1553.32	830.106	3502.26	4011.11	8192.48	2720.3	4954	3592.33	SARNP
gene6888	424.791	-1.89159	0.42078	-4.49543	6.94e-06	0.000147127	163.787	180.015	110.04	715.761	421.598	225.562	679.07	838.886	488.399	ANKS1B
gene6919	822.377	-1.17126	0.363781	-3.21968	0.00128336	0.00973508	539.297	497.361	307.684	827.319	1300.38	539.815	940.637	1477.07	971.839	NUP37
gene6930	6.92856	4.81922	1.22104	3.94683	7.92e-05	0.00107765	5.99219	38.0444	13.8885	0	0	0	0	3.60553	0.826394	LOC101110666
gene6936	110.221	-1.26514	0.377916	-3.34768	0.000814905	0.00683566	68.9102	68.6655	33.1188	96.0863	129.391	112.781	143.862	120.184	218.994	LOC101123368
gene695	262.689	-1.458	0.453647	-3.21394	0.00130926	0.00988937	133.826	115.989	114.313	512.189	386.016	91.9765	306.839	374.975	328.078	DDAH1
gene6950	473.422	-2.00818	0.51285	-3.91572	9.01e-05	0.00120257	142.814	246.825	81.1944	992.62	745.075	178.478	551.304	741.537	580.955	CHST11
gene6976	7099.63	1.20713	0.274307	4.40063	1.08e-05	0.000212969	10858.8	9721.73	13657.8	4883.3	6495.42	5145.21	4893.32	3082.73	5158.35	SYN3
gene6996	14.4503	2.68039	0.642742	4.17024	3.04e-05	0.000502163	30.9596	27.8374	40.5972	6.51432	7.5478	0	10.0603	2.40369	4.13197	RASD2
gene7	894.844	1.20675	0.309746	3.89592	9.78e-05	0.00128112	1469.09	1320.42	1525.6	679.933	490.607	988.748	587.521	407.425	584.26	ATG4B
gene7012	5532.83	1.89935	0.321207	5.91316	3.36e-09	2.36e-07	9113.12	11005	12298.8	3293.81	3781.45	1662.15	3473.82	2044.33	3122.94	MYH9
gene7015	274.758	1.32918	0.234617	5.66531	1.47e-08	8.22e-07	407.469	500.145	470.073	181.587	180.069	142.345	218.308	153.836	218.994	FOXRED2
gene7023	60.121	-1.88721	0.580705	-3.24985	0.00115465	0.00899708	24.9675	22.2699	17.0936	31.7573	57.1476	192.713	45.2713	56.4866	93.3825	NCF4
gene7151	989.634	-2.3047	0.611917	-3.76636	0.000165646	0.00192962	299.609	384.156	134.612	1030.08	1869.7	170.814	1478.86	1701.81	1837.07	PDE3A
gene7171	167.118	-1.21681	0.302875	-4.01755	5.88e-05	0.000856676	88.8841	69.5934	107.903	153.901	246.921	183.953	154.928	260.8	237.175	RERGL
gene7183	81.4356	-1.83875	0.464959	-3.95464	7.67e-05	0.00104865	15.9792	33.4048	40.5972	172.63	128.313	107.306	49.2954	109.368	76.0282	PTPRO
gene7189	10608.5	-2.09581	0.43393	-4.82983	1.37e-06	3.73e-05	4081.68	2173.17	3743.49	7004.53	19200.5	25502.7	10614.6	11006.5	12149.6	MGP
gene7191	93.5496	-2.43402	0.396757	-6.1348	8.53e-10	7.61e-08	22.9701	18.5582	29.9137	109.929	211.338	155.484	103.621	90.1382	99.9936	ART4
gene7192	34.4103	-1.50156	0.424796	-3.53478	0.000408113	0.00400844	15.9792	9.27912	21.3669	37.4574	66.8519	44.8933	30.1809	45.67	38.0141	C3H12orf60
gene7194	1564.96	1.19827	0.197661	6.06222	1.34e-09	1.12e-07	2574.64	2161.11	2789.46	1012.16	1328.41	1073.06	1169.01	1010.75	966.054	WBP11
gene7197	513.678	-1.2452	0.382758	-3.25324	0.00114098	0.00891398	235.693	330.337	239.31	781.719	682.536	248.556	660.961	596.114	847.88	GUCY2C
gene7203	157.809	-3.65888	0.615366	-5.94585	2.75e-09	2.02e-07	13.9818	25.0536	14.9569	341.188	495.998	59.1278	170.019	145.423	154.536	GRIN2B
gene7216	423.16	-2.54742	0.599719	-4.24769	2.16e-05	0.000378999	58.9232	100.214	141.022	339.559	1305.77	388.71	198.188	325.699	950.353	APOLD1
gene7231	24.9515	-1.87815	0.440316	-4.26546	1.99e-05	0.000358196	11.9844	8.35121	6.41008	30.1288	42.052	41.6084	27.1628	31.2479	25.6182	BCL2L14
gene7255	7704.62	1.18073	0.231397	5.10262	3.35e-07	1.14e-05	15638.6	9824.73	11375.8	5094.2	5863.56	5711.31	6147.84	5373.44	4312.12	LOC101122777
gene7278	292.993	-2.02769	0.294364	-6.88835	5.64e-12	9.11e-10	89.8828	102.07	96.1513	336.302	493.842	312.063	334.002	317.287	555.336	CLEC1A
gene7287	144.051	-2.81918	0.488247	-5.77408	7.74e-09	4.84e-07	29.9609	18.5582	37.3922	175.887	157.425	76.6471	242.453	371.369	186.765	LOC101120999
gene7288	98.2845	-2.23176	0.389113	-5.7355	9.72e-09	5.86e-07	16.9779	29.6932	38.4605	133.544	112.139	109.496	163.983	193.497	86.7713	LOC101102973
gene734	153.237	-1.39678	0.367219	-3.80367	0.000142566	0.00172785	91.8802	64.0259	64.1008	192.173	325.633	122.635	189.133	189.891	139.661	LOC101114579
gene735	492.316	-1.26509	0.342067	-3.69836	0.000216994	0.0024144	180.764	283.013	299.137	421.803	941.318	719.388	430.58	554.05	600.788	LOC101120875
gene7359	1816.38	1.18069	0.215685	5.47416	4.4e-08	2.06e-06	2818.33	2998.08	2868.51	1125.35	1374.78	1481.48	1471.82	944.649	1264.38	ATN1
gene7363	93.1169	1.5443	0.26205	5.89317	3.79e-09	2.62e-07	202.736	121.556	173.072	54.5575	59.3041	56.9379	60.3617	51.6793	57.8475	LOC105614924
gene7366	1037.6	1.79663	0.39603	4.53659	5.72e-06	0.000125337	2041.34	1769.53	2115.33	508.117	510.015	1105.91	586.515	341.323	360.308	USP5
gene7376	612.018	1.4373	0.304635	4.71812	2.38e-06	5.97e-05	1185.45	948.326	1034.16	347.702	445.32	590.183	399.393	269.213	288.411	COPS7A
gene7381	19.3248	1.55153	0.471661	3.2895	0.00100365	0.00809762	20.9727	42.6839	39.5289	14.6572	15.0956	15.3294	9.05426	10.8166	5.78475	LPAR5
gene7382	6218.42	1.2616	0.312703	4.03449	5.47e-05	0.000811435	11467.1	9145.5	9900.38	4021.78	4138.35	6825.97	4125.72	2653.67	3687.37	CHD4
gene739	548.946	-1.95144	0.368313	-5.29831	1.17e-07	4.76e-06	115.849	204.141	245.72	532.546	1068.55	478.497	711.262	639.38	944.568	LRRC8C
gene7404	13.0682	2.84301	0.701844	4.05076	5.11e-05	0.000769575	33.9557	25.9815	32.0504	2.44287	2.15651	12.0445	4.02412	0	4.95836	KCNA1
gene7416	1277.23	1.22152	0.207823	5.87771	4.16e-09	2.85e-07	2251.07	2038.62	1898.45	848.491	899.266	1089.48	885.305	677.839	906.554	CCND2
gene7428	329.788	1.35134	0.340606	3.96744	7.26e-05	0.00101024	499.349	558.603	605.753	240.216	255.547	347.102	155.934	150.23	155.362	RHNO1
gene7429	81.173	1.80219	0.327881	5.49648	3.87e-08	1.85e-06	132.827	158.673	172.004	42.3431	38.8172	67.8874	38.2291	51.6793	28.0974	FOXM1
gene7441	1181.28	1.85364	0.536778	3.45328	0.000553823	0.0050852	2496.75	2090.59	2256.35	486.946	432.381	1723.47	424.544	372.571	347.912	B4GALNT3
gene7470	870.078	1.42083	0.298408	4.76137	1.92e-06	4.98e-05	1599.91	1560.75	1322.61	811.033	404.346	653.69	573.437	380.984	523.933	PEX26
gene7472	126.697	2.04942	0.363108	5.64411	1.66e-08	9.11e-07	345.55	166.096	257.472	65.1432	30.1912	72.2673	68.41	64.8995	70.2434	TUBA8
gene7476	931.767	1.16541	0.354791	3.28478	0.00102064	0.00820484	1847.59	1207.21	1378.17	635.147	583.337	1143.14	659.955	407.425	523.933	GGA1
gene7479	305.905	1.34005	0.257591	5.20225	1.97e-07	7.36e-06	550.283	428.695	558.746	201.13	238.295	226.656	235.411	174.267	139.661	PDXP
gene7485	2928.74	2.40049	0.281041	8.54144	1.33e-17	8.12e-15	6527.49	5032.99	7556.42	1195.38	1762.95	1306.29	981.884	963.878	1031.34	LOC101102223
gene7490	1754.97	1.2692	0.222408	5.70664	1.15e-08	6.8e-07	2876.25	3069.53	2686.89	1317.52	1039.44	1315.05	1448.68	889.364	1151.99	MICALL1
gene7500	183.467	1.78049	0.507074	3.5113	0.000445925	0.00428967	233.695	322.913	487.166	63.5147	161.738	28.4689	126.76	88.9364	138.008	MAFF
gene7512	625.241	1.1787	0.250798	4.6998	2.6e-06	6.47e-05	745.029	989.154	1253.17	417.731	445.32	349.292	475.852	538.426	413.197	JOSD1
gene7514	3654.52	2.04055	0.26263	7.76966	7.87e-15	2.91e-12	7349.42	6393.31	8389.73	2343.53	1640.03	1767.26	2223.32	1343.66	1440.4	SUN2
gene7515	128.564	1.69477	0.268957	6.30128	2.95e-10	3.03e-08	260.66	215.276	239.31	79.8005	104.591	66.7925	71.4281	58.8903	60.3267	DNAL4
gene7517	66.3098	1.94327	0.437769	4.43902	9.04e-06	0.000183615	147.807	114.133	130.338	18.7287	57.1476	14.2345	43.2592	37.2571	33.8821	CBX6
gene7526	705.005	1.26241	0.310231	4.06927	4.72e-05	0.000720622	1291.32	1068.03	1100.4	421.803	472.276	782.896	492.954	377.379	337.995	TAB1
gene7527	23.7289	2.94934	0.655201	4.50142	6.75e-06	0.000143726	54.9284	28.7653	85.4678	5.70003	1.07826	6.56975	6.03617	19.2295	5.78475	MGAT3
gene7554	164.655	1.88933	0.333901	5.65835	1.53e-08	8.51e-07	354.538	304.355	303.411	114.001	104.591	52.558	100.603	94.9456	52.8892	LOC101102895
gene7557	715.569	1.14101	0.216646	5.26669	1.39e-07	5.52e-06	1028.66	1178.45	1170.91	580.589	456.103	489.447	642.853	414.636	478.482	ZC3H7B
gene7559	1688.79	1.26568	0.244167	5.18366	2.18e-07	8e-06	2809.34	2522.06	2965.73	1034.15	944.553	1626.01	1242.45	987.915	1066.87	TEF
gene7560	2052.07	1.50781	0.268216	5.62162	1.89e-08	1e-06	3796.05	3304.29	3742.42	1086.26	1205.49	1910.7	1234.4	938.639	1250.33	TOB2
gene7565	1034.04	2.74302	0.411426	6.66709	2.61e-11	3.59e-09	2073.3	1862.32	3229.61	328.159	445.32	652.595	238.429	242.772	233.869	CSDC2
gene7567	1200.83	1.25284	0.279512	4.48223	7.39e-06	0.00015487	1997.4	1597.86	2280.92	878.62	490.607	955.899	959.752	886.96	759.456	DESI1
gene7573	5722.49	1.43216	0.219121	6.53594	6.32e-11	7.43e-09	10689.1	9293.97	9596.96	3360.58	3027.74	4540.79	3896.35	2975.76	4121.22	SREBF2
gene7581	208.227	1.45404	0.367202	3.95978	7.5e-05	0.00102943	285.628	360.958	436.954	122.958	169.286	55.8429	164.989	126.194	151.23	FAM109B
gene7605	43.4021	-2.5765	0.445934	-5.77776	7.57e-09	4.75e-07	8.98828	6.49538	14.9569	61.8861	40.9737	85.4068	42.2532	68.5051	61.1531	SCUBE1
gene7619	772.418	1.11387	0.21785	5.11303	3.17e-07	1.09e-05	923.796	1162.67	1526.67	540.689	582.259	585.803	586.515	511.985	531.371	LDOC1L
gene7621	85.9828	-1.3866	0.431757	-3.21152	0.00132034	0.00994346	53.9297	51.9631	18.1619	99.3434	111.06	56.9379	143.862	99.753	138.834	PHF21B
gene7626	82.517	-1.63362	0.469104	-3.48243	0.000496878	0.00467845	33.9557	44.5398	24.572	85.5005	112.139	63.5076	78.4703	79.3216	220.647	SMC1B
gene7639	42.416	1.2005	0.362657	3.31029	0.000931999	0.00763397	79.8959	53.8189	70.5109	35.8288	16.1738	40.5135	32.1929	28.8442	23.9654	LOC101110050
gene7640	450.577	1.27782	0.380998	3.35388	0.00079687	0.00672248	694.095	738.618	789.509	384.345	246.921	133.585	397.381	430.26	240.481	TTC38
gene7644	93.6063	2.41835	0.639052	3.78429	0.000154151	0.00183285	108.858	254.248	249.993	61.8861	36.6607	6.56975	61.3678	50.4774	12.3959	LOC105614885
gene7646	1386.79	1.46489	0.355213	4.12396	3.72e-05	0.00059259	1782.68	2628.77	2826.85	1271.11	623.232	532.15	1188.12	717.5	910.686	LOC101111090
gene7657	197.222	1.70228	0.399275	4.26343	2.01e-05	0.000361051	209.727	426.839	463.663	160.415	101.356	58.0328	128.772	86.5327	139.661	ZBED4
gene7664	307.469	1.26984	0.352984	3.59746	0.000321346	0.00331001	594.225	441.686	476.483	215.787	147.721	344.912	245.471	167.056	133.876	PANX2
gene7665	303.276	1.67456	0.371433	4.50836	6.53e-06	0.00014011	691.099	478.803	507.465	133.544	205.947	284.689	189.133	145.423	93.3825	TRABD
gene7688	4.67684	-5.26982	1.5994	-3.29486	0.000984691	0.00796614	0	0	0	0.814291	5.39128	3.28488	5.03014	3.60553	23.9654	ACR
gene77	44.7326	-1.52953	0.370221	-4.1314	3.61e-05	0.00057943	25.9662	19.4862	13.8885	45.6003	51.7563	76.6471	51.3075	46.8719	71.0698	IQCA1
gene7704	12.9739	-4.25364	0.976394	-4.35647	1.32e-05	0.000255962	0.998698	1.85582	0	15.4715	17.2521	24.0891	13.0784	32.4498	11.5695	LOC105614180
gene7710	1153.06	-1.32293	0.285235	-4.63803	3.52e-06	8.27e-05	570.257	720.06	438.022	1368.01	1623.85	1645.72	1606.63	889.364	1515.61	GRB10
gene7711	27.7579	-1.86357	0.568827	-3.27617	0.00105225	0.00839811	11.9844	15.7745	2.13669	25.243	45.2868	48.1782	52.3135	21.6332	27.271	DDC
gene7727	1115	1.56824	0.308709	5.07998	3.77e-07	1.27e-05	1798.66	1847.47	2346.09	525.217	684.693	1088.39	530.177	686.252	528.065	FZD1
gene7734	76.4858	-1.55492	0.41047	-3.78814	0.000151782	0.00181157	37.9505	35.2607	26.7087	88.7577	111.06	43.7984	93.5607	156.24	95.0353	LRRD1
gene7749	11.0207	-3.55725	0.966511	-3.6805	0.000232776	0.00255478	0.998698	0	3.20504	29.3145	14.0173	8.75967	5.03014	18.0276	19.8334	HEPACAM2
gene7763	51.2215	3.21098	0.740626	4.33549	1.45e-05	0.000277108	37.9505	153.105	188.029	15.4715	24.7999	0	16.0965	15.624	9.91672	PEG10
gene7765	221.211	-1.32734	0.402866	-3.29474	0.000985113	0.00796614	96.8737	120.629	113.245	203.573	345.042	105.116	337.02	328.103	341.301	PPP1R9A
gene7772	2208.05	-2.10392	0.491932	-4.27684	1.9e-05	0.000342677	469.388	450.965	1150.61	1992.57	2346.29	2516.22	2236.4	2136.88	6573.13	PDK4
gene7774	165.006	-1.79826	0.415287	-4.33016	1.49e-05	0.000283293	61.9193	80.7283	43.8022	178.33	309.46	87.5967	229.375	234.359	259.488	DYNC1I1
gene7781	407.442	-1.41682	0.314234	-4.5088	6.52e-06	0.000139995	248.676	180.943	148.5	477.174	654.502	705.153	433.598	463.911	354.523	SDHAF3
gene7784	117.642	-2.0419	0.507075	-4.02682	5.65e-05	0.000831097	44.9414	56.6026	12.8202	105.043	157.425	212.422	231.387	74.5143	163.626	TAC1
gene7798	164.534	-3.43076	0.640136	-5.35942	8.35e-08	3.55e-06	23.9688	37.1165	4.27339	135.987	226.434	70.0774	387.321	348.534	247.092	NXPH1
gene7803	847.56	-1.91277	0.531458	-3.59909	0.000319328	0.00329113	327.573	336.832	229.695	1169.32	1974.29	215.707	951.703	1383.32	1039.6	THSD7A
gene7806	3.76685	-4.92282	1.45439	-3.3848	0.000712309	0.00613456	0	0	0	3.25716	5.39128	8.75967	4.02412	10.8166	1.65279	VWDE
gene7815	714.406	-2.83027	0.636522	-4.44646	8.73e-06	0.000178593	190.751	128.98	102.561	700.29	1407.12	90.8816	1287.72	1354.48	1166.87	DGKB
gene7827	1304.69	1.48515	0.349419	4.25033	2.13e-05	0.000375835	2277.03	1781.59	2790.52	1086.26	1024.34	470.832	883.293	910.997	517.322	SOSTDC1
gene7833	80.5775	-1.71734	0.515601	-3.33077	0.000866076	0.00718978	44.9414	32.4769	18.1619	121.329	197.321	40.5135	90.5426	112.973	66.9379	AGR2
gene7853	56.5986	-2.02047	0.480619	-4.2039	2.62e-05	0.000443291	18.9753	25.9815	10.6835	33.3859	108.904	52.558	75.4522	79.3216	104.126	TMEM196
gene786	792.379	-1.47457	0.394275	-3.73995	0.000184057	0.00210288	407.469	322.913	356.828	717.39	837.805	1738.79	701.202	1421.78	627.233	RWDD3
gene7866	17.8315	-3.06083	0.947009	-3.2321	0.00122884	0.00943034	4.99349	0.927912	3.20504	17.1001	66.8519	14.2345	2.01206	15.624	35.5349	IL6
gene7867	1902.78	-1.1491	0.345008	-3.33065	0.000866434	0.00718978	801.955	1119.06	1229.67	1683.14	2426.08	1555.94	1830.97	2812.31	3665.88	FAM126A
gene7892	16.1044	-2.11878	0.64306	-3.29483	0.000984797	0.00796614	4.99349	5.56747	4.27339	17.1001	11.8608	30.6588	11.0663	42.0645	17.3543	GRM3
gene7895	774.692	-2.36274	0.586825	-4.02631	5.67e-05	0.000831541	206.731	206.924	204.054	1148.96	1296.06	122.635	961.764	1773.92	1051.17	SEMA3A
gene7909	122.356	-2.82756	0.543683	-5.20076	1.98e-07	7.37e-06	20.9727	11.1349	40.5972	64.329	253.39	244.176	193.158	94.9456	178.501	LOC101102230
gene7918	3153.14	-2.71193	0.558866	-4.85257	1.22e-06	3.4e-05	653.149	1081.95	276.702	3762.02	5043.01	1082.91	3749.47	7388.93	5340.15	MAGI2
gene7932	1384.85	-1.36534	0.298052	-4.58086	4.63e-06	0.000105048	536.301	619.845	869.635	1003.21	2044.37	1850.48	1740.43	1879.68	1919.71	CCDC146
gene7944	603.279	-1.39484	0.300525	-4.64136	3.46e-06	8.15e-05	271.646	342.4	253.198	501.603	1020.03	658.07	833.998	608.133	940.436	RELN
gene7977	47.9876	-5.42704	0.891441	-6.08793	1.14e-09	9.91e-08	3.99479	0.927912	0	106.672	53.9128	26.279	62.3738	143.019	34.7085	SLC26A4
gene7983	47.9043	-3.30615	0.502302	-6.582	4.64e-11	5.76e-09	10.9857	7.4233	2.13669	46.4146	87.3388	62.4127	47.2834	85.3309	81.813	LAMB4
gene8001	18.7741	-2.0739	0.560925	-3.69729	0.00021791	0.00242307	6.99089	5.56747	5.34174	13.0286	39.8955	17.5193	21.1266	26.4405	33.0557	ASZ1
gene8013	97.7182	-1.94805	0.502961	-3.87316	0.000107431	0.00137944	11.9844	40.8281	48.0756	61.0718	159.582	114.971	88.5305	174.267	180.154	TFEC
gene8031	462.328	-2.43628	0.459167	-5.30585	1.12e-07	4.63e-06	122.84	167.952	60.8958	606.646	369.842	802.605	591.545	346.131	1092.49	LSMEM1
gene8044	2035.51	-2.16199	0.596878	-3.62216	0.000292159	0.00307173	429.44	923.272	488.235	2460.79	3593.83	332.867	2942.63	3188.49	3960.08	ELMO1
gene8055	8.26112	-3.16949	0.907396	-3.49295	0.000477708	0.00452675	1.9974	1.85582	0	9.77149	11.8608	10.9496	12.0723	6.00922	19.8334	DPY19L2
gene8057	20.6735	-5.5364	1.43701	-3.85273	0.00011681	0.00146906	0	0.927912	1.06835	123.772	10.7826	14.2345	4.02412	4.80737	26.4446	NPSR1
gene8058	363.879	-1.87464	0.472692	-3.96589	7.31e-05	0.00101446	116.848	189.294	86.5361	591.175	627.545	178.478	341.044	767.978	376.009	BMPER
gene8071	1031.83	-2.1788	0.554471	-3.92952	8.51e-05	0.00114942	258.663	422.2	242.515	1940.45	1109.53	270.455	1430.57	2515.46	1096.62	PDE1C
gene8081	14.1225	-6.84597	1.5088	-4.53737	5.7e-06	0.000125185	0	0	0	2.44287	8.62605	51.4631	27.1628	32.4498	4.95836	LOC101123549
gene8099	1052.05	-1.75237	0.475958	-3.68177	0.000231619	0.0025439	353.539	598.503	271.36	1783.3	1739.23	379.951	1216.29	1722.24	1404.04	CHN2
gene8107	1423.76	-1.37467	0.363123	-3.78569	0.000153284	0.00182563	558.272	816.563	696.563	2004.78	1735.99	729.243	2118.7	2029.91	2123.83	JAZF1
gene8117	87.0803	-7.6163	1.06685	-7.13903	9.4e-13	1.97e-10	1.9974	0	0	93.6434	172.521	145.63	121.73	109.368	138.834	HOXA10
gene8118	250.957	-4.70047	0.323212	-14.543	6.47e-48	1.15e-43	14.9805	16.7024	10.6835	318.388	340.729	387.615	475.852	358.149	335.516	HOXA9
gene8143	124.788	-2.28329	0.669923	-3.40829	0.000653726	0.00576981	64.9154	12.9908	26.7087	118.072	154.191	466.452	77.4642	123.79	78.5074	LOC106990092
gene8148	911.678	-1.48348	0.313818	-4.72719	2.28e-06	5.76e-05	342.553	470.451	431.612	1147.34	1437.32	632.886	988.926	1326.83	1427.18	MPP6
gene8157	28.1648	-1.95358	0.554078	-3.52582	0.00042218	0.00409676	12.9831	7.4233	8.54678	22.8001	25.8782	77.7421	23.1387	33.6516	41.3197	ZNF804B
gene8160	286.587	-1.69796	0.419729	-4.04537	5.22e-05	0.000780216	135.823	111.349	97.2196	604.204	527.267	251.841	216.296	414.636	220.647	STEAP1
gene8162	1063.29	-1.31344	0.308576	-4.25644	2.08e-05	0.000369211	501.346	530.766	570.498	1315.08	1535.44	806.985	1323.93	1954.2	1031.34	CFAP69
gene8164	419.324	-1.05805	0.219072	-4.82969	1.37e-06	3.73e-05	236.691	273.734	220.08	496.717	503.546	647.121	427.562	449.489	518.975	HUS1
gene8169	453.627	1.8322	0.347322	5.27521	1.33e-07	5.28e-06	771.994	879.661	962.581	251.616	416.207	192.713	271.628	161.047	175.195	IGFBP3
gene8180	1095.99	1.33845	0.282431	4.73902	2.15e-06	5.5e-05	2065.31	1672.1	1770.25	659.575	627.545	1133.28	728.365	548.04	659.462	ZMIZ2
gene8199	129.205	-2.15908	0.417297	-5.17397	2.29e-07	8.34e-06	45.9401	38.9723	32.0504	144.944	245.842	72.2673	227.363	206.717	148.751	HECW1
gene8213	927.046	-2.54862	0.527716	-4.82953	1.37e-06	3.73e-05	261.659	262.599	132.475	1262.15	1927.92	283.594	932.589	1840.02	1440.4	SUGCT
gene8221	314.813	-2.16816	0.653303	-3.31877	0.000904135	0.00745733	111.854	151.25	20.2986	472.289	925.144	163.149	213.278	510.783	265.272	POU6F2
gene8267	307.899	-1.15236	0.3522	-3.27188	0.00106834	0.00849219	192.749	221.771	94.0146	447.86	539.128	289.069	310.863	353.342	322.293	LOC101107188
gene8281	158.75	-2.16799	0.372991	-5.81246	6.16e-09	3.96e-07	47.9375	65.8817	28.8454	222.301	267.408	118.256	231.387	260.8	185.939	GRM8
gene8287	299.392	1.30672	0.333905	3.91344	9.1e-05	0.00121123	479.375	405.498	604.685	184.844	211.338	331.773	182.091	161.047	133.876	GCC1
gene8294	23.2408	-3.6249	0.943943	-3.84017	0.000122947	0.00153214	1.9974	0.927912	5.34174	13.0286	43.1303	62.4127	15.0904	3.60553	63.6323	LEP
gene8305	218.603	-1.59952	0.341057	-4.68988	2.73e-06	6.68e-05	89.8828	124.34	64.1008	237.773	225.356	400.755	213.278	249.983	361.96	CCDC136
gene8313	311.372	1.69548	0.431083	3.93307	8.39e-05	0.0011343	866.87	447.254	417.724	111.558	214.573	328.488	128.772	159.845	127.265	TSPAN33
gene8314	378.047	1.59038	0.266956	5.95746	2.56e-09	1.92e-07	523.318	807.283	714.724	280.93	241.529	239.796	211.266	153.836	229.737	SMO
gene8330	453.207	1.65725	0.452097	3.66569	0.000246669	0.00267094	631.177	1056.89	807.671	189.73	150.956	297.829	540.238	254.791	149.577	MEST
gene8362	356.723	-1.67201	0.513249	-3.25769	0.00112322	0.00881646	171.776	142.898	120.723	420.988	476.589	91.9765	459.755	715.097	610.705	AGBL3
gene8375	188.38	-1.41782	0.398184	-3.56072	0.000369846	0.00371477	73.9037	82.5842	111.108	212.53	287.894	209.137	195.17	118.982	404.106	FAM180A
gene838	15.9477	-4.53735	1.06433	-4.26309	2.02e-05	0.000361051	0.998698	0	2.13669	7.32861	17.2521	33.9437	25.1507	9.61474	47.1044	LOC101118573
gene8380	71.4944	-3.25781	0.584549	-5.5732	2.5e-08	1.27e-06	9.98698	19.4862	2.13669	59.4432	147.721	112.781	58.3497	155.038	78.5074	CHRM2
gene8383	77.556	-1.75373	0.492679	-3.55957	0.000371461	0.00372888	16.9779	38.9723	34.1871	134.358	90.5736	31.7538	89.5366	141.817	119.827	DGKI
gene8390	114.382	-1.43261	0.402783	-3.55679	0.000375417	0.00375798	71.9063	40.8281	48.0756	92.8291	153.112	77.7421	170.019	218.735	156.188	SVOPL
gene8391	280.353	2.09456	0.36387	5.75633	8.6e-09	5.26e-07	484.369	502	731.818	135.172	101.356	83.2169	204.224	182.68	98.3408	ATP6V0A4
gene8414	788.145	1.25862	0.217795	5.77891	7.52e-09	4.73e-07	1271.34	1055.96	1536.28	547.203	563.928	636.171	548.286	490.352	443.773	MKRN1
gene8422	199.637	-1.7409	0.468781	-3.71368	0.000204265	0.00229578	95.875	99.2866	38.4605	362.359	292.208	89.7866	239.435	328.103	251.224	TMEM178B
gene8469	1883.44	1.6414	0.390086	4.20778	2.58e-05	0.000436982	4511.12	2573.1	3244.57	1231.21	748.31	1990.64	948.685	1021.57	681.775	EPHB6
gene8470	4799.75	1.54402	0.470481	3.2818	0.00103146	0.00827688	10840.9	7928.08	6854.52	3172.48	6071.66	1751.93	3170	2071.98	1336.28	TRPV6
gene8477	23.6086	-2.30593	0.694431	-3.32061	0.000898224	0.00741321	7.98959	9.27912	2.13669	41.5288	54.9911	15.3294	49.2954	9.61474	22.3126	LOC101122103
gene8482	20.0344	-7.35747	2.28146	-3.22489	0.0012602	0.00961697	0	0	0	3.25716	30.1912	0	84.5064	1.20184	61.1531	LOC101114266
gene8528	714.776	-1.80845	0.452947	-3.99262	6.53e-05	0.00093133	262.658	359.102	181.619	1223.88	996.309	306.588	833.998	1435	833.831	TPK1
gene8532	180.885	-1.73596	0.532766	-3.25839	0.00112045	0.00880395	40.9466	139.187	32.0504	153.901	214.573	303.304	150.904	179.075	414.023	CNTNAP2
gene8574	587.402	1.73486	0.278849	6.22149	4.92e-10	4.78e-08	1397.18	1086.58	818.354	271.973	442.085	323.013	364.182	255.993	327.252	LOC105615174
gene8607	455.117	1.80154	0.269034	6.69633	2.14e-11	3.01e-09	811.942	866.67	925.189	326.531	219.964	193.808	327.965	195.9	228.085	ABCB8
gene8645	1827.32	1.34866	0.304731	4.42574	9.61e-06	0.000193507	3410.55	2406.08	3396.28	1525.17	741.841	976.703	1361.16	1098.48	1529.65	INSIG1
gene8672	1203.64	-2.46913	0.539849	-4.57374	4.79e-06	0.000108105	218.715	373.949	304.479	1255.64	1390.95	3393.28	1774.64	374.975	1746.17	GFPT2
gene8678	2625.43	-1.01041	0.275544	-3.66697	0.000245438	0.00266086	1521.02	1756.54	1420.9	2787.32	3929.17	1963.26	3012.05	3320.69	3917.93	RNF130
gene8683	2613.92	1.40385	0.363445	3.86262	0.00011218	0.00142495	4112.64	3549.26	5737.03	1814.24	1572.1	826.694	2602.6	1466.25	1844.51	SQSTM1
gene871	2512.87	1.58481	0.299929	5.28394	1.26e-07	5.07e-06	4493.14	4036.42	5039.39	1651.38	1177.46	2333.36	1572.42	1118.92	1193.31	CELSR2
gene8728	106.507	1.48691	0.432935	3.43449	0.000593679	0.00536244	211.724	132.691	214.738	73.2861	54.9911	43.7984	108.651	88.9364	29.7502	LPAR2
gene8756	969.344	1.60665	0.399825	4.01838	5.86e-05	0.000855072	1112.55	2108.22	2045.89	765.433	486.294	278.12	827.962	430.26	669.379	UPF1
gene8782	2292.48	1.44333	0.289289	4.98922	6.06e-07	1.91e-05	3954.84	3530.7	4402.66	1305.31	1547.3	2205.25	1471.82	1221.07	993.325	PIK3R2
gene880	154.072	1.796	0.41598	4.31751	1.58e-05	0.000295043	268.65	250.536	361.101	139.244	62.5389	114.971	92.5547	54.0829	42.9725	AMIGO1
gene8801	21.6958	2.49644	0.55311	4.51345	6.38e-06	0.000137288	30.9596	41.756	71.5793	5.70003	12.9391	6.56975	15.0904	2.40369	8.26394	LOC105615198
gene8809	48.2278	1.81202	0.524531	3.45456	0.000551201	0.00506899	77.8985	107.638	90.8095	15.4715	37.739	51.4631	10.0603	13.2203	29.7502	BST-2B
gene8813	451.12	1.96706	0.372148	5.28569	1.25e-07	5.04e-06	792.966	1076.38	817.286	307.802	218.886	246.366	318.911	102.157	179.327	ANO8
gene8847	492.354	1.18169	0.31806	3.71528	0.000202975	0.00228273	642.163	821.202	892.07	359.102	375.233	188.333	478.87	293.25	380.967	RAB8A
gene8858	154.293	-1.2898	0.395509	-3.2611	0.00110982	0.00874749	88.8841	67.7376	79.0577	106.672	195.164	107.306	217.302	299.259	227.258	LOC101120492
gene8868	34.8729	2.137	0.49502	4.31699	1.58e-05	0.000295043	27.9635	100.214	87.6045	21.1716	22.6434	18.6143	14.0844	10.8166	10.7431	LOC105613870
gene8884	958.551	1.50503	0.252761	5.95436	2.61e-09	1.94e-07	1783.67	1423.42	1853.58	671.79	497.076	736.907	660.961	578.086	421.461	EPHX3
gene8893	1224.64	1.52103	0.444645	3.42078	0.00062441	0.00558041	2259.06	2747.55	1488.21	819.176	425.911	1421.26	662.973	823.262	374.356	CASP14
gene895	688.234	1.39342	0.351465	3.96461	7.35e-05	0.0010164	1164.48	1004.93	1347.19	414.474	364.451	806.985	436.617	300.461	354.523	STRIP1
gene896	38.8953	1.98236	0.428786	4.62319	3.78e-06	8.83e-05	75.9011	65.8817	90.8095	9.77149	26.9564	21.8992	21.1266	9.61474	28.0974	ALX3
gene8961	1356.77	1.14601	0.269113	4.25845	2.06e-05	0.000367023	2685.5	1799.22	1929.44	1055.32	897.109	1346.8	922.529	766.776	808.213	GIPC1
gene8962	19.6326	2.04069	0.619288	3.29522	0.000983435	0.00796345	31.9583	34.3327	52.349	0.814291	15.0956	13.1395	13.0784	6.00922	9.91672	PTGER1
gene8970	404.868	1.5375	0.361129	4.25748	2.07e-05	0.000367872	604.212	702.429	851.473	276.859	284.66	118.256	347.08	177.873	280.974	PRKACA
gene8972	15.6348	1.73377	0.539985	3.21077	0.00132378	0.00996086	41.9453	14.8466	30.9821	8.9572	10.7826	6.56975	14.0844	8.4129	4.13197	C5H19orf67
gene8982	481.461	1.21554	0.282166	4.30788	1.65e-05	0.000306172	744.03	811.923	772.415	414.474	257.703	389.805	434.605	264.405	243.786	CC2D1A
gene8997	1515.25	1.56212	0.33464	4.66805	3.04e-06	7.32e-05	3026.06	2227.92	2875.99	818.362	997.387	1473.81	965.788	685.051	566.906	IER2
gene8999	300.765	2.61244	0.225103	11.6055	3.86e-31	2.29e-27	564.264	760.888	714.724	106.672	129.391	94.1665	128.772	99.753	108.258	NACC1
gene901	577.634	-1.3925	0.4098	-3.398	0.0006788	0.00591254	232.697	449.109	149.569	806.962	693.319	360.241	808.847	850.905	847.053	SLC16A4
gene9059	420.521	1.66059	0.509932	3.25649	0.00112801	0.00883986	457.404	805.428	1055.53	292.33	367.685	54.7479	286.718	236.763	228.085	LOC101109701
gene91	125.714	2.52402	0.301201	8.37984	5.3e-17	2.94e-14	251.672	225.483	362.17	32.5716	43.1303	50.3681	59.3557	50.4774	56.1948	ARL4C
gene9102	1466.22	1.00308	0.249391	4.02213	5.77e-05	0.000844336	2021.37	2437.62	2146.31	1315.08	1099.82	1357.75	1138.82	777.592	901.595	DNMT1
gene9118	263.925	2.45622	0.290274	8.46172	2.63e-17	1.51e-14	540.296	466.74	733.955	122.958	100.278	90.8816	142.856	102.157	75.2018	S1PR5
gene9123	238.012	1.15653	0.239495	4.82903	1.37e-06	3.73e-05	373.513	395.29	361.101	218.23	153.112	146.724	202.212	138.212	153.709	SLC44A2
gene9129	18.9521	-1.60594	0.490701	-3.27274	0.00106509	0.00847772	8.98828	6.49538	8.54678	15.4715	24.7999	38.3236	19.1146	24.0369	24.7918	C5H19orf38
gene9175	2355.2	1.57269	0.406173	3.87197	0.000107959	0.00138521	4685.89	3878.67	4109.93	1337.07	1020.03	2952.01	1255.52	936.236	1021.42	CAMSAP3
gene9189	430.056	1.45086	0.328341	4.41877	9.93e-06	0.000198957	725.055	811.923	698.699	296.402	300.834	135.775	384.303	230.754	286.759	MAP2K7
[truncated: 81 more rows]
