# Supplementary material for: Transcriptome Analysis Reveals Candidate Genes Regulating the Skin and Hair Diversity of Xinji Fine-Wool Sheep and Tan Sheep
Source: MDPI journal article supplement (doi:10.3390/agriculture12010015), 2021-12-23
Supplement: s1 [file s1 › Supplementary Table S7.xls]

## Sheet: Sheet1
Table S7 | Differentially expressed mRNAs between 12-m-XFWS and 3-m-XFWS.
Row.names	baseMean	log2FoldChange	lfcSE	stat	pvalue	padj	X1	X2	X3	S1	S2	S3	S4	name
gene10000	4565.35	1.4403	0.34966	4.11914	3.80288e-05	0.000189922	5671.45	5740.85	10016.1	2783.77	4256.17	1269.17	2219.94	CD74
gene10005	1342.29	1.05837	0.205497	5.15031	2.60058e-07	2.60362e-06	1987.76	1689.64	2050.53	997.157	1074.24	796.565	800.16	MYOZ3
gene10011	84.9644	-1.082	0.339922	-3.18307	0.00145722	0.00438164	46.0181	73.2831	35.8485	105.399	109.755	89.6742	134.773	ZNF300
gene10013	1455.07	1.54087	0.255487	6.0311	1.6285e-09	3.4656e-08	2587.11	1943.55	2453.23	965.124	969.343	518.656	748.455	GPX3
gene10014	1525.22	1.08818	0.214387	5.07577	3.8594e-07	3.63413e-06	2456.92	1760.86	2343.29	1154.22	1132.52	853.925	974.771	TNIP1
gene10016	1082.02	1.11043	0.277776	3.99756	6.39992e-05	0.000298605	1317.69	1712.35	1651.42	936.191	933.406	500.075	522.986	ANXA6
gene10019	135.588	-1.19209	0.271439	-4.39173	1.12453e-05	6.63207e-05	93.1586	65.0258	76.4767	182.898	194.257	190.659	146.639	SLC36A3
gene10030	860.522	1.3913	0.33117	4.20118	2.65532e-05	0.000138771	1490.54	1018.74	1484.13	447.429	733.321	237.515	611.987	LOC105615377
gene10035	492.488	-1.58867	0.281674	-5.6401	1.6995e-08	2.53369e-07	242.437	299.325	145.784	582.794	693.498	891.087	592.491	GRIA1
gene1004	116.712	-1.72978	0.387024	-4.46943	7.84282e-06	4.85738e-05	41.5285	76.3796	32.2636	214.931	142.779	212.471	96.6295	CD101
gene10043	2084.7	1.24835	0.195567	6.38325	1.73373e-10	5.10271e-09	2652.21	3279.16	3415.16	1522.08	1249.07	1271.6	1203.63	LARP1
gene10048	1737.14	-1.19317	0.21126	-5.64791	1.62413e-08	2.43406e-07	1108.92	1066.22	828.099	1853.78	2370.91	2296.79	2635.27	MRPL22
gene10051	1076.26	-2.18027	0.312423	-6.97856	2.98223e-12	1.57883e-10	470.282	399.444	199.556	1031.26	1966.85	1575.36	1891.06	SGCD
gene10054	40.5714	-1.65926	0.446836	-3.71337	0.00020452	0.000809183	21.3255	16.5145	16.7293	30.9997	76.7316	58.9749	62.7244	LOC105611754
gene10066	2576.34	1.00326	0.211774	4.73741	2.16468e-06	1.59598e-05	3574.82	2834.3	4421.31	1907.51	1941.6	1741.78	1613.03	CYFIP2
gene10068	1163.44	1.01208	0.222301	4.55273	5.29545e-06	3.46413e-05	1581.45	1466.69	1854.56	984.757	640.077	721.433	895.094	NIPAL4
gene10076	3698.34	-1.69659	0.32084	-5.28797	1.23679e-07	1.3814e-06	1422.07	2497.82	944.009	3712.73	6696.05	6201.25	4414.44	EBF1
gene10096	1044.75	-1.49676	0.248091	-6.03312	1.60822e-09	3.42901e-08	516.301	592.458	426.597	1315.42	1022.76	1791.06	1648.63	ATP10B
gene10115	127.881	-2.8288	0.395099	-7.15972	8.08392e-13	5.35795e-11	39.2837	36.1255	9.55959	266.597	198.142	197.122	148.335	LOC106990422
gene10116	11732.2	-1.04793	0.242808	-4.31588	1.58967e-05	8.94485e-05	7677.16	9242.96	4939.92	15172.3	13483.4	17888	13721.4	LOC101120408
gene10134	65.3848	-1.85565	0.434399	-4.27177	1.9393e-05	0.000106152	21.3255	40.2541	16.7293	87.8324	54.392	141.378	95.7819	CKMT2
gene10139	6013.84	-1.81838	0.267872	-6.78822	1.13526e-11	4.90225e-10	2839.65	2915.84	1626.33	6001.54	9298.12	8860.78	10554.7	SSBP2
gene10141	936.459	-1.28672	0.233012	-5.52213	3.3491e-08	4.4847e-07	514.056	602.779	424.207	929.991	1375.34	1261.09	1447.75	ATG10
gene10146	1653.1	-1.16594	0.400505	-2.91117	0.00360079	0.00947723	1697.06	438.666	763.572	1076.72	2216.47	2443.02	2936.18	RPS23
gene10151	961.216	-1.44679	0.28641	-5.05144	4.38481e-07	4.04207e-06	460.181	617.229	374.019	814.258	1621.08	1195.66	1646.09	XRCC4
gene10172	1232.39	-1.2916	0.261611	-4.93709	7.92951e-07	6.75946e-06	611.704	934.101	476.784	1448.72	1396.71	1837.11	1921.57	TMEM161B
gene10185	1341.15	-1.29884	0.263872	-4.92225	8.55534e-07	7.22451e-06	734.045	786.503	672.756	1688.45	1184	1734.51	2587.81	POLR3G
gene10187	668.328	-1.01241	0.330326	-3.0649	0.00217744	0.00618613	544.36	341.644	382.384	584.861	601.226	1454.18	769.645	ADGRV1
gene10195	7820.96	-1.28931	0.312078	-4.13137	3.60605e-05	0.000181203	5693.9	3522.75	3638.62	6047.01	8690.09	11149.5	16004.9	FAM172A
gene10197	1331.35	-1.54524	0.269961	-5.72395	1.04078e-08	1.64182e-07	741.901	740.056	423.012	1329.89	1787.17	1947.79	2349.62	KIAA0825
gene10201	1315.82	-1.4088	0.264195	-5.33244	9.69028e-08	1.12189e-06	763.227	844.304	420.622	1475.59	1814.36	1749.86	2142.8	MCTP1
gene10214	594.011	-1.57582	0.293493	-5.3692	7.90847e-08	9.40437e-07	233.458	420.088	181.632	642.727	844.047	909.668	926.456	SPATA9
gene10219	28.3115	-1.86139	0.534106	-3.48505	0.000492049	0.00172489	13.4687	6.19294	14.3394	60.9661	40.794	23.4284	38.9908	LOC105607634
gene10234	933.35	-1.67907	0.292326	-5.74382	9.25625e-09	1.49182e-07	410.796	559.429	268.863	1813.48	962.544	1325.72	1192.61	RGMB
gene10244	966.729	-1.04846	0.244024	-4.29654	1.73488e-05	9.61635e-05	464.67	563.557	773.132	1022.99	1292.78	1131.03	1518.95	ST8SIA4
gene10266	11544.2	-2.27029	0.30927	-7.34079	2.12338e-13	1.69672e-11	3939.6	5057.57	1874.87	18913.9	15925.2	22004.9	13093.3	EFNA5
gene10268	4091.52	-1.26867	0.183505	-6.91352	4.72758e-12	2.34324e-10	2084.28	2612.39	2101.91	5118.05	5224.55	5776.31	5723.18	FER
gene10273	171.932	-1.5491	0.321627	-4.81646	1.4613e-06	1.14154e-05	83.057	66.058	96.7908	269.697	141.808	322.342	223.774	TMEM232
gene10291	212.066	-1.10565	0.319662	-3.45883	0.000542528	0.0018776	68.4659	129.02	186.412	247.998	329.266	252.057	271.241	2021-03-01
gene10310	991.81	-1.37117	0.308006	-4.45176	8.51694e-06	5.21072e-05	475.894	794.76	289.178	1060.19	1338.43	1607.67	1376.55	PRDM5
gene10317	1378.06	-1.13122	0.194611	-5.81273	6.14604e-09	1.05841e-07	662.212	903.137	895.016	1796.95	1831.85	1796.72	1760.52	USP53
gene10319	168.42	-1.73846	0.365182	-4.76053	1.93082e-06	1.44495e-05	101.015	80.5082	34.6535	177.732	185.516	322.342	277.174	MYOZ2
gene10326	506.35	-1.14278	0.279103	-4.09448	4.23113e-05	0.000208328	281.721	410.798	205.531	751.226	490.499	634.182	770.493	PRSS12
gene10329	332.39	-1.60282	0.282422	-5.67528	1.38459e-08	2.11209e-07	125.708	197.142	137.419	393.696	662.417	395.859	414.49	NDST3
gene10341	21.8798	-2.74965	0.678659	-4.0516	5.0869e-05	0.000244068	2.24478	8.25725	4.77979	13.4332	37.8802	32.315	54.2481	NDST4
gene10342	55.4269	-1.54464	0.352448	-4.38261	1.17266e-05	6.86259e-05	22.4478	24.7717	32.2636	72.3326	87.4157	77.5561	71.2007	UGT8
gene10347	623.738	-1.24203	0.272362	-4.56022	5.11e-06	3.36469e-05	251.416	368.48	431.376	667.527	1033.45	636.606	977.314	ARSJ
gene10351	2436.49	-1.33685	0.313627	-4.26253	2.02124e-05	0.000109934	1114.54	1807.31	982.248	2301.21	5251.74	2983.49	2614.93	ANK2
gene10368	99.3211	-1.1691	0.320473	-3.64806	0.000264223	0.00101124	48.2629	77.4117	47.7979	127.099	141.808	97.753	155.116	ENPEP
gene10375	91.0288	-1.63172	0.375364	-4.34702	1.37998e-05	7.91601e-05	42.6509	61.9294	19.1192	122.965	102.956	150.265	137.316	RRH
gene10385	335.051	-1.73647	0.313456	-5.53975	3.02902e-08	4.11917e-07	218.867	109.409	102.766	452.595	340.921	580.863	539.938	COL25A1
gene10390	451.148	-1.3905	0.2861	-4.8602	1.17269e-06	9.44117e-06	274.986	293.132	133.834	626.194	505.069	723.857	600.968	RPL34
gene10400	1795.9	-1.02437	0.193478	-5.29452	1.1933e-07	1.3407e-06	979.849	1111.63	1295.32	2215.44	2560.31	2320.22	2088.55	DKK2
gene10401	131.803	-1.19011	0.368	-3.23399	0.00122075	0.00376122	115.606	74.3152	38.2384	119.865	173.86	176.117	224.621	GIMD1
gene10402	1191.8	-1.0354	0.27607	-3.75049	0.000176488	0.00071617	912.505	652.323	670.366	966.157	1563.77	1437.21	2140.26	AIMP1
gene10403	1147.04	-1.03044	0.215151	-4.78938	1.67297e-06	1.28002e-05	608.337	838.111	709.799	1222.42	1511.32	1401.66	1737.64	TBCK
gene10407	418674	3.08847	0.206092	14.9859	9.08341e-51	5.17754e-47	674836	857190	1.00155e+06	110419	101614	100130	84983.9	GSTCD
gene10409	98.5655	-1.46395	0.378622	-3.86652	0.000110399	0.000478294	33.6718	68.1223	45.408	91.9657	204.941	102.6	143.249	ARHGEF38
gene10413	45983.3	-1.06632	0.355822	-2.99678	0.00272846	0.00747224	43079.7	17705.6	24097.3	33185.2	57640	49395.9	96779.5	LOC105612165
gene10418	1860.06	-1.05567	0.288311	-3.66158	0.000250666	0.000967147	1289.63	1098.21	1064.7	1429.09	2219.39	2248.32	3671.07	CENPE
gene10419	952.437	-1.13311	0.195669	-5.79095	6.99879e-09	1.17103e-07	648.743	563.557	486.344	1277.19	1212.16	1331.38	1147.69	BDH2
gene10422	255.9	-1.59841	0.300642	-5.31664	1.05699e-07	1.20698e-06	158.257	130.052	66.9171	311.03	400.17	410.401	314.47	SLC9B1
gene10432	214.689	-1.12948	0.274548	-4.11395	3.8894e-05	0.000193621	95.4034	141.405	146.979	222.164	296.242	248.018	352.613	BANK1
gene10446	651.428	-1.01531	0.234019	-4.33858	1.43404e-05	8.17675e-05	410.796	305.518	518.608	746.059	778.971	919.363	880.685	DAPP1
gene10451	259.666	-1.94338	0.339073	-5.73146	9.95692e-09	1.58532e-07	94.281	144.502	57.3575	331.697	261.276	525.927	402.623	C6H4orf17
gene10464	1636.2	-1.15696	0.233509	-4.95465	7.24599e-07	6.23272e-06	920.362	1261.29	700.24	2337.38	1913.43	2197.42	2123.31	TSPAN5
gene10466	2330.68	-1.11636	0.196852	-5.67105	1.41928e-08	2.1573e-07	1326.67	1585.39	1280.98	2593.64	3200.39	2873.61	3454.08	RAP1GDS1
gene10471	197.435	-2.13355	0.370787	-5.75411	8.70985e-09	1.40732e-07	70.7107	88.7654	41.8232	197.365	495.356	262.56	225.469	UNC5C
gene10476	807.552	-1.55961	0.244661	-6.37457	1.83476e-10	5.35399e-09	358.043	426.281	362.069	791.525	1468.58	1099.52	1146.84	BMPR1B
gene10486	173.148	-1.45724	0.321697	-4.52985	5.90257e-06	3.79166e-05	95.4034	70.1866	94.4009	324.463	255.448	137.339	234.793	GRID2
gene10489	1522.48	-2.24285	0.303874	-7.38088	1.57252e-13	1.29904e-11	593.746	586.265	277.228	1455.95	2551.57	2463.21	2729.36	CCSER1
gene1049	290.347	1.42659	0.253279	5.63249	1.7763e-08	2.62984e-07	459.059	468.599	430.181	174.632	227.281	142.994	129.687	GJA5
gene10495	151.937	-1.08362	0.318353	-3.40382	0.000664511	0.00223596	96.5257	100.119	81.2565	122.965	275.845	165.615	221.231	SNCA
gene10503	1132.35	-1.35397	0.233399	-5.8011	6.58815e-09	1.11542e-07	585.889	750.378	461.25	1250.32	1791.05	1574.55	1513.01	HERC5
gene10513	5248.68	1.13431	0.257493	4.40521	1.05682e-05	6.30236e-05	8175.51	5542.68	9138.97	3425.47	3935.65	2360.61	4161.85	LAP3
gene10520	1335.52	-1.96471	0.298033	-6.59225	4.332e-11	1.50563e-09	517.423	662.644	326.221	1201.75	2096.03	2041.5	2503.04	LCORL
gene10529	424.618	-1.13828	0.253541	-4.48953	7.13799e-06	4.47268e-05	251.416	306.55	197.167	469.129	465.246	578.439	704.378	PACRGL
gene10530	1116.79	-2.67811	0.422269	-6.34219	2.26526e-10	6.45601e-09	307.536	366.415	145.784	879.358	1286.95	3565.16	1266.35	KCNIP4
gene10542	642.804	-1.82582	0.31373	-5.81973	5.89415e-09	1.02325e-07	257.028	363.319	164.903	570.394	1032.48	1204.54	906.961	PPARGC1A
gene10547	129.813	1.37337	0.314394	4.3683	1.2522e-05	7.27577e-05	158.257	187.852	253.329	87.8324	101.985	53.3198	66.1149	SOD3
gene10565	679.451	-1.18417	0.214461	-5.52161	3.35916e-08	4.49465e-07	374.879	447.956	357.29	712.993	920.779	940.367	1001.9	TBC1D19
gene1057	2104.33	1.32332	0.215677	6.13566	8.48066e-10	1.98385e-08	3667.98	2715.6	3226.36	1509.68	1009.17	1236.86	1364.68	ANKRD35
gene10574	7812.57	-1.26441	0.237169	-5.33126	9.75332e-08	1.12767e-06	4271.83	4773.72	3966.03	7611.46	9268.98	10707.6	14088.4	PCDH7
gene10582	4246.63	-1.36537	0.242707	-5.6256	1.84865e-08	2.71579e-07	1725.12	2779.6	2197.51	4555.92	4971.04	6433.92	7063.28	ARAP2
gene10583	170.261	-1.49753	0.330365	-4.53296	5.81635e-06	3.74895e-05	53.8748	112.505	83.6464	164.298	217.568	231.052	328.879	LOC106991214
gene1060	76.1562	-1.32789	0.427092	-3.10915	0.00187628	0.00544831	48.2629	43.3506	31.0687	44.4329	125.296	155.92	84.7627	LOC101114745
gene10608	73.884	-1.07079	0.312686	-3.42448	0.000615966	0.0020927	48.2629	40.2541	47.7979	79.5659	93.2434	95.3293	112.734	KLB
gene10621	1751.38	-1.28195	0.189144	-6.77767	1.22131e-11	5.19514e-10	1004.54	923.78	961.934	1967.45	2397.13	2644.18	2360.64	RBM47
gene10622	247.753	-1.62041	0.271076	-5.9777	2.26315e-09	4.53691e-08	134.687	115.601	89.6211	333.763	369.089	433.829	257.679	NSUN7
gene10623	6323.31	-1.24249	0.224353	-5.53811	3.05745e-08	4.1494e-07	3050.66	4766.5	2835.61	8451.55	8367.63	8876.94	7914.29	APBB2
gene10633	2663.72	-1.46752	0.243804	-6.01927	1.75207e-09	3.65816e-08	1502.88	1199.37	1276.21	2816.84	2924.54	4895.73	4030.47	ATP8A1
gene10640	1783.43	-1.02117	0.21086	-4.84287	1.2798e-06	1.01694e-05	1038.21	1287.1	1043.19	1847.58	2128.09	2449.48	2690.37	GNPDA2
gene10658	248.179	-1.23785	0.279191	-4.43369	9.26334e-06	5.60917e-05	127.953	155.856	135.029	306.897	470.102	297.298	244.117	CORIN
gene10665	44.2955	-1.29777	0.425153	-3.05247	0.00226969	0.00639928	17.9583	35.0933	19.1192	64.066	67.0187	68.6694	38.1432	TXK
gene10670	45.6738	-1.72975	0.483341	-3.57872	0.000345276	0.00127631	22.4478	18.5788	17.9242	39.2663	110.727	74.3246	36.448	ZAR1
gene10671	4390	-1.07596	0.212734	-5.05776	4.2422e-07	3.93179e-06	2159.48	3303.93	2600.21	4911.38	5499.42	5862.75	6392.8	FRYL
gene10676	2941.53	-1.03983	0.191923	-5.41797	6.0278e-08	7.51827e-07	1778.99	1984.84	1739.85	3301.47	3391.73	4104.01	4289.84	DCUN1D4
gene10712	11.1508	-2.57838	0.813583	-3.16916	0.0015288	0.00456876	3.36718	5.16078	0	15.4998	18.4544	17.7733	17.8002	PPAT
gene10736	12044.8	-2.44253	0.20342	-12.0073	3.25356e-33	1.3909e-29	3684.81	3645.58	2891.78	15165	17591.9	20427.9	20906.7	ADGRL3
gene10742	61.4326	-2.04662	0.377477	-5.42185	5.89864e-08	7.38409e-07	24.6926	26.8361	14.3394	67.166	94.2147	99.3687	103.411	EPHA5
gene10748	147.562	-1.4012	0.294209	-4.76259	1.91125e-06	1.43516e-05	72.9555	100.119	54.9676	159.132	214.654	196.314	234.793	STAP1
gene10751	60.9926	-1.24617	0.363349	-3.42968	0.000604292	0.00205927	26.9374	34.0612	41.8232	70.266	66.0474	110.679	77.1341	GNRHR
gene10755	1569.61	-1.0852	0.255318	-4.2504	2.13387e-05	0.00011518	781.185	894.879	1193.75	2601.91	1398.65	2033.42	2083.47	TMPRSS11F
gene10799	571.653	1.28732	0.220712	5.83259	5.45719e-09	9.57107e-08	934.953	927.908	724.139	436.062	344.806	316.687	317.013	AMBN
gene10800	38.0241	-2.06581	0.483082	-4.27631	1.90016e-05	0.000104277	12.3463	20.6431	7.16969	54.7661	39.8227	50.8962	80.5246	ENAM
gene10807	849.349	-1.10216	0.246103	-4.47846	7.51831e-06	4.68183e-05	349.064	605.876	584.33	975.457	1265.59	1182.73	982.4	SLC4A4
gene10812	148.639	-1.35998	0.295415	-4.60362	4.15214e-06	2.81529e-05	79.6899	90.8297	64.5272	146.732	263.218	214.087	181.392	ADAMTS3
gene10835	438.114	-1.0815	0.289372	-3.7374	0.000185932	0.000747576	253.661	371.576	176.852	453.629	511.868	744.861	554.348	MTHFD2L
gene10855	63.1526	-1.08729	0.358468	-3.03314	0.0024202	0.00674578	31.427	36.1255	47.7979	94.0324	95.186	82.4033	55.0958	ART3
gene10870	89.178	1.78148	0.318615	5.59132	2.25356e-08	3.20066e-07	145.911	123.859	180.437	35.133	40.794	38.778	59.3339	SOWAHB
gene10879	1634.26	-1.044	0.291938	-3.57611	0.000348741	0.00128745	1313.2	850.497	887.847	1262.72	2118.37	1993.84	3013.31	MRPL1
gene10880	988.439	-1.25294	0.381273	-3.28619	0.00101551	0.00320627	571.298	791.664	292.762	788.425	2209.68	1421.86	843.389	FRAS1
gene10893	340.923	-2.46104	0.375479	-6.55442	5.58601e-11	1.87664e-09	139.177	108.376	38.2384	353.396	435.136	706.083	606.053	C6H4orf22
gene10904	207.459	-1.65173	0.278824	-5.92392	3.14348e-09	5.94619e-08	109.994	107.344	62.1373	262.464	296.242	354.657	259.374	LOC105609538
gene10917	43.9778	-1.39247	0.44575	-3.12388	0.00178484	0.005219	13.4687	31.9968	22.704	51.6661	91.3009	50.0883	46.6195	PLAC8
gene10924	1192.76	-1.0272	0.241848	-4.24728	2.16379e-05	0.000116428	897.914	732.831	615.399	1108.76	1515.21	1572.93	1906.31	MRPS18C
gene10932	4957.63	-1.11231	0.351935	-3.16054	0.00157475	0.00469133	4646.7	1896.07	2395.87	3289.07	6939.84	6311.13	9224.73	LOC101110941
gene10933	8747.25	-2.17258	0.293658	-7.39833	1.37906e-13	1.15034e-11	3188.72	4003.73	1540.29	11155.8	12131.4	15987.1	13223.8	ARHGAP24
gene10935	124.019	-1.4462	0.435408	-3.32147	0.000895436	0.00288361	85.3018	66.058	35.8485	123.999	250.592	234.284	72.0483	MAPK10
gene10960	395.176	1.60778	0.261582	6.14638	7.92729e-10	1.88012e-08	620.683	479.953	823.32	254.197	231.166	188.235	168.678	WFS1
gene10969	43.3832	-2.12989	0.431694	-4.9338	8.06461e-07	6.84489e-06	14.5911	15.4823	14.3394	44.4329	84.5019	55.7434	74.5912	STK32B
gene10972	2011.68	1.2156	0.193139	6.2939	3.09584e-10	8.38967e-09	3412.07	2454.47	3079.38	1342.29	1214.11	1255.44	1323.99	MSX1
gene10986	2880.79	1.46361	0.257966	5.67368	1.39765e-08	2.13011e-07	4529.98	3920.13	5143.06	1727.72	2061.07	999.342	1784.26	WDR1
gene10988	44.0332	-2.02849	0.397384	-5.10459	3.31505e-07	3.17933e-06	14.5911	16.5145	16.7293	76.4659	57.3059	62.2064	64.4197	CLNK
gene10992	178.807	-1.145	0.290406	-3.94275	8.05518e-05	0.000364206	88.669	131.084	96.7908	239.731	299.156	233.476	162.744	HS3ST1
gene11	1611.37	1.1012	0.235523	4.67557	2.93132e-06	2.07904e-05	3077.6	1935.29	1942.99	1108.76	1265.59	933.096	1016.3	STK25
gene11001	1340.61	-1.99711	0.245344	-8.14001	3.95233e-16	7.42691e-14	484.874	623.422	375.214	1676.05	2545.74	1872.66	1806.29	C1QTNF7
gene11002	1457.12	-1.09617	0.234539	-4.67373	2.95772e-06	2.09689e-05	831.693	1157.05	659.612	1845.51	1716.26	2188.54	1801.21	CC2D2A
gene11014	1511.82	-1.66617	0.310602	-5.36431	8.12581e-08	9.61601e-07	636.397	1018.74	366.849	2106.95	2661.32	2148.95	1643.55	LDB2
gene11023	560.822	-1.30734	0.27253	-4.79706	1.61015e-06	1.24025e-05	363.655	354.03	194.777	920.691	576.944	773.137	742.521	LOC101117587
gene11025	2127.71	1.10594	0.293231	3.77156	0.000162233	0.000667352	2530.99	2916.87	3748.55	1747.35	1393.8	759.403	1796.97	LOC101108390
gene11026	141.936	1.25595	0.278339	4.51231	6.41257e-06	4.07185e-05	182.95	201.27	253.329	84.7325	99.0712	66.2458	105.953	BLOC1S4
gene11031	4268.82	1.10124	0.315031	3.49568	0.000472864	0.00166893	9403.4	3146.01	5879.15	2827.17	3536.45	2316.99	2772.59	SORCS2
gene11058	327.858	1.38828	0.279208	4.97221	6.61935e-07	5.78095e-06	456.814	520.207	542.507	262.464	231.166	146.226	135.62	MFSD10
gene11073	2662.18	1.29308	0.233101	5.54729	2.90129e-08	3.97215e-07	4700.58	3414.37	3952.89	2198.91	1578.34	1433.98	1356.2	LETM1
gene11074	2603.64	1.01715	0.20443	4.97556	6.50583e-07	5.69635e-06	3740.93	3815.88	3429.5	2306.38	1665.76	1597.17	1669.83	FGFR3
gene11076	149.212	1.3814	0.294877	4.68466	2.80423e-06	2.00722e-05	321.004	193.013	176.852	78.5325	101.014	79.9797	94.0866	LOC101104153
gene11078	188.221	2.18806	0.282775	7.73779	1.01161e-14	1.17677e-12	319.882	336.483	362.069	110.566	65.0762	57.3592	66.1149	LOC106990166
gene11079	839.266	1.40955	0.243751	5.78276	7.34866e-09	1.21648e-07	1649.92	1067.25	1193.75	565.228	566.26	377.278	455.176	TMEM129
gene11081	626.738	1.00116	0.211619	4.73095	2.23466e-06	1.63908e-05	911.383	853.593	867.533	509.428	444.849	340.116	460.262	CTBP1
gene11082	369.745	1.92097	0.381432	5.03622	4.74824e-07	4.34895e-06	673.435	494.403	745.648	176.698	307.898	80.7876	109.344	SPON2
gene11086	50.1831	1.11024	0.370857	2.99372	0.00275602	0.00753476	81.9346	61.9294	72.8919	46.4995	35.9376	26.6599	25.4288	FGFRL1
gene11087	339.449	1.71861	0.288076	5.9658	2.4344e-09	4.80141e-08	644.253	457.245	589.11	169.465	224.367	100.984	190.716	IDUA
gene11089	577.856	1.12239	0.282053	3.97937	6.90981e-05	0.000318656	1176.27	693.609	638.103	470.162	444.849	330.421	291.584	DGKQ
gene11090	250.051	1.16673	0.362762	3.21623	0.00129885	0.0039626	328.861	552.204	216.286	250.064	153.463	149.457	100.02	TMEM175
gene11091	2005.56	1.39645	0.239084	5.84084	5.19398e-09	9.21339e-08	3335.75	3240.97	2741.21	1651.25	1102.41	1033.27	934.085	GAK
gene11094	212.045	1.15434	0.267134	4.32121	1.55179e-05	8.7653e-05	280.598	306.55	340.56	184.965	135.98	137.339	98.3247	UVSSA
gene11099	166.034	1.08147	0.272489	3.96886	7.22175e-05	0.000330989	274.986	203.335	234.21	146.732	110.727	106.64	85.6103	MFSD7
gene11107	6160.45	-1.73512	0.25848	-6.71277	1.90958e-11	7.6116e-10	2357.02	3817.95	1752.99	8382.32	8757.11	9430.33	8625.45	MCC
gene11117	2082.6	-1.08107	0.261787	-4.12959	3.63418e-05	0.000182543	1332.28	1677.25	805.395	2441.74	2418.5	3270.28	2632.73	EPB41L4A
gene11122	317.872	-1.72309	0.365396	-4.71568	2.40901e-06	1.75662e-05	87.5466	218.817	105.155	249.031	500.212	436.253	628.092	KCNN2
gene11143	126.841	-2.39227	0.421012	-5.68219	1.32981e-08	2.03578e-07	23.5702	62.9615	23.899	218.031	258.362	203.585	97.4771	ARL14EPL
gene11145	227.825	-1.14552	0.301159	-3.80371	0.000142546	0.000595681	129.075	194.045	80.0616	294.497	261.276	342.539	293.279	SIMC1
gene11146	191.422	-1.4745	0.269709	-5.46699	4.57733e-08	5.87631e-07	88.669	113.537	82.4515	196.331	261.276	307.801	289.888	LOC106990212
gene11159	583.95	-1.68988	0.252857	-6.68313	2.33896e-11	8.9167e-10	292.944	305.518	172.073	716.093	756.632	896.742	947.647	ANKRD31
gene11162	582.174	-1.08543	0.254201	-4.26998	1.95493e-05	0.000106741	236.825	436.602	390.748	644.794	728.464	754.556	883.227	POLK
gene11179	1019.81	-1.53862	0.294766	-5.21981	1.79102e-07	1.90227e-06	372.634	747.281	344.145	1586.15	1061.62	1636.76	1390.11	PDE8B
gene11202	2592.32	-1.08655	0.208549	-5.21006	1.88777e-07	1.98042e-06	1587.06	1710.28	1438.72	2567.81	3340.25	3622.51	3879.59	PAPD4
gene11205	468.724	1.54189	0.300217	5.13592	2.80763e-07	2.77954e-06	1028.11	663.676	558.041	271.764	361.318	176.925	221.231	THBS4
gene11212	389.876	-2.37628	0.305804	-7.77059	7.81197e-15	9.47409e-13	139.177	149.663	54.9676	550.761	570.145	642.261	622.158	GPR137C
gene11213	410.84	-1.17918	0.305424	-3.86079	0.000113019	0.000488901	143.666	354.03	217.481	492.895	431.251	571.168	665.387	TXNDC16
gene11215	25.1216	-4.03988	0.822111	-4.91403	8.92245e-07	7.48646e-06	0	5.16078	2.3899	44.4329	19.4257	82.4033	22.0383	ANKDD1A
gene11217	927.422	-1.13416	0.231577	-4.89755	9.70402e-07	8.03967e-06	576.91	623.422	452.886	1139.76	922.722	1441.25	1335.01	MTFMT
gene11219	658.638	1.42703	0.271068	5.26446	1.40605e-07	1.54542e-06	1133.62	1233.43	714.579	348.23	515.753	372.431	292.431	RASL12
gene11225	540.106	1.5009	0.309238	4.85352	1.21287e-06	9.70069e-06	526.402	686.384	1357.46	263.497	355.491	295.683	295.822	CILP
gene11232	176.966	-1.38306	0.29519	-4.68531	2.79539e-06	2.0034e-05	98.7705	117.666	59.7474	266.597	183.573	266.599	245.812	SLC24A1
gene11254	1887.97	-1.10703	0.219999	-5.03197	4.85469e-07	4.4322e-06	1203.2	1340.77	868.728	2165.84	2499.12	2863.92	2274.18	MAP2K5
gene11287	4145.87	-2.08531	0.29803	-6.99698	2.61535e-12	1.41527e-10	1638.69	1956.97	762.377	5291.65	5131.3	7270.07	6970.04	THSD4
gene11293	471.38	-1.14784	0.230505	-4.97968	6.36902e-07	5.59699e-06	332.228	222.946	279.618	525.961	682.814	570.36	685.73	SENP8
gene11295	5679.29	1.26165	0.231565	5.44838	5.08311e-08	6.45775e-07	9016.18	7651.37	8879.66	3978.29	4490.25	2549.66	3189.62	LOC101110145
gene11296	72.9751	1.05264	0.343036	3.06861	0.0021506	0.00612616	125.708	74.3152	111.13	37.1996	65.0762	53.3198	44.0766	CELF6
gene11317	973.428	1.42772	0.208608	6.84403	7.69937e-12	3.53923e-10	1717.26	1301.55	1536.7	602.427	614.824	458.066	583.167	KHNYN
gene11319	334.23	1.46758	0.301892	4.86127	1.16636e-06	9.39903e-06	362.533	597.618	617.788	237.664	225.338	183.388	115.277	NYNRIN
gene11320	377.51	1.07825	0.254844	4.23101	2.32642e-05	0.00012397	674.558	480.985	463.64	273.831	322.467	226.205	200.888	NFATC4
gene11328	1335.01	1.35366	0.246599	5.48933	4.03466e-08	5.27467e-07	2431.1	1550.3	2159.27	798.759	1039.28	620.449	745.912	DHRS1
gene11329	354.668	1.50782	0.250437	6.02075	1.73612e-09	3.63819e-08	666.701	453.117	569.99	195.298	256.419	163.999	177.154	RABGGTA
gene1133	1255.78	1.28039	0.270286	4.73718	2.16717e-06	1.59598e-05	2025.92	1374.83	2273.99	896.924	944.09	502.499	772.188	LOC101122398
gene11330	1658.01	1.3089	0.235671	5.55394	2.79296e-08	3.84848e-07	3004.64	1917.75	2622.91	1177.99	856.674	856.348	1169.73	TGM1
gene11331	121.306	1.0267	0.322564	3.18295	0.00145785	0.00438278	115.606	217.785	179.242	115.732	82.5593	67.8616	70.3531	TINF2
gene11337	690.767	1.46497	0.231022	6.34128	2.2786e-10	6.48319e-09	1003.42	1218.98	1037.22	526.995	359.376	356.273	333.117	IPO4
gene1134	63.1152	1.13046	0.385335	2.9337	0.00334944	0.00892002	120.096	91.8619	62.1373	64.066	33.995	31.5072	38.1432	LOC101122645
gene11345	1033.26	1.2854	0.212263	6.05567	1.39833e-09	3.03445e-08	1571.35	1339.74	1763.74	726.426	681.843	510.577	639.111	DCAF11
gene11346	549.505	1.13135	0.31422	3.60049	0.000317616	0.00118612	1213.31	456.213	721.749	331.697	400.17	285.18	438.223	PCK2
gene11356	192.205	1.316	0.266578	4.93663	7.9486e-07	6.76898e-06	243.559	285.907	346.535	122.965	124.325	84.827	137.316	THTPA
gene1138	1066.4	1.20432	0.222312	5.41722	6.05329e-08	7.53357e-07	1693.69	1353.16	1681.29	696.46	870.272	581.671	588.253	SF3B4
gene11387	3585.69	1.67499	0.247004	6.78124	1.19149e-11	5.09362e-10	6743.33	4432.08	6530.39	1977.78	2301.95	1324.11	1790.19	LRP10
gene11388	1594.98	2.09124	0.279507	7.48187	7.32734e-14	6.66477e-12	2784.66	2255.26	3462.96	880.391	822.679	477.455	481.452	MMP14
gene114	88.1822	1.35711	0.345039	3.93319	8.38245e-05	0.000376517	88.669	131.084	186.412	56.8328	45.6504	66.2458	42.3814	NEU2
gene11435	86.095	1.54134	0.338616	4.55189	5.31659e-06	3.47662e-05	144.789	134.18	133.834	47.5329	70.9039	29.8914	41.5337	SALL2
gene11446	859.45	1.01144	0.20646	4.89899	9.63308e-07	7.99251e-06	1405.24	1152.92	1062.31	675.793	635.221	522.696	561.977	ZNF219
gene11448	35.9729	-1.93549	0.555197	-3.48612	0.000490073	0.00171938	8.97914	23.7396	8.36464	47.5329	23.3109	85.6348	54.2481	LOC105615652
gene11452	1643.2	1.56778	0.211774	7.40306	1.33081e-13	1.11553e-11	2803.74	2188.17	2941.96	882.458	949.918	719.817	1016.3	NDRG2
gene1150	1702.25	-1.03865	0.217539	-4.77455	1.8011e-06	1.36459e-05	1056.17	1274.71	855.583	1821.75	2219.39	2533.5	2154.67	RPRD2
gene1154	937.448	1.73643	0.275626	6.29995	2.97733e-10	8.15902e-09	1912.56	1068.28	1705.19	643.76	474.959	386.972	370.413	ECM1
gene1157	721.779	1.31609	0.288907	4.55539	5.22885e-06	3.42614e-05	1009.03	1072.41	1208.09	582.794	561.403	362.736	255.983	ADAMTSL4
gene11591	1282.35	-1.41281	0.236785	-5.96664	2.42188e-09	4.78776e-08	555.584	882.494	534.142	1603.72	1575.43	1830.65	1994.47	KATNBL1
gene11593	66.914	-1.29648	0.41092	-3.15507	0.00160458	0.00477105	33.6718	59.8651	15.5343	88.8658	87.4157	104.216	78.8293	CHRM5
gene11597	915.03	-1.35238	0.232689	-5.81194	6.17525e-09	1.06127e-07	461.303	540.85	451.691	1614.05	991.683	1286.95	1058.69	RYR3
gene11601	5666.14	-1.36131	0.215331	-6.32193	2.58324e-10	7.2061e-09	2809.35	3012.86	3140.32	7573.22	5817.03	9716.32	7593.89	FMN1
gene11623	1016.57	-1.43411	0.267127	-5.36866	7.93257e-08	9.42648e-07	515.178	672.966	357.29	1031.26	1580.28	1293.41	1665.59	C7H15orf41
gene11625	997.959	-1.70123	0.269826	-6.30491	2.88352e-10	7.94013e-09	464.67	535.689	308.297	1143.89	1923.15	1460.64	1149.38	MEIS2
gene11639	236.353	-1.37652	0.337226	-4.0819	4.46689e-05	0.000218593	90.9138	102.183	178.047	231.464	491.471	307.801	252.593	GPR176
gene11651	84.5978	1.28295	0.336951	3.80752	0.000140368	0.000587873	94.281	145.534	142.199	73.3659	53.4207	45.241	38.1432	C7H15orf52
gene11657	1250.84	1.31503	0.198112	6.63779	3.18412e-11	1.15848e-09	1869.91	1715.44	2115.06	911.391	718.752	714.162	711.159	BAHD1
gene11658	227.667	1.36863	0.268963	5.08855	3.60819e-07	3.42018e-06	321.004	344.74	384.773	130.199	184.544	95.3293	133.077	CHST14
gene11670	1819.31	1.22126	0.220473	5.53929	3.03706e-08	4.12499e-07	3252.69	2153.08	2695.8	1320.59	1141.26	944.407	1227.36	SPINT1
gene11671	440.137	1.51741	0.262111	5.78916	7.07393e-09	1.17899e-07	795.776	548.075	757.597	272.797	287.501	162.383	256.831	RHOV
gene11672	501.478	1.60064	0.240488	6.65581	2.81744e-11	1.04963e-09	897.914	707.027	832.879	268.664	337.036	193.89	272.936	VPS18
gene11673	146.077	1.36526	0.312991	4.36196	1.28902e-05	7.47446e-05	190.807	206.431	276.033	105.399	113.64	75.1324	55.0958	DLL4
gene11674	3213.54	1.2911	0.293006	4.40641	1.05099e-05	6.27513e-05	3986.74	6935.06	3639.81	1562.38	1504.52	2790.4	2075.84	CHAC1
gene11676	27.765	-1.58761	0.509339	-3.11699	0.00182707	0.00532609	12.3463	13.418	13.1444	30.9997	30.1099	63.8222	30.5146	EXD1
gene11679	314.315	-1.20013	0.236207	-5.08082	3.75804e-07	3.55238e-06	215.499	184.756	141.004	421.596	373.945	471.799	391.604	OIP5
gene11687	1946.15	1.22587	0.201803	6.07459	1.24308e-09	2.73615e-08	3267.28	2449.31	2959.89	1399.12	1187.88	1055.89	1303.65	TYRO3
gene1169	2964.26	1.05746	0.190973	5.5372	3.07346e-08	4.15957e-07	4277.44	3969.67	4399.8	2182.38	2174.71	1632.72	2113.13	CERS2
gene11694	1739.17	1.49313	0.288126	5.18221	2.19276e-07	2.25745e-06	3652.27	2580.39	2027.83	1417.72	850.846	967.027	678.102	PLA2G4B
gene1170	2481.73	1.13798	0.204803	5.55644	2.75326e-08	3.79683e-07	3898.07	2978.8	3940.94	1773.18	1608.45	1361.27	1811.38	FAM63A
gene11714	1980.39	-1.0146	0.187559	-5.40949	6.32028e-08	7.81467e-07	1086.48	1359.35	1307.27	2320.84	2381.59	2701.54	2705.63	UBR1
gene11718	76.3432	-1.17016	0.30056	-3.89328	9.88997e-05	0.000434752	43.7733	43.3506	46.603	87.8324	101.985	107.447	103.411	EPB42
gene11724	524.903	-2.11059	0.375621	-5.61894	1.92131e-08	2.81048e-07	254.783	201.27	87.2312	632.394	1260.73	767.482	470.433	MDGA2
gene11733	1133.51	-1.54688	0.393535	-3.93072	8.46917e-05	0.000379925	630.785	625.487	364.459	592.094	1333.58	2807.37	1580.82	RPS29
gene11738	768.989	-1.12081	0.214303	-5.23003	1.69487e-07	1.81821e-06	503.954	457.245	419.427	820.458	914.951	1181.92	1084.96	POLE2
gene11739	778.96	-1.04942	0.2511	-4.17931	2.92401e-05	0.000150831	402.939	642.001	405.088	764.659	984.884	1116.48	1136.67	KLHDC1
gene11741	3862.43	-1.16649	0.251015	-4.6471	3.36628e-06	2.34665e-05	2882.3	2124.18	1764.94	3531.9	5335.27	5331.98	6066.47	NEMF
gene11742	1924.51	1.13281	0.274189	4.1315	3.604e-05	0.000181153	2609.56	2425.57	3342.27	1265.82	1525.89	735.167	1567.26	ARF6
gene11745	1251.39	-1.39941	0.259125	-5.4005	6.64539e-08	8.1343e-07	670.068	828.821	439.741	1635.75	1515.21	2189.34	1480.8	VCPKMT
gene11749	236.963	-1.09123	0.307415	-3.5497	0.000385667	0.00140228	102.138	158.952	170.878	375.096	188.429	370.815	292.431	CDKL1
gene11751	375.552	-1.16472	0.211171	-5.51553	3.47728e-08	4.63071e-07	199.786	248.75	210.311	477.395	450.677	546.932	495.014	ATL1
gene11763	10408.9	-2.05562	0.265262	-7.7494	9.23302e-15	1.09642e-12	3286.37	4981.19	2867.88	13401.2	11461.2	20253.4	16610.9	FRMD6
gene11769	115.039	1.48649	0.329557	4.51056	6.46568e-06	4.09949e-05	205.398	134.18	205.531	77.4992	87.4157	45.241	50.01	LOC105607710
gene11770	164.566	1.26388	0.356221	3.54801	0.00038815	0.00140951	140.299	241.525	358.485	140.532	113.64	89.6742	67.8102	PLEKHO2
gene11779	1253.52	-1.11167	0.249374	-4.45784	8.27904e-06	5.08884e-05	845.162	735.927	679.926	1149.06	1501.61	1630.29	2232.65	KIAA0101
gene11781	1513.19	-1.71518	0.279284	-6.14134	8.18296e-10	1.93005e-08	625.173	943.391	400.308	1965.38	2026.1	2624.79	2007.18	CSNK1G1
gene11786	796.928	-1.32296	0.334257	-3.95792	7.56039e-05	0.00034457	363.655	614.133	308.297	1527.25	670.187	1333.8	761.169	DAPK2
gene11790	6168.75	-1.23245	0.204597	-6.02382	1.7035e-09	3.57422e-08	3664.61	3781.82	3001.71	7133.03	7052.51	9496.58	9050.96	USP3
gene11805	32.8788	1.32505	0.41156	3.21958	0.00128379	0.00392504	47.1405	43.3506	59.7474	22.7331	18.4544	22.6205	16.1049	C2CD4B
gene11809	13508.2	-1.87537	0.224413	-8.35675	6.44682e-17	1.51015e-14	6589.57	5061.69	4397.41	15743.7	20552.4	23665.9	18546.9	RORA
gene1181	91.7834	1.1742	0.320124	3.66795	0.000244499	0.000946983	138.054	112.505	152.953	64.066	81.588	50.0883	43.229	SEMA6C
gene11810	846.261	-1.0367	0.202812	-5.11163	3.19385e-07	3.08066e-06	549.972	498.531	537.727	945.49	1117.95	1292.6	981.552	ICE2
gene11827	368.304	-1.35785	0.347604	-3.90631	9.3718e-05	0.000415176	179.583	306.55	96.7908	408.163	686.699	479.07	421.271	LIPC
gene11835	10337.9	-1.54624	0.216548	-7.14039	9.30663e-13	5.87245e-11	4641.09	5583.97	4561.12	10495.5	15278.3	15167.1	16638.1	TCF12
gene11836	2696.47	-1.26128	0.256658	-4.91423	8.91327e-07	7.48242e-06	1553.39	1464.63	1480.54	2469.64	3503.43	3180.61	5223.08	ZNF280D
gene11840	1023.58	-1.33737	0.229902	-5.81712	5.98699e-09	1.03612e-07	656.6	538.786	444.521	1090.16	1364.66	1408.13	1662.2	TEX9
gene11851	792.071	-1.37854	0.251558	-5.47999	4.2534e-08	5.51844e-07	401.816	512.982	326.221	826.658	946.032	1193.23	1337.56	PIGB
gene11857	260.719	-1.877	0.344225	-5.45285	4.95689e-08	6.33031e-07	118.974	127.987	62.1373	241.798	464.275	285.18	524.681	UNC13C
gene11875	166.182	-1.1121	0.278485	-3.99338	6.51373e-05	0.000302758	111.117	90.8297	97.9858	213.898	151.521	268.215	229.707	LOC105607297
gene11880	445.191	-1.24425	0.318159	-3.91078	9.19992e-05	0.00040862	132.442	346.804	270.058	493.928	473.016	761.827	638.263	DMXL2
gene1189	3262.71	1.07966	0.306434	3.52329	0.00042622	0.00152636	6197.85	3403.02	4403.39	1822.78	2761.37	1298.26	2952.29	PSMD4
gene11892	418.763	-2.04001	0.288827	-7.06308	1.62856e-12	9.40823e-11	143.666	215.721	92.011	580.727	595.398	754.556	549.262	USP50
gene11899	624.839	-1.27552	0.2897	-4.40292	1.06805e-05	6.35038e-05	249.171	470.663	314.271	617.927	1170.4	803.836	747.607	ATP8B4
gene11903	225.512	-1.15641	0.241462	-4.78921	1.67443e-06	1.28053e-05	114.484	154.823	127.859	257.297	345.778	287.604	290.736	FAM227B
gene1192	487.075	1.48908	0.216424	6.88037	5.96952e-12	2.86738e-10	748.636	786.503	775.522	344.097	273.903	235.9	244.964	ZNF687
gene11938	344.759	1.00726	0.259846	3.87639	0.000106019	0.000462363	536.504	386.026	528.167	318.263	199.114	253.673	191.564	DUOXA1
gene11954	461.513	-1.02603	0.240194	-4.27166	1.94026e-05	0.000106171	316.515	248.75	304.712	459.829	627.451	529.966	743.369	CGRRF1
gene1196	3457.41	1.88779	0.259176	7.28381	3.24516e-13	2.42324e-11	6761.29	4908.93	6120.53	1959.18	1796.88	976.722	1678.3	SELENBP1
gene11962	13308.1	1.02306	0.269192	3.80048	0.000144418	0.000602623	22813.7	13243.6	20193.4	7984.49	12519.9	6628.62	9773.14	LGALS3
gene11963	936.885	-1.07851	0.225544	-4.78183	1.73704e-06	1.32427e-05	580.277	592.458	546.091	966.157	1160.69	1117.29	1595.23	DLGAP5
gene11974	1580.05	-1.34501	0.226528	-5.9375	2.89404e-09	5.54178e-08	796.899	1025.96	697.85	1633.68	2374.79	2312.95	2218.24	PELI2
gene11982	13.0124	-3.28043	0.866074	-3.7877	0.00015205	0.000630773	2.24478	4.12862	0	12.3999	17.4831	22.6205	32.2098	C7H14orf105
gene11993	827.22	-1.1618	0.238734	-4.86651	1.13588e-06	9.17934e-06	383.858	620.326	449.301	919.657	998.482	1106.79	1312.13	KIAA0586
gene120	4626.51	1.06075	0.2242	4.73127	2.23121e-06	1.6375e-05	7335.96	5114.33	7307.11	2890.2	3498.57	2549.66	3689.72	EFHD1
gene12001	1214	-1.21412	0.200554	-6.05383	1.41439e-09	3.06489e-08	697.006	757.603	621.373	1340.22	1549.2	1729.66	1802.9	JKAMP
gene12002	108.49	-1.49241	0.474698	-3.14392	0.001667	0.00492328	50.5077	98.0548	10.7545	132.265	146.664	173.693	147.487	CCDC175
gene12006	112.173	-1.20032	0.349541	-3.43398	0.000594785	0.00203173	53.8748	95.9905	43.0181	104.366	143.75	153.496	190.716	LOC101117591
gene12007	1672.73	-1.2636	0.241051	-5.24204	1.58815e-07	1.7134e-06	750.881	1261.29	774.327	1854.81	2279.61	2274.98	2513.21	PCNXL4
gene12019	1811.72	-1.61251	0.253137	-6.37009	1.88914e-10	5.50329e-09	1022.5	882.494	592.694	1906.48	2445.7	2695.07	3137.07	MNAT1
gene12024	5012.45	-1.03174	0.20402	-5.05705	4.25794e-07	3.93997e-06	2926.08	3600.16	2890.58	5695.68	5483.88	7464.77	7025.98	PRKCH
gene12028	238.862	1.38239	0.250857	5.51067	3.57473e-08	4.74227e-07	365.9	346.804	393.138	147.765	162.205	98.5608	157.659	LOC101118878
gene12038	590.78	-1.07761	0.258715	-4.16525	3.11009e-05	0.000159277	448.957	358.158	277.228	580.727	686.699	803.836	979.857	WDR89
gene12046	684.353	-1.11263	0.261448	-4.25564	2.08455e-05	0.000112768	387.225	561.493	284.398	763.626	837.248	1064.78	891.704	ZBTB25
gene12050	3149.86	1.68845	0.320353	5.27058	1.35992e-07	1.50223e-06	5935.21	3619.77	6041.66	1402.22	2300.01	834.536	1915.64	HSPA2
gene12051	500.087	-1.23617	0.304079	-4.0653	4.7971e-05	0.000232317	316.515	362.287	166.098	560.061	742.062	862.811	490.776	PPP1R36
gene12053	368.58	1.43381	0.272295	5.26567	1.3968e-07	1.53702e-06	545.483	457.245	724.139	270.731	238.936	150.265	193.259	SPTB
gene12056	1014.82	1.32891	0.323215	4.11153	3.93053e-05	0.000195157	2323.35	886.622	1430.35	637.56	810.052	407.169	608.596	LOC105615749
gene1206	40.014	-1.5923	0.416323	-3.82466	0.000130952	0.000554275	16.8359	18.5788	20.3141	76.4659	50.5069	53.3198	44.0766	LOC105613572
gene12062	1154.91	-1.05866	0.247022	-4.2857	1.82168e-05	0.000100519	730.677	668.837	740.868	1048.82	2018.33	1309.57	1567.26	FUT8
gene12069	3734.18	-1.6212	0.254808	-6.36245	1.98559e-10	5.7451e-09	1918.17	2029.22	1175.83	3852.23	5074.97	6150.36	5938.48	GPHN
gene1207	13182.3	-1.00967	0.292712	-3.44935	0.000561938	0.00193226	10986	6420.01	7638.11	10174.1	17978.5	15257.5	23821.7	SNX27
gene12073	125.186	-1.5974	0.328212	-4.86697	1.1332e-06	9.1664e-06	49.3853	84.6368	39.4333	219.064	141.808	181.772	160.202	ATP6V1D
gene12074	661.75	-1.40036	0.253637	-5.52111	3.36866e-08	4.50384e-07	379.369	401.509	243.77	772.926	738.177	1061.55	1034.95	EIF2S1
gene12077	5035.32	1.55124	0.231341	6.70542	2.00823e-11	7.86524e-10	9432.59	5647.96	9144.94	3101	2745.83	2338.8	2836.16	TMEM229B
gene12087	3429.32	-1.79558	0.265862	-6.75379	1.4403e-11	5.94905e-10	1827.25	1410.96	1026.46	3550.5	4732.1	4897.34	6560.63	RAD51B
gene12097	1675.53	1.00493	0.244231	4.11467	3.87741e-05	0.000193147	1706.04	2317.19	3023.22	1451.82	1143.2	1026	1061.23	ZFP36L1
gene12098	5424.18	1.32794	0.214683	6.18559	6.18705e-10	1.51574e-08	8245.09	7614.22	8938.22	3890.46	3842.41	2694.27	2744.62	ACTN1
gene1210	181.565	-1.00895	0.27682	-3.64478	0.000267621	0.00102287	144.789	117.666	82.4515	239.731	183.573	239.131	263.612	RIIAD1
gene12111	447.869	-1.55866	0.334812	-4.65534	3.23444e-06	2.26676e-05	219.989	311.711	103.961	570.394	500.212	849.885	578.929	SLC10A1
gene12126	1231.4	-1.05025	0.23236	-4.51994	6.18585e-06	3.94989e-05	921.484	806.114	564.016	1380.52	1422.93	1665.03	1859.69	MED6
gene1213	34.7213	1.4927	0.47782	3.12397	0.0017843	0.00521832	33.6718	60.8972	70.502	18.5998	12.6267	14.5418	32.2098	TDRKH
gene12131	3693.06	-1.09222	0.21767	-5.01779	5.22696e-07	4.74165e-06	2057.35	2674.32	1995.56	3766.46	4985.61	5724.61	4647.54	SIPA1L1
gene12133	544.002	-1.65722	0.333905	-4.96314	6.93621e-07	5.99945e-06	243.559	373.641	113.52	802.892	925.635	736.783	611.987	RGS6
gene12166	862.516	-1.08581	0.224204	-4.84297	1.2791e-06	1.01686e-05	475.894	646.13	454.08	937.224	1023.74	1239.28	1261.27	LIN52
gene12177	1067.03	-1.03793	0.296247	-3.5036	0.00045901	0.00162709	973.114	529.496	495.904	923.791	1478.3	1305.53	1763.06	FCF1
gene12183	1120.43	1.04836	0.23127	4.53307	5.81328e-06	3.74895e-05	1936.13	1376.9	1455.45	847.325	713.895	597.02	916.285	EIF2B2
gene12201	248.07	1.02668	0.305342	3.36241	0.000772657	0.002544	474.772	197.142	377.604	192.198	188.429	147.841	158.506	LOC101110679
gene12206	815.225	-1.30958	0.287003	-4.56293	5.04438e-06	3.3266e-05	481.506	607.94	235.405	1094.29	1076.18	1158.49	1052.75	IFT43
gene12216	1304.13	1.64825	0.254145	6.48546	8.84639e-11	2.81701e-09	1981.02	1953.87	2468.76	812.192	855.703	457.258	600.12	IRF2BPL
gene12250	772.605	-1.31653	0.281968	-4.66907	3.02559e-06	2.14146e-05	382.736	569.75	298.737	704.726	1090.75	1067.2	1294.33	CEP128
gene12268	44.0819	-1.53047	0.507751	-3.01422	0.00257641	0.00712083	11.2239	42.3184	9.55959	74.3993	63.1336	63.0143	44.9242	KCNK10
gene12269	739.35	-1.13929	0.268984	-4.23553	2.28011e-05	0.000121767	376.001	637.873	299.932	1022.99	868.33	1059.13	911.199	SPATA7
gene1227	483.145	-1.8594	0.421727	-4.40902	1.03839e-05	6.21291e-05	185.195	214.688	179.242	1312.32	223.396	758.595	508.576	RPTN
gene12272	1236.38	-1.09268	0.194435	-5.61976	1.91222e-08	2.80197e-07	691.394	790.632	769.547	1630.58	1712.38	1735.32	1324.84	EML5
gene12276	4265.07	-1.37181	0.25013	-5.48438	4.14916e-08	5.40783e-07	2468.14	2798.18	1441.11	6656.67	5084.68	6094.61	5312.08	FOXN3
gene12278	1106.29	-1.0074	0.257867	-3.90665	9.35834e-05	0.000414794	967.502	689.48	446.911	1358.82	1353.97	1488.11	1439.27	EFCAB11
gene12281	3203.5	1.28202	0.261273	4.90681	9.25684e-07	7.72502e-06	6594.06	3544.42	4344.83	1807.28	2320.4	1515.57	2297.92	PSMC1
gene12287	2090.96	-1.02439	0.324316	-3.15861	0.00158521	0.00471837	1371.56	1930.13	640.492	3394.47	2217.45	2923.7	2158.91	TTC7B
gene12290	1590.24	-1.0264	0.249024	-4.12169	3.76104e-05	0.000188217	802.511	1365.54	826.904	2430.38	1661.87	2005.96	2038.54	RPS6KA5
gene12317	6638.17	-1.0548	0.216502	-4.87201	1.10467e-06	8.95679e-06	3887.97	4299.96	4138.11	6183.4	8998.96	8581.26	10377.5	SENP6
gene12321	68.4661	-1.33769	0.357845	-3.73817	0.000185367	0.000746004	48.2629	35.0933	26.2889	92.9991	75.7603	121.181	79.677	IMPG1
gene12327	166.141	-1.63818	0.409135	-4.00402	6.22751e-05	0.000291435	46.0181	129.02	50.1878	197.365	363.261	138.955	238.183	MEI4
gene12329	6169.34	-1.01378	0.226651	-4.47288	7.71747e-06	4.78841e-05	4189.89	3978.96	3527.49	5821.74	7819.82	7547.98	10299.5	PHIP
gene1234	1312.74	1.24488	0.286604	4.34353	1.40211e-05	8.02948e-05	2571.4	1482.18	1827.08	619.994	1238.39	743.246	706.921	LOC101121219
gene12351	853.875	-1.58627	0.263235	-6.02605	1.68017e-09	3.5383e-08	454.569	477.888	261.694	1011.62	1078.13	1526.89	1166.33	UBE3D
gene12366	269.303	-1.43561	0.254547	-5.63988	1.70172e-08	2.53479e-07	126.83	175.467	106.35	329.63	423.481	389.396	333.965	KIAA0408
gene12374	616.619	-1.1237	0.2191	-5.1287	2.91746e-07	2.86386e-06	396.205	399.444	309.492	669.593	751.775	851.501	938.323	TRMT11
gene12376	1120.64	-1.11564	0.192677	-5.79021	7.02979e-09	1.17287e-07	564.563	762.763	689.485	1445.62	1384.08	1518	1479.96	NCOA7
gene12383	892.36	-1.69997	0.233525	-7.27961	3.34779e-13	2.47824e-11	365.9	494.403	310.687	1013.69	1345.23	1396.01	1320.6	RNF217
gene12385	133.786	-2.32932	0.447509	-5.20507	1.9392e-07	2.02197e-06	29.1822	77.4117	14.3394	173.598	291.386	144.61	205.973	NKAIN2
gene1239	359.401	1.63437	0.305839	5.34388	9.09786e-08	1.06193e-06	557.829	643.033	558.041	267.631	212.712	98.5608	178.002	LOC101121986
gene12393	860.142	-1.05549	0.351832	-2.99997	0.00270004	0.0074146	835.06	282.811	479.174	644.794	1064.53	1281.29	1433.34	FABP7
gene12394	1748.65	-1.02729	0.293475	-3.50043	0.000464511	0.00164352	1238	734.895	1320.42	1964.35	1480.24	2311.33	3191.32	PKIB
gene124	42.3111	-1.96936	0.44206	-4.45495	8.39114e-06	5.14665e-05	17.9583	16.5145	13.1444	37.1996	66.0474	61.3986	83.9151	LOC106990793
gene1240	210.602	2.69701	0.403526	6.68361	2.33131e-11	8.9167e-10	591.501	199.206	432.571	36.1663	61.191	48.4725	105.106	C1H1orf68
gene12402	680.928	-1.40255	0.26521	-5.28846	1.23349e-07	1.3786e-06	307.536	407.702	338.17	637.56	877.071	901.589	1296.87	TBC1D32
gene12403	998.101	1.45748	0.289265	5.03857	4.69013e-07	4.30033e-06	1847.46	1275.75	1579.72	503.228	792.569	334.461	653.521	LOC101122794
gene12411	471.347	-1.04173	0.261093	-3.98986	6.61112e-05	0.000306605	295.189	307.583	278.423	376.13	694.469	622.064	725.569	CEP85L
gene12416	351.455	-1.08157	0.322487	-3.35384	0.000796973	0.00261278	199.786	276.618	167.293	237.664	436.107	583.286	559.434	SLC35F1
gene12423	24.122	-2.18895	0.624423	-3.50556	0.000455644	0.0016165	5.61196	14.4502	3.58485	22.7331	24.2821	37.1623	61.0292	ROS1
gene12428	98.3542	-1.19886	0.357363	-3.35473	0.000794416	0.00260639	57.242	69.1545	43.0181	79.5659	145.693	109.871	183.935	FAM162B
gene12429	226.404	-1.09001	0.319651	-3.40999	0.000649654	0.00219287	87.5466	179.595	145.784	203.565	259.333	302.146	406.861	KPNA5
gene12439	1012.53	1.23145	0.257797	4.77684	1.78071e-06	1.35154e-05	1368.2	1317.03	1835.44	590.027	729.436	433.021	814.57	TSPYL1
gene1244	509.542	1.93776	0.392659	4.93498	8.01604e-07	6.81284e-06	1288.51	418.023	939.23	320.33	154.434	129.26	317.013	LOC105613519
gene1245	80.1546	1.9489	0.416281	4.68169	2.84514e-06	2.0297e-05	188.562	63.9937	164.903	28.933	28.1673	33.1229	53.4005	LOC101122647
gene12478	84.0044	-1.07231	0.359995	-2.97869	0.00289482	0.00786985	37.039	48.5113	69.307	69.2326	145.693	112.295	105.953	METTL24
gene12486	2514.79	1.14031	0.282936	4.03029	5.5707e-05	0.000264306	4096.73	3863.36	3007.69	2571.94	1475.38	1485.68	1102.76	MICAL1
gene12488	168.508	-1.5672	0.312684	-5.01208	5.38442e-07	4.86284e-06	78.5675	112.505	46.603	215.964	232.137	283.564	210.212	PPIL6
gene1249	556.875	1.93197	0.307398	6.28492	3.28016e-10	8.77789e-09	1340.14	643.033	905.771	226.298	239.908	179.348	363.632	LOC106990801
gene12491	327.584	-1.44538	0.26604	-5.43295	5.54289e-08	6.98477e-07	179.583	190.949	124.275	327.563	560.432	449.179	461.109	LOC101108397
gene12493	1097.66	-1.28076	0.256696	-4.98941	6.05648e-07	5.36055e-06	734.045	564.589	513.828	1004.39	1657.01	1348.34	1861.39	CEP57L1
gene12494	3051.38	-1.04999	0.179465	-5.85068	4.89579e-09	8.74796e-08	1841.85	1979.68	1858.15	3452.33	4235.78	3746.12	4245.76	SESN1
gene12497	649.644	-1.68017	0.246669	-6.81147	9.66093e-12	4.33601e-10	319.882	343.708	198.361	773.959	876.1	992.071	1043.43	LACE1
gene1250	2988.08	2.12078	0.294298	7.20621	5.75298e-13	3.93504e-11	6257.34	3746.73	6004.62	1100.49	1515.21	719.009	1573.2	SPRR4
gene12509	1315.13	-1.17924	0.192596	-6.12284	9.19242e-10	2.12707e-08	819.346	788.567	682.316	1502.45	1820.19	1672.3	1920.72	PDSS2
gene1251	19259.7	1.92082	0.287028	6.69212	2.19967e-11	8.51003e-10	37465.5	24818.2	37423.4	8646.85	9730.34	4962.78	11771	LOC101102105
gene12551	324.001	-1.28189	0.273014	-4.69532	2.66192e-06	1.91901e-05	116.729	213.656	204.336	388.529	361.318	461.297	522.138	USP45
gene12552	10562	-1.16935	0.276857	-4.22366	2.40371e-05	0.000127452	8664.87	6096.95	3727.04	10743.5	14614.9	15206.6	14880.1	PNISR
gene12559	954.897	-1.11842	0.240206	-4.65606	3.2231e-06	2.26306e-05	483.751	725.606	506.658	1004.39	1093.67	1409.74	1460.46	MMS22L
gene12579	219.634	-1.01936	0.312834	-3.25847	0.00112014	0.00348699	121.218	141.405	152.953	171.532	244.764	285.988	419.575	EPHA7
gene12590	2216.03	-1.0967	0.225273	-4.8683	1.12563e-06	9.11809e-06	1501.76	1457.4	1068.28	2600.87	2301.95	3409.24	3172.67	BACH2
gene12591	33.6621	-1.44535	0.472254	-3.06054	0.00220935	0.00625909	10.1015	21.6753	19.1192	27.8997	55.3633	56.5513	44.9242	GJA10
gene12592	1634.93	-1.0869	0.233453	-4.65577	3.2277e-06	2.26482e-05	996.684	989.838	1000.17	1462.15	2226.19	2068.97	2700.54	CASP8AP2
gene12607	1782.84	-1.05254	0.227437	-4.62781	3.69558e-06	2.54406e-05	1161.68	1178.72	973.883	1713.25	2222.3	2287.1	2942.96	RNGTT
gene12620	3244.16	-1.11199	0.238725	-4.65804	3.19236e-06	2.24463e-05	2142.65	1980.71	1726.7	2885.04	4643.72	4004.64	5325.64	ZNF292
gene12637	745.678	-1.22414	0.20162	-6.0715	1.2672e-09	2.78524e-08	427.632	465.502	375.214	838.025	993.625	1054.28	1065.47	LOC101117851
gene1264	139.31	1.60302	0.259905	6.16771	6.92872e-10	1.67398e-08	230.09	208.496	238.99	88.8658	61.191	67.8616	79.677	LOC101121908
gene12641	33.5924	-2.79326	0.618995	-4.51258	6.40451e-06	4.06824e-05	11.2239	10.3216	1.19495	23.7664	87.4157	44.4332	56.791	THEMIS
gene12642	4283.89	-1.22017	0.200554	-6.084	1.17218e-09	2.63048e-08	2398.55	2537.04	2367.19	4422.62	6128.81	5563.03	6569.96	PTPRK
gene12652	171.879	-2.32729	0.325788	-7.14359	9.09275e-13	5.80172e-11	39.2837	79.476	37.0434	277.964	218.539	226.205	324.641	TMEM244
gene12658	3.50539	-4.90912	1.66397	-2.95024	0.00317524	0.00852915	0	0	0	2.06665	7.77029	11.3103	3.39051	SMLR1
gene1267	113.538	1.91796	0.360751	5.31658	1.05734e-07	1.20698e-06	313.147	148.63	125.47	64.066	47.593	50.0883	45.7719	S100A9
gene1269	123.672	1.19062	0.283331	4.20222	2.64308e-05	0.000138194	222.234	185.788	138.614	75.4326	67.99	82.4033	93.239	S100A8
gene12697	837.237	-1.36098	0.262076	-5.19307	2.06856e-07	2.14638e-06	389.47	598.651	335.781	1269.95	845.019	1324.11	1097.68	SLC18B1
gene12711	1972.27	-1.30218	0.227015	-5.73608	9.68907e-09	1.54844e-07	1200.96	1157.05	861.558	1996.38	2594.3	3006.91	2988.73	AHI1
gene12714	850.081	-1.80018	0.254697	-7.06791	1.57287e-12	9.14834e-11	346.819	465.502	241.38	991.99	1347.17	1232.01	1325.69	PDE7B
gene12722	3496.46	-1.20209	0.223682	-5.37411	7.69636e-08	9.20334e-07	1911.43	2534.98	1570.16	4097.13	4159.05	5297.24	4905.22	MAP3K5
gene12724	141.198	2.93552	0.46859	6.26459	3.73803e-10	9.78871e-09	289.577	215.721	335.781	36.1663	76.7316	24.2363	10.1715	SLC35D3
gene12727	90.3722	-2.09307	0.377176	-5.54933	2.86774e-08	3.93687e-07	48.2629	23.7396	22.704	114.699	98.0999	180.156	144.944	IL22RA2
gene1274	295.25	4.32253	1.1965	3.61265	0.000303079	0.00113754	144.789	1731.96	60.9424	27.8997	11.6554	24.2363	65.2673	LOC101104285
gene12741	104.984	-1.53399	0.398595	-3.84849	0.000118851	0.000510511	42.6509	61.9294	46.603	97.1324	101.014	122.797	262.764	ECT2L
gene12745	81.3625	-1.02143	0.310577	-3.28882	0.0010061	0.00318127	58.3644	55.7364	39.4333	85.7658	114.612	113.91	101.715	TXLNB
gene12746	1968.44	1.09068	0.245174	4.4486	8.64336e-06	5.27674e-05	2626.4	2403.89	3443.84	1186.25	1460.81	970.259	1687.63	CITED2
gene12754	2640.65	-1.13329	0.209622	-5.40632	6.43326e-08	7.91817e-07	1333.4	1931.16	1444.69	3029.7	3781.22	3733.19	3231.15	HIVEP2
gene1276	2376.63	1.37637	0.334586	4.11364	3.89472e-05	0.000193773	4556.91	2519.49	3914.65	1126.32	2373.82	812.723	1332.47	S100A4
gene12763	217.768	-1.38889	0.319179	-4.35146	1.35237e-05	7.78111e-05	97.6481	176.499	64.5272	302.764	270.989	327.998	283.955	ZC2HC1B
gene1277	7193.3	1.07302	0.278394	3.85431	0.000116056	0.000499886	15427.3	6655.34	8737.46	5149.05	5443.09	4028.88	4912	S100A3
gene12781	9.70043	-3.90759	1.2023	-3.2501	0.00115366	0.00357385	0	3.09647	0	10.3332	5.82772	10.5024	38.1432	GRM1
gene12783	17.2539	-2.33644	0.64188	-3.63999	0.000272646	0.00103921	5.61196	4.12862	5.97474	14.4665	30.1099	28.2757	32.2098	ADGB
gene12787	18547	-1.81281	0.204038	-8.88467	6.41096e-19	2.81096e-16	7414.52	9060.27	6364.3	26040.8	24509.4	31554	24885.5	SASH1
gene1279	5549.04	1.52366	0.333904	4.56315	5.03907e-06	3.32516e-05	12644.9	5655.18	8236.78	2722.81	4154.19	1628.68	3800.76	S100A16
gene12806	50.1248	-1.3784	0.389125	-3.54231	0.000396639	0.00143424	29.1822	27.8682	21.5091	66.1327	51.4782	94.5215	60.1815	PCMT1
gene12831	34.2644	-2.87019	0.536917	-5.34569	9.00715e-08	1.05423e-06	6.73435	6.19294	9.55959	33.0663	41.7653	66.2458	76.2864	RGS17
gene1285	70.4962	2.17337	0.389151	5.58491	2.33825e-08	3.30964e-07	87.5466	159.984	132.639	42.3662	32.0524	19.389	19.4954	NPR1
gene12853	1193.1	-1.70901	0.277448	-6.15974	7.28645e-10	1.74998e-08	472.527	757.603	327.416	1601.65	1879.44	1866.19	1446.9	ZDHHC14
gene1286	79.2055	1.14089	0.357386	3.19232	0.00141134	0.00425792	112.239	129.02	103.961	40.2996	81.588	33.9308	53.4005	LOC106990802
gene1287	1510.19	1.1659	0.198757	5.86599	4.46461e-09	8.13045e-08	2209.99	2098.37	2321.79	1171.79	1039.28	893.511	836.608	INTS3
gene12882	1529.08	1.31906	0.284838	4.63091	3.6406e-06	2.51126e-05	2836.29	1676.22	2462.79	963.057	1246.16	566.321	952.733	ACAT2
gene12888	32.376	1.90607	0.470585	4.05042	5.11263e-05	0.000245097	46.0181	52.64	68.1121	23.7664	15.5406	12.926	7.62864	LOC106991323
gene12889	568.761	1.88091	0.311171	6.04461	1.49769e-09	3.22957e-08	1195.35	757.603	969.103	390.596	310.811	168.846	189.021	LOC106991303
gene12898	2937.62	-1.91729	0.244507	-7.84146	4.45352e-15	5.99296e-13	1293	1337.67	775.522	3801.6	3665.63	5101.74	4588.21	PARK2
gene129	387.942	1.93103	0.317888	6.07456	1.24327e-09	2.73615e-08	875.466	379.833	756.402	204.598	197.171	113.103	189.021	GJB4
gene12909	434.83	-2.07557	0.302385	-6.864	6.69608e-12	3.13707e-10	175.093	199.206	84.8413	741.926	475.93	628.527	738.283	PDE10A
gene12918	791.008	1.03137	0.235924	4.37162	1.23326e-05	7.18284e-05	950.666	1256.13	1143.57	733.659	455.533	485.533	511.967	RNASET2
gene1292	1706.52	1.32934	0.219024	6.06938	1.28408e-09	2.8187e-08	2455.79	2434.86	2913.28	1154.22	1131.55	748.901	1107	SLC39A1
gene12938	514.593	1.22351	0.315939	3.87261	0.000107677	0.000468638	519.668	730.767	1042	424.696	351.605	184.196	349.222	C8H6orf120
gene12940	168.583	-1.497	0.323328	-4.62997	3.65721e-06	2.52025e-05	103.26	102.183	41.8232	247.998	203.97	270.638	210.212	TCTE3
gene12959	591.933	-1.80118	0.276408	-6.51637	7.20297e-11	2.34611e-09	297.434	290.036	145.784	792.559	882.899	1021.96	712.854	KCNQ5
gene12967	157.775	-2.37532	0.30357	-7.82462	5.09177e-15	6.64651e-13	50.5077	60.8972	27.4838	238.698	252.534	265.791	208.516	B3GAT2
gene12969	954.792	-1.495	0.234848	-6.36582	1.94255e-10	5.63967e-09	556.707	472.728	375.214	1090.16	1130.58	1551.93	1506.23	SDHAF4
gene1297	2199.87	-1.33392	0.344238	-3.87499	0.000106627	0.000464423	1740.83	792.696	997.782	1469.39	3207.19	2946.32	4244.92	RPS27
gene12970	5279.23	-1.49291	0.190409	-7.84054	4.48596e-15	5.99296e-13	2406.41	2649.55	2719.7	7224.99	6112.3	8502.08	7339.6	FAM135A
gene12974	66.7227	-2.03262	0.482594	-4.21187	2.53267e-05	0.00013322	25.815	31.9968	14.3394	36.1663	155.406	88.0585	115.277	COL19A1
gene12978	30.898	-2.03613	0.543479	-3.74647	0.000179339	0.000725578	15.7135	8.25725	9.55959	23.7664	50.5069	34.7387	73.7436	ADGRB3
gene1299	160.433	-1.7506	0.345438	-5.06777	4.02494e-07	3.75896e-06	68.4659	103.216	32.2636	276.931	219.511	213.279	209.364	NUP210L
gene13	5206.84	1.21058	0.233095	5.1935	2.06374e-07	2.14268e-06	6806.19	7448.04	8870.1	3523.63	4124.08	2323.45	3352.37	2021-09-02
gene130	865.011	1.9071	0.32073	5.94612	2.74572e-09	5.33543e-08	1899.09	1008.42	1559.41	318.263	541.978	227.821	500.1	GJB3
gene13008	174.127	1.27257	0.26809	4.74678	2.06677e-06	1.53327e-05	327.739	232.235	225.845	102.299	86.4444	116.334	127.992	C9H8orf82
gene13011	302.201	1.0038	0.237705	4.22288	2.41201e-05	0.000127774	465.793	474.792	329.806	232.498	180.659	232.668	199.192	RECQL4
gene13017	369.064	1.3798	0.237719	5.80436	6.46121e-09	1.09937e-07	650.988	474.792	581.94	277.964	200.085	186.619	211.059	TONSL
gene13018	1440.3	1.3141	0.27314	4.81107	1.50125e-06	1.16612e-05	3084.33	1760.86	1717.14	914.491	1125.72	662.458	817.113	VPS28
gene13020	543.433	1.43994	0.289783	4.96902	6.7292e-07	5.85297e-06	844.039	994.999	710.994	444.329	241.85	363.544	204.278	CPSF1
gene13027	567.959	1.39687	0.261907	5.33345	9.6363e-08	1.1164e-06	1159.43	750.378	728.919	349.263	427.366	256.904	303.451	BOP1
gene13029	1754.51	1.22753	0.264346	4.64366	3.42291e-06	2.37934e-05	3094.44	2517.43	2213.04	1608.88	955.745	1099.52	792.531	MROH1
gene13032	384.473	1.2798	0.240566	5.31997	1.03786e-07	1.19031e-06	610.581	550.139	575.965	241.798	306.926	174.501	231.402	HGH1
gene13038	2046.4	1.33352	0.267796	4.97959	6.37185e-07	5.59699e-06	4271.83	2396.67	2699.39	1233.79	1594.85	898.358	1229.91	GPAA1
gene13040	363.027	1.40088	0.255114	5.49121	3.99196e-08	5.22684e-07	702.618	586.265	399.113	244.898	223.396	205.2	179.697	OPLAH
gene13043	554.982	1.44895	0.301068	4.81271	1.48899e-06	1.15946e-05	1217.8	668.837	722.944	320.33	458.447	227.821	268.698	GRINA
gene13046	8978.2	1.87876	0.311345	6.03435	1.59606e-09	3.41434e-08	15061.4	14761.9	16300.3	6925.33	3945.36	3595.05	2258.08	LOC101111462
gene13047	2927.22	1.82428	0.267928	6.80883	9.83935e-12	4.38158e-10	4547.93	4388.73	5948.45	2021.18	1270.44	1382.28	931.542	EPPK1
gene13048	76.8826	1.47298	0.36526	4.03268	5.51437e-05	0.00026186	122.341	146.566	94.4009	60.9661	30.1099	54.1277	29.6669	LOC105616111
gene13050	2065.03	1.35449	0.256711	5.27631	1.3181e-07	1.4617e-06	3865.52	2593.81	3041.14	1254.45	1666.73	858.772	1174.81	PUF60
gene13051	1823.97	1.22315	0.25494	4.79778	1.60435e-06	1.2369e-05	3103.42	2985	2037.39	1547.92	1010.14	1213.43	870.513	SCRIB
gene13054	2858.55	1.53636	0.269826	5.69389	1.24178e-08	1.91301e-07	4143.87	4306.16	5257.77	2395.24	1168.46	1505.07	1233.3	FAM83H
gene13059	836.355	1.19271	0.251402	4.74422	2.0931e-06	1.54944e-05	1677.98	1015.64	1003.76	511.495	650.762	453.218	541.634	TSTA3
gene13060	534.419	1.22589	0.32945	3.72103	0.000198411	0.000788848	1225.65	605.876	550.871	308.964	458.447	217.319	373.804	PYCRL
gene13061	240.403	2.17773	0.276812	7.8672	3.62666e-15	5.05305e-13	415.285	409.766	474.395	94.0324	111.698	58.9749	118.668	TIGD5
gene13063	160.616	1.6825	0.29235	5.7551	8.65926e-09	1.40221e-07	312.025	248.75	233.015	100.232	84.5019	51.704	94.0866	LOC106991335
gene13064	680.384	1.06265	0.272622	3.8979	9.70298e-05	0.000427796	1333.4	857.722	715.774	387.496	579.858	376.47	511.967	LOC101113505
gene13067	336.278	1.37459	0.246402	5.57864	2.42411e-08	3.41171e-07	655.477	455.181	443.326	234.564	209.798	163.191	192.411	GSDMD
gene13070	130.697	1.65464	0.299614	5.52258	3.34049e-08	4.47668e-07	288.455	163.081	191.192	59.9327	82.5593	69.4773	60.1815	RHPN1
gene13083	1483.82	2.66067	0.346147	7.68655	1.51155e-14	1.60544e-12	4314.48	1624.61	2638.45	399.896	712.924	299.722	396.69	LOC105614075
gene13084	318.349	1.71491	0.411403	4.16845	3.06678e-05	0.0001572	949.544	269.393	365.654	121.932	264.19	119.566	138.163	LY6D
gene13085	1391.18	1.6554	0.395524	4.18533	2.84755e-05	0.00014751	3458.09	1319.1	2064.87	501.162	1143.2	329.613	922.218	LYNX1
gene13087	85.8668	1.75153	0.518631	3.37721	0.000732243	0.00243086	59.4868	155.856	215.091	23.7664	81.588	16.9654	48.3147	SLURP1
gene13088	120.032	1.59957	0.386065	4.14326	3.42404e-05	0.00017325	259.273	157.92	166.098	66.1327	70.9039	26.6599	93.239	THEM6
gene1309	3.93499	-5.07397	1.57956	-3.21228	0.00131686	0.00401182	0	0	0	5.16661	4.85643	5.65513	11.8668	AQP10
gene13090	313.678	1.70684	0.298313	5.72164	1.05503e-08	1.6597e-07	527.524	474.792	555.651	214.931	202.999	96.9451	122.906	JRK
gene13091	70.4748	2.28885	0.391802	5.84186	5.16215e-09	9.16643e-08	138.054	112.505	136.224	45.4662	27.196	17.7733	16.1049	ARC
gene13097	128.2	1.18658	0.302989	3.91623	8.99445e-05	0.000400326	227.846	161.016	176.852	69.2326	119.468	74.3246	68.6578	PTP4A3
gene1310	775.826	1.32857	0.301363	4.40853	1.04072e-05	6.2225e-05	754.248	1348	1444.69	686.126	393.371	466.144	338.203	ATP8B2
gene13110	32.0348	-2.27423	0.603478	-3.76853	0.000164209	0.000674022	4.48957	21.6753	3.58485	46.4995	33.0237	75.1324	39.8385	FAM135B
gene13125	5293.88	1.05869	0.207115	5.11162	3.19416e-07	3.08066e-06	9039.75	6545.93	7008.37	4338.92	3485.95	3246.04	3392.2	NDRG1
gene13133	115.006	-2.96454	0.378314	-7.83619	4.6442e-15	6.15627e-13	32.5494	25.8039	11.9495	200.465	137.923	248.018	148.335	KCNQ3
gene13162	4755.44	-1.53525	0.262257	-5.85399	4.79928e-09	8.61151e-08	2590.48	2838.43	1413.62	5490.04	6180.29	7953.54	6821.7	NSMCE2
gene13173	1418.13	-1.40508	0.231046	-6.08139	1.19144e-09	2.66322e-08	842.917	820.564	526.972	1590.28	1956.17	2064.12	2125.85	TATDN1
gene13179	36.2894	-1.42695	0.47998	-2.97293	0.00294975	0.00799251	13.4687	31.9968	9.55959	57.8661	38.8514	57.3592	44.9242	FER1L6
gene13181	152.75	-1.65746	0.296057	-5.59844	2.16289e-08	3.09501e-07	63.9764	83.6047	57.3575	286.23	179.688	223.782	174.611	ANXA13
gene132	234.205	1.3408	0.276745	4.84489	1.2668e-06	1.00841e-05	466.915	272.489	334.586	121.932	180.659	118.758	144.097	SMIM12
gene13210	1239.21	1.17938	0.238756	4.93969	7.82455e-07	6.67997e-06	1884.5	1819.69	1755.38	818.392	904.267	525.927	966.295	MCM4
gene13213	847.696	-1.1755	0.210027	-5.5969	2.18218e-08	3.10961e-07	469.16	511.949	498.294	949.624	997.511	1135.87	1371.46	UBE2V2
gene1322	232.322	1.28401	0.237411	5.40839	6.35943e-08	7.84605e-07	304.168	382.93	363.264	173.598	138.894	142.186	121.211	LOC101104627
gene13222	344.677	-1.41215	0.310602	-4.54648	5.45496e-06	3.55487e-05	151.523	268.361	109.935	446.396	393.371	436.253	606.901	SNTG1
gene1324	1372.32	1.28456	0.263461	4.87572	1.08413e-06	8.82375e-06	1487.17	2484.4	2235.75	1090.16	956.717	635.798	716.245	SHC1
gene13244	73.3002	-2.1334	0.451344	-4.72678	2.28108e-06	1.67051e-05	13.4687	45.4149	15.5343	82.6658	150.549	79.1718	126.296	XKR4
gene13250	466.301	-1.5792	0.322669	-4.89419	9.87122e-07	8.15449e-06	199.786	322.033	132.639	429.862	593.456	818.378	767.95	PLAG1
gene13263	688.545	-1.66299	0.275593	-6.03422	1.59735e-09	3.41434e-08	328.861	325.129	268.863	587.961	1276.27	910.476	1122.26	TOX
gene1327	2197.54	1.64031	0.212776	7.7091	1.26705e-14	1.40692e-12	3976.64	2899.33	3897.92	1366.05	1111.15	967.027	1164.64	ZBTB7B
gene13278	236.747	-1.06333	0.344874	-3.08325	0.00204751	0.00587064	130.198	236.364	70.502	257.297	322.467	318.303	322.098	NKAIN3
gene13294	239.861	-1.24561	0.26792	-4.64919	3.33235e-06	2.3249e-05	124.586	173.402	105.155	283.13	274.874	397.475	320.403	DNAJC5B
gene1330	2104.83	1.77571	0.280833	6.32302	2.56492e-10	7.17444e-09	4874.55	2382.22	3347.05	1149.06	1297.64	743.246	940.018	ADAM15
gene13301	464.814	-1.42216	0.284509	-4.99863	5.774e-07	5.13979e-06	200.908	311.711	198.361	724.359	608.996	796.565	412.794	ADHFE1
gene13306	5535.4	-1.21488	0.231895	-5.23892	1.61517e-07	1.74036e-06	2837.41	3269.87	3355.42	5834.14	5894.73	7886.48	9669.73	SGK3
gene13307	62.7569	-1.2811	0.383042	-3.34453	0.000824221	0.00268665	26.9374	54.7043	21.5091	79.5659	81.588	78.3639	96.6295	MCMDC2
gene13311	2976.21	-1.44827	0.254764	-5.68476	1.30995e-08	2.0126e-07	1745.32	1789.76	955.959	3351.07	3982.27	4778.58	4230.51	CSPP1
gene13313	19.7603	-2.37436	0.636255	-3.73177	0.000190139	0.000761448	5.61196	9.28941	2.3899	17.5665	40.794	35.5465	27.1241	CPA6
gene13315	1229.74	-1.20823	0.245808	-4.91535	8.86237e-07	7.447e-06	547.728	733.863	828.099	1186.25	2042.61	1578.59	1691.02	PREX2
gene13317	29.2759	-1.84024	0.522872	-3.51948	0.000432391	0.00154587	16.8359	10.3216	8.36464	22.7331	48.5643	38.778	59.3339	C9H8orf34
gene13318	529.871	-1.35944	0.301863	-4.50352	6.68375e-06	4.21742e-05	221.111	340.612	277.228	696.46	466.217	1095.48	611.987	SULF1
gene1332	2671.96	1.75643	0.284289	6.17833	6.47842e-10	1.57808e-08	6033.98	3551.65	3825.03	1315.42	1667.7	807.068	1502.84	EFNA3
gene13331	17.6666	2.62561	0.616327	4.26008	2.04351e-05	0.000111039	28.0598	49.5435	23.899	8.26658	3.88514	3.2315	6.78102	MSC
gene13333	207.606	1.00287	0.320554	3.12857	0.00175661	0.00515322	176.216	291.068	405.088	179.798	146.664	100.984	153.421	TRPA1
gene13336	52.0614	-1.85873	0.5718	-3.25066	0.00115138	0.00356806	33.6718	22.7074	5.97474	36.1663	59.2484	54.9355	151.725	KCNB2
gene13340	714.328	-1.68721	0.324834	-5.19406	2.05762e-07	2.13763e-06	344.574	458.277	141.004	991.99	954.774	1190	919.675	C9H8orf89
gene13341	657.451	-1.63899	0.336811	-4.8662	1.13765e-06	9.18933e-06	399.572	295.197	198.361	517.695	930.492	822.417	1438.42	RPL7
gene13343	3516.91	-1.25662	0.207805	-6.04712	1.47459e-09	3.18377e-08	2051.73	1831.05	1999.15	3763.36	4157.1	5335.21	5480.76	STAU2
gene13374	205.985	1.62218	0.375133	4.32428	1.53028e-05	8.65912e-05	379.369	232.235	394.333	72.3326	201.056	89.6742	72.8959	STMN2
gene13383	3034.47	-1.96348	0.291509	-6.73558	1.63274e-11	6.6318e-10	1431.05	1401.67	592.694	3578.4	4699.08	4805.24	4733.15	ZNF704
gene13385	1367.34	-1.33636	0.217768	-6.13665	8.42782e-10	1.98233e-08	570.175	826.757	794.641	2121.41	1809.51	1896.89	1552.01	PAG1
gene13389	19024.3	-1.09785	0.233116	-4.70945	2.48381e-06	1.80353e-05	14078.2	11717	8760.17	20326.5	25761.4	22076.8	30450.2	LOC101113339
gene1339	157	1.27132	0.277577	4.58005	4.64875e-06	3.10279e-05	218.867	254.943	234.21	83.6992	116.554	120.373	70.3531	THBS3
gene13394	522.457	-2.56333	0.248375	-10.3204	5.6988e-25	1.21812e-21	132.442	180.627	97.9858	759.492	734.292	889.471	862.884	COLEC10
gene13396	1819.36	-1.72327	0.179186	-9.61719	6.76534e-22	5.93791e-19	786.797	800.953	769.547	2555.41	2639.96	2867.15	2315.72	SAMD12
gene13398	8466.05	-1.49813	0.216114	-6.93211	4.14609e-12	2.09758e-10	4032.76	5246.45	3153.47	11793.3	11602	12678	10756.4	EXT1
gene1341	553.987	1.04	0.264992	3.92465	8.68576e-05	0.000388609	982.093	591.426	779.106	405.063	319.553	299.722	500.948	GBA
gene13410	10431.7	-1.85255	0.210303	-8.80893	1.26344e-18	5.02438e-16	4130.4	4669.47	3756.92	11601.1	18080.5	15245.4	15537.9	TRPS1
gene13415	50.0658	-2.27154	0.493073	-4.6069	4.08725e-06	2.78121e-05	23.5702	18.5788	4.77979	52.6995	61.191	73.5167	116.125	CSMD3
gene1342	512.549	1.14308	0.232415	4.91825	8.73228e-07	7.35214e-06	820.469	697.738	718.164	411.263	382.687	297.298	260.222	FAM189B
gene13426	1183.3	-1.00826	0.247568	-4.07268	4.6476e-05	0.000226486	975.359	662.644	611.814	1187.29	1453.04	1484.07	1908.86	ENY2
gene13427	855.462	-1.08961	0.255158	-4.27032	1.95189e-05	0.000106637	363.655	655.419	541.312	957.89	930.492	1189.19	1350.27	NUDCD1
gene1343	1016.26	1.18072	0.242606	4.86683	1.13404e-06	9.16882e-06	1830.62	1188.01	1460.23	668.56	791.598	483.11	691.664	SCAMP3
gene13432	3244.72	-1.0606	0.304696	-3.48083	0.000499871	0.00174995	2911.49	1722.67	1373	2856.1	4209.55	3700.07	5940.17	EMC2
gene13435	14651.6	-1.06203	0.291406	-3.64452	0.000267892	0.00102345	10860.3	7865.03	8380.17	11733.4	18058.1	16173.7	29490.6	EIF3E
gene13438	402.858	-1.27456	0.304433	-4.18665	2.83102e-05	0.000146966	208.765	229.139	229.43	364.763	759.546	357.889	670.473	ANGPT1
gene13444	15.0285	-3.47265	0.849683	-4.08699	4.37001e-05	0.000214487	5.61196	1.03216	0	16.5332	26.2247	20.1969	35.6003	ABRA
gene13448	514.282	-1.32239	0.284839	-4.64261	3.44039e-06	2.39052e-05	255.905	374.673	199.556	459.829	806.167	789.295	714.55	ZFPM2
gene13450	3911.84	-1.20634	0.209434	-5.75999	8.41191e-09	1.37204e-07	1822.77	2501.95	2392.29	4183.92	5682.02	5143.74	5656.22	LRP12
gene13454	83.7639	-1.82574	0.357141	-5.1121	3.18595e-07	3.07621e-06	34.7942	42.3184	25.0939	89.8991	110.727	112.295	171.221	RIMS2
gene1347	2203.17	1.14896	0.256131	4.48581	7.26362e-06	4.54474e-05	4496.3	2577.29	2557.19	1630.58	1546.29	1127.79	1486.74	FDPS
gene13485	24955	1.03224	0.24645	4.18844	2.80881e-05	0.000146079	36127.6	27368.7	42249.8	14930.5	18690.5	12993.9	22324	PABPC1
gene13495	488.224	-1.13554	0.333784	-3.40202	0.000668891	0.00224981	211.01	284.875	374.019	431.929	1015.97	681.039	418.728	RGS22
gene13497	6001.33	-1.12997	0.235863	-4.7908	1.66119e-06	1.27361e-05	3302.08	4362.92	3056.68	5518.98	8781.4	7976.96	9010.28	VPS13B
gene13504	197.383	1.23147	0.29864	4.1236	3.72998e-05	0.000186882	218.867	349.901	311.882	130.199	175.803	101.792	93.239	OSR2
gene13506	3051.19	-1.05089	0.219373	-4.79046	1.66403e-06	1.27486e-05	1767.77	2027.15	1882.04	2947.04	3811.33	3944.05	4978.96	STK3
gene13513	342.628	-1.07151	0.242422	-4.42002	9.86917e-06	5.92983e-05	243.559	237.396	149.369	453.629	431.251	483.11	400.08	RPL30
gene13523	6165.43	-1.00323	0.230266	-4.35682	1.31966e-05	7.61599e-05	3222.39	3798.33	4730.8	8555.91	6448.37	6670.63	9731.61	CPQ
gene13544	380.39	-1.0433	0.254622	-4.09746	4.17703e-05	0.00020602	180.705	277.65	252.134	371.996	515.753	467.76	596.73	CCNE2
gene13551	502.864	-1.35807	0.217008	-6.25815	3.89565e-10	1.01394e-08	260.395	297.261	238.99	556.961	675.044	714.97	776.426	RAD54B
gene13566	336.825	-1.24067	0.287931	-4.30891	1.64064e-05	9.17727e-05	147.033	184.756	236.6	317.23	483.7	376.47	611.987	TRIQK
gene13569	2885.37	-1.36237	0.272522	-4.99913	5.7589e-07	5.13169e-06	1499.52	1872.33	1188.97	2642.21	5390.64	4275.28	3328.63	RUNX1T1
gene1357	203.221	1.11383	0.23309	4.77855	1.76564e-06	1.34248e-05	291.822	286.939	301.127	135.365	160.262	113.103	133.925	MSTO1
gene13572	1141.5	-1.74866	0.252498	-6.92546	4.34563e-12	2.17282e-10	581.399	535.689	340.56	1510.72	1262.67	1837.92	1921.57	SLC26A7
gene13585	920.604	-1.26602	0.312394	-4.05265	5.06417e-05	0.000243087	474.772	494.403	562.821	705.76	1997.94	989.648	1218.89	MMP16
gene13588	17.405	-3.48324	0.809695	-4.30191	1.69331e-05	9.43484e-05	3.36718	4.12862	0	19.6331	31.0811	16.1575	47.4671	CNBD1
gene1359	402.662	-1.26393	0.285696	-4.42404	9.68739e-06	5.83907e-05	222.234	312.743	135.029	631.36	473.016	551.779	492.471	LOC101107157
gene13592	1212.05	-1.02934	0.276532	-3.72231	0.000197406	0.000785582	748.636	961.97	568.796	1876.51	1085.9	1973.64	1268.9	RMDN1
gene13593	2039.7	-1.70281	0.261588	-6.50953	7.53856e-11	2.44146e-09	838.427	1265.42	568.796	2865.4	2788.56	3167.68	2783.61	WWP1
gene13620	1579	-1.19251	0.225982	-5.27702	1.313e-07	1.45699e-06	822.714	1178.72	728.919	1995.35	1814.36	2201.46	2311.48	SNX16
gene13630	54.4005	-1.50281	0.408285	-3.68079	0.00023251	0.000904852	21.3255	41.2862	16.7293	75.4326	62.1623	97.753	66.1149	DEPTOR
gene13634	2013.82	-1.31388	0.247267	-5.31361	1.07477e-07	1.22036e-06	966.38	1378.96	921.305	3015.24	1987.25	3338.14	2489.48	MTBP
gene13645	2706.56	-1.37314	0.225973	-6.07657	1.22778e-09	2.71797e-08	1464.72	1667.96	1120.86	2828.2	3736.54	3847.1	4280.52	TDRD3
gene13649	1935.66	-1.13555	0.213022	-5.33066	9.78546e-08	1.13062e-06	1199.84	1206.59	1042	2058.38	2257.27	2642.56	3143	DIAPH3
gene13663	56.9868	-1.52966	0.455857	-3.35556	0.000792051	0.00259963	28.0598	45.4149	8.36464	71.2993	66.0474	85.6348	94.0866	LECT1
gene1367	6815.39	-1.08105	0.339912	-3.18037	0.00147089	0.00441654	6033.98	3037.64	3415.16	4508.39	8996.05	8175.7	13540.8	LOC100037664
gene13672	1418.16	-1.05609	0.306624	-3.44427	0.000572604	0.00196574	615.071	1339.74	676.341	1571.68	1366.6	2480.18	1877.49	NAA16
gene13674	3119.07	-1.10913	0.190374	-5.82607	5.67463e-09	9.88149e-08	1884.5	2056.06	1692.05	3592.86	3704.48	4391.61	4511.92	VWA8
gene13675	1832.57	-1.14149	0.245544	-4.64882	3.33841e-06	2.32817e-05	1131.37	1078.6	1044.39	3084.47	2054.27	1651.3	2783.61	DGKH
gene13683	1465.22	-1.09629	0.242135	-4.5276	5.96565e-06	3.8207e-05	1183	836.047	644.077	2082.15	2066.9	1627.06	1817.31	ENOX1
gene1370	2861.25	1.06647	0.254753	4.18629	2.83556e-05	0.000147067	5356.06	2931.32	3950.5	1756.65	2044.56	1552.74	2436.93	RAB25
gene1371	28.9175	1.46605	0.469588	3.122	0.0017963	0.00524842	29.1822	61.9294	45.408	12.3999	19.4257	13.7339	20.3431	MEX3A
gene13713	2704.93	-1.8824	0.246017	-7.6515	1.98642e-14	2.05866e-12	1006.79	1460.5	732.503	3702.4	3645.24	4104.01	4283.06	LRCH1
gene13718	377.399	-1.71599	0.339585	-5.05321	4.34448e-07	4.01137e-06	117.851	275.586	96.7908	646.86	428.337	588.134	488.233	MED4
gene1373	6872.63	1.83494	0.248797	7.37528	1.64005e-13	1.33547e-11	13483.3	9504.09	12031.9	3573.23	4102.71	2166.72	3246.41	LMNA
gene1374	922.519	1.31034	0.245587	5.33554	9.52602e-08	1.10587e-06	1527.58	1170.47	1500.86	707.826	658.532	468.568	423.814	SEMA4A
gene13742	132.977	-2.08132	0.358196	-5.81056	6.22632e-09	1.0679e-07	56.1196	60.8972	22.704	133.299	224.367	200.353	233.097	KCNRG
gene13748	3.60974	-4.93926	1.61792	-3.05284	0.00226688	0.00639453	0	0	0	9.29991	7.77029	5.65513	2.54288	DLEU7
gene13751	124.739	-1.24543	0.282156	-4.41396	1.01495e-05	6.08542e-05	57.242	86.7011	65.7222	145.699	168.032	195.506	154.268	FAM124A
gene13756	2727.42	-1.44476	0.251929	-5.73479	9.76314e-09	1.55882e-07	1409.72	1843.43	869.923	3761.3	3597.64	3998.18	3611.74	WDFY2
gene13768	99.7299	-1.36086	0.385625	-3.52896	0.000417193	0.00149748	39.2837	85.669	32.2636	111.599	193.286	113.103	122.906	LOC101107613
gene1377	283.54	1.03246	0.279858	3.68923	0.000224937	0.000878982	477.017	287.972	436.156	228.364	233.109	136.531	185.63	PAQR6
gene13773	2113.36	1.16987	0.202889	5.76605	8.11515e-09	1.32793e-07	3275.14	2871.46	3141.52	1598.55	1504.52	1305.53	1096.83	FOXO1
gene1379	1538.96	1.15769	0.216687	5.34271	9.15694e-08	1.06665e-06	2392.94	2297.58	2051.73	1303.02	865.416	1002.57	859.494	SMG5
gene13792	648.997	-1.02672	0.23382	-4.39108	1.12791e-05	6.64622e-05	478.139	418.023	326.221	670.627	776.057	865.235	1008.68	EXOSC8
gene1380	1908.29	1.0955	0.20825	5.26051	1.43653e-07	1.57063e-06	3152.8	2166.5	2906.11	1368.12	1338.43	1099.52	1326.54	TMEM79
gene13806	1474.27	-1.41678	0.292981	-4.83572	1.32662e-06	1.05024e-05	640.886	1058.99	562.821	1284.42	2660.35	2020.5	2091.94	NBEA
gene13819	2491.12	-1.61792	0.235336	-6.87493	6.20184e-12	2.96199e-10	1166.17	1461.53	795.836	3085.5	3582.1	3490.02	3856.7	STARD13
gene13825	3306.39	-1.21719	0.26428	-4.60567	4.1114e-06	2.79209e-05	1800.32	1964.19	1880.85	2730.04	4776.78	3878.61	6113.93	N4BP2L2
gene13828	815.737	-1.00714	0.253988	-3.96532	7.32972e-05	0.000334911	510.689	565.622	475.59	714.026	935.348	1104.37	1404.52	BRCA2
gene13829	491.465	-1.74347	0.278808	-6.25329	4.01905e-10	1.0413e-08	178.46	286.939	163.708	547.661	709.039	932.289	622.158	ZAR1L
gene13854	995.708	1.66319	0.240816	6.90645	4.96936e-12	2.43484e-10	1230.14	1766.02	1908.33	655.127	465.246	517.04	428.052	SLC7A1
gene13858	3042.53	-1.06027	0.297149	-3.56816	0.000359499	0.00132174	2720.68	1340.77	1572.55	2672.17	4007.53	3599.89	5384.13	POMP
gene1387	751.445	1.33572	0.228539	5.84458	5.07854e-09	9.02812e-08	1086.48	1071.38	1283.37	575.561	461.361	438.677	343.289	MEF2D
gene13873	472.191	-1.29567	0.322713	-4.01493	5.94639e-05	0.00027958	351.309	231.203	191.192	470.162	402.112	781.216	878.142	RPL21
gene13883	173.636	-1.05691	0.308432	-3.42672	0.000610923	0.00207731	85.3018	162.049	74.0868	247.998	192.315	236.708	216.993	LOC101115632
gene1391	843.139	1.12576	0.30588	3.68039	0.000232874	0.000906063	1570.23	1002.22	1090.99	426.762	753.718	340.116	717.94	APOA1BP
gene13914	2350.91	1.79874	0.339078	5.30481	1.12787e-07	1.27642e-06	2936.18	3726.08	5233.87	1596.48	1476.35	537.237	950.19	GJB2
gene13935	952.284	-1.40181	0.328008	-4.27372	1.92243e-05	0.000105398	380.491	608.972	483.954	993.023	2197.05	801.413	1201.09	PCDH9
gene13940	13.1184	-2.82699	0.934358	-3.0256	0.00248144	0.00690297	0	5.16078	3.58485	7.23326	14.5693	12.1181	49.1624	KLHL1
gene13941	15855.2	-2.04644	0.274594	-7.45259	9.15225e-14	8.02582e-12	5867.87	6794.68	4391.44	13599.6	27467	24791.3	28074.3	DACH1
gene13946	1258.71	-1.70887	0.264812	-6.45317	1.09538e-10	3.38715e-09	621.805	649.226	372.824	1278.22	1763.86	1937.29	2187.73	PIBF1
gene1395	652.57	1.01806	0.25802	3.94564	7.95856e-05	0.000360507	1051.68	797.857	904.576	410.229	630.365	322.342	450.938	NES
gene13953	3147.23	-1.68652	0.293067	-5.75471	8.6791e-09	1.40409e-07	1242.49	1971.42	948.789	2849.9	4945.79	5498.4	4573.8	KLF12
gene1396	1809.33	1.08916	0.219245	4.96778	6.7722e-07	5.88738e-06	2354.78	2602.07	2828.44	1242.05	1463.73	894.318	1279.92	CRABP2
gene13960	1995.75	-1.34337	0.242014	-5.55078	2.84397e-08	3.91246e-07	790.164	1334.58	1062.31	2034.61	2784.68	3048.92	2914.99	TBC1D4
gene13963	1825	-1.4117	0.260625	-5.41658	6.07515e-08	7.54978e-07	963.013	1152.92	693.07	2432.44	1797.85	3310.67	2425.06	UCHL3
gene13968	1192.82	-1.31476	0.307314	-4.27823	1.88388e-05	0.00010345	890.057	584.2	460.055	962.024	1680.32	1527.69	2245.36	LOC101103163
gene13981	1220.99	-1.09342	0.225688	-4.84482	1.26729e-06	1.00841e-05	705.985	752.442	764.767	1210.02	1448.19	1611.71	2053.8	RNF219
gene13983	5322.9	-1.20175	0.251376	-4.78069	1.74698e-06	1.32948e-05	3432.28	3259.55	2469.96	4692.32	7352.63	6883.91	9169.63	RBM26
gene14	5364.63	1.78093	0.238642	7.46278	8.47169e-14	7.5451e-12	8799.56	8293.38	9961.09	3327.3	3057.61	1878.31	2235.19	HDLBP
gene1400	1248.07	1.46865	0.234518	6.26241	3.79062e-10	9.91125e-09	2019.18	1744.34	2131.79	802.892	823.65	482.302	732.35	HDGF
gene14004	438.156	-2.74474	0.306567	-8.95313	3.45535e-19	1.64129e-16	125.708	132.116	50.1878	561.094	710.01	732.743	755.236	GPC5
gene14010	2316.26	-1.96078	0.336443	-5.82799	5.60977e-09	9.8085e-08	886.69	1323.22	408.672	2776.54	2719.6	4512.79	3586.31	GPC6
gene14053	760.297	-3.19356	0.652756	-4.89243	9.95968e-07	8.21566e-06	113.362	247.717	41.8232	1417.72	1440.42	1454.98	606.053	HS6ST3
gene14087	33.0007	-1.5156	0.478378	-3.1682	0.00153384	0.00458144	12.3463	15.4823	20.3141	24.7998	62.1623	49.2804	46.6195	NALCN
gene14104	7177.29	-1.09523	0.25784	-4.24771	2.15971e-05	0.000116318	4521	5472.49	3060.26	10270.2	7461.42	11764.3	7691.37	ARGLU1
gene14106	35.327	-1.92346	0.514045	-3.74181	0.000182698	0.000738042	20.2031	13.418	7.16969	26.8664	52.4494	50.8962	76.2864	FAM155A
gene14117	4227.06	1.33656	0.286406	4.66666	3.06138e-06	2.16231e-05	5797.16	5948.32	7618.99	3292.17	3446.12	1749.05	1737.64	COL4A1
gene14118	2671.47	1.14952	0.225805	5.09078	3.56588e-07	3.39136e-06	3306.57	3971.74	4401	2154.48	1958.11	1529.31	1379.09	LOC101115805
gene14138	186.604	1.50187	0.275842	5.44467	5.19025e-08	6.57954e-07	231.213	300.357	356.095	139.499	92.2722	96.9451	89.8485	MCF2L
gene14144	3380.5	1.31456	0.203111	6.47212	9.66405e-11	3.05462e-09	5486.25	4749.98	5168.15	2585.37	2037.76	1798.33	1837.66	CUL4A
gene14145	10486.8	1.59952	0.310809	5.14632	2.65651e-07	2.65031e-06	21820.4	11283.5	17874	5304.05	7603.23	3075.58	6447.05	LAMP1
gene14146	1444.58	1.14182	0.243309	4.69287	2.69398e-06	1.94048e-05	2745.37	1771.18	1786.45	1185.22	773.144	871.698	979.009	GRTP1
gene14159	2808.17	-2.1316	0.331303	-6.43397	1.24311e-10	3.78915e-09	1378.3	1089.96	403.893	4922.75	4411.58	3839.83	3610.89	CA10
gene14176	1171.54	-1.38832	0.247048	-5.61961	1.91394e-08	2.80209e-07	510.689	774.117	541.312	1235.85	1387.97	1858.92	1891.9	STXBP4
gene14212	468.972	1.57661	0.275048	5.73213	9.91798e-09	1.58207e-07	840.672	594.522	832.879	263.497	345.778	166.422	239.031	CUEDC1
gene14216	1648.79	1.23355	0.261503	4.71714	2.39181e-06	1.74562e-05	3005.77	1915.68	2443.67	906.224	1334.55	730.32	1205.33	DYNLL2
gene14232	147.145	1.18448	0.396184	2.98972	0.00279235	0.00762524	198.663	344.74	105.155	137.432	89.3583	95.3293	59.3339	BZRAP1
gene14235	297.329	-1.41245	0.270891	-5.21408	1.84734e-07	1.94637e-06	156.013	198.174	102.766	416.429	354.519	485.533	367.87	HSF5
gene14237	2015.61	1.22073	0.211689	5.76661	8.08822e-09	1.32479e-07	3550.13	2692.9	2731.65	1278.22	1342.32	1033.27	1480.8	2021-09-04
gene14239	325.545	-1.08231	0.24136	-4.48422	7.31811e-06	4.57215e-05	221.111	165.145	210.311	369.93	360.347	428.982	522.986	TEX14
gene14246	768.608	-1.14033	0.298774	-3.81671	0.000135241	0.000569753	355.798	698.77	310.687	944.457	820.737	960.564	1289.24	SKA2
gene14249	286.538	-1.17291	0.240411	-4.87877	1.06751e-06	8.70089e-06	181.828	158.952	160.123	278.997	414.739	414.44	396.69	GDPD1
gene14259	583.616	-1.03845	0.240633	-4.31551	1.59234e-05	8.95394e-05	410.796	294.165	388.358	604.494	675.044	752.94	959.514	TUBD1
gene14268	676.105	-1.47509	0.25451	-5.79579	6.80005e-09	1.14225e-07	306.413	409.766	289.178	697.493	827.536	977.53	1224.82	BRIP1
gene14274	3127.38	-1.7099	0.256228	-6.67337	2.50001e-11	9.45802e-10	1686.96	1425.41	970.298	3356.23	4636.92	5712.49	4103.36	BCAS3
gene14284	255.074	2.95769	0.298363	9.91304	3.65366e-23	5.20647e-20	642.008	405.637	475.59	94.0324	54.392	46.0489	67.8102	CA4
gene143	2014.29	-1.08106	0.205888	-5.25072	1.51505e-07	1.64282e-06	1057.29	1443.99	1188.97	2183.41	2518.54	2826.76	2881.08	ZMYM4
gene14309	27.0771	-3.14403	0.851829	-3.69091	0.000223451	0.000874175	7.85675	0	7.16969	15.4998	9.71286	49.2804	100.02	LOC101110777
gene14316	1028.84	1.02926	0.306871	3.35404	0.000796408	0.00261193	1750.93	1083.76	1521.17	613.794	1023.74	401.514	806.941	LOC101115044
gene14320	45.4176	-1.70752	0.492037	-3.47032	0.000519846	0.00181046	15.7135	37.1576	5.97474	72.3326	69.9326	54.9355	61.8768	HEATR9
gene14325	51.3277	1.19121	0.399973	2.97822	0.00289926	0.00787818	78.5675	68.1223	80.0616	21.6998	55.3633	26.6599	28.8193	RASL10B
gene14340	584.262	1.20189	0.206752	5.81317	6.13005e-09	1.05776e-07	913.627	796.825	878.287	455.695	336.065	364.352	344.984	LIG3
gene14343	13.7586	2.21661	0.668675	3.31493	0.000916669	0.0029387	32.5494	26.8361	15.5343	4.13329	5.82772	8.88663	2.54288	TMEM132E
gene14350	86.433	-2.07389	0.494	-4.19815	2.69105e-05	0.000140424	30.3046	54.7043	5.97474	82.6658	171.918	118.758	140.706	ASIC2
gene14356	4691.73	-1.54382	0.220553	-6.99977	2.5638e-12	1.39177e-10	2082.04	2548.39	2088.77	7825.35	4843.8	7179.59	6274.14	MYO1D
gene14379	247.584	1.33901	0.271331	4.93498	8.01588e-07	6.81284e-06	305.291	340.612	488.734	197.365	128.21	138.955	133.925	RAB11FIP4
gene14384	1478.42	-1.19632	0.258267	-4.6321	3.6197e-06	2.49785e-05	906.893	999.127	645.272	2539.91	1649.24	2167.53	1440.97	KSR1
gene14389	260.148	1.01462	0.209148	4.85119	1.22721e-06	9.79709e-06	352.431	356.094	388.358	185.998	192.315	172.078	173.764	LYRM9
gene1439	46.8859	-1.61264	0.456699	-3.53108	0.000413866	0.00148757	8.97914	24.7717	31.0687	42.3662	63.1336	81.5954	76.2864	LOC443423
gene14394	623.345	1.20525	0.240286	5.0159	5.27866e-07	4.78099e-06	766.594	835.014	1162.68	507.362	377.83	357.081	356.851	TNFAIP1
gene14395	1501.41	1.35401	0.254366	5.32306	1.02034e-07	1.17336e-06	2858.73	1760.86	2287.13	913.457	1080.07	621.256	988.333	POLDIP2
gene14402	5251.6	1.82559	0.185294	9.85239	6.693e-23	8.17503e-20	9357.39	7517.19	9838.01	2690.77	2523.4	2506.84	2327.58	FOXN1
gene14404	1211.78	1.08881	0.202657	5.37265	7.75891e-08	9.26517e-07	1920.41	1569.91	1723.12	866.958	928.549	664.882	808.636	PIGS
gene14405	180.634	1.53891	0.398765	3.85918	0.000113769	0.000491397	374.879	201.27	290.373	88.8658	137.923	36.3544	134.773	ALDOC
gene14409	1331.58	1.13745	0.247312	4.59927	4.23977e-06	2.86675e-05	1483.8	2177.85	2141.35	1193.49	739.149	836.151	749.302	KIAA0100
gene14411	2784.97	1.26798	0.211773	5.98748	2.13123e-09	4.32313e-08	4398.66	3909.81	4238.48	2154.48	1757.06	1703.81	1332.47	SUPT6H
gene14419	392.477	1.36742	0.23521	5.81362	6.11358e-09	1.05598e-07	698.128	522.271	590.305	251.097	284.587	189.043	211.907	ERAL1
gene14433	392.321	1.18697	0.269836	4.39885	1.08827e-05	6.45711e-05	775.573	437.634	518.608	228.364	321.496	205.2	259.374	TP53I13
gene14434	688.004	1.51706	0.226248	6.70529	2.01001e-11	7.86524e-10	1074.13	1077.57	1132.81	512.528	358.404	321.535	339.051	GIT1
gene14437	2528.25	-1.1616	0.214771	-5.40855	6.35382e-08	7.84478e-07	1212.18	1872.33	1358.66	3192.97	2953.68	3451.25	3656.66	SSH2
gene14441	361.869	-1.46426	0.375825	-3.89612	9.77455e-05	0.000430231	176.216	248.75	115.91	557.994	532.265	205.2	696.75	EFCAB5
gene14442	4016.91	-1.41914	0.243421	-5.82996	5.54391e-09	9.70325e-08	2545.59	2064.31	1548.65	3977.26	5905.42	5715.72	6361.44	NSRP1
gene14448	3606.43	-1.02336	0.218715	-4.67896	2.88334e-06	2.05181e-05	2733.03	2012.7	2058.9	3662.1	4344.56	5041.95	5391.76	GOSR1
gene14472	2253.11	1.73072	0.23622	7.32671	2.35871e-13	1.83336e-11	3636.55	3676.54	3937.36	1528.28	1186.91	967.835	838.303	MYO1C
gene14477	45.019	1.42379	0.418075	3.40557	0.000660256	0.00222383	87.5466	52.64	70.502	15.4998	33.995	20.1969	34.7527	RILP
gene14478	3639.4	1.48235	0.239146	6.19852	5.6995e-10	1.40232e-08	4445.8	5968.96	6830.33	2690.77	2059.13	1765.21	1715.6	PRPF8
gene14481	352.146	1.47731	0.249371	5.92414	3.13937e-09	5.94498e-08	609.459	475.824	580.745	240.764	235.051	150.265	172.916	WDR81
gene14482	32.3967	2.3088	0.434745	5.31069	1.09212e-07	1.23677e-06	50.5077	74.3152	53.7727	11.3666	13.598	10.5024	12.7144	SERPINF2
gene14483	2044.21	1.50688	0.388417	3.87955	0.00010465	0.000457208	2937.3	2012.7	4789.35	1210.02	2027.07	575.208	757.779	SERPINF1
gene14490	149.056	1.45967	0.328326	4.4458	8.7564e-06	5.33813e-05	305.291	186.82	210.311	72.3326	128.21	57.3592	83.0675	HIC1
gene14502	952.815	1.85926	0.254486	7.30595	2.75323e-13	2.09324e-11	1630.84	1515.21	1730.29	653.06	409.883	400.706	329.727	CLUH
gene14530	243.96	-1.01049	0.276553	-3.65389	0.000258301	0.000992128	189.684	127.987	145.784	228.364	411.825	315.879	288.193	ASPA
gene14535	2417.03	1.08589	0.267335	4.06191	4.86724e-05	0.000235113	3957.56	2946.81	3486.86	1717.38	2104.78	960.564	1745.26	TAX1BP3
gene14537	250.077	1.03006	0.248764	4.14072	3.46211e-05	0.000174947	294.067	382.93	382.384	150.865	179.688	216.511	144.097	P2RX5
gene14544	139.967	1.28733	0.291095	4.42239	9.76159e-06	5.87137e-05	140.299	228.107	265.279	94.0324	76.7316	88.8663	86.458	ATP2A3
gene14547	358.112	1.45933	0.286704	5.09003	3.58003e-07	3.39989e-06	688.027	426.281	573.575	209.765	245.735	125.221	238.183	LOC101102403
gene14552	1400.18	1.00002	0.237893	4.20365	2.62648e-05	0.000137516	2227.95	1958	1694.44	1281.32	733.321	1035.7	870.513	SPNS2
gene14553	1375.19	1.72263	0.236712	7.27732	3.40511e-13	2.5098e-11	2463.65	2203.65	2187.95	960.99	648.819	534.006	627.244	MYBBP1A
gene14554	1292.76	1.88204	0.313924	5.9952	2.03236e-09	4.1529e-08	3098.93	1442.95	2103.11	647.893	730.407	336.884	689.121	GGT6
gene14592	5141.98	1.81687	0.244678	7.42556	1.12301e-13	9.60177e-12	9258.62	7006.28	9846.38	2764.14	2758.45	1623.83	2736.14	KIF1C
gene14598	5313.1	1.23613	0.325827	3.79384	0.000148338	0.000617022	10544.9	5796.59	7407.49	2931.54	5075.94	1751.47	3683.79	PFN1
gene14599	1680.47	1.11473	0.218363	5.10494	3.30896e-07	3.17527e-06	3012.5	2004.45	2263.23	1189.35	1283.07	979.145	1031.56	RNF167
gene14600	1199.41	1.30123	0.252733	5.14862	2.62414e-07	2.62261e-06	2050.61	1576.1	1821.1	688.193	947.975	487.149	824.741	SLC25A11
gene14601	220.825	1.51771	0.31248	4.85696	1.19201e-06	9.57867e-06	475.894	360.223	218.676	106.432	111.698	105.024	167.83	GP1BA
gene14604	587.65	1.01971	0.305088	3.34237	0.000830672	0.0027051	1183	570.782	727.724	350.296	535.179	279.525	467.043	CHRNE
gene14620	3930.69	1.02096	0.252882	4.0373	5.4071e-05	0.000257624	5756.75	3695.12	7152.96	3329.37	2343.71	2750.01	2486.94	LOC101113251
gene14623	2559.85	1.25903	0.323013	3.89778	9.70776e-05	0.000427842	5471.66	2346.09	3690	1387.75	2224.24	975.106	1824.09	RNASEK
gene14627	629.755	1.41443	0.224203	6.30871	2.81363e-10	7.77271e-09	1148.21	910.362	879.482	350.296	441.935	294.875	383.127	SLC16A13
gene14628	982.336	1.74844	0.336763	5.19191	2.08151e-07	2.15851e-06	2483.85	948.552	1490.1	443.296	716.809	319.919	473.824	SLC16A11
gene14634	3547.6	1.37319	0.288287	4.76328	1.90472e-06	1.43168e-05	7581.76	3584.68	5227.9	2088.35	2664.24	1413.78	2272.49	ACADVL
gene14635	472.933	1.41502	0.203373	6.95778	3.45675e-12	1.79123e-10	699.25	748.313	758.792	297.597	310.811	243.171	252.593	DVL2
gene14640	45.6078	2.10305	0.551386	3.81412	0.000136668	0.000574491	101.015	73.2831	69.307	4.13329	39.8227	10.5024	21.1907	CLDN7
gene14641	84.4216	1.35575	0.320362	4.23194	2.31688e-05	0.0001235	135.809	109.409	143.394	37.1996	68.9613	43.6253	52.5529	SLC2A4
gene14643	921.965	1.5649	0.303573	5.15493	2.53723e-07	2.55516e-06	1700.42	1191.11	1557.02	488.762	598.312	255.289	662.844	EIF5A
gene14644	1236.91	1.14755	0.263223	4.35963	1.30285e-05	7.53425e-05	2502.94	1366.57	1535.51	756.392	1007.22	645.493	844.237	GPS2
gene14648	672.932	1.70066	0.229437	7.41234	1.24093e-13	1.05049e-11	1181.88	903.137	1254.7	391.629	384.629	268.215	326.336	KCTD11
gene14650	555.616	1.0014	0.214687	4.66445	3.09436e-06	2.182e-05	820.469	853.593	659.612	461.895	385.601	336.884	371.261	TNK1
gene14651	1019.66	1.04751	0.237759	4.40577	1.0541e-05	6.29149e-05	1557.88	1352.12	1427.96	783.259	909.124	563.089	544.177	PLSCR3
gene14653	258.941	1.11842	0.326842	3.42191	0.000621834	0.00210865	230.09	477.888	414.647	227.331	150.549	203.585	108.496	NLGN2
gene14657	265.133	1.24804	0.295769	4.21963	2.44702e-05	0.000129228	537.626	275.586	375.214	157.065	224.367	129.26	156.811	LOC101121359
gene14662	1669.31	1.7552	0.293402	5.98224	2.20093e-09	4.43271e-08	2243.66	3019.06	3112.84	1186.25	947.975	694.773	480.605	POLR2A
gene14663	321.973	1.21321	0.280036	4.33234	1.47536e-05	8.38995e-05	499.465	383.962	547.286	175.665	296.242	149.457	201.735	TNFSF12
gene14664	55.8636	1.40088	0.388231	3.60836	0.000308144	0.00115402	69.5883	114.569	75.2818	38.2329	40.794	33.9308	18.6478	TNFSF13
gene14668	836.142	1.04688	0.236269	4.43088	9.38495e-06	5.67277e-05	1488.29	938.23	1130.42	612.76	644.934	447.563	590.796	MPDU1
gene14673	223.008	1.67412	0.366838	4.56363	5.02762e-06	3.32068e-05	231.213	361.255	507.853	160.165	154.434	79.1718	66.9625	ATP1B2
gene14674	2191.77	1.30473	0.234313	5.56831	2.57225e-08	3.58772e-07	3616.35	2957.13	3390.07	1567.55	1553.09	909.668	1348.57	TP53
gene14678	1170.62	1.26463	0.252636	5.00576	5.56427e-07	4.9947e-06	1786.85	1695.83	1786.45	1005.42	698.355	740.822	480.605	KDM6B
gene14682	3347.62	1.57945	0.212255	7.44128	9.97106e-14	8.65508e-12	5391.97	5302.19	5508.71	2119.35	2128.09	1511.54	1471.48	CHD3
gene14685	716.139	1.26076	0.294387	4.28267	1.84666e-05	0.000101602	1436.66	713.22	1070.67	431.929	587.628	296.49	476.366	TRAPPC1
gene14688	2099.59	1.17863	0.233368	5.05053	4.40588e-07	4.0593e-06	3327.89	2110.76	3810.69	1351.59	1461.79	1240.9	1393.5	ALOX15B
gene14691	328.41	1.13452	0.27956	4.05823	4.94455e-05	0.000238443	604.97	310.679	515.023	178.765	230.195	193.082	266.155	ALOX12B
gene14710	344.869	1.4694	0.29384	5.00067	5.71306e-07	5.0935e-06	646.498	412.862	569.99	176.698	241.85	120.373	245.812	BORCS6
gene14711	319.281	1.02941	0.226444	4.54596	5.46843e-06	3.56229e-05	500.587	476.856	374.019	235.598	220.482	185.004	242.421	AURKB
gene14722	252.519	1.31224	0.273095	4.80507	1.54699e-06	1.19808e-05	455.691	318.936	375.214	144.665	195.228	105.832	172.068	RANGRF
gene14723	880.643	2.9135	0.342291	8.51176	1.71308e-17	4.72479e-15	1838.48	1796.98	1601.23	215.964	420.567	126.836	164.44	SLC25A35
gene14724	251.262	1.31317	0.238644	5.50262	3.74186e-08	4.93718e-07	415.285	372.608	356.095	176.698	174.831	143.802	119.515	ARHGEF15
gene14727	298.723	-1.13763	0.299294	-3.80104	0.00014409	0.000601402	214.377	218.817	97.9858	385.429	312.754	454.834	406.861	RPL26
gene1474	782.72	-1.61057	0.415426	-3.87691	0.00010579	0.000461601	233.458	511.949	334.586	631.36	2287.38	733.551	746.76	IFI16
gene14752	9.26996	3.60782	0.921094	3.91688	8.97008e-05	0.000399449	17.9583	8.25725	32.2636	1.03332	2.91386	1.61575	0.847627	LOC443471
gene14759	54.7679	1.32249	0.372543	3.5499	0.000385374	0.0014018	84.1794	95.9905	69.307	41.3329	43.7079	23.4284	25.4288	PIRT
gene14769	997.22	1.63354	0.248752	6.56695	5.13563e-11	1.75288e-09	1636.45	1210.72	2035	609.661	513.81	393.435	581.472	ELAC2
gene1477	91.2593	1.40643	0.405938	3.46463	0.000530956	0.00184277	125.708	148.63	150.564	27.8997	101.014	46.8568	38.1432	CADM3
gene148	602.812	1.50039	0.291293	5.1508	2.59383e-07	2.60144e-06	1456.87	699.802	710.994	371.996	389.486	298.106	292.431	NCDN
gene14802	49.122	1.66251	0.412949	4.02595	5.67469e-05	0.000268652	93.1586	47.4792	101.571	16.5332	33.0237	26.6599	25.4288	ALDH3A1
gene14810	2270.76	1.37915	0.307493	4.48515	7.28643e-06	4.55568e-05	4201.11	2515.36	3791.57	1389.82	2041.64	786.063	1169.73	MFAP4
gene14811	557.807	1.15886	0.22451	5.16171	2.44709e-07	2.48046e-06	909.138	753.474	781.496	400.929	437.079	336.884	285.65	MAPK7
gene14815	2218.14	1.37614	0.206959	6.64935	2.94388e-11	1.08179e-09	3675.84	3016.99	3564.53	1638.85	1163.6	1159.3	1307.89	SLC5A10
gene14818	599.84	1.41063	0.27188	5.18843	2.12071e-07	2.18986e-06	987.705	748.313	1059.92	363.73	449.705	215.703	373.804	SHMT1
gene14819	577.992	1.54097	0.247553	6.22479	4.82201e-10	1.21259e-08	790.164	855.658	1128.03	413.329	332.18	271.446	255.136	SMCR8
gene14821	226.104	1.61311	0.28815	5.59814	2.1666e-08	3.09773e-07	457.936	272.489	371.629	109.532	159.291	87.2506	124.601	MIEF2
gene14822	2300.89	1.64812	0.205519	8.0193	1.06349e-15	1.73867e-13	3693.79	3591.9	4012.64	1464.22	1277.24	983.993	1082.42	FLII
gene14823	1311.32	1.52403	0.21066	7.23451	4.67202e-13	3.3013e-11	1979.9	1955.94	2334.93	895.891	752.747	631.759	628.092	LLGL1
gene14824	1819.71	1.10669	0.21659	5.10962	3.2281e-07	3.11164e-06	2948.52	2244.94	2673.1	1338.15	1363.69	920.17	1249.4	ALKBH5
gene14826	620.922	1.17712	0.247172	4.76234	1.91364e-06	1.43523e-05	1227.9	763.796	742.063	449.495	441.935	345.771	375.499	DRG2
gene14827	726.512	1.04425	0.188865	5.52906	3.21949e-08	4.32469e-07	1076.37	980.548	1031.24	546.628	520.609	441.1	489.081	GID4
gene14831	2581.65	1.71559	0.227607	7.53748	4.79141e-14	4.47722e-12	4689.36	3519.65	4643.57	1567.55	1494.81	1114.06	1042.58	SREBF1
gene14835	85.9216	1.00603	0.324981	3.09567	0.00196372	0.00566935	105.505	88.7654	167.293	61.9994	65.0762	50.0883	62.7244	RASD1
gene14836	355.959	1.32384	0.288375	4.59069	4.41781e-06	2.96835e-05	597.113	451.052	577.16	236.631	259.333	120.373	250.05	MED9
gene14844	2026.34	1.60661	0.280396	5.72979	1.00557e-08	1.59779e-07	2278.46	3224.46	4361.56	1495.22	1030.53	780.408	1013.76	USP22
gene14848	1320.42	2.06991	0.256091	8.0827	6.33495e-16	1.08194e-13	2639.87	1857.88	2516.56	677.86	629.393	361.12	560.282	NATD1
gene14850	1926.12	1.44908	0.213493	6.78746	1.14122e-11	4.91556e-10	3446.87	2445.18	3166.61	1190.39	1154.86	884.624	1194.31	MAP2K3
gene14855	2848.02	-1.12783	0.18937	-5.95569	2.58976e-09	5.07273e-08	1633.08	1839.3	1621.55	3354.17	3305.29	3931.93	4250.85	MBTD1
gene14866	7932.99	-1.10469	0.25859	-4.27197	1.93758e-05	0.000106092	6736.6	4465.11	3157.05	8841.11	10089.7	11308.6	10932.7	LUC7L3
gene14871	291.366	1.2864	0.277216	4.64043	3.47686e-06	2.41292e-05	557.829	377.769	382.384	212.865	227.281	137.339	144.097	SPATA20
gene14872	593.807	1.76153	0.231688	7.60304	2.89264e-14	2.84277e-12	1114.54	752.442	1116.08	351.33	282.644	264.983	274.631	EPN3
gene14875	1519.32	1.2866	0.269305	4.77749	1.77499e-06	1.34818e-05	3021.48	1666.93	2187.95	907.258	1243.25	681.039	927.304	ACSF2
gene14877	1295.76	1.55103	0.27371	5.6667	1.45577e-08	2.20688e-07	1794.71	2179.91	2258.45	813.225	829.478	391.82	802.703	LRRC59
gene14884	51379.6	2.69515	0.879346	3.06495	0.0021771	0.00618613	62194	55348.3	180710	21107.7	31081.1	5648.67	3567.66	COL1A1
gene14887	2550.65	1.35697	0.233278	5.81697	5.99252e-09	1.03612e-07	4727.52	3358.64	3655.35	1708.08	1843.5	1138.3	1423.17	PPP1R9B
gene14889	420.373	1.17851	0.269282	4.3765	1.206e-05	7.03361e-05	712.719	525.368	613.009	296.564	372.003	189.851	233.097	PDK2
gene14890	869.17	1.19551	0.2384	5.01474	5.3106e-07	4.80737e-06	1006.79	1437.79	1400.48	712.993	461.361	582.478	482.3	ITGA3
gene14891	5709.58	1.86714	0.192306	9.70921	2.75455e-22	2.61682e-19	10422.5	8488.45	10357.8	3030.74	2727.37	2270.13	2670.03	DLX3
gene14892	734.231	1.02234	0.201334	5.07782	3.81799e-07	3.5991e-06	1071.88	910.362	1120.86	458.795	552.662	459.681	565.367	DLX4
gene14895	14.4467	-2.05203	0.656705	-3.12473	0.0017797	0.00520664	6.73435	5.16078	3.58485	19.6331	15.5406	25.0441	25.4288	TAC4
gene14902	164.935	1.87388	0.431065	4.3471	1.37948e-05	7.91581e-05	205.398	242.557	397.918	104.366	124.325	28.2757	51.7053	NGFR
gene14931	152.29	1.02237	0.277467	3.68467	0.000229001	0.000893024	266.007	182.692	194.777	91.9657	134.037	88.0585	108.496	HOXB2
gene14937	3884.24	1.61818	0.230742	7.01293	2.33383e-12	1.28737e-10	6376.31	5051.37	7528.18	2382.84	2181.51	1513.96	2155.52	NFE2L1
gene14940	681.261	1.13177	0.254786	4.44203	8.91153e-06	5.4269e-05	1226.77	886.622	850.803	487.728	541.978	306.185	468.738	CDK5RAP3
gene14941	65.9701	1.40672	0.385043	3.6534	0.000258792	0.000993381	125.708	68.1223	113.52	25.8331	56.3346	29.8914	42.3814	PRR15L
gene14942	59.7353	1.22315	0.327499	3.73481	0.000187857	0.000753544	81.9346	83.6047	100.376	41.3329	44.6792	32.315	33.9051	PNPO
gene1495	12990.7	2.96312	0.319506	9.27407	1.79169e-20	1.09421e-17	32339.5	17577.6	27739.5	2931.54	5246.89	1912.24	3187.93	VSIG8
gene14965	56.7519	1.71053	0.401808	4.25708	2.07113e-05	0.000112219	85.3018	63.9937	132.639	39.2663	32.0524	18.5811	25.4288	C11H17orf96
gene14967	1941.96	1.00409	0.192258	5.22262	1.76405e-07	1.87946e-06	2615.17	2954.03	2595.43	1586.15	1383.11	1291.79	1168.03	MLLT6
gene1497	8198.91	1.1897	0.278739	4.26814	1.97106e-05	0.000107581	15731.5	8877.58	11611.3	4621.02	6992.29	3514.26	6044.43	TAGLN2
gene14978	236.118	-1.2129	0.302818	-4.00539	6.1915e-05	0.000289909	176.216	147.598	80.0616	260.397	263.218	383.741	341.594	RPL23
gene14982	3010.09	1.09884	0.246394	4.45967	8.20875e-06	5.05654e-05	3801.54	3971.74	5212.37	2397.31	2354.4	1353.19	1980.06	LASP1
gene14991	89.5011	1.35075	0.34781	3.88358	0.000102928	0.000450146	177.338	139.341	94.4009	48.5662	77.7029	48.4725	40.6861	STAC2
gene14993	2006.44	-1.0092	0.22154	-4.55537	5.22937e-06	3.42614e-05	1323.3	1468.76	1020.49	2035.65	2462.21	2729	3005.69	FBXL20
gene15	90.9017	1.56457	0.336241	4.65314	3.26925e-06	2.28928e-05	178.46	142.438	118.3	36.1663	35.9376	60.5907	64.4197	ANO7
gene15000	126.127	1.17744	0.26936	4.37126	1.23533e-05	7.19243e-05	226.723	149.663	179.242	79.5659	78.6742	79.1718	89.8485	TCAP
gene15002	359.118	1.32464	0.223704	5.9214	3.19207e-09	6.03143e-08	625.173	483.049	531.752	261.431	216.597	189.851	205.973	PGAP3
gene15003	2975.7	1.50499	0.205051	7.33957	2.14285e-13	1.69938e-11	4898.12	4315.45	4957.84	2094.55	1522.98	1418.63	1622.36	ERBB2
gene15012	1137.34	1.32829	0.260047	5.10789	3.25782e-07	3.13322e-06	1857.56	1431.6	1910.72	706.793	791.598	427.366	835.76	ORMDL3
gene15015	5457.95	1.3418	0.266473	5.03539	4.76877e-07	4.36415e-06	9550.44	6183.65	9301.48	3728.23	3360.65	2060.08	4021.14	GSDMA
gene15016	3224.93	1.63031	0.23901	6.82109	9.03552e-12	4.10127e-10	6045.21	4394.92	5337.84	1944.71	1970.74	1153.65	1727.46	PSMD3
gene1502	37.6492	-1.30635	0.425257	-3.07192	0.00212689	0.00606973	15.7135	30.9647	14.3394	50.6328	48.5643	53.3198	50.01	KCNJ10
gene15020	1549.7	1.48745	0.222019	6.69965	2.08923e-11	8.12766e-10	2423.25	2295.52	2632.47	1032.29	882.899	623.68	957.819	THRA
gene15021	1025.26	1.01365	0.255603	3.96571	7.3177e-05	0.000334669	1943.98	1057.96	1320.42	646.86	848.904	586.518	772.188	NR1D1
gene15031	1626.25	1.63297	0.261713	6.23953	4.38886e-10	1.12463e-08	2202.13	2873.52	2884.61	997.157	1074.24	531.582	820.503	IGFBP4
gene15042	21140	1.99155	0.310233	6.41953	1.36698e-10	4.12991e-09	41526.3	25053.5	44243	7787.12	9074.72	5768.23	14527.5	KRT10
gene15048	965.85	1.0724	0.209215	5.12584	2.96214e-07	2.89941e-06	1289.63	1237.56	1610.79	568.328	715.838	594.597	744.217	KRT40
gene15049	24947.8	2.45048	0.646477	3.79052	0.000150331	0.00062425	41104.3	36101.7	63182.9	6866.43	17628.8	4922.39	4828.08	BIIIB4
gene15050	16434.9	1.98466	0.358683	5.53318	3.14471e-08	4.23088e-07	24674.7	20269.5	41108.6	6142.07	13212.4	4762.43	4874.7	LOC101111893
gene15051	49533	2.27986	0.32707	6.97055	3.15697e-12	1.66105e-10	71781.5	82842.9	117416	14025.3	32734.3	15545.1	12386.4	LOC101112404
gene15052	10161	1.68703	0.346221	4.87269	1.10086e-06	8.93862e-06	14459.8	13811.3	22027.7	3386.2	9495.29	4574.19	3372.71	LOC101113159
gene15053	21497.5	1.97563	0.661191	2.98799	0.00280823	0.0076637	35319.4	23742.7	53321	6799.26	19551	5990.4	5758.78	KRTAP1-1
gene15054	11067.8	2.81337	0.610189	4.61064	4.01422e-06	2.73588e-05	20124.5	17523.9	27473.1	2011.88	6827.17	1870.23	1643.55	LOC106991399
gene15055	2496.69	1.89175	0.311864	6.06595	1.31172e-09	2.87202e-08	4917.2	3171.82	4767.84	847.325	1936.74	828.073	1007.83	LOC105610157
gene15056	21573.7	2.77519	0.73649	3.76813	0.000164472	0.000674617	37004.2	28265.6	61127.6	4406.09	13469.8	3688.76	3054	LOC101112657
gene1506	82.3644	1.13492	0.343173	3.30713	0.000942561	0.00300663	114.484	98.0548	145.784	72.3326	60.2197	33.1229	52.5529	ATP1A2
gene15062	3272.5	1.90979	0.380528	5.0188	5.19959e-07	4.71937e-06	5880.21	3294.64	7732.51	1435.29	2745.83	946.83	872.208	LOC101113420
gene15063	1501.63	2.76892	0.839809	3.29708	0.000976943	0.00310112	2937.3	1477.02	4377.1	308.964	1086.87	147.033	177.154	LOC101114537
gene15065	7255	3.58552	1.18702	3.0206	0.00252271	0.00699687	8971.28	10974.9	25761.9	1146.99	3641.35	215.703	72.8959	LOC101115634
gene15066	6701.27	2.62167	0.696846	3.76219	0.000168431	0.000689161	8990.36	9371.98	20193.4	2628.77	3940.51	852.309	931.542	LOC101116068
gene15067	297.049	2.39583	0.450669	5.31617	1.05977e-07	1.20894e-06	505.077	535.689	617.788	68.1993	225.338	32.315	94.9342	LOC105611408
gene15068	6595.71	2.98534	0.327901	9.10438	8.67617e-20	4.3636e-17	11806.4	10925.4	16784.2	1234.82	2940.08	1091.44	1387.57	LOC101107617
gene15069	33239.9	1.69156	0.280596	6.02846	1.65533e-09	3.50759e-08	59381.3	38115.5	67197.9	14697	24921.3	12478.4	15887.9	K33
gene15070	22872.6	2.1978	0.374704	5.86543	4.47983e-09	8.14947e-08	50706.3	22193.4	51154.6	7981.39	16343.8	5401.46	6327.54	LOC100526782
gene15071	21685.8	1.50469	0.285422	5.2718	1.35093e-07	1.49423e-06	35245.4	23328.8	44700.6	8367.85	17128.6	12072.9	10956.4	KRT34
gene15072	33001.5	1.51434	0.340152	4.45196	8.5089e-06	5.20766e-05	76587.6	31565.4	49346.6	11531.9	24461.8	12819.4	24698.2	V15
gene15074	3919.58	1.14371	0.235517	4.85618	1.19673e-06	9.60755e-06	7266.37	3965.54	5879.15	2813.74	2684.63	2231.35	2596.28	KRT32
gene15075	15737.8	2.20361	0.265377	8.30367	1.00942e-16	2.18495e-14	35292.5	20741.2	29400.5	7044.16	7484.73	4018.37	6183.44	KRT35
gene15078	11759.6	1.25386	0.334177	3.75208	0.000175375	0.00071216	25063	10644.6	17090.2	5846.54	10052.8	4282.55	9337.46	KRT15
gene15079	3242.37	1.26118	0.35423	3.56036	0.00037035	0.00135494	8038.57	3580.55	2964.67	1528.28	3044.98	1398.43	2141.11	LOC101117946
gene15081	73876.9	1.32502	0.365238	3.62782	0.000285826	0.00108301	153498	76028.6	107988	41705.9	69815.1	18209.5	49893	LOC101118459
gene15083	57941.4	1.60865	0.34159	4.70931	2.48552e-06	1.80401e-05	137256	59127.1	85823.6	29442.5	42573.4	15383.6	35983.5	KRT17
gene15085	8967.14	1.07111	0.258495	4.14362	3.41861e-05	0.000173056	15276.9	9953.08	13170.7	5579.94	7020.45	4073.31	7695.61	EIF1
gene15088	17281.8	1.79525	0.22214	8.08164	6.39041e-16	1.08194e-13	28890.4	24899.7	33606.7	10399.4	9175.74	6812.01	7188.73	JUP
gene15090	800.878	1.36774	0.298371	4.58403	4.56101e-06	3.05019e-05	995.562	1208.65	1491.3	584.861	672.13	324.766	328.879	FKBP10
gene15097	756.792	1.36316	0.325651	4.18596	2.83962e-05	0.000147214	1286.26	1044.54	1157.91	351.33	749.833	243.171	464.5	CNP
gene15099	914.972	1.22437	0.238451	5.1347	2.82594e-07	2.79004e-06	1470.33	1191.11	1416.01	559.028	724.579	407.169	636.568	NKIRAS2
gene15103	602.656	1.42442	0.237104	6.00758	1.88313e-09	3.89377e-08	837.305	1082.73	897.406	462.929	347.72	298.914	291.584	KAT2A
gene15105	1151.93	1.34137	0.289462	4.634	3.58661e-06	2.47824e-05	1707.16	1526.56	2049.34	669.593	919.808	375.662	815.417	RAB5C
gene15113	2387.91	1.8087	0.294762	6.13612	8.45604e-10	1.98293e-08	3366.05	3517.59	5223.12	1210.02	1546.29	632.567	1219.74	PTRF
gene15118	438.652	1.14081	0.253678	4.49708	6.88924e-06	4.33429e-05	814.857	515.046	583.135	356.496	279.73	223.782	297.517	COASY
gene15123	289.276	1.14883	0.278262	4.1286	3.64979e-05	0.000183239	489.363	330.29	444.521	181.865	266.132	138.147	174.611	LOC101103906
gene15129	118.674	1.07334	0.331114	3.24161	0.00118855	0.00366797	93.1586	201.27	213.896	89.8991	85.4732	78.3639	68.6578	CNTNAP1
gene1513	2102.2	1.00805	0.196026	5.14242	2.71223e-07	2.69333e-06	2900.26	2950.93	2996.93	1778.35	1472.47	1382.28	1234.15	NCSTN
gene15131	1106.75	1.18925	0.295427	4.02553	5.68473e-05	0.000268978	2153.87	1256.13	1478.15	759.492	1000.42	434.637	664.54	RAMP2
gene15133	805.682	1.06932	0.282589	3.78403	0.000154309	0.000638441	1286.26	1259.23	902.186	740.893	610.939	511.385	328.879	WNK4
gene15140	166.033	2.00572	0.295633	6.78451	1.16483e-11	4.99211e-10	218.867	275.586	377.604	81.6325	87.4157	53.3198	67.8102	LOC101112335
gene15141	51.6793	1.54339	0.402342	3.83602	0.000125045	0.000534703	51.6301	95.9905	100.376	29.9664	36.9089	29.0835	17.8002	LOC101113086
gene15148	829.515	1.33056	0.261412	5.0899	3.58255e-07	3.39989e-06	1622.98	1067.25	1104.13	484.628	642.991	350.618	534.005	LOC101107295
gene15150	403.866	1.28701	0.239391	5.37619	7.60801e-08	9.11043e-07	500.587	585.233	742.063	303.797	234.08	254.481	206.821	RUNDC1
gene15154	5161.31	1.45165	0.322199	4.50545	6.62338e-06	4.18706e-05	10419.2	5531.33	8338.35	2536.81	4035.69	1553.55	3714.3	VAT1
gene15164	1100.7	1.06982	0.19711	5.42754	5.71374e-08	7.19477e-07	1374.93	1602.94	1733.87	791.525	754.689	635.798	811.179	DHX8
gene15168	1059.5	1.26945	0.238552	5.32149	1.02919e-07	1.18195e-06	1535.43	1408.89	1830.66	746.059	656.589	455.642	783.207	DUSP3
gene15177	549.903	1.32534	0.29029	4.56558	4.98104e-06	3.29373e-05	947.299	707.027	857.973	296.564	423.481	191.467	425.509	TMEM101
gene15180	3100.96	1.5417	0.230476	6.68922	2.24356e-11	8.64075e-10	5879.09	4123.46	4884.95	1895.11	2046.5	1277.25	1600.32	HDAC5
gene15186	1310.3	1.35751	0.222328	6.10588	1.02235e-09	2.33844e-08	2000.1	1901.23	2130.59	1002.32	827.536	605.099	705.226	ATXN7L3
gene15187	2464.31	1.11136	0.190329	5.83915	5.24667e-09	9.29721e-08	3966.53	3502.11	3197.68	1864.11	1691.98	1446.1	1581.67	UBTF
gene15189	157.475	2.0649	0.28917	7.14078	9.2803e-13	5.87245e-11	228.968	277.65	328.611	92.9991	64.1049	55.7434	54.2481	SLC4A1
gene15191	2171.81	1.29372	0.282069	4.58655	4.50627e-06	3.01948e-05	4015.92	2426.6	3404.41	1264.79	1706.55	808.684	1575.74	SLC25A39
gene15192	1782.65	1.88633	0.267444	7.05318	1.74874e-12	9.96783e-11	3636.55	2273.84	3259.82	887.624	1125.72	589.749	705.226	GRN
gene15193	127.96	1.39004	0.31463	4.418	9.96192e-06	5.97925e-05	228.968	134.18	230.625	75.4326	75.7603	54.1277	96.6295	FAM171A2
gene15197	1078.93	1.06517	0.284934	3.73832	0.000185253	0.000745722	1778.99	1291.23	1542.68	555.928	1047.05	483.918	852.713	FZD2
gene15214	674.619	-1.03618	0.278106	-3.72586	0.000194652	0.000776428	464.67	554.268	244.964	919.657	788.684	987.224	762.864	NMT1
gene15216	223.61	1.11579	0.253277	4.4054	1.05587e-05	6.29984e-05	420.897	283.843	264.084	160.165	154.434	146.226	135.62	ACBD4
gene15219	125.46	1.18547	0.37409	3.16894	0.00152994	0.00457137	92.0362	227.074	234.21	111.599	76.7316	84.0191	52.5529	FMNL1
gene15238	397.051	-1.21173	0.257703	-4.70206	2.57548e-06	1.8614e-05	250.294	279.714	149.369	480.495	473.016	576.015	570.453	LOC101121024
gene15247	42.2088	-2.27742	0.445157	-5.11599	3.12103e-07	3.02206e-06	11.2239	18.5788	9.55959	45.4662	77.7029	71.9009	61.0292	EFCAB13
gene15257	1060.63	2.05824	0.325338	6.32645	2.50868e-10	7.04407e-09	1257.08	2018.9	2346.88	711.959	476.901	295.683	317.013	MRC2
gene15262	5185.11	-1.56694	0.228792	-6.84875	7.44963e-12	3.45227e-10	2241.42	3193.49	1896.38	7015.23	6517.33	8526.32	6905.62	TANC2
gene15264	300.851	2.74645	0.286941	9.57146	1.05405e-21	8.19281e-19	389.47	550.139	817.345	88.8658	82.5593	77.5561	100.02	CYB561
gene15265	80.8855	2.10993	0.421011	5.01157	5.3987e-07	4.87165e-06	182.95	116.634	132.639	54.7661	25.2534	40.3938	13.562	ACE
gene15276	611.995	1.33003	0.210656	6.31374	2.72373e-10	7.53653e-09	874.344	982.613	941.619	438.129	371.031	296.49	379.737	FTSJ3
gene15277	2142.04	1.58429	0.273463	5.79343	6.89652e-09	1.15618e-07	4289.78	2715.6	3373.34	1123.22	1480.24	710.123	1301.96	PSMC5
gene15278	2904.81	1.10597	0.215701	5.12733	2.93878e-07	2.88051e-06	5061.99	3681.7	3811.89	1946.78	2148.48	1535.77	2147.04	SMARCD2
gene15304	1764.68	-1.52021	0.213571	-7.11805	1.09463e-12	6.70905e-11	782.308	1048.67	728.919	2426.24	2296.12	2876.85	2193.66	PITPNC1
gene15308	2627.66	1.32246	0.231969	5.70104	1.1908e-08	1.85116e-07	4908.22	2967.45	4121.38	1656.42	1880.41	1312.8	1546.92	METRNL
gene15324	806.813	1.03435	0.247191	4.18442	2.85898e-05	0.000147878	1336.77	932.037	1151.93	459.829	747.89	457.258	561.977	C11H17orf62
gene15326	321.298	1.23925	0.269568	4.59717	4.28277e-06	2.89018e-05	581.399	348.869	506.658	223.198	241.85	146.226	200.888	OGFOD3
gene15327	66.23	2.69331	0.459482	5.86162	4.58384e-09	8.31216e-08	194.174	60.8972	129.054	18.5998	32.0524	16.9654	11.8668	UTS2R
gene15338	8338.6	1.94009	0.24447	7.9359	2.08977e-15	3.10739e-13	17915.6	10532.1	14869.9	4684.05	4029.87	3082.85	3255.74	FASN
gene15339	1067.47	1.04935	0.228217	4.59805	4.26464e-06	2.88128e-05	1924.9	1335.61	1283.37	866.958	746.919	623.68	690.816	DUS1L
gene15340	1191.43	1.44653	0.259652	5.57104	2.53222e-08	3.54636e-07	2317.74	1487.34	1794.81	678.893	869.301	461.297	730.655	GPS1
gene15343	233.243	1.5595	0.30146	5.17316	2.30173e-07	2.35264e-06	462.426	245.653	415.842	133.299	152.492	84.827	138.163	LOC105606262
gene15347	1504.72	1.14199	0.228191	5.00451	5.60044e-07	5.01926e-06	2790.27	2104.57	1670.54	1126.32	1039.28	912.9	889.161	ASPSCR1
gene15348	191.214	1.16126	0.3609	3.21768	0.00129233	0.00394763	337.84	350.933	149.369	182.898	83.5306	138.147	95.7819	NOTUM
gene15350	591.164	1.06576	0.231356	4.60657	4.09363e-06	2.78334e-05	841.794	1009.45	676.341	383.363	425.423	328.805	472.976	PYCR1
gene15353	954.893	1.46702	0.297667	4.92841	8.29017e-07	7.01792e-06	2162.85	1079.64	1266.65	477.395	732.35	380.509	584.863	PCYT2
gene15356	4709.83	1.76002	0.289404	6.08152	1.19046e-09	2.66322e-08	9941.03	6356.02	7358.49	2445.88	3243.12	1330.57	2293.68	ARHGDIA
gene15358	8068.02	1.64156	0.264698	6.20162	5.58864e-10	1.37703e-08	13754.9	11510.6	14301.1	4342.02	5184.72	2431.71	4950.99	P4HB
gene15363	161.494	1.0789	0.264352	4.08132	4.47812e-05	0.000219027	242.437	250.814	199.556	133.299	81.588	106.64	116.125	SLC25A10
gene15365	1673.48	1.30288	0.216923	6.00619	1.89939e-09	3.92266e-08	3076.48	2364.67	2162.86	1174.89	1103.38	991.264	840.846	HGS
gene15373	305.639	1.63154	0.272511	5.98706	2.13674e-09	4.32823e-08	638.641	415.959	440.936	150.865	195.228	113.91	183.935	FAAP100
gene15376	59695.4	1.28124	0.267283	4.79355	1.63858e-06	1.2589e-05	104576	72078.6	93183.3	32968.2	44984.1	23226.4	46851.7	ACTG1
gene15377	487.898	1.124	0.245086	4.58615	4.51497e-06	3.02413e-05	552.217	918.619	647.662	381.296	290.414	336.884	288.193	BAHCC1
gene15381	2242.26	1.45004	0.236615	6.12825	8.88486e-10	2.06991e-08	3909.29	2817.79	3820.25	1572.72	1487.04	1030.04	1058.69	SLC38A10
gene15384	329.358	1.44676	0.246252	5.87512	4.22543e-09	7.75266e-08	582.522	533.625	431.376	227.331	187.458	139.763	203.431	CEP131
gene15387	659.852	1.45737	0.285014	5.11333	3.16523e-07	3.05966e-06	1422.07	806.114	880.677	358.563	511.868	264.175	375.499	CHMP6
gene15393	254.237	1.24568	0.246107	5.06152	4.15919e-07	3.86744e-06	389.47	290.036	460.055	160.165	151.521	181.772	146.639	SGSH
gene15396	590.487	1.46981	0.34927	4.20822	2.57387e-05	0.000135093	602.725	1397.54	789.861	379.23	296.242	484.725	183.087	GAA
gene15407	854.201	1.99363	0.300788	6.62801	3.40236e-11	1.22228e-09	1976.53	884.558	1617.96	421.596	487.586	285.18	305.993	ENGASE
gene15408	354.255	1.84582	0.376367	4.90432	9.37527e-07	7.79752e-06	597.113	389.123	822.125	152.932	302.07	97.753	118.668	C1QTNF1
gene15410	528.24	1.69729	0.278212	6.10071	1.05597e-09	2.40122e-08	836.182	808.178	975.078	300.697	385.601	182.58	209.364	LGALS3BP
gene15417	45.8257	1.67044	0.433866	3.85014	0.000118053	0.000507594	50.5077	101.151	74.0868	21.6998	37.8802	20.1969	15.2573	SOCS3
gene15426	1812.53	1.61503	0.288248	5.60292	2.1077e-08	3.02872e-07	3674.71	2173.72	2990.96	941.357	1365.63	595.404	945.952	SYNGR2
gene15429	82.6654	1.0926	0.36572	2.98754	0.00281232	0.0076724	117.851	99.087	138.614	88.8658	48.5643	33.1229	52.5529	LOC106991439
gene1543	3471.75	1.0298	0.210849	4.88405	1.03929e-06	8.51143e-06	4935.16	4669.47	5096.46	3093.77	2013.48	2398.58	2095.33	PVRL4
gene15439	1131.9	1.04791	0.212025	4.94239	7.71694e-07	6.59799e-06	1332.28	1530.69	1953.74	836.992	844.047	743.246	682.34	SEC14L1
gene15448	141.618	2.61344	0.338451	7.72176	1.1473e-14	1.29071e-12	172.848	293.132	347.73	40.2996	63.1336	42.8174	31.3622	ST6GALNAC1
gene15454	42.1763	1.33371	0.390121	3.4187	0.000629206	0.00213178	51.6301	88.7654	52.5777	24.7998	25.2534	24.2363	27.9717	CYGB
gene15455	550.803	1.01463	0.256812	3.95087	7.78685e-05	0.000353572	647.62	876.301	798.226	520.795	332.18	399.091	281.412	RHBDF2
gene15458	653.861	1.67246	0.345363	4.84261	1.28144e-06	1.01777e-05	778.94	1157.05	1290.54	542.495	281.673	362.736	163.592	UBE2O
gene15459	1018.01	1.03078	0.207202	4.97476	6.5329e-07	5.71712e-06	1532.07	1395.48	1383.75	836.992	750.804	661.65	565.367	SPHK1
gene15462	966.756	1.21672	0.275348	4.41884	9.92329e-06	5.95815e-05	1920.41	979.516	1400.48	530.095	720.694	470.184	745.912	UBALD2
gene15471	1395.64	1.14945	0.193954	5.92643	3.09589e-09	5.88512e-08	2123.57	1942.52	2035	1039.52	1006.25	786.871	835.76	SRP68
gene15472	3313.13	1.373	0.253542	5.41529	6.11895e-08	7.57668e-07	6283.15	4691.15	4335.27	2792.04	1684.21	1837.11	1568.96	EVPL
gene15478	386.736	1.13469	0.216401	5.24346	1.57595e-07	1.70454e-06	585.889	592.458	505.463	299.664	246.707	263.367	213.602	FBF1
gene15482	849.695	1.27252	0.215349	5.90908	3.44017e-09	6.45032e-08	1174.02	1186.98	1470.98	636.527	534.207	429.79	515.357	WBP2
gene15483	1523.52	1.3007	0.274432	4.7396	2.14144e-06	1.58316e-05	3115.76	1582.3	2221.41	831.825	1176.23	698.813	1038.34	UNC13D
gene15488	2986.73	1.67533	0.247426	6.77104	1.27861e-11	5.39859e-10	4843.12	4792.3	5113.18	2054.25	1712.38	1363.69	1028.17	ITGB4
gene15491	508.555	1.46381	0.280018	5.22755	1.71769e-07	1.83808e-06	1103.31	587.297	708.605	376.13	304.012	225.397	255.136	RECQL5
gene15495	700.665	1.35858	0.234236	5.80004	6.62982e-09	1.11854e-07	1270.55	957.841	997.782	552.828	377.83	391.82	356.003	LLGL2
gene15497	661.695	1.86524	0.24645	7.56842	3.77801e-14	3.62944e-12	1030.36	1208.65	1150.74	395.763	362.29	256.904	227.164	CASKIN2
gene155	3069.65	-1.10943	0.18727	-5.92423	3.13773e-09	5.94498e-08	1752.05	2021.99	1768.52	3347.97	4073.57	4277.7	4245.76	AGO3
gene15504	933.442	1.07463	0.218255	4.92375	8.48998e-07	7.17996e-06	1269.43	1338.71	1392.12	821.492	623.566	525.119	563.672	GGA3
gene15514	488.312	1.17859	0.234598	5.02387	5.06396e-07	4.61095e-06	595.99	733.863	820.93	399.896	257.391	296.49	313.622	KCTD2
gene15515	6355.22	-1.01257	0.27732	-3.65127	0.000260944	0.00100097	5422.28	3245.1	3388.87	5341.25	8514.29	7703.9	10870.8	ATP5H
gene15522	462.816	1.31456	0.236091	5.56802	2.57647e-08	3.59068e-07	798.021	753.474	556.846	300.697	341.893	247.21	241.574	HID1
gene15523	141.127	1.05762	0.335268	3.15455	0.00160744	0.0047779	309.78	152.759	139.809	98.1657	72.8464	101.792	112.734	OTOP3
gene15524	524.402	1.28145	0.299239	4.28238	1.84908e-05	0.000101703	870.977	683.287	816.15	420.562	276.816	423.327	179.697	OTOP2
gene15528	23.3802	2.80261	0.697867	4.01596	5.92047e-05	0.000278515	31.427	38.1898	68.1121	3.09997	5.82772	16.1575	0.847627	GRIN2C
gene1553	622.38	1.0505	0.232469	4.51886	6.21739e-06	3.96706e-05	985.461	774.117	890.237	467.062	534.207	354.657	350.918	B4GALT3
gene15531	2290.8	1.76526	0.276374	6.38722	1.68927e-10	4.98043e-09	4298.76	2827.08	4391.44	1268.92	1410.31	677	1162.1	SLC9A3R1
gene15553	380.039	1.80653	0.268125	6.73766	1.60963e-11	6.55349e-10	525.28	554.268	846.024	233.531	181.63	138.147	181.392	CDC42EP4
gene15556	2274.07	1.08337	0.210659	5.14277	2.70723e-07	2.68993e-06	3887.97	2914.81	2967.06	1840.35	1576.4	1360.46	1371.46	COG1
gene15558	68.4191	1.3083	0.449233	2.91229	0.00358785	0.00944899	140.299	58.8329	112.325	21.6998	63.1336	25.852	56.791	SSTR2
gene1558	297.664	1.0903	0.281142	3.87809	0.000105278	0.000459717	502.832	330.29	448.106	219.064	186.487	134.107	262.764	TOMM40L
gene15583	8618.02	1.0672	0.278348	3.83406	0.000126046	0.000538039	14363.3	10288.5	12214.8	5219.31	7894.61	3455.28	6890.36	PRKAR1A
gene15585	1119.93	1.10908	0.20624	5.37763	7.54723e-08	9.06304e-07	1881.13	1548.23	1414.82	870.058	759.546	719.817	645.892	WIPI1
gene15594	2865.45	-1.09674	0.275342	-3.98319	6.79962e-05	0.000313998	2397.43	1806.27	1003.76	3304.57	3556.85	4280.93	3708.37	CEP112
gene1562	324.181	1.23627	0.390147	3.16873	0.00153108	0.00457398	477.017	567.686	403.893	144.665	412.797	111.487	151.725	MPZ
gene15624	947.271	1.77021	0.34099	5.19138	2.08736e-07	2.16326e-06	1720.63	1205.56	1840.22	660.293	654.647	269.83	279.717	FMOD
gene15625	971.633	2.28569	0.338072	6.76096	1.37078e-11	5.67564e-10	1041.58	1892.97	2405.43	549.728	405.026	227.821	278.869	PRELP
gene15633	327.906	1.25228	0.307451	4.0731	4.6391e-05	0.000226136	552.217	559.429	359.68	166.365	274.874	127.644	255.136	ETNK2
gene15644	804.492	-1.18304	0.271337	-4.36003	1.30047e-05	7.52665e-05	377.124	689.48	331.001	999.223	976.142	1215.05	1043.43	MDM4
gene15657	50.7435	2.21555	0.367614	6.02685	1.67187e-09	3.52951e-08	80.8123	97.0227	97.9858	24.7998	15.5406	16.1575	22.8859	LOC106991447
gene15681	1109.16	1.67022	0.224639	7.43515	1.04449e-13	9.02062e-12	1904.7	1610.16	1956.13	695.426	594.427	419.288	584.015	MAPKAPK2
gene15690	855.224	1.10393	0.289274	3.8162	0.000135524	0.000570478	946.177	1231.36	1516.39	889.691	485.643	444.332	472.976	C12H1orf116
gene15694	11.8377	-3.05992	0.899961	-3.40005	0.000673723	0.00226339	0	1.03216	5.97474	27.8997	11.6554	20.1969	16.1049	C4BPA
gene15699	2856.05	-1.00716	0.235483	-4.27699	1.89436e-05	0.000103992	1441.15	2257.33	1733.87	3070	4657.32	3256.55	3576.14	CD55
gene15704	1186.75	-1.21303	0.310619	-3.9052	9.4147e-05	0.000416752	1026.99	637.873	365.654	1288.55	1376.31	1737.74	1874.1	KCNT2
gene15729	607.726	-1.14549	0.214853	-5.33148	9.74153e-08	1.12706e-06	310.903	375.705	390.748	649.96	803.253	803.836	919.675	TROVE2
gene15733	35.9803	-1.51713	0.508145	-2.98562	0.00283004	0.0077146	13.4687	27.8682	10.7545	51.6661	28.1673	77.5561	42.3814	RGS13
gene1575	70.8843	1.33278	0.37229	3.57996	0.00034365	0.00127085	77.4451	124.891	121.885	56.8328	38.8514	51.704	24.5812	HSPA6
gene15752	377.078	-2.41131	0.42441	-5.68155	1.33482e-08	2.04164e-07	143.666	133.148	48.9929	275.897	1054.82	504.114	478.909	ESRRG
gene15755	2734.23	-1.33976	0.21566	-6.21236	5.2194e-10	1.29726e-08	1536.56	1619.45	1218.85	2989.4	3345.11	4156.52	4273.74	GPATCH2
gene15772	2151.26	-1.87032	0.174557	-10.7147	8.68746e-27	2.47592e-23	914.75	876.301	771.937	3079.3	3095.49	3060.23	3260.82	MARK1
gene15776	128.745	-1.66651	0.319101	-5.2225	1.76524e-07	1.87955e-06	49.3853	80.5082	41.8232	205.631	164.147	217.319	142.401	LOC101123651
gene15780	47.5694	1.15719	0.36158	3.20037	0.0013725	0.00416131	85.3018	60.8972	62.1373	27.8997	37.8802	26.6599	32.2098	HHIPL2
gene15781	665.741	-1.23249	0.254329	-4.84606	1.2594e-06	1.00307e-05	349.064	500.596	277.228	985.79	756.632	1019.54	771.341	TAF1A
gene15787	1333.14	-1.4406	0.237064	-6.07686	1.22561e-09	2.71797e-08	573.543	837.079	609.424	1353.65	1842.53	1970.41	2145.34	DISP1
gene15791	1113.13	-1.26408	0.374328	-3.37693	0.000732987	0.00243169	692.516	690.513	470.81	2667.01	690.584	1596.36	984.095	CAPN8
gene15799	2270.91	-1.0472	0.210889	-4.96566	6.84692e-07	5.93423e-06	1624.1	1475.98	1132.81	2540.94	2739.03	3410.04	2973.48	CNIH4
gene15817	1143.3	1.45572	0.279427	5.20965	1.89195e-07	1.98359e-06	2652.21	1127.11	1606.01	618.96	733.321	586.518	678.949	EPHX1
gene15821	415.445	1.11025	0.204612	5.42612	5.75938e-08	7.23095e-07	603.847	608.972	584.33	317.23	280.702	236.708	276.326	PYCR2
gene15829	963.272	-1.61818	0.216629	-7.46983	8.02973e-14	7.22675e-12	439.978	463.438	420.622	1049.86	1263.64	1522.85	1582.52	LIN9
gene15830	1596.03	1.29705	0.207741	6.24358	4.27656e-10	1.09969e-08	2328.96	2347.12	2565.55	1044.69	1202.45	808.684	874.751	PARP1
gene15855	422.899	-1.40995	0.381413	-3.69664	0.00021847	0.000857238	167.236	357.126	126.665	388.529	911.066	617.217	392.451	LOC101106609
gene15859	2517.46	-1.32126	0.272029	-4.85707	1.19134e-06	9.5778e-06	1730.73	1539.98	797.031	2704.21	3404.36	3661.29	3784.66	LOC101117005
gene15865	67.5837	-1.4699	0.345184	-4.25833	2.05962e-05	0.000111737	42.6509	33.029	25.0939	78.5325	86.4444	92.9057	114.43	C12H1orf100
gene15871	547.438	-1.36866	0.273535	-5.00361	5.62654e-07	5.03738e-06	326.616	356.094	179.242	579.694	858.617	720.625	811.179	SDCCAG8
gene15886	270.981	-1.05628	0.315707	-3.34575	0.000820618	0.00267647	217.744	196.11	88.4262	315.163	450.677	331.229	297.517	RGS7
gene1589	1216	-1.29816	0.256299	-5.06503	4.08338e-07	3.80315e-06	612.826	929.973	445.716	1676.05	1480.24	1799.95	1567.26	LOC101108006
gene15890	10.0162	-3.45049	0.973311	-3.54511	0.000392454	0.00142151	0	1.03216	3.58485	12.3999	17.4831	16.9654	18.6478	XCL1
gene15899	1798.84	-1.52094	0.243645	-6.24244	4.30806e-10	1.10612e-08	986.583	926.876	695.46	1752.52	2431.13	2724.16	3075.19	NME7
gene159	974.952	1.76671	0.272198	6.49053	8.55336e-11	2.72878e-09	1464.72	1424.38	2013.49	573.494	577.915	289.22	481.452	COL8A2
gene15905	1560.19	-1.05416	0.212711	-4.95585	7.20136e-07	6.20995e-06	992.195	892.815	1013.32	2081.11	1532.69	2415.55	1993.62	SLC19A2
gene15919	72.3365	-1.79608	0.459595	-3.90796	9.30797e-05	0.000412978	47.1405	33.029	9.55959	94.0324	97.1286	155.112	70.3531	MROH9
gene15921	78.0579	-2.37963	0.409039	-5.81762	5.96925e-09	1.03419e-07	34.7942	19.611	14.3394	103.332	158.32	140.57	75.4388	LOC101104591
gene15924	829.801	-1.35305	0.263459	-5.13574	2.81043e-07	2.77954e-06	420.897	595.554	301.127	1093.26	1256.84	1261.09	879.837	FMO4
gene15928	875.149	2.08658	0.37305	5.5933	2.228e-08	3.16962e-07	1498.39	822.629	2340.9	413.329	533.236	179.348	338.203	MYOC
gene15931	264.209	1.05366	0.251605	4.18775	2.81731e-05	0.000146432	456.814	321.001	347.73	225.264	188.429	155.112	155.116	METTL13
gene15932	1615.46	-1.20996	0.306148	-3.9522	7.74361e-05	0.000351795	795.776	1398.57	573.575	1573.75	2824.5	2056.85	2085.16	DNM3
gene15953	1548.65	1.55434	0.226101	6.87455	6.21844e-12	2.96199e-10	2499.57	2221.2	2734.04	1071.56	912.037	651.148	750.998	MFN2
gene15955	962.99	1.60209	0.276292	5.79856	6.68883e-09	1.12689e-07	1607.27	1417.15	1658.59	530.095	776.057	380.509	371.261	PLOD1
gene15978	1459.47	-1.52527	0.307662	-4.9576	7.13679e-07	6.16048e-06	775.573	934.101	401.503	2328.08	1447.22	2649.83	1680	MASP2
gene15997	4482.9	1.4997	0.234286	6.40116	1.54197e-10	4.59369e-09	6726.5	5707.82	8890.42	3040.04	2758.45	2009.19	2247.91	CLSTN1
gene16008	948.539	1.51147	0.27249	5.54689	2.90798e-08	3.97493e-07	967.502	1607.07	1948.96	573.494	651.733	427.366	463.652	H6PD
gene16011	592.159	-1.6107	0.342259	-4.70608	2.52532e-06	1.82901e-05	351.309	305.518	160.123	1026.09	559.461	1190.81	551.805	GPR157
gene16014	6640.76	1.00286	0.318621	3.14751	0.00164668	0.00487419	11638.1	6993.89	9281.17	3949.36	6393.98	2359	5869.82	ENO1
gene16026	585.87	-1.05417	0.317431	-3.32093	0.000897186	0.0028887	234.58	585.233	267.668	876.258	720.694	838.575	578.082	PER3
gene16028	2897.16	-1.25404	0.251286	-4.99049	6.02264e-07	5.33612e-06	1896.84	1899.17	1055.14	3649.7	3218.84	4594.39	3966.05	CAMTA1
gene16033	456.403	1.30539	0.236681	5.5154	3.4798e-08	4.63071e-07	599.358	697.738	777.912	353.396	215.625	261.752	289.041	KLHL21
gene16039	396.958	1.3796	0.256849	5.37126	7.81876e-08	9.32889e-07	676.803	472.728	687.095	307.93	237.965	182.58	213.602	ESPN
gene16040	1493.34	1.1171	0.237639	4.70084	2.59088e-06	1.87174e-05	2799.25	1629.77	2044.56	1113.92	1065.5	808.684	991.724	HES2
gene16046	1142.1	1.50992	0.236675	6.3797	1.77432e-10	5.20426e-09	1620.73	1627.71	2196.32	692.326	752.747	457.258	647.587	ICMT
gene16051	437.936	-1.00377	0.293222	-3.42326	0.000618753	0.00210059	309.78	359.19	164.903	676.827	439.021	630.143	485.69	NPHP4
gene16058	324.186	1.30159	0.231369	5.62561	1.84854e-08	2.71579e-07	483.751	453.117	535.337	256.264	177.745	183.388	179.697	LRRC47
gene1606	668.473	-1.05361	0.241934	-4.35492	1.33115e-05	7.67453e-05	448.957	402.541	390.748	720.226	703.211	833.728	1179.9	NUF2
gene16074	463.068	1.04198	0.244547	4.26086	2.03638e-05	0.000110687	804.755	568.718	593.889	296.564	355.491	243.171	378.889	FAM213B
gene16078	348.294	1.15736	0.346861	3.33668	0.000847858	0.00275425	393.96	668.837	462.445	378.196	163.176	237.515	133.925	PLCH2
gene16079	351.006	1.00083	0.274509	3.6459	0.00026646	0.00101889	661.089	437.634	375.214	298.63	267.104	182.58	234.793	PEX10
gene16083	1869.18	1.17441	0.243809	4.81694	1.4578e-06	1.13932e-05	2422.12	2791.98	3010.08	1602.68	1341.35	870.082	1045.97	SKI
gene16092	19.2847	3.59247	0.757507	4.74249	2.11105e-06	1.56205e-05	58.3644	22.7074	40.6283	0	4.85643	0.807876	7.62864	TMEM52
gene16094	5905.18	1.27194	0.235273	5.40623	6.4364e-08	7.91817e-07	8767.01	7904.25	9959.9	4043.39	4460.14	2474.52	3727.02	GNB1
gene16095	3176.63	1.24348	0.207404	5.99546	2.02906e-09	4.1529e-08	5403.2	4010.96	4810.86	2270.21	2053.3	1605.25	2082.62	NADK
gene16097	3253.62	1.05121	0.203303	5.17063	2.3331e-07	2.37901e-06	5044.03	4016.12	4797.72	2660.81	2283.49	1853.27	2119.92	LOC101104843
gene1610	4070.42	-1.18069	0.27195	-4.34158	1.4146e-05	8.07669e-05	2674.66	2885.91	1522.36	4055.79	6765.01	5964.55	4624.65	PBX1
gene16100	98.6271	1.5787	0.299032	5.27937	1.29631e-07	1.44072e-06	173.971	113.537	189.997	52.6995	54.392	54.9355	50.8576	C12H1orf233
gene16104	539.28	1.0121	0.263886	3.83539	0.000125368	0.000535812	734.045	894.879	642.882	530.095	311.783	376.47	284.803	ATAD3A
gene16105	1144.71	1.3849	0.271712	5.09692	3.45217e-07	3.29236e-06	2195.4	1436.76	1671.73	752.259	933.406	527.543	495.862	VWA1
gene16106	95.6585	1.31689	0.410594	3.20727	0.00133999	0.00407431	142.544	85.669	207.921	48.5662	85.4732	29.0835	70.3531	TMEM88B
gene16112	1344.05	1.10252	0.246809	4.4671	7.92871e-06	4.9017e-05	2149.38	1590.55	2063.68	1039.52	1135.43	778.792	650.978	MXRA8
gene16113	688.605	1.65301	0.249503	6.6252	3.46777e-11	1.24056e-09	1058.42	1233.43	1092.18	514.595	323.438	315.072	283.107	DVL1
gene16115	1063.33	1.107	0.261092	4.23988	2.23636e-05	0.00011988	1933.88	1106.47	1557.02	693.36	791.598	506.538	854.408	CPTP
gene16116	1648.76	1.00824	0.208667	4.83183	1.35285e-06	1.06804e-05	2873.32	2095.28	1971.67	1291.65	1107.27	1119.72	1082.42	CPSF3L
gene16117	158.848	1.09621	0.279864	3.91693	8.96846e-05	0.000399449	292.944	207.463	184.022	136.399	95.186	100.984	94.9342	PUSL1
gene16122	227.226	1.0244	0.2672	3.83381	0.000126173	0.000538312	283.965	287.972	388.358	188.065	181.63	113.103	147.487	B3GALT6
gene16123	1508.66	1.65422	0.288998	5.72399	1.0405e-08	1.64182e-07	3057.4	1849.62	2510.59	810.125	1087.84	466.952	778.122	SDF4
gene16130	120.103	1.149	0.295396	3.88969	0.000100371	0.000440283	193.051	131.084	200.751	103.332	66.0474	72.7088	73.7436	RNF223
gene16132	2538.39	1.2927	0.214206	6.03487	1.59093e-09	3.40913e-08	4102.34	3717.83	3685.22	2049.08	1498.69	1314.41	1401.13	AGRN
gene16138	971.576	1.25477	0.201397	6.2303	4.65537e-10	1.18286e-08	1682.47	1395.48	1284.57	699.56	610.939	571.976	556.043	NOC2L
gene16139	936.639	1.22448	0.218746	5.59771	2.17202e-08	3.10288e-07	1708.28	1396.51	1069.48	642.727	551.69	614.793	572.996	SAMD11
gene16146	548.662	1.15192	0.283504	4.06315	4.84144e-05	0.000234131	1187.49	538.786	673.951	360.63	409.883	304.569	365.327	SLC25A34
gene16147	3660.32	1.04723	0.196338	5.33379	9.61831e-08	1.11507e-06	5380.75	4980.15	5212.37	3135.1	2322.34	2291.94	2299.61	PLEKHM2
gene16155	2827.51	1.55957	0.235333	6.62707	3.42409e-11	1.2275e-09	4659.05	3655.9	5312.74	1594.42	1816.3	1097.9	1656.26	EFHD2
gene16158	62.4958	1.18976	0.391636	3.03791	0.00238227	0.00666222	50.5077	122.827	102.766	44.4329	33.0237	51.704	32.2098	LOC105616540
gene16161	762.72	-1.98854	0.290783	-6.83859	7.99784e-12	3.66657e-10	417.53	276.618	154.148	1130.46	1099.5	1133.45	1127.34	LOC105616544
gene16188	3946.24	1.0463	0.283348	3.69263	0.000221949	0.00086929	6022.76	3754.98	7008.37	2616.37	3589.87	1759.55	2871.76	PRDX6
gene16198	188.378	-1.1994	0.314643	-3.81193	0.000137883	0.000579028	132.442	100.119	92.011	314.13	192.315	322.342	165.287	SERPINC1
gene162	2655.31	1.58654	0.221751	7.1546	8.3915e-13	5.45607e-11	4514.26	3782.85	4574.26	1721.52	1652.16	1152.03	1190.07	MAP7D1
gene16200	707.075	-1.49425	0.322291	-4.63634	3.54636e-06	2.45318e-05	287.332	530.528	222.26	630.327	1004.31	987.224	1287.55	LOC105616620
gene16201	2973.41	-2.02771	0.276609	-7.3306	2.29118e-13	1.79721e-11	1076.37	1456.37	700.24	3144.4	4240.63	5224.53	4971.33	RABGAP1L
gene16208	27.7289	1.59954	0.471125	3.39516	0.000685895	0.00229796	53.8748	42.3184	38.2384	18.5998	20.397	10.5024	10.1715	TNN
gene16217	55.389	-2.38225	0.408321	-5.83425	5.40325e-09	9.49595e-08	8.97914	20.6431	19.1192	63.0327	91.3009	88.8663	95.7819	ASTN1
gene16225	4939.01	-1.12155	0.184579	-6.07627	1.23011e-09	2.71797e-08	2676.91	3385.47	2799.76	5800.04	6427	6515.52	6968.34	RASAL2
gene16240	144.589	-1.37499	0.413559	-3.32479	0.000884866	0.00285441	135.809	34.0612	57.3575	180.832	211.74	260.944	131.382	AXDND1
gene16241	169.489	2.27328	0.494171	4.60019	4.22112e-06	2.85527e-05	279.476	218.817	431.376	27.8997	154.434	37.9702	36.448	NPHS2
gene16248	1491.14	-1.24791	0.201526	-6.19231	5.9288e-10	1.45554e-08	686.904	880.429	938.035	1831.05	1887.21	1947.79	2266.55	TOR1AIP1
gene16251	1854.35	1.42879	0.256111	5.57878	2.42212e-08	3.41171e-07	3419.93	1912.59	3348.25	1277.19	1099.5	832.112	1090.9	QSOX1
gene16260	766.498	1.2812	0.233821	5.47942	4.26722e-08	5.53219e-07	1211.06	942.359	1310.86	513.561	555.576	350.618	481.452	IER5
gene16261	246.676	-1.25215	0.396326	-3.15939	0.00158102	0.00470837	79.6899	234.299	99.1807	197.365	358.404	499.267	258.526	CACNA1E
gene16274	208.569	1.25564	0.295861	4.244	2.19566e-05	0.000117987	214.377	307.583	414.647	151.898	131.124	93.7136	146.639	RGS16
gene16282	130.852	-1.73562	0.387587	-4.47801	7.53433e-06	4.6884e-05	43.7733	91.8619	32.2636	180.832	116.554	194.698	255.983	SHCBP1L
gene16285	682.641	-1.45257	0.270715	-5.3657	8.06359e-08	9.56223e-07	352.431	433.506	241.38	1011.62	687.67	1193.23	858.646	NMNAT2
gene16304	449.42	-1.33628	0.283934	-4.7063	2.52248e-06	1.82773e-05	211.01	349.901	158.928	536.295	530.322	656.803	702.683	SWT1
gene16311	1660.78	-1.09689	0.213338	-5.14157	2.72451e-07	2.70396e-06	776.696	1208.65	1032.44	2133.81	2204.82	2352.53	1916.48	HMCN1
gene16314	96.4545	-1.54189	0.327744	-4.70455	2.54428e-06	1.84196e-05	43.7733	61.9294	32.2636	107.466	136.951	164.807	127.992	PRG4
gene16346	358.698	1.03273	0.24434	4.22662	2.37231e-05	0.000126061	410.796	433.506	676.341	235.598	238.936	251.249	264.46	ATF3
gene16349	1417	1.14687	0.318766	3.59785	0.000320859	0.00119588	2590.48	1651.45	1948.96	693.36	1426.82	534.814	1073.1	NENF
gene16364	655.876	-1.1559	0.223543	-5.17079	2.331e-07	2.37901e-06	391.715	453.117	310.687	996.123	802.282	904.013	733.197	TRAF5
gene16369	354.713	-1.17397	0.312993	-3.7508	0.000176268	0.000715617	248.049	270.425	100.376	510.462	410.854	511.385	431.442	KCNH1
gene16371	585.769	-1.15539	0.248303	-4.65316	3.26888e-06	2.28928e-05	286.21	475.824	270.058	785.325	799.368	804.644	678.949	HHAT
gene16440	34.3832	1.36366	0.448257	3.04214	0.00234899	0.00658488	41.5285	38.1898	78.8666	18.5998	27.196	20.1969	16.1049	IGFN1
gene16441	3890.76	1.09102	0.296633	3.67803	0.000235039	0.000913656	4599.56	5816.2	6334.42	4278.99	1891.09	2433.32	1881.73	PKP1
gene16444	506.629	1.31245	0.311705	4.21054	2.54765e-05	0.000133757	1015.77	447.956	843.634	322.397	386.572	200.353	329.727	LOC101109820
gene16445	1196.11	1.25002	0.219017	5.70742	1.14703e-08	1.78798e-07	1856.44	1616.36	1891.6	838.025	886.784	563.089	720.483	ADIPOR1
gene16461	2000.74	1.01163	0.211041	4.79352	1.63878e-06	1.2589e-05	2871.08	2899.33	2658.76	1695.68	1539.49	1211.81	1129.04	CSRP1
gene16463	809.595	2.05156	0.237414	8.64129	5.55808e-18	1.82775e-15	1745.32	1103.37	1438.72	377.163	397.256	273.062	332.27	TNNT2
gene1647	3105.71	-1.13682	0.204259	-5.56561	2.61231e-08	3.6288e-07	1710.53	2017.87	1800.79	3236.37	3837.55	4386.77	4750.1	DCAF6
gene16470	431.108	1.27179	0.291695	4.35999	1.30066e-05	7.52665e-05	909.138	438.666	596.279	238.698	346.749	206.816	281.412	SHISA4
gene16474	869.003	1.15757	0.214863	5.3875	7.1445e-08	8.66454e-07	1594.92	1087.89	1124.45	617.927	549.748	580.863	527.224	RNPEP
gene16475	91.9094	1.46534	0.306404	4.78238	1.73236e-06	1.32129e-05	168.359	112.505	152.953	55.7994	51.4782	40.3938	61.8768	ELF3
gene16482	3585.91	-1.47374	0.254781	-5.78435	7.27935e-09	1.20969e-07	2159.48	2016.83	1160.3	3997.93	5689.79	5537.18	4539.89	PLCB1
gene16484	913.502	-1.09636	0.324498	-3.37865	0.000728416	0.00242003	507.321	729.734	423.012	789.459	1979.48	1036.5	928.999	PLCB4
gene16492	192.698	-1.38435	0.326725	-4.23706	2.26463e-05	0.000121054	83.057	70.1866	148.174	265.564	360.347	218.126	203.431	SNAP25
gene16494	2774.52	-1.02316	0.241326	-4.23976	2.2376e-05	0.000119909	1937.25	1804.21	1493.69	3808.83	2706	4724.46	2947.2	MKKS
gene16507	1958.96	-1.44279	0.212035	-6.8045	1.01402e-11	4.48057e-10	1108.92	1098.21	757.597	2558.51	2492.32	3078.01	2619.17	TASP1
gene16509	3508.72	-1.00697	0.315302	-3.19365	0.00140486	0.00424212	3161.78	1816.59	1696.83	2572.97	4652.46	4172.68	6487.74	ESF1
gene16510	583.137	-1.16218	0.273507	-4.24918	2.14558e-05	0.000115703	427.632	383.962	212.701	754.326	600.255	908.86	794.227	NDUFAF5
gene16513	3246.41	-2.29028	0.288501	-7.93857	2.04533e-15	3.06799e-13	1270.55	1224.14	525.777	4125.03	5458.63	5304.51	4816.22	MACROD2
gene1652	871.447	1.79011	0.313445	5.71107	1.12269e-08	1.75645e-07	1928.27	1268.52	1205.7	476.362	473.016	538.045	210.212	LOC101111513
gene16520	955.375	-1.65841	0.308133	-5.38211	7.36165e-08	8.88385e-07	604.97	455.181	223.455	1199.69	1080.07	1638.37	1485.89	SNRPB2
gene16521	84.3651	-1.7192	0.516347	-3.32954	0.000869884	0.00281617	52.7524	34.0612	22.704	39.2663	193.286	66.2458	182.24	OTOR
gene16524	184.453	-1.02762	0.288756	-3.55879	0.000372572	0.00136219	103.26	119.73	124.275	170.498	335.094	222.166	216.145	LOC101107122
gene16530	84.854	-1.34767	0.328817	-4.09854	4.15768e-05	0.000205125	30.3046	46.447	58.5525	107.466	138.894	112.295	100.02	PRKCQ
gene16533	364.611	-1.69917	0.293218	-5.7949	6.83604e-09	1.14717e-07	135.809	238.428	103.961	447.429	530.322	613.178	483.147	SFMBT2
gene16534	896.293	1.02736	0.326129	3.15015	0.00163187	0.00483707	1407.48	1121.95	1263.06	607.594	876.1	271.446	726.416	LOC101114294
gene16537	29.0988	-2.24791	0.501319	-4.484	7.32581e-06	4.57497e-05	5.61196	11.3537	10.7545	47.5329	48.5643	47.6647	32.2098	ITIH2
gene16549	2251.47	-1.38554	0.25252	-5.48686	4.09145e-08	5.3431e-07	967.502	1625.65	921.305	2737.27	3201.36	3685.53	2621.71	CELF2
gene16555	1311.68	1.26883	0.201481	6.29755	3.02385e-10	8.22064e-09	1860.93	1782.53	2268.01	733.659	838.22	745.669	952.733	ECHDC3
gene16569	600.857	-1.47998	0.367339	-4.02892	5.60347e-05	0.000265575	319.882	457.245	113.52	788.425	761.488	1105.98	659.454	LOC101109728
gene16570	778.467	-1.08178	0.255984	-4.22595	2.3793e-05	0.000126354	627.417	430.409	368.044	776.026	923.693	1130.22	1193.46	LOC101118373
gene16596	748.434	-1.70545	0.328717	-5.18819	2.12346e-07	2.19138e-06	414.163	419.055	145.784	1155.26	784.799	1153.65	1166.33	CCDC7
gene16598	86.8139	-2.55649	0.333373	-7.66855	1.73949e-14	1.82487e-12	25.815	24.7717	17.9242	122.965	161.233	123.605	131.382	MALRD1
gene16599	6794.07	-1.60662	0.204371	-7.86128	3.80233e-15	5.24353e-13	3215.65	3618.74	2563.16	8102.29	9221.39	10628.4	10208.8	PLXDC2
gene16600	106.29	-1.62081	0.348444	-4.65157	3.29416e-06	2.30167e-05	72.9555	28.9004	44.2131	141.565	168.032	117.142	171.221	LOC101112339
gene16603	1405.94	-2.187	0.310828	-7.03607	1.97739e-12	1.10863e-10	446.712	680.191	264.084	2354.94	1548.23	2707.19	1840.2	LOC106991518
gene16604	786.538	-2.6561	0.369388	-7.19053	6.45411e-13	4.32805e-11	188.562	322.033	74.0868	1200.72	955.745	1574.55	1190.07	C13H10orf113
gene16625	6907.78	-1.17615	0.209853	-5.60465	2.08672e-08	3.00868e-07	4030.51	4946.09	3072.21	8856.61	8606.56	9773.68	9068.76	KIAA1217
gene16632	467.317	-1.10265	0.271688	-4.05852	4.93854e-05	0.00023822	305.291	296.229	244.964	459.829	897.468	528.351	539.091	PRTFDC1
gene16633	61.6301	-2.02892	0.409774	-4.95131	7.37172e-07	6.33131e-06	31.427	26.8361	8.36464	82.6658	104.899	84.827	92.3914	ENKUR
gene1664	8982.82	-1.10285	0.321598	-3.42927	0.000605208	0.00206156	8062.14	4055.34	4157.23	6930.5	12052.7	10641.3	16980.5	ATP5O
gene16640	28.6923	1.8792	0.554671	3.38795	0.000704183	0.00234957	26.9374	56.7686	63.3323	18.5998	18.4544	4.03938	12.7144	FZD8
gene16644	101.456	-1.37174	0.38636	-3.55042	0.000384619	0.00139966	47.1405	86.7011	25.0939	170.498	130.152	143.802	106.801	LOC105607887
gene16652	1800.11	-1.21175	0.253996	-4.77073	1.83562e-06	1.38804e-05	851.896	1448.12	781.496	2380.78	2221.33	2823.53	2093.64	FRMD4A
gene16659	73.2935	-1.29867	0.339301	-3.82749	0.000129458	0.000549262	42.6509	49.5435	27.4838	84.7325	84.5019	113.103	111.039	SUV39H2
gene1666	1107.23	-1.01746	0.214249	-4.74897	2.04453e-06	1.51941e-05	750.881	711.156	633.323	1077.76	1494.81	1432.36	1650.33	CRYZL1
gene16675	45.934	-1.31732	0.433579	-3.03825	0.00237959	0.00665973	14.5911	29.9325	29.8737	38.2329	85.4732	58.1671	65.2673	CUBN
gene16679	277.914	-1.00817	0.251274	-4.01225	6.01422e-05	0.000282381	185.195	212.624	130.249	321.363	309.84	388.588	397.537	HACD1
gene16686	1276.35	-1.10644	0.258926	-4.27319	1.92696e-05	0.000105612	1033.72	778.246	495.904	1588.22	1597.77	1944.56	1496.06	CACNB2
gene16695	1332.76	-1.57941	0.245064	-6.44488	1.1569e-10	3.55808e-09	824.958	576.975	469.615	1884.78	1561.83	2252.36	1758.83	ZNF438
gene16710	1839.56	1.71485	0.203787	8.4149	3.93223e-17	9.7451e-15	3496.25	2635.09	3025.61	987.857	986.826	756.98	988.333	BAMBI
gene16723	11.0153	-2.73167	0.871453	-3.13461	0.00172084	0.00506216	4.48957	1.03216	2.3899	14.4665	6.799	25.0441	22.8859	LOC101120769
gene16728	18.5487	-2.04904	0.583829	-3.50967	0.00044867	0.00159407	4.48957	8.25725	7.16969	22.7331	24.2821	30.6993	32.2098	PCSK2
gene16734	3526.58	1.67003	0.270467	6.1746	6.63313e-10	1.61346e-08	7188.92	4781.98	5425.07	2007.75	2519.52	1232.01	1530.81	RRBP1
gene16754	1397.45	-1.40247	0.296858	-4.72438	2.30813e-06	1.68888e-05	746.391	1014.61	400.308	1942.65	1434.59	2248.32	1995.31	SLC24A3
gene16765	753.497	-1.09895	0.257499	-4.2678	1.97411e-05	0.000107712	428.754	626.519	311.882	1032.29	851.818	1086.59	936.628	RALGAPA2
gene16772	12.3872	3.03665	0.80746	3.76074	0.00016941	0.000692212	12.3463	15.4823	46.603	5.16661	2.91386	0.807876	3.39051	PAX1
gene16777	1099.36	1.28854	0.241879	5.32721	9.97312e-08	1.14997e-06	1556.76	1684.48	1736.26	836.992	698.355	442.716	739.978	THBD
gene16778	321.849	1.31459	0.354051	3.713	0.000204819	0.000810179	359.166	459.31	647.662	210.798	315.668	100.984	159.354	CD93
gene16783	664.645	-1.04872	0.301876	-3.47401	0.000512745	0.00178974	408.551	578.007	250.939	807.025	687.67	1179.5	740.826	NAPB
gene16802	1341.51	1.00248	0.239827	4.18	2.91515e-05	0.00015042	2217.85	1462.57	1957.33	997.157	1172.34	724.665	858.646	PYGB
gene1682	3754.65	-1.33056	0.264456	-5.03132	4.87105e-07	4.44477e-06	1875.52	2747.6	1413.62	4953.75	3779.27	5334.4	6178.35	PAXBP1
gene16843	861.221	1.43057	0.300195	4.76549	1.88399e-06	1.41797e-05	1832.87	837.079	1363.44	456.729	602.197	335.268	600.968	LOC101111215
gene16876	297.477	-1.45883	0.264699	-5.51129	3.56214e-08	4.72924e-07	120.096	182.692	143.394	371.996	346.749	373.239	544.177	C13H20orf196
gene16880	280.953	-1.05276	0.308526	-3.41222	0.000644354	0.00217799	158.257	255.975	107.545	294.497	309.84	419.288	421.271	MCM8
gene16894	300.533	-1.75465	0.263696	-6.65406	2.85121e-11	1.05761e-09	112.239	144.502	125.47	576.594	372.974	435.445	336.508	ADRA1D
gene16897	945.87	-1.95616	0.237559	-8.23443	1.80418e-16	3.6728e-14	368.145	447.956	255.719	1276.15	1228.68	1555.16	1489.28	RNF24
gene16903	2706.09	1.52891	0.293553	5.20829	1.90591e-07	1.99456e-06	6049.7	3162.53	3743.77	1254.45	2053.3	1025.19	1653.72	CENPB
gene16918	1452.47	-1.2938	0.27558	-4.69481	2.66849e-06	1.92293e-05	589.256	1209.69	581.94	1987.08	1877.5	2156.22	1765.61	C13H20orf194
gene16922	762.258	1.50582	0.234824	6.41253	1.4312e-10	4.296e-09	1253.71	983.645	1393.31	437.096	501.184	315.072	451.785	LOC101122805
gene16935	806.428	1.02658	0.313746	3.272	0.0010679	0.00334451	1151.57	916.555	1343.12	735.726	748.861	450.795	298.365	CPXM1
gene16942	91.5943	-1.62669	0.41668	-3.90393	9.4642e-05	0.00041851	42.6509	60.8972	21.5091	80.5992	103.928	203.585	127.992	TMC2
gene16946	4759.51	2.12163	0.251178	8.44673	2.9958e-17	7.75279e-15	10296.8	6492.26	8713.57	1741.15	2483.58	1423.48	2165.69	TGM3
gene1697	1125.3	-2.35102	0.286554	-8.20447	2.31611e-16	4.65947e-14	353.554	467.567	187.607	1881.68	1392.82	1827.41	1766.45	LOC105616415
gene16973	1520.73	1.41052	0.223291	6.31698	2.66717e-10	7.404e-09	2816.08	2064.31	2208.26	977.523	1024.71	677.808	876.446	PRPF6
gene16975	296.699	1.9527	0.35664	5.47527	4.36849e-08	5.6549e-07	324.371	669.869	549.676	229.398	108.784	106.64	88.1532	ZNF512B
gene16977	1221.51	1.50538	0.241691	6.22855	4.70781e-10	1.19265e-08	1887.86	1752.6	2177.2	770.859	705.154	449.987	806.941	DNAJC5
gene16978	2640.02	1.0209	0.214524	4.7589	1.94653e-06	1.45416e-05	4174.18	3103.69	3874.02	1997.41	1940.63	1401.66	1988.53	TPD52L2
gene16979	45.8114	1.7057	0.409581	4.16449	3.12044e-05	0.000159759	66.2212	87.7333	74.0868	17.5665	18.4544	37.9702	18.6478	ABHD16B
gene16982	1013.31	1.36072	0.229189	5.93711	2.90092e-09	5.54875e-08	1994.49	1281.94	1392.12	694.393	645.905	529.159	555.196	ZGPAT
gene16984	366.715	1.13254	0.268934	4.21121	2.54009e-05	0.000133401	528.647	421.12	646.467	239.731	266.132	163.999	300.908	TNFRSF6B
gene16985	587.372	1.12049	0.276168	4.05729	4.96457e-05	0.000239139	893.424	996.031	658.417	567.294	312.754	386.165	297.517	RTEL1
gene16989	252.913	1.34575	0.362112	3.7164	0.000202083	0.000800468	371.512	482.017	307.102	261.431	89.3583	163.191	95.7819	SRMS
gene16990	860.135	1.11512	0.25122	4.43883	9.0449e-06	5.49832e-05	1369.32	1183.88	1173.44	769.826	399.199	627.719	497.557	PTK6
gene16991	5442.79	1.14833	0.301168	3.81291	0.00013734	0.000576888	10076.8	5778.01	7934.46	3028.67	4806.89	2074.62	4400.03	PPDPF
gene17011	298.145	1.27656	0.314997	4.05261	5.06503e-05	0.000243087	673.435	367.448	304.712	249.031	182.602	163.999	145.792	RBBP8NL
gene17014	3258.62	1.21734	0.280237	4.34397	1.39929e-05	8.01604e-05	4660.17	5094.72	4741.56	3128.9	1723.06	2183.69	1278.22	LAMA5
gene17015	1498.62	1.47925	0.248052	5.96349	2.46907e-09	4.85859e-08	3069.74	1776.34	2250.09	853.525	1047.05	669.729	823.894	ADRM1
gene17016	1260.27	1.31309	0.224063	5.86037	4.61838e-09	8.36591e-08	2126.93	1505.92	2107.89	826.658	886.784	609.946	757.779	OSBPL2
gene17022	492.767	1.02293	0.271446	3.76845	0.000164267	0.000674096	599.358	775.149	707.41	514.595	280.702	275.486	296.669	LSM14B
gene1703	67354.2	1.06704	0.298832	3.5707	0.000356031	0.00130991	126022	52368.5	109730	46907.7	58777.4	33419.4	44254.6	LOC101103772
gene17033	28.215	-1.72719	0.486771	-3.54826	0.000387788	0.00140879	8.97914	15.4823	11.9495	30.9997	48.5643	48.4725	33.0575	ZNF831
gene17034	2890.34	-1.07186	0.246852	-4.34213	1.4111e-05	8.06477e-05	1808.17	1433.66	2079.21	2801.34	3333.45	3734	5042.53	PRELID3B
gene17036	62.6143	-1.69969	0.391686	-4.33943	1.42856e-05	8.15092e-05	26.9374	28.9004	26.2889	119.865	67.99	110.679	57.6386	TUBB1
gene17037	1850.54	1.82727	0.253693	7.20266	5.90495e-13	4.00693e-11	3918.27	2324.42	3172.59	953.757	1135.43	726.28	723.026	CTSZ
gene1707	30059.8	1.38733	0.29945	4.63292	3.60549e-06	2.48906e-05	36572	41832.3	60974.6	9446.64	20165.8	18270.9	23156.3	LOC101106046
gene17083	16.0083	-2.60464	0.669492	-3.89047	0.000100051	0.000439248	4.48957	3.09647	4.77979	27.8997	19.4257	21.0048	31.3622	LOC101121190
gene17084	1351.76	1.13441	0.238374	4.75893	1.94623e-06	1.45416e-05	2569.16	1472.89	1845	869.025	882.899	772.329	1051.06	FAM110A
gene17085	71.1431	1.20921	0.321441	3.76186	0.000168654	0.000689782	113.362	84.6368	118.3	36.1663	42.7366	46.8568	55.9434	SLC52A3
gene17090	1254.97	1.05804	0.201183	5.25912	1.44748e-07	1.57857e-06	1866.54	1489.4	1999.15	974.424	851.818	763.443	839.998	TBC1D20
gene17095	352.863	1.01935	0.220142	4.63042	3.64928e-06	2.51624e-05	523.035	446.924	519.803	250.064	265.161	195.506	269.545	ZCCHC3
gene1710	1409.72	1.51489	0.347948	4.35378	1.3381e-05	7.7094e-05	1165.04	3187.3	2376.75	449.495	803.253	752.94	1133.28	LOC101116371
gene17107	152.442	1.07537	0.343166	3.13366	0.00172639	0.00507414	278.353	185.788	188.802	117.799	153.463	58.9749	83.9151	REM1
gene1713	7343.69	2.0697	0.29963	6.9075	4.93265e-12	2.429e-10	13770.6	9160.39	16082.8	2904.67	4702.97	1938.9	2845.48	LOC101106558
gene17141	113.684	3.80091	0.492799	7.71291	1.22984e-14	1.37453e-12	474.772	109.409	142.199	21.6998	8.74157	17.7733	21.1907	BPIFB2
gene17142	96.5748	1.76377	0.572095	3.08301	0.00204918	0.00587442	312.025	142.438	31.0687	56.8328	17.4831	67.8616	48.3147	BPIFB6
gene1715	1008.19	1.48219	0.20922	7.08438	1.39673e-12	8.23589e-11	1584.82	1386.19	1806.76	560.061	506.04	523.503	689.968	CLDN8
gene17158	47.4325	-1.32818	0.439496	-3.02204	0.00251076	0.00697206	19.0807	40.2541	16.7293	72.3326	43.7079	84.827	55.0958	LOC101116754
gene17160	1858.1	-1.53476	0.26667	-5.75526	8.65062e-09	1.40214e-07	963.013	1076.54	634.518	2909.84	1795.91	3266.24	2360.64	CDK5RAP1
gene1717	63.673	-2.48604	0.40914	-6.07625	1.23024e-09	2.71797e-08	10.1015	27.8682	14.3394	80.5992	87.4157	105.024	120.363	GRIK1
gene17175	1858.92	-1.0154	0.246804	-4.11419	3.88544e-05	0.00019348	1565.74	978.484	977.468	1899.25	2160.14	2588.43	2842.94	EIF2S2
gene17182	1889.75	1.21144	0.253379	4.78114	1.743e-06	1.32807e-05	3596.15	2169.59	2628.89	1074.66	1472.47	904.013	1382.48	DYNLRB1
gene17183	1853.29	1.55658	0.304853	5.10601	3.29027e-07	3.1591e-06	4581.61	1809.37	2535.68	902.091	1304.44	816.762	1023.09	MAP1LC3A
gene17190	1723.85	1.26978	0.241649	5.25466	1.48302e-07	1.61423e-06	3291.98	1834.14	2644.42	991.99	1118.92	923.402	1262.12	ACSS2
gene17192	858.702	1.42099	0.308355	4.6083	4.05967e-06	2.76465e-05	2029.29	713.22	1270.23	592.094	455.533	475.031	475.519	MYH7B
gene17198	1657.93	1.17289	0.24588	4.77017	1.8407e-06	1.39028e-05	2472.63	2098.37	2722.09	1111.86	843.076	873.314	1484.2	FAM83C
gene17220	509.316	1.2181	0.231098	5.27091	1.35748e-07	1.50051e-06	812.612	643.033	810.175	376.13	340.921	240.747	341.594	AAR2
gene17222	2394.74	1.88474	0.287117	6.56437	5.2255e-11	1.77902e-09	5302.18	2929.26	4084.33	1063.29	1604.56	749.709	1029.87	MYL9
gene1723	440.371	-1.1189	0.276467	-4.04715	5.18456e-05	0.000248127	310.903	321.001	158.928	560.061	468.16	608.33	655.216	USP16
gene17236	2310.15	1.08835	0.221095	4.92253	8.54331e-07	7.21792e-06	3219.02	3159.43	3559.75	1687.42	1769.68	1089.82	1685.93	RPN2
gene17240	685.257	1.17046	0.257401	4.54722	5.43592e-06	3.54382e-05	1212.18	878.365	921.305	437.096	584.714	304.569	458.566	MANBAL
gene17244	718.17	1.16138	0.394626	2.94298	0.00325066	0.00870001	1731.85	336.483	1081.43	407.129	595.398	410.401	464.5	NNAT
gene17252	61.4348	1.55087	0.419935	3.69311	0.000221531	0.000867953	71.8331	115.601	107.545	38.2329	55.3633	18.5811	22.8859	TGM2
gene17257	7542.29	-1.40385	0.332136	-4.22673	2.37114e-05	0.000126038	3731.95	6024.7	1902.36	11053.5	7730.46	13360.6	8992.48	LOC105616742
gene17272	2370.17	1.44521	0.22116	6.53469	6.37435e-11	2.11653e-09	3217.9	3704.41	4214.58	1508.65	1581.25	1009.04	1355.36	MAFB
gene17279	884.776	1.68087	0.27938	6.01644	1.78295e-09	3.71358e-08	1404.11	1058.99	1910.72	650.993	391.428	415.248	361.937	LPIN3
gene17282	221.562	-1.74382	0.29795	-5.85272	4.83584e-09	8.65893e-08	75.2003	118.698	89.6211	216.998	427.366	326.382	296.669	PTPRT
gene17294	167.781	-1.36656	0.309423	-4.41649	1.00317e-05	6.01902e-05	84.1794	90.8297	89.6211	178.765	307.898	271.446	151.725	TOX2
gene17300	2354.35	1.57912	0.35907	4.39782	1.09345e-05	6.47481e-05	5237.08	1739.18	4418.92	1267.89	1608.45	688.31	1520.64	FITM2
gene1732	1744.86	-1.03399	0.211847	-4.88082	1.05645e-06	8.62717e-06	1019.13	1209.69	1045.58	1692.58	2366.05	2577.12	2303.85	CYYR1
gene17320	256.911	1.8358	0.445968	4.11643	3.84778e-05	0.000191996	517.423	241.525	549.676	197.365	174.831	74.3246	43.229	MATN4
gene17322	208.782	1.05139	0.240402	4.37345	1.22296e-05	7.12767e-05	361.41	252.878	274.838	156.032	146.664	135.723	133.925	LOC106990174
gene17323	4061.21	1.1912	0.239973	4.96388	6.90996e-07	5.9828e-06	7352.79	4624.06	5971.16	2529.57	3045.95	1935.67	2969.24	SDC4
gene17361	52.8297	1.29158	0.376212	3.43312	0.000596679	0.00203657	76.3227	82.5725	80.0616	37.1996	43.7079	18.5811	31.3622	ZSWIM1
gene17364	2270.66	1.41915	0.21767	6.51972	7.04404e-11	2.30753e-09	3740.93	3085.11	3779.62	1576.85	1432.65	995.303	1284.16	CTSA
gene17365	1028.93	1.46373	0.273927	5.34348	9.11768e-08	1.0628e-06	1840.72	1386.19	1627.52	730.559	773.144	445.14	399.232	PLTP
gene17366	1025.96	1.36621	0.196654	6.94725	3.72471e-12	1.91269e-10	1738.59	1409.93	1584.5	716.093	582.772	559.05	590.796	PCIF1
gene17367	1257.22	1.33719	0.204567	6.53667	6.29022e-11	2.09266e-09	1903.58	1938.39	1917.89	922.757	741.091	769.906	606.901	ZNF335
gene17368	25.7234	1.92798	0.575073	3.35257	0.000800643	0.00262229	71.8331	19.611	41.8232	18.5998	5.82772	10.5024	11.8668	MMP9
gene17379	274.84	1.92047	0.261202	7.35244	1.94618e-13	1.56979e-11	415.285	503.692	503.073	174.632	106.841	121.181	99.1724	SLC2A10
gene1739	858.829	-1.1108	0.200436	-5.54191	2.99189e-08	4.0766e-07	477.017	604.844	467.225	1048.82	1236.45	1035.7	1141.75	JAM2
gene17398	276.391	1.03615	0.277135	3.73879	0.000184909	0.000744687	316.515	394.284	461.25	191.165	262.247	174.501	134.773	PTGIS
gene17412	578.8	1.37305	0.27907	4.92008	8.65084e-07	7.29795e-06	1092.09	611.036	971.493	318.263	432.222	239.131	387.366	CEBPB
gene17433	2702.6	-1.45396	0.225632	-6.44395	1.16403e-10	3.5736e-09	1578.08	1495.59	991.807	3794.36	3534.51	4318.1	3205.73	TSHZ2
gene17441	506.623	-1.07614	0.273743	-3.93121	8.45177e-05	0.000379331	388.348	345.772	195.972	754.326	499.241	694.773	667.93	PFDN4
gene17451	1636.13	1.0418	0.218417	4.76976	1.84441e-06	1.39247e-05	2757.72	2025.09	2167.64	1401.19	1119.89	989.648	991.724	VAC14
gene17465	2050.21	1.24506	0.238555	5.21919	1.79709e-07	1.90752e-06	3121.37	2954.03	3109.26	1231.72	1391.85	871.698	1671.52	AARS
gene17481	314.32	1.09847	0.327678	3.35228	0.0008015	0.00262409	718.331	336.483	301.127	164.298	275.845	210.048	194.107	LDHD
gene17482	540.658	-1.06795	0.251685	-4.24319	2.20364e-05	0.000118311	294.067	455.181	247.354	671.66	612.881	762.635	740.826	ZFP1
gene1749	187.776	-2.29266	0.322466	-7.10978	1.16227e-12	7.07287e-11	42.6509	83.6047	47.7979	204.598	324.409	253.673	357.699	NCAM2
gene17497	6429.75	1.00397	0.277684	3.61551	0.000299756	0.0011268	9354.02	7447.01	10233.5	4115.73	5418.8	2597.32	5841.85	KARS
gene17500	113.365	-1.15447	0.339359	-3.40191	0.00066916	0.00225027	38.1613	81.5403	80.0616	175.665	169.975	107.447	140.706	CNTNAP4
gene17504	170.989	1.47808	0.321562	4.59656	4.29525e-06	2.89282e-05	151.523	282.811	375.214	101.266	89.3583	84.0191	112.734	MON1B
gene17505	360.456	1.22156	0.236991	5.15447	2.54356e-07	2.55916e-06	480.384	520.207	604.644	250.064	208.826	179.348	279.717	SYCE1L
gene17508	1399.43	-1.31062	0.254776	-5.14422	2.6863e-07	2.67379e-06	598.235	1021.83	653.637	1676.05	2191.22	2169.15	1485.89	ADAMTS18
gene17514	3705.42	-2.09661	0.291237	-7.19899	6.06616e-13	4.08391e-11	1605.02	1516.24	748.038	3910.09	6249.25	6802.31	5106.95	WWOX
gene17544	5033.02	-1.00454	0.169095	-5.94067	2.83864e-09	5.45921e-08	3240.35	3427.79	2918.06	6120.37	6538.7	6490.47	6495.37	CDH13
gene1755	9.62967	-5.36833	1.46502	-3.66434	0.000247977	0.000959367	1.12239	0	0	20.6665	33.0237	2.42363	10.1715	TMPRSS15
gene17550	311.839	1.12157	0.229141	4.89468	9.84656e-07	8.14592e-06	536.504	367.448	449.301	223.198	223.396	191.467	191.564	MLYCD
gene17554	41.7124	-1.25825	0.399247	-3.15156	0.00162399	0.00481956	29.1822	24.7717	15.5343	63.0327	56.3346	57.3592	45.7719	SLC38A8
gene17555	1878.72	1.15957	0.19992	5.80015	6.6256e-09	1.11854e-07	2416.51	2573.17	3245.48	1384.65	1272.38	1104.37	1154.47	MBTPS1
gene17567	318.835	1.04473	0.252808	4.1325	3.58832e-05	0.000180578	523.035	360.223	472.005	288.297	199.114	204.393	184.783	TLDC1
gene17568	753.045	1.23144	0.247036	4.98488	6.19989e-07	5.46282e-06	1162.8	940.294	1258.28	590.027	542.949	333.653	443.309	COTL1
gene17575	563.122	1.0181	0.204175	4.9864	6.15151e-07	5.4278e-06	768.839	755.538	851.998	458.795	405.998	350.618	350.07	KIAA0513
gene17583	5951.07	1.35698	0.331927	4.08818	4.34775e-05	0.00021364	13311.6	5643.83	8441.12	2803.41	5103.14	2175.61	4178.8	LOC101105179
gene17601	1265.04	1.43026	0.279041	5.12562	2.96553e-07	2.90106e-06	1305.34	2386.35	2232.16	994.057	526.437	696.389	714.55	SLC7A5
gene17611	1627.14	1.65938	0.316166	5.24843	1.53401e-07	1.66233e-06	3878.99	1800.08	2330.15	720.226	1026.65	523.503	1110.39	MVD
gene17613	675.404	1.14636	0.213312	5.37411	7.69617e-08	9.20334e-07	1143.72	943.391	862.753	531.128	441.935	403.13	401.775	CTU2
gene17615	1329.42	1.39959	0.232075	6.03077	1.63181e-09	3.46632e-08	1969.8	2174.75	2036.19	1063.29	755.66	705.276	600.968	PIEZO1
gene17616	107.182	1.00485	0.326417	3.07842	0.00208101	0.00595307	114.484	181.659	154.148	103.332	69.9326	77.5561	49.1624	LOC105602054
gene17617	283.6	1.26659	0.249771	5.071	3.95733e-07	3.70797e-06	527.524	394.284	354.9	204.598	198.142	159.959	145.792	CDT1
gene17629	1228.89	1.09995	0.194788	5.6469	1.63371e-08	2.44413e-07	1853.07	1527.59	1922.67	919.657	744.005	771.521	863.732	SPG7
gene17633	1913.37	1.40998	0.287709	4.90073	9.5479e-07	7.92954e-06	3946.33	2349.19	2622.91	923.791	1521.03	735.167	1295.17	CHMP1A
gene17636	185.521	1.26027	0.348022	3.62124	0.000293189	0.00110625	393.96	249.782	189.997	114.699	180.659	85.6348	83.9151	SPATA2L
gene17641	2798.35	1.40936	0.2642	5.33445	9.58326e-08	1.11176e-06	5666.96	3003.57	4371.12	1560.32	2020.27	1198.08	1768.15	TCF25
gene17645	486.827	1.79043	0.208466	8.5886	8.80329e-18	2.68815e-15	846.284	752.442	860.363	274.864	246.707	225.397	201.735	LOC101113264
gene17646	669.656	1.51695	0.249565	6.07836	1.21416e-09	2.70694e-08	1433.3	807.146	957.154	360.63	431.251	316.687	381.432	DBNDD1
gene17652	860.997	-1.37253	0.222545	-6.16743	6.94067e-10	1.67398e-08	524.157	485.113	344.145	1000.26	1132.52	1282.91	1257.88	MYLK3
gene17654	1904.08	1.00871	0.222227	4.53909	5.64975e-06	3.6573e-05	2432.22	2391.51	3192.9	1563.42	1012.08	1407.32	1329.08	GPT2
gene17656	118.649	-1.21309	0.36447	-3.32836	0.000873596	0.00282552	77.4451	83.6047	41.8232	147.765	88.387	208.432	183.087	NETO2
gene17659	4865.92	-1.07862	0.198107	-5.44466	5.19052e-08	6.57954e-07	2813.84	3189.36	2922.84	5106.68	6083.16	6451.7	7493.87	ITFG1
gene17667	1458.45	2.26224	0.272304	8.30777	9.75156e-17	2.13784e-14	2253.76	3379.28	2355.24	661.327	575.973	647.916	335.66	ABCC11
gene1767	4620.22	-1.47982	0.212734	-6.9562	3.49578e-12	1.80597e-10	2352.53	2510.2	1990.78	4764.65	6989.37	7081.84	6652.18	USP25
gene17687	2879.61	-1.05369	0.262097	-4.02024	5.81391e-05	0.000274559	1652.16	2410.08	1286.96	4495.99	2834.21	4149.25	3328.63	NKD1
gene17707	5685.52	-1.49499	0.225275	-6.6363	3.21646e-11	1.16776e-09	3045.05	3349.35	1969.28	7211.56	7450.73	8771.91	8000.75	FTO
gene17714	764.631	1.0791	0.319361	3.37893	0.000727684	0.00241807	1525.33	640.969	1114.89	511.495	752.747	378.086	428.899	IRX3
gene17725	2354.16	1.79582	0.362377	4.95566	7.20834e-07	6.21283e-06	2781.29	3257.49	5867.2	1639.88	1577.37	643.069	712.854	MMP2
gene17734	1284.09	1.11257	0.318523	3.49291	0.000477788	0.00168392	2880.06	1016.67	1663.37	988.89	762.459	660.034	1017.15	LOC101117955
gene1776	225.653	-1.33661	0.389784	-3.4291	0.000605576	0.00206241	51.6301	131.084	179.242	164.298	364.232	327.998	361.089	SAMSN1
gene17767	804.416	1.35171	0.241429	5.59876	2.15888e-08	3.09186e-07	1415.34	942.359	1340.73	547.661	459.418	365.968	559.434	DOK4
gene17771	9023.03	1.05557	0.194854	5.41723	6.05306e-08	7.53357e-07	13311.6	11755.2	13410.9	7531.89	5884.05	5942.73	5324.79	ADGRG1
gene17773	36.8189	1.54808	0.465923	3.32261	0.000891811	0.00287302	93.1586	45.4149	38.2384	25.8331	21.3683	21.0048	12.7144	DRC7
gene17774	566.323	1.1282	0.218082	5.17328	2.30023e-07	2.35251e-06	943.932	709.091	808.98	415.396	372.003	303.761	411.099	KATNB1
gene17780	72.7734	1.38879	0.375874	3.69484	0.000220028	0.000862952	90.9138	88.7654	157.733	39.2663	61.191	27.4678	44.0766	ZNF319
gene17783	299.304	1.55633	0.363173	4.28538	1.8243e-05	0.000100631	515.178	366.415	559.236	201.498	264.19	94.5215	94.0866	MMP15
gene17790	106.371	1.44044	0.309092	4.66024	3.15841e-06	2.2235e-05	200.908	140.373	157.733	77.4992	52.4494	44.4332	71.2007	GINS3
gene17794	268.833	1.23461	0.244295	5.05378	4.33146e-07	4.00151e-06	425.387	397.38	377.604	209.765	192.315	144.61	134.773	SLC38A7
gene1780	618.724	-1.06695	0.277842	-3.84013	0.000122968	0.000526872	325.494	290.036	526.972	641.694	734.292	733.551	1079.03	LOC101122496
gene17812	38.587	-2.27641	0.487508	-4.66949	3.01951e-06	2.13804e-05	16.8359	15.4823	3.58485	59.9327	67.99	62.2064	44.0766	LOC101103916
gene17819	77.1983	-1.27614	0.416568	-3.06347	0.0021879	0.0062086	56.1196	54.7043	16.7293	83.6992	85.4732	147.033	96.6295	CCDC79
gene17824	19.3024	2.54328	0.756403	3.36233	0.000772871	0.002544	52.7524	24.7717	32.2636	4.13329	15.5406	5.65513	0	RRAD
gene1783	3761.76	-2.42632	0.361903	-6.70435	2.02303e-11	7.89814e-10	1279.53	1210.72	733.698	3056.57	10651.1	4640.44	4760.27	ROBO2
gene17833	215.128	1.41425	0.341096	4.14619	3.38054e-05	0.000171331	244.682	319.968	438.546	135.365	189.401	70.2852	107.649	B3GNT9
gene17840	635.837	1.24072	0.221473	5.60213	2.11729e-08	3.03994e-07	1039.34	872.172	933.255	453.629	439.021	298.106	415.337	E2F4
gene17841	1314.6	1.15626	0.22457	5.14877	2.62194e-07	2.62194e-06	2495.08	1674.16	1588.09	959.957	883.87	829.688	771.341	ELMO3
gene17849	383.857	1.48161	0.333453	4.44323	8.86171e-06	5.39848e-05	763.227	377.769	677.536	163.265	352.577	172.078	180.545	TPPP3
gene17851	111.695	1.44288	0.312608	4.61561	3.9194e-06	2.68087e-05	232.335	136.245	156.538	47.5329	60.2197	72.7088	76.2864	HSD11B2
gene17852	2920.03	1.24111	0.264576	4.69095	2.71941e-06	1.95633e-05	5418.91	3132.59	4516.91	1813.48	2318.46	1252.21	1987.69	ATP6V0D1
gene1787	10648	-1.54084	0.270394	-5.69849	1.20875e-08	1.87565e-07	4563.65	5930.77	4780.99	8611.71	14102.1	18125.5	18421.5	ROBO1
gene17871	1051.23	1.38557	0.214176	6.46931	9.84509e-11	3.09806e-09	1647.67	1646.29	1577.33	794.625	614.824	574.4	503.491	EDC4
gene17874	631.948	1.24768	0.211003	5.91306	3.35803e-09	6.30949e-08	921.484	893.847	1016.9	475.329	408.911	322.342	384.823	PSKH1
gene17878	1465.51	1.01549	0.240181	4.228	2.35778e-05	0.000125445	1798.07	2374.99	2007.51	1386.72	987.798	917.747	785.75	SLC12A4
gene17882	232.178	1.16578	0.294487	3.95869	7.53635e-05	0.000343566	422.02	242.557	354.9	133.299	176.774	105.832	189.868	DDX28
gene17891	1102.89	2.18104	0.280105	7.7865	6.8889e-15	8.68652e-13	2073.06	1299.48	2593.04	460.862	564.317	317.495	411.947	SMPD3
gene17906	1119.83	1.2754	0.213548	5.97242	2.33764e-09	4.66345e-08	1922.66	1403.73	1727.9	704.726	820.737	578.439	680.645	VPS4A
gene17913	5190.33	-1.04198	0.240866	-4.32599	1.51846e-05	8.61499e-05	2383.96	3681.7	3635.03	5286.48	6171.55	6662.55	8511.02	NFAT5
gene17927	20.0509	-2.02136	0.643981	-3.13885	0.00169612	0.00500321	10.1015	9.28941	2.3899	16.5332	33.995	46.8568	21.1907	PMFBP1
gene17928	930.037	1.61134	0.192954	8.35089	6.77508e-17	1.56559e-14	1628.59	1404.76	1498.47	531.128	524.494	418.48	504.338	DHX38
gene17936	1006.76	1.06371	0.226214	4.70222	2.57351e-06	1.86131e-05	1147.09	1328.39	1827.08	789.459	695.441	647.916	611.987	ATXN1L
gene17954	34.5693	-1.20723	0.410549	-2.94052	0.00327659	0.00876148	22.4478	15.4823	21.5091	49.5995	43.7079	46.8568	42.3814	HYDIN
gene17959	282.239	1.17467	0.312306	3.76128	0.000169045	0.000691219	463.548	317.904	460.055	198.398	269.046	109.063	157.659	PLEKHF1
gene17964	108.539	-1.46483	0.407384	-3.59569	0.000323539	0.00120455	24.6926	75.3474	62.1373	99.199	223.396	113.103	161.897	ZNF536
gene1798	242.165	-2.75427	0.361247	-7.62435	2.4527e-14	2.4527e-12	48.2629	65.0258	56.1626	221.131	655.618	316.687	332.27	CADM2
gene17990	238.172	1.29207	0.28025	4.6104	4.01891e-06	2.73798e-05	451.202	308.615	319.051	172.565	167.061	96.1372	152.573	LRP3
gene17992	761.585	1.50845	0.299134	5.0427	4.59003e-07	4.21307e-06	1488.29	832.95	1308.47	433.996	488.557	243.978	534.853	CEBPA
gene18012	171.792	1.56892	0.357863	4.38414	1.16445e-05	6.82621e-05	133.565	312.743	383.578	87.8324	77.7029	79.9797	127.144	LOC101113693
gene18016	553.693	11.4691	1.22625	9.35294	8.52466e-21	5.60661e-18	28.0598	2374.99	1470.98	0	0.971286	0	0.847627	LOC105607568
gene18029	1820.66	1.5137	0.261094	5.79752	6.73036e-09	1.13274e-07	3554.62	1972.45	3160.64	993.023	1186.91	733.551	1143.45	FXYD3
gene18036	1696.08	1.13019	0.222919	5.06994	3.97937e-07	3.72249e-06	3103.42	2007.54	2266.82	1189.35	1265.59	938.752	1101.07	USF2
gene18046	13209.4	1.07907	0.326179	3.30821	0.000938957	0.00299779	26578.3	11497.2	18613.7	6938.76	9195.16	5944.35	13698.5	DMKN
gene18047	28176.4	1.37417	0.323486	4.248	2.15691e-05	0.000116248	63695.8	27242.7	39304.2	13526.2	18438.9	10787.6	24239.6	SBSN
gene18055	1640.9	1.39469	0.291547	4.78375	1.72056e-06	1.31288e-05	3566.96	1804.21	2250.09	867.991	1233.53	645.493	1118.02	RBM42
gene18057	6001.07	-1.07535	0.308901	-3.48122	0.000499139	0.00174796	5576.05	2389.44	3061.46	5242.05	8152	7271.69	10314.8	LOC101121538
gene18062	1438.66	1.15397	0.25311	4.55919	5.13522e-06	3.3761e-05	2049.49	2399.76	1847.39	1269.95	840.162	1017.12	646.74	KMT2B
gene18067	247.294	1.34566	0.356665	3.7729	0.00016136	0.000664399	298.556	404.605	431.376	202.531	219.511	88.8663	85.6103	HSPB6
gene18071	162.568	1.44718	0.400744	3.61123	0.000304745	0.00114329	301.924	373.641	88.4262	106.432	85.4732	106.64	75.4388	ARHGAP33
gene18075	270.856	1.66528	0.264278	6.30126	2.95237e-10	8.10361e-09	505.077	331.322	498.294	174.632	114.612	121.181	150.878	APLP1
gene18079	237.257	1.38829	0.257785	5.38546	7.226e-08	8.73865e-07	471.405	278.682	350.12	143.632	152.492	120.373	144.097	LRFN3
gene18089	3655.17	1.41656	0.309693	4.57407	4.78331e-06	3.17969e-05	7039.65	4371.18	5652.11	1991.21	3238.27	1156.88	2136.87	CAPNS1
gene18093	644.834	-1.30531	0.235629	-5.53967	3.03036e-08	4.11917e-07	321.004	355.062	375.214	654.093	791.598	905.629	1111.24	ZNF567
gene18095	256.432	-1.72286	0.274749	-6.27067	3.59489e-10	9.48651e-09	125.708	80.5082	126.665	382.329	265.161	428.982	385.67	ZNF461
gene18097	438.692	-1.16814	0.256787	-4.54907	5.38842e-06	3.51687e-05	228.968	340.612	198.361	556.961	507.983	714.97	522.986	ZNF382
gene18108	307.175	-1.1448	0.273457	-4.1864	2.83408e-05	0.000147035	159.38	249.782	135.029	354.43	343.835	483.11	424.661	ZNF793
gene18122	324.201	-1.23377	0.238215	-5.17922	2.22813e-07	2.28835e-06	191.929	175.467	181.632	382.329	349.663	446.755	541.634	LOC101108415
gene18127	547.053	-1.44597	0.233514	-6.19221	5.9328e-10	1.45554e-08	327.739	237.396	261.694	830.792	591.513	873.314	706.921	LOC101109901
gene1814	1072.45	-1.19766	0.220438	-5.4331	5.53833e-08	6.98418e-07	554.462	672.966	622.568	1068.46	1424.88	1454.98	1708.82	ZNF654
gene18151	112.414	1.4176	0.323476	4.38238	1.17387e-05	6.86733e-05	227.846	140.373	156.538	56.8328	85.4732	45.241	74.5912	MAP4K1
gene18154	2824.3	1.26316	0.266836	4.73386	2.2029e-06	1.61881e-05	5872.36	3095.44	3741.38	2131.75	2028.04	1504.26	1396.89	CAPN12
gene18156	20958.5	1.07232	0.34094	3.14517	0.0016599	0.00490568	50836.5	17635.4	21309.5	13086	16019.4	9815.69	18007	LOC101112249
gene1816	9.49152	-3.84624	1.1218	-3.42863	0.00060663	0.00206559	0	2.06431	1.19495	9.29991	6.799	25.0441	22.0383	LOC105616630
gene18167	840.883	1.0957	0.303925	3.60515	0.000311977	0.00116735	1402.99	916.555	1304.88	502.195	852.789	331.229	575.539	LOC105602066
gene18173	788.909	1.09169	0.265428	4.11296	3.90624e-05	0.000194262	1251.47	1130.21	1014.51	798.759	459.418	464.529	403.471	PAK4
gene18174	1233.46	2.34859	0.302501	7.76392	8.23437e-15	9.87134e-13	2707.21	1440.89	2694.61	395.763	578.886	280.333	536.548	NCCRP1
gene18180	12.142	3.68607	0.867168	4.2507	2.13105e-05	0.000115101	46.0181	14.4502	16.7293	0	1.94257	1.61575	4.23814	LOC101114379
gene18182	53.5782	1.14135	0.371443	3.07276	0.00212088	0.0060546	65.0988	98.0548	70.502	33.0663	34.9663	25.0441	48.3147	LOC101116422
gene18185	1431.78	1.06839	0.235622	4.53434	5.77852e-06	3.72878e-05	1520.84	2080.83	2524.93	1189.35	916.894	959.756	829.827	SAMD4B
gene18186	1051.18	1.14814	0.2385	4.81398	1.4795e-06	1.15365e-05	1890.11	1236.52	1467.4	745.026	717.78	509.77	791.684	PAF1
gene18188	1188.66	1.32245	0.23565	5.61194	2.00073e-08	2.90182e-07	1511.86	1674.16	2240.53	854.558	823.65	577.631	638.263	ZFP36
gene18193	2089.26	1.22038	0.206977	5.89623	3.71909e-09	6.92017e-08	3164.02	3198.65	2938.38	1588.22	1447.22	1244.94	1043.43	SUPT5H
gene18199	324.387	1.39428	0.260893	5.34425	9.07943e-08	1.06051e-06	404.061	468.599	633.323	221.131	226.31	149.457	167.83	DYRK1B
gene182	340.074	1.03271	0.24651	4.18931	2.79799e-05	0.000145649	516.301	464.47	460.055	258.331	240.879	160.767	279.717	CDCA8
gene18203	2076.76	1.01691	0.258262	3.93751	8.23313e-05	0.000371272	3380.65	2330.61	3051.9	1281.32	1790.08	971.067	1731.7	PSMC4
gene1821	1370.13	-1.00305	0.198453	-5.05437	4.31815e-07	3.99137e-06	960.768	773.085	878.287	1451.82	1823.1	1762.78	1941.07	ARL13B
gene18212	3916.44	1.50605	0.27343	5.50799	3.62951e-08	4.80749e-07	7956.64	4415.56	6284.23	2271.24	2881.81	1467.91	2137.72	PLD3
gene18214	737.664	1.30636	0.219713	5.94576	2.75183e-09	5.34123e-08	1331.16	1043.51	979.858	431.929	555.576	407.977	413.642	PRX
gene18215	1087.46	1.13205	0.302063	3.74772	0.000178446	0.000722573	2178.56	1117.83	1436.33	685.093	905.238	431.406	857.799	SERTAD1
gene18221	5678.5	2.34359	0.264395	8.86395	7.72278e-19	3.14427e-16	10352.9	8838.35	12287.7	2586.41	2525.34	1867	1291.78	LTBP4
gene18224	1281.07	1.10899	0.207788	5.33712	9.44369e-08	1.0978e-06	2036.02	1588.49	1916.7	990.957	912.037	703.66	819.655	ITPKC
gene18227	254.676	1.00667	0.257584	3.90811	9.30196e-05	0.00041283	420.897	341.644	309.492	167.398	151.521	237.515	154.268	C14H19orf54
gene18234	1801.56	2.55009	0.317382	8.03478	9.37497e-16	1.55643e-13	3909.29	2429.7	3932.58	580.727	928.549	339.308	490.776	CYP2A6
gene1824	565.033	-1.02509	0.30689	-3.34026	0.000836997	0.00272414	296.312	280.746	488.734	613.794	474.959	751.324	1049.36	NSUN3
gene18246	307.792	1.27984	0.295392	4.33268	1.47304e-05	8.38238e-05	671.191	333.386	385.968	185.998	244.764	152.689	180.545	B3GNT8
gene18247	1934.83	1.27391	0.265911	4.79074	1.66165e-06	1.27361e-05	4021.53	1876.46	2832.03	1202.79	1394.77	988.84	1227.36	BCKDHA
gene18252	1220.81	1.25833	0.196985	6.38795	1.68127e-10	4.96541e-09	1959.7	1640.1	1886.82	854.558	828.507	648.724	727.264	CCDC97
gene18253	3538.64	1.18332	0.227049	5.21173	1.8709e-07	1.96513e-06	4274.07	5214.45	6118.14	2562.64	2544.77	1677.15	2379.29	HNRNPUL1
gene18260	8.6908	-3.73428	1.14127	-3.27203	0.00106778	0.00334451	0	3.09647	0	12.3999	12.6267	24.2363	8.47627	CXCL17
gene18261	206.824	1.04228	0.226425	4.6032	4.16053e-06	2.81875e-05	305.291	282.811	290.373	158.098	148.607	141.378	121.211	LIPE
gene18262	667.786	1.62138	0.263325	6.15734	7.39784e-10	1.76927e-08	1565.74	765.86	929.67	368.896	335.094	349.002	360.242	CNFN
gene18263	475.208	1.3792	0.254348	5.42252	5.87657e-08	7.36186e-07	576.91	908.297	713.384	350.296	270.017	296.49	211.059	MEGF8
gene18265	43.8394	2.36	0.546989	4.31453	1.59946e-05	8.98514e-05	161.625	34.0612	47.7979	17.5665	17.4831	9.69451	18.6478	PRR19
gene18267	1523.81	1.56314	0.239339	6.53106	6.53037e-11	2.15995e-09	2273.97	2695.99	2379.14	1132.52	799.368	779.6	606.053	CIC
gene18269	802.646	1.44084	0.219687	6.55859	5.43173e-11	1.832e-09	1535.43	1130.21	1101.74	495.995	511.868	381.317	461.957	ERF
gene18270	1408.62	1.26397	0.206093	6.13299	8.62441e-10	2.01472e-08	2312.13	1891.94	2135.37	1033.32	953.803	732.743	801.008	GSK3A
gene18271	228.168	1.53468	0.264134	5.81026	6.23768e-09	1.06804e-07	382.736	313.775	396.723	138.465	154.434	86.4427	124.601	ZNF526
gene18295	5289.37	1.7661	0.269187	6.56087	5.34947e-11	1.80782e-09	9634.62	7219.93	9743.61	2803.41	3199.42	1499.42	2925.16	LYPD3
gene18298	395.679	1.937	0.304687	6.35735	2.05269e-10	5.89932e-09	1002.3	436.602	615.399	171.532	202.027	131.684	210.212	ZNF575
gene18299	626.208	1.0189	0.240696	4.23314	2.30453e-05	0.000122918	1119.03	807.146	716.969	520.795	469.131	374.046	376.346	XRCC1
gene18304	954.018	1.35208	0.216492	6.24539	4.22734e-10	1.08867e-08	1334.52	1288.13	1763.74	638.594	642.02	501.691	509.424	IRGQ
gene18306	85.7362	1.12644	0.311355	3.61788	0.000297023	0.00111899	143.666	117.666	111.13	46.4995	77.7029	50.0883	53.4005	ZNF428
gene18308	237.719	1.05065	0.246817	4.25678	2.07391e-05	0.000112298	392.837	281.779	338.17	133.299	171.918	151.073	194.954	CADM4
gene18314	2258.9	2.1461	0.322271	6.6593	2.7514e-11	1.02727e-09	4517.63	3585.71	4048.49	630.327	1226.73	488.765	1314.67	LYPD5
gene1833	54.6235	-1.42417	0.449897	-3.16554	0.00154796	0.00461956	23.5702	29.9325	29.8737	111.599	77.7029	79.1718	30.5146	GABRR3
gene18333	227.725	1.2717	0.350823	3.62492	0.000289053	0.0010933	520.79	159.984	346.535	111.599	154.434	141.378	159.354	CBLC
gene18334	1962.24	2.0484	0.228694	8.95694	3.3381e-19	1.6309e-16	3839.7	2886.94	3660.13	886.591	991.683	602.675	867.97	BCAM
gene18338	1054.65	1.17421	0.259096	4.53194	5.84448e-06	3.76424e-05	1955.21	1271.62	1413.62	704.726	734.292	458.873	844.237	TOMM40
gene18340	3398.12	1.43733	0.392348	3.66341	0.000248883	0.000961683	6002.55	4142.04	5794.31	1590.28	3743.34	735.167	1779.17	APOE
gene18344	1474.46	1.92594	0.241748	7.96672	1.62943e-15	2.53303e-13	2579.26	2199.52	2860.71	731.593	832.392	454.026	663.692	CLPTM1
gene18347	206.584	1.36778	0.299511	4.5667	4.95463e-06	3.27941e-05	452.324	279.714	221.065	154.998	111.698	121.181	105.106	ZNF296
gene18350	1710.4	1.20042	0.261852	4.58432	4.5546e-06	3.04709e-05	3345.85	2309.97	1920.28	1501.42	957.688	1000.15	937.476	PPP1R37
gene18351	1071.27	1.12833	0.229539	4.91563	8.84964e-07	7.43996e-06	1787.97	1640.1	1229.6	824.592	601.226	811.915	603.511	NKPD1
gene18353	319.503	1.47089	0.270379	5.4401	5.32512e-08	6.73518e-07	518.545	436.602	554.456	184.965	240.879	117.142	183.935	BLOC1S3
gene18361	28.5091	1.77252	0.459197	3.86004	0.000113367	0.00049016	39.2837	52.64	51.3828	16.5332	15.5406	8.07876	16.1049	CKM
gene18362	1661.59	1.56813	0.275907	5.68353	1.31939e-08	2.02165e-07	3470.44	2060.18	2492.66	824.592	1017.91	590.557	1174.81	KLC3
gene18363	417.392	1.38085	0.247954	5.56899	2.56222e-08	3.57665e-07	683.537	739.024	509.048	320.33	228.252	242.363	199.192	ERCC2
gene18364	2895.8	1.09451	0.23308	4.69586	2.65489e-06	1.91475e-05	5516.56	3180.07	3782.01	2230.94	1907.61	1944.56	1708.82	PPP1R13L
gene18365	562.943	1.89304	0.278258	6.80316	1.02349e-11	4.51031e-10	901.281	874.236	1123.25	402.996	214.654	216.511	207.669	LOC106991561
gene18366	358.299	1.12004	0.301861	3.71047	0.000206877	0.000817562	764.349	437.634	352.51	197.365	275.845	193.89	286.498	CD3EAP
gene18370	31.1668	2.0216	0.695089	2.9084	0.00363279	0.00954675	20.2031	23.7396	120.69	9.29991	5.82772	29.0835	9.3239	FOSB
gene18371	105.149	1.13852	0.286061	3.98001	6.89122e-05	0.000317885	166.114	125.923	166.098	86.7991	67.99	64.6301	58.4863	RTN2
gene18373	1246.95	1.07681	0.261384	4.11963	3.79473e-05	0.00018957	2258.25	1429.54	1659.78	873.158	1111.15	588.134	808.636	VASP
gene18376	32.7813	1.35721	0.464367	2.92271	0.00347001	0.00918818	67.3435	53.6721	29.8737	21.6998	13.598	16.1575	27.1241	GPR4
gene18380	632.277	1.01493	0.292797	3.46633	0.00052761	0.00183265	1250.35	597.618	818.54	375.096	575.973	332.845	475.519	QPCTL
gene18383	288.86	1.07639	0.280968	3.83099	0.00012763	0.000543715	454.569	373.641	409.867	212.865	274.874	130.068	166.135	SIX5
gene18389	622.915	1.91202	0.24821	7.70324	1.32654e-14	1.45409e-12	1187.49	969.195	1062.31	288.297	371.031	193.89	288.193	IRF2BP1
gene18395	202.95	2.15382	0.389101	5.53538	3.10553e-08	4.19335e-07	352.431	324.097	415.842	94.0324	143.75	55.7434	34.7527	PGLYRP1
gene18401	1162.38	1.2996	0.229154	5.67129	1.4173e-08	2.15621e-07	2086.53	1436.76	1754.18	722.293	867.358	555.011	714.55	CCDC8
gene18404	3084.07	1.49565	0.286865	5.21377	1.85044e-07	1.94723e-06	6393.15	3766.34	4497.79	1757.68	2397.13	1059.13	1717.29	CALM3
gene18409	2002.45	1.06649	0.204149	5.22411	1.74998e-07	1.86795e-06	3013.62	2805.4	2744.8	1689.48	1331.63	1319.26	1112.93	STRN4
gene18411	1287.12	1.93617	0.238619	8.11406	4.89545e-16	8.8118e-14	2179.69	2327.51	2174.81	663.393	387.543	560.666	716.245	SLC1A5
gene18412	1430.05	1.05939	0.278988	3.79727	0.000146301	0.00060944	2753.23	1518.3	1833.05	848.358	1249.07	681.847	1126.5	AP2S1
gene18427	425.544	1.36616	0.242063	5.64381	1.6633e-08	2.48189e-07	815.979	576.975	569.99	267.631	272.931	193.89	281.412	KPTN
gene18428	2719.2	1.62121	0.252165	6.42915	1.28319e-10	3.88363e-09	5590.64	3306	4381.88	1474.55	1830.87	1068.82	1381.63	NAPA
gene18432	1748.27	1.10148	0.215022	5.12261	3.01329e-07	2.93938e-06	2386.21	2547.36	2613.35	1347.45	1390.88	1039.74	912.894	EHD2
gene18433	5070.64	1.32498	0.333283	3.97554	7.02194e-05	0.000323391	11482.1	4769.59	6913.97	2461.38	3861.83	1856.5	4149.13	GLTSCR2
gene18443	33.6599	-1.79891	0.597231	-3.01208	0.00259462	0.00715843	10.1015	28.9004	2.3899	53.7328	37.8802	67.8616	34.7527	CABP5
gene18444	683.849	1.38068	0.244162	5.65477	1.56055e-08	2.347e-07	1277.28	903.137	984.638	530.095	401.141	313.456	377.194	LIG1
gene18455	75.4938	1.6521	0.430811	3.83486	0.000125634	0.000536684	156.013	44.3827	170.878	36.1663	38.8514	35.5465	46.6195	SYNGR4
gene18456	1141.11	1.02743	0.254073	4.04386	5.25784e-05	0.000251283	1862.05	1306.71	1659.78	801.859	1060.64	554.203	742.521	KDELR1
gene18458	349.249	1.89679	0.26919	7.04627	1.83781e-12	1.03718e-10	730.677	525.368	543.702	164.298	187.458	104.216	189.021	GRWD1
gene18462	1702.95	1.2072	0.274414	4.39918	1.08659e-05	6.45165e-05	3753.28	1637	2166.44	1177.99	1090.75	967.027	1128.19	SULT2B1
gene18465	23290.7	1.04058	0.295872	3.51701	0.000436445	0.00155678	46905.9	23094.5	28917.8	13944.7	20576.7	10540.4	19054.7	RPL18
gene18472	46.071	1.13046	0.379975	2.97509	0.00292906	0.00794633	74.0779	70.1866	56.1626	20.6665	41.7653	28.2757	31.3622	MAMSTR
gene18475	365.919	1.24765	0.210024	5.94051	2.84134e-09	5.45921e-08	588.134	557.364	494.709	253.164	200.085	222.166	245.812	FUT1
gene18476	225.088	1.21223	0.321572	3.7697	0.000163444	0.000671202	409.673	367.448	223.455	125.032	93.2434	208.432	148.335	FGF21
gene18477	1350.48	1.10555	0.379594	2.91244	0.00358615	0.00944741	3609.61	842.239	1384.95	776.026	1093.67	794.142	952.733	BCAT2
gene18482	1230.7	1.8782	0.23133	8.11912	4.69565e-16	8.63394e-14	2224.58	1639.06	2458.01	547.661	708.067	465.336	572.148	PPP1R15A
gene18488	833.861	1.19733	0.241982	4.94802	7.49734e-07	6.41985e-06	1236.88	1098.21	1355.07	707.826	569.174	478.262	391.604	GYS1
gene18489	874.884	1.07191	0.232266	4.61503	3.93042e-06	2.68733e-05	1504.01	1182.85	1059.92	633.427	686.699	441.908	615.377	RUVBL2
gene18497	733.233	1.26975	0.248585	5.10793	3.2571e-07	3.13322e-06	1388.4	1017.71	898.601	565.228	393.371	506.538	362.784	PPFIA3
gene18512	406.36	1.43031	0.234261	6.10565	1.0238e-09	2.33844e-08	729.555	549.107	623.763	258.331	273.903	180.156	229.707	ALDH16A1
gene18518	509.507	1.11037	0.342155	3.24522	0.00117362	0.00362712	822.714	603.811	777.912	281.064	613.853	203.585	263.612	RCN3
gene18522	387.133	1.0264	0.331144	3.09957	0.00193799	0.00560075	782.308	388.091	467.225	212.865	416.682	183.388	259.374	RRAS
gene18523	1100.97	1.47931	0.237092	6.23937	4.39328e-10	1.12463e-08	2068.57	1528.62	1615.57	700.593	773.144	539.661	480.605	SCAF1
gene18526	1459.38	1.09952	0.285202	3.85522	0.000115624	0.000498403	2471.51	1900.2	1925.06	1014.72	1256.84	525.927	1121.41	PRMT1
gene18530	1143.51	1.44818	0.232682	6.22387	4.85024e-10	1.21612e-08	1657.77	1851.69	1866.51	864.891	700.297	506.538	556.891	AP2A1
gene18531	275.498	1.5361	0.329456	4.66254	3.12333e-06	2.20152e-05	620.683	349.901	350.12	129.165	239.908	109.871	128.839	LOC106991563
gene18532	199.64	1.02569	0.260051	3.94418	8.0074e-05	0.000362335	362.533	233.267	248.549	143.632	138.894	116.334	154.268	FUZ
gene18534	985.842	1.07901	0.217401	4.96321	6.93364e-07	5.99945e-06	1589.31	1372.77	1267.84	791.525	729.436	624.488	525.529	MED25
gene18536	359.846	1.2638	0.22298	5.6678	1.44645e-08	2.19471e-07	608.337	554.268	456.47	265.564	206.884	202.777	224.621	PNKP
gene18537	761.191	1.04883	0.23849	4.3978	1.09352e-05	6.47481e-05	1294.12	871.14	1074.26	615.86	595.398	407.977	469.585	AKT1S1
gene18538	830.674	1.31083	0.217929	6.01496	1.79936e-09	3.73865e-08	1436.66	1043.51	1301.3	613.794	514.782	442.716	461.957	TBC1D17
gene18542	690.662	1.01344	0.264994	3.82441	0.000131087	0.000554628	1301.98	768.956	840.049	599.327	512.839	355.465	456.023	ATF5
gene18550	6513.33	1.67026	0.238946	6.99011	2.74667e-12	1.47432e-10	13706.7	8613.34	9811.72	4282.09	2968.25	3431.86	2779.37	MYH14
gene18554	1005.6	1.28055	0.214416	5.97226	2.33991e-09	4.66345e-08	1761.03	1264.39	1518.78	704.726	681.843	522.696	585.71	NR1H2
gene18555	431.461	1.45306	0.217166	6.691	2.21654e-11	8.55593e-10	718.331	734.895	577.16	275.897	267.104	238.323	208.516	POLD1
gene18559	777.137	1.68774	0.312801	5.39558	6.83037e-08	8.31312e-07	1341.26	1035.25	1470.98	316.197	513.81	214.895	547.567	EMC10
gene18567	147.807	1.78191	0.506597	3.51742	0.000435767	0.00155534	203.153	169.274	372.824	47.5329	164.147	22.6205	55.0958	CLEC11A
gene18579	2020.04	1.25571	0.23221	5.40767	6.38516e-08	7.87211e-07	3752.16	2490.59	2830.83	1195.55	1423.91	979.145	1468.09	KLK5
gene18584	16924	2.05488	0.210785	9.74874	1.86765e-22	1.99605e-19	32170	25374.5	32142.9	6734.17	8878.52	5878.91	7288.75	KLK10
gene18588	264.599	1.30422	0.282413	4.61815	3.87181e-06	2.64938e-05	312.025	338.547	552.066	164.298	197.171	122.797	165.287	LOC101120106
gene18589	177.815	1.10209	0.308971	3.56697	0.000361138	0.00132635	331.106	195.078	241.38	112.632	156.377	76.7482	131.382	LOC105602080
gene18599	138.904	1.31889	0.294381	4.48023	7.45638e-06	4.64665e-05	236.825	156.888	240.185	64.066	106.841	75.1324	92.3914	IGLON5
gene18600	414.844	1.01714	0.269004	3.78114	0.000156109	0.000644797	501.709	751.41	497.099	366.83	202.027	276.293	308.536	VSIG10L
gene18601	2530.46	1.13904	0.308591	3.69109	0.000223299	0.000873778	5544.62	2392.54	3096.11	1525.18	2071.75	1116.48	1966.49	ETFB
gene18610	547.237	-1.01154	0.238331	-4.24428	2.19297e-05	0.000117887	249.171	396.348	393.138	749.159	578.886	721.433	742.521	ZNF175
gene1862	807.012	1.06657	0.236583	4.50822	6.53739e-06	4.14034e-05	1059.54	1054.86	1337.15	514.595	663.388	399.091	620.463	CPOX
gene18631	3737.34	1.58744	0.25526	6.21893	5.00553e-10	1.24956e-08	7341.57	4812.94	5966.38	1959.18	2553.51	1343.5	2184.34	PPP2R1A
gene18644	524.968	-1.17756	0.191912	-6.13595	8.46513e-10	1.98293e-08	327.739	282.811	304.712	694.393	648.819	690.734	725.569	LOC105601988
gene18656	24.3126	-1.66838	0.528755	-3.1553	0.00160333	0.00476899	16.8359	6.19294	9.55959	36.1663	33.995	42.0095	25.4288	LOC105601991
gene18698	1386.99	1.6816	0.310352	5.41838	6.01399e-08	7.50652e-07	2693.74	2011.67	2152.1	706.793	1168.46	436.253	539.938	MYADM
gene18707	1653.59	1.63332	0.235805	6.92658	4.31145e-12	2.16204e-10	3281.88	2244.94	2567.94	1066.39	970.315	685.886	757.779	EPN1
gene18708	2785.24	1.22268	0.223695	5.46583	4.60737e-08	5.906e-07	5003.63	3806.59	3596.8	2060.45	1977.54	1374.2	1677.45	U2AF2
gene18710	73.6094	1.13907	0.322627	3.5306	0.000414618	0.00148949	134.687	92.8941	93.206	45.4662	61.191	41.2017	46.6195	ZNF581
gene18713	472.942	1.34896	0.306282	4.40431	1.06122e-05	6.32075e-05	1052.8	458.277	662.002	239.731	372.974	221.358	303.451	ZNF524
gene18714	384.142	1.06923	0.224596	4.76069	1.92931e-06	1.44444e-05	591.501	519.175	532.947	333.763	236.994	242.363	232.25	FIZ1
gene18718	143.134	1.23907	0.301996	4.10294	4.07934e-05	0.000201726	219.989	226.042	193.582	107.466	116.554	83.2112	55.0958	SSC5D
gene18719	194.553	1.36048	0.287003	4.7403	2.13403e-06	1.57837e-05	415.285	236.364	244.964	92.9991	131.124	112.295	128.839	ZNF628
gene18720	485.392	1.01267	0.328382	3.08381	0.00204367	0.00586159	887.812	515.046	642.882	228.364	521.581	218.934	383.127	ISOC2
gene18734	1356.04	1.39648	0.239186	5.83848	5.26787e-09	9.32511e-08	1958.57	2408.02	1933.43	1076.72	764.402	756.98	594.187	PPP6R1
gene18740	114.42	1.1703	0.369997	3.16301	0.00156149	0.00465506	133.565	250.814	118.3	81.6325	62.1623	47.6647	106.801	TNNT1
gene18743	331.411	1.14055	0.25951	4.39502	1.10762e-05	6.54465e-05	523.035	450.02	472.005	288.297	186.487	155.92	244.117	RDH13
gene1876	391.13	-1.35432	0.282455	-4.79483	1.62814e-06	1.25298e-05	232.335	258.039	130.249	446.396	442.906	659.227	568.758	LNP1
gene18765	31.0252	1.32155	0.440891	2.99746	0.0027224	0.00746066	37.039	41.2862	63.3323	15.4998	25.2534	16.9654	17.8002	TTYH1
gene18773	15534.7	1.01696	0.33186	3.06444	0.00218081	0.00619161	33332.8	14576.1	17643.4	8083.69	14170.1	6862.1	14074.8	RPS9
gene18775	3148.04	1.55326	0.343556	4.52113	6.15118e-06	3.92922e-05	8659.26	2488.53	4004.27	1942.65	1995.99	1496.99	1448.59	MBOAT7
gene18777	219.22	1.24344	0.301591	4.12292	3.74098e-05	0.000187323	456.814	210.56	314.271	135.365	158.32	106.64	152.573	LENG1
gene18779	732.384	1.66015	0.275448	6.02711	1.66919e-09	3.52819e-08	1617.37	913.458	1074.26	412.296	448.734	252.865	407.709	PRPF31
gene1879	29.6116	-1.70554	0.485764	-3.51105	0.000446341	0.00158778	14.5911	13.418	10.7545	43.3996	26.2247	57.3592	41.5337	ADGRG7
gene18793	187.383	1.1792	0.242994	4.85278	1.2174e-06	9.72781e-06	318.759	258.039	248.549	115.732	144.722	112.295	113.582	ZNF787
gene18831	480.175	-1.18217	0.262291	-4.50709	6.57227e-06	4.1609e-05	270.497	357.126	206.726	760.526	516.724	719.009	530.615	LOC101113523
gene1884	515.201	-1.77651	0.355052	-5.00351	5.62971e-07	5.03757e-06	143.666	384.994	118.3	594.161	767.316	736.783	861.189	IMPG2
gene18844	168.288	-1.01239	0.287079	-3.52651	0.000421079	0.00150984	96.5257	109.409	113.52	233.531	139.865	269.023	216.145	LOC101106962
gene18847	14621.4	-1.13074	0.253166	-4.46639	7.95488e-06	4.9161e-05	10092.6	6274.48	9746	13822.8	18201.9	19723.5	24488.8	LOC101107216
gene1885	2132.53	-1.50484	0.219831	-6.84543	7.6246e-12	3.5143e-10	901.281	1228.27	990.612	2439.68	2975.05	2721.73	3671.07	SENP7
gene1886	290.886	-1.38332	0.28632	-4.83139	1.35582e-06	1.06939e-05	94.281	209.528	150.564	354.43	378.802	376.47	472.128	LOC101109587
gene18870	77.6796	-1.51854	0.334108	-4.54506	5.492e-06	3.57492e-05	44.8957	41.2862	26.2889	132.265	100.042	90.4821	108.496	C14H19orf18
gene18879	17.3664	2.34372	0.704629	3.32618	0.000880463	0.00284342	31.427	27.8682	37.0434	0	13.598	4.84725	6.78102	RNF225
gene18885	129.284	1.3975	0.324073	4.3123	1.61563e-05	9.06704e-05	276.109	177.531	146.979	66.1327	106.841	68.6694	62.7244	ZBTB45
gene18887	3888.22	1.4929	0.222267	6.71671	1.85867e-11	7.47439e-10	7451.56	5349.67	5666.45	2440.71	2561.28	1729.66	2018.2	TRIM28
gene18888	2131.61	1.2221	0.288364	4.23804	2.25481e-05	0.000120605	4277.44	2334.74	2882.22	1296.82	1712.38	838.575	1579.13	CHMP2A
gene18889	1304.6	1.07129	0.301493	3.55327	0.000380472	0.00138633	2795.88	1236.52	1554.63	798.759	1044.13	632.567	1069.71	UBE2M
gene18891	140.231	1.2787	0.294951	4.33531	1.45553e-05	8.29101e-05	189.684	213.656	229.43	105.399	110.727	58.9749	73.7436	LOC105602113
gene18894	5.47648	-5.54945	1.51701	-3.65816	0.000254036	0.000979044	0	0	0	8.26658	9.71286	16.9654	3.39051	LOC101115227
gene1891	42697.9	-1.01257	0.322603	-3.13876	0.00169665	0.00500392	38528.4	19268.3	23202.3	30655.6	55002.9	50750.8	81477.3	RPL24
gene18917	885.629	-1.36941	0.198838	-6.88706	5.69581e-12	2.75137e-10	500.587	451.052	443.326	1032.29	1138.35	1253.02	1380.78	KBTBD3
gene18925	1071.31	-1.19027	0.225253	-5.28414	1.26298e-07	1.40789e-06	698.128	558.397	598.669	1103.59	1748.31	1274.83	1517.25	LOC101117272
gene18927	4149.17	-1.35569	0.222534	-6.09206	1.1147e-09	2.52468e-08	2444.57	1891.94	2246.5	4163.26	6765.98	6116.43	5415.49	PDGFD
gene18930	1224.9	-1.16483	0.239045	-4.87286	1.09991e-06	8.93518e-06	677.925	823.661	647.662	1173.85	1504.52	1650.49	2096.18	DYNC2H1
gene18943	94.0153	-1.43682	0.348671	-4.12083	3.77502e-05	0.000188751	43.7733	62.9615	35.8485	82.6658	130.152	135.723	166.983	LOC105601931
gene18954	490.668	-1.51392	0.283315	-5.34359	9.11239e-08	1.0628e-06	190.807	328.226	194.777	607.594	782.856	489.573	840.846	CEP126
gene18957	515.708	-1.51775	0.3643	-4.16621	3.097e-05	0.000158702	149.278	411.83	187.607	505.295	1074.24	756.172	525.529	TRPC6
gene18959	3430.81	-1.9131	0.207689	-9.21136	3.22008e-20	1.72073e-17	1287.38	1546.17	1154.32	4811.15	4265.89	6041.29	4909.46	ARHGAP42
gene18962	3941.89	-2.33197	0.295378	-7.89486	2.9064e-15	4.10739e-13	1817.15	861.85	898.601	4548.69	5264.37	7602.11	6600.47	CNTN5
gene18976	11603.5	-2.19342	0.251828	-8.71002	3.03827e-18	1.15454e-15	4211.22	4834.62	2395.87	16243.8	15906.7	20063.6	17568.8	MAML2
gene18986	4194.23	1.10258	0.211109	5.22283	1.76214e-07	1.87859e-06	5876.85	5123.62	7112.33	3236.37	2691.43	2288.71	3030.27	ENDOD1
gene18994	56.3517	1.17244	0.346169	3.38689	0.000706886	0.00235675	79.6899	80.5082	87.2312	43.3996	45.6504	27.4678	30.5146	FUT4
gene18997	177.335	-2.58779	0.341503	-7.57764	3.51891e-14	3.41894e-12	42.6509	30.9647	64.5272	231.464	406.969	252.865	211.907	GUCY1A2
gene18998	626.275	-1.45538	0.229713	-6.33566	2.36332e-10	6.69087e-09	282.843	355.062	303.517	675.793	870.272	820.802	1075.64	ALKBH8
gene19003	3164.86	-1.12996	0.221162	-5.10918	3.23557e-07	3.11708e-06	1755.42	1778.41	2121.03	3097.9	4398.95	3900.42	5101.87	CUL5
gene19007	1429.63	-1.29716	0.241036	-5.38161	7.38232e-08	8.90252e-07	597.113	950.616	792.251	1576.85	1691.01	1973.64	2425.91	ATM
gene19008	15354.3	2.61541	0.278105	9.40438	5.23375e-21	3.89118e-18	24591.6	25455	38226.4	5554.11	4811.75	5991.21	2849.72	C15H11orf65
gene19010	2521.45	-1.08742	0.293436	-3.70583	0.000210703	0.000831145	2123.57	1567.85	912.941	2262.98	3437.38	3360.76	3984.7	DDX10
gene19020	648.863	-1.81021	0.253576	-7.13874	9.41875e-13	5.92134e-11	248.049	351.965	199.556	785.325	1078.13	1054.28	824.741	ARHGAP20
gene19039	3505.66	1.42768	0.316033	4.5175	6.25739e-06	3.98664e-05	6673.75	4634.38	5098.85	2124.51	2607.9	921.786	2478.46	CRYAB
gene19048	327.045	-1.39201	0.323164	-4.30745	1.65149e-05	9.23498e-05	99.8929	259.071	149.369	522.861	314.697	447.563	495.862	SDHD
gene1905	1510.96	-1.14499	0.260953	-4.38773	1.1454e-05	6.73749e-05	677.925	1136.4	863.948	1445.62	2626.36	1941.33	1885.12	CBLB
gene19057	4279.49	1.13751	0.235785	4.82435	1.40462e-06	1.1033e-05	7655.84	4438.27	6557.88	2906.74	3219.81	2279.02	2898.88	LOC101112509
gene19075	2464.68	-1.51281	0.27163	-5.56938	2.55653e-08	3.57163e-07	1575.84	1304.65	709.799	2796.17	3724.88	3855.99	3285.4	ZBTB16
gene19089	61.0619	1.51129	0.387942	3.89566	9.79305e-05	0.000430935	113.362	84.6368	93.206	25.8331	50.5069	40.3938	19.4954	NXPE2
gene19091	4993.12	-1.16892	0.197189	-5.92792	3.06794e-09	5.84207e-08	3271.77	3060.34	2410.21	5599.58	6743.64	6839.48	7026.83	CADM1
gene19106	4878.91	-1.08967	0.228832	-4.76187	1.91808e-06	1.4371e-05	3151.68	3525.85	2221.41	5141.81	6069.57	7539.9	6502.15	SIK3
gene19108	2183.87	1.36208	0.247721	5.49845	3.83148e-08	5.03213e-07	3048.42	3226.52	3790.38	1872.38	1017.91	1229.59	1101.92	SIDT2
gene19110	7900.4	1.64918	0.32752	5.03534	4.76994e-07	4.36415e-06	17154.6	9797.23	11853.9	3703.43	6818.43	2321.03	3654.12	TAGLN
gene19112	1180.39	1.09293	0.212345	5.14698	2.64718e-07	2.64254e-06	1734.1	1527.59	1822.3	1005.42	730.407	770.713	672.168	PCSK7
gene19117	7618.89	1.19953	0.255345	4.69769	2.63118e-06	1.89925e-05	15018.7	7862.97	10860.9	4727.45	5746.13	3776.01	5340.05	LOC443411
gene19119	622.56	1.2681	0.28583	4.43656	9.14086e-06	5.5409e-05	950.666	583.168	1271.43	432.962	329.266	318.303	472.128	TMPRSS13
gene19120	144.29	1.1075	0.323291	3.42569	0.000613231	0.00208433	131.32	228.107	264.084	135.365	87.4157	83.2112	80.5246	IL10RA
gene19124	497.076	-1.1595	0.223571	-5.18628	2.14536e-07	2.21132e-06	285.088	317.904	271.253	796.692	550.719	689.118	568.758	JAML
gene19143	1885.49	1.26144	0.233716	5.39731	6.76467e-08	8.25666e-07	2999.03	2711.47	2769.89	1509.68	1313.18	1052.66	842.541	BCL9L
gene19151	1146.67	1.38482	0.219895	6.29765	3.022e-10	8.22064e-09	1710.53	1805.24	1797.2	895.891	565.288	660.034	592.491	HYOU1
gene19154	612.693	1.18693	0.258511	4.59142	4.40237e-06	2.95964e-05	1029.23	782.374	892.627	421.596	490.499	251.249	421.271	LOC101106791
gene19159	817.325	1.05426	0.239959	4.39347	1.11554e-05	6.58465e-05	1248.1	932.037	1303.69	670.627	605.111	558.242	403.471	NLRX1
gene19163	336.131	1.54093	0.319164	4.82802	1.37899e-06	1.08517e-05	331.106	555.3	726.529	234.564	221.453	120.373	163.592	MCAM
gene19164	497.411	1.59222	0.251198	6.33852	2.31977e-10	6.58939e-09	851.896	696.705	865.143	290.364	304.012	173.693	300.06	RNF26
gene19165	110.35	1.25767	0.372345	3.37771	0.00073093	0.00242697	194.174	111.473	189.997	66.1327	103.928	35.5465	71.2007	C1QTNF5
gene19167	1227.92	1.05909	0.213484	4.96098	7.0137e-07	6.06341e-06	2048.37	1345.93	1847.39	880.391	792.569	913.707	767.103	USP2
gene19169	1780.88	1.71266	0.291611	5.87311	4.27695e-09	7.8304e-08	3606.25	2248.04	3006.49	876.258	1360.77	579.247	789.141	THY1
gene19171	920.635	1.16208	0.258127	4.50197	6.73278e-06	4.24366e-05	883.323	1453.28	1701.61	720.226	510.896	613.986	561.129	PVRL1
gene19173	14486.3	1.7437	0.240417	7.25283	4.08161e-13	2.93258e-11	29094.7	19503.6	23928.8	8116.75	8438.53	5005.6	7315.87	TRIM29
gene19192	680.29	-1.26442	0.227319	-5.56233	2.66189e-08	3.69467e-07	312.025	457.245	363.264	914.491	1006.25	983.185	725.569	UBASH3B
gene19208	2237.41	-1.56606	0.313048	-5.00262	5.65559e-07	5.05544e-06	1133.62	1494.56	536.532	3191.93	2339.83	3935.16	3030.27	SERGEF
gene1921	58.2801	-1.85583	0.378223	-4.9067	9.26222e-07	7.72502e-06	14.5911	26.8361	28.6788	80.5992	69.9326	103.408	83.9151	HHLA2
gene19225	622.405	-1.51653	0.297414	-5.09906	3.41338e-07	3.25901e-06	353.554	324.097	227.04	532.161	1191.77	725.472	1002.74	SOX6
gene19238	213.715	-1.07968	0.3021	-3.57392	0.000351678	0.00129633	98.7705	165.145	127.859	169.465	322.467	303.761	308.536	PDE3B
gene19255	296.175	1.50675	0.293869	5.12729	2.93946e-07	2.88051e-06	620.683	346.804	443.326	148.799	235.051	126.836	151.725	RASSF10
gene19265	282.358	-1.19535	0.276689	-4.3202	1.55887e-05	8.79759e-05	129.075	230.171	127.859	300.697	411.825	386.972	389.908	LOC106991619
gene19276	4952.72	-1.5101	0.197291	-7.65418	1.94546e-14	2.0285e-12	2298.66	2801.27	2125.81	5739.08	7065.13	7430.03	7209.07	SBF2
gene1928	28.5118	-2.27187	0.575209	-3.94964	7.82704e-05	0.000355114	7.85675	7.22509	11.9495	22.7331	34.9663	77.5561	37.2956	MORC1
gene19304	4254.38	1.0963	0.276218	3.96895	7.21897e-05	0.00033095	8470.7	4197.78	5673.62	2557.47	3539.37	2101.28	3240.48	EIF3F
gene19330	463.888	1.06884	0.292725	3.65134	0.000260874	0.00100097	471.405	883.526	629.738	321.363	437.079	280.333	223.774	OLFML1
gene19336	498.875	-1.00027	0.20926	-4.78002	1.75275e-06	1.33328e-05	271.619	342.676	338.17	566.261	595.398	693.965	684.035	ZNF214
gene19354	9.75991	2.85504	0.982333	2.90638	0.00365633	0.00959828	4.48957	10.3216	43.0181	3.09997	0	4.84725	2.54288	LOC101115567
gene19361	448.653	1.25022	0.276845	4.51597	6.30283e-06	4.0111e-05	511.811	771.021	728.919	330.663	364.232	242.363	191.564	DCHS1
gene19362	1028.95	1.24663	0.216395	5.76092	8.3657e-09	1.36632e-07	1343.5	1436.76	1830.66	726.426	723.608	534.814	606.901	TPP1
gene19364	1306.05	1.13294	0.246745	4.59156	4.39953e-06	2.95956e-05	2069.69	1639.06	1976.44	851.458	1086.87	571.168	947.647	ILK
gene19366	125.52	-1.24891	0.304879	-4.09642	4.19594e-05	0.000206764	88.669	75.3474	46.603	150.865	147.635	207.624	161.897	DNHD1
gene19373	1700.19	2.14904	0.29411	7.30694	2.73291e-13	2.09324e-11	4153.97	1849.62	3146.3	789.459	870.272	517.848	573.844	SMPD1
gene19374	1164.94	1.11411	0.319554	3.48643	0.000489505	0.00171774	2213.36	1245.81	1586.89	628.26	1114.06	434.637	931.542	PRKCDBP
gene19379	107.221	-1.41145	0.349747	-4.03564	5.44533e-05	0.000259085	58.3644	68.1223	38.2384	168.432	141.808	187.427	88.1532	LOC101119417
gene1940	1016.75	-1.46601	0.222088	-6.60101	4.08357e-11	1.43092e-09	405.184	540.85	573.575	1513.82	1414.19	1110.02	1559.63	PVRL3
gene1943	65.5441	-1.5786	0.469397	-3.36305	0.000770869	0.00253937	11.2239	31.9968	48.9929	65.0993	142.779	64.6301	94.0866	CD96
gene19430	16.0189	-2.21597	0.651685	-3.40037	0.000672954	0.00226129	7.85675	4.12862	3.58485	26.8664	21.3683	16.9654	31.3622	LOC101118897
gene1954	11.2522	-2.39108	0.822869	-2.90579	0.00366328	0.00961211	3.36718	5.16078	1.19495	18.5998	19.4257	24.2363	6.78102	SLC9C1
gene19594	1053.39	1.7157	0.306928	5.5899	2.27204e-08	3.22422e-07	2185.3	1280.91	1778.08	470.162	789.655	311.032	558.586	RHOG
gene19607	6882.51	1.26411	0.204427	6.18365	6.26356e-10	1.53229e-08	11349.6	9388.49	10240.7	5127.35	4429.06	4252.66	3389.66	NUMA1
gene19609	1197.31	1.17781	0.306957	3.83705	0.000124521	0.000532727	2333.45	1218.98	1720.73	657.193	1049.96	470.992	929.847	LAMTOR1
gene1961	15889.9	1.57031	0.363757	4.31693	1.58216e-05	8.90918e-05	24803.8	22490.7	29468.6	6932.56	16937.3	4756.77	5839.3	CCDC80
gene19616	1414.77	1.07754	0.230392	4.67699	2.91113e-06	2.06729e-05	1991.12	2174.75	1902.36	1292.69	864.444	935.52	742.521	INPPL1
gene19624	1246.93	-1.11378	0.231069	-4.8201	1.4349e-06	1.12502e-05	600.48	992.934	652.442	1479.72	1731.8	1771.67	1499.45	FCHSD2
gene19631	1280.23	-1.58393	0.246903	-6.41519	1.40643e-10	4.23416e-09	527.524	788.567	476.784	1474.55	1665.76	2245.89	1782.56	FAM168A
gene19639	147.074	1.29312	0.40041	3.2295	0.00124008	0.00380774	205.398	183.724	277.228	76.4659	171.918	44.4332	70.3531	UCP2
gene19645	195.071	-1.03957	0.353865	-2.93777	0.00330586	0.00882045	63.9764	158.952	142.199	148.799	251.563	277.909	322.098	PGM2L1
gene19670	5637.45	1.29928	0.286224	4.53939	5.64177e-06	3.655e-05	7988.07	8060.11	9546.44	3518.46	5174.04	1976.06	3198.94	SERPINH1
gene19683	1876.65	1.69828	0.253149	6.70861	1.96483e-11	7.75949e-10	2858.73	2622.71	3829.81	966.157	785.77	756.98	1316.36	DGAT2
gene19684	2634.29	-1.34366	0.212509	-6.32286	2.5677e-10	7.17444e-09	1317.69	1650.42	1237.97	2928.44	3300.43	4200.95	3804.15	UVRAG
gene1969	1354.75	-1.16674	0.252368	-4.62318	3.77905e-06	2.5943e-05	781.185	1013.58	579.55	1673.98	1496.75	2322.64	1615.58	CFAP44
gene19692	214.682	-1.21533	0.342584	-3.54754	0.000388847	0.00141114	115.606	190.949	59.7474	280.031	241.85	343.347	271.241	LOC105602314
gene19695	175.49	1.16206	0.255718	4.54433	5.51107e-06	3.58324e-05	208.765	279.714	280.813	137.432	113.64	95.3293	112.734	LRRC32
gene19697	875.057	1.10106	0.226961	4.85129	1.22659e-06	9.79668e-06	1394.01	1128.15	1254.7	616.894	746.919	521.08	463.652	TSKU
gene19698	4826.81	-1.39836	0.229675	-6.08842	1.14033e-09	2.57074e-08	2860.98	2608.26	2014.68	4973.38	6380.38	8191.86	6758.13	ACER3
gene1970	186.757	-1.11739	0.235763	-4.73946	2.14288e-06	1.58354e-05	125.708	99.087	111.13	237.664	266.132	230.245	237.336	SIDT1
gene19700	47.4018	-2.63401	0.514048	-5.12405	2.99036e-07	2.92201e-06	13.4687	9.28941	13.1444	85.7658	26.2247	86.4427	97.4771	B3GNT6
gene19701	379.239	1.723	0.237007	7.26983	3.59947e-13	2.64167e-11	520.79	686.384	683.511	215.964	186.487	214.895	146.639	CAPN5
gene19707	691.528	-1.32163	0.20479	-6.45361	1.09215e-10	3.38329e-09	358.043	342.676	417.037	830.792	961.573	1074.47	856.103	ANO3
gene19711	1003.08	-1.03483	0.246031	-4.20612	2.59793e-05	0.000136146	799.143	560.461	522.193	1025.06	1134.46	1360.46	1619.82	BBOX1
gene19718	543.314	-1.5837	0.288669	-5.48622	4.10634e-08	5.35609e-07	272.741	274.554	213.896	478.429	697.383	746.477	1119.72	KIF18A
gene19719	1568.49	-1.61554	0.217444	-7.42966	1.0888e-13	9.35598e-12	764.349	773.085	621.373	1660.55	2238.81	2447.06	2474.22	METTL15
gene19726	247.538	-1.69542	0.250497	-6.76824	1.30362e-11	5.47507e-10	103.26	129.02	93.206	290.364	402.112	391.012	323.794	MPPED2
gene19729	1934.03	-1.3386	0.244776	-5.46868	4.53409e-08	5.83591e-07	1273.92	1144.66	677.536	2450.01	2336.91	2949.55	2705.63	DNAJC24
gene19730	1750.29	-1.06691	0.213329	-5.00125	5.69593e-07	5.08353e-06	1046.07	1184.92	998.977	1877.55	2043.59	2241.86	2859.05	IMMP1L
gene19731	1180.67	-1.15515	0.253543	-4.55601	5.21344e-06	3.41832e-05	730.677	851.529	499.489	1121.16	1703.64	1552.74	1805.45	ELP4
gene19735	86.1514	-1.27087	0.356309	-3.56677	0.000361405	0.00132676	57.242	55.7364	29.8737	87.8324	99.0712	113.103	160.202	LOC105602333
gene19745	2916.05	-1.09807	0.207862	-5.28269	1.27302e-07	1.41723e-06	1937.25	1865.11	1493.69	3120.64	3558.79	3970.71	4466.15	CSTF3
gene19764	2548.96	-1.0992	0.257359	-4.27108	1.94525e-05	0.000106376	1431.05	2025.09	1169.85	4113.66	2604.02	3732.39	2766.65	ABTB2
gene19788	1256.73	-1.29276	0.211944	-6.09951	1.06394e-09	2.41292e-08	818.224	660.58	583.135	1431.15	1590	1832.26	1881.73	C15H11orf74
gene19792	755.889	-1.4082	0.269315	-5.22882	1.70592e-07	1.82892e-06	465.793	428.345	271.253	818.392	1365.63	1087.4	854.408	LRRC4C
gene19812	170.849	-1.03602	0.321898	-3.21847	0.00128877	0.00393887	86.4242	165.145	68.1121	207.698	229.223	252.865	186.478	ALX4
gene19813	3449.54	1.30792	0.272898	4.79272	1.64535e-06	1.26224e-05	6801.7	4152.36	4740.36	1777.32	2880.83	1476.8	2317.41	CD82
gene19815	726.45	1.22454	0.226969	5.39516	6.84614e-08	8.32638e-07	1002.3	1068.28	1166.27	575.561	498.27	349.81	424.661	TP53I11
gene19818	94.0437	1.2988	0.364071	3.56744	0.000360481	0.00132479	88.669	190.949	146.979	69.2326	63.1336	65.4379	33.9051	LOC105602425
gene1982	4211.37	-1.26808	0.257996	-4.91511	8.87339e-07	7.4526e-06	2452.43	2517.43	2030.22	3849.13	8010.19	5713.3	4906.91	ZBTB20
gene19824	337.301	2.37084	0.285342	8.30877	9.66992e-17	2.13784e-14	560.074	541.882	774.327	150.865	155.406	92.0978	86.458	CHST1
gene19826	240.681	1.61556	0.232588	6.94601	3.75759e-12	1.9238e-10	389.47	394.284	389.553	159.132	119.468	108.255	124.601	SLC35C1
gene19828	197.65	1.28418	0.266915	4.8112	1.50029e-06	1.16612e-05	358.043	248.75	286.788	153.965	118.497	92.9057	124.601	MAPK8IP1
gene19832	3686.06	-1.28031	0.215444	-5.94267	2.80408e-09	5.41806e-08	2020.31	2452.4	1614.38	4110.56	5104.11	5592.92	4907.76	PHF21A
gene19833	545.485	1.41148	0.322942	4.37068	1.23863e-05	7.2067e-05	575.787	983.645	983.443	353.396	462.332	285.18	174.611	CREB3L1
gene19842	431.855	1.10659	0.234259	4.72379	2.3149e-06	1.6931e-05	775.573	483.049	608.229	332.73	270.017	277.909	275.479	ZNF408
gene19847	1274.57	1.17158	0.219101	5.34719	8.93323e-08	1.04701e-06	2062.96	1762.92	1778.08	1057.09	699.326	701.236	860.342	ARFGAP2
gene19848	1247	1.15388	0.243519	4.73837	2.15445e-06	1.59004e-05	2445.69	1372.77	1639.47	953.757	845.019	740.822	731.502	PACSIN3
gene19857	60.928	-1.40973	0.471847	-2.98768	0.00281105	0.00767017	26.9374	55.7364	10.7545	88.8658	76.7316	110.679	56.791	LOC106991627
gene19859	4260.13	1.04249	0.31597	3.29935	0.000969096	0.00307964	8425.8	4181.26	5495.57	2464.48	3766.65	1696.54	3790.59	PSMC3
gene1988	799.982	-2.79585	0.340893	-8.20153	2.37353e-16	4.71946e-14	168.359	262.168	114.715	767.759	1901.78	1380.66	1004.44	LSAMP
gene19969	22.442	-2.16506	0.623348	-3.47328	0.000514142	0.00179388	10.1015	3.09647	9.55959	18.5998	22.3396	48.4725	44.9242	LOC106991629
gene19978	71.3406	1.74187	0.526069	3.3111	0.000929314	0.00297144	93.1586	111.473	151.758	61.9994	53.4207	8.07876	19.4954	APLNR
gene19979	5889.47	1.20556	0.250942	4.80412	1.55431e-06	1.2032e-05	10904	8457.49	6761.02	4940.32	3838.52	3550.61	2774.28	TNKS1BP1
gene19980	3288.61	1.65313	0.225242	7.33933	2.14659e-13	1.69938e-11	5894.81	4990.48	5280.48	1878.58	2091.18	1217.47	1667.28	SSRP1
gene19985	470.073	1.13642	0.238373	4.76741	1.86607e-06	1.40633e-05	613.949	697.738	736.088	409.196	259.333	319.919	254.288	SLC43A3
gene19993	1722.04	1.70962	0.26874	6.36163	1.9963e-10	5.76633e-09	2981.07	2448.27	3133.16	952.724	1239.36	580.055	719.635	SERPING1
gene19996	2619.46	1.28073	0.211377	6.05898	1.36984e-09	2.98018e-08	4248.26	3501.07	4089.11	2084.21	1506.46	1503.46	1403.67	ZDHHC5
gene20047	7598.16	1.44721	0.229782	6.2982	3.01117e-10	8.22064e-09	12763.8	12678	10278.9	4259.36	4486.37	5576.77	3143.85	GLYATL2
gene20050	292.556	1.34395	0.410157	3.27666	0.00105041	0.00329942	217.744	332.354	792.251	230.431	235.051	134.107	105.953	LOC101109907
gene2009	693.556	-1.27778	0.336891	-3.79287	0.000148916	0.000618976	600.48	307.583	238.99	704.726	718.752	912.9	1371.46	LOC101107153
gene20090	15.2829	-2.57944	0.774877	-3.32883	0.000872111	0.00282231	1.12239	8.25725	2.3899	9.29991	28.1673	32.315	25.4288	MS4A5
gene20092	15.5728	-1.95087	0.629661	-3.09828	0.00194649	0.00562245	5.61196	7.22509	4.77979	26.8664	20.397	16.1575	27.9717	MS4A1
gene2010	307.748	-1.47249	0.210109	-7.0082	2.41401e-12	1.31883e-10	163.869	147.598	146.979	402.996	418.624	459.681	414.49	MAATS1
gene20126	7.95671	2.58633	0.884566	2.92384	0.00345747	0.00916481	19.0807	14.4502	11.9495	3.09997	3.88514	3.2315	0	FOXI1
gene20137	1353.62	-1.77822	0.247917	-7.17265	7.35604e-13	4.91361e-11	572.42	701.866	425.402	1436.32	1882.35	2218.43	2238.58	RANBP17
gene2014	438.003	-1.37211	0.324837	-4.224	2.40004e-05	0.000127347	188.562	292.1	207.921	410.229	805.196	794.142	367.87	LRRC58
gene20163	14.1868	2.56537	0.879424	2.9171	0.00353302	0.00932757	23.5702	23.7396	33.4586	4.13329	13.598	0.807876	0	LOC105602461
gene20170	1349.87	1.20952	0.206895	5.84604	5.03401e-09	8.96683e-08	1855.31	1864.07	2273.99	1020.92	732.35	783.639	918.828	MSX2
gene2018	9.7248	-3.41934	0.997091	-3.42932	0.000605102	0.00206156	2.24478	1.03216	1.19495	8.26658	26.2247	11.3103	17.8002	HGD
gene20192	3715.43	-1.15896	0.206564	-5.61064	2.01577e-08	2.92116e-07	1794.71	2443.11	2301.47	4281.06	4382.44	5691.48	5113.73	FCHO2
gene20216	257.628	-1.3683	0.240073	-5.69953	1.20141e-08	1.86596e-07	170.604	112.505	123.08	336.863	325.381	360.313	374.651	AK6
gene2022	118.069	-1.65817	0.407853	-4.0656	4.79097e-05	0.000232178	54.9972	79.476	23.899	98.1657	140.836	219.742	209.364	STXBP5L
gene2023	518.405	-1.0296	0.249827	-4.12124	3.76834e-05	0.000188527	287.332	374.673	313.077	525.961	550.719	696.389	880.685	POLQ
gene20231	55.3764	-2.48436	0.398732	-6.23065	4.64511e-10	1.18202e-08	22.4478	10.3216	13.1444	86.7991	92.2722	88.0585	74.5912	CD180
gene20237	6064.33	-1.15048	0.219345	-5.24509	1.56208e-07	1.69168e-06	4299.89	3699.25	2720.9	6585.37	7959.69	8363.13	8822.1	SREK1
gene20243	558.063	-1.084	0.242062	-4.47821	7.52709e-06	4.68559e-05	237.947	407.702	375.214	670.627	651.733	736.783	826.436	TRIM23
gene20244	1230.82	-1.1495	0.230555	-4.98581	6.17029e-07	5.44157e-06	750.881	730.767	695.46	1261.69	1477.33	1521.23	2178.4	PPWD1
gene20245	439.684	-1.03799	0.292494	-3.54876	0.000387057	0.00140673	255.905	349.901	217.481	370.963	522.552	557.434	803.551	CENPK
gene20246	344.524	-2.08567	0.316782	-6.58393	4.58161e-11	1.58816e-09	109.994	186.82	64.5272	427.796	571.116	526.735	524.681	ADAMTS6
gene20248	3935.65	-1.30464	0.315405	-4.13641	3.52787e-05	0.000177902	3171.88	1961.1	1283.37	3439.93	5360.53	5189.79	7142.95	CWC27
gene20251	77.3725	-2.15054	0.370395	-5.80607	6.39574e-09	1.0904e-07	33.6718	29.9325	14.3394	111.599	137.923	126.836	87.3056	FAM159B
gene20252	690.361	1.0331	0.256852	4.02217	5.76647e-05	0.000272544	1270.55	693.609	961.934	475.329	499.241	372.431	559.434	LOC494442
gene20256	3931.06	-1.75076	0.207162	-8.45116	2.88427e-17	7.58784e-15	1741.95	1743.31	1529.53	5580.98	4916.65	7114.15	4890.81	RNF180
gene20267	2299.06	-1.72837	0.239094	-7.22882	4.87203e-13	3.41441e-11	933.831	1305.68	730.114	2716.61	3560.73	3613.63	3232.85	ZSWIM6
gene20270	781.897	-1.41867	0.256321	-5.53474	3.11684e-08	4.2021e-07	538.748	374.673	285.593	862.825	1090.75	1070.44	1250.25	NDUFAF2
gene20274	315.535	-1.01311	0.231451	-4.37723	1.20195e-05	7.0148e-05	184.072	220.881	193.582	343.063	350.634	460.489	456.023	DEPDC1B
gene20279	4774.42	-2.20043	0.3121	-7.05039	1.7842e-12	1.01026e-10	1818.28	2079.79	789.861	5185.21	7942.2	8890.67	6714.9	LOC101108953
gene20291	158.437	-1.01581	0.290753	-3.49372	0.000476342	0.00167947	94.281	103.216	102.766	134.332	218.539	191.467	264.46	SETD9
gene20300	38.0531	-1.70439	0.430347	-3.9605	7.47938e-05	0.00034106	22.4478	16.5145	10.7545	50.6328	62.1623	59.7828	44.0766	DDX4
gene20323	15267.5	-2.13518	0.277428	-7.69635	1.40013e-14	1.50581e-12	5980.11	6563.48	3041.14	17148	22681.5	26314.1	25144	ARL15
gene20328	2786.17	-1.22434	0.275904	-4.43756	9.09838e-06	5.51906e-05	2007.96	1510.04	1221.24	2339.44	3907.48	3565.16	4951.84	NDUFS4
gene20339	891.748	-1.19052	0.245819	-4.84308	1.27839e-06	1.01677e-05	475.894	476.856	591.5	827.692	1514.23	1092.25	1263.81	PARP8
gene20349	438.477	-1.8608	0.256507	-7.25439	4.03481e-13	2.91119e-11	161.625	195.078	168.488	448.462	830.449	660.034	605.206	FGF10
gene20366	24.6665	-1.84191	0.593014	-3.10601	0.0018963	0.00549699	7.85675	11.3537	10.7545	12.3999	33.0237	55.7434	41.5337	CCDC152
gene20367	2679.77	-1.37893	0.22028	-6.2599	3.85234e-10	1.00517e-08	1230.14	1758.79	1209.29	3154.73	3489.83	3556.27	4359.35	GHR
gene20368	177.989	-1.02627	0.253547	-4.04765	5.17337e-05	0.00024773	125.708	102.183	107.545	184.965	270.989	219.742	234.793	FBXO4
gene2037	67.6334	-1.13688	0.333452	-3.40943	0.000650993	0.00219652	31.427	51.6078	37.0434	89.8991	101.985	77.5561	83.9151	LOC101111847
gene20386	8.41567	-4.26359	1.25809	-3.38893	0.000701655	0.00234296	0	1.03216	1.19495	7.23326	10.6841	21.8126	16.9525	LOC105602672
gene20390	1901.68	-1.20998	0.246944	-4.89982	9.59231e-07	7.96255e-06	975.359	1186.98	1096.96	1805.22	2322.34	2412.32	3512.57	RICTOR
gene20402	2161.24	-1.4017	0.206902	-6.77467	1.24689e-11	5.27767e-10	1209.94	1215.88	918.915	2762.07	2518.54	3403.58	3099.77	WDR70
gene20407	926.041	-1.32747	0.332528	-3.99205	6.55046e-05	0.000304218	336.718	803.018	351.315	1072.59	861.531	1659.38	1397.74	SLC1A3
gene2041	37.0706	-2.11406	0.529643	-3.99147	6.56641e-05	0.000304793	2.24478	22.7074	13.1444	57.8661	50.5069	63.0143	50.01	CASR
gene20412	780.523	-1.00749	0.29695	-3.39279	0.000691859	0.00231477	308.658	692.577	482.759	1314.39	745.948	1044.58	874.751	SKP2
gene2042	1851.48	-1.09213	0.325832	-3.35181	0.000802864	0.00262705	1239.12	1008.42	1125.64	1619.22	2018.33	1650.49	4299.16	CSTA
gene20425	89.7788	-2.00883	0.32988	-6.08959	1.132e-09	2.5571e-08	33.6718	35.0933	29.8737	129.165	135.98	168.038	96.6295	TTC23L
gene20432	492.082	-1.26667	0.289957	-4.36846	1.25125e-05	7.27272e-05	189.684	387.059	241.38	500.128	824.622	728.704	572.996	ADAMTS12
gene20482	1264.48	-1.87241	0.305762	-6.12374	9.14039e-10	2.12077e-08	445.59	782.374	276.033	1821.75	1703.64	2169.95	1652.03	LOC106991667
gene20490	1890.89	-1.93464	0.29477	-6.56322	5.26582e-11	1.78308e-09	640.886	1032.16	497.099	2452.08	3787.04	2864.73	1962.26	FBXL7
gene20501	923.685	-1.50537	0.242707	-6.20244	5.55948e-10	1.37182e-08	542.116	510.917	297.542	1221.39	1355.92	1169	1368.92	CTNND2
gene20510	2916.9	1.21925	0.21412	5.69423	1.2393e-08	1.91092e-07	4323.46	3850.97	4808.47	1858.95	2101.86	1391.97	2082.62	CCT5
gene20521	935.088	-1.53407	0.216511	-7.08539	1.38651e-12	8.23154e-11	377.124	563.557	405.088	1324.72	1373.4	1146.38	1355.36	ADCY2
gene20547	2498.37	1.21364	0.253195	4.7933	1.64059e-06	1.25916e-05	4670.27	2823.98	3609.94	1579.95	1960.05	1125.37	1718.99	SDHA
gene20553	25.3308	2.30395	0.52033	4.42786	9.51735e-06	5.74468e-05	47.1405	36.1255	56.1626	15.4998	6.799	10.5024	5.08576	TPPP
gene20564	261.033	1.16966	0.301884	3.87452	0.000106833	0.000465202	290.7	460.342	395.528	260.397	128.21	145.418	146.639	LPCAT1
gene20567	2481.01	1.10039	0.220659	4.98685	6.1372e-07	5.41797e-06	4184.28	3418.5	3104.48	1943.68	1879.44	1298.26	1538.44	CLPTM1L
gene20572	1689.47	-1.15191	0.220352	-5.22757	1.71752e-07	1.83808e-06	894.547	1238.59	850.803	2186.51	1803.68	2455.94	2396.24	KLHL2
gene20578	360.459	-1.80309	0.267534	-6.73965	1.58764e-11	6.47937e-10	115.606	193.013	137.419	501.162	443.878	677.808	454.328	TLL1
gene20596	1840.84	-1.26082	0.261924	-4.81369	1.48169e-06	1.15482e-05	974.237	1389.28	707.41	2743.47	2110.6	2917.24	2043.63	LOC101122892
gene20597	418.118	-1.22297	0.265183	-4.61179	3.99221e-06	2.72414e-05	280.598	251.846	179.242	402.996	514.782	592.981	704.378	MND1
gene20615	4286.35	-1.05791	0.191699	-5.51861	3.41694e-08	4.56482e-07	2598.34	2844.62	2503.42	4450.52	5671.34	5962.12	5974.08	LRBA
gene20618	710.119	-1.30916	0.279473	-4.6844	2.80786e-06	2.00897e-05	306.413	557.364	290.373	1214.15	788.684	966.219	847.627	DCLK2
gene20621	13.6338	-2.87314	0.810488	-3.54495	0.000392681	0.00142178	3.36718	3.09647	2.3899	22.7331	8.74157	16.9654	38.1432	LOC105602713
gene20622	13.3035	-2.65506	0.78269	-3.39222	0.000693287	0.0023189	6.73435	3.09647	0	20.6665	16.5119	27.4678	18.6478	LOC106991695
gene20625	1308.74	-1.49719	0.263382	-5.68449	1.31204e-08	2.014e-07	775.573	620.326	526.972	1347.45	2586.53	1717.54	1586.76	NR3C2
gene20629	4390.09	-1.04746	0.224009	-4.67597	2.92574e-06	2.07594e-05	3186.47	3082.02	1913.11	5262.71	5596.55	6215.8	5473.98	ARHGAP10
gene20636	120.944	-1.75895	0.312618	-5.6265	1.83902e-08	2.71097e-07	67.3435	52.64	33.4586	142.599	161.233	201.161	188.173	TTC29
gene20638	661.12	-1.81995	0.290739	-6.25975	3.85607e-10	1.00517e-08	257.028	387.059	166.098	763.626	853.76	1054.28	1145.99	LOC105602726
gene20651	695.278	-1.10859	0.235503	-4.70732	2.50995e-06	1.81942e-05	456.814	432.473	366.849	708.86	761.488	1063.97	1076.49	ANAPC10
gene20658	4728.84	-1.40655	0.230014	-6.11504	9.65346e-10	2.22472e-08	2225.7	3138.79	1934.62	5648.14	6497.9	7791.96	5864.73	GAB1
gene2066	2264.51	-1.53659	0.228781	-6.71645	1.86204e-11	7.47439e-10	1130.25	1360.38	764.767	3041.07	3349.97	3313.91	2891.26	KALRN
gene20660	3187.69	-1.47491	0.196071	-7.52233	5.38105e-14	5.00087e-12	1611.76	1620.49	1509.22	3550.5	4607.78	5125.97	4288.15	INPP4B
gene20666	185	-1.64283	0.36028	-4.55987	5.11864e-06	3.36908e-05	71.8331	134.18	44.2131	174.632	309.84	292.451	267.85	IL15
gene20670	548.898	-1.114	0.258495	-4.30956	1.63579e-05	9.16212e-05	281.721	390.155	316.661	515.628	965.458	681.847	690.816	RNF150
gene20682	60.3094	-1.28324	0.389033	-3.29855	0.000971858	0.00308612	25.815	51.6078	21.5091	94.0324	80.6167	63.8222	84.7627	SCOC
gene20683	4943.63	-1.92777	0.28156	-6.84677	7.55385e-12	3.4911e-10	2122.44	2431.76	1143.57	6941.86	5474.17	9402.06	7089.55	MAML3
gene20700	1251.02	-1.54485	0.291499	-5.29967	1.16012e-07	1.30944e-06	445.59	705.995	639.297	1313.35	1216.05	2559.35	1877.49	SLC7A11
gene20718	1006.9	-1.25619	0.258056	-4.8679	1.12792e-06	9.1323e-06	670.068	648.194	365.654	1071.56	1290.84	1573.74	1428.25	SCLT1
gene20732	382.698	-1.12204	0.269076	-4.16996	3.04649e-05	0.000156254	170.604	258.039	258.109	375.096	456.504	496.844	663.692	ABHD18
gene20735	766.271	-1.01516	0.1982	-5.1219	3.02466e-07	2.94711e-06	452.324	527.432	472.005	914.491	858.617	1041.35	1097.68	MFSD8
gene2075	1606.22	1.48516	0.314641	4.72019	2.35627e-06	1.72115e-05	3249.33	2035.41	2331.34	715.059	1138.35	500.883	1273.14	LOC101121396
gene20752	1774.31	-1.44191	0.234641	-6.14518	7.9871e-10	1.88907e-08	879.956	1037.32	769.547	1822.78	2202.88	2640.95	3066.71	SPATA5
gene20754	2996.36	-1.10136	0.23746	-4.6381	3.51633e-06	2.43537e-05	1461.35	2101.47	1870.09	2940.84	3410.18	4432.01	4758.58	NUDT6
gene20757	516.667	-1.94528	0.380947	-5.10643	3.28294e-07	3.15383e-06	205.398	310.679	72.8919	569.361	600.255	962.988	895.094	FGF2
gene2077	351.719	-1.22821	0.24582	-4.99639	5.84123e-07	5.19153e-06	249.171	197.142	150.564	389.563	523.523	461.297	490.776	SLC12A8
gene2078	1133.41	-1.11532	0.243871	-4.57342	4.79828e-06	3.18656e-05	564.563	601.747	874.702	1133.56	1426.82	1524.46	1807.99	LOC101121910
gene20787	424.371	-1.20911	0.269653	-4.48393	7.32798e-06	4.57497e-05	281.721	240.492	205.531	545.595	385.601	767.482	544.177	TMEM144
gene2079	2288	-1.86103	0.258247	-7.20639	5.74563e-13	3.93504e-11	943.932	1203.49	592.694	2691.81	3240.21	3772.78	3571.05	LOC101117035
gene20793	13.5858	-2.34229	0.740513	-3.16306	0.00156122	0.00465506	4.48957	3.09647	4.77979	12.3999	13.598	35.5465	21.1907	GRIA2
gene20807	2284.99	-1.08709	0.252787	-4.30041	1.70484e-05	9.48055e-05	1528.7	1713.38	930.865	2881.94	2434.04	3659.68	2846.33	ZNF605
gene20821	64.4342	-1.0153	0.340221	-2.98423	0.00284295	0.0077461	33.6718	54.7043	33.4586	70.266	84.5019	89.6742	84.7627	PXMP2
gene20826	311.836	1.06733	0.234543	4.55068	5.34736e-06	3.49274e-05	501.709	431.441	400.308	231.464	250.592	200.353	166.983	LOC106991702
gene20830	464.412	1.3518	0.230942	5.85341	4.81584e-09	8.63217e-08	875.466	660.58	598.669	314.13	305.955	236.708	259.374	NOC4L
gene20835	1698.47	1.03147	0.230104	4.4826	7.37403e-06	4.59869e-05	2542.22	2144.82	2508.2	1476.62	1122.81	1254.63	839.998	ULK1
gene20845	96.9785	-1.28795	0.395848	-3.25366	0.00113929	0.00353959	63.9764	54.7043	40.6283	206.665	71.8752	149.457	91.5437	RIMBP2
gene20847	1781.61	1.52393	0.259137	5.88079	4.0831e-09	7.52381e-08	3565.84	2138.63	2816.49	876.258	971.286	761.827	1340.95	FZD10
gene20848	42.543	-2.35855	0.500986	-4.70781	2.50397e-06	1.81586e-05	13.4687	10.3216	14.3394	27.8997	92.2722	58.9749	80.5246	TMEM132D
gene2085	253.582	-1.17303	0.275238	-4.26189	2.02702e-05	0.000110213	167.236	144.502	131.444	252.131	313.725	297.298	468.738	IQCG
gene20873	8185.1	1.06927	0.266737	4.00871	6.10519e-05	0.000286259	12952.4	8708.3	13373.9	5119.08	5796.63	3739.66	7605.76	UBC
gene20903	2297.14	1.48545	0.212832	6.97945	2.96331e-12	1.57368e-10	4308.86	3125.37	3458.18	1591.32	1166.51	1162.53	1267.2	HIP1R
gene20907	774.988	1.31303	0.260099	5.04819	4.46005e-07	4.10478e-06	1356.97	895.912	1277.4	414.362	614.824	344.155	521.291	LOC101102014
gene20909	4575.95	-1.05115	0.225762	-4.65602	3.22387e-06	2.26306e-05	3573.7	2666.06	2272.79	4755.35	5804.4	6133.39	6825.94	RSRC2
gene20939	755.712	-1.18699	0.223909	-5.30119	1.15048e-07	1.30028e-06	474.772	425.248	411.062	757.426	954.774	1047.81	1218.89	IFT81
gene2094	1085.02	1.06837	0.286274	3.73198	0.000189982	0.000760997	1420.95	1727.83	1493.69	1134.59	495.356	765.866	556.891	TNK2
gene20945	176.776	-1.25263	0.287695	-4.35401	1.33671e-05	7.70396e-05	86.4242	134.18	75.2818	211.831	194.257	263.367	272.088	GPN3
gene20960	92.5152	1.68576	0.349111	4.82872	1.37412e-06	1.08233e-05	140.299	126.955	189.997	60.9661	62.1623	29.0835	38.1432	FAM109A
gene20966	413.239	-1.07494	0.25688	-4.1846	2.8567e-05	0.000147805	295.189	285.907	178.047	520.795	488.557	667.305	456.871	LOC101105533
gene20975	3696.03	1.73603	0.214579	8.09039	5.94751e-16	1.0273e-13	6478.45	5625.25	6372.66	1735.98	2219.39	1396.01	2044.48	HSPB8
gene20988	31.8069	-1.77125	0.504511	-3.51083	0.000446706	0.00158874	7.85675	15.4823	16.7293	65.0993	30.1099	33.1229	54.2481	KSR2
gene20997	599.968	1.04678	0.260408	4.01979	5.82512e-05	0.000275013	1113.41	625.487	813.76	367.863	430.28	334.461	514.51	C17H12orf49
gene210	1360.07	1.35395	0.180995	7.48061	7.39757e-14	6.69304e-12	2104.49	2019.93	2131.79	883.491	879.014	761.827	739.978	HEYL
gene21016	820.11	1.56688	0.233678	6.70531	2.00983e-11	7.86524e-10	1447.89	1098.21	1412.43	490.828	485.643	316.687	489.081	PLBD2
gene21020	79.7549	1.13163	0.377897	2.99454	0.00274858	0.00752013	114.484	97.0227	135.029	77.4992	65.0762	41.2017	27.9717	CFAP73
gene21021	1916.8	1.55122	0.21719	7.14223	9.18293e-13	5.83748e-11	3372.79	2777.53	3071.02	1129.42	1174.28	761.827	1130.73	DDX54
gene21022	464.608	1.29254	0.238586	5.4175	6.04382e-08	7.53275e-07	839.55	550.139	715.774	339.963	303.041	235.092	268.698	RITA1
gene21033	865.153	-1.01421	0.298791	-3.39438	0.000687836	0.00230291	841.794	408.734	389.553	820.458	1067.44	1248.17	1279.92	RPL6
gene21050	529.955	1.34508	0.218396	6.15889	7.32549e-10	1.75689e-08	721.698	807.146	903.381	381.296	314.697	258.52	322.946	RAB35
gene21051	2594.19	1.36243	0.224194	6.07701	1.22447e-09	2.71797e-08	4085.51	3920.13	3951.69	2079.05	1415.16	1506.69	1201.09	GCN1
gene21052	55973.9	1.153	0.290591	3.96779	7.25429e-05	0.000332391	105432	59147.7	80369.9	32280	45582.4	22253.7	46751.7	RPLP0
gene21064	4230.95	1.18136	0.19886	5.94063	2.83927e-09	5.45921e-08	5944.19	5686.15	7020.32	3223.97	2791.48	2283.06	2667.48	RNF10
gene21068	2559.44	1.33174	0.207011	6.43318	1.24963e-10	3.79711e-09	4017.04	3363.8	4330.49	1842.41	1658.96	1337.03	1366.37	MLEC
gene21069	1269.14	1.38934	0.227555	6.10549	1.02487e-09	2.33844e-08	1973.17	1665.9	2247.7	873.158	824.622	550.163	749.302	UNC119B
gene21085	1115	1.00286	0.269452	3.72184	0.000197776	0.000786689	2188.67	1399.6	1098.16	853.525	741.091	604.291	919.675	MVK
gene21105	661.411	1.58189	0.30171	5.2431	1.57901e-07	1.70677e-06	1081.99	1080.67	1039.61	392.663	557.518	236.708	240.726	TMEM119
gene21109	156.817	1.45211	0.290229	5.00334	5.63462e-07	5.03933e-06	227.846	254.943	254.524	101.266	123.353	65.4379	70.3531	FICD
gene2111	1829	-1.202	0.215106	-5.58794	2.29774e-08	3.25799e-07	1070.76	973.323	1104.13	1808.32	2378.68	2571.47	2896.34	PIGX
gene21130	303.496	1.34527	0.216505	6.21359	5.17882e-10	1.28905e-08	478.139	504.724	409.867	197.365	197.171	175.309	161.897	SRRD
gene21131	797.61	1.31749	0.208433	6.32091	2.6002e-10	7.2416e-09	1385.03	1206.59	1045.58	433.996	575.973	475.839	460.262	TFIP11
gene21139	1603.83	-1.14072	0.248686	-4.58699	4.49672e-06	3.01427e-05	938.32	1228.27	682.316	1682.25	2554.48	2107.75	2033.46	TTC28
gene21154	1201.14	1.07002	0.246438	4.34194	1.41231e-05	8.069e-05	2291.93	1279.87	1570.16	842.158	971.286	710.931	741.674	GAS2L1
gene21156	1688.31	1.45119	0.228667	6.34632	2.20529e-10	6.3061e-09	2988.93	2347.12	2607.38	1286.49	944.09	866.043	778.122	AP1B1
gene21166	1175.04	1.0845	0.209613	5.17381	2.29373e-07	2.34867e-06	1858.68	1688.61	1502.05	989.923	739.149	758.595	688.273	ASCC2
gene21175	1659.87	1.64952	0.250838	6.57603	4.83174e-11	1.66243e-09	2908.12	2417.31	2827.25	1133.56	985.855	583.286	763.712	SF3A1
gene21184	533.851	1.54306	0.215578	7.15777	8.20003e-13	5.39115e-11	1026.99	758.635	777.912	337.897	273.903	282.757	278.869	PES1
gene21185	871.936	2.09492	0.354297	5.9129	3.36137e-09	6.30949e-08	1794.71	835.014	2021.85	292.43	583.743	356.273	219.535	TCN2
gene21186	191.168	1.19871	0.248416	4.82539	1.39727e-06	1.09855e-05	280.598	279.714	285.593	129.165	154.434	100.177	108.496	DUSP18
gene21188	115.067	1.00046	0.319794	3.12843	0.0017574	0.00515464	113.362	155.856	213.896	102.299	81.588	79.9797	58.4863	OSBP2
gene21195	82.7464	1.78456	0.335121	5.32513	1.00883e-07	1.1609e-06	125.708	118.698	173.268	40.2996	37.8802	28.2757	55.0958	PLA2G3
gene21197	5429.21	1.57144	0.224144	7.01084	2.369e-12	1.29839e-10	10339.5	7010.41	8884.44	3442	2823.53	2287.9	3216.74	LIMK2
gene212	94.6806	1.14115	0.317064	3.59913	0.000319285	0.00119053	101.015	190.949	120.69	69.2326	64.1049	55.7434	61.0292	HPCAL4
gene21221	853.965	2.97998	0.320318	9.30317	1.36317e-20	8.63341e-18	1170.66	2742.44	1199.73	253.164	253.506	160.767	197.497	LOC101108519
gene21229	95.0104	2.03629	0.415129	4.90519	9.33347e-07	7.7741e-06	103.26	166.177	231.82	73.3659	35.9376	29.0835	25.4288	ZNF70
gene21230	19.3428	1.73226	0.59493	2.9117	0.00359468	0.0094626	26.9374	49.5435	20.3141	8.26658	4.85643	16.1575	9.3239	VPREB3
gene21232	484.652	1.36192	0.413307	3.29518	0.000983574	0.00312043	1294.12	345.772	593.889	196.331	436.107	172.885	353.461	CHCHD10
gene21234	1081.25	1.49164	0.237717	6.27485	3.49981e-10	9.27856e-09	2094.38	1680.35	1358.66	729.526	682.814	500.883	522.138	SMARCB1
gene21238	119.533	1.50485	0.465453	3.23308	0.00122462	0.00377247	342.33	107.344	119.495	51.6661	96.1573	29.8914	89.8485	MIF
gene21239	15879.4	2.97624	0.176674	16.8459	1.12394e-63	1.92194e-59	29327	30058.5	35665.6	4067.16	4076.49	4267.2	3693.96	LOC106991688
gene21241	158.32	1.82068	0.337732	5.39091	7.01018e-08	8.50958e-07	378.246	158.952	267.668	52.6995	92.2722	71.0931	87.3056	LOC101118990
gene21244	432.349	1.22373	0.308146	3.97128	7.14866e-05	0.000328255	501.709	811.275	613.009	408.163	208.826	303.761	179.697	CABIN1
gene21245	631.112	1.96562	0.31433	6.25338	4.01672e-10	1.0413e-08	1723.99	657.484	911.746	287.264	336.065	218.126	283.107	SUSD2
gene21246	594.376	2.38356	0.342214	6.96513	3.28095e-12	1.7053e-10	1478.19	1357.29	477.979	245.931	226.31	218.126	156.811	GGT5
gene21247	467.953	2.64107	0.2759	9.57255	1.04302e-21	8.19281e-19	1170.66	980.548	547.286	145.699	159.291	135.723	136.468	GGT1
gene21249	831.103	1.10883	0.224922	4.92985	8.22915e-07	6.96971e-06	1321.06	1177.69	1095.77	613.794	591.513	398.283	619.615	GUCD1
gene2125	1374.19	-1.03759	0.228255	-4.54577	5.47343e-06	3.56419e-05	765.472	966.098	842.439	1305.09	1954.23	1644.03	2141.95	ACAP2
gene21253	1263.9	1.27828	0.229	5.582	2.3777e-08	3.35467e-07	1918.17	1738.15	2051.73	1043.66	797.426	645.493	652.673	SPECC1L
gene21254	597.513	1.71788	0.296667	5.7906	7.01338e-09	1.17232e-07	1268.3	735.927	971.493	383.363	291.386	176.117	356.003	LOC106991714
gene21255	502.326	1.74587	0.28395	6.14851	7.82145e-10	1.85759e-08	840.672	824.693	849.608	393.696	218.539	172.078	216.993	BCR
gene21261	317.057	1.52139	0.345944	4.3978	1.09352e-05	6.47481e-05	475.894	716.316	322.636	274.864	123.353	182.58	123.754	TOP3B
gene21262	780.498	1.31038	0.229038	5.72122	1.05762e-08	1.66225e-07	1492.78	1039.38	1020.49	519.761	547.805	433.021	410.252	PPM1F
gene21265	623.815	1.30646	0.237547	5.4998	3.80221e-08	5.00137e-07	1044.95	977.452	813.76	490.828	412.797	316.687	310.232	PPIL2
gene21266	387.475	1.24998	0.328299	3.80745	0.000140405	0.000587885	840.672	342.676	554.456	233.531	321.496	156.728	262.764	SDF2L1
gene2127	1067.22	1.38851	0.239361	5.80089	6.59642e-09	1.11571e-07	1713.89	1273.68	1962.11	596.227	742.062	479.878	702.683	FAM43A
gene21273	1831.65	1.78541	0.258158	6.91596	4.64721e-12	2.31009e-10	2721.8	3496.95	3025.61	1304.05	841.134	784.447	647.587	PI4KA
gene21275	844.715	1.36355	0.261891	5.20657	1.92367e-07	2.00945e-06	1078.62	1240.65	1574.94	724.359	407.94	416.056	470.433	CRKL
gene21276	521.241	1.26847	0.243113	5.21759	1.81268e-07	1.91931e-06	978.726	758.635	610.619	391.629	340.921	270.638	297.517	LZTR1
gene21278	116.861	1.28861	0.333506	3.86382	0.000111627	0.000483123	143.666	197.142	187.607	103.332	81.588	42.8174	61.8768	TUBA3E
gene21279	95.4883	1.03482	0.310967	3.32774	0.000875531	0.0028291	168.359	130.052	106.35	60.9661	81.588	71.0931	50.01	LRRC74B
gene21285	1181.05	1.0367	0.216228	4.79448	1.63101e-06	1.25406e-05	1923.78	1530.69	1555.82	977.523	783.828	851.501	644.197	SMPD4
gene21288	305.653	1.35949	0.247582	5.49104	3.99568e-08	5.22771e-07	539.871	471.695	395.528	232.498	188.429	145.418	166.135	LOC101119851
gene21291	304.868	1.99893	0.260662	7.66867	1.73787e-14	1.82487e-12	636.397	430.409	532.947	140.532	160.262	94.5215	139.011	DGCR14
gene21292	1663.24	1.66433	0.366646	4.53935	5.64281e-06	3.655e-05	4507.53	1659.71	2027.83	702.66	1301.52	500.883	942.561	SLC25A1
gene21296	132.445	1.06607	0.299595	3.55837	0.000373157	0.00136404	215.499	223.978	126.665	105.399	75.7603	100.984	78.8293	CDC45
gene21300	64.6914	1.31237	0.351283	3.73593	0.000187021	0.000750719	111.117	112.505	70.502	51.6661	39.8227	29.0835	38.1432	ARVCF
gene21302	2406.74	1.06954	0.238707	4.48057	7.44446e-06	4.64091e-05	3890.21	3657.96	2753.16	2219.58	1482.18	1492.15	1351.97	DGCR8
gene21303	894.21	1.25884	0.262261	4.79994	1.58714e-06	1.22584e-05	1893.48	1150.85	975.078	555.928	663.388	478.262	542.481	TRMT2A
gene21305	285.392	1.66776	0.290699	5.73707	9.63279e-09	1.54233e-07	574.665	362.287	469.615	158.098	206.884	105.832	120.363	ZDHHC8
gene21307	96.2632	1.3376	0.410784	3.25621	0.0011291	0.00351175	178.46	103.216	158.928	66.1327	99.0712	29.8914	38.1432	RTN4R
gene21311	296.093	1.35444	0.28375	4.77335	1.81184e-06	1.37161e-05	432.121	386.026	543.702	185.998	229.223	108.255	187.326	NDN
gene21326	224.732	-3.00005	0.477493	-6.28292	3.32272e-10	8.87789e-09	93.1586	31.9968	9.55959	244.898	432.222	428.174	333.117	GABRG3
gene2133	16210	2.03804	0.236996	8.59948	8.00805e-18	2.48978e-15	26241.5	23772.6	35645.3	6782.73	7594.48	5084.77	8348.28	LRRC15
gene21336	884.806	-1.15608	0.20022	-5.77403	7.73965e-09	1.27258e-07	441.1	616.197	501.878	1192.45	1101.44	1217.47	1123.11	LINS1
gene21339	1832.99	-1.23423	0.279953	-4.40872	1.03986e-05	6.21949e-05	881.078	1570.94	648.857	2398.34	2265.04	2644.99	2421.67	ADAMTS17
gene2134	66.2531	1.6139	0.313977	5.14017	2.74483e-07	2.72254e-06	97.6481	115.601	109.935	28.933	38.8514	36.3544	36.448	CPN2
gene21346	1633.17	-1.31045	0.217741	-6.01839	1.76161e-09	3.6736e-08	998.929	797.857	857.973	1624.38	2362.17	2340.42	2450.49	LRRC28
gene21347	535.052	-1.11445	0.21163	-5.26603	1.39407e-07	1.53501e-06	328.861	364.351	270.058	598.294	740.12	702.852	740.826	TTC23
gene21349	2093.33	1.11027	0.245178	4.52844	5.94213e-06	3.80718e-05	2541.1	2534.98	3982.76	1166.62	1792.99	1317.65	1317.21	SYNM
gene21350	5733.54	-1.29316	0.249803	-5.17671	2.25833e-07	2.31658e-06	2917.1	4230.81	2256.06	8471.18	6334.73	8912.48	7012.42	IGF1R
gene21352	77.9624	-1.40026	0.466798	-2.99972	0.00270225	0.00741948	26.9374	74.3152	19.1192	107.466	61.191	157.536	99.1724	FAM169B
gene21365	1868.93	-1.29973	0.261486	-4.97054	6.67658e-07	5.81607e-06	849.651	1431.6	773.132	2343.58	1992.11	2984.29	2708.17	MCTP2
gene21374	3633.38	-1.00257	0.208845	-4.80055	1.58234e-06	1.22379e-05	2749.86	2319.26	1858.15	4873.15	3926.91	5096.08	4610.24	SLCO3A1
gene21375	541.573	-1.32251	0.241172	-5.48367	4.16582e-08	5.42127e-07	279.476	374.673	219.871	712.993	643.963	853.117	706.921	LOC105603291
gene21381	1780.01	-1.72315	0.294171	-5.85765	4.69465e-09	8.4861e-08	621.805	1188.01	495.904	2700.07	2064.95	3030.34	2358.95	LOC105603073
gene21385	18.8129	-2.27794	0.698003	-3.2635	0.00110044	0.00343073	3.36718	8.25725	5.97474	18.5998	23.3109	14.5418	57.6386	AGBL1
gene21390	1574.18	-1.27929	0.360792	-3.54579	0.000391442	0.00141875	1238	1065.19	297.542	1835.18	2282.52	2222.47	2078.38	NTRK3
gene21395	156.149	1.34788	0.342523	3.93515	8.3144e-05	0.000374345	193.051	248.75	274.838	156.032	69.9326	60.5907	89.8485	AEN
gene2141	1320.91	-1.15042	0.208902	-5.50697	3.65059e-08	4.83166e-07	765.472	938.23	630.933	1598.55	1609.42	1902.55	1801.21	MB21D2
gene2143	168.801	-1.55459	0.392511	-3.96064	7.47498e-05	0.00034095	87.5466	85.669	66.9171	141.565	441.935	149.457	208.516	FGF12
gene21430	860.938	1.65897	0.233855	7.09401	1.30278e-12	7.84418e-11	1474.82	1115.76	1646.64	418.496	563.346	367.583	439.918	MFGE8
gene21463	1687.13	1.09081	0.201931	5.40189	6.59435e-08	8.08e-07	2756.6	2236.68	2269.21	1324.72	1165.54	947.638	1109.54	UNC45A
gene21464	391.153	1.16239	0.37052	3.13718	0.0017058	0.0050257	838.427	362.287	515.023	225.264	354.519	118.758	323.794	HDDC3
gene21465	511.589	1.2322	0.284892	4.32516	1.52421e-05	8.63332e-05	618.438	895.912	769.547	483.595	238.936	327.19	247.507	MAN2A2
gene21467	1222.37	1.92422	0.251707	7.64471	2.09412e-14	2.13151e-12	1967.55	1836.21	2527.32	774.992	552.662	443.524	454.328	FURIN
gene21485	38725	-1.288	0.364512	-3.5335	0.000410103	0.00147637	36079.3	15008.6	12606.7	30336.3	53103.1	47609.7	76331.4	RPS17
gene21502	1509.77	-1.74685	0.296702	-5.88757	3.91925e-09	7.26102e-08	642.008	912.426	375.214	2147.25	1637.59	2782.32	2071.6	ADAMTSL3
gene21504	122.747	-1.05283	0.320218	-3.28786	0.00100951	0.00318968	74.0779	102.183	51.3828	196.331	124.325	175.309	135.62	SAXO2
gene21508	5410.39	1.26568	0.248104	5.10144	3.37088e-07	3.22563e-06	10612.2	5711.95	8038.42	4070.26	2866.26	2992.37	3581.22	CTSH
gene21511	1492.85	1.21871	0.338274	3.60274	0.000314881	0.00117745	3070.87	1342.84	2229.77	857.658	1466.64	541.277	940.866	TMED3
gene2152	1270.04	-1.16971	0.220152	-5.31316	1.0774e-07	1.22253e-06	681.292	778.246	763.572	1232.75	1645.36	1788.64	2000.4	IL1RAP
gene21520	92.0936	-1.08222	0.332915	-3.25074	0.00115106	0.00356806	38.1613	76.3796	53.7727	105.399	150.549	120.373	100.02	ARNT2
gene2154	310.148	-2.01922	0.286149	-7.05653	1.70717e-12	9.78389e-11	106.627	134.18	97.9858	361.663	376.859	424.943	668.778	CLDN16
gene21544	410.075	1.24378	0.293423	4.23885	2.24668e-05	0.000120245	697.006	512.982	626.153	237.664	364.232	151.073	281.412	NSMCE3
gene21547	684.578	-1.31502	0.290101	-4.53298	5.81563e-06	3.74895e-05	390.593	465.502	253.329	1173.85	593.456	1057.51	857.799	TARSL2
gene2156	1932.34	-1.34217	0.174151	-7.70695	1.28859e-14	1.4216e-12	1064.03	961.97	1062.31	2506.84	2504.95	2829.18	2597.13	P3H2
gene21569	207.439	1.12665	0.370174	3.04356	0.00233798	0.00655778	479.262	179.595	242.575	107.466	210.769	100.177	132.23	SH2D7
gene21576	1115.19	1.0335	0.299277	3.45332	0.000553728	0.00191095	1514.11	1718.54	1493.69	836.992	1165.54	428.174	649.282	CRABP1
gene2158	19436.2	-1.05281	0.175896	-5.98542	2.15836e-09	4.36264e-08	11541.6	12625.3	11959	23283.9	23619.7	28726.4	24297.2	TP63
gene21595	3506.67	-1.48545	0.249629	-5.95063	2.67116e-09	5.2083e-08	2132.55	1848.59	1204.51	3768.53	4499.97	5312.59	5779.97	SCAPER
gene21600	2133.4	-1.11928	0.19355	-5.7829	7.34222e-09	1.21648e-07	1128	1437.79	1266.65	2372.51	3053.72	2872	2803.1	PEAK1
gene21604	54.5874	1.80346	0.411937	4.378	1.19771e-05	6.99483e-05	71.8331	83.6047	120.69	26.8664	42.7366	18.5811	17.8002	LINGO1
gene2161	599.323	-1.14934	0.261292	-4.3987	1.08903e-05	6.45936e-05	336.718	258.039	466.03	767.759	659.503	704.468	1002.74	TPRG1
gene21619	439.903	1.91982	0.285946	6.71392	1.8947e-11	7.56993e-10	831.693	677.094	767.157	257.297	262.247	157.536	126.296	C18H15orf39
gene2162	7175.51	-1.87793	0.282432	-6.64914	2.94804e-11	1.08179e-09	2866.59	3999.61	1645.44	8229.38	11187.3	11764.3	10536	LPP
gene21620	86.5141	1.35849	0.368189	3.68965	0.000224564	0.000877923	178.46	75.3474	144.589	68.1993	41.7653	56.5513	40.6861	LOC105603154
gene21626	294.165	1.26415	0.220848	5.72407	1.03999e-08	1.64182e-07	481.506	371.576	470.81	204.598	185.516	168.846	176.306	MPI
gene21627	1740.66	1.41237	0.209281	6.74867	1.49203e-11	6.10374e-10	2626.4	2551.49	2939.57	1204.85	988.769	786.063	1087.51	SCAMP2
gene21631	1010.93	1.33092	0.249176	5.34128	9.22905e-08	1.07431e-06	1801.44	1308.77	1514	764.659	730.407	476.647	480.605	CSK
gene21640	918.499	1.20875	0.283327	4.26627	1.9877e-05	0.000108225	1926.03	968.163	1183	583.827	693.498	409.593	665.387	UBL7
gene21641	167.193	1.36657	0.34055	4.01283	5.99951e-05	0.000281768	198.663	297.261	274.838	167.398	73.8177	88.8663	69.5054	SEMA7A
gene21646	600.964	1.82617	0.291068	6.27404	3.51788e-10	9.29765e-09	1282.89	630.647	1143.57	250.064	379.773	219.742	300.06	ISLR
gene21653	36.4552	-4.19599	0.753218	-5.57075	2.53641e-08	3.54751e-07	5.61196	2.06431	2.3899	77.4992	24.2821	118.758	24.5812	LOC101112678
gene21664	1199.73	-1.05851	0.236392	-4.47778	7.54246e-06	4.69175e-05	827.203	746.249	650.052	1068.46	1863.9	1565.66	1676.61	STXBP6
gene21668	773.077	-1.55096	0.297637	-5.2109	1.8793e-07	1.97275e-06	313.147	527.432	261.694	724.359	1404.48	1026.81	1153.62	NOVA1
gene21678	898.758	-1.60375	0.29962	-5.35262	8.66913e-08	1.01885e-06	376.001	544.978	323.831	735.726	1749.29	1275.64	1285.85	PRKD1
gene21682	1777.88	-1.29771	0.227835	-5.69583	1.22775e-08	1.89823e-07	890.057	1015.64	1003.76	1762.85	2336.91	2341.22	3094.69	G2E3
gene21689	1235.36	-1.30729	0.205579	-6.35905	2.0301e-10	5.84423e-09	764.349	655.419	591.5	1558.25	1419.05	1728.05	1930.89	AP4S1
gene21695	20.2265	-2.17174	0.623598	-3.48259	0.000496591	0.00173987	6.73435	4.12862	9.55959	18.5998	20.397	35.5465	46.6195	GPR33
gene21696	1613.97	-1.44247	0.248385	-5.80741	6.3445e-09	1.08274e-07	890.057	996.031	556.846	1797.98	2056.21	2435.75	2564.92	NUBPL
gene217	191.445	1.26748	0.24091	5.26124	1.43089e-07	1.56747e-06	278.353	287.972	296.347	104.366	121.411	105.024	146.639	MYCL
gene21702	740.894	-1.63827	0.325705	-5.02992	4.90673e-07	4.47017e-06	402.939	431.441	172.073	674.76	1332.6	1137.49	1034.95	NPAS3
gene21717	416.378	-1.4419	0.320168	-4.50357	6.682e-06	4.21742e-05	145.911	348.869	135.029	542.495	573.059	646.301	522.986	LOC101118645
gene21721	1125.04	-1.25874	0.224772	-5.60005	2.14295e-08	3.07162e-07	639.764	733.863	505.463	1250.32	1334.55	1712.7	1698.64	KIAA0391
gene21738	74.5689	1.07034	0.333636	3.20809	0.00133618	0.00406449	95.4034	98.0548	125.47	55.7994	67.99	42.8174	36.448	PAX9
gene21740	253.797	-1.25189	0.327559	-3.82187	0.000132443	0.00055976	191.929	165.145	68.1121	268.664	326.352	390.204	366.175	SLC25A21
gene21742	531.642	-1.23441	0.313631	-3.93588	8.28936e-05	0.000373513	273.864	422.152	203.141	435.029	763.431	675.384	948.495	MIPOL1
gene21744	260.624	1.73883	0.28944	6.00758	1.88308e-09	3.89377e-08	398.449	447.956	456.47	140.532	186.487	113.103	81.3722	FOXA1
gene21746	8.7883	2.45594	0.82846	2.96447	0.00303205	0.00819343	23.5702	18.5788	7.16969	5.16661	2.91386	2.42363	1.69525	SSTR1
gene21748	284.068	1.08945	0.328522	3.31621	0.000912466	0.00292688	487.118	286.939	448.106	179.798	287.501	107.447	191.564	CLEC14A
gene21754	542.494	-1.10643	0.268352	-4.12305	3.73895e-05	0.000187276	365.9	295.197	320.246	471.195	761.488	618.833	964.6	GEMIN2
gene21771	59.7744	-1.52405	0.483234	-3.15387	0.00161123	0.00478618	37.039	35.0933	14.3394	33.0663	78.6742	89.6742	130.535	LRFN5
gene21784	2768.01	-1.14326	0.21343	-5.3566	8.48024e-08	1.00008e-06	1683.59	1932.2	1295.32	3278.73	3195.53	4097.55	3893.15	PRPF39
gene21785	122.813	-1.01134	0.345429	-2.92779	0.00341385	0.00906755	60.6092	120.762	51.3828	136.399	127.238	196.314	166.983	FKBP3
gene21787	1568.01	-1.0899	0.289162	-3.76918	0.000163786	0.000672446	1143.72	1068.28	647.662	1345.39	1829.9	2078.66	2862.44	MIS18BP1
gene21796	969.82	1.50407	0.262506	5.72966	1.00633e-08	1.59779e-07	1675.73	1481.14	1460.23	607.594	738.177	476.647	349.222	MAP1A
gene21798	1066.74	1.73909	0.34265	5.07541	3.8666e-07	3.6389e-06	2331.21	900.04	2104.3	635.494	633.278	293.259	569.605	CKMT1A
gene21800	155.709	-1.01122	0.268884	-3.76082	0.00016936	0.000692172	98.7705	117.666	78.8666	194.265	188.429	240.747	171.221	CATSPER2
gene21810	261.616	-2.05579	0.312612	-6.57615	4.82778e-11	1.66243e-09	106.627	116.634	56.1626	262.464	477.873	440.292	371.261	FRMD5
gene21816	312.712	-1.1039	0.236911	-4.65957	3.16872e-06	2.22984e-05	173.971	229.139	162.513	487.728	367.146	385.357	383.127	LOC101112168
gene21823	368.445	-1.10066	0.259103	-4.24796	2.15729e-05	0.000116248	305.291	182.692	180.437	400.929	501.184	466.952	541.634	NDUFB1
gene21844	518.837	1.78571	0.299032	5.97165	2.34862e-09	4.66993e-08	581.399	789.6	1247.53	295.53	316.639	201.969	199.192	OTUB2
gene21845	2076.95	1.20041	0.246837	4.86318	1.15517e-06	9.32068e-06	3917.15	2614.45	2668.32	1379.49	1683.24	979.145	1296.87	DDX24
gene21851	264.04	-1.06192	0.277426	-3.82777	0.000129307	0.000548808	118.974	178.563	191.192	240.764	388.514	403.938	326.336	PPP4R4
gene21854	3661.23	1.95731	0.339828	5.7597	8.42632e-09	1.37204e-07	5822.97	4164.75	9089.97	1698.78	2491.35	857.964	1502.84	SERPINA1
gene21858	314.188	2.16002	0.313064	6.8996	5.21508e-12	2.54068e-10	554.462	357.126	782.691	136.399	89.3583	112.295	166.983	SERPINA12
gene21868	160.862	1.31228	0.261746	5.01356	5.3432e-07	4.83433e-06	258.15	279.714	194.777	91.9657	101.985	115.526	83.9151	CLMN
gene21883	1758.34	-1.205	0.228478	-5.27403	1.33459e-07	1.47903e-06	989.95	884.558	1147.15	1853.78	3049.84	2119.06	2264.01	GSKIP
gene2189	78.3184	-1.38423	0.366929	-3.77248	0.000161635	0.000665211	46.0181	56.7686	19.1192	96.099	111.698	106.64	111.887	CRYGS
gene21895	648.071	1.58018	0.235479	6.71048	1.93989e-11	7.69655e-10	1116.78	910.362	1110.11	424.696	276.816	290.027	407.709	CCDC85C
gene21896	151.892	1.41041	0.312193	4.51776	6.24986e-06	3.98333e-05	294.067	154.823	259.304	80.5992	97.1286	65.4379	111.887	HHIPL1
gene219	4833.81	1.23469	0.259372	4.76028	1.93322e-06	1.44555e-05	7534.62	5729.5	8334.77	3023.5	3579.19	1927.59	3707.52	CAP1
gene21902	962.339	1.30388	0.235455	5.53773	3.06422e-08	4.152e-07	1732.97	1175.63	1465.01	761.559	530.322	492.804	578.082	DEGS2
gene21906	1553.36	1.68638	0.254168	6.6349	3.24724e-11	1.17644e-09	2648.85	2524.65	2514.17	807.025	1052.87	493.612	832.37	WARS
gene21907	406.536	-1.10787	0.293789	-3.77096	0.00016262	0.000668464	296.312	300.357	137.419	596.227	426.395	485.533	603.511	WDR25
gene2194	834.212	-1.91058	0.309133	-6.18045	6.39185e-10	1.55921e-08	232.335	493.371	244.964	881.424	1033.45	1551.12	1402.82	IGF2BP2
gene21971	175.418	1.59552	0.358484	4.45073	8.55769e-06	5.23191e-05	235.702	348.869	266.474	132.265	129.181	48.4725	66.9625	DIO3
gene21975	7300.85	2.00786	0.262448	7.65051	2.00189e-14	2.05937e-12	12157.8	12063.8	14158.9	4715.05	2965.34	2894.62	2150.43	DYNC1H1
gene2198	790.847	-1.23052	0.224654	-5.47741	4.31598e-08	5.59116e-07	430.999	528.464	381.189	849.391	991.683	1250.59	1103.61	MAP3K13
gene21992	2067.14	1.26405	0.262329	4.81857	1.44589e-06	1.13157e-05	2455.79	3449.47	3398.43	1880.65	1088.81	1210.2	986.638	CDC42BPB
gene22	3694.67	1.53001	0.350888	4.36039	1.29831e-05	7.51815e-05	6797.21	6307.51	4588.6	3192.97	846.961	2398.58	1730.85	C1H2orf54
gene22008	260.468	1.31319	0.306581	4.28335	1.84096e-05	0.000101354	494.975	351.965	339.365	175.665	156.377	90.4821	214.45	TRMT61A
gene22019	370.399	1.05251	0.305741	3.44248	0.000576398	0.00197523	521.912	612.069	443.326	408.163	220.482	217.319	169.525	KIF26A
gene22023	1373.29	1.38961	0.258251	5.38084	7.41377e-08	8.93415e-07	2370.49	2068.44	1931.04	1148.02	785.77	765.058	544.177	INF2
gene22027	648.741	1.12236	0.262992	4.26766	1.97535e-05	0.000107712	1066.27	787.535	961.934	450.529	575.973	282.757	416.185	AKT1
gene22030	404.791	2.31	0.298217	7.74605	9.47974e-15	1.11796e-12	739.657	666.773	825.709	244.898	120.439	129.26	106.801	CEP170B
gene22031	60.1534	1.08669	0.372355	2.91843	0.00351796	0.00929786	72.9555	90.8297	94.4009	48.5662	57.3059	29.8914	27.1241	PLD4
gene22032	4439.89	2.02659	0.276558	7.32791	2.33775e-13	1.82537e-11	10870.4	5154.59	7390.76	2486.17	1952.28	1708.66	1516.4	AHNAK2
gene22033	73.5603	1.47759	0.414342	3.56612	0.00036231	0.0013293	131.32	99.087	117.105	76.4659	39.8227	29.0835	22.0383	C18H14orf79
gene22035	106.9	1.25802	0.305326	4.12025	3.78454e-05	0.000189116	140.299	140.373	199.556	67.166	85.4732	48.4725	66.9625	CDCA4
gene22044	134.491	1.52567	0.355576	4.29071	1.781e-05	9.85599e-05	262.64	210.56	169.683	86.7991	105.87	70.2852	35.6003	C18H14orf80
gene22052	354.725	5.64888	1.91627	2.94785	0.00319992	0.00858602	569.053	1273.68	575.965	20.6665	43.7079	0	0	LOC101108522
gene22062	504.907	-1.81606	0.29962	-6.06121	1.35105e-09	2.94679e-08	252.538	252.878	114.715	545.595	837.248	849.885	681.492	VOPP1
gene22064	1924.47	-1.11428	0.206277	-5.40183	6.5963e-08	8.08e-07	1322.18	1180.79	963.129	2401.44	2269.9	2985.1	2348.77	LANCL2
gene22065	8560.42	-1.34853	0.192261	-7.01406	2.315e-12	1.28112e-10	4168.57	5233.03	4231.31	11294.2	9968.31	12961.6	12066	EGFR
gene22068	191.121	-1.26993	0.305472	-4.15727	3.22067e-05	0.000164202	123.463	129.02	64.5272	271.764	182.602	287.604	278.869	NEK10
gene22069	995.242	-1.16389	0.279678	-4.16153	3.16116e-05	0.000161602	515.178	806.114	425.402	1136.66	1242.27	1795.1	1045.97	SLC4A7
gene2207	562.13	1.0195	0.27004	3.77536	0.000159778	0.000658206	965.257	531.56	877.092	335.83	454.562	307.801	462.804	MAGEF1
gene22075	660.933	-1.67312	0.319417	-5.23804	1.6229e-07	1.74758e-06	358.043	386.026	136.224	815.292	1053.85	1076.09	801.008	ZCWPW2
gene22076	85.4134	-2.31526	0.367994	-6.29157	3.1427e-10	8.5032e-09	20.2031	34.0612	23.899	82.6658	140.836	163.999	132.23	LOC106991755
gene22079	4539.97	-1.85656	0.314722	-5.89905	3.65606e-09	6.8103e-08	1853.07	2739.34	859.168	6081.11	6746.55	7468.81	6031.71	RBMS3
gene2208	2189.89	1.11193	0.22943	4.84649	1.25665e-06	1.00134e-05	3522.07	2736.25	3221.58	1980.88	1324.83	1242.51	1301.11	EPHB3
gene22087	1565.8	-1.55746	0.260829	-5.9712	2.35518e-09	4.67753e-08	661.089	1024.93	538.922	2622.57	1716.26	2304.87	2091.94	OSBPL10
gene2209	2705.38	1.93138	0.306604	6.29927	2.99057e-10	8.1822e-09	5019.34	3701.31	5311.55	1009.56	1625.93	654.379	1615.58	LOC101119356
gene2211	365.365	1.24105	0.32356	3.83562	0.000125246	0.000535427	730.677	428.345	475.59	351.33	204.941	231.052	135.62	CHRD
gene22130	3552.42	1.65771	0.214381	7.73256	1.05406e-14	1.20969e-12	6590.69	4534.26	6354.74	2064.58	1902.75	1520.42	1899.53	PLCD1
gene22132	1284.15	1.20552	0.306437	3.934	8.35435e-05	0.000375528	2579.26	1349.03	1767.33	788.425	1111.15	475.031	918.828	ACAA1
gene22133	124.434	1.74606	0.365573	4.77621	1.78626e-06	1.3546e-05	144.789	228.107	249.744	73.3659	88.387	30.6993	55.9434	MYD88
gene22142	274.206	-1.6667	0.310168	-5.37354	7.7206e-08	9.22587e-07	173.971	111.473	81.2565	428.829	261.276	470.184	392.451	SCN11A
gene22146	391.816	1.27501	0.251259	5.07449	3.88535e-07	3.65077e-06	506.199	647.162	614.204	327.563	239.908	224.589	183.087	GORASP1
gene2216	7526.36	2.0552	0.23034	8.92248	4.55956e-19	2.10725e-16	11587.6	13037.2	15261.9	4271.76	3186.79	2771.01	2568.31	EIF4G1
gene22161	323.726	-1.06029	0.267963	-3.95684	7.5947e-05	0.000346041	272.741	170.306	156.538	382.329	359.376	516.233	408.556	MYRIP
gene2217	4637.46	1.67937	0.257323	6.5263	6.7416e-11	2.22122e-09	8169.89	6160.94	8589.29	2409.71	2896.37	1490.53	2745.46	PSMD2
gene22172	1028.27	-1.11776	0.235424	-4.74785	2.05587e-06	1.52584e-05	653.232	742.12	452.886	1362.95	1148.06	1602.83	1235.84	ULK4
gene22181	5756.86	-1.16299	0.220369	-5.27747	1.30981e-07	1.4544e-06	3903.68	3687.89	2518.95	6392.14	8144.23	8464.11	7187.03	NKTR
gene22182	665.977	1.52632	0.281262	5.42669	5.74089e-08	7.21302e-07	1056.17	952.68	1177.02	422.629	519.638	230.245	303.451	ZBTB47
gene22188	139.241	-1.5042	0.364254	-4.12954	3.63484e-05	0.000182543	62.854	102.183	38.2384	246.964	123.353	220.55	180.545	HIGD1A
gene22191	20.4614	1.66317	0.508975	3.26768	0.00108431	0.00339033	34.7942	29.9325	35.8485	13.4332	12.6267	7.27088	9.3239	LOC106990281
gene22192	201.711	1.55624	0.387982	4.0111	6.04367e-05	0.000283608	240.192	292.1	438.546	139.499	170.946	48.4725	82.2198	LOC101119853
gene22195	231.135	1.4543	0.324866	4.4766	7.58422e-06	4.71601e-05	363.655	357.126	366.849	140.532	205.913	70.2852	113.582	POMGNT2
gene222	2489.17	-1.3417	0.237926	-5.63914	1.70902e-08	2.54344e-07	1068.52	1764.99	1144.76	2978.04	3195.53	4105.62	3166.73	RLF
gene22229	432.675	1.52577	0.320417	4.76181	1.91866e-06	1.4371e-05	1116.78	450.02	503.073	247.998	286.529	196.314	228.012	IL17RE
gene2223	862.206	1.33858	0.229702	5.82745	5.62817e-09	9.81452e-08	1505.13	1159.11	1286.96	606.561	574.03	377.278	526.376	ABCF3
gene22230	755.914	1.14729	0.358421	3.20096	0.0013697	0.00415502	1600.53	714.252	988.222	366.83	721.665	264.175	635.72	JAGN1
gene2224	2358.76	1.37665	0.261268	5.26909	1.37103e-07	1.51353e-06	3491.76	3243.03	4173.96	1604.75	1754.14	843.422	1400.28	AP2M1
gene22241	667.399	1.06396	0.209669	5.07448	3.88561e-07	3.65077e-06	919.239	967.13	965.518	563.161	435.136	442.716	378.889	BRPF1
gene22250	645.792	-1.23641	0.249705	-4.95148	7.36516e-07	6.32886e-06	328.861	471.695	290.373	728.493	1059.67	904.013	737.436	SRGAP3
gene22251	605.238	-1.133	0.225078	-5.03379	4.80888e-07	4.39507e-06	365.9	367.448	346.535	672.693	647.848	855.54	980.705	RAD18
gene22256	411.222	-1.86788	0.312938	-5.96883	2.38954e-09	4.74027e-08	170.604	233.267	86.0363	544.561	748.861	601.06	494.167	GRM7
gene22267	702.817	1.45187	0.243716	5.95722	2.56563e-09	5.03121e-08	911.383	1024.93	1370.61	497.028	443.878	332.845	339.051	BHLHE40
gene22283	495.422	-2.07032	0.243678	-8.49613	1.96011e-17	5.3203e-15	163.869	218.817	142.199	647.893	799.368	625.296	870.513	CNTN4
gene22287	1500.49	-1.11117	0.248709	-4.46774	7.90516e-06	4.8889e-05	602.725	1031.12	1073.06	2177.21	1556.97	2074.62	1987.69	CHL1
gene22288	43.8753	-1.72206	0.452633	-3.80453	0.000142071	0.000594279	21.3255	15.4823	20.3141	46.4995	36.9089	76.7482	89.8485	CNTN3
gene22290	11260.2	-1.07537	0.230469	-4.66602	3.07095e-06	2.16639e-05	5750.02	7665.82	7273.65	17929.2	11585.5	16670.5	11946.5	PDZRN3
gene22297	5242.78	-1.60111	0.276522	-5.7902	7.03034e-09	1.17287e-07	2455.79	3158.4	1659.78	5756.64	6233.71	10329.5	7105.66	FOXP1
gene22300	5502.78	-1.19935	0.189411	-6.332	2.42004e-10	6.80636e-09	3019.24	3260.58	3203.66	6855.06	6758.21	8817.16	6605.56	MITF
gene22311	201.306	-1.88415	0.340276	-5.53713	3.07468e-08	4.15957e-07	63.9764	119.73	53.7727	231.464	301.099	413.632	225.469	FAM19A4
gene22313	27.3811	-2.44295	0.542407	-4.5039	6.67176e-06	4.21296e-05	11.2239	7.22509	4.77979	28.933	35.9376	48.4725	55.0958	FAM19A1
gene22324	6460.92	-1.72805	0.241749	-7.14813	8.79703e-13	5.63405e-11	2717.31	3619.77	2011.1	9198.64	7813.02	11216.5	8650.03	MAGI1
gene22336	1354.57	-1.10839	0.209567	-5.28897	1.23005e-07	1.37566e-06	752.003	959.905	734.893	1818.65	1482.18	2056.04	1678.3	ATXN7
gene22344	203.42	-2.71074	0.504199	-5.37632	7.60247e-08	9.11017e-07	35.9166	48.5113	62.1373	123.999	107.813	576.823	468.738	CADPS
gene22347	2108.92	-1.34795	0.235314	-5.72829	1.01446e-08	1.60771e-07	937.198	1487.34	934.45	2462.41	3395.62	2803.33	2742.07	PTPRG
gene2235	4242.48	-1.11672	0.291474	-3.83128	0.000127477	0.0005432	2572.52	1694.8	3364.98	3693.1	6231.77	4744.65	7395.55	KLHL24
gene22352	3829.14	-1.96393	0.299684	-6.55334	5.62654e-11	1.88654e-09	2086.53	1481.14	754.013	5382.58	5354.7	4903	6842.05	FHIT
gene22353	222.094	-1.2904	0.281699	-4.58078	4.63256e-06	3.09563e-05	107.75	159.984	96.7908	241.798	266.132	295.683	386.518	C19H3orf67
gene22356	661.732	-1.62602	0.263813	-6.16351	7.11518e-10	1.71366e-08	318.759	374.673	211.506	1089.12	700.297	1083.36	854.408	FAM107A
gene22358	455.546	-2.02234	0.341257	-5.92617	3.10088e-09	5.88512e-08	207.643	214.688	74.0868	778.092	482.729	828.073	603.511	ACOX2
gene22376	288.693	1.41558	0.219703	6.44315	1.1702e-10	3.5861e-09	442.223	440.731	464.835	150.865	161.233	157.536	203.431	DNAH12
gene2238	913.601	-1.76132	0.267526	-6.58373	4.58802e-11	1.58816e-09	337.84	552.204	267.668	1385.69	1208.28	1520.42	1123.11	LOC101109765
gene22381	60.7523	-1.719	0.381774	-4.50267	6.71053e-06	4.23275e-05	32.5494	23.7396	22.704	54.7661	99.0712	85.6348	106.801	ASB14
gene22385	1884.57	-1.21979	0.205826	-5.92629	3.09861e-09	5.88512e-08	1077.5	1297.42	837.659	2413.84	2439.87	2598.94	2526.78	ARHGEF3
gene22389	406.846	-2.17874	0.340317	-6.40208	1.53271e-10	4.57404e-09	169.481	170.306	64.5272	407.129	555.576	773.137	707.769	ERC2
gene22396	1742.27	-2.33708	0.337245	-6.92992	4.21083e-12	2.1178e-10	540.993	805.082	229.43	2756.91	2233.96	3298.56	2330.97	CACNA2D3
gene2240	23.5922	-1.52995	0.522425	-2.92856	0.00340534	0.00904635	8.97914	16.5145	8.36464	40.2996	23.3109	37.1623	30.5146	LOC105603001
gene22400	344.727	-1.0785	0.319836	-3.37204	0.000746137	0.0024674	195.296	293.132	143.394	600.361	320.524	533.198	327.184	IL17RB
gene22402	176.753	-1.32036	0.348719	-3.78633	0.00015289	0.000633953	90.9138	147.598	46.603	199.431	296.242	231.86	224.621	CACNA1D
gene22404	4889.04	1.48265	0.25368	5.84456	5.07898e-09	9.02812e-08	10530.3	5169.04	7469.62	2941.87	2909.97	2279.02	2923.47	TKT
gene22425	1025.46	1.01009	0.199361	5.06664	4.04905e-07	3.77734e-06	1625.22	1310.84	1382.56	714.026	817.823	612.37	715.397	NT5DC2
gene22426	544.996	1.69357	0.399627	4.23787	2.25653e-05	0.000120659	524.157	1346.96	829.294	486.695	305.955	176.117	145.792	STAB1
gene22429	250.673	2.37097	0.332911	7.12192	1.06437e-12	6.57066e-11	338.963	544.978	510.243	110.566	131.124	65.4379	53.4005	SEMA3G
gene22431	707.255	1.76945	0.249557	7.0904	1.33728e-12	7.9956e-11	1047.19	1096.15	1414.82	411.263	395.313	234.284	351.765	BAP1
gene22439	408.937	1.27929	0.255476	5.00748	5.51471e-07	4.96098e-06	650.988	590.393	605.839	230.431	333.151	172.885	278.869	TWF2
gene22441	1394.01	1.29904	0.211404	6.14483	8.00477e-10	1.89063e-08	2045	1745.38	2538.07	966.157	912.037	769.098	782.36	ALAS1
gene22446	481.956	1.16546	0.313963	3.71209	0.000205553	0.000812706	1041.58	546.011	528.167	249.031	445.82	235.9	327.184	ACY1
gene22448	1548.69	1.35568	0.317168	4.27431	1.91732e-05	0.000105185	2757.72	1280.91	3088.94	754.326	1205.37	658.419	1095.13	ABHD14B
gene22450	658.396	1.0264	0.256101	4.00779	6.12887e-05	0.000287212	1245.86	695.673	843.634	481.528	526.437	357.081	458.566	PCBP4
gene22451	50.4259	1.2228	0.385585	3.17127	0.00151775	0.00454606	95.4034	52.64	76.4767	34.0997	36.9089	21.0048	36.448	GPR62
gene22463	2222.97	1.21236	0.278039	4.3604	1.29823e-05	7.51815e-05	4609.67	2051.93	3215.61	1368.12	1673.53	1105.17	1536.75	TEX264
gene22469	639.23	1.57709	0.234987	6.71139	1.92773e-11	7.6661e-10	984.338	933.069	1174.63	369.93	405.026	243.978	363.632	RBM15B
gene22475	1304.23	1.02411	0.19243	5.32197	1.02648e-07	1.17962e-06	2094.38	1676.22	1743.43	1018.86	836.277	845.846	914.59	MAPKAPK3
gene22476	855.249	1.24964	0.229006	5.45679	4.84816e-08	6.20071e-07	1557.88	1045.57	1231.99	545.595	642.991	434.637	528.072	CISH
gene22481	1261.6	1.4975	0.259198	5.77745	7.58432e-09	1.25185e-07	2414.27	1589.52	1994.37	661.327	950.889	494.42	726.416	TMEM115
gene22482	275.07	1.27622	0.293477	4.34862	1.36994e-05	7.86637e-05	584.766	319.968	336.975	153.965	209.798	128.452	191.564	LOC101120446
gene22486	450.367	1.01118	0.26907	3.75805	0.000171242	0.000698364	684.659	571.815	640.492	339.963	359.376	185.004	371.261	HYAL2
gene22487	485.752	1.36841	0.264426	5.17501	2.27904e-07	2.33642e-06	838.427	596.586	806.59	363.73	318.582	189.851	286.498	HYAL1
gene22490	1005.17	1.28213	0.245388	5.22492	1.74234e-07	1.86212e-06	2024.8	1185.95	1333.56	686.126	640.077	495.228	670.473	IFRD2
gene22492	3084.82	1.10022	0.27716	3.96961	7.19916e-05	0.000330216	4606.3	3998.57	4708.1	2155.51	2945.91	1190	1989.38	GNAI2
gene22494	439.471	1.923	0.27127	7.08889	1.3519e-12	8.05486e-11	941.687	505.757	828.099	251.097	204.941	177.733	166.983	SLC38A3
gene22496	1382.57	1.90755	0.279248	6.83102	8.43121e-12	3.85491e-10	2388.45	2253.2	2497.44	954.79	678.929	484.725	420.423	SEMA3F
gene22500	227.641	1.04844	0.270855	3.87085	0.000108458	0.000471319	332.228	331.322	304.712	173.598	202.027	147.033	102.563	MST1R
gene22510	618.006	1.03877	0.223088	4.65633	3.21894e-06	2.26145e-05	1035.97	833.982	752.818	472.229	489.528	382.125	359.394	GMPPB
gene22514	923.666	1.28062	0.218603	5.85819	4.67942e-09	8.46751e-08	1738.59	1188.01	1247.53	654.093	567.231	506.538	563.672	APEH
gene22517	4459.54	1.34558	0.204998	6.56385	5.24343e-11	1.77902e-09	6668.13	6400.4	7405.1	3310.77	2781.76	2211.96	2438.62	DAG1
gene22521	388.138	1.12926	0.274844	4.10872	3.9785e-05	0.000197152	730.677	424.216	532.947	228.364	350.634	206.008	244.117	TCTA
gene22526	87.2665	-1.19469	0.335013	-3.5661	0.000362331	0.0013293	51.6301	62.9615	35.8485	106.432	131.124	138.955	83.9151	CCDC36
gene22527	485.139	1.44421	0.287751	5.01896	5.19516e-07	4.71786e-06	876.588	594.522	807.785	240.764	402.112	181.772	292.431	CCDC71
gene22532	2231.55	1.44019	0.225204	6.39505	1.60498e-10	4.74831e-09	3519.82	3097.5	3856.1	1522.08	1519.09	1121.33	984.943	LAMB2
gene22533	1188.92	1.2762	0.247672	5.15279	2.56646e-07	2.57852e-06	1589.31	1984.84	1792.42	1056.06	667.273	652.764	579.777	USP19
gene22534	2930.08	1.24748	0.274957	4.53702	5.7056e-06	3.68869e-05	5072.09	3288.45	4773.82	1710.15	2266.98	1135.87	2263.16	QARS
gene22537	1896.12	1.14067	0.230645	4.94555	7.59286e-07	6.49839e-06	3349.22	2489.56	2431.72	1307.15	1447.22	912.092	1335.86	IMPDH2
gene22542	1411.22	1.04551	0.243099	4.30077	1.70206e-05	9.46818e-05	1805.93	2285.19	1909.53	1256.52	1065.5	869.274	686.578	WDR6
gene2255	170.251	-1.54838	0.348905	-4.43782	9.08758e-06	5.51642e-05	92.0362	112.505	38.2384	215.964	192.315	311.84	228.859	CCDC39
gene22550	459.055	1.29865	0.25665	5.06	4.19249e-07	3.89416e-06	879.956	553.236	650.052	339.963	325.381	235.092	229.707	NCKIPSD
gene22554	2580.55	1.39114	0.309392	4.49635	6.91295e-06	4.34601e-05	5243.82	2973.64	3758.11	1301.99	2175.68	863.619	1746.96	LOC101110095
gene22555	1540.61	1.07725	0.297802	3.61735	0.000297634	0.00112055	3170.76	1930.13	1506.83	1250.32	1300.55	914.515	711.159	COL7A1
gene22558	1223.31	1.08983	0.284541	3.83012	0.000128082	0.000544555	2220.09	1548.23	1496.08	813.225	1218.96	546.124	720.483	SHISA5
gene2256	3774.88	-1.06048	0.278028	-3.81429	0.000136575	0.000574238	3155.05	2216.04	1617.96	3318	4737.93	5155.05	6224.13	TTC14
gene22560	331.632	1.02821	0.268128	3.83479	0.000125669	0.000536699	585.889	492.339	325.026	278.997	213.683	241.555	183.935	ATRIP
gene22563	1573.35	1.34917	0.246708	5.4687	4.53342e-08	5.83591e-07	2573.65	2510.2	2144.93	1347.45	836.277	883.008	717.94	PLXNB1
gene22565	38.8814	-2.0235	0.436271	-4.63818	3.51493e-06	2.43537e-05	19.0807	10.3216	13.1444	46.4995	54.392	71.0931	57.6386	SPINK8
gene22579	3752.28	1.18496	0.208005	5.69677	1.22101e-08	1.88952e-07	6264.07	4981.19	5310.35	2827.17	2723.49	2093.21	2066.51	DHX30
gene22583	1341.08	1.55228	0.226136	6.86438	6.67797e-12	3.13707e-10	2644.36	1885.75	1922.67	855.591	822.679	613.178	643.349	SCAP
gene22584	499.708	1.30819	0.249546	5.24228	1.58601e-07	1.71217e-06	858.63	789.6	624.958	383.363	281.673	338.5	221.231	PTPN23
gene22591	778.521	1.04007	0.244619	4.25181	2.12054e-05	0.000114606	1419.83	877.333	1008.54	552.828	618.709	409.593	562.824	LOC101114909
gene22592	1338.88	1.47184	0.257436	5.71729	1.08237e-08	1.69958e-07	2006.84	2137.6	2184.37	1091.19	664.36	769.098	518.748	NBEAL2
gene22605	643.487	1.06003	0.260558	4.06832	4.73543e-05	0.000230111	1020.25	1068.28	658.417	556.961	355.491	483.918	361.089	ALS2CL
gene22611	28.1066	2.11178	0.708994	2.97856	0.00289606	0.00787197	11.2239	105.28	33.4586	18.5998	17.4831	6.46301	4.23814	LTF
gene22621	2656.46	1.25491	0.215889	5.81273	6.14619e-09	1.05841e-07	3977.76	3214.13	4737.97	1623.35	2022.22	1505.07	1514.71	FYCO1
gene22635	2789.38	1.34482	0.378427	3.55371	0.00037984	0.00138493	5836.44	2304.8	4662.69	1303.02	3024.58	939.559	1454.53	CLEC3B
gene22638	396.927	1.42316	0.294429	4.83364	1.34059e-06	1.05933e-05	798.021	418.023	639.297	250.064	300.127	155.112	217.84	LOC106991758
gene22642	481.722	1.9149	0.236519	8.09618	5.67102e-16	9.89535e-14	940.565	928.941	621.373	218.031	245.735	233.476	183.935	ATP2B2
gene22649	3056.64	-1.11359	0.246689	-4.51415	6.35709e-06	4.04113e-05	2101.12	2159.27	1246.33	4523.89	3297.52	4517.64	3550.71	ATG7
gene22659	608.922	1.3559	0.262228	5.17067	2.3326e-07	2.37901e-06	722.821	1032.16	1046.77	484.628	380.744	338.5	256.831	PLXND1
gene2267	1079.03	-1.29569	0.224039	-5.78334	7.32306e-09	1.21459e-07	538.748	617.229	611.814	1087.06	1442.36	1441.25	1814.77	KCNMB3
gene22675	2372.26	-1.2521	0.284235	-4.40517	1.05703e-05	6.30236e-05	1947.35	1004.29	1025.27	2324.98	3214.96	4042.61	3046.37	PPARG
gene2269	1368.5	-1.43648	0.238427	-6.02483	1.69291e-09	3.55635e-08	488.241	850.497	739.673	1639.88	1746.37	1903.36	2211.46	PIK3CA
gene22694	2767.16	1.1752	0.256105	4.58873	4.45949e-06	2.99048e-05	2763.33	4286.54	5128.72	2236.11	1846.41	1414.59	1694.41	TMEM43
gene22698	1512.7	2.36374	0.319722	7.3931	1.43441e-13	1.1907e-11	2363.76	2658.83	3386.48	747.092	753.718	360.313	318.708	FBLN2
gene22699	674.289	1.33687	0.292314	4.57341	4.79848e-06	3.18656e-05	1529.82	728.702	830.489	415.396	505.069	305.377	405.166	HDAC11
gene22702	98.4203	1.8778	0.372107	5.04638	4.50263e-07	4.13951e-06	97.6481	212.624	194.777	70.266	35.9376	40.3938	37.2956	IQSEC1
gene22703	3847.84	1.54883	0.281594	5.50023	3.79304e-08	4.99314e-07	8643.54	5600.48	4258.8	1894.08	2181.51	1556.78	2799.71	ACAD9
gene22709	2781.41	1.58352	0.23946	6.61288	3.76902e-11	1.33058e-09	4736.5	4082.18	4655.52	1632.65	1860.01	982.377	1520.64	COPG1
gene2271	59.189	-2.76491	0.443736	-6.23099	4.63511e-10	1.18123e-08	17.9583	12.3859	10.7545	141.565	59.2484	79.1718	93.239	KCNMB2
gene22711	4232.74	1.44946	0.328803	4.40828	1.04197e-05	6.22777e-05	9603.19	4436.21	5869.59	2087.31	3415.04	1360.46	2857.35	LOC101106288
gene22712	4207.4	1.00165	0.201459	4.97195	6.62814e-07	5.78567e-06	6644.56	5077.18	5956.82	3284.93	3273.23	2488.26	2726.82	RAB7A
gene22713	4844.94	1.15593	0.237924	4.85841	1.18331e-06	9.52217e-06	7847.77	5773.88	7596.29	3311.8	3595.7	2156.22	3632.93	RPN1
gene22720	1465.1	1.23073	0.240923	5.10838	3.24931e-07	3.12856e-06	2907	1764.99	1867.7	1008.52	984.884	735.975	986.638	RUVBL1
gene22721	4063.48	1.51172	0.215125	7.02715	2.1079e-12	1.17411e-10	7274.23	5389.92	6716.81	2569.87	2530.2	1760.36	2202.98	SEC61A1
gene22740	52.6799	-1.70573	0.461834	-3.69337	0.000221297	0.000867336	17.9583	34.0612	16.7293	58.8994	52.4494	58.9749	129.687	KHDRBS2
gene22747	1253.7	-1.29013	0.231429	-5.57465	2.48031e-08	3.48507e-07	787.919	780.31	491.124	1538.62	1488.98	1772.48	1916.48	PRIM2
gene22777	982.368	1.38735	0.289267	4.79609	1.61794e-06	1.24569e-05	1624.1	1056.93	1873.68	536.295	816.851	381.317	587.406	TAP2
gene2278	12608.5	-2.8392	0.269915	-10.5189	7.07136e-26	1.72743e-22	3495.13	3257.49	1619.16	16496	21985.1	19277.5	22129	NAALADL2
gene22787	891.281	1.28472	0.232476	5.52622	3.27203e-08	4.39181e-07	1717.26	1098.21	1216.46	567.294	614.824	445.14	579.777	RXRB
gene22788	980.581	1.63856	0.263058	6.22892	4.69659e-10	1.19157e-08	1877.76	1257.17	1670.54	508.395	684.757	344.155	521.291	SLC39A7
gene22790	1516.73	1.29171	0.267045	4.83704	1.31787e-06	1.04477e-05	3054.03	1873.36	1945.38	1219.32	1045.1	723.857	756.083	RING1
gene22793	568.76	1.44817	0.349368	4.14512	3.39629e-05	0.000172078	1342.38	479.953	851.998	293.464	433.194	195.506	384.823	B3GALT4
gene22796	2369.25	1.06247	0.203813	5.21298	1.85827e-07	1.95427e-06	3857.66	3212.07	3051.9	1842.41	1794.94	1399.24	1426.56	RGL2
gene22797	1615.16	1.76141	0.242966	7.24961	4.17964e-13	2.99046e-11	2694.86	2234.62	3184.54	852.491	1045.1	617.217	677.254	TAPBP
gene22798	251.194	1.66004	0.296826	5.59263	2.23656e-08	3.17915e-07	483.751	316.872	436.156	108.499	142.779	88.0585	182.24	ZBTB22
gene22799	758.496	1.03741	0.200833	5.16554	2.39749e-07	2.4374e-06	1131.37	1060.02	1026.46	581.761	585.685	442.716	481.452	DAXX
gene22808	419.035	1.34711	0.288568	4.66826	3.03763e-06	2.14731e-05	810.367	499.564	614.204	257.297	325.381	153.496	272.936	BAK1
gene2281	2133.13	-3.24267	0.318672	-10.1756	2.5491e-24	4.35896e-21	535.381	370.544	189.997	2318.78	3935.65	3627.36	3954.18	NLGN1
gene22818	1589.98	1.27692	0.19202	6.6499	2.93295e-11	1.08089e-09	2263.87	2347.12	2567.94	1118.06	966.429	828.073	1038.34	HMGA1
gene22826	35.568	1.4774	0.43573	3.39064	0.000697292	0.00233021	47.1405	50.5757	70.502	29.9664	14.5693	21.8126	14.4097	PACSIN1
gene22827	594.926	2.43925	0.319264	7.64021	2.16862e-14	2.18138e-12	1425.44	1182.85	733.698	196.331	321.496	164.807	139.858	SPDEF
gene2285	6.30202	-4.75177	1.47354	-3.22474	0.00126086	0.00386254	0	1.03216	0	9.29991	13.598	3.2315	16.9525	SPATA16
gene22855	51.5258	-2.59684	0.42399	-6.12475	9.08236e-10	2.11017e-08	13.4687	16.5145	9.55959	99.199	73.8177	90.4821	57.6386	LHFPL5
gene22874	3570.52	1.63497	0.235687	6.93705	4.00366e-12	2.03153e-10	6395.39	4504.33	6586.56	1969.51	2100.89	1346.73	2090.25	CDKN1A
gene22881	3915.97	1.16866	0.211361	5.52921	3.21674e-08	4.32438e-07	5826.34	5151.49	6228.07	2804.44	2772.05	1884.77	2744.62	MTCH1
gene22884	767.791	1.43376	0.227907	6.29102	3.15395e-10	8.52015e-09	913.627	1167.37	1517.58	485.662	404.055	455.642	430.595	PIM1
gene22894	5808.26	-1.25456	0.218453	-5.74292	9.30597e-09	1.49701e-07	3188.72	4019.22	2515.37	7104.1	7073.88	9031.24	7725.27	ZFAND3
gene22897	4977.12	-1.28362	0.232798	-5.5139	3.50962e-08	4.66313e-07	2860.98	3218.26	2125.81	5873.41	5699.51	8640.23	6421.62	BTBD9
gene22902	45.8436	1.16817	0.392212	2.97842	0.00289741	0.0078744	67.3435	48.5113	86.0363	20.6665	28.1673	37.9702	32.2098	GLP1R
gene22907	48.3885	-1.36448	0.463646	-2.94295	0.00325106	0.00870001	22.4478	38.1898	15.5343	39.2663	74.789	48.4725	100.02	KIF6
gene22930	697.21	1.29028	0.265721	4.85576	1.19925e-06	9.62323e-06	1416.46	815.403	926.085	521.828	490.499	381.317	328.879	MDFI
gene22934	1919.59	1.07338	0.246559	4.35343	1.34025e-05	7.71662e-05	3465.95	2313.06	2446.06	1204.85	1687.12	979.953	1340.1	PRICKLE4
gene22937	655.16	1.07725	0.204685	5.26297	1.41743e-07	1.55649e-06	1093.21	858.754	857.973	462.929	470.102	383.741	459.414	BYSL
gene22938	481.751	1.43413	0.251738	5.69689	1.22011e-08	1.88952e-07	827.203	659.548	770.742	280.031	366.175	193.082	275.479	CCND3
gene22940	1720.9	1.21823	0.193515	6.29527	3.06862e-10	8.32911e-09	2389.57	2519.49	2748.38	1301.99	972.257	1106.79	1007.83	C20H6orf132
gene2295	920.607	-1.00596	0.187654	-5.36071	8.2894e-08	9.78928e-07	574.665	538.786	639.297	1100.49	1121.84	1170.61	1298.56	PLD1
gene22954	615.331	1.06445	0.252044	4.22328	2.40773e-05	0.00012759	1180.76	719.413	730.114	378.196	491.471	353.042	454.328	CNPY3
gene22955	868.171	1.09093	0.328878	3.31713	0.000909465	0.00291834	1711.65	937.198	1088.6	575.561	679.9	289.22	795.074	GNMT
gene22957	994.208	1.43708	0.245624	5.85074	4.89385e-09	8.74796e-08	1514.11	1502.82	1645.44	618.96	753.718	386.165	538.243	PPP2R5D
gene2296	1288.67	-1.29814	0.256258	-5.06576	4.06774e-07	3.79271e-06	713.842	905.201	488.734	1406.35	1615.25	2173.19	1718.14	TNIK
gene22961	1515.41	2.13395	0.275689	7.74042	9.90902e-15	1.16058e-12	2100	2745.54	3289.69	924.824	571.116	494.42	482.3	CUL7
gene22966	499.643	1.36213	0.239185	5.69488	1.23462e-08	1.90542e-07	625.173	876.301	800.616	379.23	308.869	249.634	257.679	SRF
gene22975	187.621	1.10303	0.312973	3.52437	0.000424488	0.00152048	396.205	169.274	244.964	113.666	142.779	107.447	139.011	DLK2
gene22977	1496.76	1.31018	0.293054	4.47078	7.79349e-06	4.82857e-05	2912.61	1754.67	2146.13	817.358	1209.25	540.469	1096.83	YIPF3
gene22981	885.068	1.12533	0.227117	4.95486	7.23841e-07	6.23247e-06	1069.64	1367.61	1407.65	732.626	506.04	623.68	488.233	GTPBP2
gene2299	1310.35	-1.22821	0.2846	-4.31555	1.59205e-05	8.95394e-05	925.974	653.355	645.272	1097.39	1724.03	1597.98	2528.47	RPL22L1
gene22990	1720.17	1.05432	0.205864	5.12143	3.03233e-07	2.95289e-06	2701.6	2125.21	2505.81	1396.02	1186.91	1158.49	967.143	TMEM63B
gene22992	1077.66	1.45138	0.268009	5.41541	6.11494e-08	7.57668e-07	2209.99	1174.59	1686.07	671.66	761.488	452.41	587.406	SLC29A1
gene22994	21725.7	1.28796	0.283225	4.54748	5.42921e-06	3.54079e-05	41623.9	25882.3	30860.7	12311	16779.9	7943.84	16677.9	HSP90AB1
gene22999	244.234	1.50705	0.226163	6.66355	2.67294e-11	1.00235e-09	405.184	406.67	351.315	141.565	156.377	117.142	131.382	AARS2
gene23	30.4089	1.7872	0.534311	3.34486	0.000823244	0.00268398	58.3644	72.2509	22.704	22.7331	9.71286	17.7733	9.3239	AGXT
gene23003	1355.44	-1.60362	0.297722	-5.38632	7.19166e-08	8.70328e-07	636.397	858.754	382.384	1257.55	2023.19	1961.52	2368.27	SUPT3H
gene23006	860.042	-1.60718	0.263007	-6.11077	9.9149e-10	2.27272e-08	328.861	556.332	303.517	1006.46	1169.43	1496.99	1158.71	RUNX2
gene23029	32.8843	-1.98454	0.462626	-4.28972	1.78897e-05	9.89052e-05	14.5911	11.3537	10.7545	34.0997	60.2197	51.704	47.4671	PTCHD4
gene23033	440.659	-1.04281	0.264487	-3.94276	8.05484e-05	0.000364206	295.189	279.714	248.549	394.729	503.126	579.247	784.055	CENPQ
gene23052	896.298	1.55916	0.228287	6.82984	8.50069e-12	3.87631e-10	1422.07	1445.02	1451.86	522.861	553.633	334.461	544.177	MCM3
gene23094	6.78048	-3.28266	1.12937	-2.90662	0.00365356	0.00959249	1.12239	0	2.3899	8.26658	12.6267	13.7339	9.3239	LOC105603754
gene23103	140.479	1.07345	0.293585	3.65636	0.000255826	0.000984833	200.908	210.56	189.997	88.8658	139.865	74.3246	78.8293	GPSM3
gene23104	1495.44	1.05572	0.219155	4.81723	1.45566e-06	1.13817e-05	2046.12	1974.51	2356.44	1135.62	1056.76	742.438	1156.16	PBX2
gene23109	1812.57	1.38155	0.222502	6.20915	5.32719e-10	1.31987e-08	3302.08	2127.27	2963.47	1150.09	1167.49	1100.33	877.294	PPT2
gene23110	90.8158	1.23877	0.338767	3.6567	0.000255481	0.000983726	184.072	93.9262	127.859	75.4326	59.2484	46.8568	48.3147	PRRT1
gene23112	1288.39	1.41705	0.209864	6.75224	1.45584e-11	5.99876e-10	2111.22	1838.27	2064.87	907.258	814.909	625.296	656.911	ATF6B
gene23114	800.519	2.82853	0.263706	10.7261	7.67761e-27	2.47592e-23	1624.1	1205.56	1888.02	221.131	284.587	231.052	149.182	TNXB
gene23115	30.358	1.52016	0.476136	3.1927	0.00140947	0.00425303	39.2837	58.8329	46.603	23.7664	19.4257	16.9654	7.62864	LOC101123159
gene23117	253.346	1.98936	0.406487	4.89403	9.87903e-07	8.157e-06	395.082	524.335	407.477	198.398	96.1573	115.526	36.448	LOC101123419
[truncated: 2,113 more rows]
