# Supplementary material for: Transcriptome Analysis Reveals Candidate Genes Regulating the Skin and Hair Diversity of Xinji Fine-Wool Sheep and Tan Sheep
Source: MDPI journal article supplement (doi:10.3390/agriculture12010015), 2021-12-23
Supplement: s1 [file s1 › Supplementary Table S8.xls]

## Sheet: Sheet1
Table S8 | Statistics of the number of upregulated and downregulated DEGs.
	12-m-XFWS vs. 3-m-XFWS	12-m-XFWS vs.12-m -TS
Up	2364	1035
Down	1747	1044
Toal	4111	2079
