# Supplementary material for: Transcriptome Analysis Reveals Candidate Genes Regulating the Skin and Hair Diversity of Xinji Fine-Wool Sheep and Tan Sheep
Source: MDPI journal article supplement (doi:10.3390/agriculture12010015), 2021-12-23
Supplement: s1 [file s1 › Supplementary Table S9.xlsx]

## Sheet: Supplementary Table S9
Table S9 | Statistics of the DEGs in 12-m-XFWS vs. 12-m-TS.
Row.names	baseMean	log2FC	lfcSE	stat	pvalue	p_value	X1	X2	X3	S1	S2	S3	S4	name	significant
gene10	430.236	0.701473	0.292665	2.39684	0.016537	0.034659	700.373	571.815	382.384	442.262	234.08	394.243	286.498	BOK	no
gene10000	4565.35	1.4403	0.34966	4.11914	3.8e-05	0.000189922	5671.45	5740.85	10016.1	2783.77	4256.17	1269.17	2219.94	CD74	up
gene10001	30747.1	0.116573	0.253191	0.460416	0.645218	0.724065	45645.5	22092.3	28785.1	27618.7	31298.7	27248.8	32540.4	RPS14	no
gene10003	2748.23	-0.0295981	0.249106	-0.118817	0.90542	0.931682	2245.91	3135.69	2766.31	3382.07	2392.28	3361.57	1953.78	NDST1	no
gene10004	1098.91	0.855236	0.26325	3.24876	0.00115908	0.00358933	1057.29	1597.78	1773.3	986.823	693.498	975.914	607.749	SYNPO	no
gene10005	1342.29	1.05837	0.205497	5.15031	2.6e-07	2.6e-06	1987.76	1689.64	2050.53	997.157	1074.24	796.565	800.16	MYOZ3	up
gene10006	1088.91	0.67092	0.202214	3.31787	0.000907066	0.00291119	1280.65	1336.64	1530.73	943.424	881.928	698.813	950.19	RBM22	no
gene10007	3040.53	0.00870332	0.208317	0.0417791	0.966675	0.977016	2450.18	2980.87	3722.26	3178.5	2779.82	2832.41	3339.65	DCTN4	no
gene10008	312.876	0.264638	0.225487	1.17363	0.240543	0.330305	396.205	357.126	284.398	277.964	314.697	252.057	307.689	SMIM3	no
gene1001	964.598	-0.747545	0.244642	-3.05566	0.00224562	0.00634713	535.381	883.526	665.586	1388.79	942.147	1295.02	1041.73	IGSF3	no
gene10011	84.9644	-1.082	0.339922	-3.18307	0.00145722	0.00438164	46.0181	73.2831	35.8485	105.399	109.755	89.6742	134.773	ZNF300	down
gene10013	1455.07	1.54087	0.255487	6.0311	1.63e-09	3.47e-08	2587.11	1943.55	2453.23	965.124	969.343	518.656	748.455	GPX3	up
gene10014	1525.22	1.08818	0.214387	5.07577	3.86e-07	3.63e-06	2456.92	1760.86	2343.29	1154.22	1132.52	853.925	974.771	TNIP1	up
gene10016	1082.02	1.11043	0.277776	3.99756	6.4e-05	0.000298605	1317.69	1712.35	1651.42	936.191	933.406	500.075	522.986	ANXA6	up
gene10017	37.2687	0.93856	0.441942	2.12372	0.0336936	0.0635798	35.9166	79.476	38.2384	24.7998	33.0237	29.0835	20.3431	CCDC69	no
gene10018	22.8712	-0.685648	0.587834	-1.1664	0.243453	0.333685	13.4687	12.3859	25.0939	49.5995	12.6267	28.2757	18.6478	GM2A	no
gene10019	135.588	-1.19209	0.271439	-4.39173	1.12e-05	6.63e-05	93.1586	65.0258	76.4767	182.898	194.257	190.659	146.639	SLC36A3	down
gene1002	71.8443	0.393722	0.478071	0.823564	0.410188	0.510235	49.3853	85.669	114.715	69.2326	49.5356	111.487	22.8859	CD2	no
gene10020	507.354	0.403423	0.257085	1.56922	0.116597	0.181628	679.047	478.92	610.619	554.894	379.773	521.888	326.336	SLC36A2	no
gene10022	820.393	-0.832971	0.296485	-2.80948	0.00496209	0.0124947	448.957	696.705	555.651	1210.02	761.488	1412.17	657.759	SLC36A1	no
gene10024	1817.03	0.0558345	0.20104	0.277728	0.781221	0.835871	1972.04	1769.12	1830.66	2088.35	1607.48	1963.14	1488.43	FAT2	no
gene10026	32981.8	0.936286	0.388036	2.41288	0.0158269	0.0333827	34831.2	30163.7	71070.8	25724.6	40227.7	10858.7	17996	SPARC	no
gene10027	2933.13	-0.494825	0.279196	-1.77232	0.0763414	0.127397	3498.5	1515.21	2118.64	2647.37	3680.2	3630.59	3441.37	ATOX1	no
gene10028	2621.73	-0.559217	0.207152	-2.69955	0.00694339	0.0166595	2267.23	2012.7	1910.72	2637.04	2731.26	2956.83	3836.36	G3BP1	no
gene10029	6.06396	-1.28666	0.953124	-1.34994	0.177034	0.256005	4.48957	3.09647	2.3899	4.13329	13.598	10.5024	4.23814	GLRA1	no
gene1003	1869.98	0.946079	0.265234	3.56697	0.000361139	0.00132635	1867.66	2754.82	3112.84	1762.85	1493.84	1068.01	1029.87	PTGFRN	no
gene10030	860.522	1.3913	0.33117	4.20118	2.66e-05	0.000138771	1490.54	1018.74	1484.13	447.429	733.321	237.515	611.987	LOC105615377	up
gene10031	2.90168	-0.689735	1.47619	-0.467241	0.640327	0.719921	2.24478	4.12862	0	3.09997	6.799	4.03938	0	LOC101107700	no
gene10032	47.1888	-0.71612	0.71645	-0.999539	0.317534	0.414586	34.7942	42.3184	26.2889	20.6665	153.463	46.8568	5.93339	NMUR2	no
gene10035	492.488	-1.58867	0.281674	-5.6401	1.7e-08	2.53e-07	242.437	299.325	145.784	582.794	693.498	891.087	592.491	GRIA1	down
gene10037	1309.45	-0.537996	0.179144	-3.00315	0.00267201	0.00734235	1051.68	1047.64	1022.88	1530.35	1330.66	1564.86	1618.12	FAM114A2	no
gene10038	454.762	-0.0139678	0.320337	-0.0436034	0.965221	0.976065	230.09	470.663	656.027	577.628	382.687	431.406	434.833	MFAP3	no
gene10039	341.559	-0.154497	0.25556	-0.604541	0.545484	0.63747	225.601	326.161	411.062	356.496	335.094	415.248	321.251	GALNT10	no
gene1004	116.712	-1.72978	0.387024	-4.46943	7.84e-06	4.86e-05	41.5285	76.3796	32.2636	214.931	142.779	212.471	96.6295	CD101	down
gene10043	2084.7	1.24835	0.195567	6.38325	1.73e-10	5.1e-09	2652.21	3279.16	3415.16	1522.08	1249.07	1271.6	1203.63	LARP1	up
gene10045	28.4863	-1.29521	0.532869	-2.43064	0.015072	0.0320323	16.8359	24.7717	4.77979	39.2663	33.995	50.0883	29.6669	FAXDC2	no
gene10046	876.844	-0.106364	0.184502	-0.576494	0.564281	0.654095	817.102	775.149	928.475	929.991	835.306	933.904	917.98	CNOT8	no
gene10047	630.901	0.23928	0.185632	1.28901	0.197396	0.280145	728.433	682.255	663.196	543.528	612.881	564.705	621.311	GEMIN5	no
gene10048	1737.14	-1.19317	0.21126	-5.64791	1.62e-08	2.43e-07	1108.92	1066.22	828.099	1853.78	2370.91	2296.79	2635.27	MRPL22	down
gene1005	598.616	0.183059	0.195953	0.934197	0.350202	0.448507	601.602	682.255	642.882	647.893	508.954	539.661	567.063	TTF2	no
gene10051	1076.26	-2.18027	0.312423	-6.97856	2.98e-12	1.58e-10	470.282	399.444	199.556	1031.26	1966.85	1575.36	1891.06	SGCD	down
gene10054	40.5714	-1.65926	0.446836	-3.71337	0.00020452	0.000809183	21.3255	16.5145	16.7293	30.9997	76.7316	58.9749	62.7244	LOC105611754	down
gene10056	69.296	0.152287	0.443612	0.343288	0.731382	0.796093	49.3853	76.3796	94.4009	86.7991	103.928	42.8174	31.3622	TIMD4	no
gene1006	224.602	-0.164867	0.277691	-0.593707	0.552708	0.643734	166.114	245.653	218.676	170.498	251.563	307.801	211.907	TRIM45	no
gene10062	43.3215	-0.564928	0.520487	-1.08538	0.277753	0.372165	10.1015	29.9325	62.1373	68.1993	34.9663	42.8174	55.0958	HAVCR2	no
gene10063	794.986	-0.445688	0.197242	-2.2596	0.0238463	0.047256	692.516	625.487	658.417	850.425	860.559	809.491	1068.01	MED7	no
gene10065	188.512	0.201106	0.313845	0.640782	0.521664	0.616011	140.299	189.917	280.813	200.465	163.176	121.989	222.926	ITK	no
gene10066	2576.34	1.00326	0.211774	4.73741	2.16e-06	1.6e-05	3574.82	2834.3	4421.31	1907.51	1941.6	1741.78	1613.03	CYFIP2	up
gene10068	1163.44	1.01208	0.222301	4.55273	5.3e-06	3.46e-05	1581.45	1466.69	1854.56	984.757	640.077	721.433	895.094	NIPAL4	up
gene10069	392.866	-0.293275	0.290756	-1.00866	0.313137	0.409784	212.132	439.699	391.943	554.894	362.29	431.406	357.699	ADAM19	no
gene1007	1076.14	-0.371263	0.262592	-1.41384	0.157408	0.232282	744.146	891.783	1129.23	1295.79	897.468	1612.52	962.057	VTCN1	no
gene10070	2.6908	-0.450891	1.45479	-0.309936	0.75661	0.816468	4.48957	1.03216	1.19495	2.06665	0	2.42363	7.62864	SOX30	no
gene10071	401.13	-0.252235	0.220954	-1.14157	0.253632	0.345338	396.205	336.483	352.51	458.795	334.122	466.144	463.652	THG1L	no
gene10072	265.577	-0.0917819	0.246008	-0.373085	0.709085	0.77744	191.929	254.943	321.441	250.064	261.276	283.564	295.822	LSM11	no
gene10073	3199.99	0.192407	0.244561	0.786747	0.43143	0.531708	2644.36	3065.5	4628.04	2969.77	2927.46	2497.14	3667.68	CLINT1	no
gene10076	3698.34	-1.69659	0.32084	-5.28797	1.24e-07	1.38e-06	1422.07	2497.82	944.009	3712.73	6696.05	6201.25	4414.44	EBF1	down
gene10078	3244	-0.101767	0.218824	-0.465062	0.641887	0.721338	2395.19	3503.14	3443.84	3093.77	2818.67	3648.37	3805	RNF145	no
gene1008	3150.3	-0.520975	0.197619	-2.63625	0.00838272	0.0194762	2486.1	2206.75	2877.44	3135.1	3725.85	3448.01	4172.87	MAN1A2	no
gene10081	2171.63	-0.975681	0.226514	-4.30737	1.65e-05	9.24e-05	1607.27	1292.26	1297.71	2111.08	2561.28	2806.56	3525.28	UBLCP1	no
gene10084	57.9759	-0.916448	0.40932	-2.23895	0.0251591	0.0494222	32.5494	60.8972	21.5091	88.8658	54.392	66.2458	81.3722	ADRA1B	no
gene10086	1530.87	-0.0573259	0.199782	-0.286943	0.774156	0.8304	1743.08	1197.3	1548.65	1477.65	1637.59	1547.08	1564.72	TTC1	no
gene10087	1364.79	-0.622473	0.21666	-2.87304	0.00406541	0.0105267	840.672	1293.29	995.392	1397.05	1567.66	1682.81	1776.63	PWWP2A	no
gene10089	71.2275	-0.348818	0.374085	-0.932456	0.351101	0.449388	46.0181	92.8941	45.408	75.4326	105.87	71.0931	61.8768	CCNJL	no
gene10090	204.99	0.885976	0.300572	2.94764	0.00320213	0.00859058	227.846	259.071	346.535	117.799	225.338	124.413	133.925	C1QTNF2	no
gene10092	348.816	-0.124327	0.234386	-0.530436	0.595809	0.681361	295.189	302.422	397.918	333.763	391.428	299.722	421.271	ZBED8	no
gene10093	2214.76	-0.727422	0.247581	-2.93812	0.00330212	0.00881386	1887.86	1276.78	1669.34	1923.01	2596.25	2641.75	3508.33	SLU7	no
gene10094	464.927	-0.761585	0.231001	-3.29688	0.000977638	0.00310275	377.124	302.422	319.051	423.662	566.26	610.754	655.216	PTTG1	no
gene10096	1044.75	-1.49676	0.248091	-6.03312	1.61e-09	3.43e-08	516.301	592.458	426.597	1315.42	1022.76	1791.06	1648.63	ATP10B	down
gene10097	43.8271	-0.462414	0.379052	-1.21992	0.222494	0.309649	32.5494	34.0612	41.8232	40.2996	40.794	63.0143	54.2481	GABRB2	no
gene1010	645.628	0.463937	0.238314	1.94674	0.0515656	0.0914987	801.388	549.107	947.594	607.594	603.169	496.036	514.51	FAM46C	no
gene10101	15.1218	-0.465086	0.837089	-0.555599	0.578485	0.666718	7.85675	1.03216	28.6788	9.29991	10.6841	34.7387	13.562	GABRA1	no
gene10102	4.63978	-2.70637	1.43397	-1.88733	0.0591162	0.102847	3.36718	0	0	1.03332	8.74157	3.2315	16.1049	GABRG2	no
gene10107	7885.46	-0.698091	0.267338	-2.61127	0.00902078	0.0207193	6201.22	4542.52	6707.25	6323.94	10953.2	7891.33	12578.8	CCNG1	no
gene10108	544.854	-0.059538	0.218057	-0.273039	0.784823	0.838623	589.256	447.956	559.236	475.329	636.192	502.499	603.511	NUDCD2	no
gene10109	678.137	-0.894137	0.254504	-3.51325	0.000442658	0.00157598	410.796	464.47	489.929	645.827	755.66	770.713	1209.56	HMMR	no
gene10110	2371.64	-0.11386	0.206963	-0.550143	0.582221	0.66976	2272.84	1858.91	2664.74	2274.34	2638.98	2152.99	2738.68	MAT2B	no
gene10115	127.881	-2.8288	0.395099	-7.15972	8.08e-13	5.36e-11	39.2837	36.1255	9.55959	266.597	198.142	197.122	148.335	LOC106990422	down
gene10116	11732.2	-1.04793	0.242808	-4.31588	1.59e-05	8.94e-05	7677.16	9242.96	4939.92	15172.3	13483.4	17888	13721.4	LOC101120408	down
gene10119	1551.25	0.239208	0.207657	1.15194	0.249346	0.340316	1860.93	1631.84	1606.01	1709.12	1205.37	1585.05	1260.42	WWC1	no
gene1012	1328.48	-0.562164	0.201201	-2.79404	0.00520544	0.0130117	931.586	1013.58	1187.78	1599.58	1267.53	1630.29	1668.98	GDAP2	no
gene10120	2951.89	-0.923468	0.217777	-4.24044	2.23e-05	0.000119622	2270.6	1671.06	1914.31	3132	3274.2	3785.71	4615.33	RARS	no
gene10124	2250.21	-0.858089	0.264671	-3.2421	0.00118652	0.00366238	1105.56	1583.33	1921.48	2175.14	2595.28	2516.53	3854.16	ZFYVE16	no
gene10125	36884.2	-0.893956	0.298179	-2.99805	0.0027171	0.00745241	34706.6	16375.2	23160.5	30024.2	46081.7	44400	63441.5	FAM151B	no
gene10127	2.26032	-0.941167	1.58835	-0.592543	0.553487	0.644335	2.24478	1.03216	1.19495	0	2.91386	0.807876	7.62864	ANKRD34B	no
gene10128	1074.09	-0.214056	0.23616	-0.906401	0.364724	0.463563	987.705	881.461	1083.82	870.058	1152.92	1020.35	1522.34	DHFR	no
gene10129	1053.39	-0.547895	0.198234	-2.76388	0.00571191	0.0140795	771.084	884.558	844.829	1040.56	1146.12	1265.94	1420.62	MSH3	no
gene1013	744.789	-0.443853	0.2909	-1.52579	0.127062	0.195045	401.816	709.091	742.063	1032.29	532.265	846.654	949.342	WDR3	no
gene10132	349.57	-0.461437	0.235075	-1.96293	0.0496539	0.0886214	232.335	361.255	268.863	402.996	405.998	431.406	344.137	RASGRF2	no
gene10134	65.3848	-1.85565	0.434399	-4.27177	1.94e-05	0.000106152	21.3255	40.2541	16.7293	87.8324	54.392	141.378	95.7819	CKMT2	down
gene10135	550.251	-0.478383	0.202174	-2.3662	0.0179719	0.0372466	497.22	414.927	436.156	555.928	593.456	646.301	707.769	ZCCHC9	no
gene10137	225.513	-0.733792	0.295377	-2.48426	0.0129822	0.0282467	162.747	218.817	108.74	274.864	196.2	306.993	310.232	ACOT12	no
gene10139	6013.84	-1.81838	0.267872	-6.78822	1.14e-11	4.9e-10	2839.65	2915.84	1626.33	6001.54	9298.12	8860.78	10554.7	SSBP2	down
gene1014	3002.88	-0.449212	0.337911	-1.32938	0.183722	0.264115	3756.65	1495.59	2201.1	2038.75	3605.41	2947.94	4974.72	SPAG17	no
gene10140	9.13519	-2.2471	0.871994	-2.57697	0.00996708	0.0225535	4.48957	4.12862	0	9.29991	15.5406	17.7733	12.7144	LOC105606746	no
gene10141	936.459	-1.28672	0.233012	-5.52213	3.35e-08	4.48e-07	514.056	602.779	424.207	929.991	1375.34	1261.09	1447.75	ATG10	down
gene10146	1653.1	-1.16594	0.400505	-2.91117	0.00360079	0.00947723	1697.06	438.666	763.572	1076.72	2216.47	2443.02	2936.18	RPS23	down
gene10147	27.4238	-1.1941	0.479581	-2.48987	0.0127789	0.0278723	13.4687	20.6431	13.1444	29.9664	45.6504	42.8174	26.2764	ATP6AP1L	no
gene10149	7121.95	-0.191459	0.215979	-0.88647	0.375364	0.474442	8082.35	4934.74	6746.68	6650.47	7585.74	7999.59	7854.11	TMEM167A	no
gene10151	961.216	-1.44679	0.28641	-5.05144	4.38e-07	4.04e-06	460.181	617.229	374.019	814.258	1621.08	1195.66	1646.09	XRCC4	down
gene10153	3629.25	0.188271	0.264292	0.712362	0.476241	0.574592	2447.94	5521	3736.6	3762.33	3561.71	3252.51	3122.66	VCAN	no
gene10155	198.012	-0.708289	0.317485	-2.23094	0.0256853	0.0503286	166.114	105.28	164.903	192.198	310.811	153.496	293.279	HAPLN1	no
gene10156	2657.14	-0.424287	0.277515	-1.52888	0.126294	0.194002	2041.63	1894.01	2732.85	2767.24	4502.88	2079.47	2581.87	EDIL3	no
gene10165	4596.78	-0.79679	0.212045	-3.75764	0.000171521	0.000699	2978.83	3453.59	3270.57	4312.06	5863.65	5380.45	6918.33	RASA1	no
gene10166	1403.58	-0.847144	0.217943	-3.887	0.00010149	0.000444653	927.096	879.397	1085.01	1541.72	1504.52	1651.3	2236.04	CCNH	no
gene1017	1697.23	-0.68453	0.237909	-2.87727	0.00401129	0.0103929	1037.09	1552.36	1190.17	1853.78	2615.67	2009.99	1621.51	TBX15	no
gene10172	1232.39	-1.2916	0.261611	-4.93709	7.93e-07	6.76e-06	611.704	934.101	476.784	1448.72	1396.71	1837.11	1921.57	TMEM161B	down
gene10175	2404.79	-0.892425	0.257028	-3.47209	0.000516425	0.00180075	1372.69	1886.78	1584.5	2011.88	4108.54	2976.21	2892.95	MEF2C	no
gene1018	772.256	-0.310499	0.192464	-1.61329	0.106682	0.168711	650.988	649.226	737.283	772.926	883.87	772.329	939.171	WARS2	no
gene10180	3.80862	-0.935519	1.21884	-0.767546	0.442757	0.542929	2.24478	5.16078	0	8.26658	1.94257	5.65513	3.39051	LOC106991203	no
gene10183	1906.5	-0.90407	0.244222	-3.70183	0.000214049	0.000842402	1444.52	1213.82	1160.3	1725.65	2240.76	2290.33	3270.15	CETN3	no
gene10185	1341.15	-1.29884	0.263872	-4.92225	8.56e-07	7.22e-06	734.045	786.503	672.756	1688.45	1184	1734.51	2587.81	POLR3G	down
gene10186	1095.15	-0.59261	0.257668	-2.2999	0.021454	0.0433185	663.334	785.471	1098.16	1007.49	1167.49	1234.43	1709.66	LYSMD3	no
gene10187	668.328	-1.01241	0.330326	-3.0649	0.00217744	0.00618613	544.36	341.644	382.384	584.861	601.226	1454.18	769.645	ADGRV1	down
gene10189	5632.46	-0.483319	0.239068	-2.02168	0.0432089	0.0787459	3776.85	3950.06	6040.47	5156.28	7201.11	5861.95	7440.47	ARRDC3	no
gene10194	221.657	0.568503	0.276108	2.05899	0.0394955	0.0728558	259.273	276.618	280.813	164.298	266.132	168.846	135.62	NR2F1	no
gene10195	7820.96	-1.28931	0.312078	-4.13137	3.61e-05	0.000181203	5693.9	3522.75	3638.62	6047.01	8690.09	11149.5	16004.9	FAM172A	down
gene10197	1331.35	-1.54524	0.269961	-5.72395	1.04e-08	1.64e-07	741.901	740.056	423.012	1329.89	1787.17	1947.79	2349.62	KIAA0825	down
gene1020	10.843	-0.122391	0.6776	-0.180624	0.856663	0.894895	13.4687	10.3216	7.16969	13.4332	5.82772	12.1181	13.562	HSD3B1	no
gene10200	830.112	-0.835765	0.226642	-3.68761	0.000226374	0.000884192	617.316	572.847	529.362	748.126	1069.39	1025.19	1248.55	SLF1	no
gene10201	1315.82	-1.4088	0.264195	-5.33244	9.69e-08	1.12e-06	763.227	844.304	420.622	1475.59	1814.36	1749.86	2142.8	MCTP1	down
gene10207	3.88483	-0.515932	1.24984	-0.412798	0.679755	0.753912	2.24478	0	7.16969	3.09997	9.71286	2.42363	2.54288	FAM81B	no
gene10208	1642.11	-0.589823	0.25948	-2.2731	0.0230202	0.0459062	815.979	1274.71	1732.68	1887.88	1775.51	1782.17	2225.87	TTC37	no
gene10209	167.916	-0.211644	0.286361	-0.73908	0.459858	0.559049	136.932	166.177	158.928	142.599	230.195	210.048	130.535	ARSK	no
gene1021	34.7479	0.631021	0.509013	1.23969	0.215088	0.301032	17.9583	59.8651	52.5777	37.1996	36.9089	22.6205	16.1049	ZNF697	no
gene10211	3.17262	-0.76265	1.18939	-0.641209	0.521387	0.615769	2.24478	1.03216	3.58485	3.09997	4.85643	4.84725	2.54288	GPR150	no
gene10213	191.889	-0.600408	0.287096	-2.09132	0.0364998	0.0679972	202.031	119.73	123.08	166.365	231.166	243.171	257.679	RFESD	no
gene10214	594.011	-1.57582	0.293493	-5.3692	7.91e-08	9.4e-07	233.458	420.088	181.632	642.727	844.047	909.668	926.456	SPATA9	down
gene10215	3204.55	-0.468225	0.217594	-2.15183	0.0314107	0.0599067	1917.05	2992.22	2976.62	3911.13	3246.04	3771.97	3616.83	RHOBTB3	no
gene10216	778.851	-0.566232	0.652408	-0.867911	0.385443	0.485031	1010.15	213.656	609.424	467.062	1150.97	597.02	1403.67	GLRX	no
gene10217	2389.25	-0.895486	0.22084	-4.05491	5.02e-05	0.000241105	1313.2	1576.1	1916.7	2991.47	2558.37	3671.8	2697.15	ELL2	no
gene10219	28.3115	-1.86139	0.534106	-3.48505	0.000492049	0.00172489	13.4687	6.19294	14.3394	60.9661	40.794	23.4284	38.9908	LOC105607634	down
gene1022	2202.02	0.682624	0.273826	2.49291	0.0126701	0.0276598	3220.14	2324.42	2875.05	1568.58	2267.95	1055.89	2102.12	PHGDH	no
gene10222	14.796	-0.557956	0.704889	-0.791552	0.428622	0.528743	4.48957	19.611	10.7545	23.7664	5.82772	14.5418	24.5812	PCSK1	no
gene10224	7223.14	0.431909	0.192263	2.24645	0.0246751	0.0486279	8576.2	7311.79	9541.66	5776.28	5663.57	6633.47	7059.04	CAST	no
gene10225	1175.64	0.140536	0.210505	0.667612	0.504382	0.600037	1402.99	1136.4	1185.39	883.491	1295.7	1127.79	1197.7	ERAP1	no
gene10226	251.381	-0.00369487	0.315545	-0.0117095	0.990657	0.993796	140.299	274.554	338.17	319.297	195.228	231.052	261.069	ERAP2	no
gene10227	4999.29	-0.24292	0.203537	-1.19349	0.232676	0.321361	3883.48	4326.8	5365.32	5997.41	4485.4	5605.04	5331.57	LNPEP	no
gene10229	4.22983	0.273733	1.08663	0.251911	0.80111	0.851648	1.12239	9.28941	3.58485	6.19994	1.94257	3.2315	4.23814	LOC101110759	no
gene1023	27.3215	-0.153597	0.493814	-0.311042	0.755768	0.815805	37.039	18.5788	21.5091	26.8664	21.3683	21.8126	44.0766	HMGCS2	no
gene10230	222.324	-0.330175	0.297722	-1.10901	0.267427	0.360903	249.171	135.212	197.167	229.398	322.467	174.501	248.355	LIX1	no
gene10231	1248.91	-0.99534	0.20091	-4.95415	7.26e-07	6.25e-06	859.753	790.632	739.673	1507.62	1319.01	1680.38	1845.28	RIOK2	no
gene10234	933.35	-1.67907	0.292326	-5.74382	9.26e-09	1.49e-07	410.796	559.429	268.863	1813.48	962.544	1325.72	1192.61	RGMB	down
gene10235	4675.88	0.0103223	0.173909	0.0593548	0.952669	0.967148	4987.91	4304.09	4792.94	5145.95	4469.86	4483.71	4546.67	RGMB	no
gene10236	4251.77	-0.8832	0.204887	-4.31068	1.63e-05	9.12e-05	2933.93	2864.23	2805.74	4035.13	5584.89	5260.08	6278.37	CHD1	no
gene10242	234.473	-0.53417	0.24882	-2.14681	0.0318082	0.0605163	211.01	171.338	178.047	227.331	234.08	277.909	341.594	FAM174A	no
gene10244	966.729	-1.04846	0.244024	-4.29654	1.73e-05	9.62e-05	464.67	563.557	773.132	1022.99	1292.78	1131.03	1518.95	ST8SIA4	down
gene10247	85.1425	-1.16389	0.40328	-2.88606	0.00390092	0.0101515	29.1822	63.9937	56.1626	160.165	57.3059	113.91	115.277	SLCO4C1	no
gene10248	2.1354	-1.37486	1.66668	-0.824908	0.409424	0.509545	3.36718	0	0	3.09997	0.971286	2.42363	5.08576	SLCO6A1	no
gene10251	2864.16	0.300576	0.231917	1.29605	0.194958	0.277168	2443.45	3062.41	4121.38	2388.01	3138.22	2330.72	2564.92	PAM	no
gene10254	345.671	-0.847943	0.213842	-3.96528	7.33e-05	0.000334911	223.356	260.103	228.235	382.329	405.026	428.174	492.471	GIN1	no
gene10255	3327.82	-0.933156	0.190258	-4.90468	9.36e-07	7.79e-06	1899.09	2490.59	2179.59	3804.69	4162.93	4062.81	4695.01	PPIP5K2	no
gene10256	445.99	-0.532118	0.225526	-2.35945	0.0183018	0.0378136	329.983	338.547	397.918	452.595	558.489	428.174	616.225	C5H5orf30	no
gene10258	834.817	-0.781102	0.278645	-2.80322	0.00505958	0.0127021	529.769	476.856	769.547	769.826	962.544	862.003	1473.18	NUDT12	no
gene10266	11544.2	-2.27029	0.30927	-7.34079	2.12e-13	1.7e-11	3939.6	5057.57	1874.87	18913.9	15925.2	22004.9	13093.3	EFNA5	down
gene10267	5865.4	-0.894918	0.204249	-4.38151	1.18e-05	6.89e-05	3761.14	4091.47	3948.11	5503.48	7785.83	7576.26	8391.51	FBXL17	no
gene10268	4091.52	-1.26867	0.183505	-6.91352	4.73e-12	2.34e-10	2084.28	2612.39	2101.91	5118.05	5224.55	5776.31	5723.18	FER	down
gene10269	5117.33	-0.155864	0.192018	-0.811718	0.416954	0.517035	4161.83	4594.13	5656.89	5051.92	5333.33	5067.8	5955.43	PJA2	no
gene10271	2917.61	-0.328933	0.205514	-1.60054	0.109479	0.172385	1957.45	2821.92	2855.93	3484.36	3125.6	2952.79	3225.22	MAN2A1	no
gene10273	171.932	-1.5491	0.321627	-4.81646	1.46e-06	1.14e-05	83.057	66.058	96.7908	269.697	141.808	322.342	223.774	TMEM232	down
gene10275	1061.3	-0.267939	0.263438	-1.01709	0.309113	0.405977	618.438	1071.38	1161.49	1404.29	896.497	1114.06	1162.94	SLC25A46	no
gene10277	1365.49	-0.71349	0.239259	-2.98209	0.00286292	0.00779554	716.086	1181.82	1101.74	1912.68	1305.41	1683.61	1657.11	WDR36	no
gene10278	10.6254	-1.29576	0.735554	-1.7616	0.0781361	0.12986	5.61196	9.28941	2.3899	14.4665	8.74157	17.7733	16.1049	LOC106991207	no
gene1028	5985.03	-0.0149803	0.204654	-0.0731982	0.941648	0.958222	4555.79	6953.64	6339.2	5847.57	5739.33	6503.4	5956.28	NOTCH2	no
gene10280	209.513	-0.492586	0.345784	-1.42455	0.154287	0.228663	153.768	123.859	233.015	196.331	134.037	309.416	316.165	CAMK4	no
gene10281	2665.77	-0.298268	0.224441	-1.32894	0.183868	0.264236	1922.66	2085.99	3061.46	2815.8	2662.29	2723.35	3388.81	STARD4	no
gene10285	14.97	-0.985898	0.668575	-1.47463	0.140313	0.211488	16.8359	7.22509	4.77979	8.26658	21.3683	23.4284	22.8859	APELA	no
gene10291	212.066	-1.10565	0.319662	-3.45883	0.000542528	0.0018776	68.4659	129.02	186.412	247.998	329.266	252.057	271.241	2021-03-01	down
gene10292	1259.9	-0.330738	0.265147	-1.24738	0.21226	0.297707	1596.04	896.944	801.81	1205.89	1289.87	1426.71	1602.02	TMA16	no
gene10294	66.199	-0.621472	0.429572	-1.44672	0.147975	0.22107	35.9166	43.3506	72.8919	37.1996	106.841	64.6301	102.563	NPY5R	no
gene10296	153.817	-0.96877	0.368766	-2.62706	0.00861268	0.01994	51.6301	92.8941	154.148	128.132	233.109	176.925	239.878	NPY1R	no
gene10297	966.491	-0.626534	0.207214	-3.0236	0.00249784	0.00693956	702.618	841.207	667.976	1217.25	914.951	1227.97	1193.46	NAF1	no
gene10298	275.588	-0.497469	0.243874	-2.03986	0.0413641	0.0758202	190.807	245.653	233.015	240.764	333.151	310.224	375.499	BBS7	no
gene10299	609.066	0.105212	0.210541	0.499722	0.617271	0.700095	595.99	702.898	604.644	661.327	473.016	587.326	638.263	CCNA2	no
gene1030	2205.51	-0.474718	0.208783	-2.27374	0.0229814	0.0458411	1795.83	1581.26	2035	2227.84	2577.79	2164.3	3056.54	SEC22B	no
gene10300	1098.87	-0.844082	0.211852	-3.9843	6.77e-05	0.000312624	860.875	784.439	621.373	1203.82	1223.82	1418.63	1579.13	EXOSC9	no
gene10303	5.10737	-0.605696	1.31357	-0.461107	0.644722	0.723646	4.48957	7.22509	0	12.3999	1.94257	9.69451	0	TMEM155	no
gene10304	1683.3	0.789764	0.270731	2.91716	0.00353238	0.00932733	1669	2082.89	2900.14	1401.19	1642.44	866.043	1221.43	ANXA5	no
gene10307	76.2767	-0.828209	0.383746	-2.15822	0.0309105	0.0591307	41.5285	62.9615	53.7727	89.8991	151.521	62.2064	72.0483	QRFPR	no
gene10308	76.3063	0.562879	0.326605	1.72342	0.0848122	0.139357	120.096	63.9937	96.7908	57.8661	73.8177	61.3986	60.1815	TNIP3	no
gene10309	147.61	0.30885	0.321372	0.961038	0.336533	0.434122	103.26	228.107	166.098	104.366	165.119	117.142	149.182	NDNF	no
gene1031	775.246	0.365305	0.230854	1.58241	0.113556	0.177594	657.722	915.523	1093.38	674.76	750.804	595.404	739.131	LOC101112864	no
gene10310	991.81	-1.37117	0.308006	-4.45176	8.52e-06	5.21e-05	475.894	794.76	289.178	1060.19	1338.43	1607.67	1376.55	PRDM5	down
gene10312	698.062	-0.525596	0.225642	-2.32934	0.0198411	0.0405405	657.722	440.731	575.965	684.06	759.546	821.61	946.8	MAD2L1	no
gene10313	551.808	-0.876813	0.241155	-3.63589	0.000277021	0.00105385	319.882	411.83	388.358	542.495	879.985	733.551	586.558	PDE5A	no
gene10315	2650.23	-0.591861	0.258231	-2.29199	0.0219065	0.0440447	2376.1	1609.13	2179.59	2404.54	2604.02	2970.56	4407.66	C6H4orf3	no
gene10317	1378.06	-1.13122	0.194611	-5.81273	6.15e-09	1.06e-07	662.212	903.137	895.016	1796.95	1831.85	1796.72	1760.52	USP53	down
gene10319	168.42	-1.73846	0.365182	-4.76053	1.93e-06	1.44e-05	101.015	80.5082	34.6535	177.732	185.516	322.342	277.174	MYOZ2	down
gene10320	3287.71	-0.0713171	0.223426	-0.319198	0.749576	0.810942	2829.55	2931.32	3825.03	2676.31	4227.04	3331.68	3193.01	SYNPO2	no
gene10323	1681.79	-0.195134	0.246564	-0.791412	0.428704	0.528774	1022.5	1775.31	1861.73	1801.08	2075.64	1635.95	1600.32	SEC24D	no
gene10324	1404.92	-0.822654	0.209716	-3.9227	8.76e-05	0.00039135	989.95	926.876	1012.12	1487.99	1512.29	1719.16	2186.03	METTL14	no
gene10326	506.35	-1.14278	0.279103	-4.09448	4.23e-05	0.000208328	281.721	410.798	205.531	751.226	490.499	634.182	770.493	PRSS12	down
gene10329	332.39	-1.60282	0.282422	-5.67528	1.38e-08	2.11e-07	125.708	197.142	137.419	393.696	662.417	395.859	414.49	NDST3	down
gene10332	6.54945	-0.688878	0.952793	-0.723009	0.469674	0.568235	1.12239	6.19294	7.16969	10.3332	13.598	4.03938	3.39051	TRAM1L1	no
gene10334	153.96	0.905158	0.283668	3.19091	0.00141828	0.00427734	225.601	167.209	236.6	117.799	122.382	76.7482	131.382	LOC101112318	no
gene10341	21.8798	-2.74965	0.678659	-4.0516	5.09e-05	0.000244068	2.24478	8.25725	4.77979	13.4332	37.8802	32.315	54.2481	NDST4	down
gene10342	55.4269	-1.54464	0.352448	-4.38261	1.17e-05	6.86e-05	22.4478	24.7717	32.2636	72.3326	87.4157	77.5561	71.2007	UGT8	down
gene10347	623.738	-1.24203	0.272362	-4.56022	5.11e-06	3.36e-05	251.416	368.48	431.376	667.527	1033.45	636.606	977.314	ARSJ	down
gene10348	4222.9	-0.886095	0.198759	-4.45813	8.27e-06	5.08e-05	3183.1	2864.23	2485.49	4533.19	6156.01	4879.57	5458.72	CAMK2D	no
gene10351	2436.49	-1.33685	0.313627	-4.26253	2.02e-05	0.000109934	1114.54	1807.31	982.248	2301.21	5251.74	2983.49	2614.93	ANK2	down
gene10354	2996.82	-0.937931	0.335908	-2.79223	0.00523461	0.0130751	2918.22	1491.47	1492.49	2017.05	4359.13	3303.4	5395.99	LARP7	no
gene10356	297.129	-0.694648	0.244614	-2.83977	0.00451465	0.0115156	194.174	286.939	176.852	378.196	346.749	322.342	374.651	ZGRF1	no
gene10358	537.528	-0.636117	0.237997	-2.6728	0.00752218	0.0177984	370.39	456.213	397.918	523.895	843.076	624.488	546.72	ALPK1	no
gene1036	3.99504	-0.386968	1.11225	-0.347914	0.727905	0.793167	2.24478	2.06431	5.97474	1.03332	5.82772	4.03938	6.78102	LOC101112943	no
gene10361	198.988	-0.413263	0.248389	-1.66378	0.0961572	0.154567	142.544	200.238	158.928	184.965	244.764	216.511	244.964	TIFA	no
gene10362	2396.89	-0.67038	0.20048	-3.34387	0.000826194	0.00269206	1727.36	1656.61	1990.78	2419.01	2866.26	2686.99	3431.19	AP1AR	no
gene10363	646.085	-0.420339	0.24092	-1.74472	0.0810337	0.133959	514.056	451.052	659.612	624.127	827.536	582.478	863.732	C6H4orf32	no
gene10367	32.3274	-0.0163729	0.416349	-0.0393249	0.968631	0.978358	28.0598	29.9325	38.2384	40.2996	35.9376	25.852	27.9717	PITX2	no
gene10368	99.3211	-1.1691	0.320473	-3.64806	0.000264223	0.00101124	48.2629	77.4117	47.7979	127.099	141.808	97.753	155.116	ENPEP	down
gene10371	4418.78	-0.564683	0.198485	-2.84496	0.00444167	0.0113616	3281.88	3003.57	4122.57	4807.02	4870.03	4924	5922.37	ELOVL6	no
gene10373	4.38417	-3.27208	1.45848	-2.24349	0.0248654	0.0489127	0	1.03216	1.19495	1.03332	5.82772	8.88663	12.7144	EGF	no
gene10374	2.91081	-0.944335	1.33149	-0.709234	0.478179	0.575957	3.36718	0	2.3899	5.16661	1.94257	2.42363	5.08576	LRIT3	no
gene10375	91.0288	-1.63172	0.375364	-4.34702	1.38e-05	7.92e-05	42.6509	61.9294	19.1192	122.965	102.956	150.265	137.316	RRH	down
gene10376	623.848	0.332598	0.220615	1.50759	0.131659	0.200728	855.263	649.226	616.593	532.161	576.944	480.686	656.063	GAR1	no
gene10377	86.9905	-1.05417	0.516197	-2.04219	0.0411325	0.0754442	65.0988	40.2541	56.1626	71.2993	262.247	63.0143	50.8576	CFI	no
gene10378	1791.31	-0.118074	0.199177	-0.592811	0.553308	0.644257	1551.15	1541.01	2032.61	1887.88	1618.16	1879.12	2029.22	PLA2G12A	no
gene10379	1641.67	-0.604362	0.281464	-2.14721	0.0317768	0.06047	1588.19	777.214	1431.55	1504.52	1896.92	1738.55	2554.75	CASP6	no
gene1038	589.937	-0.206412	0.199287	-1.03575	0.300317	0.396475	525.28	569.75	531.752	679.926	538.092	693.965	590.796	PRKAB2	no
gene10382	2012.91	-0.695564	0.200942	-3.46151	0.000537151	0.00186163	1636.45	1534.82	1288.15	2632.91	2535.06	2510.07	1952.93	CCDC109B	no
gene10383	2198.86	-0.340847	0.205197	-1.66107	0.096699	0.155278	1542.17	2095.28	2087.58	2219.58	2219.39	2413.93	2814.12	SEC24B	no
gene10385	335.051	-1.73647	0.313456	-5.53975	3.03e-08	4.12e-07	218.867	109.409	102.766	452.595	340.921	580.863	539.938	COL25A1	down
gene10388	262.521	-0.354931	0.28274	-1.25532	0.209361	0.294075	267.129	227.074	185.217	307.93	185.516	374.046	290.736	ETNPPL	no
gene10389	2757.28	-0.826754	0.241522	-3.4231	0.000619123	0.00210143	2201.01	1685.51	1849.78	2414.88	3686.03	3057.81	4405.97	OSTC	no
gene1039	1410.24	-0.614287	0.228662	-2.68644	0.00722182	0.0172295	924.851	938.23	1383.75	1476.62	1537.55	1589.09	2021.59	FMO5	no
gene10390	451.148	-1.3905	0.2861	-4.8602	1.17e-06	9.44e-06	274.986	293.132	133.834	626.194	505.069	723.857	600.968	RPL34	down
gene10391	4661.9	-0.900494	0.258734	-3.48038	0.0005007	0.00175235	3131.47	3569.2	2652.79	4842.15	4392.15	8537.63	5507.88	LEF1	no
gene10392	5662.11	0.748458	0.285013	2.62605	0.00863832	0.0199858	9629	4263.84	8204.52	3942.13	5480	3426.2	4689.07	HADH	no
gene10393	2354.35	-0.315088	0.245377	-1.28409	0.199109	0.282061	1373.81	2701.15	2123.42	2347.71	2407.82	2842.11	2684.44	LOC101120834	no
gene10395	985.558	-0.400523	0.189984	-2.1082	0.0350139	0.0656871	760.982	822.629	916.526	982.69	1057.73	1183.54	1174.81	SGMS2	no
gene10397	2279.2	0.3784	0.219161	1.72659	0.0842419	0.138513	2194.28	2872.49	2809.32	1626.45	2250.47	1797.52	2403.87	PAPSS1	no
gene1040	1170.29	-0.974664	0.228133	-4.27234	1.93e-05	0.000105947	812.612	891.783	558.041	1439.42	1297.64	1749.05	1443.51	CHD1L	no
gene10400	1795.9	-1.02437	0.193478	-5.29452	1.19e-07	1.34e-06	979.849	1111.63	1295.32	2215.44	2560.31	2320.22	2088.55	DKK2	down
gene10401	131.803	-1.19011	0.368	-3.23399	0.00122075	0.00376122	115.606	74.3152	38.2384	119.865	173.86	176.117	224.621	GIMD1	down
gene10402	1191.8	-1.0354	0.27607	-3.75049	0.000176488	0.00071617	912.505	652.323	670.366	966.157	1563.77	1437.21	2140.26	AIMP1	down
gene10403	1147.04	-1.03044	0.215151	-4.78938	1.67e-06	1.28e-05	608.337	838.111	709.799	1222.42	1511.32	1401.66	1737.64	TBCK	down
gene10405	911.775	-0.266085	0.25508	-1.04314	0.296883	0.392933	676.803	838.111	936.84	700.593	1333.58	1009.04	887.466	NPNT	no
gene10407	418674	3.08847	0.206092	14.9859	9.08e-51	5.18e-47	674836	857190	1.00155e+06	110419	101614	100130	84983.9	GSTCD	up
gene10408	740.584	-0.770946	0.211983	-3.63684	0.000276005	0.00105022	496.097	524.335	562.821	693.36	949.918	939.559	1018	INTS12	no
gene10409	98.5655	-1.46395	0.378622	-3.86652	0.000110399	0.000478294	33.6718	68.1223	45.408	91.9657	204.941	102.6	143.249	ARHGEF38	down
gene10410	1469.63	-0.547621	0.218031	-2.51167	0.0120161	0.0264618	1363.71	1172.53	952.374	1336.09	1813.39	1786.21	1863.08	PPA2	no
gene10412	3623.53	-0.731486	0.196817	-3.71659	0.000201931	0.000800237	2280.7	2822.95	2789.01	4315.16	3736.54	5119.51	4300.86	TET2	no
gene10413	45983.3	-1.06632	0.355822	-2.99678	0.00272846	0.00747224	43079.7	17705.6	24097.3	33185.2	57640	49395.9	96779.5	LOC105612165	down
gene10414	84.8265	-0.48953	0.34314	-1.42662	0.15369	0.227856	75.2003	59.8651	71.6969	71.2993	146.664	78.3639	90.6961	CXXC4	no
gene10415	257.218	0.609623	0.23223	2.62508	0.00866279	0.020037	364.778	282.811	313.077	205.631	252.534	184.196	197.497	TACR3	no
gene10418	1860.06	-1.05567	0.288311	-3.66158	0.000250666	0.000967147	1289.63	1098.21	1064.7	1429.09	2219.39	2248.32	3671.07	CENPE	down
gene10419	952.437	-1.13311	0.195669	-5.79095	7e-09	1.17e-07	648.743	563.557	486.344	1277.19	1212.16	1331.38	1147.69	BDH2	down
gene10420	203.372	-0.430865	0.2522	-1.70843	0.0875567	0.143056	126.83	183.724	198.361	232.498	239.908	244.786	197.497	SLC9B2	no
gene10422	255.9	-1.59841	0.300642	-5.31664	1.06e-07	1.21e-06	158.257	130.052	66.9171	311.03	400.17	410.401	314.47	SLC9B1	down
gene10423	1807.93	-0.503433	0.23826	-2.11296	0.0346042	0.0650326	1465.84	1346.96	1566.58	1697.75	1834.76	1820.14	2923.47	CISD2	no
gene10425	5807.95	-0.677494	0.208381	-3.25123	0.00114907	0.00356415	4688.23	4096.63	4194.27	5712.21	6469.74	6668.21	8826.34	UBE2D3	no
gene10426	367.815	-0.895751	0.228967	-3.91213	9.15e-05	0.000406548	186.317	272.489	280.813	467.062	490.499	460.489	417.033	MANBA	no
gene10427	2184.85	-0.245194	0.179615	-1.36511	0.172218	0.250269	1827.25	2112.82	1987.2	2158.61	2303.89	2623.17	2280.96	NFKB1	no
gene10430	7172.63	-0.46989	0.21909	-2.14474	0.0319737	0.0607905	6286.52	4896.55	6455.11	8193.22	6290.05	8073.1	10013.9	SLC39A8	no
gene10432	214.689	-1.12948	0.274548	-4.11395	3.89e-05	0.000193621	95.4034	141.405	146.979	222.164	296.242	248.018	352.613	BANK1	down
gene10435	4169.66	-0.219972	0.210919	-1.04292	0.296985	0.393038	4085.51	3157.37	4190.68	3611.46	4691.31	4215.5	5235.79	PPP3CA	no
gene10438	708.431	-0.874109	0.222379	-3.93071	8.47e-05	0.000379925	416.408	478.92	544.897	702.66	1067.44	895.126	853.561	EMCN	no
gene10440	102.605	0.102192	0.322084	0.317283	0.751029	0.812103	106.627	82.5725	131.444	69.2326	129.181	86.4427	112.734	DDIT4L	no
gene10443	5797.6	-0.880474	0.252212	-3.491	0.000481212	0.0016928	4978.93	3154.27	3614.72	5115.98	7047.65	7379.94	9291.69	H2AFZ	no
gene10444	1592.5	-0.903199	0.279746	-3.22864	0.00124382	0.00381717	845.162	1073.44	1272.62	1365.02	1908.58	1715.12	2967.54	DNAJB14	no
gene10445	2210.49	-0.929075	0.237171	-3.91733	8.95e-05	0.000399027	1717.26	1238.59	1417.21	2102.81	2670.06	2670.84	3656.66	LAMTOR3	no
gene10446	651.428	-1.01531	0.234019	-4.33858	1.43e-05	8.18e-05	410.796	305.518	518.608	746.059	778.971	919.363	880.685	DAPP1	down
gene10447	23.1796	-0.658873	0.567934	-1.16012	0.245999	0.336499	8.97914	20.6431	22.704	33.0663	10.6841	33.1229	33.0575	LOC105612764	no
gene10448	4.17869	-1.16675	1.31191	-0.88935	0.373815	0.472833	0	7.22509	0	2.06665	5.82772	5.65513	8.47627	MTTP	no
gene10449	269.357	-0.889775	0.307653	-2.89214	0.00382629	0.00999015	124.586	239.46	179.242	249.031	276.816	342.539	473.824	TRMT10A	no
gene1045	488.885	0.599535	0.234655	2.55496	0.01062	0.0238167	521.912	586.265	712.189	400.929	456.504	444.332	300.06	BCL9	no
gene10451	259.666	-1.94338	0.339073	-5.73146	9.96e-09	1.59e-07	94.281	144.502	57.3575	331.697	261.276	525.927	402.623	C6H4orf17	down
gene10453	147.802	0.356997	0.286576	1.24573	0.212863	0.298407	143.666	167.209	195.972	115.732	178.717	133.299	100.02	ADH1C	no
gene10454	1540.35	-0.530184	0.345162	-1.53604	0.124528	0.191774	1260.45	1463.6	961.934	1166.62	918.836	2759.7	2251.3	LOC101122865	no
gene10455	2778.92	-0.630872	0.201631	-3.12885	0.00175492	0.00515	2277.33	1753.63	2317.01	2729.01	3582.1	3349.45	3443.91	LOC101112223	no
gene10456	1181.15	0.186521	0.200534	0.930121	0.352308	0.450596	1124.64	1242.72	1439.91	1250.32	1012.08	989.648	1208.72	METAP1	no
gene10458	3.30213	-2.80769	1.51464	-1.8537	0.0637815	0.109739	2.24478	0	0	6.19994	4.85643	7.27088	2.54288	LOC101112481	no
gene10459	4880.21	-0.753188	0.237835	-3.16685	0.00154101	0.00460123	3321.16	3306	3893.14	4543.52	5530.5	5305.32	8261.82	EIF4E	no
gene1046	1011.36	0.302249	0.211279	1.43057	0.152553	0.226584	1394.01	1085.83	921.305	934.124	990.712	917.747	835.76	ACP6	no
gene10464	1636.2	-1.15696	0.233509	-4.95465	7.25e-07	6.23e-06	920.362	1261.29	700.24	2337.38	1913.43	2197.42	2123.31	TSPAN5	down
gene10466	2330.68	-1.11636	0.196852	-5.67105	1.42e-08	2.16e-07	1326.67	1585.39	1280.98	2593.64	3200.39	2873.61	3454.08	RAP1GDS1	down
gene10467	3.48427	-3.86718	1.60421	-2.41065	0.015924	0.0335635	1.12239	0	0	7.23326	1.94257	6.46301	7.62864	LOC101102064	no
gene10468	3.26117	-2.12641	1.43123	-1.48573	0.137352	0.207849	3.36718	0	0	3.09997	3.88514	4.84725	7.62864	LOC106990267	no
gene10471	197.435	-2.13355	0.370787	-5.75411	8.71e-09	1.41e-07	70.7107	88.7654	41.8232	197.365	495.356	262.56	225.469	UNC5C	down
gene10476	807.552	-1.55961	0.244661	-6.37457	1.83e-10	5.35e-09	358.043	426.281	362.069	791.525	1468.58	1099.52	1146.84	BMPR1B	down
gene10478	5480.92	-0.910249	0.211775	-4.29818	1.72e-05	9.55e-05	3052.91	3965.54	3925.41	6086.27	5930.67	6908.15	8497.46	PDLIM5	no
gene10479	98.0943	-0.850322	0.386188	-2.20183	0.0276772	0.0536964	37.039	69.1545	95.5959	96.099	185.516	89.6742	113.582	HPGDS	no
gene10481	1600.23	-0.783392	0.217686	-3.59873	0.000319774	0.00119209	958.523	1165.3	1276.21	1594.42	1981.42	1819.34	2406.41	SMARCAD1	no
gene10484	5.34109	0.45238	0.932822	0.484958	0.627706	0.709109	4.48957	7.22509	7.16969	3.09997	8.74157	2.42363	4.23814	LOC101102814	no
gene10485	3.47937	1.07151	1.42859	0.750048	0.453226	0.552872	0	11.3537	3.58485	2.06665	0	5.65513	1.69525	ATOH1	no
gene10486	173.148	-1.45724	0.321697	-4.52985	5.9e-06	3.79e-05	95.4034	70.1866	94.4009	324.463	255.448	137.339	234.793	GRID2	down
gene10489	1522.48	-2.24285	0.303874	-7.38088	1.57e-13	1.3e-11	593.746	586.265	277.228	1455.95	2551.57	2463.21	2729.36	CCSER1	down
gene1049	290.347	1.42659	0.253279	5.63249	1.78e-08	2.63e-07	459.059	468.599	430.181	174.632	227.281	142.994	129.687	GJA5	up
gene10494	233.248	-0.13585	0.297205	-0.457092	0.647605	0.726162	173.971	172.37	316.661	219.064	227.281	319.111	204.278	MMRN1	no
gene10495	151.937	-1.08362	0.318353	-3.40382	0.000664511	0.00223596	96.5257	100.119	81.2565	122.965	275.845	165.615	221.231	SNCA	down
gene10496	91.8762	-0.779841	0.360452	-2.16351	0.0305022	0.0584608	49.3853	63.9937	82.4515	65.0993	125.296	101.792	155.116	GPRIN3	no
gene10497	221.019	0.315455	0.255446	1.23492	0.21686	0.303016	260.395	226.042	260.499	183.931	217.568	148.649	250.05	TIGD2	no
gene10498	2209.74	-0.990861	0.254206	-3.89787	9.7e-05	0.000427796	1262.69	1866.14	1108.91	2000.51	2937.17	3307.44	2985.34	FAM13A	no
gene10499	2387.64	-0.768368	0.234145	-3.28158	0.00103226	0.00324957	1278.4	1864.07	1966.89	3502.96	2327.2	3120.02	2653.92	HERC3	no
gene10503	1132.35	-1.35397	0.233399	-5.8011	6.59e-09	1.12e-07	585.889	750.378	461.25	1250.32	1791.05	1574.55	1513.01	HERC5	down
gene10504	236.312	-0.884267	0.358257	-2.46824	0.0135777	0.0293378	107.75	223.978	145.784	222.164	491.471	201.969	261.069	HERC6	no
gene10505	3302.62	-0.756645	0.239008	-3.16578	0.00154668	0.00461654	2125.81	2430.73	2551.22	3887.36	2694.35	5067	4361.89	PPM1K	no
gene10506	791.346	-0.474759	0.202325	-2.34652	0.0189496	0.038972	682.415	606.908	652.442	828.725	978.085	761.827	1029.02	ABCG2	no
gene10507	1788.09	-0.529306	0.204971	-2.58235	0.0098131	0.0222655	1099.94	1511.08	1669.34	1960.21	2125.17	2049.58	2101.27	PKD2	no
gene10508	6732.17	-0.648157	0.308449	-2.10135	0.0356106	0.0666383	8319.17	3342.12	3592.02	6631.87	7573.12	8014.13	9652.78	SPP1	no
gene10509	2.25354	-3.20312	1.91461	-1.67299	0.0943299	0.152145	0	1.03216	0	7.23326	0	2.42363	5.08576	MEPE	no
gene1051	735.446	-0.57619	0.211192	-2.72828	0.00636652	0.0154663	598.235	595.554	529.362	726.426	810.052	827.265	1061.23	GPR89A	no
gene10510	1.77098	-0.422473	1.55153	-0.272295	0.785395	0.839077	2.24478	1.03216	1.19495	2.06665	0.971286	4.03938	0.847627	IBSP	no
gene10513	5248.68	1.13431	0.257493	4.40521	1.06e-05	6.3e-05	8175.51	5542.68	9138.97	3425.47	3935.65	2360.61	4161.85	LAP3	up
gene10514	888.692	-0.0129954	0.213695	-0.0608125	0.951509	0.966371	741.901	801.985	1108.91	911.391	832.392	857.964	966.295	MED28	no
gene10515	75.3402	0.010248	0.313993	0.0326377	0.973964	0.982351	68.4659	93.9262	64.5272	58.8994	78.6742	83.2112	79.677	FAM184B	no
gene10517	1250.31	-0.856134	0.233338	-3.66907	0.000243431	0.000943496	914.75	838.111	811.37	1201.75	1424.88	1454.98	2106.35	NCAPG	no
gene1052	4491.34	0.0632629	0.260337	0.243004	0.808002	0.856965	6055.31	2756.89	5000.86	4373.02	4414.49	4036.15	4802.66	PDZK1	no
gene10520	1335.52	-1.96471	0.298033	-6.59225	4.33e-11	1.51e-09	517.423	662.644	326.221	1201.75	2096.03	2041.5	2503.04	LCORL	down
gene10527	2373.97	-0.985258	0.190143	-5.18168	2.2e-07	2.26e-06	1535.43	1551.33	1479.35	2537.84	3034.3	3526.38	2953.13	SLIT2	no
gene10529	424.618	-1.13828	0.253541	-4.48953	7.14e-06	4.47e-05	251.416	306.55	197.167	469.129	465.246	578.439	704.378	PACRGL	down
gene1053	1232.25	-0.656839	0.17668	-3.71768	0.000201057	0.000797328	887.812	993.966	898.601	1377.42	1521.03	1418.63	1528.27	RNF115	no
gene10530	1116.79	-2.67811	0.422269	-6.34219	2.27e-10	6.46e-09	307.536	366.415	145.784	879.358	1286.95	3565.16	1266.35	KCNIP4	down
gene10539	3438.34	-0.107206	0.223527	-0.479612	0.631503	0.712644	2695.99	3606.35	3577.68	3043.14	2921.63	3860.03	4363.58	ADGRA3	no
gene1054	394.465	0.214654	0.201101	1.0674	0.285793	0.380879	441.1	393.252	450.496	389.563	373.945	326.382	386.518	POLR3C	no
gene10541	26.9422	-1.14714	0.522941	-2.19362	0.0282624	0.054689	13.4687	17.5467	16.7293	23.7664	35.9376	21.8126	59.3339	LOC101103396	no
gene10542	642.804	-1.82582	0.31373	-5.81973	5.89e-09	1.02e-07	257.028	363.319	164.903	570.394	1032.48	1204.54	906.961	PPARGC1A	down
gene10545	4875.86	-0.846112	0.19416	-4.3578	1.31e-05	7.59e-05	2931.69	3588.81	3527.49	5625.41	5354.7	5971.01	7131.93	DHX15	no
gene10547	129.813	1.37337	0.314394	4.3683	1.25e-05	7.28e-05	158.257	187.852	253.329	87.8324	101.985	53.3198	66.1149	SOD3	up
gene10548	773.773	-0.533551	0.200091	-2.66654	0.00766373	0.0180733	610.581	658.516	579.55	881.424	798.397	1062.36	825.589	CCDC149	no
gene1055	210.843	0.751893	0.252301	2.98015	0.00288109	0.00783627	301.924	264.232	256.914	214.931	158.32	140.57	139.011	NUDT17	no
gene10550	63.7278	0.218307	0.390213	0.559457	0.57585	0.664397	42.6509	80.5082	84.8413	38.2329	70.9039	49.2804	79.677	LGI2	no
gene10551	690.812	-0.786361	0.20419	-3.85112	0.000117576	0.000505801	404.061	551.171	510.243	826.658	776.057	840.191	927.304	SEPSECS	no
gene10552	793.901	-0.266691	0.250214	-1.06585	0.286491	0.381534	508.444	721.477	904.576	786.359	768.287	792.526	1075.64	PI4K2B	no
gene10553	478.082	-0.962671	0.239958	-4.01184	6.02e-05	0.0002828	273.864	378.801	277.228	472.229	571.116	719.817	653.521	ZCCHC4	no
gene10554	1156.43	-0.534211	0.199535	-2.67728	0.00742225	0.0176123	982.093	997.063	782.691	1299.92	1218.96	1547.08	1267.2	ANAPC4	no
gene10555	12.0608	0.523487	0.624801	0.837847	0.402117	0.501949	16.8359	10.3216	16.7293	9.29991	10.6841	12.926	7.62864	SLC34A2	no
gene10556	503.929	0.490686	0.231353	2.12095	0.0339264	0.0639486	462.426	653.355	694.265	463.962	362.29	406.361	484.843	SEL1L3	no
gene10558	1888.22	-0.841086	0.30604	-2.74829	0.00599078	0.0146808	1758.79	1002.22	1139.98	1484.89	2358.28	1942.13	3531.21	SMIM20	no
gene1056	290.655	0.449355	0.249471	1.80123	0.071667	0.120751	272.741	393.252	363.264	296.564	203.97	283.564	221.231	PIAS3	no
gene10562	4631.66	-0.462912	0.170005	-2.72292	0.00647069	0.0156815	3856.54	3620.8	3948.11	4738.82	5508.16	5365.91	5383.28	RBPJ	no
gene10564	3.01957	-1.55803	1.3275	-1.17366	0.240533	0.330305	1.12239	3.09647	0	3.09997	3.88514	4.84725	5.08576	CCKAR	no
gene10565	679.451	-1.18417	0.214461	-5.52161	3.36e-08	4.49e-07	374.879	447.956	357.29	712.993	920.779	940.367	1001.9	TBC1D19	down
gene10566	1192.06	-0.269248	0.192971	-1.39528	0.162933	0.239195	985.461	1073.44	1142.37	1087.06	1333.58	1276.44	1446.05	STIM2	no
gene1057	2104.33	1.32332	0.215677	6.13566	8.48e-10	1.98e-08	3667.98	2715.6	3226.36	1509.68	1009.17	1236.86	1364.68	ANKRD35	up
gene10574	7812.57	-1.26441	0.237169	-5.33126	9.75e-08	1.13e-06	4271.83	4773.72	3966.03	7611.46	9268.98	10707.6	14088.4	PCDH7	down
gene1058	130.477	-0.114018	0.369221	-0.308808	0.757467	0.817101	107.75	179.595	86.0363	194.265	101.014	160.767	83.9151	ITGA10	no
gene10582	4246.63	-1.36537	0.242707	-5.6256	1.85e-08	2.72e-07	1725.12	2779.6	2197.51	4555.92	4971.04	6433.92	7063.28	ARAP2	down
gene10583	170.261	-1.49753	0.330365	-4.53296	5.82e-06	3.75e-05	53.8748	112.505	83.6464	164.298	217.568	231.052	328.879	LOC106991214	down
gene10584	6.01507	-1.28557	1.00054	-1.28487	0.198837	0.281769	6.73435	3.09647	0	10.3332	7.77029	4.84725	9.3239	DTHD1	no
gene10585	6.81336	-1.50611	0.912352	-1.6508	0.0987789	0.158008	2.24478	4.12862	3.58485	9.29991	5.82772	5.65513	16.9525	NWD2	no
gene10586	17.4221	-1.29994	0.679088	-1.91424	0.0555897	0.0975357	7.85675	13.418	7.16969	5.16661	33.0237	29.8914	25.4288	C6H4orf19	no
gene10588	1337.47	-0.330833	0.197978	-1.67106	0.0947105	0.152672	1144.84	1135.37	1217.65	1258.59	1340.37	1508.3	1757.13	RELL1	no
gene1059	664.597	-0.0217541	0.18823	-0.115572	0.907992	0.933261	699.25	605.876	671.561	656.16	710.981	610.754	697.597	PEX11B	no
gene10590	951.537	0.179081	0.282429	0.634075	0.526032	0.620055	587.011	1339.74	1131.62	1053.99	753.718	821.61	973.076	PGM2	no
gene10591	714.598	-0.365302	0.269132	-1.35734	0.174674	0.253023	451.202	839.143	549.676	777.059	1024.71	638.222	722.178	TBC1D1	no
gene10596	5875.49	-0.484816	0.196776	-2.4638	0.0137472	0.0296515	4353.76	5079.24	4918.41	6446.9	5534.39	7967.27	6828.48	KLF3	no
gene10598	3.37707	0.496248	1.18586	0.418472	0.675602	0.750522	2.24478	6.19294	3.58485	6.19994	2.91386	0.807876	1.69525	TLR10	no
gene10599	26.0408	0.709919	0.564933	1.25664	0.208883	0.2935	14.5911	63.9937	21.5091	24.7998	24.2821	16.1575	16.9525	TLR1	no
gene1060	76.1562	-1.32789	0.427092	-3.10915	0.00187628	0.00544831	48.2629	43.3506	31.0687	44.4329	125.296	155.92	84.7627	LOC101114745	down
gene10600	104.54	0.713912	0.309445	2.30708	0.0210506	0.0426361	89.7914	163.081	150.564	83.6992	89.3583	65.4379	89.8485	TLR6	no
gene10601	1891.97	-0.123741	0.208408	-0.593746	0.552682	0.643734	1740.83	1606.04	2052.92	1738.05	2414.62	1740.97	1950.39	FAM114A1	no
gene10602	43.907	-0.911705	0.409973	-2.22382	0.0261608	0.0511258	17.9583	35.0933	34.6535	37.1996	59.2484	63.0143	60.1815	TMEM156	no
gene10603	916.506	-0.729366	0.223539	-3.26281	0.00110312	0.00343846	540.993	729.734	727.724	851.458	1250.04	1156.88	1158.71	KLHL5	no
gene10605	616.029	-0.7676	0.207434	-3.70046	0.000215211	0.000845835	365.9	529.496	423.012	718.159	755.66	771.521	748.455	WDR19	no
gene10606	2045.08	-0.471133	0.225092	-2.09307	0.0363429	0.0677714	2058.47	1425.41	1542.68	1831.05	2266.98	2426.86	2764.11	RFC1	no
gene10608	73.884	-1.07079	0.312686	-3.42448	0.000615966	0.0020927	48.2629	40.2541	47.7979	79.5659	93.2434	95.3293	112.734	KLB	down
gene10609	8727.65	-0.798214	0.296249	-2.6944	0.0070516	0.0168741	8660.38	5632.48	4116.6	6678.37	13193.9	10465.2	12346.5	RPL9	no
gene1061	1085.44	-0.52702	0.197277	-2.67147	0.00755193	0.0178515	1007.91	761.731	831.684	1141.82	1214.11	1248.17	1392.65	RBM8A	no
gene10610	577.844	-0.416093	0.204071	-2.03896	0.0414541	0.0759526	548.85	447.956	458.86	681.993	549.748	697.197	660.302	LIAS	no
gene10611	2070.83	-0.329417	0.214764	-1.53386	0.125064	0.192389	1664.51	2034.38	1719.53	2260.91	1718.2	2674.88	2423.37	UGDH	no
gene10612	2631.17	-0.234677	0.209233	-1.1216	0.262031	0.355162	2244.78	1984.84	2940.77	2652.54	2856.55	2544	3194.71	SMIM14	no
gene10613	4569.51	-0.745336	0.195792	-3.80677	0.000140794	0.000589224	3326.77	3002.54	3558.56	4522.85	5393.55	5801.36	6380.94	UBE2K	no
gene10614	4780.19	-0.576051	0.197895	-2.91089	0.003604	0.00948275	3176.37	3698.22	4325.71	4979.58	5216.78	5693.91	6370.77	PDS5A	no
gene10617	2346.81	-0.752331	0.276203	-2.72383	0.006453	0.0156475	1255.96	1699.96	2105.5	2097.65	2274.75	2944.71	4049.11	N4BP2	no
gene10618	170.593	-0.591256	0.278394	-2.12381	0.0336863	0.063573	145.911	93.9262	157.733	163.265	184.544	233.476	215.297	RHOH	no
gene1062	493.942	0.172579	0.236284	0.730388	0.465153	0.563842	402.939	552.204	628.543	470.162	564.317	424.943	414.49	LIX1L	no
gene10621	1751.38	-1.28195	0.189144	-6.77767	1.22e-11	5.2e-10	1004.54	923.78	961.934	1967.45	2397.13	2644.18	2360.64	RBM47	down
gene10622	247.753	-1.62041	0.271076	-5.9777	2.26e-09	4.54e-08	134.687	115.601	89.6211	333.763	369.089	433.829	257.679	NSUN7	down
gene10623	6323.31	-1.24249	0.224353	-5.53811	3.06e-08	4.15e-07	3050.66	4766.5	2835.61	8451.55	8367.63	8876.94	7914.29	APBB2	down
gene10625	92.712	-0.0309136	0.391603	-0.0789412	0.937079	0.955153	108.872	62.9615	102.766	130.199	90.3296	42.8174	111.039	UCHL1	no
gene10626	1293.01	-0.738328	0.260294	-2.83651	0.00456094	0.0116215	736.289	1146.73	923.695	1327.82	2215.5	1419.44	1281.61	LIMCH1	no
gene10628	3164.81	-0.299805	0.232373	-1.29019	0.196985	0.279748	2300.9	2416.28	3670.88	3340.73	2973.11	3301.79	4149.98	TMEM33	no
gene1063	3.39358	0.470718	1.09751	0.428898	0.667997	0.743524	3.36718	5.16078	3.58485	2.06665	2.91386	2.42363	4.23814	ANKRD34A	no
gene10630	1546.87	-0.433066	0.217743	-1.98889	0.0467135	0.0840754	1426.56	1292.26	1148.35	1467.32	1645.36	1601.21	2247.06	SLC30A9	no
gene10631	4.14655	0.425515	1.02265	0.41609	0.677344	0.752116	4.48957	4.12862	5.97474	4.13329	1.94257	2.42363	5.93339	BEND4	no
gene10632	78.5603	-0.282865	0.488249	-0.579345	0.562356	0.652394	66.2212	83.6047	59.7474	43.3996	170.946	92.0978	33.9051	SHISA3	no
gene10633	2663.72	-1.46752	0.243804	-6.01927	1.75e-09	3.66e-08	1502.88	1199.37	1276.21	2816.84	2924.54	4895.73	4030.47	ATP8A1	down
gene10634	4.67122	-1.27246	1.095	-1.16206	0.24521	0.335555	4.48957	2.06431	1.19495	8.26658	1.94257	10.5024	4.23814	GRXCR1	no
gene10636	59.5329	-0.183995	0.419564	-0.438539	0.660995	0.73741	72.9555	62.9615	29.8737	38.2329	62.1623	92.9057	57.6386	KCTD8	no
gene10638	213.626	-0.312605	0.914574	-0.341804	0.732498	0.796992	270.497	23.7396	268.863	180.832	378.802	75.1324	297.517	YIPF7	no
gene10639	17.4335	1.04772	0.736441	1.42268	0.15483	0.229303	20.2031	5.16078	48.9929	9.29991	10.6841	5.65513	22.0383	GUF1	no
gene1064	685.932	0.0359554	0.201804	0.17817	0.85859	0.896111	784.552	619.294	683.511	623.094	716.809	614.793	759.474	POLR3GL	no
gene10640	1783.43	-1.02117	0.21086	-4.84287	1.28e-06	1.02e-05	1038.21	1287.1	1043.19	1847.58	2128.09	2449.48	2690.37	GNPDA2	down
gene10644	17.8663	-0.922473	0.620759	-1.48604	0.137268	0.207762	19.0807	10.3216	5.97474	18.5998	30.1099	11.3103	29.6669	GABRG1	no
gene10645	35.031	-0.942519	0.465675	-2.02398	0.0429718	0.0783888	15.7135	36.1255	16.7293	35.133	52.4494	33.1229	55.9434	GABRA2	no
gene10647	14.9632	-1.19181	0.799684	-1.49035	0.136132	0.20637	3.36718	8.25725	14.3394	3.09997	40.794	14.5418	20.3431	LOC101121518	no
gene10648	3.07396	-0.345212	1.39911	-0.246736	0.805112	0.854695	0	2.06431	5.97474	1.03332	4.85643	0.807876	6.78102	GABRA4	no
gene10649	12426.3	0.413427	0.270502	1.52837	0.12642	0.194161	14844.8	11779	16844	12284.1	8906.69	7209.48	15115.7	GABRB1	no
gene1065	17632.3	0.230205	0.237667	0.968603	0.332743	0.43028	20662.1	16250.3	20853	16021.7	17293.7	11368.4	20977.1	TXNIP	no
gene10654	840.286	-0.671545	0.247161	-2.71703	0.00658699	0.0159115	457.936	636.84	788.666	880.391	918.836	935.52	1263.81	COMMD8	no
gene10655	1794.98	-0.338519	0.240601	-1.40697	0.159436	0.234849	1049.44	1654.55	1974.06	2093.51	1990.16	1726.43	2076.69	ATP10D	no
gene10658	248.179	-1.23785	0.279191	-4.43369	9.26e-06	5.61e-05	127.953	155.856	135.029	306.897	470.102	297.298	244.117	CORIN	down
gene10662	523.245	-0.65783	0.222069	-2.96228	0.00305367	0.0082394	345.697	452.084	382.384	489.795	651.733	635.798	705.226	NFXL1	no
gene10663	2.83271	-0.507268	1.68477	-0.30109	0.763346	0.821577	5.61196	0	1.19495	11.3666	0	0.807876	0.847627	CNGA1	no
gene10664	640.117	-0.0183686	0.333254	-0.0551188	0.956044	0.969122	331.106	579.04	996.587	749.159	449.705	647.108	728.112	NIPAL1	no
gene10665	44.2955	-1.29777	0.425153	-3.05247	0.00226969	0.00639928	17.9583	35.0933	19.1192	64.066	67.0187	68.6694	38.1432	TXK	down
gene10666	1548.65	-0.882831	0.238818	-3.69667	0.000218442	0.000857238	1000.05	1066.22	1068.28	2063.55	1280.15	2421.2	1941.07	TEC	no
gene10668	3233.55	-0.310025	0.194775	-1.59171	0.11145	0.174924	2401.92	2832.24	3298.06	3362.43	3458.75	3300.98	3980.46	SLAIN2	no
gene10669	6.025	-0.16424	0.8577	-0.191489	0.848143	0.888298	4.48957	4.12862	8.36464	6.19994	5.82772	8.07876	5.08576	SLC10A4	no
gene10670	45.6738	-1.72975	0.483341	-3.57872	0.000345276	0.00127631	22.4478	18.5788	17.9242	39.2663	110.727	74.3246	36.448	ZAR1	down
gene10671	4390	-1.07596	0.212734	-5.05776	4.24e-07	3.93e-06	2159.48	3303.93	2600.21	4911.38	5499.42	5862.75	6392.8	FRYL	down
gene10673	7108.87	-0.346705	0.181869	-1.90634	0.0566058	0.0990626	5948.68	5595.32	6917.56	7227.06	7571.17	7754.8	8747.51	OCIAD1	no
gene10674	2147.17	-0.813987	0.251944	-3.23082	0.00123434	0.00379449	1435.54	1346.96	1712.36	2582.27	2299.03	1922.74	3731.25	OCIAD2	no
gene10675	849.905	-0.446034	0.232202	-1.92089	0.0547459	0.0962825	579.154	663.676	869.923	1047.79	772.172	893.511	1123.11	CWH43	no
gene10676	2941.53	-1.03983	0.191923	-5.41797	6.03e-08	7.52e-07	1778.99	1984.84	1739.85	3301.47	3391.73	4104.01	4289.84	DCUN1D4	down
gene10678	109.619	0.143434	0.387807	0.369859	0.711488	0.77945	85.3018	148.63	113.52	156.032	46.6217	98.5608	118.668	LRRC66	no
gene10679	294.121	0.171544	0.363573	0.471829	0.637049	0.717294	152.645	293.132	497.099	342.03	224.367	200.353	349.222	SGCB	no
gene10681	2.75811	-3.51727	1.81264	-1.94041	0.0523294	0.092604	1.12239	0	0	0	5.82772	7.27088	5.08576	SPATA18	no
gene10684	2036.38	-0.513692	0.193748	-2.65134	0.00801734	0.0187521	1401.87	1563.72	1944.18	2376.64	2153.34	2421.2	2393.7	USP46	no
gene10686	134.583	-0.0686575	0.269567	-0.254695	0.798959	0.850009	139.177	118.698	135.029	153.965	108.784	121.989	164.44	RASL11B	no
gene10687	1393.41	-0.914539	0.224831	-4.06768	4.75e-05	0.00023061	919.239	1061.06	795.836	1374.32	1755.11	1652.11	2196.2	SCFD2	no
gene10688	1577.61	-0.336916	0.195392	-1.7243	0.0846532	0.139122	1238	1513.14	1363.44	1456.99	1709.46	1816.1	1946.15	FIP1L1	no
gene10689	1191.28	-0.996778	0.260579	-3.82524	0.000130644	0.000553523	713.842	703.931	860.363	1952.98	1047.05	1842.76	1218.04	LNX1	no
gene10690	1445.29	-0.686575	0.240158	-2.85885	0.0042518	0.0109348	1018.01	1147.76	1050.36	1236.89	1699.75	1621.41	2342.84	CHIC2	no
gene10693	2428.79	0.0837131	0.254559	0.328856	0.742265	0.805083	1592.67	2699.09	3237.12	2378.71	2721.54	2301.64	2070.75	PDGFRA	no
gene10696	246.277	-0.376251	0.257614	-1.46052	0.144146	0.216201	158.257	227.074	246.159	271.764	263.218	332.845	224.621	KIT	no
gene10698	736.889	0.85296	0.271176	3.14541	0.00165854	0.0049042	588.134	1120.92	1258.28	613.794	559.461	472.607	545.024	KDR	no
gene10699	356.991	0.0975673	0.242974	0.401555	0.688012	0.760807	442.223	314.808	356.095	262.464	354.519	412.824	356.003	SRD5A3	no
gene107	2103.5	0.274776	0.178929	1.53567	0.124619	0.191876	2306.52	2223.26	2474.74	1925.08	2166.94	1875.89	1752.05	USP40	no
gene10700	1403.88	-0.519536	0.170326	-3.05025	0.00228648	0.00643814	1105.56	1146.73	1123.25	1605.78	1538.52	1604.44	1702.88	TMEM165	no
gene10701	1500.31	-0.813496	0.214954	-3.78452	0.000154008	0.00063735	1022.5	1035.25	1083.82	1348.49	2165	1934.86	1912.25	CLOCK	no
gene10702	2.9221	-2.6398	1.51014	-1.74805	0.080456	0.13312	1.12239	1.03216	0	3.09997	7.77029	4.03938	3.39051	PDCL2	no
gene10703	9.90705	1.15391	1.08906	1.05954	0.289352	0.384483	37.039	5.16078	1.19495	0	13.598	7.27088	5.08576	NMU	no
gene10706	1597.08	-0.701852	0.184935	-3.79513	0.000147565	0.000614255	1087.6	1177.69	1263.06	1739.08	1876.52	1859.73	2175.86	EXOC1	no
gene10708	343.259	-0.954036	0.301	-3.16955	0.00152674	0.0045642	167.236	334.419	168.488	326.53	465.246	412.824	528.072	CEP135	no
gene10709	262.808	-0.383739	0.317428	-1.2089	0.226701	0.314454	278.353	173.402	219.871	210.798	433.194	323.15	200.888	KIAA1211	no
gene10710	753.222	-0.817792	0.211363	-3.86913	0.000109223	0.000474158	471.405	516.078	586.72	874.191	779.943	935.52	1108.7	AASDH	no
gene10711	235.87	-0.521023	0.239354	-2.17679	0.0294964	0.0567941	217.744	180.627	168.488	235.598	290.414	317.495	240.726	LOC105615499	no
gene10712	11.1508	-2.57838	0.813583	-3.16916	0.0015288	0.00456876	3.36718	5.16078	0	15.4998	18.4544	17.7733	17.8002	PPAT	down
gene10713	49.6547	-1.04744	0.369908	-2.83162	0.00463128	0.0117674	26.9374	39.2219	26.2889	58.8994	51.4782	72.7088	72.0483	PAICS	no
gene10714	4103.79	-0.420862	0.22467	-1.87325	0.0610342	0.105572	4243.77	2855.98	3215.61	3712.73	4510.65	4578.23	5609.6	SRP72	no
gene10715	11.8808	-1.33707	0.704134	-1.89888	0.0575799	0.100533	11.2239	3.09647	4.77979	11.3666	20.397	15.3496	16.9525	ARL9	no
gene10719	11982.2	-0.672986	0.258709	-2.60133	0.00928639	0.0212296	10078	7963.09	8792.43	10457.2	12573.3	12774.9	21236.5	HOPX	no
gene10721	1426.69	-0.538371	0.191336	-2.81375	0.00489671	0.0123574	1028.11	1097.18	1276.21	1451.82	1659.93	1635.95	1837.66	LOC101110593	no
gene10723	8.03695	-0.351738	0.773791	-0.454565	0.649422	0.727727	7.85675	9.28941	3.58485	7.23326	12.6267	8.88663	6.78102	LOC101118448	no
gene10726	1157.71	-0.326535	0.196929	-1.65813	0.0972906	0.156052	982.093	1003.26	1047.97	1143.89	1157.77	1227.16	1541.83	LOC101111099	no
gene10727	414.592	0.121219	0.19547	0.620141	0.535165	0.628309	446.712	397.38	460.055	395.763	387.543	428.174	386.518	NOA1	no
gene10728	5362.05	-0.635371	0.205257	-3.09549	0.00196489	0.00567177	3452.48	3961.42	4808.47	5307.15	6144.35	6681.94	7178.55	POLR2B	no
gene10731	2349	0.655608	0.251524	2.60654	0.00914618	0.0209511	3140.45	2604.13	3160.64	1539.65	2668.12	1402.47	1927.5	IGFBP7	no
gene10736	12044.8	-2.44253	0.20342	-12.0073	3.25e-33	1.39e-29	3684.81	3645.58	2891.78	15165	17591.9	20427.9	20906.7	ADGRL3	down
gene10739	4.4386	-3.28295	1.38925	-2.36311	0.0181223	0.0375079	0	1.03216	1.19495	5.16661	7.77029	4.03938	11.8668	TECRL	no
gene10742	61.4326	-2.04662	0.377477	-5.42185	5.9e-08	7.38e-07	24.6926	26.8361	14.3394	67.166	94.2147	99.3687	103.411	EPHA5	down
gene10747	1572.31	-0.929094	0.228185	-4.07167	4.67e-05	0.000227205	1022.5	1088.92	998.977	1394.99	1992.11	2030.19	2478.46	CENPC	no
gene10748	147.562	-1.4012	0.294209	-4.76259	1.91e-06	1.44e-05	72.9555	100.119	54.9676	159.132	214.654	196.314	234.793	STAP1	down
gene10749	2714.41	-0.887113	0.23829	-3.72282	0.00019701	0.000784369	1454.62	1910.52	2117.45	2539.91	3168.33	3479.52	4330.53	UBA6	no
gene10751	60.9926	-1.24617	0.363349	-3.42968	0.000604292	0.00205927	26.9374	34.0612	41.8232	70.266	66.0474	110.679	77.1341	GNRHR	down
gene10752	32.8294	-0.227063	0.458083	-0.495682	0.620119	0.702207	31.427	15.4823	43.0181	38.2329	39.8227	35.5465	26.2764	TMPRSS11D	no
gene10753	6.64966	-1.6767	1.01603	-1.65024	0.0988938	0.158134	2.24478	4.12862	2.3899	8.26658	19.4257	1.61575	8.47627	TMPRSS11A	no
gene10754	3.19854	-2.7755	1.55342	-1.7867	0.0739854	0.124048	1.12239	1.03216	0	8.26658	7.77029	0.807876	3.39051	LOC101121267	no
gene10755	1569.61	-1.0852	0.255318	-4.2504	2.13e-05	0.00011518	781.185	894.879	1193.75	2601.91	1398.65	2033.42	2083.47	TMPRSS11F	down
gene10756	6.28081	-0.32371	0.943953	-0.34293	0.731651	0.79628	3.36718	7.22509	5.97474	4.13329	1.94257	14.5418	6.78102	LOC101115964	no
gene10757	2.11951	-1.99875	1.87428	-1.06641	0.28624	0.381326	0	0	2.3899	5.16661	4.85643	2.42363	0	TMPRSS11B	no
gene10758	1910.53	-0.631372	0.275244	-2.29386	0.0217984	0.043879	1535.43	1039.38	1788.84	1427.02	2396.16	2854.22	2332.67	LOC101121777	no
gene10760	25.8641	-1.43923	0.60298	-2.38686	0.0169928	0.0354751	21.3255	16.5145	1.19495	34.0997	29.1386	35.5465	43.229	LOC105615508	no
gene10762	4686.06	-0.493454	0.180366	-2.73584	0.00622207	0.0151844	4156.22	3717.83	3527.49	4897.95	5002.12	5559.8	5941.02	YTHDC1	no
gene10774	4.87549	-2.76994	1.20752	-2.29391	0.0217958	0.043879	2.24478	0	1.19495	6.19994	8.74157	7.27088	8.47627	LOC101122788	no
gene10781	34.7582	-1.18307	0.547875	-2.15938	0.030821	0.0589925	8.97914	13.418	38.2384	36.1663	74.789	41.2017	30.5146	SULT1B1	no
gene10793	4.88051	-2.81068	1.24729	-2.25343	0.0242321	0.0479261	2.24478	1.03216	0	4.13329	8.74157	12.926	5.08576	LOC105615578	no
gene10795	1.89719	-4.02219	1.87164	-2.14901	0.0316333	0.0602439	0	0	0	3.09997	1.94257	4.84725	3.39051	MUC7	no
gene10797	6.43863	-1.78136	1.12576	-1.58236	0.113567	0.177594	0	1.03216	7.16969	2.06665	16.5119	7.27088	11.0192	AMTN	no
gene10799	571.653	1.28732	0.220712	5.83259	5.46e-09	9.57e-08	934.953	927.908	724.139	436.062	344.806	316.687	317.013	AMBN	up
gene108	374.419	0.365257	0.235139	1.55337	0.120336	0.186508	372.634	534.657	379.994	391.629	307.898	342.539	291.584	DGKD	no
gene10800	38.0241	-2.06581	0.483082	-4.27631	1.9e-05	0.000104277	12.3463	20.6431	7.16969	54.7661	39.8227	50.8962	80.5246	ENAM	down
gene10801	267.233	0.821324	0.329509	2.49257	0.0126822	0.0276827	286.21	557.364	222.26	175.665	209.798	159.959	259.374	JCHAIN	no
gene10802	863.557	0.208517	0.243674	0.855721	0.392152	0.491519	1093.21	773.085	940.425	719.193	844.047	619.641	1055.3	UTP3	no
gene10803	1804.9	-0.867905	0.216085	-4.01649	5.91e-05	0.000278112	1336.77	1397.54	945.204	2236.11	1877.5	2369.5	2471.68	RUFY3	no
gene10804	1461.25	0.573108	0.224432	2.55359	0.0106617	0.0238946	1615.12	1516.24	2263.23	1186.25	1218.96	1006.61	1422.32	GRSF1	no
gene10805	5458.07	-0.893039	0.211866	-4.2151	2.5e-05	0.000131564	3084.33	3482.5	4424.89	6314.64	6054.03	6617.31	8228.76	MOB1B	no
gene10806	305.416	-0.13856	0.270671	-0.511913	0.608712	0.692547	206.52	284.875	375.214	314.13	290.414	264.983	401.775	DCK	no
gene10807	849.349	-1.10216	0.246103	-4.47846	7.52e-06	4.68e-05	349.064	605.876	584.33	975.457	1265.59	1182.73	982.4	SLC4A4	down
gene10809	2.62538	-1.75107	1.61775	-1.08241	0.279069	0.373519	3.36718	0	0	1.03332	3.88514	1.61575	8.47627	GC	no
gene10812	148.639	-1.35998	0.295415	-4.60362	4.15e-06	2.82e-05	79.6899	90.8297	64.5272	146.732	263.218	214.087	181.392	ADAMTS3	down
gene10816	364.263	-0.87684	0.220309	-3.98004	6.89e-05	0.000317885	208.765	271.457	259.304	391.629	463.303	514.617	440.766	LOC101103154	no
gene10817	5177.36	-0.241499	0.220425	-1.0956	0.273252	0.36743	5010.36	4564.19	4493.01	4114.69	6259.94	5023.37	6775.93	ANKRD17	no
gene10818	135	-0.863334	0.421979	-2.04592	0.0407644	0.0748734	127.953	45.4149	102.766	96.099	271.96	191.467	109.344	ALB	no
gene10819	1.93794	-2.95953	1.80607	-1.63866	0.101284	0.161413	0	0	1.19495	2.06665	2.91386	4.84725	2.54288	AFP	no
gene10822	10.8427	0.0784707	0.807278	0.097204	0.922564	0.944153	5.61196	3.09647	25.0939	7.23326	6.799	15.3496	12.7144	LOC101102731	no
gene10823	567.491	-0.898139	0.240785	-3.73004	0.000191447	0.000765253	301.924	429.377	408.672	683.026	579.858	659.227	910.352	RASSF6	no
gene10824	10.0032	-1.39301	0.828362	-1.68165	0.0926369	0.149909	0	7.22509	8.36464	11.3666	10.6841	13.7339	18.6478	CXCL8	no
gene10826	26.4921	1.22745	0.500256	2.45365	0.0141414	0.0303792	24.6926	57.8007	35.8485	12.3999	12.6267	23.4284	18.6478	LOC101103238	no
gene10830	25.783	1.34023	0.509274	2.63165	0.00849719	0.01971	47.1405	36.1255	34.6535	15.4998	27.196	9.69451	10.1715	PF4	no
gene10834	115.843	-0.878257	0.290547	-3.02277	0.00250473	0.00695757	86.4242	82.5725	65.7222	147.765	169.004	154.304	105.106	LOC101104661	no
gene10835	438.114	-1.0815	0.289372	-3.7374	0.000185932	0.000747576	253.661	371.576	176.852	453.629	511.868	744.861	554.348	MTHFD2L	down
gene10836	173.622	-0.423813	0.298391	-1.42033	0.155513	0.230041	107.75	154.823	173.268	230.431	145.693	156.728	246.659	EPGN	no
gene10837	727.168	-0.300703	0.309507	-0.971556	0.331271	0.428784	539.871	599.683	787.471	637.56	455.533	892.703	1177.35	EREG	no
gene10838	1141.7	-0.352414	0.218628	-1.61193	0.106976	0.169035	1183	883.526	891.432	1102.56	1129.61	1542.23	1259.57	AREG	no
gene10840	359.648	-0.691944	0.216886	-3.19036	0.00142093	0.00428385	257.028	305.518	235.405	444.329	368.117	444.332	462.804	BTC	no
gene10841	1209.7	0.166451	0.274131	0.607195	0.543721	0.635885	1394.01	785.471	1690.85	1128.39	1436.53	1016.31	1016.3	PARM1	no
gene10843	1176.92	-0.439549	0.207261	-2.12075	0.033943	0.0639657	943.932	1005.32	984.638	1300.95	1082.01	1278.06	1643.55	RCHY1	no
gene10844	101.3	-0.704907	0.314464	-2.24161	0.0249863	0.049111	56.1196	66.058	101.571	139.499	94.2147	122.797	128.839	THAP6	no
gene10847	337.206	-0.641557	0.215369	-2.97888	0.00289307	0.00786636	236.825	238.428	291.567	385.429	357.433	401.514	449.242	CDKL2	no
gene10848	1929.09	0.108031	0.216017	0.500106	0.617001	0.699928	1592.67	1996.19	2447.25	1895.11	2024.16	1566.47	1981.75	G3BP2	no
gene10849	3288.39	-0.153905	0.186708	-0.824305	0.409766	0.50986	2654.46	3200.72	3413.97	3285.97	3315.97	3298.56	3849.07	USO1	no
gene10851	206.666	-0.193133	0.282209	-0.684361	0.493747	0.590342	230.09	166.177	176.852	275.897	151.521	252.865	193.259	PPEF2	no
gene10852	343.716	-0.329802	0.2053	-1.60644	0.108177	0.170664	271.619	341.644	285.593	384.396	372.974	369.199	380.585	NAAA	no
gene10853	1612.17	-0.564139	0.204795	-2.75465	0.00587543	0.0144312	1271.67	1238.59	1288.15	1823.81	1454.99	2026.15	2181.79	SDAD1	no
gene10854	109.979	-0.565603	0.521546	-1.08447	0.278155	0.372616	71.8331	62.9615	124.275	32.033	273.903	109.063	95.7819	CXCL9	no
gene10855	63.1526	-1.08729	0.358468	-3.03314	0.0024202	0.00674578	31.427	36.1255	47.7979	94.0324	95.186	82.4033	55.0958	ART3	down
gene10858	1067.36	-0.90713	0.198842	-4.56207	5.07e-06	3.34e-05	685.782	785.471	663.196	1226.55	1163.6	1418.63	1528.27	NUP54	no
gene10859	1946.3	-0.235253	0.228906	-1.02773	0.304078	0.400442	1268.3	1810.4	2223.8	2218.54	1859.04	2016.46	2227.56	SCARB2	no
gene10861	187.901	-0.589506	0.266117	-2.21521	0.0267457	0.0520841	160.502	153.791	123.08	193.231	232.137	173.693	278.869	FAM47E	no
gene10864	920.649	0.40556	0.238156	1.70292	0.0885831	0.144553	1139.23	867.011	1205.7	832.858	730.407	630.143	1039.19	STBD1	no
gene10865	285.751	-0.648372	0.268304	-2.41656	0.0156681	0.0331017	205.398	227.074	215.091	331.697	224.367	347.387	449.242	CCDC158	no
gene10867	1815	-0.556311	0.172255	-3.22959	0.00123969	0.00380774	1413.09	1471.85	1406.45	1950.91	2089.24	2279.83	2093.64	SHROOM3	no
gene10870	89.178	1.78148	0.318615	5.59132	2.25e-08	3.2e-07	145.911	123.859	180.437	35.133	40.794	38.778	59.3339	SOWAHB	up
gene10871	4474.49	0.0315909	0.171024	0.184717	0.853451	0.892546	4143.87	4504.33	4943.5	4585.89	4422.26	4213.88	4507.68	2021-09-11	no
gene10873	7804.78	0.706491	0.227004	3.11224	0.00185673	0.00539876	11157.7	7590.48	11318.6	5967.44	6889.33	4806.86	6903.08	CCNI	no
gene10874	1081.08	-0.20399	0.266791	-0.764606	0.444506	0.544566	901.281	730.767	1352.68	1239.99	963.516	929.865	1449.44	CCNG2	no
gene10877	130.607	-1.0294	0.897348	-1.14716	0.251317	0.342815	58.3644	85.669	101.571	115.732	439.993	30.6993	82.2198	CXCL13	no
gene10878	4454.23	-0.572751	0.217185	-2.63716	0.00836038	0.0194401	2929.44	3517.59	4005.47	4256.26	4692.28	5393.38	6385.18	CNOT6L	no
gene10879	1634.26	-1.044	0.291938	-3.57611	0.000348741	0.00128745	1313.2	850.497	887.847	1262.72	2118.37	1993.84	3013.31	MRPL1	down
gene10880	988.439	-1.25294	0.381273	-3.28619	0.00101551	0.00320628	571.298	791.664	292.762	788.425	2209.68	1421.86	843.389	FRAS1	down
gene10882	978.104	-0.657117	0.179865	-3.65339	0.000258802	0.000993381	753.125	731.799	721.749	1266.85	1082.01	1187.58	1103.61	ANXA3	no
gene10885	946.98	-0.186509	0.242299	-0.769748	0.441449	0.541636	684.659	960.937	988.222	749.159	916.894	1211.81	1117.17	BMP2K	no
gene10886	2599.87	-0.177198	0.223688	-0.792164	0.428265	0.528392	1928.27	2316.16	3013.66	2905.7	2182.48	2895.43	2957.37	PAQR3	no
gene10889	944.438	0.107379	0.280992	0.382143	0.702356	0.772167	650.988	1033.19	1270.23	749.159	1274.33	796.565	836.608	ANTXR2	no
gene10891	150.099	0.0157867	0.258461	0.0610795	0.951296	0.966213	143.666	153.791	155.343	178.765	154.434	150.265	114.43	PRDM8	no
gene10892	421.727	-1.0034	0.354219	-2.8327	0.00461572	0.011733	358.043	327.194	118.3	350.296	506.04	680.231	611.987	FGF5	no
gene10893	340.923	-2.46104	0.375479	-6.55442	5.59e-11	1.88e-09	139.177	108.376	38.2384	353.396	435.136	706.083	606.053	C6H4orf22	down
gene10896	490.575	-0.787425	0.217869	-3.61422	0.000301259	0.00113171	306.413	337.515	396.723	546.628	534.207	594.597	717.94	BMP3	no
gene10897	56.81	-0.62952	0.383478	-1.64161	0.100671	0.1606	24.6926	52.64	52.5777	48.5662	78.6742	72.7088	67.8102	PRKG2	no
gene10898	2936.66	-0.712157	0.180846	-3.93791	8.22e-05	0.000370752	2183.05	2092.18	2180.78	3208.47	3181.93	3872.15	3838.06	RASGEF1B	no
gene109	4.92279	-1.33806	1.02337	-1.30751	0.19104	0.272618	4.48957	1.03216	2.3899	7.23326	6.799	4.03938	8.47627	SAG	no
gene10904	207.459	-1.65173	0.278824	-5.92392	3.14e-09	5.95e-08	109.994	107.344	62.1373	262.464	296.242	354.657	259.374	LOC105609538	down
gene10905	7334.94	-0.0823622	0.183433	-0.449005	0.653428	0.731019	7542.48	7259.15	6488.57	6566.77	7692.58	7261.99	8533.06	HNRNPD	no
gene10908	6168.95	-0.768648	0.208084	-3.69393	0.000220811	0.000865628	4749.96	4742.76	3706.73	6070.77	7034.05	8569.95	8308.44	HNRNPDL	no
gene10909	2642.4	-0.458394	0.170493	-2.68863	0.00717454	0.0171395	2306.52	2193.33	2031.41	2933.6	2895.4	2935.01	3201.49	ENOPH1	no
gene10910	1096.06	-0.651657	0.206123	-3.1615	0.0015696	0.00467763	726.188	870.108	883.067	1073.62	1535.6	1303.91	1279.92	TMEM150C	no
gene10911	280.352	-0.0212932	0.30327	-0.0702119	0.944025	0.960368	197.541	308.615	327.416	295.53	406.969	206.008	220.383	SCD5	no
gene10912	2347.94	0.318681	0.207176	1.53821	0.123996	0.191107	2055.1	2966.42	2921.65	2153.44	2304.86	1872.66	2161.45	SEC31A	no
gene10914	555.595	-0.761048	0.228931	-3.32436	0.000886228	0.00285826	400.694	319.968	473.2	590.027	622.594	668.113	814.57	THAP9	no
gene10915	1275.56	-0.756918	0.215602	-3.51071	0.000446912	0.00158914	793.531	1069.31	881.872	1306.12	1383.11	1667.46	1827.48	LIN54	no
gene10916	2825.8	-0.859888	0.222814	-3.85922	0.000113747	0.000491397	2077.55	1802.14	1904.75	2683.54	3369.39	3357.53	4585.66	COPS4	no
gene10917	43.9778	-1.39247	0.44575	-3.12388	0.00178484	0.005219	13.4687	31.9968	22.704	51.6661	91.3009	50.0883	46.6195	PLAC8	down
gene10918	12.0589	-1.1468	0.689986	-1.66207	0.0964992	0.15503	6.73435	6.19294	8.36464	24.7998	18.4544	9.69451	10.1715	LOC101118024	no
gene10921	761.287	-0.0172447	0.203884	-0.0845808	0.932595	0.951854	800.266	762.763	705.02	726.426	844.047	630.143	860.342	COQ2	no
gene10922	35.289	-0.63555	0.540271	-1.17635	0.239454	0.329126	15.7135	53.6721	10.7545	38.2329	33.995	57.3592	37.2956	HPSE	no
gene10923	335.074	-0.999775	0.237078	-4.21706	2.48e-05	0.000130546	176.216	252.878	210.311	499.095	355.491	403.13	448.395	HELQ	no
gene10924	1192.76	-1.0272	0.241848	-4.24728	2.16e-05	0.000116428	897.914	732.831	615.399	1108.76	1515.21	1572.93	1906.31	MRPS18C	down
gene10925	920.627	-0.8861	0.251174	-3.52783	0.000418975	0.00150356	576.91	805.082	477.979	990.957	931.463	1282.91	1379.09	FAM175A	no
gene10926	112.628	-0.495314	0.322235	-1.53712	0.124264	0.191445	66.2212	134.18	72.8919	152.932	112.669	131.684	117.82	GPAT3	no
gene10928	16.5831	0.308337	0.603214	0.511158	0.609241	0.692964	20.2031	15.4823	20.3141	6.19994	24.2821	18.5811	11.0192	NKX6-1	no
gene10929	4644.39	0.0333018	0.219194	0.151928	0.879243	0.912211	5389.73	3361.73	5366.51	4253.16	4461.12	4835.14	4843.34	CDS1	no
gene10930	3440.13	-0.428857	0.207307	-2.0687	0.0385739	0.071379	2197.64	3224.46	3194.1	3466.8	3873.49	3946.47	4177.95	WDFY3	no
gene10932	4957.63	-1.11231	0.351935	-3.16054	0.00157475	0.00469133	4646.7	1896.07	2395.87	3289.07	6939.84	6311.13	9224.73	LOC101110941	down
gene10933	8747.25	-2.17258	0.293658	-7.39833	1.38e-13	1.15e-11	3188.72	4003.73	1540.29	11155.8	12131.4	15987.1	13223.8	ARHGAP24	down
gene10935	124.019	-1.4462	0.435408	-3.32147	0.000895436	0.00288361	85.3018	66.058	35.8485	123.999	250.592	234.284	72.0483	MAPK10	down
gene10937	6420.51	-0.866567	0.217417	-3.98574	6.73e-05	0.000311322	3507.48	4918.22	4673.44	7121.66	6587.26	9240.48	8895	PTPN13	no
gene10940	223.694	-0.775211	0.258607	-2.99764	0.00272078	0.00745956	117.851	168.241	191.192	295.53	219.511	281.949	291.584	SLC10A6	no
gene10941	49.1342	-0.800856	0.476676	-1.68008	0.092941	0.150245	38.1613	39.2219	26.2889	39.2663	28.1673	105.024	67.8102	C6H4orf36	no
gene10944	5766.86	-0.85444	0.17751	-4.81349	1.48e-06	1.16e-05	4147.24	4084.24	3603.96	7020.4	6855.34	8033.52	6623.36	AFF1	no
gene10945	641.449	-0.95823	0.228029	-4.20223	2.64e-05	0.000138194	351.309	472.728	426.597	617.927	841.134	835.343	945.104	KLHL8	no
gene10946	184.102	0.611366	0.434352	1.40754	0.159268	0.234642	272.741	92.8941	322.636	147.765	165.119	64.6301	222.926	HSD17B13	no
gene10947	408.616	-0.511075	0.205259	-2.4899	0.012778	0.0278723	291.822	355.062	339.365	422.629	502.155	449.179	500.1	HSD17B11	no
gene10948	22.7169	-0.119229	0.577071	-0.20661	0.836314	0.879898	6.73435	24.7717	33.4586	21.6998	32.0524	25.0441	15.2573	NUDT9	no
gene10949	1415.77	-0.309165	0.200423	-1.54256	0.122937	0.189902	1159.43	1148.79	1429.16	1340.22	1725.98	1424.28	1682.54	LOC105607326	no
gene10950	3410.61	-0.925068	0.270075	-3.42522	0.000614295	0.00208753	2143.77	2149.98	2466.37	2778.61	6387.18	3786.51	4161.85	SPARCL1	no
gene10958	67.6909	0.480935	0.473895	1.01486	0.310174	0.406996	31.427	112.505	97.9858	89.8991	61.191	28.2757	52.5529	PPP2R2C	no
gene10960	395.176	1.60778	0.261582	6.14638	7.93e-10	1.88e-08	620.683	479.953	823.32	254.197	231.166	188.235	168.678	WFS1	up
gene10961	2.76366	0.616828	1.4775	0.417481	0.676327	0.751084	5.61196	0	4.77979	3.09997	0	1.61575	4.23814	LOC101112981	no
gene10962	23.8996	-0.314689	0.468643	-0.67149	0.501909	0.598093	21.3255	23.7396	17.9242	20.6665	24.2821	33.9308	25.4288	JAKMIP1	no
gene10963	4.13451	-0.0325331	1.095	-0.0297105	0.976298	0.983764	7.85675	2.06431	2.3899	1.03332	4.85643	5.65513	5.08576	LOC105607318	no
gene10964	6.44043	-1.66869	0.988412	-1.68825	0.0913626	0.148282	2.24478	6.19294	0	10.3332	10.6841	9.69451	5.93339	CRMP1	no
gene10965	637.307	0.670679	0.206137	3.25357	0.00113966	0.00354009	791.287	675.03	961.934	481.528	499.241	512.193	539.938	LOC106991242	no
gene10966	713.009	-0.390526	0.284662	-1.3719	0.170095	0.247732	388.348	750.378	677.536	966.157	550.719	913.707	744.217	LOC101113496	no
gene10967	934.413	-0.937346	0.255454	-3.66934	0.000243182	0.00094295	540.993	807.146	492.319	1128.39	895.526	1487.3	1189.22	EVC2	no
gene10969	43.3832	-2.12989	0.431694	-4.9338	8.06e-07	6.84e-06	14.5911	15.4823	14.3394	44.4329	84.5019	55.7434	74.5912	STK32B	down
gene10972	2011.68	1.2156	0.193139	6.2939	3.1e-10	8.39e-09	3412.07	2454.47	3079.38	1342.29	1214.11	1255.44	1323.99	MSX1	up
gene10974	886.836	-0.656939	0.193071	-3.40257	0.000667557	0.00224577	710.474	713.22	577.16	990.957	1008.19	1038.12	1169.73	STX18	no
gene10976	161.5	0.386168	0.269929	1.43062	0.152538	0.226581	223.356	166.177	169.683	158.098	172.889	129.26	111.039	LOC101103398	no
gene10977	431.023	-0.67486	0.250344	-2.69572	0.00702359	0.0168165	272.741	413.895	277.228	602.427	434.165	577.631	439.071	ZBTB49	no
gene10978	694.79	0.228327	0.195202	1.1697	0.242123	0.332016	879.956	702.898	691.875	630.327	633.278	630.143	695.054	LYAR	no
gene10979	727.528	-0.265576	0.204028	-1.30167	0.193031	0.274817	709.352	535.689	712.189	707.826	778.971	791.718	856.951	TMEM128	no
gene10980	15.2374	0.42324	0.699088	0.605418	0.544901	0.636941	29.1822	4.12862	20.3141	8.26658	15.5406	8.88663	20.3431	OTOP1	no
gene10981	10.9912	1.20314	0.677518	1.7758	0.0757654	0.126559	20.2031	8.25725	20.3141	7.23326	6.799	5.65513	8.47627	DRD5	no
gene10982	14.1126	-1.33436	0.72382	-1.8435	0.0652566	0.11188	4.48957	14.4502	3.58485	14.4665	8.74157	24.2363	28.8193	SLC2A9	no
gene10986	2880.79	1.46361	0.257966	5.67368	1.4e-08	2.13e-07	4529.98	3920.13	5143.06	1727.72	2061.07	999.342	1784.26	WDR1	up
gene10987	429.154	0.255276	0.215247	1.18597	0.235635	0.324739	379.369	491.306	548.481	404.029	365.204	407.977	407.709	ZNF518B	no
gene10988	44.0332	-2.02849	0.397384	-5.10459	3.32e-07	3.18e-06	14.5911	16.5145	16.7293	76.4659	57.3059	62.2064	64.4197	CLNK	down
gene10992	178.807	-1.145	0.290406	-3.94275	8.06e-05	0.000364206	88.669	131.084	96.7908	239.731	299.156	233.476	162.744	HS3ST1	down
gene10996	2105	-0.772528	0.202384	-3.81714	0.000135006	0.0005689	1515.23	1551.33	1429.16	2138.98	2493.29	2429.28	3177.75	RAB28	no
gene10997	1.96379	0.373311	1.72633	0.216246	0.828796	0.874087	2.24478	2.06431	2.3899	6.19994	0	0	0.847627	NKX3-2	no
gene10998	2831.94	0.252534	0.170443	1.48163	0.13844	0.209197	3377.28	2925.13	3051.9	2638.07	2572.94	2746.78	2511.52	BOD1L1	no
gene11	1611.37	1.1012	0.235523	4.67557	2.93e-06	2.08e-05	3077.6	1935.29	1942.99	1108.76	1265.59	933.096	1016.3	STK25	up
gene110	908.728	-0.217544	0.298526	-0.728725	0.46617	0.564835	680.17	1039.38	774.327	1321.62	677.958	1216.66	650.978	ATG16L1	no
gene11000	5445.61	-0.634394	0.203106	-3.12346	0.0017874	0.0052256	3535.54	4086.31	4796.52	6182.37	5448.91	6583.38	7486.24	CPEB2	no
gene11001	1340.61	-1.99711	0.245344	-8.14001	3.95e-16	7.43e-14	484.874	623.422	375.214	1676.05	2545.74	1872.66	1806.29	C1QTNF7	down
gene11002	1457.12	-1.09617	0.234539	-4.67373	2.96e-06	2.1e-05	831.693	1157.05	659.612	1845.51	1716.26	2188.54	1801.21	CC2D2A	down
gene11005	4836.77	-0.815816	0.180113	-4.52948	5.91e-06	3.8e-05	3086.58	3604.29	3424.72	6098.67	5141.99	6315.16	6185.98	FBXL5	no
gene11007	124.169	0.067897	0.317647	0.21375	0.830742	0.875381	114.484	84.6368	184.022	112.632	104.899	124.413	144.097	BST1	no
gene11010	2597.64	0.454423	0.405648	1.12024	0.262612	0.355837	5771.34	1047.64	2397.07	1699.82	2712.8	2108.56	2446.25	LOC101106941	no
gene11011	264.983	-0.0848739	0.3531	-0.240368	0.810045	0.858811	203.153	390.155	174.462	226.298	426.395	249.634	184.783	PROM1	no
gene11012	1503.6	-0.177999	0.21112	-0.843121	0.399161	0.498659	1463.6	1534.82	1197.34	1735.98	1234.5	1605.25	1753.74	TAPT1	no
gene11014	1511.82	-1.66617	0.310602	-5.36431	8.13e-08	9.62e-07	636.397	1018.74	366.849	2106.95	2661.32	2148.95	1643.55	LDB2	down
gene11018	925.472	0.436556	0.28336	1.54064	0.123405	0.190384	1497.27	644.065	1122.06	923.791	751.775	653.571	885.77	QDPR	no
gene11023	560.822	-1.30734	0.27253	-4.79706	1.61e-06	1.24e-05	363.655	354.03	194.777	920.691	576.944	773.137	742.521	LOC101117587	down
gene11024	57.4104	-0.555228	0.404591	-1.37232	0.169964	0.247604	56.1196	49.5435	29.8737	96.099	48.5643	76.7482	44.9242	MAN2B2	no
gene11025	2127.71	1.10594	0.293231	3.77156	0.000162233	0.000667352	2530.99	2916.87	3748.55	1747.35	1393.8	759.403	1796.97	LOC101108390	up
gene11026	141.936	1.25595	0.278339	4.51231	6.41e-06	4.07e-05	182.95	201.27	253.329	84.7325	99.0712	66.2458	105.953	BLOC1S4	up
gene11028	1697.31	-0.391673	0.251657	-1.55638	0.119618	0.185598	1055.05	1716.48	1549.85	2327.04	1594.85	2156.22	1481.65	KIAA0232	no
gene11029	2809.94	0.338273	0.198649	1.70287	0.0885933	0.144556	3201.06	3027.31	3344.66	3074.14	2100.89	2545.62	2375.9	TBC1D14	no
gene11030	1169.8	0.991217	0.250188	3.96189	7.44e-05	0.00033944	1960.82	1383.09	1557.02	882.458	848.904	549.355	1006.98	GRPEL1	no
gene11031	4268.82	1.10124	0.315031	3.49568	0.000472864	0.00166893	9403.4	3146.01	5879.15	2827.17	3536.45	2316.99	2772.59	SORCS2	up
gene11034	692.866	-0.618581	0.242214	-2.55386	0.0106535	0.0238792	414.163	659.548	517.413	993.023	768.287	846.654	650.978	AFAP1	no
gene11035	146.975	0.145204	0.336371	0.431678	0.665975	0.741949	219.989	149.663	96.7908	157.065	98.0999	181.772	125.449	ABLIM2	no
gene11036	252.626	0.108247	0.313234	0.345577	0.72966	0.794473	212.132	374.673	203.141	333.763	194.257	269.023	181.392	SH3TC1	no
gene11037	659.491	1.43413	0.696202	2.05993	0.039405	0.0727123	1211.06	521.239	1358.66	407.129	768.287	155.112	194.954	HTRA3	no
gene11038	1556.58	0.291955	0.240514	1.21388	0.224793	0.312238	2125.81	1543.07	1546.26	1838.28	1476.35	1281.29	1084.96	ACOX3	no
gene11042	523.779	0.0150998	0.283093	0.0533387	0.957462	0.970228	694.761	559.429	326.221	626.194	410.854	576.015	472.976	TRMT44	no
gene11043	664.985	2.47466	1.22501	2.02012	0.0433712	0.0789658	846.284	276.618	2631.28	232.498	602.197	36.3544	29.6669	CPZ	no
gene11045	12.6927	1.77214	0.730702	2.42526	0.0152974	0.0324508	24.6926	9.28941	29.8737	4.13329	11.6554	2.42363	6.78102	ADRA2C	no
gene11048	1220.07	0.814621	0.198722	4.09931	4.14e-05	0.000204623	1846.34	1509.01	1502.05	993.023	966.429	766.674	956.971	LRPAP1	no
gene11051	64.155	0.919912	0.458233	2.00752	0.0446944	0.0809784	152.645	46.447	64.5272	42.3662	45.6504	69.4773	27.9717	HGFAC	no
gene11053	184.217	0.125358	0.277901	0.451089	0.651925	0.729644	169.481	216.753	193.582	239.731	154.434	185.004	130.535	RGS12	no
gene11054	58.3309	0.487694	0.40578	1.20187	0.229415	0.317651	98.7705	43.3506	66.9171	66.1327	61.191	36.3544	35.6003	MSANTD1	no
gene11055	2349.73	0.864473	0.280321	3.08387	0.00204329	0.00586159	2656.7	3766.34	3071.02	2589.51	1407.39	1796.72	1160.4	HTT	no
gene11056	989.772	0.255163	0.243781	1.04669	0.295244	0.391127	1047.19	1328.39	896.211	1185.22	761.488	959.756	750.15	GRK4	no
gene11057	789.325	0.842459	0.187252	4.49906	6.83e-06	4.3e-05	1154.94	935.134	1079.04	606.561	564.317	613.986	571.301	NOP14	no
gene11058	327.858	1.38828	0.279208	4.97221	6.62e-07	5.78e-06	456.814	520.207	542.507	262.464	231.166	146.226	135.62	MFSD10	up
gene11059	1970.58	0.708657	0.239149	2.96325	0.00304414	0.00821979	3270.65	2192.3	2132.98	1794.88	1721.12	1494.57	1187.53	LOC106991221	no
gene11060	1938.45	0.235979	0.27095	0.870931	0.383792	0.483237	1543.29	2720.76	2099.52	2338.41	1568.63	2024.54	1273.98	ADD1	no
gene11062	397.933	0.110235	0.310249	0.35531	0.722357	0.788529	494.975	484.081	266.474	444.329	493.413	370.007	232.25	SH3BP2	no
gene11063	1268.22	0.463905	0.271349	1.70962	0.087336	0.142763	1487.17	1625.65	1400.48	1578.92	943.119	1147.99	694.207	FAM193A	no
gene11064	3100.41	-0.265811	0.243275	-1.09264	0.274554	0.368746	2573.65	3280.19	2483.1	4318.26	2480.66	3763.09	2803.95	RNF4	no
gene11065	52.22	-0.500764	0.586572	-0.853713	0.393264	0.49266	52.7524	30.9647	43.0181	85.7658	21.3683	114.718	16.9525	CFAP99	no
gene11068	206.504	-0.443181	0.253163	-1.75057	0.0800196	0.132472	170.604	213.656	129.054	233.531	258.362	215.703	224.621	POLN	no
gene11071	1097.66	0.489864	0.294165	1.66527	0.0958585	0.154189	1324.42	1640.1	976.273	1362.95	701.268	1026.81	651.825	NELFA	no
gene11072	1560.33	0.393959	0.291277	1.35253	0.176207	0.254984	1655.53	2235.65	1529.53	2031.51	905.238	1518	1046.82	WHSC1	no
gene11073	2662.18	1.29308	0.233101	5.54729	2.9e-08	3.97e-07	4700.58	3414.37	3952.89	2198.91	1578.34	1433.98	1356.2	LETM1	up
gene11074	2603.64	1.01715	0.20443	4.97556	6.51e-07	5.7e-06	3740.93	3815.88	3429.5	2306.38	1665.76	1597.17	1669.83	FGFR3	up
gene11075	21.2497	0.369905	0.507252	0.729233	0.465859	0.564537	35.9166	21.6753	15.5343	20.6665	18.4544	16.1575	20.3431	LOC106991222	no
gene11076	149.212	1.3814	0.294877	4.68466	2.8e-06	2.01e-05	321.004	193.013	176.852	78.5325	101.014	79.9797	94.0866	LOC101104153	up
gene11077	22.5817	1.15529	0.478294	2.41544	0.0157162	0.0331895	41.5285	30.9647	26.2889	16.5332	15.5406	15.3496	11.8668	LOC106991247	no
gene11078	188.221	2.18806	0.282775	7.73779	1.01e-14	1.18e-12	319.882	336.483	362.069	110.566	65.0762	57.3592	66.1149	LOC106990166	up
gene11079	839.266	1.40955	0.243751	5.78276	7.35e-09	1.22e-07	1649.92	1067.25	1193.75	565.228	566.26	377.278	455.176	TMEM129	up
gene11080	1370.09	0.691416	0.208285	3.31956	0.000901589	0.00289851	1864.29	1592.62	1796.01	1117.02	1210.22	828.88	1181.59	SLBP	no
gene11081	626.738	1.00116	0.211619	4.73095	2.23e-06	1.64e-05	911.383	853.593	867.533	509.428	444.849	340.116	460.262	CTBP1	up
gene11082	369.745	1.92097	0.381432	5.03622	4.75e-07	4.35e-06	673.435	494.403	745.648	176.698	307.898	80.7876	109.344	SPON2	up
gene11086	50.1831	1.11024	0.370857	2.99372	0.00275603	0.00753476	81.9346	61.9294	72.8919	46.4995	35.9376	26.6599	25.4288	FGFRL1	up
gene11087	339.449	1.71861	0.288076	5.9658	2.43e-09	4.8e-08	644.253	457.245	589.11	169.465	224.367	100.984	190.716	IDUA	up
gene11089	577.856	1.12239	0.282053	3.97937	6.91e-05	0.000318656	1176.27	693.609	638.103	470.162	444.849	330.421	291.584	DGKQ	up
gene11090	250.051	1.16673	0.362762	3.21623	0.00129885	0.0039626	328.861	552.204	216.286	250.064	153.463	149.457	100.02	TMEM175	up
gene11091	2005.56	1.39645	0.239084	5.84084	5.19e-09	9.21e-08	3335.75	3240.97	2741.21	1651.25	1102.41	1033.27	934.085	GAK	up
gene11092	5.95756	0.64391	0.934593	0.688974	0.49084	0.587606	4.48957	14.4502	3.58485	3.09997	2.91386	8.07876	5.08576	CPLX1	no
gene11094	212.045	1.15434	0.267134	4.32121	1.55e-05	8.77e-05	280.598	306.55	340.56	184.965	135.98	137.339	98.3247	UVSSA	up
gene11095	1493.23	0.449277	0.202219	2.22173	0.0263014	0.0513582	1808.17	1826.92	1652.61	1595.45	1175.26	1282.1	1112.09	MAEA	no
gene11096	8.50135	-2.57455	0.95082	-2.70772	0.0067747	0.0163102	3.36718	2.06431	1.19495	10.3332	16.5119	4.84725	21.1907	LOC101108322	no
gene11097	19.5934	2.0301	0.762939	2.66089	0.00779344	0.0183312	62.854	10.3216	29.8737	17.5665	10.6841	1.61575	4.23814	LOC105601929	no
gene11098	114.534	0.984467	0.292867	3.36148	0.000775265	0.0025509	117.851	167.209	193.582	96.099	84.5019	67.0537	75.4388	PCGF3	no
gene11099	166.034	1.08147	0.272489	3.96886	7.22e-05	0.000330989	274.986	203.335	234.21	146.732	110.727	106.64	85.6103	MFSD7	up
gene111	81.0669	-0.708677	0.365346	-1.93974	0.0524109	0.0927291	37.039	81.5403	59.7474	117.799	66.0474	117.142	88.1532	LOC105616381	no
gene11100	1931.46	-0.660876	0.409265	-1.61479	0.106357	0.168289	2599.46	702.898	1047.97	1157.32	2688.52	1927.59	3396.44	ATP5I	no
gene11101	34.6055	0.902623	0.432217	2.08836	0.0367658	0.0684182	47.1405	55.7364	38.2384	26.8664	33.995	25.852	14.4097	PDE6B	no
gene11104	854.943	-0.0852468	0.230602	-0.36967	0.711628	0.779554	805.878	906.233	765.962	1141.82	757.603	912.9	694.207	PIGG	no
gene11107	6160.45	-1.73512	0.25848	-6.71277	1.91e-11	7.61e-10	2357.02	3817.95	1752.99	8382.32	8757.11	9430.33	8625.45	MCC	down
gene11109	1691.1	-0.296923	0.214301	-1.38554	0.165886	0.242657	1166.17	1464.63	1856.95	1869.28	1655.07	1854.88	1970.73	DCP2	no
gene1111	4.01418	0.205141	1.17735	0.17424	0.861677	0.898511	7.85675	5.16078	0	4.13329	1.94257	6.46301	2.54288	LOC105615520	no
gene11111	5569.85	0.607371	0.21969	2.76467	0.00569809	0.0140481	6257.34	5800.72	8733.88	5211.05	4591.27	3742.08	4652.63	REEP5	no
gene11112	1249.21	-0.228645	0.20141	-1.13522	0.256284	0.348423	1356.97	956.809	1099.35	1202.79	1361.74	1340.27	1426.56	SRP19	no
gene11113	2247.53	-0.174231	0.189871	-0.917632	0.358812	0.457204	1785.73	2038.51	2458.01	2291.91	2287.38	2397.78	2473.38	APC	no
gene11117	2082.6	-1.08107	0.261787	-4.12959	3.63e-05	0.000182543	1332.28	1677.25	805.395	2441.74	2418.5	3270.28	2632.73	EPB41L4A	down
gene11120	1211.36	-0.735275	0.24336	-3.02135	0.00251652	0.00698352	855.263	830.886	947.594	1154.22	2068.84	1253.82	1368.92	NREP	no
gene11121	2050.76	-0.791955	0.205763	-3.84886	0.000118667	0.00050998	1184.12	1597.78	1557.02	2557.47	2086.32	2577.12	2795.47	YTHDC2	no
gene11122	317.872	-1.72309	0.365396	-4.71568	2.41e-06	1.76e-05	87.5466	218.817	105.155	249.031	500.212	436.253	628.092	KCNN2	down
gene11124	353.578	0.0690755	0.210263	0.32852	0.742519	0.805243	340.085	360.223	389.553	364.763	323.438	305.377	391.604	TRIM36	no
gene11126	928.254	-0.432935	0.193688	-2.23522	0.025403	0.0498556	714.964	757.603	848.413	946.524	1067.44	971.067	1191.76	PGGT1B	no
gene11127	803.567	-0.903851	0.263819	-3.42603	0.000612473	0.00208217	710.474	434.538	464.835	724.359	1082.01	950.87	1257.88	CCDC112	no
gene1113	24.5757	-0.826551	0.50023	-1.65234	0.0984645	0.157565	25.815	14.4502	10.7545	39.2663	26.2247	25.852	29.6669	LOC101119949	no
gene11132	2026.28	0.21035	0.219047	0.960299	0.336905	0.434569	1729.61	2004.45	2855.93	1946.78	1967.83	1778.13	1901.23	FEM1C	no
gene11136	436.806	-0.0988206	0.243489	-0.405852	0.684852	0.758237	310.903	512.982	434.961	538.361	443.878	390.204	426.356	LOC105601870	no
gene11137	4035.2	0.285516	0.245292	1.16399	0.24443	0.334674	4490.69	3446.37	5552.93	3576.33	3738.48	2750.82	4690.77	TMED7	no
gene11138	830.664	0.687248	0.320486	2.14439	0.0320013	0.0608295	1507.37	655.419	1018.1	462.929	979.056	550.971	640.806	CDO1	no
gene11139	1242.78	-0.143924	0.204928	-0.702317	0.482481	0.579913	1163.92	1099.25	1254.7	1312.32	1062.59	1236.86	1569.81	ATG12	no
gene11141	1683.52	-0.826251	0.220918	-3.74008	0.000183959	0.000742436	1324.42	1041.45	1137.59	1627.48	2092.15	1955.06	2606.45	AP3S1	no
gene11142	281.927	-0.675231	0.264769	-2.55027	0.010764	0.0240827	185.195	196.11	249.744	244.898	419.596	382.125	295.822	LVRN	no
gene11143	126.841	-2.39227	0.421012	-5.68219	1.33e-08	2.04e-07	23.5702	62.9615	23.899	218.031	258.362	203.585	97.4771	ARL14EPL	down
gene11144	1558.22	0.429643	0.227462	1.88886	0.0589107	0.102521	1820.52	1574.04	2086.38	1780.42	1329.69	1172.23	1144.3	KIAA1191	no
gene11145	227.825	-1.14552	0.301159	-3.80371	0.000142546	0.000595681	129.075	194.045	80.0616	294.497	261.276	342.539	293.279	SIMC1	down
gene11146	191.422	-1.4745	0.269709	-5.46699	4.58e-08	5.88e-07	88.669	113.537	82.4515	196.331	261.276	307.801	289.888	LOC106990212	down
gene11148	354.391	0.387491	0.242884	1.59538	0.110628	0.173905	484.874	366.415	377.604	264.531	295.271	285.18	406.861	THOC3	no
gene11150	5.62577	1.31067	0.952339	1.37627	0.168738	0.246008	4.48957	10.3216	10.7545	3.09997	5.82772	4.03938	0.847627	HRH2	no
gene11151	3376.08	-0.529635	0.254831	-2.07838	0.0376744	0.0699643	1950.72	3660.03	2468.76	4414.36	4206.64	3975.56	2956.52	SFXN1	no
gene11152	12.6526	-0.0177821	0.921408	-0.0192989	0.984603	0.989634	1.12239	18.5788	17.9242	20.6665	11.6554	17.7733	0.847627	DRD1	no
gene11157	1176.14	-0.9697	0.219214	-4.42354	9.71e-06	5.85e-05	652.11	794.76	832.879	1828.98	1216.05	1567.28	1340.95	GCNT4	no
gene11159	583.95	-1.68988	0.252857	-6.68313	2.34e-11	8.92e-10	292.944	305.518	172.073	716.093	756.632	896.742	947.647	ANKRD31	down
gene11160	12501.3	0.743849	0.299738	2.48167	0.013077	0.0284066	19931.4	8005.4	20782.5	10028.4	9919.74	7934.96	10906.4	HMGCR	no
gene11161	3582.81	-0.468469	0.198552	-2.35943	0.0183031	0.0378136	3088.82	2436.92	3290.89	3564.96	3864.75	4301.94	4531.41	COL4A3BP	no
gene11162	582.174	-1.08543	0.254201	-4.26998	1.95e-05	0.000106741	236.825	436.602	390.748	644.794	728.464	754.556	883.227	POLK	down
gene11163	11.5108	-1.78181	0.708656	-2.51435	0.0119251	0.0263087	6.73435	4.12862	3.58485	15.4998	13.598	22.6205	14.4097	ANKDD1B	no
gene11166	427.539	-0.391571	0.209299	-1.87087	0.0613631	0.106044	344.574	396.348	347.73	450.529	430.28	460.489	562.824	POC5	no
gene11167	11.1304	-0.35475	0.711981	-0.498257	0.618303	0.70094	16.8359	7.22509	4.77979	8.26658	11.6554	10.5024	18.6478	SV2C	no
gene11168	1371.18	-0.181655	0.197334	-0.920544	0.357289	0.455524	1289.63	1364.51	1166.27	1312.32	1643.42	1576.97	1245.16	IQGAP2	no
gene11170	1505.23	0.847321	0.231353	3.66246	0.000249805	0.000964399	1636.45	1904.33	2510.59	1274.09	1229.65	866.043	1115.48	F2R	no
gene11172	1388.51	0.875156	0.235869	3.71034	0.000206981	0.000817786	1588.19	1608.1	2431.72	1179.02	1092.7	809.491	1010.37	F2RL1	no
gene11173	11.9555	-0.370434	0.681938	-0.543208	0.586986	0.673882	8.97914	13.418	8.36464	11.3666	5.82772	14.5418	21.1907	S100Z	no
gene11175	13.707	-1.71939	0.712024	-2.4148	0.0157439	0.0332275	11.2239	4.12862	2.3899	29.9664	12.6267	16.9654	18.6478	CRHBP	no
gene11176	145.352	-0.450807	0.352188	-1.28002	0.200538	0.283733	76.3227	104.248	180.437	127.099	135.98	153.496	239.878	LOC101106776	no
gene11177	2354.82	-0.25994	0.196606	-1.32214	0.186121	0.266951	2288.56	1773.24	2287.13	2422.11	2256.3	2579.55	2876.85	AGGF1	no
gene11178	142.18	-0.430772	0.277301	-1.55344	0.120317	0.186496	96.5257	144.502	114.715	121.932	183.573	171.27	162.744	ZBED3	no
gene11179	1019.81	-1.53862	0.294766	-5.21981	1.79e-07	1.9e-06	372.634	747.281	344.145	1586.15	1061.62	1636.76	1390.11	PDE8B	down
gene11181	1096.45	-0.505465	0.199363	-2.5354	0.0112319	0.0249904	893.424	996.031	763.572	1195.55	1124.75	1265.94	1435.88	WDR41	no
gene11184	2778.2	-0.880924	0.31651	-2.78324	0.00538186	0.0133998	2843.02	1349.03	1436.33	2148.28	3806.47	3204.04	4660.25	TBCA	no
gene11186	3426.68	-0.823841	0.183765	-4.48312	7.36e-06	4.59e-05	2231.32	2624.77	2282.35	3692.06	4472.77	4091.89	4591.6	AP3B1	no
gene11188	1453.38	-0.672074	0.234535	-2.86555	0.00416282	0.0107369	1041.58	880.429	1334.76	1404.29	1848.36	1534.16	2130.09	SCAMP1	no
gene11190	35.8404	0.0483244	0.450726	0.107215	0.914619	0.938423	20.2031	46.447	43.0181	36.1663	25.2534	49.2804	30.5146	LHFPL2	no
gene11193	844.564	0.705485	0.285935	2.46729	0.013614	0.0294013	668.946	1458.44	1124.45	764.659	799.368	514.617	581.472	ARSB	no
gene11194	22.654	-1.24744	0.588827	-2.11851	0.0341319	0.064258	14.5911	19.611	3.58485	27.8997	42.7366	31.5072	18.6478	DMGDH	no
gene11197	15.9643	-0.278475	0.7254	-0.383892	0.701058	0.771038	21.3255	8.25725	13.1444	29.9664	2.91386	23.4284	12.7144	BHMT	no
gene11198	5196.89	0.220226	0.212143	1.0381	0.299221	0.395294	4588.34	5180.39	7194.79	4715.05	4443.63	4983.79	5272.24	JMY	no
gene11201	1057.92	-0.759957	0.213016	-3.5676	0.000360268	0.00132429	615.071	852.561	805.395	1373.29	1095.61	1458.22	1205.33	HOMER1	no
gene11202	2592.32	-1.08655	0.208549	-5.21006	1.89e-07	1.98e-06	1587.06	1710.28	1438.72	2567.81	3340.25	3622.51	3879.59	PAPD4	down
gene11203	889.63	-0.82393	0.231058	-3.5659	0.000362612	0.00133004	593.746	681.223	578.355	853.525	1153.89	1410.55	956.123	CMYA5	no
gene11204	549.71	-0.625434	0.220685	-2.83406	0.00459601	0.0116935	405.184	499.564	353.705	658.227	541.978	653.571	735.74	MTX3	no
gene11205	468.724	1.54189	0.300217	5.13592	2.81e-07	2.78e-06	1028.11	663.676	558.041	271.764	361.318	176.925	221.231	THBS4	up
gene11206	4748.35	0.0349351	0.176233	0.198232	0.842864	0.88428	4515.38	4523.94	5403.56	4847.32	4339.71	4722.84	4885.72	SERINC5	no
gene11207	557.002	-0.610016	0.220354	-2.76835	0.00563408	0.0139063	374.879	458.277	451.691	533.195	682.814	611.562	786.598	GNPNAT1	no
gene11208	1565.51	-0.888403	0.224929	-3.94971	7.82e-05	0.000355101	941.687	1133.31	1085.01	1525.18	1841.56	1885.58	2546.27	STYX	no
gene11210	4830.31	-0.943766	0.237509	-3.9736	7.08e-05	0.000325343	3543.39	2964.35	2977.81	4764.65	5312.93	5762.58	8486.44	PSMC6	no
gene11211	1173.33	-0.134568	0.237028	-0.56773	0.570218	0.659457	847.406	1054.86	1431.55	1483.85	1080.07	1157.69	1157.86	ERO1A	no
gene11212	389.876	-2.37628	0.305804	-7.77059	7.81e-15	9.47e-13	139.177	149.663	54.9676	550.761	570.145	642.261	622.158	GPR137C	down
gene11213	410.84	-1.17918	0.305424	-3.86079	0.000113019	0.000488901	143.666	354.03	217.481	492.895	431.251	571.168	665.387	TXNDC16	down
gene11214	261.017	-0.308322	0.407381	-0.75684	0.449146	0.548952	90.9138	250.814	347.73	328.597	140.836	338.5	329.727	PTGER2	no
gene11215	25.1216	-4.03988	0.822111	-4.91403	8.92e-07	7.49e-06	0	5.16078	2.3899	44.4329	19.4257	82.4033	22.0383	ANKDD1A	down
gene11216	816.94	-0.054393	0.218902	-0.24848	0.803763	0.853792	858.63	645.098	895.016	770.859	775.086	761.827	1012.07	SPG21	no
gene11217	927.422	-1.13416	0.231577	-4.89755	9.7e-07	8.04e-06	576.91	623.422	452.886	1139.76	922.722	1441.25	1335.01	MTFMT	down
gene11218	99.4056	1.07883	0.385498	2.79854	0.00513339	0.0128579	62.854	154.823	209.116	54.7661	69.9326	63.8222	80.5246	SLC51B	no
gene11219	658.638	1.42703	0.271068	5.26446	1.41e-07	1.55e-06	1133.62	1233.43	714.579	348.23	515.753	372.431	292.431	RASL12	up
gene11221	5.41479	-0.936066	1.08864	-0.859847	0.389873	0.489452	3.36718	7.22509	0	7.23326	2.91386	12.926	4.23814	UBAP1L	no
gene11222	712.404	0.0990382	0.204005	0.48547	0.627343	0.708979	844.039	735.927	641.687	628.26	660.474	794.95	681.492	PDCD7	no
gene11224	3287.78	-0.454837	0.219875	-2.06862	0.0385822	0.0713866	2386.21	2445.18	3308.81	3394.47	3202.33	3643.52	4633.98	CLPX	no
gene11225	540.106	1.5009	0.309238	4.85352	1.21e-06	9.7e-06	526.402	686.384	1357.46	263.497	355.491	295.683	295.822	CILP	up
gene11226	627.007	0.740778	0.214691	3.45043	0.00055969	0.0019272	723.943	789.6	927.28	598.294	459.418	454.834	435.68	PARP16	no
gene11227	168.988	-0.734136	0.331996	-2.21128	0.0270166	0.0525638	175.093	113.537	78.8666	245.931	143.75	253.673	172.068	IGDCC3	no
gene11228	228.295	0.321418	0.264819	1.21373	0.224852	0.312295	221.111	261.136	290.373	236.631	259.333	159.959	169.525	IGDCC4	no
gene11229	2429.5	-0.64981	0.211698	-3.06951	0.00214408	0.00610962	1392.89	1966.26	2141.35	2881.94	2549.63	3094.16	2980.26	DPP8	no
gene11230	2771.94	0.0856434	0.173367	0.494	0.621306	0.703365	2850.88	2592.78	3155.86	2649.44	2644.81	2768.59	2741.23	HACD3	no
gene11231	433.86	-0.00996045	0.229058	-0.0434844	0.965315	0.976065	362.533	482.017	451.691	461.895	407.94	353.042	517.9	VWA9	no
gene11232	176.966	-1.38306	0.29519	-4.68531	2.8e-06	2e-05	98.7705	117.666	59.7474	266.597	183.573	266.599	245.812	SLC24A1	down
gene11233	1049.96	-0.604723	0.279642	-2.16249	0.0305805	0.0585716	480.384	925.844	1021.68	963.057	1149.03	1347.54	1462.16	DENND4A	no
gene11236	5641.07	0.526225	0.22508	2.33795	0.0193897	0.039751	7237.19	5540.61	7726.54	4859.72	4653.43	3628.98	5841	RAB11A	no
gene11238	364.962	-0.518313	0.236834	-2.18851	0.0286326	0.0552865	249.171	372.608	255.719	468.095	368.117	444.332	396.69	MEGF11	no
gene11239	944.863	0.486223	0.203334	2.39125	0.0167911	0.035114	975.359	1115.76	1297.71	876.258	687.67	862.811	798.465	DIS3L	no
gene1124	24.3416	-1.30841	0.582259	-2.24712	0.0246323	0.0485783	8.97914	9.28941	21.5091	48.5662	14.5693	41.2017	26.2764	LOC101120207	no
gene11240	719.214	-0.558526	0.181886	-3.07075	0.0021352	0.0060904	555.584	579.04	564.016	862.825	823.65	880.585	768.798	TIPIN	no
gene11241	727.14	-0.502505	0.237208	-2.11842	0.0341398	0.0642633	426.509	755.538	579.55	870.058	747.89	914.515	795.922	MAP2K1	no
gene11242	372.176	-0.226344	0.232674	-0.972795	0.330655	0.428154	316.515	413.895	286.788	464.995	336.065	388.588	398.385	SNAPC5	no
gene11243	87890.4	-0.152639	0.250473	-0.609403	0.542258	0.634675	109382	61848.9	76634.4	77427.9	83592.8	86387	119960	RPL4	no
gene11244	527.431	-0.956242	0.288781	-3.31131	0.00092861	0.0029703	234.58	519.175	274.838	781.192	561.403	667.305	653.521	ZWILCH	no
gene11245	32.9784	-0.673159	0.470197	-1.43165	0.152244	0.226262	41.5285	14.4502	17.9242	37.1996	44.6792	42.0095	33.0575	LCTL	no
gene11246	1850.37	-0.204423	0.210434	-0.971435	0.331332	0.428784	1801.44	1955.94	1349.1	2103.85	1714.32	2187.73	1840.2	SMAD6	no
gene11248	1141.42	0.0807227	0.213726	0.377693	0.705659	0.774703	995.562	1432.63	1105.33	1284.42	1082.01	1124.56	965.447	SMAD3	no
gene11249	565.701	0.048592	0.186454	0.260612	0.794392	0.846151	563.441	559.429	607.034	552.828	570.145	516.233	590.796	AAGAB	no
gene1125	145.716	-0.44673	0.284597	-1.5697	0.116486	0.181512	87.5466	139.341	135.029	152.932	203.97	166.422	134.773	FCGR1A	no
gene11251	25.4402	-0.431499	0.486227	-0.887444	0.37484	0.47392	33.6718	14.4502	15.5343	29.9664	29.1386	29.8914	25.4288	IQCH	no
gene11253	98.9271	-0.0490556	0.338511	-0.144916	0.884777	0.915896	129.075	81.5403	80.0616	145.699	89.3583	73.5167	93.239	C7H15orf61	no
gene11254	1887.97	-1.10703	0.219999	-5.03197	4.85e-07	4.43e-06	1203.2	1340.77	868.728	2165.84	2499.12	2863.92	2274.18	MAP2K5	down
gene11258	4292.04	-0.960473	0.196367	-4.8912	1e-06	8.26e-06	2809.35	2972.61	2576.31	4362.69	5339.16	5780.35	6203.78	PIAS1	no
gene11259	350.314	-0.255038	0.236025	-1.08055	0.279896	0.374538	395.082	286.939	264.084	415.396	397.256	377.278	316.165	CALML4	no
gene1126	174.652	-0.121619	0.315306	-0.385716	0.699707	0.770003	196.419	87.7333	215.091	188.065	196.2	172.078	166.983	LOC101120455	no
gene11260	158.89	0.650643	0.268518	2.42309	0.0153891	0.0326251	214.377	199.206	187.607	149.832	124.325	147.033	89.8485	CLN6	no
gene11262	4879.95	-0.175962	0.216278	-0.813595	0.415877	0.515976	4330.19	3872.65	5427.46	4963.05	4149.33	5231.8	6185.14	FEM1B	no
gene11263	538.349	-0.184207	0.260196	-0.707954	0.478974	0.57659	384.981	650.258	462.445	742.959	542.949	518.656	466.195	ITGA11	no
gene11264	735.215	-0.438615	0.238117	-1.84201	0.0654732	0.112145	578.032	772.053	482.759	859.725	847.933	952.485	653.521	CORO2B	no
gene11266	882.256	-0.557311	0.201813	-2.76153	0.00575319	0.0141696	819.346	696.705	568.796	978.557	1002.37	1062.36	1047.67	ANP32A	no
gene11267	33.2968	-1.10403	0.434417	-2.54141	0.0110406	0.0246274	17.9583	28.9004	13.1444	45.4662	40.794	44.4332	42.3814	LOC101106331	no
gene11269	292.483	0.717506	0.293083	2.44813	0.0143599	0.0307789	228.968	349.901	552.066	221.131	228.252	240.747	226.316	NOX5	no
gene1127	9.48521	-0.792841	0.746066	-1.0627	0.28792	0.382997	11.2239	4.12862	4.77979	7.23326	11.6554	12.1181	15.2573	LOC101120877	no
gene11271	2028.5	-0.554344	0.190798	-2.9054	0.0036679	0.00962275	1610.63	1564.75	1625.13	1983.98	2733.2	2232.16	2449.64	GLCE	no
gene11272	1028.19	0.0651469	0.258329	0.252186	0.800897	0.851488	785.675	1336.64	1042	1026.09	929.521	1311.18	766.255	PAQR5	no
gene11273	806.438	-0.665973	0.221483	-3.00688	0.00263948	0.00726345	592.623	702.898	516.218	970.29	744.976	1071.24	1046.82	KIF23	no
gene11275	47341.8	0.733112	0.279563	2.62235	0.00873251	0.020171	83959.4	42879.9	57049.2	28757.4	43295.1	28389.6	47062	RPLP1	no
gene11280	3676.8	0.795186	0.196667	4.0433	5.27e-05	0.000251808	5268.51	4563.16	4722.44	3412.03	2451.53	2768.59	2551.36	TLE3	no
gene11282	8027.32	-0.334372	0.194023	-1.72336	0.0848234	0.139362	6883.63	5848.2	8227.22	8074.39	8516.23	9049.82	9591.75	UACA	no
gene11283	283.696	0.836688	0.261097	3.20451	0.0013529	0.00410698	351.309	331.322	454.08	212.865	278.759	158.344	199.192	LARP6	no
gene11285	3.04937	1.97219	1.31536	1.49936	0.133781	0.20344	6.73435	2.06431	7.16969	0	2.91386	1.61575	0.847627	THAP10	no
gene11286	156.929	-0.823341	0.282403	-2.91548	0.0035514	0.00936741	116.729	88.7654	121.885	144.665	219.511	170.462	236.488	LRRC49	no
gene11287	4145.87	-2.08531	0.29803	-6.99698	2.62e-12	1.42e-10	1638.69	1956.97	762.377	5291.65	5131.3	7270.07	6970.04	THSD4	down
gene11289	16.8722	-0.172813	0.604838	-0.285718	0.775094	0.831083	16.8359	20.6431	9.55959	26.8664	9.71286	22.6205	11.8668	NR2E3	no
gene11290	3417.35	-0.935744	0.187917	-4.97957	6.37e-07	5.6e-06	1954.09	2530.85	2252.48	3812.96	4402.84	4661.44	4306.79	MYO9A	no
gene11293	471.38	-1.14784	0.230505	-4.97968	6.37e-07	5.6e-06	332.228	222.946	279.618	525.961	682.814	570.36	685.73	SENP8	down
gene11294	286.745	-0.270236	0.250863	-1.07723	0.281378	0.376124	318.759	227.074	223.455	377.163	321.496	289.22	250.05	GRAMD2	no
gene11295	5679.29	1.26165	0.231565	5.44838	5.08e-08	6.46e-07	9016.18	7651.37	8879.66	3978.29	4490.25	2549.66	3189.62	LOC101110145	up
gene11296	72.9751	1.05264	0.343036	3.06861	0.0021506	0.00612616	125.708	74.3152	111.13	37.1996	65.0762	53.3198	44.0766	CELF6	up
gene11297	1259.87	0.561342	0.21416	2.62114	0.0087637	0.0202349	1897.97	1228.27	1506.83	1127.36	965.458	972.682	1120.56	HEXA	no
gene113	530.963	-0.65185	0.27307	-2.38712	0.0169812	0.0354552	282.843	568.718	348.925	603.461	630.365	758.595	523.834	INPP5D	no
gene1130	6.33116	-0.639789	0.862361	-0.741904	0.458146	0.557363	7.85675	4.12862	2.3899	7.23326	7.77029	6.46301	8.47627	LOC101121643	no
gene11300	37.8919	-1.2378	0.637941	-1.94031	0.0523423	0.0926173	11.2239	38.1898	14.3394	92.9991	10.6841	62.2064	35.6003	LOC101116319	no
gene11302	4791.37	-0.707152	0.230597	-3.06661	0.002165	0.00615793	3011.38	3912.9	3633.84	4865.92	4404.78	6916.22	6794.58	ARIH1	no
gene11304	1862.84	-0.360162	0.175363	-2.05381	0.0399944	0.073641	1603.9	1633.9	1571.36	2217.51	1856.13	2163.49	1993.62	BBS4	no
gene11305	635.876	0.12785	0.209441	0.610432	0.541575	0.634094	558.951	767.924	677.536	686.126	578.886	634.99	546.72	ADPGK	no
gene11306	3925.93	-0.541078	0.22982	-2.35436	0.0185548	0.0382597	2935.06	3589.84	2822.47	3195.03	4505.8	4980.55	5452.79	NEO1	no
gene11307	11.0716	0.724473	0.7412	0.977432	0.328356	0.425789	5.61196	21.6753	15.5343	5.16661	15.5406	8.88663	5.08576	HCN4	no
gene11309	76.9742	-0.913401	0.354965	-2.57321	0.010076	0.0227729	67.3435	52.64	33.4586	70.266	100.042	125.221	89.8485	REC114	no
gene1131	10.3972	-1.44395	0.848864	-1.70104	0.0889357	0.145045	11.2239	1.03216	3.58485	9.29991	11.6554	26.6599	9.3239	LOC101116011	no
gene11310	3645.19	0.231112	0.182155	1.26876	0.204525	0.288467	4032.76	3700.28	4213.39	3117.54	3413.1	3140.21	3899.08	NPTN	no
gene11311	585.014	0.258469	0.271425	0.952269	0.340961	0.439107	463.548	732.831	739.673	697.493	569.174	520.272	372.108	CD276	no
gene11314	57.1446	0.705773	0.386106	1.82793	0.0675607	0.115023	65.0988	63.9937	90.8161	41.3329	68.9613	28.2757	41.5337	C7H15orf59	no
gene11315	4.65876	-0.620323	1.13916	-0.544544	0.586067	0.673098	0	8.25725	2.3899	3.09997	3.88514	5.65513	9.3239	TBC1D21	no
gene11316	322.88	0.788572	0.250207	3.15168	0.00162333	0.00481842	498.342	382.93	394.333	214.931	272.931	189.851	306.841	SDR39U1	no
gene11317	973.428	1.42772	0.208608	6.84403	7.7e-12	3.54e-10	1717.26	1301.55	1536.7	602.427	614.824	458.066	583.167	KHNYN	up
gene11319	334.23	1.46758	0.301892	4.86127	1.17e-06	9.4e-06	362.533	597.618	617.788	237.664	225.338	183.388	115.277	NYNRIN	up
gene11320	377.51	1.07825	0.254844	4.23101	2.33e-05	0.00012397	674.558	480.985	463.64	273.831	322.467	226.205	200.888	NFATC4	up
gene11322	246.466	0.127517	0.305163	0.417864	0.676046	0.750821	268.252	339.579	168.488	312.064	213.683	253.673	169.525	RIPK3	no
gene11323	272.107	0.489323	0.249033	1.96489	0.0494264	0.0882983	274.986	416.991	284.398	257.297	233.109	246.402	191.564	ADCY4	no
gene11324	166.842	0.451999	0.235049	1.923	0.0544803	0.095914	189.684	186.82	215.091	153.965	128.21	155.112	139.011	LTB4R	no
gene11325	39.9288	1.2236	0.432099	2.83175	0.00462937	0.0117643	71.8331	30.9647	75.2818	24.7998	27.196	29.0835	20.3431	LTB4R2	no
gene11326	26.9763	-0.172538	0.469157	-0.367761	0.713052	0.780664	21.3255	27.8682	26.2889	28.933	26.2247	40.3938	17.8002	CIDEB	no
gene11327	340.846	0.661352	0.210241	3.14568	0.001657	0.0049005	482.629	430.409	381.189	297.597	262.247	250.441	281.412	NOP9	no
gene11328	1335.01	1.35366	0.246599	5.48933	4.03e-08	5.27e-07	2431.1	1550.3	2159.27	798.759	1039.28	620.449	745.912	DHRS1	up
gene11329	354.668	1.50782	0.250437	6.02075	1.74e-09	3.64e-08	666.701	453.117	569.99	195.298	256.419	163.999	177.154	RABGGTA	up
gene1133	1255.78	1.28039	0.270286	4.73718	2.17e-06	1.6e-05	2025.92	1374.83	2273.99	896.924	944.09	502.499	772.188	LOC101122398	up
gene11330	1658.01	1.3089	0.235671	5.55394	2.79e-08	3.85e-07	3004.64	1917.75	2622.91	1177.99	856.674	856.348	1169.73	TGM1	up
gene11331	121.306	1.0267	0.322564	3.18295	0.00145785	0.00438278	115.606	217.785	179.242	115.732	82.5593	67.8616	70.3531	TINF2	up
gene11332	163.827	0.528331	0.291464	1.81268	0.0698809	0.118185	163.869	210.56	221.065	175.665	129.181	90.4821	155.963	GMPR2	no
gene11333	2883.98	-0.361044	0.282301	-1.27893	0.200921	0.284182	3580.43	1762.92	2099.52	2404.54	3642.32	2752.43	3945.7	NEDD8	no
gene11334	183.527	-0.826341	0.297157	-2.78082	0.00542211	0.0134804	142.544	125.923	113.52	150.865	247.678	193.082	311.079	MDP1	no
gene11335	1861.5	0.692281	0.212906	3.25158	0.00114764	0.00356099	2708.33	2007.54	2423.36	1431.15	1684.21	1173.04	1602.86	TM9SF1	no
gene11337	690.767	1.46497	0.231022	6.34128	2.28e-10	6.48e-09	1003.42	1218.98	1037.22	526.995	359.376	356.273	333.117	IPO4	up
gene11338	46.1514	0.072985	0.460703	0.158421	0.874125	0.908058	34.7942	84.6368	22.704	49.5995	39.8227	52.5119	38.9908	REC8	no
gene11339	609.827	0.359544	0.300288	1.19733	0.231178	0.3196	766.594	744.185	581.94	540.428	852.789	437.869	344.984	IRF9	no
gene1134	63.1152	1.13046	0.385335	2.9337	0.00334944	0.00892002	120.096	91.8619	62.1373	64.066	33.995	31.5072	38.1432	LOC101122645	up
gene11340	507.364	0.892687	0.224028	3.98471	6.76e-05	0.000312327	668.946	724.574	672.756	438.129	420.567	340.924	285.65	RNF31	no
gene11341	1179.28	-0.269221	0.274711	-0.980014	0.327079	0.424295	1432.17	813.339	921.305	948.59	1520.06	1044.58	1574.89	PSME2	no
gene11342	337.332	0.434012	0.376123	1.15391	0.248538	0.339484	679.047	178.563	331.001	221.131	376.859	257.712	317.013	EMC9	no
gene11343	2889.27	0.335131	0.256004	1.30909	0.190505	0.272059	4458.14	2260.42	3114.04	2413.84	2993.5	2134.41	2850.57	PSME1	no
gene11344	152.763	-0.105566	0.334375	-0.315711	0.752222	0.813187	211.01	123.859	103.961	201.498	186.487	135.723	106.801	FITM1	no
gene11345	1033.26	1.2854	0.212263	6.05567	1.4e-09	3.03e-08	1571.35	1339.74	1763.74	726.426	681.843	510.577	639.111	DCAF11	up
gene11346	549.505	1.13135	0.31422	3.60049	0.000317616	0.00118612	1213.31	456.213	721.749	331.697	400.17	285.18	438.223	PCK2	up
gene11347	25.9235	-0.722818	0.505231	-1.43067	0.152525	0.226581	16.8359	18.5788	21.5091	22.7331	20.397	50.8962	30.5146	NRL	no
gene11349	6.44957	1.05121	0.958022	1.09727	0.272525	0.366568	8.97914	4.12862	14.3394	3.09997	9.71286	4.03938	0.847627	CPNE6	no
gene1135	16.248	-0.458186	0.5624	-0.814699	0.415245	0.515364	12.3463	12.3859	15.5343	14.4665	20.397	25.0441	13.562	LOC101122904	no
gene11350	47.4278	1.10885	0.484166	2.29023	0.0220081	0.0442024	86.4242	89.7976	28.6788	41.3329	30.1099	40.3938	15.2573	LRRC16B	no
gene11351	900.244	0.859135	0.316274	2.71642	0.00659914	0.0159363	1816.03	745.217	1070.67	588.994	899.411	469.376	712.007	LOC101119050	no
gene11354	20.7143	0.763732	0.559636	1.36469	0.172349	0.25044	46.0181	19.611	15.5343	13.4332	22.3396	15.3496	12.7144	JPH4	no
gene11355	887.344	0.708933	0.222406	3.18756	0.00143477	0.0043225	1361.46	984.677	1074.26	788.425	786.742	561.474	654.368	AP1G2	no
gene11356	192.205	1.316	0.266578	4.93663	7.95e-07	6.77e-06	243.559	285.907	346.535	122.965	124.325	84.827	137.316	THTPA	up
gene11357	383.912	-0.666337	0.263147	-2.53218	0.0113356	0.0251934	329.983	346.804	185.217	423.662	468.16	527.543	406.013	ZFHX2	no
gene11358	749.84	-0.988759	0.238645	-4.14323	3.42e-05	0.00017325	566.808	418.023	455.275	709.893	891.64	1033.27	1173.96	NGDN	no
gene11359	7.75735	0.12025	0.801026	0.15012	0.88067	0.913281	8.97914	9.28941	5.97474	8.26658	12.6267	3.2315	5.93339	MYH7	no
gene1136	454.736	0.485492	0.289599	1.67643	0.0936549	0.151242	708.23	432.473	489.929	288.297	454.562	289.22	520.443	BOLA1	no
gene11360	88.8121	0.955338	0.454183	2.10342	0.0354288	0.0663344	156.013	109.409	102.766	30.9997	132.095	40.3938	50.01	LOC101120580	no
gene11361	19.2332	0.947581	0.578405	1.63826	0.101367	0.161514	21.3255	24.7717	33.4586	8.26658	24.2821	7.27088	15.2573	CMTM5	no
gene11362	65.1868	0.823418	0.364454	2.25932	0.0238634	0.0472788	112.239	77.4117	70.502	61.9994	38.8514	61.3986	33.9051	IL25	no
gene11363	2312.32	0.259491	0.220173	1.17857	0.238568	0.328251	2792.51	2744.5	2119.84	2596.74	1704.61	2289.52	1938.52	EFS	no
gene11364	454.14	0.0113998	0.279546	0.0407796	0.967472	0.977475	494.975	563.557	309.492	560.061	399.199	520.272	331.422	SLC22A17	no
gene11365	3285.63	-0.217338	0.253375	-0.857769	0.39102	0.490424	3867.76	3140.85	2009.9	4034.09	3259.64	3854.38	2832.77	PABPN1	no
gene11366	1292.74	0.656428	0.185716	3.53458	0.000408428	0.00147127	1552.27	1596.75	1752.99	1137.69	1042.19	1069.63	897.637	BCL2L2	no
gene11367	196.612	-0.00797448	0.248196	-0.0321297	0.974369	0.98247	239.07	190.949	157.733	205.631	204.941	208.432	169.525	PPP1R3E	no
gene11368	676.102	0.840823	0.19641	4.28095	1.86e-05	0.000102291	821.591	919.651	971.493	533.195	519.638	430.598	536.548	HOMEZ	no
gene11369	196.012	-0.969415	0.280209	-3.45961	0.000540955	0.00187329	149.278	144.502	86.0363	225.264	210.769	306.185	250.05	RNF212B	no
gene1137	13.9046	0.297275	0.620331	0.47922	0.631782	0.712725	21.3255	13.418	11.9495	7.23326	18.4544	9.69451	15.2573	SV2A	no
gene11371	2840.51	0.725874	0.216649	3.35046	0.000806772	0.00263883	3683.69	3642.48	3681.64	2960.47	2098.95	1888.01	1928.35	SLC7A8	no
gene11372	3.81081	-4.0024	1.56892	-2.55105	0.0107399	0.0240414	0	1.03216	0	10.3332	2.91386	6.46301	5.93339	CEBPE	no
gene11373	1073.6	-0.42851	0.242111	-1.76989	0.0767453	0.127921	1157.19	692.577	840.049	959.957	1219.94	1204.54	1440.97	C7H14orf119	no
gene11374	5416.9	-0.0397745	0.239253	-0.166244	0.867965	0.90314	5673.69	6454.07	3866.85	6514.07	4660.23	6102.69	4646.69	ACIN1	no
gene11376	541.863	0.748711	0.29779	2.51422	0.0119296	0.0263152	716.086	849.465	548.481	642.727	358.404	400.706	277.174	CDH24	no
gene11379	3117.85	0.463677	0.275998	1.68	0.0929567	0.150256	4738.74	2578.33	3779.62	2187.54	3044.01	1967.18	3529.52	PSMB5	no
gene1138	1066.4	1.20432	0.222312	5.41722	6.05e-08	7.53e-07	1693.69	1353.16	1681.29	696.46	870.272	581.671	588.253	SF3B4	up
gene11380	501.092	-0.235648	0.228617	-1.03076	0.302656	0.398937	518.545	499.564	346.535	556.961	470.102	610.754	505.186	C7H14orf93	no
gene11381	2561.67	0.556733	0.204111	2.7276	0.00637963	0.0154895	3247.08	3292.58	2865.49	2309.48	2244.64	1627.87	2344.54	AJUBA	no
gene11382	1078.18	0.15083	0.197889	0.762195	0.445944	0.545936	1307.59	1112.66	1008.54	1166.62	928.549	1050.24	973.076	HAUS4	no
gene11384	902.043	0.895274	0.217673	4.11292	3.91e-05	0.000194262	1388.4	1156.01	1132.81	709.893	742.062	496.844	688.273	PRMT5	no
gene11385	1157	0.345553	0.191687	1.80269	0.0714364	0.12041	1321.06	1344.9	1285.76	1192.45	945.061	1101.13	908.656	RBM23	no
gene11386	145.098	-0.309671	0.265901	-1.16461	0.244176	0.334477	135.809	147.598	99.1807	177.732	132.095	165.615	157.659	REM2	no
gene11387	3585.69	1.67499	0.247004	6.78124	1.19e-11	5.09e-10	6743.33	4432.08	6530.39	1977.78	2301.95	1324.11	1790.19	LRP10	up
gene11388	1594.98	2.09124	0.279507	7.48187	7.33e-14	6.66e-12	2784.66	2255.26	3462.96	880.391	822.679	477.455	481.452	MMP14	up
gene11389	1140.09	0.545725	0.283097	1.9277	0.0538928	0.0950264	2014.69	950.616	1205.7	824.592	1134.46	753.748	1096.83	MRPL52	no
gene1139	163.403	0.0903368	0.25297	0.357104	0.721014	0.787515	145.911	183.724	178.047	157.065	180.659	171.27	127.144	MTMR11	no
gene11391	451.893	0.328556	0.203473	1.61474	0.106366	0.168289	564.563	473.76	495.904	380.263	465.246	407.169	376.346	SLC7A7	no
gene11392	1786.83	0.479901	0.188275	2.54893	0.0108054	0.024164	2177.44	1879.56	2337.32	1618.18	1648.27	1346.73	1500.3	LOC101105503	no
gene11394	4.21716	0.042435	1.10649	0.0383509	0.969408	0.978969	2.24478	9.28941	1.19495	6.19994	4.85643	4.03938	1.69525	LOC101102398	no
gene11398	693.316	0.916503	0.240327	3.81356	0.00013698	0.00057552	997.807	733.863	1112.5	485.662	575.001	381.317	567.063	ABHD4	no
gene114	88.1822	1.35711	0.345039	3.93319	8.38e-05	0.000376517	88.669	131.084	186.412	56.8328	45.6504	66.2458	42.3814	NEU2	up
gene1140	1650.76	-0.220264	0.204701	-1.07603	0.281915	0.37668	1309.83	1686.54	1529.53	1474.55	1807.56	2068.97	1678.3	OTUD7B	no
gene11400	3895.18	-0.807397	0.232165	-3.47769	0.000505762	0.00176753	3128.11	2251.13	2800.96	3561.86	5210.95	4390	5923.22	DAD1	no
gene11401	283.982	-0.687175	0.270595	-2.5395	0.0111012	0.0247466	144.789	270.425	216.286	324.463	351.605	403.13	277.174	LOC101110848	no
gene1141	1454.62	-0.850112	0.194244	-4.37652	1.21e-05	7.03e-05	931.586	981.581	1079.04	1618.18	1598.74	1904.16	2069.06	VPS45	no
gene1142	527.146	0.814954	0.260789	3.12496	0.00177829	0.00520521	799.143	570.782	728.919	363.73	543.92	285.988	397.537	PLEKHO1	no
gene1143	3982.37	-0.269172	0.203962	-1.31971	0.186931	0.267895	3743.18	2960.22	3991.13	3880.13	3789.96	4515.22	4996.76	ANP32E	no
gene11435	86.095	1.54134	0.338616	4.55189	5.32e-06	3.48e-05	144.789	134.18	133.834	47.5329	70.9039	29.8914	41.5337	SALL2	up
gene11436	814.058	-0.307505	0.200003	-1.5375	0.12417	0.191324	670.068	777.214	702.63	1044.69	767.316	884.624	851.865	METTL3	no
gene11437	1376.97	0.891816	0.244048	3.65427	0.000257917	0.000991544	1982.15	1677.25	1948.96	954.79	1193.71	668.113	1213.8	TOX4	no
gene11439	1038.93	-0.590785	0.185622	-3.18272	0.00145897	0.00438536	743.024	789.6	885.457	1125.29	1170.4	1227.97	1330.77	RAB2B	no
gene1144	13.0624	-0.912707	0.749405	-1.21791	0.223259	0.31044	12.3463	12.3859	1.19495	12.3999	20.397	24.2363	8.47627	CA14	no
gene11440	1871.55	0.210025	0.188648	1.11332	0.265573	0.358995	1778.99	2157.21	2149.71	1755.62	1684.21	1984.95	1590.15	CHD8	no
gene11441	3877.43	-0.138081	0.185236	-0.745432	0.456011	0.55524	3489.52	3368.96	4142.89	3959.69	3791.9	3805.9	4583.12	SUPT16H	no
gene11442	13.0625	-1.16358	0.672572	-1.73004	0.0836229	0.137654	4.48957	12.3859	5.97474	17.5665	9.71286	21.8126	19.4954	RPGRIP1	no
gene11443	6796.34	-0.440437	0.210119	-2.09613	0.0360703	0.0673364	6277.54	5201.04	5456.14	6249.54	7378.86	7316.93	9694.31	HNRNPC	no
gene11445	16.1005	0.3413	0.626839	0.544477	0.586113	0.673105	25.815	11.3537	17.9242	9.29991	10.6841	10.5024	27.1241	TMEM253	no
gene11446	859.45	1.01144	0.20646	4.89899	9.63e-07	7.99e-06	1405.24	1152.92	1062.31	675.793	635.221	522.696	561.977	ZNF219	up
gene11447	1239.52	0.236137	0.289745	0.81498	0.415084	0.515202	1064.03	1941.49	1063.5	1335.05	1263.64	1273.21	735.74	ARHGEF40	no
gene11448	35.9729	-1.93549	0.555197	-3.48612	0.000490073	0.00171938	8.97914	23.7396	8.36464	47.5329	23.3109	85.6348	54.2481	LOC105615652	down
gene11449	162.58	-0.180843	0.305326	-0.592296	0.553652	0.644483	106.627	174.434	172.073	212.865	116.554	199.545	155.963	LOC101110239	no
gene1145	1709.06	0.824773	0.26006	3.17147	0.00151669	0.0045437	2545.59	1813.5	2466.37	1112.89	1590.97	867.659	1566.41	APH1A	no
gene11450	122.603	-0.0467725	0.278259	-0.16809	0.866513	0.902233	111.117	138.309	111.13	135.365	148.607	118.758	94.9342	RNASE13	no
gene11451	65.403	-0.614036	0.396741	-1.5477	0.121694	0.188289	57.242	70.1866	22.704	92.9991	67.0187	82.4033	65.2673	TPPP2	no
gene11452	1643.2	1.56778	0.211774	7.40306	1.33e-13	1.12e-11	2803.74	2188.17	2941.96	882.458	949.918	719.817	1016.3	NDRG2	up
gene11453	515.971	-0.0994095	0.299219	-0.332229	0.739716	0.802967	472.527	626.519	388.358	500.128	311.783	733.551	578.929	SLC39A2	no
gene11454	348.38	0.197325	0.236264	0.835188	0.403612	0.503558	404.061	382.93	340.56	368.896	246.707	386.972	308.536	METTL17	no
gene11457	1072.31	0.24093	0.360074	0.669113	0.503423	0.599397	864.242	1181.82	1480.54	995.09	1653.13	901.589	429.747	LOC101112822	no
gene11458	4.3579	-1.73348	1.16529	-1.4876	0.136857	0.207249	1.12239	2.06431	2.3899	10.3332	8.74157	1.61575	4.23814	LOC101113073	no
gene11459	117.426	-1.21789	0.441523	-2.75838	0.00580882	0.0142922	90.9138	62.9615	46.603	160.165	48.5643	189.851	222.926	LOC101113335	no
gene1146	203.96	-0.75853	0.322134	-2.35471	0.0185374	0.0382376	190.807	110.441	137.419	165.332	370.06	237.515	216.145	C1H1orf54	no
gene11461	19.1329	0.677009	0.570733	1.18621	0.235539	0.324633	31.427	23.7396	17.9242	16.5332	6.799	12.926	24.5812	LOC101113761	no
gene11462	154.386	-0.440689	0.303992	-1.44967	0.14715	0.219946	103.26	132.116	149.369	123.999	242.821	184.196	144.944	RNASE6	no
gene11463	75.9114	-0.360492	0.351054	-1.02688	0.304475	0.400934	88.669	62.9615	44.2131	90.9324	77.7029	105.024	61.8768	LOC105613768	no
gene11464	2108.71	-0.31723	0.244286	-1.2986	0.194082	0.276083	1860.93	1632.87	2052.92	1827.95	3236.32	1895.28	2254.69	RNASE4	no
gene1147	255.031	0.074199	0.273906	0.270892	0.786474	0.839967	306.413	197.142	284.398	294.497	171.918	253.673	277.174	CIART	no
gene1148	2728.31	-0.482274	0.221286	-2.17941	0.0293009	0.0564558	2426.61	1688.61	2557.19	2667.01	2994.47	3062.66	3701.59	MRPS21	no
gene11485	6.33659	-0.817725	0.881561	-0.927587	0.353622	0.45187	6.73435	4.12862	2.3899	5.16661	6.799	7.27088	11.8668	RNASE12	no
gene11489	7.92564	1.09768	0.81908	1.34014	0.180199	0.259947	11.2239	14.4502	8.36464	10.3332	1.94257	3.2315	5.93339	RNASE10	no
gene1149	1571.78	-0.379152	0.227207	-1.66875	0.0951676	0.153265	1381.67	1607.07	1034.83	2066.65	1441.39	1829.03	1641.85	PRPF3	no
gene11490	695.455	-0.15123	0.216554	-0.698349	0.484959	0.582155	829.448	559.429	573.575	712.993	773.144	727.088	692.511	PNP	no
gene11491	532.552	0.751875	0.188428	3.99025	6.6e-05	0.000306197	746.391	679.159	654.832	427.796	403.084	389.396	427.204	TMEM55B	no
gene11492	2808.42	-0.0213313	0.211652	-0.100785	0.919721	0.94193	2993.42	2435.89	2925.23	2714.54	2558.37	2433.32	3598.18	APEX1	no
gene11493	726.196	-0.281444	0.225724	-1.24685	0.212452	0.297903	731.8	698.77	509.048	839.058	653.675	916.131	734.893	OSGEP	no
gene11495	106.09	0.0472606	0.297838	0.158679	0.873922	0.908012	89.7914	97.0227	137.419	109.532	127.238	98.5608	83.0675	KLHL33	no
gene11496	47.18	0.0515627	0.436735	0.118064	0.906017	0.932127	28.0598	74.3152	41.8232	58.8994	35.9376	58.1671	33.0575	LOC106991258	no
gene11497	497.866	0.516096	0.225391	2.28978	0.0220342	0.0442496	607.214	615.165	580.745	518.728	383.658	453.218	326.336	LOC101117767	no
gene11498	1180.87	0.210935	0.219102	0.962727	0.335685	0.433256	1466.97	1087.89	1286.96	1034.36	888.727	1174.65	1326.54	PARP2	no
gene115	238.369	0.972282	0.235551	4.1277	3.66e-05	0.000183904	340.085	308.615	345.34	150.865	154.434	213.279	155.963	NGEF	no
gene1150	1702.25	-1.03865	0.217539	-4.77455	1.8e-06	1.36e-05	1056.17	1274.71	855.583	1821.75	2219.39	2533.5	2154.67	RPRD2	down
gene11500	7.51562	-2.11922	0.878334	-2.41278	0.0158314	0.0333848	2.24478	3.09647	2.3899	8.26658	12.6267	12.1181	11.8668	CCNB1IP1	no
gene11501	344.079	-0.0141366	0.210824	-0.0670541	0.946539	0.962524	381.613	319.968	325.026	342.03	318.582	327.19	394.147	TTC5	no
gene11509	16.7731	1.01298	0.686321	1.47596	0.139955	0.211062	15.7135	22.7074	32.2636	3.09997	26.2247	8.07876	9.3239	LOC101116991	no
gene11510	12.6362	0.237614	0.629393	0.377528	0.705781	0.774787	17.9583	9.28941	14.3394	14.4665	6.799	13.7339	11.8668	LOC105601958	no
gene1153	763.217	0.506747	0.197129	2.57064	0.0101512	0.0229155	1038.21	929.973	787.471	711.959	641.049	626.104	607.749	TARS2	no
gene1154	937.448	1.73643	0.275626	6.29995	2.98e-10	8.16e-09	1912.56	1068.28	1705.19	643.76	474.959	386.972	370.413	ECM1	up
gene1157	721.779	1.31609	0.288907	4.55539	5.23e-06	3.43e-05	1009.03	1072.41	1208.09	582.794	561.403	362.736	255.983	ADAMTSL4	up
gene1158	6788.09	0.454694	0.205997	2.20729	0.0272937	0.0530487	7567.17	7024.86	9492.67	6720.73	5774.29	4806.86	6130.04	MCL1	no
gene11585	913.246	0.636087	0.23976	2.65301	0.00797772	0.0186799	1385.03	1122.99	932.06	965.124	682.814	702.044	602.663	LPCAT4	no
gene11586	8.46758	-0.441598	0.732269	-0.603054	0.546473	0.638298	7.85675	7.22509	5.97474	8.26658	12.6267	9.69451	7.62864	NUTM1	no
gene11587	1644.03	-0.421343	0.243632	-1.72942	0.0837339	0.13781	1876.64	1029.06	1226.02	1570.65	1925.09	1820.14	2060.58	NOP10	no
gene11588	927.622	-0.598998	0.255228	-2.34692	0.0189296	0.0389432	474.772	931.005	744.453	1136.66	887.755	1127.79	1190.92	SLC12A6	no
gene1159	2934.26	0.242364	0.216497	1.11948	0.262935	0.356163	3544.52	2684.64	3427.11	2699.04	2669.09	2172.38	3343.04	ENSA	no
gene11590	1103.57	-0.104433	0.206995	-0.504519	0.613896	0.696961	1234.63	826.757	1113.69	1077.76	1111.15	1146.38	1214.65	EMC4	no
gene11591	1282.35	-1.41281	0.236785	-5.96664	2.42e-09	4.79e-08	555.584	882.494	534.142	1603.72	1575.43	1830.65	1994.47	KATNBL1	down
gene11592	1361.3	0.593144	0.249623	2.37616	0.017494	0.0363861	1871.03	1422.31	1764.94	1037.46	1260.73	754.556	1418.08	EMC7	no
gene11593	66.914	-1.29648	0.41092	-3.15507	0.00160458	0.00477105	33.6718	59.8651	15.5343	88.8658	87.4157	104.216	78.8293	CHRM5	down
gene11594	938.929	-0.569692	0.20214	-2.81831	0.00482767	0.012203	835.06	737.992	633.323	929.991	1118.92	1123.76	1193.46	AVEN	no
gene11597	915.03	-1.35238	0.232689	-5.81194	6.18e-09	1.06e-07	461.303	540.85	451.691	1614.05	991.683	1286.95	1058.69	RYR3	down
gene11599	1.80399	-1.1837	1.97098	-0.600565	0.54813	0.639884	0	3.09647	0	0	1.94257	0.807876	6.78102	LOC101123559	no
gene1160	1830.45	-0.819287	0.186766	-4.38672	1.15e-05	6.76e-05	1195.35	1402.7	1223.63	1945.75	2295.15	2281.44	2469.14	GOLPH3L	no
gene11601	5666.14	-1.36131	0.215331	-6.32193	2.58e-10	7.21e-09	2809.35	3012.86	3140.32	7573.22	5817.03	9716.32	7593.89	FMN1	down
gene11602	972.423	0.925882	0.269361	3.43733	0.000587489	0.00200962	934.953	1142.6	1922.67	588.994	811.995	664.074	741.674	GREM1	no
gene11603	29.8925	-0.0497366	0.445708	-0.11159	0.911148	0.935899	16.8359	34.0612	37.0434	26.8664	33.995	29.0835	31.3622	SCG5	no
gene11605	667.295	-0.487298	0.220503	-2.20994	0.0271094	0.0527098	459.059	602.779	566.406	747.092	601.226	824.841	869.665	ARHGAP11A	no
gene11606	1.98826	1.14529	1.84319	0.621361	0.534362	0.627755	5.61196	3.09647	0	0	0.971286	0	4.23814	GJD2	no
gene11607	90.6762	0.951863	0.388376	2.45088	0.0142507	0.0305832	181.828	129.02	64.5272	64.066	85.4732	42.0095	67.8102	ACTC1	no
gene11608	1624.17	-0.217146	0.202867	-1.07038	0.284446	0.379486	1280.65	1640.1	1537.9	1830.01	1437.5	1672.3	1970.73	AQR	no
gene11612	180.079	-0.374534	0.267683	-1.39917	0.161762	0.237742	134.687	134.18	193.582	175.665	191.343	179.348	251.745	ZNF770	no
gene11614	745.113	-0.97147	0.221925	-4.37747	1.2e-05	7.01e-05	496.097	457.245	489.929	769.826	1015.97	811.915	1174.81	DPH6	no
gene11623	1016.57	-1.43411	0.267127	-5.36866	7.93e-08	9.43e-07	515.178	672.966	357.29	1031.26	1580.28	1293.41	1665.59	C7H15orf41	down
gene11625	997.959	-1.70123	0.269826	-6.30491	2.88e-10	7.94e-09	464.67	535.689	308.297	1143.89	1923.15	1460.64	1149.38	MEIS2	down
gene11629	2.13422	1.98527	1.56816	1.26599	0.205518	0.289748	7.85675	2.06431	1.19495	1.03332	1.94257	0	0.847627	TMCO5A	no
gene1163	5.90101	-1.96789	0.972932	-2.02264	0.0431105	0.0785833	1.12239	3.09647	2.3899	10.3332	7.77029	7.27088	9.3239	HORMAD1	no
gene11631	3070.4	-0.559297	0.225445	-2.48085	0.0131068	0.0284604	1954.09	2500.91	2794.98	2727.97	3553.94	3651.6	4309.34	SPRED1	no
gene11632	605.719	-0.043197	0.268564	-0.160844	0.872216	0.90649	725.066	467.567	593.889	460.862	664.36	498.459	829.827	FAM98B	no
gene11633	2612.9	-0.615639	0.212802	-2.89302	0.00381556	0.0099658	2234.68	1869.23	1907.14	2458.28	2933.28	3035.19	3852.47	RASGRP1	no
gene11637	3523.31	0.952322	0.361279	2.63597	0.00838964	0.0194896	2183.05	4793.33	7624.97	3761.3	2067.87	1834.69	2397.94	THBS1	no
gene11638	136.347	-0.745717	0.38356	-1.9442	0.0518712	0.0919073	114.484	130.052	50.1878	105.399	211.74	221.358	121.211	FSIP1	no
gene11639	236.353	-1.37652	0.337226	-4.0819	4.47e-05	0.000218593	90.9138	102.183	178.047	231.464	491.471	307.801	252.593	GPR176	down
gene1164	1602	-0.599277	0.297565	-2.01394	0.0440161	0.0799528	772.206	979.516	1962.11	1735.98	2201.91	1745.82	1816.46	CTSS	no
gene11640	1791.72	-0.592352	0.233547	-2.53633	0.0112023	0.0249425	1410.85	1737.12	1018.1	1789.72	2076.61	2474.52	2035.15	EIF2AK4	no
gene11642	3696.05	-0.983143	0.256701	-3.82991	0.000128188	0.000544869	3008.01	1937.36	2171.22	3293.2	4870.03	4415.85	6176.66	SRP14	no
gene11643	778.384	0.594068	0.208489	2.8494	0.00438013	0.0112277	870.977	859.786	1162.68	677.86	613.853	694.773	568.758	BMF	no
gene11644	1722.59	-0.780437	0.191747	-4.07014	4.7e-05	0.000228381	1386.15	1220.01	1058.72	1896.15	2068.84	2320.22	2108.05	BUB1B	no
gene11646	1004.66	-0.253572	0.250702	-1.01145	0.311801	0.408723	908.015	1027	780.301	1430.12	840.162	1205.35	841.694	PAK6	no
gene11648	3.39935	0.822054	1.39453	0.589484	0.555537	0.645973	2.24478	4.12862	7.16969	5.16661	0	0	5.08576	ANKRD63	no
gene11649	62.3157	0.465275	0.35466	1.31189	0.189558	0.270943	50.5077	97.0227	74.0868	68.1993	44.6792	51.704	50.01	PLCB2	no
gene11650	236.026	0.469724	0.24904	1.88614	0.0592759	0.103073	255.905	271.457	314.271	231.464	181.63	156.728	240.726	INAFM2	no
gene11651	84.5978	1.28295	0.336951	3.80752	0.000140368	0.000587873	94.281	145.534	142.199	73.3659	53.4207	45.241	38.1432	C7H15orf52	up
gene11655	583.945	-0.168439	0.191752	-0.878419	0.379716	0.478987	525.28	549.107	561.626	661.327	555.576	574.4	660.302	KNSTRN	no
gene11656	720.17	0.489708	0.209962	2.33237	0.0196813	0.0402545	746.391	800.953	1038.41	696.46	603.169	592.981	562.824	IVD	no
gene11657	1250.84	1.31503	0.198112	6.63779	3.18e-11	1.16e-09	1869.91	1715.44	2115.06	911.391	718.752	714.162	711.159	BAHD1	up
gene11658	227.667	1.36863	0.268963	5.08855	3.61e-07	3.42e-06	321.004	344.74	384.773	130.199	184.544	95.3293	133.077	CHST14	up
gene11659	796.68	0.167378	0.233221	0.717679	0.472956	0.571477	1033.72	629.615	886.652	672.693	835.306	675.384	843.389	C7H15orf57	no
gene1166	3404.23	-0.426664	0.270006	-1.5802	0.114061	0.178252	2316.62	2145.85	4072.38	3613.53	4990.47	3487.6	3203.18	CTSK	no
gene11660	259.969	0.192688	0.205524	0.937547	0.348477	0.446803	285.088	285.907	268.863	249.031	235.051	241.555	254.288	RPUSD2	no
gene11662	692.874	-0.654801	0.296277	-2.2101	0.0270983	0.0527049	377.124	557.364	630.933	544.561	686.699	851.501	1201.94	CASC5	no
gene11663	491.582	-0.339867	0.2269	-1.49788	0.134165	0.203913	395.082	431.441	454.08	583.827	399.199	549.355	628.092	RAD51	no
gene11664	1067.9	0.444782	0.318869	1.39488	0.163054	0.239352	2037.14	655.419	1083.82	940.324	924.664	1005.81	828.132	RMDN3	no
gene11665	437.433	0.435418	0.3261	1.33523	0.181801	0.261867	807	271.457	463.64	307.93	448.734	370.815	392.451	GCHFR	no
gene11666	811.54	0.0255583	0.238076	0.107353	0.914509	0.938423	1040.46	624.455	794.641	882.458	711.953	925.826	700.988	DNAJC17	no
gene11668	416.767	-0.0746593	0.220778	-0.338165	0.735239	0.799223	423.142	406.67	383.578	497.028	341.893	472.607	392.451	ZFYVE19	no
gene11669	396.036	0.0510411	0.215341	0.237025	0.812638	0.86092	473.65	340.612	397.918	432.962	372.003	364.352	390.756	PPP1R14D	no
gene1167	908.203	0.0759699	0.276443	0.274812	0.783461	0.83748	523.035	1126.08	1157.91	834.925	845.019	987.224	883.227	ARNT	no
gene11670	1819.31	1.22126	0.220473	5.53929	3.04e-08	4.12e-07	3252.69	2153.08	2695.8	1320.59	1141.26	944.407	1227.36	SPINT1	up
gene11671	440.137	1.51741	0.262111	5.78916	7.07e-09	1.18e-07	795.776	548.075	757.597	272.797	287.501	162.383	256.831	RHOV	up
gene11672	501.478	1.60064	0.240488	6.65581	2.82e-11	1.05e-09	897.914	707.027	832.879	268.664	337.036	193.89	272.936	VPS18	up
gene11673	146.077	1.36526	0.312991	4.36196	1.29e-05	7.47e-05	190.807	206.431	276.033	105.399	113.64	75.1324	55.0958	DLL4	up
gene11674	3213.54	1.2911	0.293006	4.40641	1.05e-05	6.28e-05	3986.74	6935.06	3639.81	1562.38	1504.52	2790.4	2075.84	CHAC1	up
gene11675	1640.45	-0.128762	0.284526	-0.452548	0.650874	0.728829	1572.47	1610.16	1490.1	1064.32	1399.62	2622.36	1724.07	INO80	no
gene11676	27.765	-1.58761	0.509339	-3.11699	0.00182706	0.00532609	12.3463	13.418	13.1444	30.9997	30.1099	63.8222	30.5146	EXD1	down
gene11677	537.154	0.515826	0.319502	1.61447	0.106426	0.168367	346.819	667.805	930.865	515.628	532.265	318.303	448.395	CHP1	no
gene11679	314.315	-1.20013	0.236207	-5.08082	3.76e-07	3.55e-06	215.499	184.756	141.004	421.596	373.945	471.799	391.604	OIP5	down
gene1168	1005.96	-0.188139	0.253292	-0.742777	0.457617	0.556799	785.675	1224.14	785.081	1265.82	841.134	1231.2	908.656	SETDB1	no
gene11680	1321.9	-0.492716	0.201776	-2.4419	0.0146103	0.0312267	1110.05	1065.19	1042	1682.25	1241.3	1377.43	1735.09	NUSAP1	no
gene11681	368.979	-0.290014	0.21547	-1.34596	0.178315	0.257641	386.103	312.743	283.203	393.696	378.802	444.332	383.975	NDUFAF1	no
gene11683	2325.63	0.549278	0.230374	2.38429	0.0171121	0.0356937	3520.95	2356.41	2640.84	1733.92	2193.16	1560.82	2273.34	RTF1	no
gene11684	31.3373	0.459586	0.466412	0.985364	0.324445	0.421485	43.7733	49.5435	17.9242	28.933	20.397	28.2757	30.5146	ITPKA	no
gene11685	18.5173	-0.565606	0.605206	-0.934567	0.350012	0.448341	16.8359	21.6753	4.77979	30.9997	22.3396	18.5811	14.4097	LTK	no
gene11686	659.006	0.877049	0.224581	3.90526	9.41e-05	0.000416752	867.609	892.815	911.746	613.794	457.476	500.883	368.718	RPAP1	no
gene11687	1946.15	1.22587	0.201803	6.07459	1.24e-09	2.74e-08	3267.28	2449.31	2959.89	1399.12	1187.88	1055.89	1303.65	TYRO3	up
gene11689	2818.88	-0.557768	0.181874	-3.06679	0.00216372	0.00615533	2007.96	2459.63	2192.73	2965.64	3220.78	3580.51	3304.9	MGA	no
gene1169	2964.26	1.05746	0.190973	5.5372	3.07e-08	4.16e-07	4277.44	3969.67	4399.8	2182.38	2174.71	1632.72	2113.13	CERS2	up
gene11692	1321.85	0.442624	0.202089	2.19025	0.0285064	0.0550802	1532.07	1511.08	1627.52	1291.65	1062.59	1299.06	928.999	MAPKBP1	no
gene11693	319.937	0.333522	0.247726	1.34633	0.178195	0.25749	442.223	369.512	276.033	329.63	278.759	308.609	234.793	JMJD7	no
gene11694	1739.17	1.49313	0.288126	5.18221	2.19e-07	2.26e-06	3652.27	2580.39	2027.83	1417.72	850.846	967.027	678.102	PLA2G4B	up
gene11695	470.924	0.521226	0.296029	1.76073	0.0782846	0.130069	794.654	532.593	381.189	537.328	328.295	408.785	313.622	SPTBN5	no
gene11696	1399.5	0.567496	0.213206	2.66173	0.00777408	0.0182982	1306.46	1832.08	2018.27	1260.65	1063.56	1124.56	1190.92	EHD4	no
gene11697	954.191	-0.21874	0.330971	-0.660902	0.508675	0.60401	783.43	726.638	1107.72	1541.72	536.15	1218.28	765.407	PLA2G4E	no
gene11698	16.1166	-0.397207	0.639917	-0.620716	0.534786	0.628037	14.5911	16.5145	9.55959	35.133	14.5693	8.88663	13.562	PLA2G4D	no
gene11699	87.9175	0.320909	0.365974	0.876862	0.380561	0.479911	98.7705	89.7976	108.74	134.332	59.2484	70.2852	54.2481	PLA2G4F	no
gene117	2995.3	0.067935	0.166927	0.406975	0.684027	0.757667	3138.21	3038.67	3051.9	2722.81	2911.92	3035.19	3068.41	GIGYF2	no
gene1170	2481.73	1.13798	0.204803	5.55644	2.75e-08	3.8e-07	3898.07	2978.8	3940.94	1773.18	1608.45	1361.27	1811.38	FAM63A	up
gene11700	1283.67	0.525144	0.197647	2.65698	0.00788452	0.0185136	1516.35	1491.47	1656.2	1265.82	989.74	1145.57	920.523	VPS39	no
gene11701	2612.4	-0.536999	0.176872	-3.03609	0.00239669	0.00669555	2074.18	1997.22	2160.47	2760.01	2914.83	2979.45	3400.68	TMEM87A	no
gene11702	348.301	-0.333451	0.216869	-1.53757	0.124154	0.191316	301.924	287.972	320.246	317.23	410.854	436.253	363.632	GANC	no
gene11703	17.9289	-1.42352	0.814629	-1.74745	0.0805597	0.133279	3.36718	23.7396	0	29.9664	28.1673	25.852	14.4097	CAPN3	no
gene11704	2718.81	0.162308	0.203911	0.795978	0.426045	0.526232	2465.9	2610.32	3608.74	2673.21	2397.13	2724.16	2552.21	ZNF106	no
gene11705	1789.74	-0.920429	0.188388	-4.88581	1.03e-06	8.45e-06	1115.66	1166.34	1273.82	2018.08	2334.97	2054.43	2564.92	SNAP23	no
gene11706	1180.23	-0.54109	0.188016	-2.8779	0.00400333	0.0103804	895.669	906.233	1008.54	1322.65	1189.83	1430.75	1507.93	LRRC57	no
gene11707	945.075	-0.548329	0.227897	-2.40604	0.0161264	0.0339024	555.584	772.053	915.331	1132.52	929.521	1122.14	1188.37	HAUS2	no
gene11709	1056.31	-0.862062	0.273622	-3.15056	0.00162958	0.00483279	546.605	1065.19	547.286	1262.72	1522.01	1362.89	1087.51	STARD9	no
gene11710	385.913	0.0684786	0.258525	0.264882	0.791101	0.844032	405.184	495.435	287.983	457.762	346.749	403.13	305.146	CDAN1	no
gene11711	990.948	-0.927509	0.229192	-4.04687	5.19e-05	0.000248352	498.342	775.149	688.29	1012.66	1245.19	1439.63	1277.37	TTBK2	no
gene11714	1980.39	-1.0146	0.187559	-5.40949	6.32e-08	7.81e-07	1086.48	1359.35	1307.27	2320.84	2381.59	2701.54	2705.63	UBR1	down
gene11716	1476.59	-0.227696	0.199859	-1.13929	0.254584	0.346469	1180.76	1341.8	1512.8	1845.51	1512.29	1568.09	1374.85	TMEM62	no
gene11717	1489.92	-0.0047127	0.197495	-0.0238624	0.980962	0.987255	1642.06	1290.2	1529.53	1507.62	1326.78	1404.09	1729.16	CCNDBP1	no
gene11718	76.3432	-1.17016	0.30056	-3.89328	9.89e-05	0.000434752	43.7733	43.3506	46.603	87.8324	101.985	107.447	103.411	EPB42	down
gene11719	607.085	-0.221862	0.215599	-1.02905	0.303457	0.399746	520.79	534.657	608.229	556.961	632.307	590.557	806.093	LOC101118703	no
gene11720	17.0496	0.224248	0.540627	0.414792	0.678294	0.752923	22.4478	15.4823	17.9242	15.4998	10.6841	16.9654	20.3431	LOC101111733	no
gene11724	524.903	-2.11059	0.375621	-5.61894	1.92e-08	2.81e-07	254.783	201.27	87.2312	632.394	1260.73	767.482	470.433	MDGA2	down
gene1173	401.695	0.0661406	0.251919	0.262546	0.7929	0.845088	299.679	484.081	452.886	450.529	333.151	450.795	340.746	PRUNE	no
gene11733	1133.51	-1.54688	0.393535	-3.93072	8.47e-05	0.000379925	630.785	625.487	364.459	592.094	1333.58	2807.37	1580.82	RPS29	down
gene11734	273.419	-0.839433	0.237776	-3.53036	0.000415002	0.00149041	195.296	208.496	161.318	359.596	271.96	392.628	324.641	LRR1	no
gene11735	12522	-0.766696	0.320563	-2.39172	0.0167696	0.0350777	12982.7	6134.1	7701.44	8756.38	16652.7	13864	21562.8	RPL36AL	no
gene11736	777.654	0.680129	0.250553	2.71451	0.0066374	0.0160152	821.591	1023.9	1125.64	565.228	675.044	436.253	795.922	MGAT2	no
gene11737	528.653	0.0798988	0.256835	0.31109	0.755732	0.815805	538.748	426.281	671.561	475.329	593.456	377.278	617.92	DNAAF2	no
gene11738	768.989	-1.12081	0.214303	-5.23003	1.69e-07	1.82e-06	503.954	457.245	419.427	820.458	914.951	1181.92	1084.96	POLE2	down
gene11739	778.96	-1.04942	0.2511	-4.17931	2.92e-05	0.000150831	402.939	642.001	405.088	764.659	984.884	1116.48	1136.67	KLHDC1	down
gene1174	1579.44	-0.11387	0.202421	-0.562541	0.573748	0.662598	1638.69	1454.31	1432.74	1957.11	1336.49	1660.99	1575.74	BNIPL	no
gene11740	3343.58	-0.865888	0.181245	-4.77743	1.78e-06	1.35e-05	2468.14	2318.22	2037.39	3862.56	3851.15	4381.11	4486.49	KLHDC2	no
gene11741	3862.43	-1.16649	0.251015	-4.6471	3.37e-06	2.35e-05	2882.3	2124.18	1764.94	3531.9	5335.27	5331.98	6066.47	NEMF	down
gene11742	1924.51	1.13281	0.274189	4.1315	3.6e-05	0.000181153	2609.56	2425.57	3342.27	1265.82	1525.89	735.167	1567.26	ARF6	up
gene11745	1251.39	-1.39941	0.259125	-5.4005	6.65e-08	8.13e-07	670.068	828.821	439.741	1635.75	1515.21	2189.34	1480.8	VCPKMT	down
gene11746	1386.44	-0.640197	0.200337	-3.1956	0.00139538	0.00421945	896.792	1157.05	1099.35	1421.85	1563.77	1698.96	1867.32	SOS2	no
gene11747	694.767	-0.95031	0.210613	-4.51212	6.42e-06	4.07e-05	490.485	425.248	444.521	817.358	715.838	998.534	971.381	L2HGDH	no
gene11748	767.505	-0.634958	0.271083	-2.3423	0.0191652	0.0393616	662.212	396.348	691.875	736.759	801.311	849.885	1234.15	ATP5S	no
gene11749	236.963	-1.09123	0.307415	-3.5497	0.000385667	0.00140228	102.138	158.952	170.878	375.096	188.429	370.815	292.431	CDKL1	down
gene1175	34.1099	-0.469948	0.510531	-0.920509	0.357307	0.455524	50.5077	15.4823	17.9242	47.5329	30.1099	50.0883	27.1241	C1H1orf56	no
gene11750	2164.26	-0.72764	0.200664	-3.62616	0.000287671	0.0010888	1355.85	1799.05	1567.77	2280.54	2456.38	2668.41	3021.79	MAP4K5	no
gene11751	375.552	-1.16472	0.211171	-5.51553	3.48e-08	4.63e-07	199.786	248.75	210.311	477.395	450.677	546.932	495.014	ATL1	down
gene11752	973.036	-0.19528	0.231558	-0.843332	0.399043	0.498549	656.6	881.461	1157.91	1056.06	1111.15	942.791	1005.29	SAV1	no
gene11753	3097.38	-0.692419	0.211655	-3.27145	0.00106997	0.00335038	1770.01	2426.6	2676.68	3280.8	3564.62	4196.91	3766.01	NIN	no
gene11755	438.78	0.31343	0.247827	1.26472	0.205973	0.290199	512.933	498.531	469.615	454.662	452.619	260.136	422.966	ABHD12B	no
gene11756	1664.36	0.786315	0.277757	2.83095	0.004641	0.0117851	1541.04	2412.15	2616.94	1578.92	1355.92	788.487	1357.05	PYGL	no
gene11758	444.722	-0.757407	0.315282	-2.40231	0.0162918	0.0341953	278.353	369.512	308.297	710.926	654.647	265.791	525.529	TRIM9	no
gene1176	3756.9	0.54766	0.194372	2.81759	0.00483858	0.0122251	4105.71	4361.89	5285.26	3585.63	3046.92	2742.74	3170.13	CDC42SE1	no
gene11761	2029.49	-0.293857	0.185687	-1.58254	0.113527	0.177577	1897.97	1555.46	1939.4	2206.14	2050.38	2131.98	2425.06	TMX1	no
gene11763	10408.9	-2.05562	0.265262	-7.7494	9.23e-15	1.1e-12	3286.37	4981.19	2867.88	13401.2	11461.2	20253.4	16610.9	FRMD6	down
gene11765	5063.89	-0.761016	0.262291	-2.90141	0.00371482	0.00972644	4720.78	2906.55	3247.87	4473.25	5809.26	5887.8	8401.68	C7H14orf166	no
gene11766	998.409	0.328905	0.2847	1.15527	0.247981	0.338804	714.964	1329.42	1345.51	819.425	1241.3	848.27	689.968	NID2	no
gene11768	123.912	-0.0924689	0.324155	-0.285262	0.775444	0.831291	123.463	76.3796	158.928	126.065	90.3296	142.186	150.03	PTGDR	no
gene11769	115.039	1.48649	0.329557	4.51056	6.47e-06	4.1e-05	205.398	134.18	205.531	77.4992	87.4157	45.241	50.01	LOC105607710	up
gene11770	164.566	1.26388	0.356221	3.54801	0.00038815	0.00140951	140.299	241.525	358.485	140.532	113.64	89.6742	67.8102	PLEKHO2	up
gene11771	49.1183	-0.267944	0.407371	-0.657739	0.510706	0.605748	60.6092	48.5113	22.704	42.3662	59.2484	47.6647	62.7244	PIF1	no
gene11774	221.395	0.389485	0.318858	1.2215	0.221897	0.308943	250.294	279.714	237.795	144.665	309.84	201.161	126.296	RBPMS2	no
gene11775	2634.21	0.669262	0.203397	3.29042	0.00100039	0.00316673	3776.85	2879.72	3373.34	2068.71	2292.23	1715.12	2333.52	OAZ2	no
gene11776	5698.71	-0.742741	0.193376	-3.84092	0.000122576	0.000525325	4260.6	4354.67	3730.63	6095.57	6475.56	8325.97	6647.94	ZNF609	no
gene11778	1362.64	-0.752756	0.191969	-3.92124	8.81e-05	0.000393015	958.523	1072.41	906.966	1596.48	1420.02	1836.3	1747.81	TRIP4	no
gene11779	1253.52	-1.11167	0.249374	-4.45784	8.28e-06	5.09e-05	845.162	735.927	679.926	1149.06	1501.61	1630.29	2232.65	KIAA0101	down
gene11781	1513.19	-1.71518	0.279284	-6.14134	8.18e-10	1.93e-08	625.173	943.391	400.308	1965.38	2026.1	2624.79	2007.18	CSNK1G1	down
gene11782	6148.25	0.540515	0.274694	1.9677	0.0491028	0.0878395	9731.14	5437.4	7285.6	4362.69	6293.93	3557.88	6369.07	PPIB	no
gene11783	31.1073	-0.760602	0.456374	-1.66662	0.0955904	0.153859	20.2031	30.9647	15.5343	27.8997	35.9376	36.3544	50.8576	SNX22	no
gene11784	1932.99	0.734928	0.200667	3.66242	0.000249841	0.000964399	2311.01	2402.86	2798.57	1459.05	1620.1	1227.97	1711.36	SNX1	no
gene11785	1030.94	-0.935169	0.224151	-4.17206	3.02e-05	0.000154965	864.242	595.554	573.575	1141.82	1199.54	1452.56	1389.26	FAM96A	no
gene11786	796.928	-1.32296	0.334257	-3.95792	7.56e-05	0.00034457	363.655	614.133	308.297	1527.25	670.187	1333.8	761.169	DAPK2	down
gene11787	3106.99	-0.0888901	0.181997	-0.488415	0.625256	0.706948	2606.2	3211.04	3177.37	2942.9	3085.78	3330.06	3395.59	HERC1	no
gene11789	46.9694	0.596888	0.384461	1.55253	0.120535	0.186783	63.9764	48.5113	62.1373	36.1663	55.3633	36.3544	26.2764	FBXL22	no
gene1179	323.552	0.278507	0.274955	1.01292	0.3111	0.407961	280.598	321.001	477.979	264.531	248.649	397.475	274.631	GABPB2	no
gene11790	6168.75	-1.23245	0.204597	-6.02382	1.7e-09	3.57e-08	3664.61	3781.82	3001.71	7133.03	7052.51	9496.58	9050.96	USP3	down
gene11791	1507.9	-0.388408	0.235554	-1.64891	0.0991659	0.158525	1652.16	952.68	1240.36	1629.55	1801.74	1874.27	1404.52	CA12	no
gene11792	329.841	0.00897522	0.235537	0.0381053	0.969604	0.979109	248.049	343.708	401.503	329.63	305.955	322.342	357.699	APH1B	no
gene11794	2022.27	-0.746567	0.21173	-3.52602	0.000421851	0.00151198	1114.54	1536.88	1721.92	2243.34	2450.55	2370.31	2718.34	RAB8B	no
gene11797	2585.19	-0.503712	0.281894	-1.78688	0.0739566	0.124033	2869.96	1538.94	1852.17	1934.38	3361.62	2846.15	3693.11	RPS27L	no
gene11798	739.519	-0.380285	0.260681	-1.45882	0.144616	0.216809	718.331	462.406	712.189	634.46	920.779	685.886	1042.58	LACTB	no
gene11800	17756.6	0.132829	0.192282	0.690802	0.48969	0.586521	16894.3	19865.9	19328.3	20440.2	16956.7	15935.3	14875.9	TPM1	no
gene11802	2211.77	-0.754266	0.24281	-3.1064	0.00189378	0.00549153	1258.2	2186.11	1320.42	2551.27	2530.2	3162.83	2473.38	TLN2	no
gene11805	32.8788	1.32505	0.41156	3.21958	0.00128379	0.00392504	47.1405	43.3506	59.7474	22.7331	18.4544	22.6205	16.1049	C2CD4B	up
gene11808	1544.51	-0.622068	0.214133	-2.90505	0.00367189	0.00963027	915.872	1194.2	1432.74	1633.68	1744.43	1928.4	1962.26	VPS13C	no
gene11809	13508.2	-1.87537	0.224413	-8.35675	6.45e-17	1.51e-14	6589.57	5061.69	4397.41	15743.7	20552.4	23665.9	18546.9	RORA	down
gene1181	91.7834	1.1742	0.320124	3.66795	0.000244499	0.000946983	138.054	112.505	152.953	64.066	81.588	50.0883	43.229	SEMA6C	up
gene11810	846.261	-1.0367	0.202812	-5.11163	3.19e-07	3.08e-06	549.972	498.531	537.727	945.49	1117.95	1292.6	981.552	ICE2	down
gene11812	25138.9	0.644044	0.253813	2.53748	0.0111655	0.0248737	35680.9	26892.8	32380.7	20778.1	24193.8	12459.1	23586.9	ANXA2	no
gene11816	1068.59	-0.497513	0.215901	-2.30435	0.0212028	0.0428821	720.576	832.95	1042	1096.36	1282.1	1090.63	1415.54	BNIP2	no
gene11818	1587.4	-0.947975	0.240973	-3.93395	8.36e-05	0.000375528	1251.47	785.471	1074.26	1535.52	2083.41	1923.55	2458.12	GTF2A2	no
gene11819	18.3747	-0.79573	0.600536	-1.32503	0.18516	0.26578	17.9583	12.3859	8.36464	27.8997	18.4544	10.5024	33.0575	GCNT3	no
gene1182	52.9006	0.705806	0.433453	1.62833	0.103454	0.164458	56.1196	50.5757	96.7908	52.6995	59.2484	21.8126	33.0575	TNFAIP8L2	no
gene11820	333.472	0.42379	0.267955	1.58157	0.113747	0.177844	409.673	330.29	431.376	229.398	246.707	269.83	417.033	FAM81A	no
gene11821	4403.92	-0.519002	0.186931	-2.77644	0.00549584	0.013628	3630.94	3820.01	3140.32	5045.72	4334.85	5321.48	5534.16	MYO1E	no
gene11822	326.821	0.241391	0.218697	1.10377	0.269694	0.363475	406.306	350.933	317.856	296.564	290.414	273.062	352.613	CCNB2	no
gene11823	1165.1	-0.212098	0.221379	-0.958079	0.338023	0.435912	860.875	1220.01	1124.45	1051.92	1236.45	1145.57	1516.4	RNF111	no
gene11824	5525.6	-0.779308	0.213435	-3.65126	0.000260954	0.00100097	4918.32	3754.98	3088.94	5973.64	6632.91	7030.94	7279.42	SLTM	no
gene11825	1671.59	-0.72642	0.210995	-3.44282	0.000575673	0.00197354	1160.55	1125.05	1364.63	1659.52	2051.36	1857.31	2482.7	FAM63B	no
gene11826	3503.62	-0.681294	0.201945	-3.37366	0.000741748	0.00245526	2180.81	2540.14	3094.92	3798.5	3990.04	4124.21	4796.72	ADAM10	no
gene11827	368.304	-1.35785	0.347604	-3.90631	9.37e-05	0.000415176	179.583	306.55	96.7908	408.163	686.699	479.07	421.271	LIPC	down
gene11829	1805.8	-0.520936	0.248942	-2.0926	0.0363852	0.067843	1462.48	1260.26	1616.77	1902.35	1841.56	1594.75	2962.46	AQP9	no
gene1183	175.263	0.130243	0.231495	0.562619	0.573694	0.662581	204.275	168.241	180.437	180.832	173.86	162.383	156.811	LYSMD1	no
gene11830	108.332	-0.557523	0.302789	-1.84129	0.0655784	0.112263	75.2003	71.2188	109.935	108.499	144.722	147.033	101.715	ALDH1A2	no
gene11832	817.736	0.564425	0.21399	2.63763	0.00834888	0.0194213	1032.6	803.018	1174.63	725.393	677.958	583.286	727.264	POLR2M	no
gene11833	2675.98	-0.242696	0.215596	-1.1257	0.260295	0.353121	2263.87	2232.55	2771.09	3301.47	2214.53	3261.39	2686.98	MYZAP	no
gene11834	3227.7	0.352016	0.21959	1.60306	0.10892	0.171568	3536.66	3449.47	4064.02	2671.14	3729.74	2887.35	2255.54	CGNL1	no
gene11835	10337.9	-1.54624	0.216548	-7.14039	9.31e-13	5.87e-11	4641.09	5583.97	4561.12	10495.5	15278.3	15167.1	16638.1	TCF12	down
gene11836	2696.47	-1.26128	0.256658	-4.91423	8.91e-07	7.48e-06	1553.39	1464.63	1480.54	2469.64	3503.43	3180.61	5223.08	ZNF280D	down
gene11837	403.743	-0.759621	0.351068	-2.16374	0.0304843	0.0584331	429.876	277.65	160.123	307.93	470.102	452.41	728.112	MNS1	no
gene1184	351.208	0.460177	0.239967	1.91767	0.0551525	0.096888	538.748	358.158	351.315	315.163	327.323	261.752	305.993	LOC101112865	no
gene11840	1023.58	-1.33737	0.229902	-5.81712	5.99e-09	1.04e-07	656.6	538.786	444.521	1090.16	1364.66	1408.13	1662.2	TEX9	down
gene11842	2421.06	-0.959907	0.212454	-4.51819	6.24e-06	3.98e-05	1498.39	1728.86	1488.91	2320.84	2984.76	3313.91	3611.74	RFX7	no
gene11844	1996.63	-0.427241	0.212666	-2.00897	0.0445398	0.0807497	1602.78	1537.91	1864.12	1750.45	2491.35	2100.48	2629.34	NEDD4	no
gene11845	38.61	-1.1314	0.467314	-2.42106	0.0154753	0.0327793	16.8359	24.7717	27.4838	25.8331	50.5069	46.8568	77.9817	PRTG	no
gene11846	528.552	-0.501392	0.210323	-2.38391	0.0171296	0.0357259	387.225	396.348	498.294	514.595	657.561	623.68	622.158	PYGO1	no
gene11847	749.953	-0.855803	0.242116	-3.53468	0.000408266	0.001471	661.089	423.184	454.08	749.159	1032.48	851.501	1078.18	DYX1C1	no
gene11849	42.1624	-0.462945	0.36631	-1.26381	0.2063	0.290444	31.427	31.9968	40.6283	53.7328	45.6504	48.4725	43.229	C7H15orf65	no
gene1185	109.488	-0.721979	0.38783	-1.86158	0.0626618	0.108048	83.057	116.634	39.4333	167.398	95.186	167.23	97.4771	TMOD4	no
gene11850	4812.63	-0.420936	0.254444	-1.65434	0.0980595	0.157035	4153.97	3098.53	4844.32	3888.39	5672.31	4864.22	7166.69	CCPG1	no
gene11851	792.071	-1.37854	0.251558	-5.47999	4.25e-08	5.52e-07	401.816	512.982	326.221	826.658	946.032	1193.23	1337.56	PIGB	down
gene11852	287.793	-0.347275	0.248029	-1.40014	0.161472	0.237377	253.661	193.013	301.127	264.531	325.381	301.338	375.499	LOC105610830	no
gene11853	1725.99	-0.674903	0.293329	-2.30084	0.0214008	0.0432364	1638.69	773.085	1450.67	1472.49	1855.16	2148.95	2742.92	RAB27A	no
gene11854	1913.5	-0.412776	0.215437	-1.916	0.0553653	0.097205	1700.42	1547.2	1579.72	1714.28	1962	2134.41	2756.48	RSL24D1	no
gene11855	19.8848	0.35207	0.560524	0.628108	0.529933	0.623451	13.4687	25.8039	28.6788	21.6998	19.4257	8.07876	22.0383	LOC101105256	no
gene11857	260.719	-1.877	0.344225	-5.45285	4.96e-08	6.33e-07	118.974	127.987	62.1373	241.798	464.275	285.18	524.681	UNC13C	down
gene11859	40.6643	-0.661694	0.489617	-1.35145	0.17655	0.255388	22.4478	40.2541	28.6788	26.8664	90.3296	38.778	37.2956	WDR72	no
gene1186	848.283	0.430168	0.192045	2.23993	0.0250956	0.0493144	1143.72	921.715	918.915	798.759	716.809	696.389	741.674	VPS72	no
gene11864	6.38064	-2.80681	1.11602	-2.51501	0.0119027	0.0262798	1.12239	3.09647	0	9.29991	4.85643	16.9654	9.3239	ONECUT1	no
gene11865	5808.58	-0.647341	0.214888	-3.01245	0.00259144	0.00715524	3580.43	4639.54	4945.89	5661.58	6889.33	6553.49	8389.81	FAM214A	no
gene11866	603.484	-0.856301	0.24038	-3.56229	0.000367639	0.00134617	319.882	446.924	470.81	618.96	766.345	665.69	935.78	ARPP19	no
gene11867	2123.01	-0.0620201	0.211854	-0.292749	0.769714	0.827025	1603.9	2048.83	2560.77	2141.05	1992.11	2258.01	2256.38	MYO5A	no
gene11868	881.015	-0.600434	0.223696	-2.68415	0.00727144	0.017325	600.48	783.407	657.222	997.157	812.966	1271.6	1044.28	MYO5C	no
gene11869	197.148	0.0406028	0.226252	0.179459	0.857578	0.895547	190.807	204.367	205.531	208.731	205.913	168.038	196.649	GNB5	no
gene11870	10.671	-0.15832	1.08085	-0.146478	0.883544	0.915063	11.2239	10.3216	8.36464	7.23326	35.9376	1.61575	0	BCL2L10	no
gene11873	4365.72	-0.194516	0.201244	-0.966568	0.33376	0.43126	3425.54	3863.36	4810.86	4189.09	4461.12	4486.94	5323.1	MAPK6	no
gene11874	810.252	-0.0592557	0.195291	-0.303422	0.761569	0.82018	709.352	800.953	863.948	815.292	715.838	862.811	903.571	LEO1	no
gene11875	166.182	-1.1121	0.278485	-3.99338	6.51e-05	0.000302758	111.117	90.8297	97.9858	213.898	151.521	268.215	229.707	LOC105607297	down
gene11876	5549.36	-0.176107	0.235575	-0.747562	0.454724	0.554068	3685.94	5139.11	6673.79	4891.75	5893.76	6163.28	6397.89	TMOD3	no
gene11877	295.152	0.70767	0.351877	2.01113	0.0443116	0.08037	194.174	344.74	598.669	196.331	315.668	235.092	181.392	TMOD2	no
gene11878	70.1947	0.256026	0.342043	0.748519	0.454147	0.553691	59.4868	104.248	68.1121	61.9994	79.6454	67.8616	50.01	LYSMD2	no
gene11879	21.2739	-0.443818	0.501879	-0.884313	0.376527	0.475678	13.4687	14.4502	25.0939	25.8331	25.2534	19.389	25.4288	SCG3	no
gene1188	1743.7	-0.127895	0.234754	-0.544804	0.585888	0.672982	1221.16	1913.62	1833.05	2122.45	1454.99	1968.79	1691.86	PIP5K1A	no
gene11880	445.191	-1.24425	0.318159	-3.91078	9.2e-05	0.00040862	132.442	346.804	270.058	493.928	473.016	761.827	638.263	DMXL2	down
gene11882	417.713	-0.611035	0.316901	-1.92816	0.0538354	0.0949449	171.726	431.441	359.68	549.728	372.003	615.601	423.814	GLDN	no
gene11885	3.36003	0.813559	1.11239	0.731358	0.46456	0.563363	5.61196	4.12862	3.58485	4.13329	1.94257	2.42363	1.69525	CYP19	no
gene11888	1733.7	-0.218562	0.217696	-1.00398	0.315389	0.412352	1807.05	1396.51	1553.43	1871.35	1384.08	2071.39	2052.11	TNFAIP8L3	no
gene11889	1073.11	-0.582919	0.22171	-2.6292	0.00855855	0.0198308	753.125	775.149	978.663	1150.09	1005.28	1332.19	1517.25	AP4E1	no
gene1189	3262.71	1.07966	0.306434	3.52329	0.00042622	0.00152636	6197.85	3403.02	4403.39	1822.78	2761.37	1298.26	2952.29	PSMD4	up
gene11890	3210.91	-0.286883	0.241526	-1.18779	0.234915	0.323914	1967.55	2767.21	3822.64	3229.13	3554.91	3298.56	3836.36	SPPL2A	no
gene11891	1501.19	-0.741967	0.27769	-2.67193	0.00754169	0.0178355	659.967	1153.95	1439.91	1559.28	1557.94	1842.76	2294.53	TRPM7	no
gene11892	418.763	-2.04001	0.288827	-7.06308	1.63e-12	9.41e-11	143.666	215.721	92.011	580.727	595.398	754.556	549.262	USP50	down
gene11894	3466.31	-0.141355	0.19921	-0.709579	0.477965	0.575821	3579.31	2605.16	3637.42	3312.83	3569.48	3583.74	3976.22	USP8	no
gene11896	1543.15	-0.770364	0.20554	-3.74801	0.000178245	0.0007221	1014.64	1244.78	1039.61	1644.02	1757.06	1802.37	2299.61	GABPB1	no
gene11897	25.25	-0.598865	0.481558	-1.2436	0.213648	0.299383	22.4478	21.6753	14.3394	28.933	31.0811	38.778	19.4954	HDC	no
gene11898	15.2013	-0.274741	0.603541	-0.455216	0.648954	0.727346	12.3463	8.25725	20.3141	10.3332	19.4257	14.5418	21.1907	SLC27A2	no
gene11899	624.839	-1.27552	0.2897	-4.40292	1.07e-05	6.35e-05	249.171	470.663	314.271	617.927	1170.4	803.836	747.607	ATP8B4	down
gene11902	539.964	-0.734834	0.282762	-2.59877	0.00935579	0.0213568	414.163	399.444	360.874	387.496	664.36	626.104	927.304	DTWD1	no
gene11903	225.512	-1.15641	0.241462	-4.78921	1.67e-06	1.28e-05	114.484	154.823	127.859	257.297	345.778	287.604	290.736	FAM227B	down
gene11905	556.892	-0.989044	0.202257	-4.89004	1.01e-06	8.3e-06	343.452	352.997	372.824	616.894	769.258	789.295	653.521	GALK2	no
gene11906	4688.09	-0.81718	0.245307	-3.33125	0.000864556	0.00280104	2954.14	3198.65	3645.79	4252.12	5362.47	5256.04	8147.39	COPS2	no
gene11908	5542.52	-0.260739	0.243608	-1.07032	0.284475	0.379486	4932.91	3549.59	6455.11	4860.75	6083.16	5806.2	7109.9	SECISBP2L	no
gene11909	221.769	-0.56036	0.231781	-2.41763	0.0156222	0.0330131	147.033	198.174	178.047	241.798	272.931	277.909	236.488	SHC4	no
gene11911	464.44	-0.587667	0.221406	-2.65425	0.00794842	0.0186265	319.882	392.219	370.434	427.796	562.375	547.74	630.635	CEP152	no
gene11912	4405.16	0.341458	0.25086	1.36115	0.173466	0.251699	3385.14	5996.83	5642.55	4003.09	4965.21	3368.03	3475.27	FBN1	no
gene11913	930.052	-0.201739	0.26698	-0.755633	0.449869	0.549576	1225.65	628.583	715.774	830.792	1048.99	895.934	1164.64	DUT	no
gene11914	5.37647	-2.95071	1.2205	-2.41762	0.0156223	0.0330131	1.12239	1.03216	1.19495	3.09997	7.77029	6.46301	16.9525	SLC12A1	no
gene11916	325.311	-0.0557333	0.253703	-0.21968	0.826121	0.872232	260.395	301.39	393.138	249.031	370.06	317.495	385.67	MYEF2	no
gene11917	1048.5	-0.421555	0.214488	-1.9654	0.049368	0.0882217	735.167	863.915	1036.02	1006.46	1159.72	1144.76	1393.5	SLC24A5	no
gene11918	406.371	-0.251625	0.29187	-0.862114	0.388625	0.488243	261.517	400.477	437.351	358.563	624.537	445.14	317.013	SEMA6D	no
gene1192	487.075	1.48908	0.216424	6.88037	5.97e-12	2.87e-10	748.636	786.503	775.522	344.097	273.903	235.9	244.964	ZNF687	up
gene11922	2.57961	1.65956	1.43495	1.15653	0.247466	0.338236	3.36718	1.03216	8.36464	0	1.94257	0.807876	2.54288	LOC101113241	no
gene11923	756.481	0.369799	0.254325	1.45404	0.145935	0.218518	860.875	1060.02	684.706	575.561	923.693	576.823	613.682	SQRDL	no
gene11925	2311.03	-0.638253	0.217905	-2.92904	0.00340009	0.00903662	1661.14	1616.36	1983.61	2360.11	2293.21	2779.9	3482.9	BLOC1S6	no
gene11927	737.839	-0.315582	0.259384	-1.21666	0.223734	0.310919	410.796	737.992	793.446	872.125	704.182	908.052	738.283	SLC30A4	no
gene11929	50.3768	-0.059571	0.421793	-0.141233	0.887686	0.918407	52.7524	33.029	62.1373	42.3662	38.8514	39.5859	83.9151	C7H15orf48	no
gene1193	1530.93	0.828834	0.198443	4.17668	2.96e-05	0.000152307	2172.95	2070.51	1877.26	1404.29	1085.9	1083.36	1022.24	PI4KB	no
gene11930	398.447	-0.358668	0.200489	-1.78896	0.0736208	0.12352	332.228	352.997	344.145	431.929	415.71	412.017	500.1	SPATA5L1	no
gene11931	3763.15	0.37163	0.228619	1.62554	0.104047	0.165215	3380.65	4058.44	5533.81	3890.46	3061.49	2863.92	3553.25	GATM	no
gene11936	1733.89	0.434259	0.237386	1.82934	0.0673487	0.114753	2716.19	1666.93	1725.51	1729.78	1629.82	1330.57	1338.4	SHF	no
gene11937	556.409	0.403858	0.286543	1.40942	0.158712	0.233903	667.824	612.069	659.612	720.226	388.514	537.237	309.384	DUOX1	no
gene11938	344.759	1.00726	0.259846	3.87639	0.000106019	0.000462363	536.504	386.026	528.167	318.263	199.114	253.673	191.564	DUOXA1	up
gene11939	16.3778	-0.325242	0.634628	-0.512492	0.608307	0.692306	23.5702	13.418	5.97474	16.5332	11.6554	29.0835	14.4097	DUOXA2	no
gene11940	77.2446	0.108614	0.440506	0.246567	0.805244	0.854743	80.8123	94.9584	65.7222	125.032	40.794	96.9451	36.448	DUOX2	no
gene11942	375.544	0.265915	0.259831	1.02342	0.306111	0.40284	436.611	421.12	388.358	313.097	499.241	277.101	293.279	SORD	no
gene11945	2427.8	-0.259208	0.231807	-1.11821	0.263478	0.356784	1625.22	2303.77	2618.13	2242.31	3203.3	2377.58	2624.25	FERMT2	no
gene11946	2742.6	-0.937618	0.234821	-3.9929	6.53e-05	0.000303287	1967.55	1349.03	2086.38	3107.2	2771.08	3787.32	4129.64	DDHD1	no
gene11949	2121.86	0.267883	0.183066	1.46331	0.143381	0.215317	2450.18	2268.68	2328.95	2153.44	1965.88	2024.54	1661.35	BMP4	no
gene1195	248.569	0.590971	0.288749	2.04666	0.0406913	0.0747472	205.398	300.357	417.037	240.764	213.683	155.92	206.821	RFX5	no
gene11951	332.371	-0.769485	0.224707	-3.42439	0.000616189	0.00209272	259.273	234.299	217.481	328.597	405.998	407.977	472.976	CDKN3	no
gene11952	3128.64	-0.494937	0.21702	-2.2806	0.0225719	0.0451861	2234.68	2262.49	3110.45	3051.4	3539.37	3364.8	4337.31	CNIH1	no
gene11953	2437.52	-0.640335	0.252938	-2.53159	0.0113547	0.0252328	1406.36	1634.94	2502.22	2429.34	3053.72	2478.56	3557.49	GMFB	no
gene11954	461.513	-1.02603	0.240194	-4.27166	1.94e-05	0.000106171	316.515	248.75	304.712	459.829	627.451	529.966	743.369	CGRRF1	down
gene11956	1273.73	-0.365411	0.20687	-1.76637	0.077333	0.128734	910.26	1138.47	1231.99	1325.75	1680.32	1310.37	1318.91	SAMD4A	no
gene11957	241.551	-0.759622	0.219408	-3.46215	0.000535874	0.00185758	178.46	157.92	182.827	321.363	269.046	280.333	300.908	GCH1	no
gene11958	785.946	-0.656338	0.206743	-3.17465	0.00150018	0.0044958	528.647	666.773	578.355	934.124	808.11	886.24	1099.37	WDHD1	no
gene11959	2006.18	-0.534456	0.248514	-2.15061	0.031507	0.0600568	1264.94	1490.43	2036.19	1951.95	2067.87	2129.56	3102.32	SOCS4	no
gene1196	3457.41	1.88779	0.259176	7.28381	3.25e-13	2.42e-11	6761.29	4908.93	6120.53	1959.18	1796.88	976.722	1678.3	SELENBP1	up
gene11960	3702.34	-0.273597	0.199931	-1.36846	0.171167	0.249103	3212.29	3471.14	3239.51	4528.02	3168.33	4502.29	3794.83	MAPK1IP1L	no
gene11962	13308.1	1.02306	0.269192	3.80048	0.000144418	0.000602623	22813.7	13243.6	20193.4	7984.49	12519.9	6628.62	9773.14	LGALS3	up
gene11963	936.885	-1.07851	0.225544	-4.78183	1.74e-06	1.32e-05	580.277	592.458	546.091	966.157	1160.69	1117.29	1595.23	DLGAP5	down
gene11964	877.239	-0.133412	0.209734	-0.636099	0.524712	0.618883	666.701	832.95	994.197	956.857	854.732	858.772	976.466	FBXO34	no
gene11966	929.144	-0.512635	0.190754	-2.68741	0.00720091	0.0171881	753.125	661.612	826.904	1044.69	966.429	1103.56	1147.69	ATG14	no
gene11967	2.64675	-1.26768	1.39977	-0.90563	0.365132	0.463879	3.36718	1.03216	0	3.09997	1.94257	4.84725	4.23814	TBPL2	no
gene11970	15120.6	-0.781113	0.22234	-3.51315	0.000442827	0.00157626	11850.2	10236.9	10072.2	13545.8	18270.9	18372.7	23495.4	KTN1	no
gene11971	11.3901	-1.92302	0.747034	-2.5742	0.0100472	0.0227139	3.36718	7.22509	2.3899	24.7998	15.5406	14.5418	11.8668	LOC105615734	no
gene11974	1580.05	-1.34501	0.226528	-5.9375	2.89e-09	5.54e-08	796.899	1025.96	697.85	1633.68	2374.79	2312.95	2218.24	PELI2	down
gene11975	2396.51	-0.519541	0.17854	-2.90994	0.00361495	0.00950716	1863.17	1777.37	2122.23	2582.27	2615.67	2874.42	2940.42	TMEM260	no
gene11978	3905.54	-0.592461	0.236192	-2.50838	0.0121285	0.0266714	2568.03	2694.96	3819.06	4071.29	3896.8	4321.33	5967.3	EXOC5	no
gene11979	2018.82	-0.897443	0.234408	-3.82856	0.000128896	0.000547746	1092.09	1239.62	1725.51	2146.21	2305.83	2477.75	3144.7	AP5M1	no
gene11980	10.2001	-1.15776	0.783381	-1.4779	0.139435	0.210445	11.2239	2.06431	4.77979	9.29991	10.6841	11.3103	22.0383	LOC106991261	no
gene11981	1362.24	-0.0689061	0.22837	-0.30173	0.762858	0.821257	1260.45	1077.57	1638.27	1249.29	1286.95	1281.29	1741.87	NAA30	no
gene11982	13.0124	-3.28043	0.866074	-3.7877	0.00015205	0.000630773	2.24478	4.12862	0	12.3999	17.4831	22.6205	32.2098	C7H14orf105	down
gene11983	5.37544	-1.54627	1.05578	-1.46457	0.143037	0.214914	2.24478	3.09647	2.3899	2.06665	3.88514	12.926	11.0192	SLC35F4	no
gene11985	1697.21	-0.18076	0.208812	-0.86566	0.386677	0.486404	1515.23	1397.54	1818.71	1532.42	1702.66	1732.09	2181.79	C7H14orf37	no
gene11988	2616.18	-0.582177	0.190672	-3.05329	0.00226351	0.00638712	2158.36	1961.1	1993.17	2704.21	2864.32	2974.6	3657.51	ACTR10	no
gene1199	5283.9	-0.18051	0.256991	-0.702397	0.482432	0.579895	6462.74	3631.13	4636.4	4887.62	5066.23	4808.48	7494.72	PSMB4	no
gene11990	4259.32	-0.862202	0.275408	-3.13064	0.00174428	0.00512483	3800.42	2458.6	2449.64	3608.36	5083.71	4907.04	7507.43	PSMA3	no
gene11991	4221.01	-0.744846	0.238258	-3.12622	0.00177067	0.00518468	3993.47	2528.78	2613.35	4039.26	5088.57	5115.47	6168.18	ARID4A	no
gene11992	565.047	-0.245298	0.184654	-1.32842	0.18404	0.264438	530.892	519.175	482.759	597.261	576.944	625.296	623.006	TIMM9	no
gene11993	827.22	-1.1618	0.238734	-4.86651	1.14e-06	9.18e-06	383.858	620.326	449.301	919.657	998.482	1106.79	1312.13	KIAA0586	down
gene11994	362.328	0.695578	0.274114	2.53755	0.0111632	0.0248731	393.96	484.081	512.633	253.164	422.509	216.511	253.441	DACT1	no
gene11996	2.16371	-3.12398	2.15762	-1.44789	0.147649	0.220641	0	0	1.19495	0	9.71286	0	4.23814	LOC105612775	no
gene11998	5055.78	-0.617926	0.192011	-3.21819	0.00129004	0.00394162	4229.17	3578.49	3810.69	5190.38	5366.35	6391.1	6824.25	DAAM1	no
gene11999	40.4338	-0.844383	0.463989	-1.81983	0.0687844	0.116792	22.4478	47.4792	13.1444	48.5662	41.7653	63.0143	46.6195	GPR135	no
gene12	2219.58	0.385506	0.227764	1.69257	0.0905376	0.147142	2753.23	2734.18	2201.1	2507.87	1622.05	2117.44	1601.17	FARP2	no
gene120	4626.51	1.06075	0.2242	4.73127	2.23e-06	1.64e-05	7335.96	5114.33	7307.11	2890.2	3498.57	2549.66	3689.72	EFHD1	up
gene1200	1088.73	-0.190241	0.212202	-0.896507	0.369982	0.468736	846.284	1258.2	917.721	1163.52	1199.54	1209.39	1026.48	POGZ	no
gene12000	265.766	0.0300678	0.231603	0.129824	0.896705	0.925275	246.926	228.107	332.196	246.964	277.788	252.057	276.326	L3HYPDH	no
gene12001	1214	-1.21412	0.200554	-6.05383	1.41e-09	3.06e-08	697.006	757.603	621.373	1340.22	1549.2	1729.66	1802.9	JKAMP	down
gene12002	108.49	-1.49241	0.474698	-3.14392	0.00166701	0.00492328	50.5077	98.0548	10.7545	132.265	146.664	173.693	147.487	CCDC175	down
gene12003	455.106	-0.0952065	0.237025	-0.401673	0.687925	0.760802	393.96	561.493	358.485	414.362	429.308	534.814	493.319	RTN1	no
gene12006	112.173	-1.20032	0.349541	-3.43398	0.000594785	0.00203172	53.8748	95.9905	43.0181	104.366	143.75	153.496	190.716	LOC101117591	down
gene12007	1672.73	-1.2636	0.241051	-5.24204	1.59e-07	1.71e-06	750.881	1261.29	774.327	1854.81	2279.61	2274.98	2513.21	PCNXL4	down
gene12008	1277.88	0.294491	0.24239	1.21494	0.224387	0.311726	1592.67	1206.59	1486.52	975.457	1595.82	939.559	1148.53	DHRS7	no
gene12011	2467.26	-0.425248	0.211416	-2.01142	0.0442809	0.0803399	1919.29	1909.49	2361.22	2247.48	2767.19	2658.72	3407.46	PPM1A	no
gene12012	2.4786	-4.41124	1.83269	-2.40697	0.0160854	0.0338493	0	0	0	1.03332	2.91386	3.2315	10.1715	C7H14orf39	no
gene12014	2.57655	1.6243	1.42001	1.14386	0.25268	0.344261	5.61196	1.03216	5.97474	0	2.91386	0.807876	1.69525	SIX1	no
gene12018	16.3357	-0.681931	0.619473	-1.10082	0.270973	0.364739	5.61196	8.25725	22.704	22.7331	20.397	19.389	15.2573	SIX4	no
gene12019	1811.72	-1.61251	0.253137	-6.37009	1.89e-10	5.5e-09	1022.5	882.494	592.694	1906.48	2445.7	2695.07	3137.07	MNAT1	down
gene1202	749.042	0.958612	0.204907	4.67828	2.89e-06	2.06e-05	1110.05	891.783	1107.72	617.927	497.298	471.799	546.72	CGN	no
gene12021	216.539	0.0486531	0.241501	0.201461	0.840338	0.882827	202.031	185.788	274.838	213.898	192.315	219.742	227.164	TRMT5	no
gene12022	441.509	-0.733248	0.201324	-3.64214	0.000270382	0.00103204	295.189	347.837	317.856	472.229	544.891	576.015	536.548	SLC38A6	no
gene12023	602.443	0.966833	0.236034	4.09616	4.2e-05	0.000206883	784.552	708.059	1014.51	408.163	447.763	334.461	519.595	TMEM30B	no
gene12024	5012.45	-1.03174	0.20402	-5.05705	4.26e-07	3.94e-06	2926.08	3600.16	2890.58	5695.68	5483.88	7464.77	7025.98	PRKCH	down
gene12026	3168.86	-0.0979937	0.254824	-0.384555	0.700567	0.770696	2213.36	2882.81	4043.71	3111.34	3159.59	2610.25	4161	HIF1A	no
gene12027	493.103	-0.880067	0.219832	-4.00336	6.24e-05	0.000292113	347.942	330.29	321.441	467.062	626.479	693.965	664.54	SNAPC1	no
gene12028	238.862	1.38239	0.250857	5.51067	3.57e-08	4.74e-07	365.9	346.804	393.138	147.765	162.205	98.5608	157.659	LOC101118878	up
gene12029	3.95757	-0.454231	1.2818	-0.354371	0.723061	0.789096	0	6.19294	3.58485	5.16661	0.971286	1.61575	10.1715	SYT16	no
gene1203	3281.01	0.201539	0.189039	1.06612	0.286369	0.381468	3437.89	3429.86	3767.67	3538.1	2634.13	3278.36	2881.08	TUFT1	no
gene12031	681.71	-0.0981033	0.223341	-0.439254	0.660477	0.736915	547.728	602.779	816.15	631.36	673.101	677.808	823.046	KCNH5	no
gene12033	805.498	-0.332895	0.228951	-1.454	0.145947	0.218518	508.444	767.924	828.099	796.692	997.511	851.501	888.313	RHOJ	no
gene12036	4103.99	-0.814138	0.229314	-3.55031	0.000384772	0.00139992	3173	2677.41	2740.02	3716.86	4874.88	4905.42	6640.31	PPP2R5E	no
gene12038	590.78	-1.07761	0.258715	-4.16525	3.11e-05	0.000159277	448.957	358.158	277.228	580.727	686.699	803.836	979.857	WDR89	down
gene12039	1210.66	-0.147925	0.248691	-0.594814	0.551968	0.643047	986.583	972.291	1462.62	1027.12	1307.35	1079.32	1639.31	SGPP1	no
gene12040	13260.7	-0.437394	0.190859	-2.29171	0.0219224	0.0440612	10186.8	12207.3	10692.4	12757.4	14542.1	17459	14980.1	SYNE2	no
gene12043	56.762	-0.704059	0.400169	-1.7594	0.0785092	0.130379	38.1613	38.1898	48.9929	74.3993	69.9326	92.9057	34.7527	ESR2	no
gene12044	4.52897	-0.337099	1.18793	-0.283769	0.776587	0.83201	5.61196	6.19294	0	3.09997	0.971286	5.65513	10.1715	LOC105607025	no
gene12045	252.954	0.401542	0.27112	1.48105	0.138594	0.209378	204.275	398.412	278.423	211.831	201.056	252.057	224.621	MTHFD1	no
gene12046	684.353	-1.11263	0.261448	-4.25564	2.08e-05	0.000112768	387.225	561.493	284.398	763.626	837.248	1064.78	891.704	ZBTB25	down
gene12049	1931.72	-0.684237	0.254913	-2.6842	0.00727034	0.0173248	974.237	1454.31	1874.87	1977.78	2233.96	2137.64	2869.22	ZBTB1	no
gene12050	3149.86	1.68845	0.320353	5.27058	1.36e-07	1.5e-06	5935.21	3619.77	6041.66	1402.22	2300.01	834.536	1915.64	HSPA2	up
gene12051	500.087	-1.23617	0.304079	-4.0653	4.8e-05	0.000232317	316.515	362.287	166.098	560.061	742.062	862.811	490.776	PPP1R36	down
gene12052	1502.48	-0.0585253	0.252119	-0.232134	0.816434	0.864245	1177.39	1740.22	1485.32	1978.81	1167.49	1728.05	1240.08	PLEKHG3	no
gene12053	368.58	1.43381	0.272295	5.26567	1.4e-07	1.54e-06	545.483	457.245	724.139	270.731	238.936	150.265	193.259	SPTB	up
gene12054	3602.45	-0.762946	0.251421	-3.03454	0.00240902	0.00672341	2694.86	1987.93	3047.12	3362.43	3903.6	4227.61	5993.57	CHURC1	no
gene12055	2771.51	1.0639	0.387277	2.74712	0.00601213	0.0147219	6091.22	1929.1	3825.03	1825.88	2831.3	862.003	2036	GPX2	no
gene12056	1014.82	1.32891	0.323215	4.11153	3.93e-05	0.000195157	2323.35	886.622	1430.35	637.56	810.052	407.169	608.596	LOC105615749	up
gene12057	236.21	0.559083	0.279031	2.00366	0.0451067	0.0816044	329.983	210.56	327.416	257.297	161.233	207.624	159.354	LOC101110847	no
gene12058	845.73	-0.102724	0.189338	-0.54254	0.587447	0.674274	866.487	864.947	702.63	918.624	878.042	877.353	812.027	FNTB	no
gene1206	40.014	-1.5923	0.416323	-3.82466	0.000130952	0.000554275	16.8359	18.5788	20.3141	76.4659	50.5069	53.3198	44.0766	LOC105613572	down
gene12060	675.88	0.305629	0.18973	1.61086	0.107209	0.169356	808.123	695.673	771.937	638.594	666.302	562.282	588.253	MAX	no
gene12062	1154.91	-1.05866	0.247022	-4.2857	1.82e-05	0.000100519	730.677	668.837	740.868	1048.82	2018.33	1309.57	1567.26	FUT8	down
gene12069	3734.18	-1.6212	0.254808	-6.36245	1.99e-10	5.75e-09	1918.17	2029.22	1175.83	3852.23	5074.97	6150.36	5938.48	GPHN	down
gene1207	13182.3	-1.00967	0.292712	-3.44935	0.000561938	0.00193226	10986	6420.01	7638.11	10174.1	17978.5	15257.5	23821.7	SNX27	down
gene12071	6.47983	-0.265792	0.898004	-0.295981	0.767245	0.825046	4.48957	9.28941	3.58485	3.09997	10.6841	4.03938	10.1715	FAM71D	no
gene12072	2366.19	-0.579743	0.205354	-2.82313	0.00475566	0.0120334	1634.2	1808.34	2092.35	2369.41	2704.06	2594.09	3360.84	MPP5	no
gene12073	125.186	-1.5974	0.328212	-4.86697	1.13e-06	9.17e-06	49.3853	84.6368	39.4333	219.064	141.808	181.772	160.202	ATP6V1D	down
gene12074	661.75	-1.40036	0.253637	-5.52111	3.37e-08	4.5e-07	379.369	401.509	243.77	772.926	738.177	1061.55	1034.95	EIF2S1	down
gene12075	614.253	0.740583	0.226687	3.26698	0.00108701	0.00339691	910.26	647.162	834.074	473.262	493.413	381.317	560.282	PLEK2	no
gene12077	5035.32	1.55124	0.231341	6.70542	2.01e-11	7.87e-10	9432.59	5647.96	9144.94	3101	2745.83	2338.8	2836.16	TMEM229B	up
gene12078	241.993	0.295832	0.254045	1.16449	0.244227	0.334477	322.127	227.074	262.889	261.431	175.803	248.826	195.802	PLEKHH1	no
gene12079	220.219	-0.179106	0.282228	-0.634613	0.525681	0.619751	264.885	130.052	219.871	212.865	211.74	269.023	233.097	PIGH	no
gene12080	518.907	-0.75237	0.207969	-3.6177	0.000297237	0.00111955	309.78	406.67	402.698	599.327	574.03	677	662.844	ARG2	no
gene12081	1428.88	0.68668	0.25553	2.68728	0.00720373	0.0171924	2142.65	1348	1980.03	1037.46	1249.07	818.378	1426.56	VTI1B	no
gene12082	1194.99	0.325732	0.227575	1.43132	0.15234	0.226365	1489.41	1101.31	1462.62	1115.99	945.061	894.318	1356.2	RDH11	no
gene12084	2748.92	0.224135	0.31059	0.721643	0.470514	0.56913	4494.06	1491.47	3000.52	2404.54	2303.89	2492.3	3055.7	RDH12	no
gene12085	1759.42	0.0458175	0.22257	0.205857	0.836903	0.880354	1750.93	1732.99	1890.41	2095.58	1335.52	2022.11	1488.43	ZFYVE26	no
gene12087	3429.32	-1.79558	0.265862	-6.75379	1.44e-11	5.95e-10	1827.25	1410.96	1026.46	3550.5	4732.1	4897.34	6560.63	RAD51B	down
gene1209	12.0087	1.32783	0.651624	2.03773	0.0415773	0.0761537	19.0807	15.4823	20.3141	9.29991	6.799	9.69451	3.39051	CELF3	no
gene12097	1675.53	1.00493	0.244231	4.11467	3.88e-05	0.000193147	1706.04	2317.19	3023.22	1451.82	1143.2	1026	1061.23	ZFP36L1	up
gene12098	5424.18	1.32794	0.214683	6.18559	6.19e-10	1.52e-08	8245.09	7614.22	8938.22	3890.46	3842.41	2694.27	2744.62	ACTN1	up
gene121	233.961	0.362116	0.25227	1.43543	0.151164	0.225049	217.744	271.457	314.271	247.998	229.223	185.811	171.221	ZSCAN20	no
gene1210	181.565	-1.00895	0.27682	-3.64478	0.000267621	0.00102287	144.789	117.666	82.4515	239.731	183.573	239.131	263.612	RIIAD1	down
gene12100	1827.75	0.069442	0.173853	0.399428	0.689578	0.761989	1711.65	1933.23	1989.59	1854.81	1813.39	1803.99	1687.63	DCAF5	no
gene12101	190.081	-0.193348	0.299734	-0.645066	0.518884	0.613321	106.627	219.849	200.751	162.232	184.544	230.245	226.316	EXD2	no
gene12102	419.439	0.363332	0.248544	1.46184	0.143785	0.215772	395.082	533.625	512.633	386.463	462.332	378.086	267.85	GALNT16	no
gene12104	496.768	-0.607184	0.222463	-2.72937	0.00634559	0.0154242	469.16	359.19	319.051	522.861	541.978	627.719	637.416	ERH	no
gene12105	1275.42	0.277574	0.204445	1.3577	0.17456	0.252981	1199.84	1350.06	1701.61	1268.92	1147.09	1037.31	1223.13	SLC39A9	no
gene12106	60.8862	-0.0115299	0.357385	-0.032262	0.974263	0.982421	44.8957	80.5082	56.1626	76.4659	48.5643	67.0537	52.5529	PLEKHD1	no
gene12108	1379.86	-0.91806	0.271171	-3.38554	0.000710373	0.00236789	719.454	1186.98	837.659	2142.08	1251.02	2119.87	1401.98	SUSD6	no
gene1211	963.731	-0.135716	0.232796	-0.582983	0.559905	0.650179	1156.06	741.088	840.049	903.124	1000.42	881.392	1223.97	MRPL9	no
gene12110	4638.39	-0.782501	0.254151	-3.07889	0.00207775	0.00594837	3166.27	4029.54	2662.35	6348.74	4252.29	7417.11	4592.44	SRSF5	no
gene12111	447.869	-1.55866	0.334812	-4.65534	3.23e-06	2.27e-05	219.989	311.711	103.961	570.394	500.212	849.885	578.929	SLC10A1	down
gene12113	189.201	0.187024	0.232765	0.803488	0.421693	0.521609	197.541	203.335	209.116	177.732	173.86	154.304	208.516	SMOC1	no
gene12114	13.708	-0.632256	0.657336	-0.961846	0.336127	0.433728	4.48957	11.3537	15.5343	13.4332	13.598	12.1181	25.4288	SLC8A3	no
gene12116	933.582	-0.125428	0.210436	-0.596039	0.551149	0.642363	699.25	892.815	1070.67	1019.89	911.066	941.175	1000.2	SYNJ2BP	no
gene12117	993.293	-0.963787	0.239207	-4.02909	5.6e-05	0.000265456	732.922	583.168	615.399	865.925	1327.75	1287.75	1540.14	LOC101121607	no
gene1212	5.08525	-0.377935	1.09176	-0.346169	0.729216	0.794191	1.12239	8.25725	3.58485	9.29991	1.94257	9.69451	1.69525	OAZ3	no
gene12122	5.71348	-1.57017	1.08051	-1.45318	0.146175	0.218801	2.24478	0	5.97474	8.26658	2.91386	12.1181	8.47627	LOC101101897	no
gene12125	16.8426	-1.03621	0.572193	-1.81094	0.0701495	0.118568	7.85675	8.25725	15.5343	27.8997	19.4257	18.5811	20.3431	LOC101102399	no
gene12126	1231.4	-1.05025	0.23236	-4.51994	6.19e-06	3.95e-05	921.484	806.114	564.016	1380.52	1422.93	1665.03	1859.69	MED6	down
gene12128	1362.32	-0.109805	0.23752	-0.462298	0.643867	0.723127	1437.78	1269.55	1203.31	1413.59	952.831	1738.55	1520.64	TTC9	no
gene12129	986.483	-0.44302	0.279056	-1.58757	0.112384	0.17605	657.722	1045.57	751.623	1370.19	686.699	1328.96	1064.62	MAP3K9	no
gene1213	34.7213	1.4927	0.47782	3.12397	0.0017843	0.00521832	33.6718	60.8972	70.502	18.5998	12.6267	14.5418	32.2098	TDRKH	up
gene12130	3055.14	-0.395072	0.190553	-2.0733	0.0381447	0.0706983	2125.81	2801.27	2840.39	3172.3	3339.28	3522.34	3584.62	PCNX	no
gene12131	3693.06	-1.09222	0.21767	-5.01779	5.23e-07	4.74e-06	2057.35	2674.32	1995.56	3766.46	4985.61	5724.61	4647.54	SIPA1L1	down
gene12133	544.002	-1.65722	0.333905	-4.96314	6.94e-07	6e-06	243.559	373.641	113.52	802.892	925.635	736.783	611.987	RGS6	down
gene12137	309.309	-0.953339	0.296237	-3.21817	0.00129013	0.00394162	276.109	215.721	112.325	374.063	400.17	444.332	342.441	DPF3	no
gene12139	710.748	-0.180539	0.253594	-0.711923	0.476512	0.5748	666.701	873.204	440.936	733.659	669.216	747.285	844.237	DCAF4	no
gene1214	9.10349	0.578506	0.697606	0.829274	0.40695	0.507073	13.4687	8.25725	11.9495	8.26658	7.77029	8.07876	5.93339	LINGO4	no
gene12140	1040.36	-0.0177965	0.204432	-0.0870534	0.930629	0.950359	1009.03	1084.8	1004.95	1241.02	921.75	1132.64	888.313	ZFYVE1	no
gene12141	6631.81	-0.818013	0.212673	-3.84634	0.000119897	0.000514618	5701.75	4576.58	3576.48	7405.83	7766.4	9013.47	8382.18	RBM25	no
gene12143	2060.79	-0.460552	0.184182	-2.50053	0.0124009	0.0271622	1574.72	1627.71	1886.82	2226.81	2203.85	2266.09	2639.51	PSEN1	no
gene12145	1835.76	0.977498	0.247529	3.94903	7.85e-05	0.00035592	2542.22	2699.09	2419.77	1895.11	1124.75	1147.99	1021.39	PAPLN	no
gene12146	4644.57	-0.48998	0.184277	-2.65893	0.00783894	0.0184332	3786.95	4149.27	3381.7	5286.48	4764.16	5984.74	5158.66	NUMB	no
gene12148	383.452	-0.439448	0.201953	-2.17599	0.029556	0.0568961	343.452	305.518	307.102	386.463	439.021	433.021	469.585	HEATR4	no
gene1215	1390.71	0.0168558	0.232083	0.0726282	0.942102	0.958583	1833.99	1227.23	1138.79	1516.92	1144.17	1387.12	1486.74	RORC	no
gene12150	29.4523	0.555853	0.441483	1.25906	0.208008	0.29244	37.039	26.8361	44.2131	33.0663	19.4257	21.0048	24.5812	LOC101104407	no
gene12151	96.7497	-0.236313	0.315639	-0.748681	0.454049	0.553679	108.872	66.058	88.4262	129.165	101.985	75.9403	106.801	LOC101103726	no
gene12152	23.0911	-1.43699	0.55578	-2.58553	0.00972284	0.0220949	6.73435	9.28941	19.1192	45.4662	32.0524	21.0048	27.9717	LOC101104669	no
gene12153	95.7865	0.57868	0.308228	1.87744	0.0604573	0.104807	143.666	107.344	102.766	102.299	82.5593	58.9749	72.8959	LOC106990150	no
gene12154	101.269	0.0421151	0.338161	0.124542	0.900887	0.928623	142.544	65.0258	101.571	113.666	70.9039	105.832	109.344	LOC101103981	no
gene12156	98.3407	-0.535441	0.300456	-1.7821	0.0747334	0.125178	61.7316	101.151	71.6969	95.0657	117.526	110.679	130.535	DNAL1	no
gene12157	32.357	-0.276217	0.421308	-0.655617	0.51207	0.607072	23.5702	33.029	29.8737	45.4662	31.0811	36.3544	27.1241	PNMA1	no
gene12158	837.837	0.0912778	0.238573	0.382598	0.702018	0.771937	692.516	1014.61	897.406	949.624	715.838	954.909	639.958	ELMSAN1	no
gene12159	773.897	-0.236123	0.221543	-1.06581	0.286508	0.381534	760.982	543.946	803.005	749.159	969.343	761.019	829.827	PTGR2	no
gene1216	9.40067	0.685639	0.743919	0.921658	0.356707	0.454929	19.0807	7.22509	9.55959	10.3332	9.71286	5.65513	4.23814	C2CD4D	no
gene12160	2333.65	-0.746749	0.205593	-3.63218	0.000281042	0.00106725	1658.9	1762.92	1623.94	3395.5	2255.33	3037.61	2601.37	ZNF410	no
gene12161	163.697	0.900418	0.260177	3.46079	0.000538583	0.00186546	187.44	200.238	280.813	134.332	107.813	111.487	123.754	FAM161B	no
gene12162	374.937	0.152484	0.217377	0.701472	0.483008	0.580274	438.855	402.541	351.315	418.496	353.548	354.657	305.146	COQ6	no
gene12163	369.849	-0.245155	0.259967	-0.943024	0.345669	0.443997	235.702	360.223	407.477	436.062	377.83	458.873	312.774	ENTPD5	no
gene12164	33.1573	-0.992963	0.455053	-2.18208	0.0291033	0.0561194	28.0598	16.5145	19.1192	24.7998	46.6217	44.4332	52.5529	BBOF1	no
gene12165	285.739	0.309407	0.372565	0.830479	0.406268	0.506502	136.932	289.004	537.727	323.43	209.798	262.56	240.726	ALDH6A1	no
gene12166	862.516	-1.08581	0.224204	-4.84297	1.28e-06	1.02e-05	475.894	646.13	454.08	937.224	1023.74	1239.28	1261.27	LIN52	down
gene12168	739.932	0.0417581	0.321405	0.129924	0.896627	0.925253	633.029	1119.89	503.073	1011.62	505.069	831.304	575.539	ABCD4	no
gene1217	415.105	0.274469	0.253492	1.08275	0.278919	0.373347	631.907	348.869	401.503	395.763	348.692	361.12	417.88	THEM5	no
gene12170	7.11845	-0.00810454	0.826847	-0.00980175	0.992179	0.994564	12.3463	4.12862	4.77979	7.23326	9.71286	4.84725	6.78102	SYNDIG1L	no
gene12171	5299.26	-0.0791897	0.245888	-0.322056	0.747411	0.809214	6517.73	3715.76	5168.15	4481.52	5907.36	4695.37	6608.95	NPC2	no
gene12172	136.12	0.00307849	0.311626	0.0098788	0.992118	0.994561	181.828	105.28	121.885	115.732	146.664	102.6	178.849	ISCA2	no
gene12173	1532.31	0.453518	0.238148	1.90435	0.0568644	0.0994515	1332.28	2102.5	1999.15	1650.22	1347.17	1131.03	1163.79	LTBP2	no
gene12174	866.177	-0.479636	0.250057	-1.9181	0.0550979	0.096802	526.402	871.14	722.944	1050.89	836.277	1238.47	817.113	AREL1	no
gene12177	1067.03	-1.03793	0.296247	-3.5036	0.00045901	0.00162709	973.114	529.496	495.904	923.791	1478.3	1305.53	1763.06	FCF1	down
gene12178	2528.89	0.0487544	0.178412	0.273269	0.784647	0.838486	2596.09	2680.51	2456.81	2478.94	2538.94	2757.28	2193.66	YLPM1	no
gene12179	25.744	-0.87271	0.553115	-1.57781	0.114609	0.179028	20.2031	7.22509	25.0939	42.3662	32.0524	37.1623	16.1049	PROX2	no
gene1218	299.935	-0.42874	0.225818	-1.89861	0.0576153	0.100574	263.762	228.107	259.304	393.696	330.237	349.81	274.631	THEM4	no
gene12180	2060.32	0.840978	0.200435	4.19577	2.72e-05	0.00014182	2542.22	2885.91	2839.2	1914.75	1393.8	1463.06	1383.33	DLST	no
gene12181	99.8743	0.0480418	0.358853	0.133876	0.893501	0.923082	63.9764	154.823	86.0363	126.065	95.186	100.984	72.0483	RPS6KL1	no
gene12182	218.36	0.752535	0.338721	2.2217	0.0263038	0.0513582	340.085	279.714	233.015	269.697	111.698	185.811	108.496	PGF	no
gene12183	1120.43	1.04836	0.23127	4.53307	5.81e-06	3.75e-05	1936.13	1376.9	1455.45	847.325	713.895	597.02	916.285	EIF2B2	up
gene12184	519.081	-0.668611	0.220365	-3.03411	0.00241246	0.00672969	452.324	328.226	384.773	546.628	598.312	737.591	585.71	MLH3	no
gene12185	133.34	-0.701248	0.271303	-2.58474	0.00974531	0.0221326	124.586	87.7333	82.4515	139.499	157.348	168.846	172.916	ACYP1	no
gene12186	84.3472	0.318887	0.324564	0.982507	0.32585	0.422925	77.4451	81.5403	126.665	58.8994	96.1573	75.1324	74.5912	ZC2HC1C	no
gene12187	1531.59	0.701704	0.232914	3.01272	0.00258917	0.00715149	1402.99	2129.34	2358.83	1427.02	1103.38	1102.75	1196.85	NEK9	no
gene12188	6839.69	0.151854	0.1917	0.792145	0.428276	0.528392	7373	6277.57	8111.31	6373.54	6260.91	5908.8	7572.7	TMED10	no
gene1219	5.78371	-1.69784	1.01293	-1.67617	0.093705	0.151308	1.12239	5.16078	1.19495	12.3999	5.82772	9.69451	5.08576	LOC105615685	no
gene12191	308.159	0.655946	0.323006	2.03076	0.0422798	0.0773079	207.643	354.03	607.034	242.831	233.109	231.052	281.412	FOS	no
gene12194	272.931	-0.292576	0.266623	-1.09734	0.272492	0.366553	254.783	283.843	186.412	273.831	396.285	275.486	239.878	JDP2	no
gene12195	29.8123	-0.209833	0.413335	-0.507657	0.611694	0.69506	26.9374	29.9325	25.0939	36.1663	30.1099	29.0835	31.3622	BATF	no
gene12196	120.843	-0.693452	0.369783	-1.87529	0.0607527	0.105192	61.7316	124.891	81.2565	167.398	82.5593	206.008	122.058	LOC101108756	no
gene12198	741.34	0.261644	0.393046	0.665681	0.505615	0.601253	1322.18	280.746	854.388	447.429	780.914	688.31	815.417	LOC101110417	no
gene122	67.1811	-1.17544	0.468772	-2.50748	0.0121595	0.0267259	37.039	60.8972	19.1192	41.3329	76.7316	96.1372	139.011	CSMD2	no
gene1220	11660	-0.153577	0.224266	-0.684798	0.493471	0.590095	13200.5	8622.63	11047.3	10880.9	15327.9	10938.6	11602.3	S100A10	no
gene12200	45.3472	1.5422	0.552699	2.79031	0.0052657	0.013147	83.057	22.7074	112.325	18.5998	15.5406	18.5811	46.6195	LOC105615770	no
gene12201	248.07	1.02668	0.305342	3.36241	0.000772657	0.002544	474.772	197.142	377.604	192.198	188.429	147.841	158.506	LOC101110679	up
gene12202	1781.43	-0.688707	0.207237	-3.32329	0.000889639	0.0028671	1328.91	1449.15	1181.8	1809.35	2133.92	2620.75	1946.15	TTLL5	no
gene12205	315.22	0.447299	0.24297	1.84097	0.0656266	0.112323	342.33	365.383	407.477	318.263	309.84	266.599	196.649	TGFB3	no
gene12206	815.225	-1.30958	0.287003	-4.56293	5.04e-06	3.33e-05	481.506	607.94	235.405	1094.29	1076.18	1158.49	1052.75	IFT43	down
gene12208	1605.89	-0.773546	0.257492	-3.00415	0.0026632	0.00732402	955.156	1456.37	1015.71	2696.97	1665.76	1900.12	1551.16	GPATCH2L	no
gene12210	78.7751	0.329072	0.339629	0.968916	0.332587	0.430135	58.3644	99.087	109.935	72.3326	86.4444	72.7088	52.5529	VASH1	no
gene12211	267.055	0.473483	0.210237	2.25214	0.0243137	0.0480598	350.186	303.454	299.932	241.798	218.539	235.092	220.383	ANGEL1	no
gene12212	2.4335	-1.18806	1.60505	-0.740198	0.45918	0.558422	0	4.12862	0	6.19994	0.971286	4.03938	1.69525	LRRC74A	no
gene12216	1304.13	1.64825	0.254145	6.48546	8.85e-11	2.82e-09	1981.02	1953.87	2468.76	812.192	855.703	457.258	600.12	IRF2BPL	up
gene12219	209.269	0.725103	0.332676	2.17961	0.0292867	0.0564349	150.401	290.036	370.434	210.798	112.669	172.885	157.659	CIPC	no
gene1222	7042.73	0.988335	0.292783	3.37565	0.000736409	0.00244101	12417	7044.47	10022	4577.62	6584.35	2906.74	5746.91	S100A11	no
gene12221	13.2937	0.788895	0.621869	1.26859	0.204588	0.288533	12.3463	17.5467	22.704	9.29991	10.6841	14.5418	5.93339	TMEM63C	no
gene12222	4.71555	0.644833	0.93951	0.686351	0.492492	0.589089	6.73435	5.16078	5.97474	3.09997	2.91386	4.03938	5.08576	NGB	no
gene12223	375.967	0.707544	0.218274	3.24155	0.00118882	0.00366815	493.853	477.888	476.784	351.33	271.96	316.687	243.269	POMT2	no
gene12224	337.211	0.718137	0.313248	2.29255	0.0218739	0.0439999	645.376	335.451	322.636	257.297	345.778	180.156	273.784	GSTZ1	no
gene12225	159.595	-0.561859	0.347851	-1.61523	0.106261	0.168158	74.0779	190.949	111.13	127.099	220.482	221.358	172.068	TMED8	no
gene12226	40.6718	-0.0498508	0.415434	-0.119997	0.904486	0.931	42.6509	25.8039	51.3828	32.033	50.5069	32.315	50.01	SAMD15	no
gene12227	8.60452	-1.43637	0.826908	-1.73703	0.0823812	0.135915	3.36718	7.22509	2.3899	11.3666	9.71286	19.389	6.78102	NOXRED1	no
gene12228	810.776	-0.0778215	0.198193	-0.392654	0.694575	0.765989	809.245	859.786	688.29	903.124	755.66	902.397	756.931	VIPAS39	no
gene12229	2140.13	0.405802	0.20138	2.01511	0.0438935	0.0797809	2825.06	2280.03	2361.22	1889.95	1965.88	1525.27	2133.48	AHSA1	no
gene12230	20.3505	-0.161405	0.516221	-0.312666	0.754534	0.815275	17.9583	23.7396	15.5343	14.4665	21.3683	29.8914	19.4954	ISM2	no
gene12231	2103.13	0.217849	0.196727	1.10737	0.268134	0.3618	1918.17	2254.23	2686.24	2180.31	1918.29	1835.49	1929.2	SPTLC2	no
gene12235	525.499	-0.460433	0.240504	-1.91445	0.0555626	0.0975082	401.816	541.882	353.705	578.661	496.327	570.36	735.74	ALKBH1	no
gene12236	2242.43	-0.880486	0.29881	-2.94664	0.00321242	0.0086128	2178.56	1170.47	1194.95	1802.12	3036.24	2552.08	3762.62	SLIRP	no
gene12237	3283.93	-0.547521	0.223911	-2.44526	0.0144749	0.030971	3243.71	2032.32	2520.15	3211.57	3725.85	3778.43	4475.47	SNW1	no
gene12238	202.117	-0.613081	0.298575	-2.05336	0.0400376	0.0736888	161.625	173.402	130.249	296.564	180.659	306.185	166.135	ADCK1	no
gene1224	45.0956	-0.936697	0.392961	-2.38369	0.0171399	0.035743	29.1822	21.6753	38.2384	65.0993	49.5356	67.8616	44.0766	LOC105613035	no
gene12241	338.841	-1.13818	0.821739	-1.38509	0.166026	0.242791	153.768	411.83	37.0434	387.496	226.31	428.174	727.264	NRXN3	no
gene12246	1783.78	0.477868	0.234325	2.03934	0.041416	0.075899	2340.19	1489.4	2550.02	1483.85	1626.9	1694.12	1301.96	DIO2	no
gene1225	5253.1	0.217303	0.294584	0.737661	0.46072	0.559699	3935.11	4876.94	8315.65	7011.1	4521.34	4138.75	3972.83	TCHHL1	no
gene12250	772.605	-1.31653	0.281968	-4.66907	3.03e-06	2.14e-05	382.736	569.75	298.737	704.726	1090.75	1067.2	1294.33	CEP128	down
gene12253	80.2121	-0.494184	0.410818	-1.20293	0.229005	0.317135	79.6899	87.7333	27.4838	82.6658	63.1336	95.3293	125.449	TSHR	no
gene12254	1988.42	-0.458437	0.203674	-2.25084	0.0243956	0.0482057	1497.27	1481.14	1937.01	2079.05	2040.67	2227.31	2656.46	GTF2A1	no
gene12255	1900.19	-0.581614	0.241514	-2.4082	0.0160315	0.0337651	1020.25	1693.77	1726.7	2367.34	1858.07	2576.32	2058.89	STON2	no
gene12256	845.661	0.176792	0.29616	0.596948	0.550542	0.641824	489.363	998.095	1228.41	995.09	722.637	720.625	765.407	SEL1L	no
gene1226	224726	0.439676	0.274881	1.59951	0.109707	0.172696	319810	209003	264445	175882	154680	151757	297506	LOC101120969	no
gene12263	4326.33	-0.873171	0.210476	-4.14856	3.35e-05	0.000169871	2958.63	3178.01	2661.15	4153.96	6175.44	6136.62	5020.5	FLRT2	no
gene12264	549.335	0.350764	0.266525	1.31606	0.188152	0.269296	453.447	530.528	896.211	449.495	576.944	474.223	464.5	GALC	no
gene12266	14.2845	-1.26886	0.654625	-1.9383	0.0525862	0.0930104	4.48957	6.19294	13.1444	20.6665	24.2821	20.1969	11.0192	GPR65	no
gene12268	44.0819	-1.53047	0.507751	-3.01422	0.00257641	0.00712083	11.2239	42.3184	9.55959	74.3993	63.1336	63.0143	44.9242	KCNK10	down
gene12269	739.35	-1.13929	0.268984	-4.23553	2.28e-05	0.000121767	376.001	637.873	299.932	1022.99	868.33	1059.13	911.199	SPATA7	down
gene1227	483.145	-1.8594	0.421727	-4.40902	1.04e-05	6.21e-05	185.195	214.688	179.242	1312.32	223.396	758.595	508.576	RPTN	down
gene12270	2541	0.256719	0.180704	1.42066	0.155416	0.229957	2459.16	3027.31	2919.26	2541.97	2252.41	2370.31	2216.54	PTPN21	no
gene12271	1592.63	-0.299579	0.175127	-1.71064	0.0871474	0.142509	1432.17	1293.29	1496.08	1707.05	1702.66	1664.22	1852.91	ZC3H14	no
gene12272	1236.38	-1.09268	0.194435	-5.61976	1.91e-08	2.8e-07	691.394	790.632	769.547	1630.58	1712.38	1735.32	1324.84	EML5	down
gene12274	559.151	-0.427988	0.25846	-1.65592	0.0977387	0.156594	414.163	649.226	336.975	550.761	717.78	620.449	624.701	TTC8	no
gene12276	4265.07	-1.37181	0.25013	-5.48438	4.15e-08	5.41e-07	2468.14	2798.18	1441.11	6656.67	5084.68	6094.61	5312.08	FOXN3	down
gene12278	1106.29	-1.0074	0.257867	-3.90665	9.36e-05	0.000414794	967.502	689.48	446.911	1358.82	1353.97	1488.11	1439.27	EFCAB11	down
gene12279	487.885	-0.0843464	0.213701	-0.394693	0.693069	0.765106	493.853	482.017	438.546	621.027	469.131	459.681	450.938	TDP1	no
gene12281	3203.5	1.28202	0.261273	4.90681	9.26e-07	7.73e-06	6594.06	3544.42	4344.83	1807.28	2320.4	1515.57	2297.92	PSMC1	up
gene12282	640.675	0.600701	0.214075	2.80603	0.00501555	0.0126108	795.776	895.912	694.265	608.627	484.672	564.705	440.766	NRDE2	no
gene12284	12698.1	0.832932	0.251493	3.31195	0.000926467	0.00296455	20204.2	13912.4	16718.5	8832.84	12077	6408.88	10732.7	CALM1	no
gene12287	2090.96	-1.02439	0.324316	-3.15861	0.00158521	0.00471837	1371.56	1930.13	640.492	3394.47	2217.45	2923.7	2158.91	TTC7B	down
gene1229	8169.45	0.368233	0.378427	0.973063	0.330522	0.428046	11172.3	7570.87	9386.32	7342.79	4229.95	3637.06	13846.8	LOC105613042	no
gene12290	1590.24	-1.0264	0.249024	-4.12169	3.76e-05	0.000188217	802.511	1365.54	826.904	2430.38	1661.87	2005.96	2038.54	RPS6KA5	down
gene12291	2918.45	-0.072553	0.185262	-0.391624	0.695336	0.766717	2437.84	2894.17	3172.59	3244.63	2969.22	2923.7	2787	LOC101115969	no
gene12293	2464.47	-0.570073	0.193739	-2.94248	0.00325591	0.00871164	1704.91	1870.27	2215.43	2529.57	2808.96	2882.5	3239.63	CTDSPL2	no
gene12294	3915.78	0.184118	0.21991	0.837243	0.402456	0.502336	4859.96	3207.94	4543.19	3494.7	3798.7	3148.29	4357.65	EIF3J	no
gene12295	2169.1	0.148811	0.23143	0.643006	0.52022	0.614679	1949.6	2339.9	2603.79	2564.71	1703.64	2358.19	1663.89	SPG11	no
gene12296	40.1157	-0.3065	0.423753	-0.723299	0.469496	0.56806	47.1405	37.1576	21.5091	57.8661	33.0237	47.6647	36.448	PATL2	no
gene12298	18638.6	-0.399122	0.259027	-1.54085	0.123353	0.190339	15947	12170.2	19184.9	14648.4	26688	17743.4	24088.7	B2M	no
gene12299	6.41673	-1.85802	1.052	-1.76618	0.0773657	0.128755	5.61196	2.06431	0	10.3332	4.85643	16.9654	5.08576	TRIM69	no
gene12300	2.24366	-3.18896	1.79154	-1.78001	0.0750747	0.125681	1.12239	0	0	5.16661	2.91386	5.65513	0.847627	C7H15orf43	no
gene12302	107.997	-0.472184	0.324613	-1.45461	0.145778	0.218323	60.6092	129.02	75.2818	129.165	108.784	109.871	143.249	MB21D1	no
gene12303	378.196	-0.555586	0.217278	-2.55703	0.010557	0.0237034	257.028	354.03	283.203	425.729	422.509	490.381	414.49	MTO1	no
gene12304	24367.1	-0.158737	0.188884	-0.840392	0.400688	0.500312	23116.8	19654.3	25775	24382.3	25588.5	23184.4	28868.5	EEF1A1	no
gene12306	1578.2	-0.790894	0.180501	-4.38166	1.18e-05	6.89e-05	1104.43	1133.31	1102.94	1987.08	1904.69	2123.91	1691.02	SLC17A5	no
gene12307	1477.6	-0.443896	0.226437	-1.96035	0.049955	0.0890637	987.705	1159.11	1529.53	1885.81	1356.89	1606.86	1817.31	CD109	no
gene1231	6582.79	-0.010255	0.347623	-0.0295004	0.976466	0.98383	7456.05	5627.32	6585.36	4506.32	3849.21	5650.28	12405	LOC101120378	no
gene12313	5409.29	0.585117	0.256584	2.28041	0.0225834	0.0451985	4591.71	7541.97	7912.95	5956.07	4197.9	3785.71	3878.74	COL12A1	no
gene12314	892.509	-0.601512	0.297927	-2.01899	0.0434885	0.0791372	1014.64	487.178	565.211	707.826	1048.02	1110.02	1314.67	LOC101110066	no
gene12315	4127.51	-0.256277	0.217633	-1.17756	0.238972	0.328675	3514.21	3189.36	4441.62	3928.69	4340.68	3913.35	5564.67	TMEM30A	no
gene12316	2686.39	-0.64476	0.172436	-3.73912	0.000184667	0.00074389	2078.67	2105.6	1911.92	3004.9	3242.15	3444.78	3016.7	FILIP1	no
gene12317	6638.17	-1.0548	0.216502	-4.87201	1.1e-06	8.96e-06	3887.97	4299.96	4138.11	6183.4	8998.96	8581.26	10377.5	SENP6	down
gene1232	5962.68	-0.663351	0.338207	-1.96138	0.0498351	0.088917	6414.47	2851.85	4147.67	6684.57	4155.16	6145.51	11339.6	LOC105614079	no
gene12320	4405.33	-0.0606182	0.204891	-0.295857	0.76734	0.825096	4433.45	3382.38	5084.51	4619.99	4091.06	4919.16	4306.79	MYO6	no
gene12321	68.4661	-1.33769	0.357845	-3.73817	0.000185367	0.000746004	48.2629	35.0933	26.2889	92.9991	75.7603	121.181	79.677	IMPG1	down
gene12325	292.644	0.0915268	0.278172	0.32903	0.742133	0.805029	180.705	346.804	382.384	276.931	307.898	269.83	283.955	HTR1B	no
gene12327	166.141	-1.63818	0.409135	-4.00402	6.23e-05	0.000291435	46.0181	129.02	50.1878	197.365	363.261	138.955	238.183	MEI4	down
gene12328	383.705	-0.585509	0.240776	-2.43176	0.0150259	0.031958	363.655	290.036	241.38	373.03	475.93	409.593	532.31	IRAK1BP1	no
gene12329	6169.34	-1.01378	0.226651	-4.47288	7.72e-06	4.79e-05	4189.89	3978.96	3527.49	5821.74	7819.82	7547.98	10299.5	PHIP	down
gene1233	25312	0.548113	0.289952	1.89036	0.0587098	0.102234	26611.9	23989.4	42074.1	20677.8	14084.6	18961.7	30784.1	LOC101120628	no
gene12330	1470.24	-0.00610198	0.246887	-0.0247157	0.980282	0.986687	1801.44	1124.02	1474.57	1374.32	1934.8	1174.65	1407.91	HMGN3	no
gene12333	163.989	-0.938875	0.25762	-3.64441	0.000268003	0.00102364	97.6481	125.923	99.1807	177.732	188.429	214.895	244.117	LCA5	no
gene12334	992.156	-0.378203	0.272304	-1.3889	0.164864	0.24145	564.563	906.233	1070.67	1245.15	757.603	1198.08	1202.78	SH3BGRL2	no
gene12337	12558.2	0.483866	0.363419	1.33143	0.183048	0.263301	23031.5	5884.32	16086.4	8610.68	12473.3	8082.8	13738.3	ELOVL4	no
gene12338	593.208	-0.856515	0.220909	-3.87722	0.000105656	0.000461133	354.676	438.666	423.012	693.36	623.566	702.044	917.133	TTK	no
gene12339	2830.65	-0.662489	0.253078	-2.61773	0.0088518	0.0204025	2896.89	1620.49	1853.37	2667.01	3448.06	3218.58	4110.14	BCKDHB	no
gene1234	1312.74	1.24488	0.286604	4.34353	1.4e-05	8.03e-05	2571.4	1482.18	1827.08	619.994	1238.39	743.246	706.921	LOC101121219	up
gene12343	2348.51	-0.078361	0.246959	-0.317304	0.751013	0.812103	2417.63	1585.39	2824.86	2643.24	2846.84	2110.17	2011.42	FAM46A	no
gene12346	1747.93	-0.290558	0.194277	-1.49559	0.134762	0.204729	1379.42	1568.88	1702.8	1720.48	1922.17	1734.51	2207.22	IBTK	no
gene12348	650.602	0.689405	0.281934	2.44527	0.0144745	0.030971	1012.4	567.686	912.941	443.296	679.9	368.391	569.605	TPBG	no
gene12351	853.875	-1.58627	0.263235	-6.02605	1.68e-09	3.54e-08	454.569	477.888	261.694	1011.62	1078.13	1526.89	1166.33	UBE3D	down
gene12352	1044.73	-0.577477	0.205971	-2.80368	0.00505236	0.0126903	633.029	929.973	883.067	1194.52	1183.03	1206.16	1283.31	DOPEY1	no
gene12354	644.485	-0.826562	0.219228	-3.77033	0.000163035	0.000669683	438.855	511.949	389.553	886.591	756.632	887.855	639.958	PGM3	no
gene12355	67.0177	0.291003	0.310144	0.938283	0.348099	0.446415	77.4451	67.0902	80.0616	58.8994	60.2197	52.5119	72.8959	RWDD2A	no
gene12356	3025.45	0.0202119	0.251957	0.0802194	0.936063	0.954426	2412.02	2392.54	4344.83	3189.87	3353.85	2859.07	2625.95	ME1	no
gene12359	21.3349	0.268821	0.687521	0.391001	0.695797	0.766997	21.3255	12.3859	37.0434	41.3329	14.5693	4.03938	18.6478	PRSS35	no
gene12360	6.85284	-2.21358	0.963473	-2.2975	0.0215902	0.0435575	2.24478	2.06431	2.3899	6.19994	11.6554	6.46301	16.9525	SNAP91	no
gene12365	8.47982	0.239676	0.915514	0.261794	0.79348	0.845495	6.73435	18.5788	2.3899	5.16661	17.4831	6.46301	2.54288	SOGA3	no
gene12366	269.303	-1.43561	0.254547	-5.63988	1.7e-08	2.53e-07	126.83	175.467	106.35	329.63	423.481	389.396	333.965	KIAA0408	down
gene12367	5060.28	-0.739925	0.253403	-2.91995	0.00350089	0.0092599	2995.67	2764.11	5218.34	5666.74	6865.05	5333.6	6578.43	ECHDC1	no
gene12369	1137.74	-0.706567	0.202699	-3.4858	0.000490663	0.00172074	735.167	781.342	991.807	1285.45	1226.73	1433.17	1510.47	RNF146	no
gene12370	232.644	-0.451483	0.312219	-1.44605	0.148164	0.22133	246.926	195.078	135.029	169.465	229.223	307.801	344.984	RSPO3	no
gene12373	267.466	-0.304508	0.237251	-1.28348	0.199323	0.282317	253.661	219.849	234.21	264.531	256.419	270.638	372.956	CENPW	no
gene12374	616.619	-1.1237	0.2191	-5.1287	2.92e-07	2.86e-06	396.205	399.444	309.492	669.593	751.775	851.501	938.323	TRMT11	down
gene12375	508.368	-0.00704558	0.258573	-0.0272479	0.978262	0.985234	563.441	328.226	629.738	481.528	511.868	458.066	585.71	HINT3	no
gene12376	1120.64	-1.11564	0.192677	-5.79021	7.03e-09	1.17e-07	564.563	762.763	689.485	1445.62	1384.08	1518	1479.96	NCOA7	down
gene12379	222.772	-0.364571	0.254191	-1.43424	0.151504	0.225457	186.317	193.013	194.777	202.531	300.127	285.988	196.649	HEY2	no
gene1238	297.483	0.729948	0.341603	2.13683	0.0326118	0.0618455	428.754	403.573	322.636	139.499	156.377	239.939	391.604	LOC101121728	no
gene12381	579.178	-0.593528	0.231189	-2.56729	0.0102497	0.0230905	563.441	419.055	363.264	780.159	632.307	585.71	710.312	HDDC2	no
gene12382	415.124	-0.335127	0.25687	-1.30465	0.192011	0.273694	418.652	390.155	274.838	375.096	369.089	554.203	523.834	TPD52L1	no
gene12383	892.36	-1.69997	0.233525	-7.27961	3.35e-13	2.48e-11	365.9	494.403	310.687	1013.69	1345.23	1396.01	1320.6	RNF217	down
gene12385	133.786	-2.32932	0.447509	-5.20507	1.94e-07	2.02e-06	29.1822	77.4117	14.3394	173.598	291.386	144.61	205.973	NKAIN2	down
gene12386	95.0884	0.0311091	0.451474	0.0689056	0.945065	0.961311	116.729	76.3796	95.5959	49.5995	196.2	74.3246	56.791	TRDN	no
gene1239	359.401	1.63437	0.305839	5.34388	9.1e-08	1.06e-06	557.829	643.033	558.041	267.631	212.712	98.5608	178.002	LOC101121986	up
gene12390	27.6054	0.222777	0.585517	0.380479	0.70359	0.772996	25.815	54.7043	9.55959	12.3999	31.0811	27.4678	32.2098	CLVS2	no
gene12391	250.751	-0.18089	0.270572	-0.668546	0.503785	0.599619	189.684	214.688	295.152	239.731	212.712	349.002	254.288	SMPDL3A	no
gene12393	860.142	-1.05549	0.351832	-2.99997	0.00270004	0.0074146	835.06	282.811	479.174	644.794	1064.53	1281.29	1433.34	FABP7	down
gene12394	1748.65	-1.02729	0.293475	-3.50043	0.000464511	0.00164352	1238	734.895	1320.42	1964.35	1480.24	2311.33	3191.32	PKIB	down
gene12396	8456.83	-0.641452	0.237201	-2.70425	0.00684582	0.0164573	6072.14	5438.43	7711	7571.16	10309.2	9063.56	13032.3	SERINC1	no
gene12397	1093.19	-0.917455	0.199363	-4.60194	4.19e-06	2.83e-05	722.821	716.316	736.088	1152.16	1400.59	1290.99	1633.38	HSF2	no
gene12399	2.42413	-0.646626	1.56797	-0.412396	0.680049	0.75414	3.36718	2.06431	0	6.19994	2.91386	2.42363	0	LOC105615953	no
gene124	42.3111	-1.96936	0.44206	-4.45495	8.39e-06	5.15e-05	17.9583	16.5145	13.1444	37.1996	66.0474	61.3986	83.9151	LOC106990793	down
gene1240	210.602	2.69701	0.403526	6.68361	2.33e-11	8.92e-10	591.501	199.206	432.571	36.1663	61.191	48.4725	105.106	C1H1orf68	up
gene12401	47365.8	0.0954578	0.206094	0.463175	0.643239	0.722503	46415.4	43064.7	58013.6	50019	43609.8	37906.3	52531.7	GJA1	no
gene12402	680.928	-1.40255	0.26521	-5.28846	1.23e-07	1.38e-06	307.536	407.702	338.17	637.56	877.071	901.589	1296.87	TBC1D32	down
gene12403	998.101	1.45748	0.289265	5.03857	4.69e-07	4.3e-06	1847.46	1275.75	1579.72	503.228	792.569	334.461	653.521	LOC101122794	up
gene12405	302.734	-0.53402	0.371974	-1.43564	0.151105	0.225	98.7705	337.515	286.788	224.231	449.705	362.736	359.394	MAN1A1	no
gene12406	84.0319	-0.982108	0.331782	-2.9601	0.00307539	0.00829362	50.5077	68.1223	43.0181	76.4659	135.98	109.871	104.258	FAM184A	no
gene12407	989.61	-0.556098	0.196416	-2.83123	0.00463694	0.0117801	773.328	808.178	758.792	1019.89	1010.14	1247.36	1309.58	MCM9	no
gene1241	1383.17	0.815097	0.288216	2.82808	0.00468282	0.0118772	1871.03	1598.81	2038.58	1260.65	534.207	1230.39	1148.53	KPRP	no
gene12411	471.347	-1.04173	0.261093	-3.98986	6.61e-05	0.000306605	295.189	307.583	278.423	376.13	694.469	622.064	725.569	CEP85L	down
gene12416	351.455	-1.08157	0.322487	-3.35384	0.000796973	0.00261278	199.786	276.618	167.293	237.664	436.107	583.286	559.434	SLC35F1	down
gene12419	1304.62	-0.17045	0.211641	-0.805373	0.420604	0.520429	956.278	1262.33	1433.94	1298.89	1239.36	1406.51	1535.05	NUS1	no
gene12420	3.30132	-3.78772	1.75977	-2.1524	0.0313661	0.0598384	1.12239	0	0	6.19994	0	6.46301	9.3239	LOC101102818	no
gene12421	2365.77	-0.35121	0.183443	-1.91455	0.0555499	0.0974961	1814.91	2100.44	2216.63	2443.81	2404.9	2795.25	2784.46	GOPC	no
gene12422	2162.46	-0.0262958	0.177087	-0.14849	0.881956	0.913916	2016.94	2087.02	2315.81	2404.54	2153.34	2131.18	2028.37	DCBLD1	no
gene12423	24.122	-2.18895	0.624423	-3.50556	0.000455644	0.0016165	5.61196	14.4502	3.58485	22.7331	24.2821	37.1623	61.0292	ROS1	down
gene12426	6.67468	-0.239002	1.10481	-0.216328	0.828732	0.874087	6.73435	11.3537	0	1.03332	11.6554	3.2315	12.7144	RFX6	no
gene12428	98.3542	-1.19886	0.357363	-3.35473	0.000794416	0.00260639	57.242	69.1545	43.0181	79.5659	145.693	109.871	183.935	FAM162B	down
gene12429	226.404	-1.09001	0.319651	-3.40999	0.000649654	0.00219287	87.5466	179.595	145.784	203.565	259.333	302.146	406.861	KPNA5	down
gene1243	22.2286	1.08845	0.516927	2.10561	0.0352381	0.0660425	33.6718	24.7717	37.0434	24.7998	9.71286	13.7339	11.8668	LOC105605549	no
gene12430	811.392	-0.936601	0.217742	-4.30143	1.7e-05	9.45e-05	549.972	584.2	464.835	836.992	949.918	1047.81	1246.01	ZUFSP	no
gene12434	415.604	-0.882326	0.303628	-2.90594	0.00366147	0.0096103	401.816	187.852	252.134	347.197	523.523	554.203	642.501	RWDD1	no
gene12435	1256.62	-0.2838	0.224368	-1.26489	0.205912	0.29016	1282.89	841.207	1229.6	1517.95	1209.25	1505.88	1209.56	TRAPPC3L	no
gene12438	1506.82	-0.39827	0.190393	-2.09183	0.0364536	0.0679408	1132.49	1396.51	1296.52	1516.92	1767.74	1868.62	1568.96	DSE	no
gene12439	1012.53	1.23145	0.257797	4.77684	1.78e-06	1.35e-05	1368.2	1317.03	1835.44	590.027	729.436	433.021	814.57	TSPYL1	up
gene1244	509.542	1.93776	0.392659	4.93498	8.02e-07	6.81e-06	1288.51	418.023	939.23	320.33	154.434	129.26	317.013	LOC105613519	up
gene12440	1540.02	0.999621	0.245456	4.0725	4.65e-05	0.000226595	2028.16	1910.52	2528.51	1094.29	1216.05	713.354	1289.24	TSPYL4	no
gene12441	395.991	-0.286625	0.227862	-1.25789	0.208432	0.292964	307.536	410.798	336.975	354.43	473.988	398.283	489.928	NT5DC1	no
gene12443	15.3512	0.0678178	0.628698	0.10787	0.914099	0.938072	6.73435	22.7074	17.9242	13.4332	8.74157	21.8126	16.1049	FRK	no
gene12444	814.196	-0.505681	0.256676	-1.97011	0.0488258	0.0874354	832.815	537.753	599.864	700.593	915.923	875.737	1236.69	LOC101107200	no
gene1245	80.1546	1.9489	0.416281	4.68169	2.85e-06	2.03e-05	188.562	63.9937	164.903	28.933	28.1673	33.1229	53.4005	LOC101122647	up
gene12451	52.4899	-1.2474	0.448296	-2.78252	0.00539379	0.0134217	46.0181	20.6431	21.5091	53.7328	113.64	51.704	60.1815	HS3ST5	no
gene12453	2784.26	-0.0719046	0.198797	-0.361699	0.717577	0.784602	2679.15	2529.81	2907.31	2391.11	2922.6	2632.87	3426.96	HDAC2	no
gene12454	7660.16	0.642581	0.247592	2.59532	0.00945036	0.0215468	10039.8	7981.66	10899.1	5349.51	7396.34	4311.63	7643.05	MARCKS	no
gene12456	2.45459	-3.34052	1.69871	-1.9665	0.0492406	0.0880492	0	1.03216	0	3.09997	3.88514	3.2315	5.93339	RFPL4B	no
gene12459	2751.65	-0.0304751	0.261095	-0.11672	0.907082	0.932774	1956.33	3459.79	2738.82	2660.81	3727.8	2581.16	2136.87	LAMA4	no
gene12461	284.873	-0.519272	0.332564	-1.56142	0.118425	0.18403	329.983	164.113	191.192	204.598	382.687	271.446	450.09	FAM229B	no
gene12462	342.346	-0.991974	0.289959	-3.42108	0.000623734	0.00211414	126.83	312.743	216.286	432.962	401.141	458.066	448.395	TUBE1	no
gene12463	54.0483	-0.0707546	0.440679	-0.160558	0.872441	0.906639	40.4061	34.0612	83.6464	50.6328	32.0524	81.5954	55.9434	WISP3	no
gene12464	3650.1	-0.332489	0.225159	-1.47668	0.139761	0.210845	2777.92	3052.09	3707.93	4524.92	3539.37	4835.14	3113.33	FYN	no
gene12466	757.293	-0.286523	0.198474	-1.44363	0.148843	0.222135	676.803	709.091	632.128	946.524	795.483	843.422	697.597	TRAF3IP2	no
gene12468	1955.45	-0.672655	0.238187	-2.82406	0.00474194	0.0120076	1048.31	1605	1726.7	1823.81	2480.66	2340.42	2663.24	REV3L	no
gene12469	72.725	0.188682	0.373512	0.505156	0.613449	0.696777	43.7733	93.9262	96.7908	86.7991	60.2197	77.5561	50.01	KIAA1919	no
gene1247	8.98872	-0.0822499	1.03391	-0.0795523	0.936593	0.954853	7.85675	14.4502	3.58485	27.8997	0.971286	6.46301	1.69525	SMCP	no
gene12470	419.479	-0.78231	0.221962	-3.52452	0.000424253	0.00151995	249.171	296.229	346.535	436.062	575.001	497.651	535.7	SLC16A10	no
gene12471	390.242	-0.865033	0.25749	-3.35949	0.000780875	0.00256738	296.312	322.033	178.047	429.862	440.964	502.499	561.977	RPF2	no
gene12472	408.446	-0.27638	0.227763	-1.21345	0.224956	0.312413	303.046	342.676	448.106	421.596	419.596	409.593	514.51	GTF3C6	no
gene12473	3748.55	-0.794135	0.207626	-3.82484	0.000130859	0.000554022	2104.49	2870.43	2947.94	3982.43	4260.06	4952.28	5122.21	CDK19	no
gene12476	141.673	-0.975366	0.456465	-2.13678	0.0326156	0.061846	76.3227	167.209	29.8737	151.898	178.717	269.023	118.668	SLC22A16	no
gene12477	12.3589	-0.587017	0.692373	-0.847833	0.396531	0.495954	13.4687	9.28941	5.97474	11.3666	24.2821	15.3496	6.78102	DDO	no
gene12478	84.0044	-1.07231	0.359995	-2.97869	0.00289482	0.00786985	37.039	48.5113	69.307	69.2326	145.693	112.295	105.953	METTL24	down
gene12479	263.715	-0.168858	0.304399	-0.554724	0.579083	0.667138	170.604	252.878	315.466	189.098	379.773	294.067	244.117	WASF1	no
gene1248	5915.12	0.82504	0.25776	3.20081	0.00137043	0.00415651	8750.17	6759.59	8114.9	5583.04	4136.71	2779.9	5281.56	IVL	no
gene12483	834.686	-0.933583	0.245123	-3.80864	0.000139736	0.000585514	424.264	693.609	529.362	1038.49	795.483	1203.73	1157.86	FIG4	no
gene12484	19.0037	-1.42171	0.648547	-2.19215	0.0283686	0.0548498	2.24478	11.3537	15.5343	37.1996	13.598	23.4284	29.6669	AK9	no
gene12485	439.832	0.163393	0.230332	0.709382	0.478087	0.575928	362.533	446.924	596.279	432.962	406.969	397.475	435.68	ZBTB24	no
gene12486	2514.79	1.14031	0.282936	4.03029	5.57e-05	0.000264306	4096.73	3863.36	3007.69	2571.94	1475.38	1485.68	1102.76	MICAL1	up
gene12487	601.641	0.985851	0.241929	4.07496	4.6e-05	0.000224467	1144.84	717.349	654.832	402.996	433.194	420.903	437.376	SMPD2	no
gene12488	168.508	-1.5672	0.312684	-5.01208	5.38e-07	4.86e-06	78.5675	112.505	46.603	215.964	232.137	283.564	210.212	PPIL6	down
gene1249	556.875	1.93197	0.307398	6.28492	3.28e-10	8.78e-09	1340.14	643.033	905.771	226.298	239.908	179.348	363.632	LOC106990801	up
gene12490	14768	-0.37644	0.233654	-1.6111	0.107158	0.169291	11290.1	10322.6	16242.9	14512	15131.7	15003.9	20872.8	CD164	no
gene12491	327.584	-1.44538	0.26604	-5.43295	5.54e-08	6.98e-07	179.583	190.949	124.275	327.563	560.432	449.179	461.109	LOC101108397	down
gene12493	1097.66	-1.28076	0.256696	-4.98941	6.06e-07	5.36e-06	734.045	564.589	513.828	1004.39	1657.01	1348.34	1861.39	CEP57L1	down
gene12494	3051.38	-1.04999	0.179465	-5.85068	4.9e-09	8.75e-08	1841.85	1979.68	1858.15	3452.33	4235.78	3746.12	4245.76	SESN1	down
gene12495	329.62	-0.995192	0.242146	-4.10989	3.96e-05	0.00019637	175.093	265.264	189.997	433.996	413.768	477.455	351.765	ARMC2	no
gene12496	793.231	0.390502	0.254463	1.53461	0.124879	0.192157	689.149	900.04	1163.88	637.56	747.89	873.314	540.786	FOXO3	no
gene12497	649.644	-1.68017	0.246669	-6.81147	9.66e-12	4.34e-10	319.882	343.708	198.361	773.959	876.1	992.071	1043.43	LACE1	down
gene12498	3609.98	0.363681	0.23511	1.54686	0.121898	0.188553	4076.53	3727.12	4606.53	2810.64	3717.11	2322.64	4009.28	SNX3	no
gene1250	2988.08	2.12078	0.294298	7.20621	5.75e-13	3.94e-11	6257.34	3746.73	6004.62	1100.49	1515.21	719.009	1573.2	SPRR4	up
gene12500	25.2073	-0.192626	0.473737	-0.406609	0.684295	0.757817	24.6926	22.7074	22.704	16.5332	24.2821	29.0835	36.448	NR2E1	no
gene12504	915.512	-0.436443	0.240548	-1.81437	0.0696205	0.117884	730.677	625.487	929.67	887.624	1004.31	881.392	1349.42	OSTM1	no
gene12505	4354.99	-0.307264	0.19244	-1.59667	0.110339	0.17353	3507.48	3637.32	4360.37	4226.29	4549.5	4663.87	5540.09	SEC63	no
gene12507	120.33	-0.680094	0.271964	-2.50068	0.0123955	0.0271539	104.382	79.476	84.8413	122.965	164.147	155.112	131.382	SCML4	no
gene12508	276.004	-0.588344	0.361046	-1.62955	0.103196	0.164093	244.682	210.56	187.607	187.031	593.456	256.097	252.593	SOBP	no
gene12509	1315.13	-1.17924	0.192596	-6.12284	9.19e-10	2.13e-08	819.346	788.567	682.316	1502.45	1820.19	1672.3	1920.72	PDSS2	down
gene1251	19259.7	1.92082	0.287028	6.69212	2.2e-11	8.51e-10	37465.5	24818.2	37423.4	8646.85	9730.34	4962.78	11771	LOC101102105	up
gene12511	169.374	-0.432824	0.302773	-1.42953	0.152851	0.226908	105.505	181.659	136.224	206.665	130.152	243.171	182.24	BEND3	no
gene12512	265.569	0.00526254	0.246298	0.0213666	0.982953	0.988793	306.413	204.367	287.983	251.097	254.477	235.092	319.555	C8H6orf203	no
gene12515	7730.22	-0.630573	0.217604	-2.8978	0.00375786	0.00983161	7301.16	5126.72	5231.48	7326.26	9552.6	9131.42	10441.9	CD24	no
gene12518	686.326	-0.654952	0.217737	-3.008	0.00262972	0.0072401	448.957	556.332	544.897	835.958	642.02	819.994	956.123	QRSL1	no
gene12519	1293.66	-0.713516	0.195523	-3.64926	0.000262993	0.00100768	1067.4	961.97	812.565	1460.09	1482.18	1766.02	1505.39	RTN4IP1	no
gene12520	9029.12	0.0835739	0.211926	0.394355	0.693319	0.765233	7961.13	8170.55	11856.3	9565.47	7762.52	9293.8	8594.09	AIM1	no
gene12521	2053.66	-0.738485	0.208605	-3.54012	0.000399951	0.00144389	1365.95	1553.4	1539.09	2045.98	2380.62	2367.08	3123.51	ATG5	no
gene12525	3155.62	0.330904	0.213516	1.54979	0.121192	0.187615	3362.69	3213.1	4147.67	2652.54	2323.32	2881.69	3508.33	PRDM1	no
gene12527	2179.84	0.01355	0.179363	0.0755452	0.939781	0.957246	2417.63	2053.99	2103.11	2056.31	2332.06	2274.17	2021.59	PREP	no
gene12529	8.01236	-1.41333	0.947895	-1.49102	0.135957	0.206197	2.24478	4.12862	5.97474	3.09997	24.2821	12.1181	4.23814	POPDC3	no
gene12530	22.1248	-0.304983	0.579468	-0.526315	0.598669	0.683739	7.85675	27.8682	22.704	14.4665	39.8227	21.8126	20.3431	BVES	no
gene12532	1784.99	-0.990082	0.207881	-4.76273	1.91e-06	1.43e-05	1006.79	1284	1134.01	1963.31	2107.69	2207.92	2791.24	HACE1	no
gene12537	124.331	-0.286404	0.383821	-0.746191	0.455552	0.554877	152.645	60.8972	118.3	79.5659	140.836	116.334	201.735	GRIK2	no
gene12540	9.3248	-1.6147	0.988927	-1.63278	0.102516	0.163117	3.36718	9.28941	0	25.8331	3.88514	16.9654	5.93339	LOC105615865	no
gene12541	3579.14	-0.885727	0.21523	-4.11525	3.87e-05	0.000192872	2250.4	2366.73	2616.94	3369.67	4254.23	4722.03	5473.98	ASCC3	no
gene12549	2703.1	-0.837607	0.237985	-3.51958	0.000432236	0.00154564	1846.34	1694.8	2052.92	2406.61	3424.75	3034.38	4461.91	CCNC	no
gene1255	139.13	-0.0915982	0.410155	-0.223326	0.823282	0.869923	214.377	63.9937	124.275	84.7325	164.147	114.718	207.669	LOC101121654	no
gene12550	262.083	-0.164109	0.330263	-0.496904	0.619257	0.701649	354.676	177.531	203.141	371.996	263.218	164.807	299.212	TSTD3	no
gene12551	324.001	-1.28189	0.273014	-4.69532	2.66e-06	1.92e-05	116.729	213.656	204.336	388.529	361.318	461.297	522.138	USP45	down
gene12552	10562	-1.16935	0.276857	-4.22366	2.4e-05	0.000127452	8664.87	6096.95	3727.04	10743.5	14614.9	15206.6	14880.1	PNISR	down
gene12553	771.182	-0.490589	0.19589	-2.50441	0.0122656	0.026914	689.149	639.937	549.676	848.358	801.311	982.377	887.466	COQ3	no
gene12554	729.912	-0.569925	0.200373	-2.84431	0.00445076	0.0113798	560.074	602.779	552.066	716.093	991.683	845.846	840.846	FAXC	no
gene12555	745.961	-0.614082	0.223383	-2.74901	0.00597752	0.0146567	478.139	628.583	610.619	811.158	793.541	789.295	1110.39	FBXL4	no
gene12559	954.897	-1.11842	0.240206	-4.65606	3.22e-06	2.26e-05	483.751	725.606	506.658	1004.39	1093.67	1409.74	1460.46	MMS22L	down
gene12560	1196.63	-0.396166	0.210132	-1.88532	0.0593863	0.103223	1143.72	840.175	1057.53	1088.09	1392.82	1375.81	1478.26	KLHL32	no
gene12562	356.173	-0.918645	0.236539	-3.88369	0.000102883	0.000450066	266.007	208.496	234.21	358.563	398.227	508.962	518.748	NDUFAF4	no
gene12563	787.744	-0.816059	0.24877	-3.28038	0.00103669	0.00326111	532.014	642.001	473.2	708.86	1077.16	1239.28	841.694	GPR63	no
gene12564	87.9323	-0.220182	0.381429	-0.577255	0.563767	0.653632	56.1196	84.6368	100.376	58.8994	139.865	65.4379	110.192	FHL5	no
gene12565	1693.06	-0.50002	0.254576	-1.96412	0.0495156	0.0884392	1364.83	1225.17	1517.58	1341.25	1914.4	1757.94	2730.21	UFL1	no
gene12568	1.96459	-4.07735	1.98508	-2.054	0.0399759	0.0736149	0	0	0	1.03332	0.971286	2.42363	9.3239	FUT9	no
gene12574	782.597	-0.699923	0.29093	-2.40581	0.0161366	0.0339155	451.202	485.113	794.641	641.694	1047.05	800.605	1257.88	MANEA	no
gene12579	219.634	-1.01936	0.312834	-3.25847	0.00112014	0.00348699	121.218	141.405	152.953	171.532	244.764	285.988	419.575	EPHA7	down
gene12586	2251.33	-0.393475	0.2097	-1.87637	0.0606041	0.104966	1533.19	1928.07	2266.82	2456.21	2308.75	2342.84	2923.47	MAP3K7	no
gene12590	2216.03	-1.0967	0.225273	-4.8683	1.13e-06	9.12e-06	1501.76	1457.4	1068.28	2600.87	2301.95	3409.24	3172.67	BACH2	down
gene12591	33.6621	-1.44535	0.472254	-3.06054	0.00220935	0.00625909	10.1015	21.6753	19.1192	27.8997	55.3633	56.5513	44.9242	GJA10	down
gene12592	1634.93	-1.0869	0.233453	-4.65577	3.23e-06	2.26e-05	996.684	989.838	1000.17	1462.15	2226.19	2068.97	2700.54	CASP8AP2	down
gene12593	1232.44	-0.0250879	0.234542	-0.106965	0.914816	0.938527	1012.4	1553.4	1094.57	1345.39	1017.91	1473.57	1129.89	MDN1	no
gene12594	383.992	-0.976091	0.29462	-3.31305	0.00092285	0.00295511	327.739	189.917	224.65	359.596	442.906	437.061	706.073	LYRM2	no
gene12595	602.195	-0.979847	0.205491	-4.76832	1.86e-06	1.4e-05	315.392	416.991	428.987	751.226	798.397	795.758	708.616	ANKRD6	no
gene12599	121.13	-0.0115597	0.322006	-0.035899	0.971363	0.98048	108.872	76.3796	176.852	116.765	136.951	106.64	125.449	RRAGD	no
gene12600	1596.01	0.00551138	0.206106	0.0267405	0.978667	0.985525	1332.28	1484.24	1982.42	1532.42	1592.91	1522.04	1725.77	UBE2J1	no
gene12601	13.889	1.38758	0.788209	1.76042	0.0783361	0.130129	26.9374	35.0933	2.3899	3.09997	10.6841	9.69451	9.3239	GABRR2	no
gene12602	13.6215	-0.046907	0.802516	-0.0584499	0.95339	0.967593	11.2239	14.4502	14.3394	4.13329	37.8802	4.84725	8.47627	GABRR1	no
gene12603	305.394	-0.239221	0.321124	-0.74495	0.456302	0.555436	142.544	272.489	415.842	356.496	278.759	355.465	316.165	PM20D2	no
gene12604	115.677	-0.917709	0.315292	-2.91067	0.00360658	0.00948808	52.7524	94.9584	82.4515	110.566	137.923	144.61	186.478	SRSF12	no
gene12605	1928.74	0.610664	0.290395	2.10287	0.035477	0.0664101	2731.9	1965.23	2510.59	1250.32	1858.07	953.293	2231.8	PNRC1	no
gene12607	1782.84	-1.05254	0.227437	-4.62781	3.7e-06	2.54e-05	1161.68	1178.72	973.883	1713.25	2222.3	2287.1	2942.96	RNGTT	down
gene12608	13.596	0.0682104	0.636515	0.107162	0.91466	0.938423	20.2031	6.19294	15.5343	13.4332	16.5119	8.88663	14.4097	CNR1	no
gene12612	1153.69	-0.102949	0.197575	-0.521062	0.602324	0.687016	1159.43	1169.43	991.807	998.19	1324.83	1147.99	1284.16	AKIRIN2	no
gene12613	899.075	-0.798364	0.181414	-4.40078	1.08e-05	6.41e-05	593.746	665.741	636.908	1009.56	1093.67	1149.61	1144.3	ORC3	no
gene12614	1171.51	-0.864314	0.18554	-4.65837	3.19e-06	2.24e-05	714.964	862.883	814.955	1358.82	1366.6	1525.27	1557.09	RARS2	no
gene12615	1478.21	-0.810427	0.195371	-4.14815	3.35e-05	0.000170127	1088.72	1076.54	934.45	1496.25	1818.25	1941.33	1991.92	SLC35A1	no
gene12616	27.805	-0.507584	0.454757	-1.11617	0.264351	0.357769	16.8359	28.9004	21.5091	26.8664	26.2247	40.3938	33.9051	CFAP206	no
gene12617	3.30997	-1.66021	1.45483	-1.14118	0.253796	0.345507	0	2.06431	2.3899	6.19994	0	4.03938	8.47627	C8H6orf163	no
gene12618	236.355	-0.566318	0.232922	-2.43136	0.0150421	0.0319806	204.275	183.724	168.488	233.531	253.506	296.49	314.47	SMIM8	no
gene12619	10.7373	-1.51566	0.774272	-1.95753	0.0502852	0.0895425	7.85675	3.09647	4.77979	5.16661	14.5693	20.1969	19.4954	GJB7	no
gene1262	2.25601	1.29347	1.44573	0.894686	0.370955	0.469737	3.36718	2.06431	4.77979	2.06665	0.971286	0	2.54288	LELP1	no
gene12620	3244.16	-1.11199	0.238725	-4.65804	3.19e-06	2.24e-05	2142.65	1980.71	1726.7	2885.04	4643.72	4004.64	5325.64	ZNF292	down
gene12624	11.6517	-2.23772	0.789795	-2.8333	0.00460705	0.0117163	1.12239	4.12862	5.97474	15.4998	21.3683	8.88663	24.5812	HTR1E	no
gene12627	8538.7	-0.257374	0.20111	-1.27977	0.200626	0.283835	7049.75	7420.17	8574.95	8018.59	8631.82	8691.13	11384.5	SYNCRIP	no
gene12628	2478.84	-0.476793	0.2048	-2.32809	0.0199075	0.0406566	1826.13	1912.59	2338.51	2445.88	2603.05	2827.57	3398.14	SNX14	no
gene12629	673.086	-0.21382	0.267225	-0.800148	0.423625	0.523826	386.103	778.246	685.9	756.392	588.599	689.926	826.436	NT5E	no
gene1263	102744	-0.335987	0.240332	-1.39801	0.16211	0.238118	106273	70541.7	91248.7	129763	78278.8	128001	115103	PRR9	no
gene12634	604.081	-0.474723	0.296554	-1.6008	0.109421	0.172309	462.426	590.393	428.987	515.628	1102.41	592.173	536.548	TBX18	no
gene12635	1564.55	-0.833653	0.253031	-3.29467	0.000985366	0.00312438	1205.45	1021.83	1016.9	1441.49	1588.05	1927.59	2750.55	CEP162	no
gene12636	5.72621	-0.718112	1.04302	-0.688491	0.491143	0.587846	6.73435	1.03216	4.77979	7.23326	14.5693	4.03938	1.69525	MRAP2	no
gene12637	745.678	-1.22414	0.20162	-6.0715	1.27e-09	2.79e-08	427.632	465.502	375.214	838.025	993.625	1054.28	1065.47	LOC101117851	down
gene12638	2.03859	1.18168	1.56247	0.756286	0.449478	0.549201	5.61196	1.03216	2.3899	1.03332	0.971286	3.2315	0	RIPPLY2	no
gene12639	1377.22	-0.669034	0.684609	-0.977249	0.328446	0.425874	1741.95	719.413	628.543	501.162	3005.16	1351.58	1692.71	LOC101116409	no
gene1264	139.31	1.60302	0.259905	6.16771	6.93e-10	1.67e-08	230.09	208.496	238.99	88.8658	61.191	67.8616	79.677	LOC101121908	up
gene12640	192.506	-0.857934	0.48906	-1.75425	0.0793872	0.131601	163.869	207.463	22.704	263.497	198.142	322.342	169.525	LOC101116661	no
gene12641	33.5924	-2.79326	0.618995	-4.51258	6.4e-06	4.07e-05	11.2239	10.3216	1.19495	23.7664	87.4157	44.4332	56.791	THEMIS	down
gene12642	4283.89	-1.22017	0.200554	-6.084	1.17e-09	2.63e-08	2398.55	2537.04	2367.19	4422.62	6128.81	5563.03	6569.96	PTPRK	down
gene12648	3614.75	-0.901729	0.246423	-3.65927	0.000252939	0.000975255	2053.98	3226.52	1966.89	3665.2	5686.88	4436.85	4266.96	LAMA2	no
gene1265	246.9	0.371425	0.299181	1.24148	0.21443	0.300258	352.431	222.946	276.033	239.731	164.147	309.416	163.592	PGLYRP4	no
gene12650	1252.37	-0.555615	0.200006	-2.77799	0.00546959	0.0135767	942.81	855.658	1163.88	1455.95	1589.02	1475.99	1283.31	ARHGAP18	no
gene12652	171.879	-2.32729	0.325788	-7.14359	9.09e-13	5.8e-11	39.2837	79.476	37.0434	277.964	218.539	226.205	324.641	TMEM244	down
gene12654	505.337	-0.266316	0.200541	-1.32799	0.184182	0.264576	415.285	451.052	492.319	511.495	608.996	491.996	566.215	L3MBTL3	no
gene12655	12.6394	-0.978419	0.66623	-1.46859	0.141944	0.213628	6.73435	9.28941	8.36464	8.26658	25.2534	16.1575	14.4097	SAMD3	no
gene12656	43.3591	0.117866	0.37897	0.311016	0.755789	0.815805	33.6718	46.447	56.1626	38.2329	46.6217	48.4725	33.9051	TMEM200A	no
gene12658	3.50539	-4.90912	1.66397	-2.95024	0.00317524	0.00852915	0	0	0	2.06665	7.77029	11.3103	3.39051	SMLR1	down
gene12659	1696.41	-0.392374	0.238006	-1.64859	0.099231	0.158614	1074.13	1678.29	1565.38	1650.22	2435.99	1742.59	1728.31	EPB41L2	no
gene12663	392.798	-0.793772	0.260995	-3.04134	0.00235531	0.0066015	259.273	294.165	277.228	307.93	472.045	556.626	582.32	AKAP7	no
gene12666	85.1191	-0.960983	0.45292	-2.12175	0.033859	0.0638355	78.5675	21.6753	65.7222	113.666	127.238	138.955	50.01	ARG1	no
gene12667	919.009	-0.204478	0.233509	-0.875675	0.381207	0.480548	693.639	807.146	1036.02	893.824	888.727	866.851	1246.86	MED23	no
gene12668	955.43	-0.529325	0.364705	-1.45138	0.146675	0.219415	1176.27	287.972	823.32	849.391	1016.94	1177.07	1357.05	ENPP3	no
gene12669	973.692	-0.378349	0.193767	-1.9526	0.0508672	0.090447	702.618	841.207	949.984	1118.06	1120.86	1023.58	1059.53	ENPP1	no
gene1267	113.538	1.91796	0.360751	5.31658	1.06e-07	1.21e-06	313.147	148.63	125.47	64.066	47.593	50.0883	45.7719	S100A9	up
gene12670	2458.9	0.590482	0.240403	2.45621	0.014041	0.0301977	2496.2	2630.97	4001.88	1892.01	2239.79	1605.25	2346.23	CTGF	no
gene12673	1065.14	-0.175531	0.259709	-0.675876	0.49912	0.595226	762.104	843.272	1370.61	963.057	1177.2	958.948	1380.78	MOXD1	no
gene12674	2.44877	-0.556142	1.44567	-0.384696	0.700463	0.77068	0	1.03216	4.77979	4.13329	3.88514	1.61575	1.69525	LOC105615893	no
gene12675	2469.73	-0.426456	0.192199	-2.21883	0.0264986	0.0517031	2137.04	1787.69	2268.01	2499.61	2928.43	2564.2	3103.16	STX7	no
gene1268	151.731	-0.317393	0.384706	-0.825028	0.409356	0.509497	224.478	107.344	66.9171	228.364	167.061	135.723	132.23	LOC101103771	no
gene1269	123.672	1.19062	0.283331	4.20222	2.64e-05	0.000138194	222.234	185.788	138.614	75.4326	67.99	82.4033	93.239	S100A8	up
gene12693	10.3404	0.149598	0.82856	0.180552	0.856719	0.894895	4.48957	9.28941	19.1192	13.4332	5.82772	2.42363	17.8002	TAAR1	no
gene12696	122.321	-0.196752	0.354197	-0.555487	0.578561	0.666761	86.4242	80.5082	172.073	122.965	159.291	151.073	83.9151	VNN2	no
gene12697	837.237	-1.36098	0.262076	-5.19307	2.07e-07	2.15e-06	389.47	598.651	335.781	1269.95	845.019	1324.11	1097.68	SLC18B1	down
gene12698	5121.13	-0.794518	0.309318	-2.56862	0.0102106	0.0230283	5329.12	3102.66	2389.9	4014.46	5771.38	6820.09	8420.33	RPS12	no
gene12699	113.216	-1.25578	0.437989	-2.86715	0.00414186	0.0106939	57.242	103.216	28.6788	88.8658	142.779	248.826	122.906	EYA4	no
gene1270	231.489	0.494788	0.445223	1.11133	0.266428	0.359867	502.832	200.238	129.054	318.263	220.482	147.841	101.715	LOC105605551	no
gene12701	911.937	-0.620195	0.201028	-3.08511	0.00203474	0.00584282	661.089	783.407	648.857	1015.76	917.865	1202.12	1154.47	TBPL1	no
gene12702	523.143	-0.617345	0.223014	-2.76819	0.00563694	0.0139113	410.796	426.281	365.654	509.428	539.064	751.324	659.454	SLC2A12	no
gene12703	1823.48	-0.0834573	0.209771	-0.39785	0.690741	0.76288	1447.89	1875.43	1966.89	2044.95	1825.05	1531.73	2072.45	SGK1	no
gene12708	18.0076	-1.5979	0.66619	-2.39856	0.0164598	0.0345098	11.2239	12.3859	1.19495	36.1663	14.5693	24.2363	26.2764	ALDH8A1	no
gene12709	1446.09	-0.849896	0.192959	-4.40454	1.06e-05	6.32e-05	863.12	1061.06	1050.36	1585.12	1962	1907.39	1693.56	HBS1L	no
gene12710	306.606	-0.149599	0.228891	-0.653579	0.513383	0.608248	241.314	304.486	320.246	315.163	266.132	335.268	363.632	MYB	no
gene12711	1972.27	-1.30218	0.227015	-5.73608	9.69e-09	1.55e-07	1200.96	1157.05	861.558	1996.38	2594.3	3006.91	2988.73	AHI1	down
gene12714	850.081	-1.80018	0.254697	-7.06791	1.57e-12	9.15e-11	346.819	465.502	241.38	991.99	1347.17	1232.01	1325.69	PDE7B	down
gene12716	204.344	-0.291683	0.23538	-1.2392	0.215271	0.301216	191.929	173.402	178.047	258.331	185.516	209.24	233.945	MTFR2	no
gene12717	5435.81	-0.498329	0.214375	-2.32457	0.020095	0.0410024	4114.69	4132.75	4949.48	4919.65	6101.62	5975.86	7856.66	BCLAF1	no
gene12719	3449	-0.672458	0.173488	-3.87611	0.000106141	0.000462775	2377.23	2698.06	2650.4	4180.82	3847.26	4456.24	3932.99	MAP7	no
gene12722	3496.46	-1.20209	0.223682	-5.37411	7.7e-08	9.2e-07	1911.43	2534.98	1570.16	4097.13	4159.05	5297.24	4905.22	MAP3K5	down
gene12723	1342.29	-0.501422	0.221665	-2.26207	0.0236928	0.0470062	1123.51	1050.74	1080.23	1263.75	1360.77	1477.6	2039.39	PEX7	no
gene12724	141.198	2.93552	0.46859	6.26459	3.74e-10	9.79e-09	289.577	215.721	335.781	36.1663	76.7316	24.2363	10.1715	SLC35D3	up
gene12725	1326.15	-0.105665	0.211709	-0.499103	0.617707	0.70045	1553.39	1077.57	1181.8	1365.02	1577.37	1217.47	1310.43	IL20RA	no
gene12727	90.3722	-2.09307	0.377176	-5.54933	2.87e-08	3.94e-07	48.2629	23.7396	22.704	114.699	98.0999	180.156	144.944	IL22RA2	down
gene12728	1321.39	-0.604666	0.206224	-2.93209	0.00336689	0.00896092	851.896	929.973	1273.82	1544.82	1601.65	1526.08	1521.49	IFNGR1	no
gene12733	224.913	0.840575	0.254702	3.30023	0.000966049	0.00307167	257.028	271.457	374.019	164.298	183.573	133.299	190.716	TNFAIP3	no
gene12735	55389.4	0.478896	0.244004	1.96266	0.0496861	0.0886696	65509.6	53508	79135.5	44577.6	47700.8	34564.2	62730.3	PERP	no
gene12736	827.107	0.10567	0.213069	0.495944	0.619934	0.702091	919.239	720.445	946.399	689.226	936.32	847.462	730.655	ARFGEF3	no
gene12737	3171.92	0.455632	0.269275	1.69207	0.0906319	0.147278	4743.23	2590.71	3924.21	2362.18	3116.86	1999.49	3466.8	HEBP2	no
gene12738	1618.33	-0.349476	0.192137	-1.81889	0.068928	0.116989	1447.89	1284	1466.2	1669.85	1666.73	2126.33	1667.28	NHSL1	no
gene12739	524.297	-0.699446	0.237889	-2.94022	0.00327982	0.00876644	491.608	315.84	352.51	529.061	578.886	685.079	717.093	CCDC28A	no
gene1274	295.25	4.32253	1.1965	3.61265	0.000303079	0.00113754	144.789	1731.96	60.9424	27.8997	11.6554	24.2363	65.2673	LOC101104285	up
gene12741	104.984	-1.53399	0.398595	-3.84849	0.000118851	0.000510511	42.6509	61.9294	46.603	97.1324	101.014	122.797	262.764	ECT2L	down
gene12742	3169.44	-0.581907	0.174418	-3.33628	0.000849064	0.00275764	2221.21	2670.19	2514.17	3894.59	3521.88	3586.16	3777.87	REPS1	no
gene12743	1933.61	-0.793607	0.19362	-4.09879	4.15e-05	0.000204957	1561.25	1269.55	1257.09	2255.74	2180.54	2275.79	2735.29	ABRACL	no
gene12744	1861.85	0.460038	0.233652	1.9689	0.0489641	0.0876556	1682.47	1972.45	2963.47	1760.78	1447.22	1568.09	1638.46	HECA	no
gene12745	81.3625	-1.02143	0.310577	-3.28882	0.0010061	0.00318127	58.3644	55.7364	39.4333	85.7658	114.612	113.91	101.715	TXLNB	down
gene12746	1968.44	1.09068	0.245174	4.4486	8.64e-06	5.28e-05	2626.4	2403.89	3443.84	1186.25	1460.81	970.259	1687.63	CITED2	up
gene1275	70.4652	0.182925	0.364474	0.501886	0.615748	0.698831	102.138	42.3184	82.4515	72.3326	72.8464	52.5119	68.6578	S100A5	no
gene12752	1728.77	-0.615031	0.190732	-3.22459	0.00126154	0.00386393	1291.87	1278.84	1407.65	1787.65	1985.31	1946.17	2403.87	VTA1	no
gene12753	2069.21	-0.797366	0.228959	-3.48257	0.000496626	0.00173987	1062.91	1455.34	1848.59	2571.94	2299.03	2863.11	2383.53	ADGRG6	no
gene12754	2640.65	-1.13329	0.209622	-5.40632	6.43e-08	7.92e-07	1333.4	1931.16	1444.69	3029.7	3781.22	3733.19	3231.15	HIVEP2	down
gene12756	1259.22	-0.812519	0.247536	-3.28243	0.00102918	0.00324106	1149.33	814.371	673.951	1221.39	1899.84	1499.42	1556.24	AIG1	no
gene12757	597.389	-0.928843	0.28923	-3.21143	0.00132076	0.00402298	540.993	377.769	262.889	836.992	648.819	956.525	557.739	ADAT2	no
gene12758	1732.57	-0.137834	0.248812	-0.553968	0.579601	0.667644	2110.1	1055.9	1750.6	1711.18	1758.03	1724.81	2017.35	PEX3	no
gene12759	543.248	0.261129	0.28842	0.905377	0.365266	0.463907	664.456	328.226	807.785	498.062	539.064	454.026	511.119	FUCA2	no
gene1276	2376.63	1.37637	0.334586	4.11364	3.89e-05	0.000193773	4556.91	2519.49	3914.65	1126.32	2373.82	812.723	1332.47	S100A4	up
gene12760	1083.2	-0.699871	0.230991	-3.02987	0.00244661	0.00681053	666.701	712.188	1016.9	1022.99	1381.17	1366.93	1415.54	PHACTR2	no
gene12762	1395.93	-0.609742	0.217935	-2.79781	0.00514503	0.0128852	952.911	1234.46	1032.44	1834.15	1251.02	1848.42	1618.12	LTV1	no
gene12763	217.768	-1.38889	0.319179	-4.35146	1.35e-05	7.78e-05	97.6481	176.499	64.5272	302.764	270.989	327.998	283.955	ZC2HC1B	down
gene12764	2297.75	-0.276816	0.22661	-1.22155	0.221877	0.30894	1621.86	2421.44	2106.69	2534.74	1913.43	2906.74	2579.33	PLAGL1	no
gene12765	1100.36	-0.00119445	0.265319	-0.00450194	0.996408	0.997415	1472.58	672.966	1154.32	1018.86	1229.65	1009.84	1144.3	SF3B5	no
gene12766	598.595	-0.380952	0.19572	-1.94641	0.0516055	0.0915599	514.056	451.052	566.406	687.16	712.924	640.645	617.92	STX11	no
gene1277	7193.3	1.07302	0.278394	3.85431	0.000116056	0.000499886	15427.3	6655.34	8737.46	5149.05	5443.09	4028.88	4912	S100A3	up
gene12772	12724.9	-0.543515	0.192386	-2.82514	0.00472605	0.011978	9048.73	10428.9	10785.6	12066.1	14531.4	15808.5	16405	UTRN	no
gene12777	102.443	-0.819928	0.323778	-2.53238	0.0113293	0.025186	62.854	81.5403	69.307	87.8324	176.774	108.255	130.535	EPM2A	no
gene12779	266.309	0.0424796	0.367458	0.115604	0.907966	0.933261	106.627	281.779	424.207	284.164	216.597	261.752	289.041	FBXO30	no
gene1278	13949.7	-0.112669	0.277345	-0.40624	0.684566	0.758055	20094.2	8694.88	11203.8	14187.5	15694	12091.5	15681.9	S100A2	no
gene12780	1306.87	-0.454318	0.230413	-1.97175	0.0486381	0.087145	759.86	1208.65	1267.84	1330.92	1423.91	1492.15	1664.74	SHPRH	no
gene12781	9.70043	-3.90759	1.2023	-3.2501	0.00115366	0.00357385	0	3.09647	0	10.3332	5.82772	10.5024	38.1432	GRM1	down
gene12782	261.407	0.482709	0.251621	1.9184	0.0550606	0.0967464	398.449	289.004	248.549	229.398	261.276	195.506	207.669	RAB32	no
gene12783	17.2539	-2.33644	0.64188	-3.63999	0.000272646	0.00103921	5.61196	4.12862	5.97474	14.4665	30.1099	28.2757	32.2098	ADGB	down
gene12786	1792.23	-0.93971	0.218933	-4.29223	1.77e-05	9.79e-05	961.89	1207.62	1357.46	1905.45	2024.16	2362.23	2726.82	STXBP5	no
gene12787	18547	-1.81281	0.204038	-8.88467	6.41e-19	2.81e-16	7414.52	9060.27	6364.3	26040.8	24509.4	31554	24885.5	SASH1	down
gene1279	5549.04	1.52366	0.333904	4.56315	5.04e-06	3.33e-05	12644.9	5655.18	8236.78	2722.81	4154.19	1628.68	3800.76	S100A16	up
gene12795	1480.39	-0.596006	0.236079	-2.52461	0.0115827	0.0256727	916.995	1262.33	1257.09	1563.42	2312.63	1574.55	1475.72	UST	no
gene12796	3120.24	-0.270477	0.191556	-1.412	0.157949	0.23292	2425.49	2739.34	3209.63	3136.14	3228.55	3284.82	3817.71	TAB2	no
gene12799	35.9715	-0.056023	0.411795	-0.136046	0.891785	0.921756	21.3255	42.3184	41.8232	40.2996	34.9663	37.1623	33.9051	ZC3H12D	no
gene128	593.5	0.960676	0.338543	2.83767	0.00454435	0.0115827	1079.74	419.055	966.713	396.796	508.954	257.712	525.529	GJB5	no
gene1280	650.1	-0.664842	0.367196	-1.81059	0.0702043	0.118626	838.427	285.907	336.975	1124.26	629.393	536.429	799.312	S100A1	no
gene12800	1475.03	-0.54093	0.184586	-2.93051	0.00338406	0.00900099	1062.91	1129.18	1320.42	1754.58	1554.06	1791.87	1712.21	PPIL4	no
gene12801	1608.85	-0.227195	0.21464	-1.05849	0.289831	0.38497	1471.46	1214.85	1712.36	1446.65	1705.58	1650.49	2060.58	GINM1	no
gene12802	2135.77	-0.30426	0.188187	-1.6168	0.105922	0.167741	1936.13	1799.05	1914.31	2609.14	1972.68	2507.65	2211.46	KATNA1	no
gene12803	1870.29	-0.363588	0.241528	-1.50537	0.13223	0.201382	1232.39	1531.72	2057.7	1814.52	1857.1	1959.1	2639.51	LATS1	no
gene12805	754.45	-0.740095	0.211253	-3.50336	0.000459435	0.00162792	497.22	516.078	623.763	898.991	739.149	989.648	1016.3	NUP43	no
gene12806	50.1248	-1.3784	0.389125	-3.54231	0.000396639	0.00143424	29.1822	27.8682	21.5091	66.1327	51.4782	94.5215	60.1815	PCMT1	down
gene12807	646.953	0.26259	0.255326	1.02845	0.303738	0.400056	817.102	528.464	799.421	736.759	487.586	676.192	483.147	LRP11	no
gene12809	11.0274	0.223811	0.807669	0.277107	0.781698	0.836172	1.12239	21.6753	13.1444	8.26658	15.5406	7.27088	10.1715	LOC101105006	no
gene1281	3156.43	-0.116088	0.207042	-0.5607	0.575002	0.663778	2917.1	3433.98	2685.05	3879.09	2662.29	3427.01	3090.45	CHTOP	no
gene12810	14.0506	0.021993	0.579789	0.0379327	0.969741	0.97919	17.9583	10.3216	14.3394	11.3666	14.5693	14.5418	15.2573	LOC101105258	no
gene12812	5.1161	-2.40968	1.11575	-2.1597	0.0307962	0.0589516	1.12239	2.06431	1.19495	8.26658	11.6554	7.27088	4.23814	IYD	no
gene12813	4063.73	-0.965526	0.190485	-5.06877	4e-07	3.74e-06	2231.32	2921	2741.21	5319.55	4543.68	5599.39	5090	PLEKHG1	no
gene12815	475.68	-0.0295687	0.218216	-0.135502	0.892215	0.922033	386.103	483.049	541.312	463.962	520.609	521.08	413.642	MTHFD1L	no
gene12816	1643.2	0.776995	0.260744	2.97992	0.00288325	0.00784089	2012.45	2060.18	2395.87	1126.32	1884.29	1085.78	937.476	AKAP12	no
gene12817	363.872	0.368268	0.214345	1.71811	0.085777	0.140699	374.879	479.953	397.918	288.297	357.433	306.185	342.441	ZBTB2	no
gene12818	724.666	-0.954564	0.256809	-3.71701	0.000201591	0.000799259	574.665	535.689	304.712	796.692	833.363	981.569	1045.97	RMND1	no
gene12819	241.228	-0.579194	0.249413	-2.32223	0.0202206	0.0412125	237.947	172.37	154.148	264.531	249.62	281.949	328.032	ARMT1	no
gene1282	826.614	0.249683	0.23844	1.04715	0.295028	0.390932	1141.47	693.609	892.627	666.493	912.037	669.729	810.332	SNAPIN	no
gene12820	35.9807	0.304922	0.398854	0.764494	0.444573	0.544607	53.8748	36.1255	31.0687	34.0997	32.0524	29.8914	34.7527	LOC106991320	no
gene12821	150.637	-0.0673242	0.33468	-0.20116	0.840573	0.882909	163.869	113.537	162.513	112.632	249.62	126.836	125.449	CCDC170	no
gene12822	522.074	0.759396	0.267151	2.84257	0.00447514	0.0114353	599.358	581.104	863.948	321.363	544.891	317.495	426.356	ESR1	no
gene12824	2329.69	-0.541479	0.232966	-2.32428	0.0201103	0.0410169	1417.58	2346.09	1781.67	2536.81	2948.82	3076.39	2200.44	SYNE1	no
gene12827	206.692	-0.967685	0.317453	-3.04828	0.00230153	0.00646987	80.8123	134.18	186.412	183.931	307.898	256.097	297.517	MYCT1	no
gene12829	263.628	-0.15537	0.210579	-0.737822	0.460623	0.559671	246.926	250.814	244.964	268.664	261.276	263.367	309.384	FBXO5	no
gene1283	1950.34	0.346574	0.211443	1.63909	0.101195	0.161331	2642.11	1948.71	2073.24	1921.98	1683.24	1425.09	1958.02	ILF2	no
gene12830	683.487	-0.570548	0.181934	-3.13602	0.00171259	0.00504309	514.056	542.914	548.481	795.659	781.885	752.94	848.475	MTRF1L	no
gene12831	34.2644	-2.87019	0.536917	-5.34569	9.01e-08	1.05e-06	6.73435	6.19294	9.55959	33.0663	41.7653	66.2458	76.2864	RGS17	down
gene12833	47.596	-0.152138	0.398818	-0.381472	0.702853	0.772515	61.7316	23.7396	48.9929	47.5329	53.4207	46.0489	51.7053	LOC101104501	no
gene12835	90.5024	-1.09578	0.383224	-2.85937	0.00424478	0.0109217	26.9374	83.6047	53.7727	85.7658	145.693	112.295	125.449	IPCEF1	no
gene12836	1496.26	0.0694408	0.199334	0.348364	0.727567	0.793001	1720.63	1285.03	1607.21	1639.88	1296.67	1513.96	1410.45	CNKSR3	no
gene12842	2649.91	-0.520038	0.221396	-2.3489	0.0188289	0.0387548	1784.6	2596.91	1988.39	2413.84	3110.06	3083.66	3571.9	SCAF8	no
gene12843	391.66	-0.304583	0.236689	-1.28685	0.198147	0.281024	295.189	426.281	314.271	420.562	344.806	489.573	450.938	TIAM2	no
gene12844	224.375	-0.817244	0.26178	-3.12187	0.00179706	0.00524935	140.299	207.463	120.69	256.264	267.104	260.944	317.86	TFB1M	no
gene1285	70.4962	2.17337	0.389151	5.58491	2.34e-08	3.31e-07	87.5466	159.984	132.639	42.3662	32.0524	19.389	19.4954	NPR1	up
gene12850	6076.12	-0.912	0.239864	-3.80216	0.00014344	0.000598981	3584.92	5078.21	3458.18	5370.18	8137.43	8085.22	8818.71	ARID1B	no
gene12851	754.828	-0.837579	0.218874	-3.82677	0.000129838	0.000550381	584.766	532.593	444.521	1014.72	732.35	1053.47	921.371	TMEM242	no
gene12853	1193.1	-1.70901	0.277448	-6.15974	7.29e-10	1.75e-08	472.527	757.603	327.416	1601.65	1879.44	1866.19	1446.9	ZDHHC14	down
gene12855	2641.41	0.267276	0.180567	1.48021	0.138817	0.209694	2727.41	2852.88	3191.71	2637.04	2267.95	2582.78	2230.11	SNX9	no
gene12859	308.552	-0.00788898	0.322278	-0.0244788	0.980471	0.986819	170.604	399.444	352.51	407.129	218.539	334.461	277.174	SYNJ2	no
gene1286	79.2055	1.14089	0.357386	3.19232	0.00141134	0.00425792	112.239	129.02	103.961	40.2996	81.588	33.9308	53.4005	LOC106990802	up
gene12860	450.798	-0.922469	0.264492	-3.4877	0.000487201	0.00171141	241.314	343.708	309.492	707.826	379.773	630.143	543.329	SERAC1	no
gene12861	1309.17	-0.591728	0.237064	-2.49606	0.012558	0.0274605	1359.22	809.21	877.092	1275.12	1576.4	1628.68	1638.46	GTF2H5	no
gene12863	1134.1	-0.756349	0.233037	-3.24562	0.00117196	0.00362264	684.659	1042.48	713.384	1472.49	1153.89	1618.98	1252.79	TULP4	no
gene12866	1303.81	0.740463	0.206771	3.58108	0.000342176	0.00126595	1567.98	1502.82	2005.12	1167.65	871.243	973.49	1038.34	TMEM181	no
gene12868	784.728	0.294989	0.263372	1.12005	0.262694	0.355921	1178.51	684.32	769.547	622.06	846.961	553.395	838.303	DYNLT1	no
gene12869	369.273	0.0320308	0.214885	0.14906	0.881506	0.913616	439.978	358.158	323.831	367.863	327.323	382.933	384.823	SYTL3	no
gene1287	1510.19	1.1659	0.198757	5.86599	4.46e-09	8.13e-08	2209.99	2098.37	2321.79	1171.79	1039.28	893.511	836.608	INTS3	up
gene12870	2700.67	0.549291	0.193073	2.845	0.00444119	0.0113616	3564.72	2695.99	3631.45	2222.68	2284.46	2079.47	2425.91	EZR	no
gene12872	142.437	0.43433	0.255458	1.7002	0.0890938	0.145248	194.174	154.823	152.953	134.332	102.956	134.915	122.906	RSPH3	no
gene12873	59.7813	0.575051	0.363756	1.58087	0.113908	0.178079	65.0988	66.058	89.6211	40.2996	71.8752	36.3544	49.1624	TAGAP	no
gene12875	555.316	0.290653	0.313148	0.928163	0.353323	0.451591	416.408	530.528	912.941	497.028	712.924	459.681	357.699	FNDC1	no
gene1288	936.616	0.661059	0.221498	2.98449	0.00284054	0.00774074	1435.54	1099.25	1021.68	912.424	719.723	731.128	636.568	SLC27A3	no
gene12880	1391.33	-0.0962014	0.193833	-0.496311	0.619675	0.70194	1186.37	1264.39	1565.38	1475.59	1349.12	1559.2	1339.25	SOD2	no
gene12881	1922.4	-0.325889	0.169586	-1.92167	0.0546467	0.0961378	1674.61	1647.32	1715.95	2102.81	1961.03	2119.06	2236.04	WTAP	no
gene12882	1529.08	1.31906	0.284838	4.63091	3.64e-06	2.51e-05	2836.29	1676.22	2462.79	963.057	1246.16	566.321	952.733	ACAT2	up
gene12883	6925.71	0.0204282	0.193738	0.105442	0.916025	0.939203	6897.1	6040.18	8008.55	7015.23	6437.68	6210.14	7871.07	TCP1	no
gene12884	556.28	0.178951	0.296437	0.603671	0.546062	0.637906	877.711	410.798	499.489	488.762	641.049	385.357	590.796	MRPL18	no
gene12885	61.5251	-0.38292	0.421592	-0.908271	0.363735	0.462444	43.7733	79.476	33.4586	105.399	63.1336	62.2064	43.229	PNLDC1	no
gene12886	9.21645	1.78753	0.896672	1.99352	0.0462044	0.0832907	8.97914	11.3537	26.2889	1.03332	8.74157	7.27088	0.847627	MAS1	no
gene12887	670.659	0.735765	0.297036	2.47702	0.0132483	0.0287421	529.769	936.166	1141.18	677.86	383.658	578.439	447.547	IGF2R	no
gene12888	32.376	1.90607	0.470585	4.05042	5.11e-05	0.000245097	46.0181	52.64	68.1121	23.7664	15.5406	12.926	7.62864	LOC106991323	up
gene12889	568.761	1.88091	0.311171	6.04461	1.5e-09	3.23e-08	1195.35	757.603	969.103	390.596	310.811	168.846	189.021	LOC106991303	up
gene1289	978.989	0.178898	0.209761	0.85287	0.393732	0.493174	826.081	1172.53	1148.35	845.258	871.243	1014.69	974.771	GATAD2B	no
gene12892	284.063	-0.784907	0.331776	-2.36577	0.0179925	0.0372823	141.421	296.229	164.903	285.197	502.155	359.505	239.031	SLC22A3	no
gene12893	8.15681	-0.104731	0.898439	-0.11657	0.907201	0.93284	2.24478	17.5467	3.58485	6.19994	8.74157	14.5418	4.23814	PLG	no
gene12895	2080.66	0.0738227	0.187023	0.394726	0.693045	0.765106	1946.23	2257.33	2221.41	2283.64	1815.33	2152.99	1887.67	MAP3K4	no
gene12896	87.8152	-1.1426	0.417876	-2.7343	0.00625121	0.0152405	46.0181	87.7333	21.5091	140.532	120.439	117.95	80.5246	AGPAT4	no
gene12898	2937.62	-1.91729	0.244507	-7.84146	4.45e-15	5.99e-13	1293	1337.67	775.522	3801.6	3665.63	5101.74	4588.21	PARK2	down
gene129	387.942	1.93103	0.317888	6.07456	1.24e-09	2.74e-08	875.466	379.833	756.402	204.598	197.171	113.103	189.021	GJB4	up
gene1290	481.547	0.959592	0.279674	3.43111	0.000601116	0.00205049	547.728	867.011	584.33	462.929	313.725	360.313	234.793	DENND4B	no
gene12900	352.632	-0.793659	0.313174	-2.53424	0.011269	0.0250618	360.288	184.756	200.751	283.13	417.653	438.677	583.167	PACRG	no
gene12903	5898.3	-0.173871	0.19915	-0.873066	0.382627	0.481983	4459.27	5396.11	6633.16	5806.24	6332.78	6056.64	6603.86	QKI	no
gene12908	4.64371	-1.9247	1.35629	-1.41909	0.155874	0.230367	1.12239	4.12862	0	9.29991	10.6841	7.27088	0	C8H6orf118	no
gene12909	434.83	-2.07557	0.302385	-6.864	6.7e-12	3.14e-10	175.093	199.206	84.8413	741.926	475.93	628.527	738.283	PDE10A	down
gene1291	714.039	0.436752	0.205576	2.12453	0.0336258	0.0634793	878.833	907.265	731.309	731.593	559.461	625.296	564.52	CRTC2	no
gene12915	1818.56	-0.387347	0.18251	-2.12234	0.0338096	0.0637705	1688.08	1388.25	1562.99	2082.15	2100.89	2102.09	1805.45	SFT2D1	no
gene12916	4011.71	-0.138959	0.23168	-0.599789	0.548647	0.640318	5082.19	2798.18	3497.61	3935.93	4456.26	3963.44	4348.33	MPC1	no
gene12917	474.74	0.0480875	0.224792	0.21392	0.830609	0.875295	503.954	528.464	418.232	567.294	491.471	429.79	383.975	RPS6KA2	no
gene12918	791.008	1.03137	0.235924	4.37162	1.23e-05	7.18e-05	950.666	1256.13	1143.57	733.659	455.533	485.533	511.967	RNASET2	up
gene12919	816.635	-0.46406	0.237398	-1.95477	0.0506097	0.0900454	719.454	723.542	569.99	1164.55	748.861	1036.5	753.541	FGFR1OP	no
gene1292	1706.52	1.32934	0.219024	6.06938	1.28e-09	2.82e-08	2455.79	2434.86	2913.28	1154.22	1131.55	748.901	1107	SLC39A1	up
gene12920	61.6661	0.815887	0.478556	1.70489	0.0882142	0.144061	26.9374	99.087	119.495	67.166	30.1099	37.1623	51.7053	CCR6	no
gene12922	5.8433	-1.66478	0.964736	-1.72563	0.0844143	0.13877	3.36718	2.06431	2.3899	6.19994	13.598	5.65513	7.62864	LOC105612542	no
gene12923	2.34766	4.2237	1.68979	2.49954	0.0124356	0.0272312	4.48957	6.19294	4.77979	0	0.971286	0	0	TTLL2	no
gene12924	1035.15	0.347771	0.225648	1.54121	0.123265	0.190254	1216.67	1019.77	1302.49	995.09	822.679	1154.45	734.893	UNC93A	no
gene12928	4693.83	0.341843	0.25644	1.33304	0.18252	0.262763	4895.88	5825.49	5290.04	5789.71	2975.05	4785.05	3295.57	MLLT4	no
gene1293	31.7334	0.871489	0.539891	1.61419	0.106486	0.168431	74.0779	26.8361	27.4838	20.6665	32.0524	10.5024	30.5146	CREB3L4	no
gene12930	28.7649	-1.23706	0.559102	-2.21258	0.0269263	0.052418	6.73435	22.7074	19.1192	50.6328	16.5119	50.8962	34.7527	KIF25	no
gene12933	91.7904	0.878579	0.374907	2.34346	0.0191058	0.0392538	133.565	78.4439	160.123	84.7325	92.2722	48.4725	44.9242	DACT2	no
gene12934	1653.95	0.612004	0.237458	2.57731	0.00995714	0.022534	1940.62	2342.99	1898.77	1721.52	1515.21	1160.92	997.657	SMOC2	no
gene12935	1275.49	0.935948	0.283574	3.30054	0.000964979	0.00306957	1314.32	1699.96	2246.5	1329.89	938.262	688.31	711.159	THBS2	no
gene12937	149.28	-0.827505	0.302897	-2.73197	0.00629575	0.0153297	117.851	114.569	77.6717	220.098	172.889	218.126	123.754	WDR27	no
gene12938	514.593	1.22351	0.315939	3.87261	0.000107677	0.000468638	519.668	730.767	1042	424.696	351.605	184.196	349.222	C8H6orf120	up
gene12939	2042.66	0.0868996	0.210308	0.413202	0.679459	0.753779	1943.98	2399.76	1995.56	2396.28	1687.12	2141.68	1734.25	PHF10	no
gene1294	1028.92	-0.0105661	0.22368	-0.0472379	0.962324	0.973712	1324.42	823.661	926.085	925.857	1061.62	1021.96	1118.87	JTB	no
gene12940	168.583	-1.497	0.323328	-4.62997	3.66e-06	2.52e-05	103.26	102.183	41.8232	247.998	203.97	270.638	210.212	TCTE3	down
gene12941	1185.09	-0.547991	0.296934	-1.8455	0.0649654	0.111462	874.344	1284	653.637	1893.05	1053.85	1536.58	1000.2	ERMARD	no
gene12943	440.331	0.194274	0.219486	0.88513	0.376086	0.475285	555.584	432.473	434.961	479.462	438.05	359.505	382.28	DLL1	no
gene12944	1510.68	-0.172841	0.231989	-0.745038	0.456248	0.555436	1097.7	1722.67	1404.06	1872.38	1306.38	1745.01	1426.56	FAM120B	no
gene12945	4094.94	-0.100169	0.232488	-0.430856	0.666573	0.742373	5308.92	2975.71	3515.54	4534.22	3853.09	4048.27	4428.85	PSMB1	no
gene12946	680.334	-0.172525	0.184031	-0.937477	0.348513	0.446812	631.907	670.902	599.864	746.059	666.302	698.005	749.302	TBP	no
gene12947	675.89	0.203094	0.195609	1.03827	0.299146	0.395224	734.045	750.378	707.41	741.926	559.461	627.719	610.292	PDCD2	no
gene1295	899.921	-0.125588	0.266446	-0.471344	0.637395	0.717494	1121.27	632.712	812.565	765.692	1159.72	733.551	1073.94	RAB13	no
gene12950	4.84353	1.35212	0.978502	1.38183	0.167024	0.244091	6.73435	7.22509	8.36464	3.09997	0.971286	2.42363	5.08576	LOC101121783	no
gene12959	591.933	-1.80118	0.276408	-6.51637	7.2e-11	2.35e-09	297.434	290.036	145.784	792.559	882.899	1021.96	712.854	KCNQ5	down
gene12962	20.6004	-2.27575	0.800752	-2.84201	0.00448295	0.0114535	4.48957	13.418	1.19495	8.26658	65.0762	16.1575	35.6003	RIMS1	no
gene12966	233.399	0.0710573	0.291228	0.243992	0.807237	0.856259	175.093	194.045	351.315	190.131	263.218	229.437	230.555	OGFRL1	no
gene12967	157.775	-2.37532	0.30357	-7.82462	5.09e-15	6.65e-13	50.5077	60.8972	27.4838	238.698	252.534	265.791	208.516	B3GAT2	down
gene12968	3391.9	0.0524669	0.201197	0.260774	0.794267	0.846118	4221.32	3027.31	3139.13	3127.87	3607.36	3058.62	3561.73	SMAP1	no
gene12969	954.792	-1.495	0.234848	-6.36582	1.94e-10	5.64e-09	556.707	472.728	375.214	1090.16	1130.58	1551.93	1506.23	SDHAF4	down
gene1297	2199.87	-1.33392	0.344238	-3.87499	0.000106627	0.000464423	1740.83	792.696	997.782	1469.39	3207.19	2946.32	4244.92	RPS27	down
gene12970	5279.23	-1.49291	0.190409	-7.84054	4.49e-15	5.99e-13	2406.41	2649.55	2719.7	7224.99	6112.3	8502.08	7339.6	FAM135A	down
gene12973	19.5237	0.883817	0.611276	1.44586	0.148218	0.221375	19.0807	35.0933	25.0939	5.16661	28.1673	10.5024	13.562	LOC101102992	no
gene12974	66.7227	-2.03262	0.482594	-4.21187	2.53e-05	0.00013322	25.815	31.9968	14.3394	36.1663	155.406	88.0585	115.277	COL19A1	down
gene12975	2499.72	-0.572189	0.177965	-3.21518	0.00130364	0.00397506	1942.86	1806.27	2118.64	2630.84	2864.32	3118.4	3016.7	LMBRD1	no
gene12978	30.898	-2.03613	0.543479	-3.74647	0.000179339	0.000725578	15.7135	8.25725	9.55959	23.7664	50.5069	34.7387	73.7436	ADGRB3	down
gene1299	160.433	-1.7506	0.345438	-5.06777	4.02e-07	3.76e-06	68.4659	103.216	32.2636	276.931	219.511	213.279	209.364	NUP210L	down
gene12991	4759.13	-0.451927	0.215326	-2.0988	0.0358345	0.0669914	3609.61	3891.23	4297.04	4103.33	5755.84	5041.95	6614.88	PHF3	no
gene12992	714.127	0.289161	0.293859	0.984013	0.325109	0.422147	454.569	871.14	1064.7	813.225	529.351	577.631	688.273	PTP4A1	no
gene12994	67.0556	-0.919676	0.329086	-2.79464	0.00519574	0.0129894	37.039	48.5113	47.7979	81.6325	67.0187	84.827	102.563	LOC101105008	no
gene12999	795.407	-0.0622583	0.219356	-0.283823	0.776546	0.83201	774.451	859.786	693.07	927.924	679.9	943.599	689.121	LOC101105510	no
gene13	5206.84	1.21058	0.233095	5.1935	2.06e-07	2.14e-06	6806.19	7448.04	8870.1	3523.63	4124.08	2323.45	3352.37	2021-09-02	up
gene130	865.011	1.9071	0.32073	5.94612	2.75e-09	5.34e-08	1899.09	1008.42	1559.41	318.263	541.978	227.821	500.1	GJB3	up
gene13001	690.399	0.286477	0.304184	0.941788	0.346301	0.444543	1097.7	587.297	623.763	629.294	636.192	399.898	858.646	C9H8orf33	no
gene13002	997.839	-0.52875	0.306317	-1.72615	0.0843202	0.138628	934.953	974.355	479.174	1680.18	884.841	1127.79	903.571	ZNF34	no
gene13004	33382.5	0.768951	0.292996	2.62444	0.00867907	0.0200638	59548.5	31699.6	39850.3	20844.2	29232.8	17142.3	35359.6	RPL8	no
gene13005	629.416	0.656568	0.218204	3.00897	0.00262138	0.00722296	758.737	794.76	832.879	654.093	444.849	463.721	456.871	ZNF7	no
gene13006	328.79	0.719073	0.268212	2.68099	0.00734048	0.0174555	535.381	277.65	458.86	227.331	286.529	232.668	283.107	COMMD5	no
gene13007	1388.15	-0.241312	0.273681	-0.881728	0.377924	0.476972	1240.24	1626.68	904.576	1877.55	1108.24	1759.55	1200.24	ARHGAP39	no
gene13008	174.127	1.27257	0.26809	4.74678	2.07e-06	1.53e-05	327.739	232.235	225.845	102.299	86.4444	116.334	127.992	C9H8orf82	up
gene13009	272.412	0.873303	0.262408	3.32803	0.00087463	0.00282746	506.199	310.679	286.788	191.165	200.085	189.043	222.926	LRRC24	no
gene13010	534.466	0.470137	0.243089	1.93401	0.0531119	0.0938236	848.529	553.236	504.268	509.428	479.815	446.755	399.232	LRRC14	no
gene13011	302.201	1.0038	0.237705	4.22288	2.41e-05	0.000127774	465.793	474.792	329.806	232.498	180.659	232.668	199.192	RECQL4	up
gene13012	216.728	0.658449	0.277	2.37708	0.0174505	0.0363115	362.533	222.946	236.6	176.698	221.453	151.073	145.792	MFSD3	no
gene13013	6.3241	2.14123	0.965466	2.21782	0.0265672	0.0518074	10.1015	8.25725	15.5343	3.09997	3.88514	0	3.39051	GPT	no
gene13014	1.86728	-0.634395	1.58271	-0.400827	0.688548	0.761195	1.12239	3.09647	0	2.06665	0.971286	2.42363	3.39051	FOXH1	no
gene13015	280.504	0.244412	0.339295	0.720353	0.471308	0.569896	321.004	432.473	169.683	346.163	237.965	288.412	167.83	KIFC2	no
gene13016	2203.4	0.667208	0.225201	2.96273	0.00304929	0.0082296	3409.83	2581.42	2392.29	2244.38	1646.33	1623.83	1525.73	CYHR1	no
gene13017	369.064	1.3798	0.237719	5.80436	6.46e-09	1.1e-07	650.988	474.792	581.94	277.964	200.085	186.619	211.059	TONSL	up
gene13018	1440.3	1.3141	0.27314	4.81107	1.5e-06	1.17e-05	3084.33	1760.86	1717.14	914.491	1125.72	662.458	817.113	VPS28	up
gene13019	3.38262	0.829568	1.13518	0.730781	0.464913	0.563671	7.85675	2.06431	3.58485	3.09997	2.91386	1.61575	2.54288	SLC39A4	no
gene13020	543.433	1.43994	0.289783	4.96902	6.73e-07	5.85e-06	844.039	994.999	710.994	444.329	241.85	363.544	204.278	CPSF1	up
gene13021	1542.87	0.237967	0.294098	0.809142	0.418433	0.51845	1741.95	2168.56	1157.91	2059.41	1054.82	1533.35	1084.12	ADCK5	no
gene13022	669.147	0.89484	0.222799	4.01636	5.91e-05	0.000278191	1120.15	823.661	783.886	485.662	555.576	506.538	408.556	SLC52A2	no
gene13023	838.061	0.967083	0.252608	3.8284	0.00012898	0.000547966	1527.58	1084.8	874.702	734.693	591.513	577.631	475.519	LOC101108580	no
gene13025	259.354	0.25609	0.253912	1.00858	0.313177	0.409804	358.043	279.714	219.871	233.531	260.305	268.215	195.802	DGAT1	no
gene13026	826.274	0.966945	0.195989	4.93367	8.07e-07	6.84e-06	1134.74	1209.69	1093.38	676.827	592.484	579.247	497.557	HSF1	no
gene13027	567.959	1.39687	0.261907	5.33345	9.64e-08	1.12e-06	1159.43	750.378	728.919	349.263	427.366	256.904	303.451	BOP1	up
gene13029	1754.51	1.22753	0.264346	4.64366	3.42e-06	2.38e-05	3094.44	2517.43	2213.04	1608.88	955.745	1099.52	792.531	MROH1	up
gene13031	36.189	0.105492	0.461262	0.228703	0.8191	0.866156	24.6926	46.447	41.8232	37.1996	46.6217	39.5859	16.9525	LOC101110150	no
gene13032	384.473	1.2798	0.240566	5.31997	1.04e-07	1.19e-06	610.581	550.139	575.965	241.798	306.926	174.501	231.402	HGH1	up
gene13034	103.843	0.787372	0.371951	2.11687	0.0342708	0.064477	156.013	187.852	65.7222	99.199	79.6454	79.9797	58.4863	LOC105612922	no
gene13035	2065.44	0.70409	0.269789	2.60978	0.00906014	0.0207926	3425.54	1931.16	2594.23	1361.92	1949.37	1182.73	2013.11	MAF1	no
gene13036	1309.38	0.696665	0.252283	2.76144	0.00575468	0.0141712	2248.15	1549.27	1230.8	1155.26	1167.49	1000.15	814.57	SHARPIN	no
gene13037	3178.95	0.724282	0.286608	2.52708	0.0115014	0.0255156	5861.13	2990.16	3462.96	2128.65	3003.22	1764.4	3042.13	LOC101113599	no
gene13038	2046.4	1.33352	0.267796	4.97959	6.37e-07	5.6e-06	4271.83	2396.67	2699.39	1233.79	1594.85	898.358	1229.91	GPAA1	up
gene13039	727.861	0.369128	0.275568	1.33951	0.180404	0.260168	1177.39	615.165	714.579	535.261	748.861	531.582	772.188	EXOSC4	no
gene1304	3466.97	0.351349	0.216772	1.62082	0.105056	0.166555	4700.58	3394.76	3771.26	2859.2	3484.97	2497.95	3560.03	TPM3	no
gene13040	363.027	1.40088	0.255114	5.49121	3.99e-08	5.23e-07	702.618	586.265	399.113	244.898	223.396	205.2	179.697	OPLAH	up
gene13041	9.10107	0.355252	0.73245	0.485018	0.627663	0.709107	14.5911	8.25725	8.36464	7.23326	9.71286	11.3103	4.23814	SMPD5	no
gene13042	2.05482	-0.743204	1.53217	-0.485066	0.627629	0.709107	0	2.06431	2.3899	3.09997	1.94257	4.03938	0.847627	SPATC1	no
gene13043	554.982	1.44895	0.301068	4.81271	1.49e-06	1.16e-05	1217.8	668.837	722.944	320.33	458.447	227.821	268.698	GRINA	up
gene13044	756.408	0.828965	0.264068	3.13921	0.00169404	0.00499793	1367.07	965.066	691.875	686.126	593.456	508.962	482.3	PARP10	no
gene13045	29.0763	-0.0687875	0.566623	-0.121399	0.903375	0.930081	34.7942	40.2541	9.55959	41.3329	25.2534	38.778	13.562	LOC105615982	no
gene13046	8978.2	1.87876	0.311345	6.03435	1.6e-09	3.41e-08	15061.4	14761.9	16300.3	6925.33	3945.36	3595.05	2258.08	LOC101111462	up
gene13047	2927.22	1.82428	0.267928	6.80883	9.84e-12	4.38e-10	4547.93	4388.73	5948.45	2021.18	1270.44	1382.28	931.542	EPPK1	up
gene13048	76.8826	1.47298	0.36526	4.03268	5.51e-05	0.00026186	122.341	146.566	94.4009	60.9661	30.1099	54.1277	29.6669	LOC105616111	up
gene13049	500.638	0.401442	0.295944	1.35648	0.174946	0.253352	659.967	661.612	421.817	626.194	359.376	483.918	291.584	LOC101111719	no
gene1305	213.256	-0.227848	0.260224	-0.875584	0.381256	0.480575	253.661	186.82	142.199	233.531	209.798	246.402	220.383	C1H1orf189	no
gene13050	2065.03	1.35449	0.256711	5.27631	1.32e-07	1.46e-06	3865.52	2593.81	3041.14	1254.45	1666.73	858.772	1174.81	PUF60	up
gene13051	1823.97	1.22315	0.25494	4.79778	1.6e-06	1.24e-05	3103.42	2985	2037.39	1547.92	1010.14	1213.43	870.513	SCRIB	up
gene13052	531.819	0.477789	0.2364	2.0211	0.0432693	0.0788139	811.49	597.618	492.319	506.328	475.93	449.987	389.061	LOC105613386	no
gene13054	2858.55	1.53636	0.269826	5.69389	1.24e-08	1.91e-07	4143.87	4306.16	5257.77	2395.24	1168.46	1505.07	1233.3	FAM83H	up
gene13055	67.3239	0.859833	0.35503	2.42186	0.0154412	0.0327197	118.974	85.669	66.9171	59.9327	42.7366	60.5907	36.448	MAPK15	no
gene13056	38.503	0.246544	0.373819	0.659528	0.509557	0.604678	46.0181	41.2862	39.4333	38.2329	40.794	30.6993	33.0575	CCDC166	no
gene13057	238.651	-0.394762	0.259861	-1.51913	0.12873	0.197035	194.174	251.846	160.123	270.731	327.323	220.55	245.812	ZNF623	no
gene13058	76.9069	0.534421	0.353311	1.51261	0.130379	0.199096	79.6899	78.4439	121.885	80.5992	82.5593	46.8568	48.3147	LOC101112989	no
gene13059	836.355	1.19271	0.251402	4.74422	2.09e-06	1.55e-05	1677.98	1015.64	1003.76	511.495	650.762	453.218	541.634	TSTA3	up
gene1306	1228.63	-0.0904961	0.197494	-0.458221	0.646794	0.725495	1405.24	1064.15	1085.01	1195.55	1403.51	1243.32	1203.63	C1H1orf43	no
gene13060	534.419	1.22589	0.32945	3.72103	0.000198411	0.000788848	1225.65	605.876	550.871	308.964	458.447	217.319	373.804	PYCRL	up
gene13061	240.403	2.17773	0.276812	7.8672	3.63e-15	5.05e-13	415.285	409.766	474.395	94.0324	111.698	58.9749	118.668	TIGD5	up
gene13062	9134.78	0.770253	0.311368	2.47377	0.0133695	0.0289721	18130	8387.3	9370.79	5492.11	8002.42	5024.18	9536.65	EEF1D	no
gene13063	160.616	1.6825	0.29235	5.7551	8.66e-09	1.4e-07	312.025	248.75	233.015	100.232	84.5019	51.704	94.0866	LOC106991335	up
gene13064	680.384	1.06265	0.272622	3.8979	9.7e-05	0.000427796	1333.4	857.722	715.774	387.496	579.858	376.47	511.967	LOC101113505	up
gene13065	106.58	0.259697	0.432192	0.600884	0.547917	0.63968	142.544	137.277	72.8919	160.165	41.7653	123.605	67.8102	MROH6	no
gene13067	336.278	1.37459	0.246402	5.57864	2.42e-08	3.41e-07	655.477	455.181	443.326	234.564	209.798	163.191	192.411	GSDMD	up
gene13068	664.368	0.435214	0.245716	1.7712	0.0765267	0.127632	842.917	888.686	609.424	707.826	513.81	646.301	441.614	ZC3H3	no
gene13069	4.60874	2.04843	1.27544	1.60605	0.108262	0.170767	5.61196	3.09647	15.5343	4.13329	3.88514	0	0	MAFA	no
gene1307	2810.21	0.595826	0.19655	3.03142	0.00243405	0.00677996	3214.53	3897.42	3338.69	2639.11	2246.58	2421.2	1913.94	UBAP2L	no
gene13070	130.697	1.65464	0.299614	5.52258	3.34e-08	4.48e-07	288.455	163.081	191.192	59.9327	82.5593	69.4773	60.1815	RHPN1	up
gene13071	5.06693	0.459361	1.11899	0.410515	0.681428	0.75518	2.24478	6.19294	9.55959	8.26658	0	2.42363	6.78102	LOC101114532	no
gene13072	3.23134	-0.300218	1.28111	-0.234342	0.814719	0.86259	2.24478	6.19294	0	5.16661	4.85643	1.61575	2.54288	LOC105615987	no
gene13073	124.505	0.104821	0.277011	0.378399	0.705135	0.774261	149.278	140.373	99.1807	134.332	111.698	134.107	102.563	ZNF696	no
gene13074	527.988	0.642744	0.223419	2.87685	0.00401663	0.0104036	803.633	656.451	532.947	488.762	411.825	421.711	380.585	GLI4	no
gene13076	19.867	0.749043	0.65912	1.13643	0.255778	0.347817	32.5494	9.28941	35.8485	11.3666	15.5406	5.65513	28.8193	GPIHBP1	no
gene13077	4.47397	1.79494	1.22053	1.47062	0.141393	0.21293	10.1015	3.09647	9.55959	0	0.971286	0.807876	6.78102	LOC101118536	no
gene13079	2.35844	-3.24783	2.22068	-1.46254	0.143593	0.215579	0	0	1.19495	14.4665	0	0	0.847627	LOC101116324	no
gene1308	569.967	-0.269702	0.233952	-1.15281	0.248989	0.339937	656.6	422.152	451.691	562.128	581.8	588.134	727.264	HAX1	no
gene13080	20.0879	-1.62972	0.602276	-2.70593	0.00681137	0.0163882	10.1015	12.3859	4.77979	32.033	28.1673	39.5859	13.562	LOC101102377	no
gene13081	63.256	-1.21869	0.480714	-2.53516	0.0112396	0.0250028	39.2837	59.8651	8.36464	88.8658	62.1623	96.9451	87.3056	LY6K	no
gene13083	1483.82	2.66067	0.346147	7.68655	1.51e-14	1.61e-12	4314.48	1624.61	2638.45	399.896	712.924	299.722	396.69	LOC105614075	up
gene13084	318.349	1.71491	0.411403	4.16845	3.07e-05	0.0001572	949.544	269.393	365.654	121.932	264.19	119.566	138.163	LY6D	up
gene13085	1391.18	1.6554	0.395524	4.18533	2.85e-05	0.00014751	3458.09	1319.1	2064.87	501.162	1143.2	329.613	922.218	LYNX1	up
gene13086	25.0728	1.6402	0.671891	2.44117	0.0146396	0.0312687	69.5883	39.2219	14.3394	4.13329	9.71286	9.69451	28.8193	LYPD2	no
gene13087	85.8668	1.75153	0.518631	3.37721	0.000732243	0.00243086	59.4868	155.856	215.091	23.7664	81.588	16.9654	48.3147	SLURP1	up
gene13088	120.032	1.59957	0.386065	4.14326	3.42e-05	0.00017325	259.273	157.92	166.098	66.1327	70.9039	26.6599	93.239	THEM6	up
gene13089	56.7738	-0.296657	0.384745	-0.771049	0.440678	0.540884	66.2212	40.2541	44.2131	71.2993	57.3059	79.9797	38.1432	LOC105614078	no
gene1309	3.93499	-5.07397	1.57956	-3.21228	0.00131686	0.00401182	0	0	0	5.16661	4.85643	5.65513	11.8668	AQP10	down
gene13090	313.678	1.70684	0.298313	5.72164	1.06e-08	1.66e-07	527.524	474.792	555.651	214.931	202.999	96.9451	122.906	JRK	up
gene13091	70.4748	2.28885	0.391802	5.84186	5.16e-09	9.17e-08	138.054	112.505	136.224	45.4662	27.196	17.7733	16.1049	ARC	up
gene13093	53.5647	0.899754	0.614324	1.46462	0.143024	0.214913	32.5494	164.113	21.5091	67.166	41.7653	26.6599	21.1907	ADGRB1	no
gene13094	401.209	0.239348	0.271019	0.883142	0.37716	0.476273	507.321	470.663	340.56	481.528	260.305	420.903	327.184	TSNARE1	no
gene13096	214.712	0.214628	0.405776	0.528932	0.596852	0.682277	379.369	138.309	181.632	305.864	132.095	250.441	115.277	MROH5	no
gene13097	128.2	1.18658	0.302989	3.91623	8.99e-05	0.000400326	227.846	161.016	176.852	69.2326	119.468	74.3246	68.6578	PTP4A3	up
gene13098	14.1452	0.630941	0.743929	0.84812	0.396371	0.495826	13.4687	14.4502	25.0939	23.7664	11.6554	8.88663	1.69525	LOC105616113	no
gene131	169.181	0.669824	0.281619	2.37848	0.0173844	0.0361954	264.885	154.823	224.65	120.899	165.119	111.487	142.401	GJA4	no
gene1310	775.826	1.32857	0.301363	4.40853	1.04e-05	6.22e-05	754.248	1348	1444.69	686.126	393.371	466.144	338.203	ATP8B2	up
gene13100	765.957	0.661524	0.29985	2.20618	0.0273714	0.0531756	1308.71	527.432	1073.06	710.926	702.24	496.844	542.481	SLC45A4	no
gene13101	295.861	0.0244711	0.222481	0.109992	0.912416	0.936682	251.416	337.515	307.102	313.097	265.161	275.486	321.251	DENND3	no
gene13102	3066.21	-0.389799	0.200723	-1.94197	0.0521405	0.0923079	2406.41	3148.08	2258.45	3642.46	3348.99	3649.98	3009.08	PTK2	no
gene13103	864.905	0.0367342	0.248608	0.14776	0.882532	0.914181	650.988	1114.73	866.338	1062.26	718.752	890.279	750.998	AGO2	no
gene13104	610.854	-0.165999	0.211109	-0.786318	0.431681	0.53198	674.558	521.239	517.413	606.561	663.388	564.705	728.112	CHRAC1	no
gene13106	1318.88	-0.454117	0.219232	-2.0714	0.0383212	0.0709883	1121.27	1206.59	938.035	1721.52	1158.74	1692.5	1393.5	TRAPPC9	no
gene13108	8.58614	-0.965276	0.791421	-1.21967	0.222588	0.309754	5.61196	5.16078	5.97474	11.3666	3.88514	14.5418	13.562	KCNK9	no
gene13109	29.4092	-1.64956	0.681972	-2.41881	0.0155712	0.0329416	10.1015	7.22509	22.704	17.5665	11.6554	83.2112	53.4005	COL22A1	no
gene1311	872.684	0.0828857	0.256228	0.323484	0.746328	0.808196	576.91	1043.51	1083.82	919.657	853.76	924.21	706.921	IL6R	no
gene13110	32.0348	-2.27423	0.603478	-3.76853	0.000164209	0.000674022	4.48957	21.6753	3.58485	46.4995	33.0237	75.1324	39.8385	FAM135B	down
gene13113	118.409	-0.240643	0.323017	-0.744984	0.456281	0.555436	133.565	87.7333	100.376	117.799	187.458	99.3687	102.563	KHDRBS3	no
gene13119	541.507	-0.538901	0.224584	-2.39956	0.0164149	0.0344284	350.186	532.593	407.477	636.527	573.059	710.931	579.777	ZFAT	no
gene1312	574.119	-0.398553	0.247205	-1.61224	0.10691	0.168976	368.145	511.949	577.16	811.158	554.604	658.419	537.396	SHE	no
gene13123	417.923	-0.265616	0.248169	-1.07031	0.284482	0.379486	280.598	490.274	352.51	456.729	516.724	437.869	390.756	ST3GAL1	no
gene13125	5293.88	1.05869	0.207115	5.11162	3.19e-07	3.08e-06	9039.75	6545.93	7008.37	4338.92	3485.95	3246.04	3392.2	NDRG1	up
gene13126	164.637	0.300191	0.352132	0.852495	0.393939	0.493398	150.401	175.467	227.04	169.465	236.022	104.216	89.8485	WISP1	no
gene13127	14.5546	-1.36114	0.687742	-1.97914	0.0477998	0.0858318	1.12239	13.418	8.36464	22.7331	16.5119	19.389	20.3431	TG	no
gene13129	3274.02	-0.844051	0.172518	-4.89253	9.95e-07	8.22e-06	2436.71	2191.27	2125.81	3714.8	4095.91	4231.65	4122.01	PHF20L1	no
gene1313	105.07	-0.546186	0.368607	-1.48176	0.138405	0.209185	72.9555	103.216	72.8919	204.598	97.1286	105.024	79.677	TDRD10	no
gene13130	23.4167	-1.24796	0.543545	-2.29597	0.0216778	0.0437004	5.61196	12.3859	21.5091	22.7331	37.8802	29.8914	33.9051	TMEM71	no
gene13131	2.98328	-2.01731	1.42499	-1.41567	0.156872	0.23159	1.12239	2.06431	0	7.23326	2.91386	1.61575	5.93339	LRRC6	no
gene13133	115.006	-2.96454	0.378314	-7.83619	4.64e-15	6.16e-13	32.5494	25.8039	11.9495	200.465	137.923	248.018	148.335	KCNQ3	down
gene13135	21.3857	-0.665204	0.623269	-1.06728	0.285844	0.380918	26.9374	10.3216	10.7545	16.5332	50.5069	19.389	15.2573	OC90	no
gene13136	4240.38	-0.381105	0.225111	-1.69297	0.0904615	0.147071	2810.47	3424.69	4612.5	4671.65	4050.26	4633.17	5479.91	EFR3A	no
gene1314	1632.27	0.871892	0.215562	4.04474	5.24e-05	0.000250409	2198.77	2013.74	2397.07	1266.85	1406.42	890.279	1252.79	UBE2Q1	no
gene13142	24.9619	-1.04729	0.58922	-1.77741	0.0755002	0.126227	10.1015	28.9004	7.16969	27.8997	53.4207	21.8126	25.4288	ADCY8	no
gene13145	949.077	-0.838293	0.214275	-3.91223	9.14e-05	0.000406485	530.892	800.953	630.933	1246.19	1165.54	1241.7	1027.32	ASAP1	no
gene13146	1336.27	-0.993562	0.239836	-4.14267	3.43e-05	0.000173574	675.68	1183.88	699.045	1611.98	1825.05	1672.3	1685.93	FAM49B	no
gene13147	57.1961	-0.229687	0.492445	-0.46642	0.640915	0.72046	14.5911	71.2188	70.502	54.7661	36.9089	72.7088	79.677	GSDMC	no
gene13152	1184.07	0.531718	0.186508	2.85091	0.00435944	0.0111898	1309.83	1446.05	1555.82	1062.26	922.722	915.323	1076.49	MYC	no
gene13158	582.494	0.668394	0.284116	2.35254	0.0186456	0.0384309	465.793	766.892	984.638	538.361	378.802	387.78	555.196	FAM84B	no
gene13159	104.361	-0.178894	0.319981	-0.559077	0.576109	0.664518	58.3644	114.569	118.3	101.266	100.042	107.447	130.535	LOC101104157	no
gene13160	353.329	0.777588	0.298857	2.60187	0.00927158	0.0212014	264.885	518.142	608.229	313.097	212.712	254.481	301.755	TRIB1	no
gene13162	4755.44	-1.53525	0.262257	-5.85399	4.8e-09	8.61e-08	2590.48	2838.43	1413.62	5490.04	6180.29	7953.54	6821.7	NSMCE2	down
gene13165	1149.32	0.171898	0.211318	0.813458	0.415956	0.516022	982.093	1344.9	1357.46	1199.69	916.894	1091.44	1152.77	KIAA0196	no
gene13166	7441.54	0.511792	0.273539	1.871	0.0613447	0.106034	11686.4	5398.18	9834.43	5524.14	6144.35	5499.21	8004.14	SQLE	no
gene13167	71.7736	0.0193759	0.391056	0.0495476	0.960483	0.972367	39.2837	60.8972	117.105	77.4992	55.3633	75.1324	77.1341	ZNF572	no
gene1317	1539.23	-0.0625205	0.217059	-0.288035	0.77332	0.829649	1188.61	1796.98	1517.58	1779.38	1574.45	1601.21	1316.36	ADAR	no
gene13171	5654.89	-0.283836	0.189843	-1.49511	0.134887	0.204828	4699.46	5864.71	4525.27	6517.17	5443.09	6549.45	5985.1	MTSS1	no
gene13172	2129.88	-0.230862	0.254823	-0.905972	0.364951	0.463804	2773.43	1355.22	1684.88	2123.48	2156.25	2384.04	2431.84	NDUFB9	no
[truncated: 15,102 more rows]
