# Supplementary material for: Transcriptome Analysis Reveals Candidate Genes Regulating the Skin and Hair Diversity of Xinji Fine-Wool Sheep and Tan Sheep
Source: MDPI journal article supplement (doi:10.3390/agriculture12010015), 2021-12-23
Supplement: s1 [file s1 › Supplementary Table S10.xlsx]

## Sheet: Supplementary Table S10
Table S10 | Statistics of the DEGs in 12-m-XFWS vs. 3-m-XFWS.
Row.names	baseMean	log2FoldChange	lfcSE	stat	pvalue	p_value	X1	X2	X3	C1	C2	C3	C4	C5	C6	name	significant
gene1	0.459217	2.91072	3.38663	0.859474	0.390079	0.582642	0	0.927912	3.20504	0	0	0	0	0	0	RTP5	no
gene10	354.776	0.787773	0.443473	1.77637	0.0756717	0.192835	623.188	514.063	341.871	282.559	200.556	595.658	259.555	159.845	215.689	BOK	no
gene10000	4499.28	0.845356	0.488546	1.73035	0.0835678	0.206311	5046.42	5161.05	8954.89	2121.23	3566.87	7723.84	3899.37	2148.9	1870.95	CD74	no
gene10003	2106.38	0.321557	0.407512	0.789073	0.430069	0.618394	1998.4	2819	2473.22	2447.76	1833.04	679.969	2213.26	1734.26	2758.5	NDST1	no
gene10004	865.85	1.04889	0.32186	3.25882	0.00111875	0.00880366	940.774	1436.41	1585.43	514.632	712.728	377.761	758.546	633.371	833.005	SYNPO	up
gene10005	1395.58	0.461399	0.507141	0.909804	0.362926	0.556309	1768.69	1518.99	1833.28	705.99	1293.91	3091.07	776.654	716.298	855.317	MYOZ3	no
gene10006	841.944	0.93987	0.254546	3.69234	0.000222197	0.00246262	1139.51	1201.65	1368.55	698.661	691.162	892.391	533.195	527.609	524.76	RBM22	no
gene10007	2713.54	0.0123727	0.228162	0.0542275	0.956754	0.978971	2180.16	2679.81	3327.9	2913.53	2463.82	2139.55	2719.3	2832.74	3165.09	DCTN4	no
gene10008	331.823	-0.149251	0.321603	-0.464084	0.642588	0.785076	352.54	321.058	254.267	265.459	383.859	525.58	286.718	228.35	368.572	SMIM3	no
gene1001	817.011	-0.556348	0.491467	-1.13201	0.257628	0.445599	476.379	794.293	595.07	945.391	844.275	203.662	977.86	1308.81	1207.36	IGSF3	no
gene10011	48.8472	-0.108503	0.486892	-0.222848	0.823654	0.899859	40.9466	65.8817	32.0504	30.1288	67.9302	59.1278	18.1085	70.9087	54.542	ZNF300	no
gene10013	5841.18	-1.89166	0.771143	-2.45306	0.0141648	0.0584023	2302	1747.26	2193.32	2361.44	7718.16	27656.5	3085.49	1757.09	3749.35	GPX3	no
gene10014	1741.46	0.257886	0.4121	0.625786	0.531455	0.702881	2186.15	1583.02	2095.03	1268.66	1150.5	3415.18	1555.32	1091.27	1328.01	TNIP1	no
gene10016	1152.81	0.437283	0.513943	0.85084	0.394858	0.587064	1172.47	1539.41	1476.46	759.733	899.266	2641.04	683.094	520.398	683.427	ANXA6	no
gene10017	68.138	-0.784285	0.497847	-1.57535	0.115175	0.256589	31.9583	71.4492	34.1871	41.5288	49.5998	156.579	85.5125	82.9272	59.5003	CCDC69	no
gene10018	16.352	-0.179326	0.567917	-0.315761	0.752184	0.856645	11.9844	11.1349	22.4353	30.1288	17.2521	8.75967	11.0663	9.61474	24.7918	GM2A	no
gene10019	115.569	-0.986126	0.385878	-2.55554	0.0106025	0.0472414	82.8919	58.4585	68.3742	72.4719	160.66	109.496	120.723	140.616	226.432	SLC36A3	no
gene1002	74.6383	-0.000954898	0.443594	-0.00215264	0.998282	0.999356	43.9427	77.0167	102.561	69.2147	53.9128	71.1723	90.5426	126.194	37.1877	CD2	no
gene10020	318.127	1.30184	0.656891	1.98182	0.0474998	0.1391	604.212	430.551	545.926	273.602	156.347	17.5193	224.344	436.269	174.369	SLC36A2	no
gene10022	743.297	-0.76274	0.413624	-1.84404	0.0651771	0.173656	399.479	626.341	496.782	803.705	1116	284.689	910.456	1029.98	1022.25	SLC36A1	no
gene10024	1620.7	0.0528826	0.251139	0.210571	0.833222	0.905491	1754.71	1590.44	1636.71	1934.75	1042.67	1520.9	1882.28	1759.5	1464.37	FAT2	no
gene10026	28793.5	0.823415	0.506059	1.62711	0.103713	0.23838	30992.6	27117.3	63541	17991.7	36075.2	43335.2	14011	13399.3	12678.5	SPARC	no
gene10027	3696.34	-1.07824	0.546307	-1.97369	0.0484173	0.140834	3112.94	1362.17	1894.18	3118.73	3148.51	11054.7	2423.52	4964.81	2187.46	ATOX1	no
gene10028	1952.73	-0.120989	0.255317	-0.473876	0.635589	0.780606	2017.37	1809.43	1708.29	2008.85	1938.71	2918.07	1525.14	1900.11	1748.65	G3BP1	no
gene10029	11.2597	-2.37155	0.770475	-3.07804	0.00208369	0.0140319	3.99479	2.78374	2.13669	17.1001	12.9391	4.37984	8.04823	27.6424	22.3126	GLRA1	no
gene1003	1508.78	1.05606	0.233423	4.52423	6.06e-06	0.000131916	1661.83	2476.6	2783.05	1096.04	1238.92	1249.35	1052.31	948.254	1072.66	PTGFRN	up
gene10030	743.792	1.19206	0.498149	2.39298	0.0167121	0.0657743	1326.27	915.849	1326.89	241.03	597.354	1200.07	368.207	397.81	320.641	LOC105615377	no
gene10031	1.02557	1.65167	2.01836	0.818323	0.413173	0.603798	1.9974	3.71165	0	2.44287	1.07826	0	0	0	0	LOC101107700	no
gene10032	30.0944	0.0501415	0.632126	0.079322	0.936776	0.967617	30.9596	38.0444	23.5036	41.5288	19.4086	7.66471	71.4281	16.8258	21.4862	NMUR2	no
gene10035	300.875	-0.765999	0.38655	-1.98163	0.0475207	0.139118	215.719	269.094	130.338	343.631	459.337	278.12	181.085	328.103	502.447	GRIA1	no
gene10037	1029.91	-0.214159	0.14725	-1.45439	0.145837	0.302604	935.78	941.831	914.505	1078.12	1168.83	1036.93	1019.11	1017.96	1156.12	FAM114A2	no
gene10038	266.052	1.04029	0.467821	2.2237	0.0261686	0.0910289	204.733	423.128	586.523	257.316	171.443	65.6975	215.29	219.937	250.397	MFAP3	no
gene10039	328.994	-0.285556	0.451463	-0.632513	0.527052	0.700184	200.738	293.22	367.512	493.46	360.138	106.211	436.617	414.636	288.411	GALNT10	no
gene1004	82.7958	-1.18334	0.470587	-2.5146	0.0119169	0.0513268	36.9518	68.6655	28.8454	182.401	77.6345	61.3177	63.3798	93.7438	132.223	CD101	no
gene10041	1.45554	-3.56622	2.00448	-1.77913	0.0752184	0.192136	0	0	0	1.62858	2.15651	0	0	6.00922	3.30557	HAND1	no
gene10043	1661.28	1.34318	0.289051	4.64687	3.37e-06	7.99e-05	2359.92	2947.98	3053.34	1192.94	1320.86	606.607	1102.61	1091.27	1275.95	LARP1	up
gene10045	28.6293	-1.37099	0.618124	-2.21799	0.0265556	0.0919607	14.9805	22.2699	4.27339	13.8429	22.6434	27.374	36.217	54.0829	61.9795	FAXDC2	no
gene10046	711.927	0.117444	0.193492	0.606967	0.543873	0.712827	727.052	696.862	830.106	764.619	700.867	558.429	770.618	638.179	720.615	CNOT8	no
gene10047	561.051	0.216051	0.228007	0.947565	0.343351	0.53732	648.155	613.35	592.933	452.746	699.789	499.301	458.749	611.738	472.697	GEMIN5	no
gene10048	1620.61	-1.14725	0.221382	-5.18221	2.19e-07	8.05e-06	986.714	958.533	740.365	1870.43	2188.86	1670.91	1860.15	2502.24	1807.32	MRPL22	down
gene1005	514.121	0.248166	0.177502	1.3981	0.162082	0.325521	535.302	613.35	574.771	505.674	506.781	526.675	450.701	504.774	409.065	TTF2	no
gene10051	978.722	-2.03794	0.608084	-3.35141	0.000804003	0.00676979	418.455	359.102	178.414	1450.25	1380.17	147.819	1523.13	2047.94	1303.22	SGCD	down
gene10054	42.828	-1.78504	0.44301	-4.02935	5.59e-05	0.00082427	18.9753	14.8466	14.9569	35.8288	53.9128	29.5639	78.4703	76.918	61.9795	LOC105611754	down
gene10056	132.852	-1.34144	0.546377	-2.45516	0.0140824	0.058184	43.9427	68.6655	84.3994	79.8005	193.008	381.046	135.814	68.5051	140.487	TIMD4	no
gene10058	1.0265	-3.05794	2.13604	-1.43159	0.152261	0.311395	0	0	0	1.62858	0	4.37984	0	2.40369	0.826394	HAVCR1	no
gene10059	10.1459	2.07902	3.1746	0.654894	0.512536	0.688473	0	0	61.9642	0.814291	20.4869	0	8.04823	0	0	LOC101113331	no
gene1006	244.487	-0.536668	0.368578	-1.45605	0.145379	0.301875	147.807	220.843	195.508	318.388	176.834	401.85	326.959	150.23	261.967	TRIM45	no
gene10060	1.29741	0.206312	2.4836	0.0830694	0.933796	0.965436	0	0	4.27339	0	5.39128	0	2.01206	0	0	LOC106990259	no
gene10062	40.6382	-0.58718	0.579219	-1.01374	0.310705	0.503194	8.98828	26.9094	55.5541	31.7573	52.8346	19.7093	38.2291	67.3032	64.4587	HAVCR2	no
gene10063	657.959	-0.232907	0.195885	-1.189	0.234439	0.41921	616.197	562.315	588.659	670.975	595.198	865.017	699.19	704.28	619.795	MED7	no
gene10065	132.267	0.766436	0.346312	2.21313	0.0268884	0.0928056	124.837	170.736	251.062	88.7577	89.4953	124.825	85.5125	163.451	91.7297	ITK	no
gene10066	2087.2	1.08861	0.230508	4.72267	2.33e-06	5.86e-05	3180.85	2548.05	3952.89	1912.77	1564.55	1321.62	1369.21	1421.78	1513.13	CYFIP2	up
gene10068	1022.91	0.862175	0.401093	2.14957	0.0315895	0.103998	1407.17	1318.56	1658.08	1077.31	411.894	389.805	993.957	1039.59	909.859	NIPAL4	no
gene10069	362.911	-0.319525	0.410691	-0.778019	0.436558	0.624689	188.754	395.29	350.418	435.645	381.703	148.914	420.52	435.067	509.885	ADAM19	no
gene1007	597.204	0.769602	0.290298	2.65107	0.00802365	0.0384572	662.137	801.716	1009.59	534.989	461.494	326.298	388.327	648.995	541.288	VTCN1	no
gene10070	2.23998	-0.229439	1.13459	-0.202222	0.839743	0.910111	3.99479	0.927912	1.06835	0	2.15651	3.28488	3.01809	2.40369	3.30557	SOX30	no
gene10071	334.472	-0.0725789	0.296636	-0.244674	0.806709	0.888351	352.54	302.499	315.162	363.988	252.312	521.2	321.929	247.58	333.037	THG1L	no
gene10072	221.321	0.0740698	0.2773	0.267111	0.789384	0.877188	170.777	229.194	287.385	260.573	218.886	153.294	255.531	205.515	210.73	LSM11	no
gene10073	2532.83	0.448808	0.292084	1.53657	0.124398	0.270336	2352.93	2755.9	4137.71	2323.99	2175.92	1558.13	2429.56	3022.64	2038.71	CLINT1	no
gene10076	5846.67	-2.47019	0.528024	-4.67818	2.89e-06	7.03e-05	1265.35	2245.55	843.994	7771.59	10804.1	1665.43	8779.61	9349.14	9895.24	EBF1	down
gene10078	2435.05	0.302683	0.238271	1.27033	0.203968	0.381298	2131.22	3149.33	3078.98	2249.88	2771.12	2050.86	1854.11	2588.77	2041.19	RNF145	no
gene1008	2484.33	-0.203751	0.403216	-0.505315	0.613338	0.76224	2212.12	1983.88	2572.58	2778.36	3382.49	891.296	2334.99	3527.41	2675.86	MAN1A2	no
gene10081	1819.51	-0.750227	0.310651	-2.41502	0.0157345	0.0632187	1430.14	1161.75	1160.23	1743.4	2129.56	1416.88	1673.03	3255.79	2404.81	UBLCP1	no
gene10082	0.420566	-1.79045	3.51306	-0.509656	0.610293	0.760052	0	0	0	1.62858	2.15651	0	0	0	0	IL12B	no
gene10084	61.8969	-1.13919	0.600441	-1.89725	0.0577947	0.159689	28.9622	54.7468	19.2303	80.6148	89.4953	12.0445	60.3617	103.359	108.258	ADRA1B	no
gene10086	1494.29	-0.233947	0.248726	-0.940579	0.346921	0.540974	1550.98	1076.38	1384.58	1529.24	1415.75	2203.06	1385.3	1532.35	1370.99	TTC1	no
gene10087	994.494	-0.134557	0.375875	-0.357982	0.720356	0.834884	748.025	1162.67	889.933	925.034	1238.92	448.933	1056.33	1520.33	960.269	PWWP2A	no
gene10088	2.27617	-4.21174	2.43748	-1.72791	0.084005	0.207045	0	0	0	0	3.23477	16.4244	0	0	0.826394	FABP6	no
gene10089	55.1464	-0.00145145	0.378554	-0.0038342	0.996941	0.999356	40.9466	83.5121	40.5972	46.4146	73.3214	37.2286	49.2954	58.8903	66.1115	CCNJL	no
gene10090	183.195	0.72441	0.478037	1.51538	0.129675	0.278348	202.736	232.906	309.821	84.6862	184.382	314.253	139.838	105.762	74.3754	C1QTNF2	no
gene10092	257.658	0.318015	0.277977	1.14403	0.252609	0.440413	262.658	271.878	355.76	158.787	232.903	267.17	200.2	270.415	299.154	ZBED8	no
gene10093	1739.23	-0.391396	0.615142	-0.636269	0.524601	0.698184	1679.81	1147.83	1492.48	1756.42	2646.04	171.909	1771.62	2641.65	2345.3	SLU7	no
gene10094	467.593	-0.892703	0.603774	-1.47854	0.139264	0.292877	335.563	271.878	285.249	265.459	412.972	1646.82	254.525	435.067	300.807	PTTG1	no
gene10096	983.617	-1.44507	0.669582	-2.15817	0.0309146	0.102484	459.401	532.621	381.4	2265.36	842.118	102.926	1305.83	2069.57	893.331	ATP10B	no
gene10097	56.8319	-1.09097	0.458059	-2.38173	0.0172315	0.0673112	28.9622	30.6211	37.3922	35.8288	86.2605	55.8429	52.3135	132.203	52.0628	GABRB2	no
gene10099	0.373151	-1.56338	3.5244	-0.443588	0.65734	0.794591	0	0	0	0	2.15651	0	0	1.20184	0	GABRA6	no
gene1010	597.876	0.303568	0.229315	1.3238	0.185568	0.357565	713.07	493.649	847.2	571.632	553.146	477.402	577.461	582.894	564.427	FAM46C	no
gene10101	19.067	-1.0455	1.02802	-1.01701	0.30915	0.501458	6.99089	0.927912	25.6403	22.8001	73.3214	1.09496	14.0844	16.8258	9.91672	GABRA1	no
gene10102	10.1763	-3.88011	1.21457	-3.19463	0.00140011	0.010382	2.99609	0	0	5.70003	10.7826	47.0832	8.04823	12.0184	4.95836	GABRG2	no
gene10107	5544.27	-0.136822	0.416565	-0.328452	0.74257	0.850318	5517.81	4083.74	5996.63	4470.46	5679.18	2418.76	5181.05	10411.6	6139.28	CCNG1	no
gene10108	501.845	-0.114022	0.368622	-0.30932	0.757078	0.859823	524.317	402.714	499.987	403.074	416.207	989.843	429.574	469.921	380.967	NUDCD2	no
gene10109	376.643	0.17211	0.325881	0.528139	0.597403	0.750632	365.524	417.56	438.022	334.673	445.32	228.846	271.628	557.655	330.557	HMMR	no
gene10110	1918.44	0.118951	0.195322	0.608999	0.542525	0.711901	2022.36	1671.17	2382.41	1846	1903.12	1692.81	1907.43	2144.09	1696.59	MAT2B	no
gene10115	81.4388	-2.1078	0.487872	-4.3204	1.56e-05	0.000292674	34.9544	32.4769	8.54678	73.2861	122.921	63.5076	133.802	97.3493	166.105	LOC106990422	down
gene10116	8596.32	-0.563609	0.509766	-1.10562	0.26889	0.457811	6831.1	8309.45	4416.55	11179.4	13975.3	1966.55	9121.66	12101.4	9465.51	LOC101120408	no
gene10119	1211.14	0.523637	0.407086	1.28631	0.198336	0.373851	1655.84	1467.03	1435.86	1360.68	1006.01	337.247	1356.13	1126.13	1155.3	WWC1	no
gene1012	1066.41	-0.27827	0.254697	-1.09255	0.27459	0.464177	828.919	911.21	1061.94	1169.32	1126.78	739.097	1070.41	1391.73	1298.26	GDAP2	no
gene10120	2487.94	-0.712682	0.32023	-2.22553	0.0260458	0.090815	2020.37	1502.29	1711.49	2263.73	2880.02	4618.54	2086.5	3152.43	2156.06	RARS	no
gene10124	1604.39	-0.322195	0.335074	-0.961562	0.33627	0.529994	983.718	1423.42	1717.9	1510.51	2018.5	947.139	1564.38	2306.34	1967.64	ZFYVE16	no
gene10125	44466.3	-1.33206	0.611984	-2.17662	0.0295086	0.0991166	30881.7	14721.3	20706.7	36837.7	43005.2	155989	23031	53834.2	21189.6	FAM151B	no
gene10127	2.07139	-0.878705	1.21931	-0.720658	0.47112	0.655295	1.9974	0.927912	1.06835	4.07145	4.31303	0	1.00603	3.60553	1.65279	ANKRD34B	no
gene10128	796.036	0.223607	0.296039	0.755328	0.450052	0.637663	878.854	792.437	968.991	461.703	892.796	672.305	683.094	1072.04	742.101	DHFR	no
gene10129	867.544	-0.316524	0.250445	-1.26384	0.206286	0.384292	686.106	795.221	755.322	1027.63	1145.11	666.83	764.582	1109.3	857.796	MSH3	no
gene1013	438.28	0.536431	0.517479	1.03662	0.299912	0.492039	357.534	637.476	663.444	575.703	461.494	78.837	436.617	302.864	430.551	WDR3	no
gene10132	307.581	-0.370434	0.355343	-1.04247	0.297194	0.488845	206.731	324.769	240.378	330.602	442.085	182.858	231.387	435.067	374.356	RASGRF2	no
gene10134	51.394	-1.48157	0.479717	-3.08843	0.00201219	0.0136644	18.9753	36.1886	14.9569	53.7432	86.2605	41.6084	44.2653	51.6793	114.869	CKMT2	no
gene10135	419.78	-0.0940787	0.215418	-0.436725	0.662311	0.797377	442.423	373.021	389.947	431.574	470.12	320.823	396.375	471.122	482.614	ZCCHC9	no
gene10137	222.369	-0.832093	0.435083	-1.91249	0.0558129	0.15588	144.811	196.717	97.2196	292.33	357.981	87.5967	263.58	251.185	309.898	ACOT12	no
gene10139	4841.88	-1.48551	0.496912	-2.98949	0.00279445	0.017467	2526.71	2621.35	1454.02	7016.74	7250.2	1353.37	6497.94	8995.8	5860.78	SSBP2	no
gene1014	3235.91	-0.755299	0.655061	-1.15302	0.248902	0.436371	3342.64	1344.54	1967.9	1523.54	3081.66	11091.9	1565.38	3613.94	1591.63	SPAG17	no
gene10140	6.63557	-1.72985	0.8156	-2.12095	0.033926	0.109141	3.99479	3.71165	0	6.51432	4.31303	13.1395	6.03617	9.61474	12.3959	LOC105606746	no
gene10141	768.384	-1.00563	0.368568	-2.72846	0.00636299	0.0323414	457.404	541.901	379.263	942.134	1010.33	389.805	920.517	1346.06	928.04	ATG10	no
gene10146	2458.34	-1.91697	0.656302	-2.92086	0.00349064	0.0206829	1510.03	394.363	682.674	8759.32	1935.47	2547.97	1090.54	3746.14	1458.58	RPS23	no
gene10147	30.0724	-1.4283	0.523133	-2.73027	0.00632817	0.032227	11.9844	18.5582	11.7518	30.1288	38.8172	65.6975	14.0844	30.0461	49.5836	ATP6AP1L	no
gene10149	6867.39	-0.321808	0.310539	-1.03629	0.300067	0.492203	7191.63	4436.35	6031.89	6135.68	8276.7	10925.5	4974.81	7428.59	6405.38	TMEM167A	no
gene10151	1020.34	-1.60171	0.51388	-3.1169	0.00182763	0.0127075	409.466	554.891	334.393	1173.39	1467.51	257.315	1346.07	1914.54	1725.51	XRCC4	no
gene10153	3566.55	-0.0440834	0.395964	-0.111332	0.911353	0.952187	2178.16	4963.4	3340.72	2233.6	4911.46	5220.76	2232.38	3793.02	3225.41	VCAN	no
gene10155	84.3649	1.07893	0.340484	3.16882	0.0015306	0.0111167	147.807	94.647	147.432	50.486	88.417	37.2286	58.3497	72.1106	62.8059	HAPLN1	no
gene10156	1859.9	0.146237	0.364633	0.401053	0.688381	0.814671	1816.63	1702.72	2443.31	1411.17	2837.97	1171.61	1187.11	2439.74	1728.82	EDIL3	no
gene10165	3416.41	-0.3463	0.387401	-0.893906	0.371372	0.564959	2650.54	3104.79	2924.07	3538.09	3788.99	1322.71	3875.22	5155.91	4387.32	RASA1	no
gene10166	1189.5	-0.65074	0.226891	-2.86807	0.00412984	0.0234156	824.925	790.581	970.059	1036.59	1330.57	1403.74	1297.78	1767.91	1283.39	CCNH	no
gene1017	1116.37	0.0215957	0.343533	0.0628635	0.949875	0.974628	922.797	1395.58	1064.07	1113.95	1458.88	527.77	1307.84	1249.92	1006.55	TBX15	no
gene10172	855.355	-0.700848	0.278002	-2.52101	0.0117017	0.0506951	544.291	839.76	426.271	1016.23	996.309	886.917	809.853	1230.69	947.873	TMEM161B	no
gene10175	2304.15	-0.920057	0.50351	-1.82729	0.0676567	0.178787	1221.41	1696.22	1416.63	2384.24	3817.03	580.328	2566.38	4256.93	2798.17	MEF2C	no
gene1018	647.684	-0.136735	0.271084	-0.504401	0.613979	0.762486	579.245	583.657	659.17	591.175	719.197	422.654	734.401	891.768	647.893	WARS2	no
gene10180	4.41372	-1.29027	1.17724	-1.09601	0.273073	0.462271	1.9974	4.63956	0	1.62858	4.31303	0	6.03617	12.0184	9.09033	LOC106991203	no
gene10183	1400.4	-0.428319	0.32466	-1.31929	0.187073	0.359983	1285.32	1091.22	1037.37	1186.42	1830.88	1261.39	1006.03	2426.52	1478.42	CETN3	no
gene10185	717.158	-0.195044	0.360082	-0.541667	0.588048	0.744514	653.149	707.069	601.48	668.533	1084.73	562.809	407.442	1108.1	661.115	POLR3G	no
gene10186	852.71	-0.243862	0.317428	-0.768246	0.442341	0.630273	590.231	706.141	981.811	624.561	877.701	908.816	666.997	1325.63	992.499	LYSMD3	no
gene10187	439.708	-0.316929	0.429402	-0.738072	0.460471	0.646555	484.369	307.139	341.871	515.446	706.258	176.288	387.321	661.014	377.662	ADGRV1	no
gene10189	4411.66	-0.153742	0.381436	-0.403061	0.686903	0.813853	3360.62	3551.12	5400.5	4933.79	4990.17	1757.41	4825.92	5560.93	5324.45	ARRDC3	no
gene1019	1.95567	-3.9855	1.70397	-2.33895	0.0193379	0.0732358	0	0	0	3.25716	2.15651	6.56975	2.01206	3.60553	0	HAO2	no
gene10194	292.603	-0.381423	0.328724	-1.16032	0.24592	0.432561	230.699	248.68	251.062	225.558	467.963	268.265	410.46	204.313	326.425	NR2F1	no
gene10195	8767.85	-1.55331	0.413782	-3.75393	0.000174085	0.0020048	5066.4	3166.96	3253.12	11861.8	9310.75	20435.2	6768.56	12751.6	6296.29	FAM172A	down
gene10197	1102.27	-1.26978	0.497476	-2.55243	0.0106973	0.0475264	660.139	665.313	378.195	1394.07	1548.38	324.108	1216.29	2254.66	1479.24	KIAA0825	no
gene1020	10.9594	-0.357221	0.844191	-0.423152	0.672184	0.804402	11.9844	9.27912	6.41008	5.70003	20.4869	0	23.1387	8.4129	13.2223	HSD3B1	no
gene10200	742.055	-0.741427	0.469707	-1.57849	0.114453	0.255687	549.284	514.991	473.278	890.02	1061	199.283	764.582	1139.35	1086.71	SLF1	no
gene10201	1634.91	-1.82983	0.540763	-3.38379	0.000714923	0.00615097	679.115	759.032	376.058	1513.77	2567.33	409.515	3201.18	2648.86	2559.34	MCTP1	down
gene10207	3.64473	-0.546582	1.17313	-0.46592	0.641273	0.784233	1.9974	0	6.41008	4.07145	5.39128	0	2.01206	9.61474	3.30557	FAM81B	no
gene10208	1128.49	0.0226306	0.511714	0.0442251	0.964725	0.983162	726.054	1145.97	1549.1	1411.98	1418.99	228.846	1080.48	1402.55	1192.49	TTC37	no
gene10209	248.352	-1.13967	0.326922	-3.48605	0.000490208	0.004623	121.841	149.394	142.09	266.273	212.417	216.802	284.706	461.508	380.141	ARSK	down
gene1021	25.4425	1.06247	0.469905	2.26103	0.0237574	0.0849031	15.9792	53.8189	47.0073	18.7287	17.2521	13.1395	24.1447	24.0369	14.8751	ZNF697	no
gene10211	2.63603	-0.535059	1.28903	-0.415088	0.678078	0.808467	1.9974	0.927912	3.20504	1.62858	0	0	9.05426	3.60553	3.30557	GPR150	no
gene10213	197.784	-0.797631	0.404408	-1.97234	0.0485703	0.141185	179.766	107.638	110.04	171.001	219.964	447.838	180.079	193.497	170.237	RFESD	no
gene10214	460.066	-1.18076	0.366183	-3.2245	0.00126193	0.00962603	207.729	377.66	162.389	492.646	648.032	319.728	595.569	731.922	604.92	SPATA9	down
gene10215	2990.76	-0.492796	0.294834	-1.67144	0.0946355	0.224084	1705.78	2690.02	2661.25	3084.53	3594.91	2310.36	2978.85	3121.19	4769.94	RHOBTB3	no
gene10216	577.754	-0.123209	0.679391	-0.181352	0.856092	0.919801	898.828	192.078	544.857	328.159	181.147	483.972	556.334	1694.6	319.814	GLRX	no
gene10217	2503.1	-1.08415	0.482195	-2.24836	0.0245535	0.0869702	1168.48	1416.92	1713.63	3449.33	4060.71	752.237	2381.27	4649.93	2935.35	ELL2	no
gene10219	33.9072	-2.18245	0.567139	-3.84818	0.000119	0.00149358	11.9844	5.56747	12.8202	46.4146	73.3214	24.0891	19.1146	69.7069	42.1461	LOC105607634	down
gene1022	2225.07	0.267963	0.508415	0.527055	0.598155	0.751233	2865.27	2089.66	2570.44	1610.67	1948.41	5118.93	1040.23	1697	1085.05	PHGDH	no
gene10222	23.5807	-1.53146	0.824917	-1.8565	0.0633817	0.170324	3.99479	17.6303	9.61513	8.9572	37.739	2.18992	42.2532	33.6516	56.1948	PCSK1	no
gene10224	5877.07	0.592338	0.312902	1.89304	0.0583521	0.160704	7631.05	6573.33	8530.75	5131.66	5558.41	2451.61	5465.76	5995.99	5555.02	CAST	no
gene10225	1044.47	0.133962	0.351129	0.381519	0.702818	0.823533	1248.37	1021.63	1059.8	668.533	796.832	1807.78	879.269	1092.48	825.567	ERAP1	no
gene10226	181.2	0.494297	0.583041	0.847791	0.396554	0.588698	124.837	246.825	302.342	191.358	173.599	20.8042	181.085	227.148	162.8	ERAP2	no
gene10227	3573.95	0.278295	0.340562	0.817164	0.413835	0.604348	3455.5	3889.81	4796.88	3732.71	3426.7	1467.24	3934.58	3887.96	3574.15	LNPEP	no
gene10229	5.22752	-0.455034	1.09696	-0.414813	0.678278	0.808579	0.998698	8.35121	3.20504	11.4001	2.15651	0	12.0723	7.21106	1.65279	LOC101110759	no
gene1023	23.6068	-0.0659177	0.451184	-0.1461	0.883843	0.937144	32.957	16.7024	19.2303	31.7573	10.7826	20.8042	28.1688	26.4405	25.6182	HMGCS2	no
gene10230	129.474	0.687299	0.483844	1.4205	0.155463	0.315835	221.711	121.556	176.277	134.358	59.3041	58.0328	80.4823	225.946	87.5977	LIX1	no
gene10231	1152.94	-0.946712	0.271305	-3.48948	0.000483959	0.00457866	765.003	710.781	661.307	1180.72	1381.25	2102.32	1119.71	1140.55	1314.79	RIOK2	no
gene10234	531.043	-0.726955	0.587256	-1.23788	0.215759	0.396937	365.524	502.928	240.378	1050.43	272.799	136.87	978.866	754.757	476.829	RGMB	no
gene10235	3314.91	0.546678	0.268383	2.03693	0.0416572	0.126388	4438.21	3869.39	4285.14	3025.9	2386.18	2009.25	4091.52	3103.16	2625.45	RGMB	no
gene10236	3175.79	-0.440899	0.435107	-1.01331	0.310911	0.503434	2610.6	2574.96	2508.48	3758.77	4207.36	983.273	2958.73	4276.16	4703.83	CHD1	no
gene1024	1.39568	-2.44171	1.6668	-1.46491	0.142945	0.298217	0.998698	0	0	1.62858	3.23477	0	3.01809	1.20184	2.47918	REG4	no
gene10242	168.883	-0.0220224	0.319409	-0.0689472	0.945032	0.972017	187.755	154.033	159.184	102.601	185.46	136.87	169.013	254.791	170.237	FAM174A	no
gene10244	680.046	-0.484523	0.419898	-1.15391	0.248538	0.435924	413.461	506.64	691.221	697.033	793.597	283.594	753.516	1260.73	720.615	ST8SIA4	no
gene10247	49.0169	-0.20253	0.743297	-0.272475	0.785257	0.875488	25.9662	57.5305	50.2123	46.4146	71.1649	2.18992	95.5728	27.6424	64.4587	SLCO4C1	no
gene10248	4.89496	-2.76598	1.17015	-2.36378	0.0180894	0.0697267	2.99609	0	0	4.88574	4.31303	12.0445	2.01206	12.0184	5.78475	SLCO6A1	no
gene10251	3470.19	-0.39325	0.337999	-1.16346	0.244642	0.43103	2174.17	2753.11	3684.73	3562.52	4584.75	1982.97	3819.89	3515.39	5154.22	PAM	no
gene10254	331.379	-0.88066	0.297297	-2.96223	0.00305424	0.0187154	198.741	233.834	204.054	303.73	452.868	250.746	506.033	479.535	352.87	GIN1	no
gene10255	2283.36	-0.319807	0.354765	-0.901462	0.367343	0.560611	1689.8	2239.05	1948.67	2628.53	2949.03	1110.29	2097.57	3470.92	2416.37	PPIP5K2	no
gene10256	372.119	-0.328821	0.313353	-1.04936	0.294011	0.485317	293.617	304.355	355.76	400.631	345.042	213.517	453.719	531.215	451.211	C5H5orf30	no
gene10258	502.695	0.113272	0.348565	0.324967	0.745206	0.852062	471.386	428.695	688.016	493.46	423.755	256.22	593.557	703.078	466.086	NUDT12	no
gene10266	8730.15	-1.82301	0.708563	-2.57283	0.0100872	0.045487	3505.43	4546.77	1676.24	15275.3	11359.4	556.239	14156.8	15780.2	11715	EFNA5	no
gene10267	5099.79	-0.743548	0.448374	-1.65832	0.097253	0.228101	3346.64	3678.24	3529.82	5858.82	6904.08	1529.66	5885.27	8603.99	6561.56	FBXL17	no
gene10268	3956.01	-1.27907	0.492082	-2.59929	0.0093416	0.0429805	1854.58	2348.55	1879.22	5461.45	5756.81	969.039	5240.4	6729.12	5364.95	FER	no
gene10269	4202.69	0.0482523	0.366231	0.131754	0.895179	0.942579	3703.17	4130.14	5057.56	4112.17	4656.99	1659.96	4198.16	5428.72	4877.37	PJA2	no
gene1027	0.404968	-1.7412	3.51576	-0.495257	0.620418	0.767976	0	0	0	2.44287	0	0	0	1.20184	0	LOC101112695	no
gene10271	2487.36	-0.187014	0.396872	-0.471219	0.637484	0.781798	1741.73	2536.91	2553.35	2914.35	3128.02	948.234	2461.75	2507.04	3594.81	MAN2A1	no
gene10273	161.304	-1.48588	0.498058	-2.98336	0.00285104	0.0177211	73.9037	59.3864	86.5361	131.101	164.973	82.1219	248.489	437.471	167.758	TMEM232	no
gene10275	721.336	0.373196	0.32374	1.15277	0.249007	0.436511	550.283	963.173	1038.43	728.79	636.171	386.52	623.738	837.685	727.226	SLC25A46	no
gene10277	1020.8	-0.276443	0.296755	-0.931555	0.351567	0.545918	637.169	1062.46	985.016	1365.57	1144.03	682.159	945.667	1171.8	1193.31	WDR36	no
gene10278	11.2402	-1.45457	0.762787	-1.90692	0.0565314	0.157226	4.99349	8.35121	2.13669	16.2858	25.8782	2.18992	8.04823	19.2295	14.0487	LOC106991207	no
gene1028	4689.04	0.284438	0.38022	0.748088	0.454407	0.641593	4053.72	6251.34	5667.58	5086.87	5017.13	1707.04	3870.19	5413.1	5134.38	NOTCH2	no
gene10280	252.9	-0.996589	0.277533	-3.59088	0.000329561	0.00338482	136.822	111.349	208.328	318.388	243.686	371.191	304.827	311.277	270.231	CAMK4	no
gene10281	1890.83	0.241869	0.34932	0.6924	0.488686	0.670812	1710.77	1875.31	2737.11	1817.5	1709.04	895.676	1760.55	2662.08	1849.47	STARD4	no
gene10285	6.27851	0.739668	0.889314	0.831728	0.405562	0.597278	14.9805	6.49538	4.27339	7.32861	2.15651	0	3.01809	10.8166	7.43754	APELA	no
gene10291	207.755	-1.15114	0.452498	-2.54397	0.0109601	0.0483553	60.9206	115.989	166.662	176.701	241.529	127.015	299.797	439.875	241.307	2021-03-01	no
gene10293	1.68648	-3.79267	1.95619	-1.9388	0.0525255	0.149394	0	0	0	5.70003	0	0	3.01809	4.80737	1.65279	TKTL2	no
gene10294	43.1811	0.107789	0.682854	0.157851	0.874574	0.931428	31.9583	38.9723	65.1692	34.2002	51.7563	2.18992	67.4039	56.4866	40.4933	NPY5R	no
gene10296	102.871	-0.303529	0.476436	-0.637082	0.524072	0.697688	45.9401	83.5121	137.817	152.272	138.017	38.3236	113.681	99.753	116.521	NPY1R	no
gene10297	781.023	-0.352347	0.264925	-1.32999	0.183522	0.354701	625.185	756.248	597.206	944.577	740.762	609.892	785.709	792.015	1177.61	NAF1	no
gene10298	187.049	0.144609	0.238364	0.606672	0.544069	0.712917	169.779	220.843	208.328	187.287	172.521	191.618	133.802	219.937	179.327	BBS7	no
gene10299	383.398	0.962611	0.336256	2.86273	0.00420006	0.0237087	530.309	631.908	540.584	336.302	336.416	454.408	200.2	203.111	217.341	CCNA2	no
gene1030	1924.01	-0.366414	0.227487	-1.6107	0.107245	0.244366	1597.92	1421.56	1819.4	1738.51	1959.19	2124.22	1859.14	2808.71	1987.48	SEC22B	no
gene10300	1013.85	-0.808023	0.198577	-4.06905	4.72e-05	0.000720622	766.002	705.213	555.541	1142.45	1206.57	1137.66	1014.08	1229.49	1367.68	EXOSC9	no
gene10303	3.37214	0.0993753	1.11949	0.0887686	0.929266	0.963109	3.99479	6.49538	0	2.44287	3.23477	0	2.01206	7.21106	4.95836	TMEM155	no
gene10304	1563.48	0.551198	0.309507	1.78089	0.0749305	0.191732	1485.06	1872.53	2592.88	978.777	1542.99	1117.95	1344.05	1169.39	1967.64	ANXA5	no
gene10307	76.903	-0.956216	0.527675	-1.81213	0.069966	0.183447	36.9518	56.6026	48.0756	67.5861	214.573	41.6084	72.4341	99.753	54.542	QRFPR	no
gene10308	84.8254	-0.0288924	0.526103	-0.0549178	0.956204	0.978634	106.861	57.5305	86.5361	66.7718	58.2259	213.517	64.3859	62.4958	47.1044	TNIP3	no
gene10309	123.341	0.424093	0.490966	0.863793	0.387701	0.580261	91.8802	205.069	148.5	80.6148	170.365	35.0387	153.922	134.606	90.0769	NDNF	no
gene1031	749.447	0.130284	0.244348	0.533189	0.593903	0.74795	585.237	823.058	977.538	789.862	640.484	903.341	688.124	675.436	661.941	LOC101112864	no
gene10310	887.538	-1.23858	0.531103	-2.33208	0.0196963	0.0741146	423.448	714.492	258.54	1357.42	1558.08	235.416	971.824	1270.35	1198.27	PRDM5	no
gene10312	477.082	0.0979529	0.234878	0.417037	0.676651	0.807579	585.237	396.218	514.943	450.303	479.824	556.239	404.424	526.407	380.141	MAD2L1	no
gene10313	770.124	-1.56484	0.392965	-3.98214	6.83e-05	0.000964074	284.629	370.237	347.213	815.919	1345.66	390.9	938.625	1050.41	1387.51	PDE5A	down
gene10314	1.03427	-0.946159	1.60001	-0.591348	0.554288	0.720348	0.998698	0.927912	0	2.44287	1.07826	0	1.00603	1.20184	1.65279	FABP2	no
gene10315	2793.65	-0.833234	0.494788	-1.68402	0.0921775	0.219923	2114.24	1446.61	1948.67	1701.05	2889.73	7307.75	1663.97	3928.82	2142.01	C6H4orf3	no
gene10317	1297.22	-1.10558	0.584247	-1.89233	0.0584476	0.1609	589.232	811.923	800.192	2043.05	1631.4	174.098	1516.09	2124.86	1984.17	USP53	no
gene10319	163.217	-1.7221	0.661089	-2.60494	0.00918899	0.0425054	89.8828	72.3771	30.9821	157.972	210.26	20.8042	226.357	328.103	332.21	MYOZ2	no
gene10320	3122.74	-0.188021	0.371722	-0.50581	0.61299	0.761965	2517.72	2635.27	3419.78	3589.39	3668.23	1332.56	4350.07	3857.92	2733.71	SYNPO2	no
gene10323	1786.37	-0.51368	0.365348	-1.406	0.159723	0.321876	909.814	1596.01	1664.49	2196.96	2457.35	927.43	1771.62	2082.79	2470.92	SEC24D	no
gene10324	1086.34	-0.450353	0.202948	-2.21905	0.026483	0.0918167	880.852	833.265	904.89	1187.24	1277.73	1018.31	1032.19	1507.11	1135.46	METTL14	no
gene10326	354.748	-0.571338	0.294783	-1.93817	0.0526028	0.149579	250.673	369.309	183.756	475.546	382.781	297.829	444.665	348.534	439.641	PRSS12	no
gene10329	224.314	-0.962756	0.500036	-1.92537	0.0541826	0.152702	111.854	177.231	122.86	215.787	455.024	78.837	204.224	415.838	237.175	NDST3	no
gene10332	6.23212	-0.713498	0.870006	-0.820106	0.412156	0.603236	0.998698	5.56747	6.41008	4.07145	3.23477	14.2345	3.01809	14.4221	4.13197	TRAM1L1	no
gene10334	109.802	1.39742	0.505657	2.76357	0.00571734	0.0298526	200.738	150.322	211.533	175.887	53.9128	55.8429	52.3135	37.2571	50.41	LOC101112318	no
gene10341	25.885	-2.98714	0.639014	-4.67461	2.95e-06	7.12e-05	1.9974	7.4233	4.27339	52.1146	19.4086	42.7034	29.1748	57.6885	18.1807	NDST4	down
gene10342	43.2736	-1.16183	0.629086	-1.84685	0.0647689	0.173009	19.974	22.2699	28.8454	35.8288	63.6171	6.56975	61.3678	99.753	51.2364	UGT8	no
gene10347	493.638	-0.896468	0.584829	-1.53287	0.125307	0.271731	223.708	331.265	385.673	467.403	654.502	89.7866	425.55	1062.43	802.428	ARSJ	no
gene10348	4362.26	-1.05169	0.499613	-2.105	0.0352913	0.112266	2832.31	2574.96	2222.16	4907.73	5090.45	1054.45	5935.57	7700.21	6942.53	CAMK2D	no
gene10351	2406.31	-1.3776	0.39386	-3.4977	0.000469291	0.00446606	991.707	1624.77	878.182	2643.19	4506.03	1397.17	2596.56	3110.37	3908.84	ANK2	down
gene10354	2343.28	-0.585157	0.492304	-1.18861	0.234594	0.419328	2596.62	1340.83	1334.37	2266.17	4040.23	707.343	2272.62	3461.31	3070.05	LARP7	no
gene10356	245.26	-0.457285	0.235084	-1.9452	0.0517512	0.147915	172.775	257.96	158.115	287.445	240.451	257.315	265.592	290.846	276.842	ZGRF1	no
gene10357	1.02418	2.83146	2.28516	1.23907	0.215321	0.396332	1.9974	5.56747	0	0	0	0	0	0	1.65279	NEUROG2	no
gene10358	573.711	-0.892716	0.387936	-2.30119	0.0213807	0.0786246	329.57	410.137	355.76	670.975	751.545	237.606	783.697	847.299	776.81	ALPK1	no
gene1036	5.94078	-1.26584	1.08367	-1.16811	0.242764	0.428848	1.9974	1.85582	5.34174	2.44287	2.15651	29.5639	4.02412	3.60553	2.47918	LOC101112943	no
gene10361	143.036	0.0998448	0.403476	0.247462	0.804551	0.886979	126.835	180.015	142.09	99.3434	128.313	60.2227	164.989	210.323	175.195	TIFA	no
gene10362	1845.64	-0.296397	0.421872	-0.702576	0.48232	0.665641	1537	1489.3	1779.87	1908.7	1939.78	632.886	1918.5	3087.53	2317.21	AP1AR	no
gene10363	573.753	-0.353188	0.335477	-1.05279	0.292435	0.48339	457.404	405.498	589.728	441.345	573.632	369.001	721.323	889.364	716.483	C6H4orf32	no
gene10367	23.026	0.49839	0.411914	1.20994	0.226303	0.410239	24.9675	26.9094	34.1871	19.543	12.9391	27.374	26.1568	12.0184	23.139	PITX2	no
gene10368	88.6148	-1.04634	0.423733	-2.46933	0.0135365	0.0565738	42.944	69.5934	42.7339	53.7432	162.817	85.4068	89.5366	93.7438	157.015	ENPEP	no
gene10371	3272.56	-0.11441	0.23699	-0.482762	0.629265	0.775037	2920.19	2700.22	3685.8	3317.42	3143.12	3273.93	2524.13	3543.03	4345.18	ELOVL6	no
gene10373	10.1146	-4.47629	1.12302	-3.98595	6.72e-05	0.000954054	0	0.927912	1.06835	10.5858	14.0173	18.6143	10.0603	19.2295	16.5279	EGF	down
gene10374	1.87292	-0.23802	1.40686	-0.169185	0.865651	0.925825	2.99609	0	2.13669	4.07145	2.15651	2.18992	0	0	3.30557	LRIT3	no
gene10375	65.8472	-1.11766	0.412469	-2.70969	0.00673463	0.0337931	37.9505	55.6747	17.0936	106.672	61.4606	62.4127	64.3859	98.5511	88.4241	RRH	no
gene10376	560.616	0.268095	0.39167	0.684492	0.493664	0.674501	761.008	583.657	551.267	377.831	448.555	1057.73	405.43	401.416	458.648	GAR1	no
gene10377	174.649	-2.30626	0.457595	-5.03995	4.66e-07	1.52e-05	57.9245	36.1886	50.2123	283.373	169.286	140.155	263.58	444.682	126.438	CFI	down
gene10378	1382.61	0.221617	0.278934	0.794514	0.426896	0.615352	1380.2	1385.37	1817.26	1233.65	1210.88	886.917	1739.42	1634.51	1155.3	PLA2G12A	no
gene10379	1291.22	-0.278645	0.338774	-0.822511	0.410786	0.602125	1413.16	698.718	1279.88	1479.57	1263.72	1456.3	1105.63	2005.88	918.123	CASP6	no
gene1038	611.383	-0.475625	0.240712	-1.97591	0.0481649	0.14033	467.391	512.207	475.415	502.417	655.58	906.626	674.039	586.499	722.268	PRKAB2	no
gene10382	1940.93	-0.757184	0.270662	-2.79753	0.00514952	0.0275853	1456.1	1379.81	1151.68	1938.01	2443.33	3282.69	1711.26	1883.29	2222.17	CCDC109B	no
gene10383	1831.1	-0.148833	0.248987	-0.597756	0.550003	0.717311	1372.21	1883.66	1866.4	1857.4	2047.61	1343.51	1666.99	2215	2227.13	SEC24B	no
gene10385	349.692	-1.84221	0.461091	-3.99532	6.46e-05	0.000921501	194.746	98.3587	91.8779	398.188	575.789	459.883	230.381	824.464	273.536	COL25A1	down
gene10388	207.827	-0.0555372	0.477616	-0.11628	0.907431	0.949903	237.69	204.141	165.594	250.801	244.764	417.179	127.766	124.992	97.5144	ETNPPL	no
gene10389	2636.3	-0.858752	0.374174	-2.29506	0.0217297	0.0795658	1958.45	1515.28	1653.8	2079.7	3388.96	3986.74	2114.67	5070.58	1958.55	OSTC	no
gene1039	1110.12	-0.287713	0.395306	-0.727826	0.46672	0.651975	822.927	843.472	1237.15	1546.34	808.692	497.111	1446.67	1445.82	1342.89	FMO5	no
gene10390	546.078	-1.76992	0.294947	-6.00081	1.96e-09	1.49e-07	244.681	263.527	119.655	683.19	671.754	875.967	747.48	688.656	619.795	RPL34	down
gene10391	3674.4	-0.56192	0.359113	-1.56474	0.117643	0.260195	2786.37	3208.72	2371.73	5415.03	6381.12	2829.37	2325.94	3758.16	3993.13	LEF1	no
gene10392	5052.21	0.617222	0.33671	1.8331	0.0667882	0.176992	8567.83	3833.2	7335.27	4104.02	2999.71	5016.01	5142.82	5247.25	3223.76	HADH	no
gene10393	1734.2	0.141965	0.326892	0.434286	0.664081	0.798601	1222.41	2428.35	1898.45	1810.98	1870.78	2394.67	1378.26	1158.58	1445.36	LOC101120834	no
gene10395	969.907	-0.538046	0.363818	-1.47889	0.13917	0.292818	677.117	739.546	819.422	844.419	1403.89	514.631	953.715	1192.23	1584.2	SGMS2	no
gene10397	1682.72	0.799462	0.25925	3.08375	0.0020441	0.0138282	1952.45	2582.38	2511.68	1433.15	1475.05	897.866	1369.21	1718.64	1204.06	PAPSS1	no
gene1040	1103.02	-0.965296	0.376645	-2.56288	0.0103807	0.0465624	723.057	801.716	498.918	1277.62	1776.97	561.714	1186.11	1697	1404.04	CHD1L	no
gene10400	1440.4	-0.71344	0.587657	-1.21404	0.224731	0.408431	871.864	999.361	1158.09	1635.91	1786.67	192.713	2776.64	2077.99	1464.37	DKK2	no
gene10401	93.6929	-0.646688	0.44008	-1.46948	0.141703	0.296357	102.866	66.8097	34.1871	69.2147	105.669	60.2227	129.778	153.836	120.653	GIMD1	no
gene10402	961.307	-0.735581	0.286827	-2.56454	0.0103311	0.0463752	811.942	586.44	599.343	1091.15	1291.75	893.486	848.082	1592.44	937.13	AIMP1	no
gene10403	939.21	-0.75736	0.426409	-1.77613	0.0757108	0.192853	541.294	753.465	634.598	949.463	1269.11	360.241	1116.69	1733.06	1094.97	TBCK	no
gene10405	711.172	0.0600356	0.409186	0.14672	0.883353	0.936792	602.215	753.465	837.584	627.818	711.649	237.606	974.842	786.005	869.366	NPNT	no
gene10407	307430	3.17948	0.285315	11.1438	7.68e-29	3.41e-25	600465	770617	895435	84749.7	97993	113681	63712.8	80611.2	59600.3	GSTCD	up
gene10408	606.683	-0.51381	0.24147	-2.12784	0.0333505	0.107894	441.425	471.379	503.192	646.547	782.814	473.022	782.691	773.987	585.087	INTS12	no
gene10409	100.298	-1.54543	0.47988	-3.22044	0.00127992	0.00972151	29.9609	61.2422	40.5972	97.7149	215.651	47.0832	142.856	163.451	104.126	ARHGEF38	down
gene10410	1331.61	-0.506881	0.289616	-1.75019	0.080086	0.200136	1213.42	1054.11	851.473	1491.78	1751.09	1052.26	1144.86	2074.38	1351.15	PPA2	no
gene10412	3017.41	-0.509035	0.368127	-1.38277	0.166735	0.331713	2029.35	2537.84	2493.52	3520.99	3459.05	1306.29	3382.27	4387.93	4039.41	TET2	no
gene10413	43087.8	-1.04137	0.445483	-2.33763	0.0194066	0.0733395	38332	15917.4	21544.3	40817.1	54319.3	69660.2	29859.9	87485.8	29854.3	LOC105612165	no
gene10414	45.971	0.693155	0.391753	1.76937	0.0768328	0.194497	66.9128	53.8189	64.1008	47.2289	56.0693	21.8992	27.1628	49.2756	27.271	CXXC4	no
gene10415	289.867	-0.026731	0.585339	-0.0456676	0.963575	0.982484	324.577	254.248	279.907	121.329	210.26	821.219	162.977	157.441	276.842	TACR3	no
gene10418	1008.57	0.0436543	0.389048	0.112208	0.910659	0.951879	1147.5	987.298	951.898	932.363	1659.44	544.195	690.136	1396.54	767.72	CENPE	no
gene10419	934.686	-1.18215	0.23444	-5.04245	4.6e-07	1.5e-05	577.248	506.64	434.817	1220.62	1360.76	1016.12	843.052	1296.79	1156.12	BDH2	down
gene10420	181.987	-0.376343	0.236841	-1.58901	0.112058	0.25208	112.853	165.168	177.346	188.101	178.991	183.953	218.308	224.745	188.418	SLC9B2	no
gene10422	398.273	-2.36253	0.674229	-3.50405	0.000458233	0.00439142	140.816	116.917	59.8275	563.489	512.172	36.1336	611.666	745.143	798.296	SLC9B1	down
gene10423	1244.83	0.104133	0.371787	0.280086	0.779411	0.874836	1304.3	1210.93	1400.6	857.448	1661.59	709.533	986.914	2011.89	1060.26	CISD2	no
gene10425	5256.28	-0.621254	0.243981	-2.54632	0.0108864	0.0480957	4171.56	3682.88	3749.9	5025.8	6177.33	6975.98	4564.35	7814.38	5144.3	UBE2D3	no
gene10426	486.598	-1.49036	0.358749	-4.15432	3.26e-05	0.000533493	165.784	244.969	251.062	949.463	659.893	316.443	510.057	632.169	649.545	MANBA	down
gene10427	2432.18	-0.645532	0.34469	-1.87279	0.0610974	0.16607	1625.88	1899.44	1776.66	3048.7	2730.15	1202.26	2673.02	3576.68	3356.81	NFKB1	no
gene10430	3823.7	0.758032	0.290652	2.60804	0.00910633	0.0422	5593.71	4402.01	5771.21	3231.92	3672.54	1924.94	2605.62	4214.86	2996.5	SLC39A8	no
gene10432	227.212	-1.30836	0.338873	-3.86091	0.000112964	0.0014298	84.8893	127.124	131.407	277.673	263.095	159.864	303.821	421.847	275.189	BANK1	down
gene10435	3933.02	-0.300622	0.396393	-0.758393	0.448216	0.636041	3635.26	2838.48	3746.69	3850.78	5464.6	1567.98	4426.53	6046.47	3820.42	PPP3CA	no
gene10438	1114.28	-1.76255	0.289853	-6.08084	1.2e-09	1.01e-07	370.517	430.551	487.166	1314.26	1902.04	929.62	1399.39	1310.01	1885	EMCN	down
gene10440	103.164	-0.16503	0.300452	-0.549271	0.582819	0.740693	94.8763	74.233	117.518	99.3434	128.313	111.686	135.814	73.3124	93.3825	DDIT4L	no
gene10442	0.544972	-0.890321	2.42773	-0.366731	0.71382	0.830221	0	0.927912	0	0.814291	2.15651	0	1.00603	0	0	LOC106990491	no
gene10443	4926.64	-0.688679	0.343427	-2.00532	0.0449294	0.13351	4430.23	2835.7	3231.75	4643.08	5793.47	7684.42	3624.72	8064.37	4031.97	H2AFZ	no
gene10444	1225.79	-0.518132	0.456428	-1.13519	0.256296	0.444594	752.02	965.028	1137.79	1161.18	1380.17	460.978	1137.82	2558.72	1478.42	DNAJB14	no
gene10445	1641.24	-0.474594	0.342475	-1.38578	0.165815	0.33055	1528.01	1113.49	1267.06	1799.58	1837.35	979.988	1535.2	2918.07	1792.45	LAMTOR3	no
gene10446	781.243	-1.42496	0.567985	-2.5088	0.0121141	0.0520248	365.524	274.662	463.663	1156.29	518.641	198.188	1393.35	1779.93	880.935	DAPP1	no
gene10447	12.3635	0.550681	0.556006	0.990423	0.321967	0.51574	7.98959	18.5582	20.2986	12.2144	11.8608	9.85463	5.03014	18.0276	7.43754	LOC105612764	no
gene10448	4.89407	-1.50972	1.22133	-1.23613	0.216412	0.397681	0	6.49538	0	4.88574	2.15651	12.0445	2.01206	2.40369	14.0487	MTTP	no
gene10449	172.561	-0.130755	0.380682	-0.343474	0.731242	0.842496	110.855	215.276	160.252	140.058	258.782	130.3	124.748	263.204	149.577	TRMT10A	no
gene1045	409.523	0.662679	0.302639	2.18967	0.0285481	0.0969696	464.395	527.054	636.735	280.116	383.859	200.377	411.466	436.269	345.432	BCL9	no
gene10451	185.849	-1.40747	0.517455	-2.71998	0.00652863	0.0330018	83.8906	129.908	51.2807	257.316	268.486	52.558	244.465	326.901	257.835	C6H4orf17	no
gene10453	618.945	-2.49656	0.786292	-3.17511	0.00149781	0.0109412	127.833	150.322	175.209	1444.55	243.686	96.3564	517.099	2422.92	392.537	ADH1C	no
gene10454	1084.63	0.0290068	0.543132	0.0534066	0.957408	0.979198	1121.54	1315.78	860.02	844.419	677.145	2920.26	577.461	813.648	631.365	LOC101122865	no
gene10455	2245.68	-0.35714	0.253944	-1.40637	0.159614	0.321691	2026.36	1576.52	2071.53	2150.54	2265.42	3519.2	2004.01	2318.36	2279.19	LOC101112223	no
gene10456	913.166	0.500264	0.283825	1.76258	0.0779718	0.196561	1000.7	1117.21	1287.36	1059.39	956.414	512.441	673.033	734.326	877.63	METAP1	no
gene10458	0.617204	0.134565	2.75279	0.0488832	0.961012	0.980898	1.9974	0	0	0	1.07826	0	0	0	2.47918	LOC101112481	no
gene10459	3470.56	-0.214123	0.32392	-0.661036	0.508589	0.685765	2955.15	2972.1	3480.68	3263.68	4429.48	2124.22	2909.44	5510.45	3589.85	EIF4E	no
gene1046	985.584	0.0608637	0.435697	0.139693	0.888903	0.93984	1240.38	976.163	823.696	977.963	715.962	2041	856.131	717.5	521.454	ACP6	no
gene10464	1283.5	-0.79858	0.307751	-2.59489	0.00946202	0.0433393	818.933	1133.91	626.052	1592.75	1945.17	1035.83	1116.69	1586.43	1695.76	TSPAN5	no
gene10466	1759.8	-0.688013	0.350362	-1.96372	0.0495622	0.143226	1180.46	1425.27	1145.27	2058.53	2382.95	948.234	1839.02	2994.99	1863.52	RAP1GDS1	no
gene10467	5.49677	-4.4969	1.30955	-3.43393	0.00059489	0.00536942	0.998698	0	0	7.32861	11.8608	6.56975	6.03617	8.4129	8.26394	LOC101102064	down
gene10468	15.5718	-4.51956	1.16477	-3.88022	0.000104363	0.00135079	2.99609	0	0	43.9717	5.39128	24.0891	5.03014	39.6608	19.0071	LOC106990267	down
gene10471	199.194	-2.16084	0.551983	-3.91469	9.05e-05	0.0012059	62.918	79.8004	37.3922	245.916	597.354	104.021	120.723	301.663	242.96	UNC5C	down
gene10476	608.218	-1.11686	0.677436	-1.64865	0.0992188	0.231042	318.585	383.228	323.709	704.361	690.084	41.6084	900.396	1311.21	800.775	BMPR1B	no
gene10478	4365.99	-0.591311	0.408529	-1.44742	0.14778	0.305718	2716.46	3565.04	3509.52	4825.49	6563.35	1643.53	4920.49	6632.97	4917.04	PDLIM5	no
gene10479	67.3933	-0.239037	0.878919	-0.271967	0.785648	0.875488	32.957	62.1701	85.4678	51.3003	64.6954	0	84.5064	84.129	141.313	HPGDS	no
gene10481	1168.18	-0.296762	0.441242	-0.672559	0.501228	0.680107	852.888	1047.61	1141	1457.58	1303.61	356.957	1145.87	1891.7	1316.44	SMARCAD1	no
gene10484	4.52012	0.492016	0.836857	0.587933	0.556578	0.722123	3.99479	6.49538	6.41008	8.14291	1.07826	7.66471	2.01206	2.40369	2.47918	LOC101102814	no
gene10485	2.27949	1.92979	1.87668	1.0283	0.30381	0.496052	0	10.207	3.20504	1.62858	0	5.47479	0	0	0	ATOH1	no
gene10486	292.117	-2.36698	0.441793	-5.35765	8.43e-08	3.57e-06	84.8893	63.098	84.3994	277.673	423.755	170.814	294.766	618.949	610.705	GRID2	down
gene10489	1508.06	-2.23472	0.54226	-4.12112	3.77e-05	0.000597813	528.311	527.054	247.857	1872.05	2486.46	375.571	1992.94	3075.52	2466.78	CCSER1	down
gene1049	346.055	0.354355	0.558134	0.634892	0.525499	0.698802	408.468	421.272	384.605	153.087	450.711	696.394	164.989	109.368	325.599	GJA5	no
gene10494	993.997	-2.81723	0.415884	-6.77408	1.25e-11	1.85e-09	154.798	154.961	283.112	701.918	1571.02	1688.43	1395.36	846.097	2150.28	MMRN1	down
gene10495	148.935	-1.13594	0.275251	-4.12691	3.68e-05	0.000588427	85.888	90.0075	72.6476	164.487	199.477	151.104	170.019	151.432	255.356	SNCA	down
gene10496	102.001	-1.08226	0.486519	-2.2245	0.0261145	0.0909476	43.9427	57.5305	73.716	118.072	107.826	81.027	81.4883	280.029	74.3754	GPRIN3	no
gene10497	241.92	-0.176595	0.271212	-0.651134	0.51496	0.690268	231.698	203.213	232.9	318.388	258.782	314.253	201.206	239.167	177.675	TIGD2	no
gene10498	2522.51	-1.31784	0.505258	-2.60826	0.00910034	0.0421876	1123.54	1677.66	991.426	3346.73	4247.25	647.121	2760.54	3692.06	4216.26	FAM13A	no
gene10499	1911.99	-0.466784	0.414295	-1.1267	0.259871	0.447995	1137.52	1675.81	1758.5	2692.04	2117.7	678.874	2224.33	2490.22	2432.9	HERC3	no
gene10503	760.538	-0.70307	0.456828	-1.53903	0.123798	0.269445	521.32	674.592	412.382	1005.65	761.249	232.131	1091.54	1070.84	1075.14	HERC5	no
gene10504	201.348	-0.695095	0.400046	-1.73754	0.0822919	0.204126	95.875	201.357	130.338	241.03	249.077	95.2614	245.471	248.782	304.939	HERC6	no
gene10505	2313.51	-0.185992	0.199036	-0.934465	0.350064	0.544287	1891.53	2185.23	2280.92	2491.73	2505.87	1802.3	2497.97	2529.88	2636.2	PPM1K	no
gene10506	907.259	-0.889083	0.26853	-3.31092	0.000929894	0.00762024	607.208	545.612	583.318	883.505	1275.58	862.828	1020.11	864.125	1523.04	ABCG2	no
gene10507	1539.61	-0.388706	0.409776	-0.948583	0.342833	0.536743	978.724	1358.46	1492.48	1692.91	1775.89	570.474	1876.24	1684.98	2426.29	PKD2	no
gene10508	4378.79	0.0787187	0.567791	0.13864	0.889735	0.93984	7402.35	3004.58	3211.45	5517.63	4080.12	953.709	3353.09	8335.98	3550.19	SPP1	no
gene10509	2.49561	-3.33161	1.42998	-2.32984	0.0198148	0.0743912	0	0.927912	0	2.44287	3.23477	5.47479	3.01809	2.40369	4.95836	MEPE	no
gene1051	674.249	-0.554596	0.168662	-3.28821	0.00100826	0.00813108	532.306	535.405	473.278	771.947	713.806	844.213	666.997	742.739	787.553	GPR89A	no
gene10510	1.11578	0.416003	1.82041	0.228521	0.819241	0.897365	1.9974	0.927912	1.06835	2.44287	0	0	0	3.60553	0	IBSP	no
gene10513	4677.18	0.915123	0.480051	1.90631	0.0566105	0.157421	7274.52	4982.89	8170.72	3284.85	3132.34	8419.14	1956.73	2611.6	2261.84	LAP3	no
gene10514	678.763	0.344877	0.364281	0.946735	0.343774	0.537578	660.139	720.988	991.426	613.161	404.346	1117.95	457.743	585.298	557.816	MED28	no
gene10515	118.821	-1.09133	0.369594	-2.95279	0.00314918	0.0191452	60.9206	84.44	57.6908	138.429	147.721	75.5522	114.687	213.928	176.022	FAM184B	no
gene10517	894.643	-0.328338	0.329577	-0.996241	0.319133	0.512625	813.939	753.465	725.408	802.076	967.196	1611.78	625.75	1005.94	746.233	NCAPG	no
gene1052	2552.02	1.21475	0.582454	2.08557	0.0370178	0.11608	5387.98	2478.45	4471.03	2541.4	1257.25	270.455	2680.06	2301.53	1580.06	PDZK1	no
gene10520	1162.38	-1.75724	0.615647	-2.8543	0.00431316	0.0241863	460.4	595.719	291.659	1223.06	1771.58	202.567	1135.81	3079.12	1701.54	LCORL	no
gene10527	1950.95	-0.722355	0.431872	-1.67261	0.0944034	0.22372	1366.22	1394.65	1322.61	1702.68	2787.29	719.388	3116.68	3086.33	2062.68	SLIT2	no
gene10529	294.419	-0.546812	0.388518	-1.40743	0.1593	0.321132	223.708	275.59	176.277	381.088	343.964	124.825	420.52	390.599	313.203	PACRGL	no
gene1053	1247.7	-0.813744	0.329001	-2.47338	0.0133843	0.0560564	789.97	893.579	803.397	1539.82	1521.42	672.305	1446.67	1657.34	1904.84	RNF115	no
gene10530	700.421	-1.92491	0.554771	-3.46974	0.000520962	0.00486651	273.643	329.409	130.338	784.976	673.91	247.461	1780.67	709.087	1374.29	KCNIP4	down
gene10539	2371.75	0.499458	0.286557	1.74296	0.0813404	0.202401	2398.87	3242.12	3198.63	2401.34	2992.16	1525.28	1801.8	2136.88	1648.66	ADGRA3	no
gene1054	319.547	0.412343	0.33827	1.21898	0.222853	0.40608	392.488	353.534	402.767	215.787	231.825	509.156	302.815	229.552	238.001	POLR3C	no
gene10541	15.9954	-0.232841	0.498539	-0.467047	0.640466	0.783723	11.9844	15.7745	14.9569	10.5858	19.4086	10.9496	12.0723	30.0461	18.1807	LOC101103396	no
gene10542	449.957	-1.25134	0.500217	-2.50159	0.0123635	0.052815	228.702	326.625	147.432	592.804	659.893	135.775	869.209	566.068	523.107	PPARGC1A	no
gene10545	3611.43	-0.387362	0.189127	-2.04816	0.0405439	0.123899	2608.6	3226.35	3153.76	4178.94	4227.84	3143.63	3718.28	4218.47	4027.02	DHX15	no
gene10547	191.425	-0.146713	0.323309	-0.453787	0.649982	0.789061	140.816	168.88	226.49	175.887	279.268	239.796	156.941	129.799	204.946	SOD3	no
gene10548	913.247	-0.989516	0.440174	-2.24801	0.0245754	0.0869702	543.292	592.008	518.149	1307.75	1407.12	286.879	1236.41	1221.07	1106.54	CCDC149	no
gene1055	164.236	0.986574	0.297688	3.31412	0.000919318	0.00755449	268.65	237.545	229.695	162.858	97.0431	162.054	134.808	93.7438	91.7297	NUDT17	no
gene10550	36.491	1.38164	0.438592	3.15016	0.00163179	0.0116785	37.9505	72.3771	75.8527	20.3573	33.426	17.5193	16.0965	16.8258	38.0141	LGI2	no
gene10551	623.668	-0.714077	0.275091	-2.59579	0.00943747	0.0432688	359.531	495.505	456.184	731.233	660.971	443.458	766.594	866.529	833.005	SEPSECS	no
gene10552	659.573	-0.0763197	0.333745	-0.228677	0.81912	0.897288	452.41	648.61	808.739	688.89	794.675	338.342	756.534	733.124	714.83	PI4K2B	no
gene10553	449.609	-0.949481	0.448992	-2.11469	0.034456	0.110326	243.682	340.544	247.857	511.374	664.206	152.199	488.93	781.198	616.49	ZCCHC4	no
gene10554	1216.1	-0.778614	0.318393	-2.44545	0.0144673	0.0592643	873.861	896.363	699.768	1508.88	1094.43	2328.98	1124.74	1057.62	1360.24	ANAPC4	no
gene10555	8.35038	1.10613	0.882633	1.25321	0.210129	0.389954	14.9805	9.27912	14.9569	14.6572	1.07826	0	10.0603	6.00922	4.13197	SLC34A2	no
gene10556	400.934	0.703595	0.367483	1.91463	0.0555398	0.155431	411.464	587.368	620.71	475.546	477.668	297.829	197.182	323.296	217.341	SEL1L3	no
gene10558	1717.47	-0.780162	0.407572	-1.91417	0.0555982	0.155531	1564.96	901.003	1019.2	1249.12	1844.9	2404.53	1444.66	3662.02	1366.85	SMIM20	no
gene1056	247.795	0.491535	0.389854	1.26082	0.207375	0.385851	242.684	353.534	324.778	297.216	183.304	106.211	346.074	173.065	203.293	PIAS3	no
gene10562	4764.1	-0.67669	0.375565	-1.80179	0.0715784	0.186158	3431.53	3255.12	3529.82	5658.51	6715.38	2036.62	6176.01	5016.49	7057.4	RBPJ	no
gene10564	2.29411	-1.13976	1.14825	-0.992603	0.320904	0.514454	0.998698	2.78374	0	4.88574	2.15651	1.09496	3.01809	2.40369	3.30557	CCKAR	no
gene10565	539.859	-0.848658	0.346172	-2.45155	0.0142242	0.0585657	333.565	402.714	319.436	699.476	714.884	379.951	384.303	917.006	707.393	TBC1D19	no
gene10566	1094.72	-0.287456	0.313165	-0.917908	0.358667	0.552774	876.857	965.028	1021.34	1293.91	1328.41	602.227	1109.65	1570.81	1084.23	STIM2	no
gene1057	1635.86	1.48575	0.339586	4.37517	1.21e-05	0.000237306	3263.75	2441.34	2884.54	1438.85	825.945	947.139	1511.06	725.913	684.254	ANKRD35	up
gene10574	4631.47	-0.368188	0.42554	-0.865226	0.386915	0.579719	3801.05	4291.59	3545.85	6213.04	6549.33	1692.81	4467.77	7280.77	3841.08	PCDH7	no
gene1058	117.538	-0.113299	0.480973	-0.235562	0.813772	0.89369	95.875	161.457	76.921	115.629	60.3824	249.651	94.5667	76.918	126.438	ITGA10	no
gene10582	3138.84	-0.891159	0.606581	-1.46915	0.141792	0.296403	1535	2498.87	1964.69	4245.71	5245.72	400.755	2880.26	5821.73	3656.79	ARAP2	no
gene10583	88.6054	-0.353839	0.569384	-0.621442	0.534309	0.705253	47.9375	101.142	74.7843	56.186	133.704	37.2286	67.4039	218.735	60.3267	LOC106991214	no
gene10584	8.61222	-1.96201	1.11015	-1.76734	0.0771721	0.195161	5.99219	2.78374	0	9.77149	5.39128	0	8.04823	24.0369	21.4862	DTHD1	no
gene10585	8.85993	-1.98004	0.698844	-2.83331	0.00460684	0.0254934	1.9974	3.71165	3.20504	10.5858	9.70431	19.7093	6.03617	13.2203	11.5695	NWD2	no
gene10586	25.1615	-1.96821	0.479071	-4.10839	3.98e-05	0.000626685	6.99089	12.0629	6.41008	21.9858	28.0347	25.1841	47.2834	39.6608	38.8405	C6H4orf19	down
gene10588	1312.43	-0.47324	0.318321	-1.48667	0.137101	0.289672	1018.67	1020.7	1088.65	1284.14	1983.99	800.415	1503.01	1219.87	1892.44	RELL1	no
gene1059	544.132	0.17493	0.188327	0.928862	0.35296	0.547221	622.189	544.684	600.411	617.232	439.929	539.815	511.063	538.426	483.44	PEX11B	no
gene10590	662.24	0.765522	0.389842	1.96367	0.0495682	0.143226	522.319	1204.43	1011.73	484.503	748.31	263.885	496.978	566.068	661.941	PGM2	no
gene10591	798.394	-0.748955	0.25636	-2.9215	0.00348345	0.0206768	401.477	754.392	491.44	894.905	1052.38	813.554	898.384	861.721	1017.29	TBC1D1	no
gene10596	4973.73	-0.314361	0.392036	-0.801867	0.42263	0.611687	3873.95	4566.25	4397.32	6006.21	5360.01	1893.18	6382.25	7431	4853.41	KLF3	no
gene10598	8.68343	-1.63011	0.827616	-1.96965	0.0488786	0.141828	1.9974	5.56747	3.20504	17.1001	5.39128	5.47479	12.0723	24.0369	3.30557	TLR10	no
gene10599	48.9707	-0.962172	0.569306	-1.69008	0.091013	0.21823	12.9831	57.5305	19.2303	39.9002	37.739	119.351	46.2773	43.2663	64.4587	TLR1	no
gene1060	50.4805	-0.650745	0.576987	-1.12783	0.259391	0.447514	42.944	38.9723	27.777	48.0431	83.0258	7.66471	66.3979	70.9087	68.5907	LOC101114745	no
gene10600	106.712	0.268397	0.312338	0.859316	0.390166	0.582723	79.8959	146.61	134.612	101.786	120.765	76.6471	76.4582	102.157	121.48	TLR6	no
gene10601	2194.64	-0.628063	0.247084	-2.54191	0.011025	0.0485932	1548.98	1443.83	1835.42	2402.97	3189.48	1767.26	2207.23	2856.78	2499.84	FAM114A1	no
gene10602	58.2231	-1.50097	0.475594	-3.15598	0.00159958	0.0115064	15.9792	31.549	30.9821	37.4574	65.7736	45.9883	92.5547	131.001	72.7226	TMEM156	no
gene10603	775.515	-0.537908	0.390728	-1.37668	0.168611	0.334322	481.373	656.034	650.624	862.334	991.996	325.203	762.57	1090.07	1159.43	KLHL5	no
gene10605	542.581	-0.650466	0.299941	-2.16865	0.0301094	0.100523	325.576	476.019	378.195	739.376	654.502	337.247	670.015	634.573	667.726	WDR19	no
gene10606	1589.69	-0.12756	0.705012	-0.180934	0.85642	0.920042	1831.61	1281.45	1379.24	1950.23	2174.84	63.5076	1873.23	1697	2056.07	RFC1	no
gene10608	78.9255	-1.27086	0.358873	-3.54124	0.000398246	0.00393329	42.944	36.1886	42.7339	50.486	95.9648	136.87	102.615	90.1382	112.39	KLB	down
gene10609	7136.63	-0.538247	0.450654	-1.19437	0.232334	0.417042	7705.96	5063.62	3680.46	5740.75	8730.64	11148.9	4844.03	13395.7	3919.58	RPL9	no
gene10610	444.23	-0.0525524	0.230654	-0.227841	0.81977	0.897685	488.363	402.714	410.245	567.561	393.564	365.716	438.629	409.828	521.454	LIAS	no
gene10611	1930.89	-0.370271	0.227547	-1.62723	0.103688	0.23838	1481.07	1828.91	1537.35	2255.58	2349.52	2298.32	1650.89	1626.09	2350.26	UGDH	no
gene10612	2826.28	-0.569355	0.213658	-2.66479	0.00770359	0.0373262	1997.4	1784.37	2629.2	2852.46	3583.05	3095.45	2810.84	3647.59	3036.17	SMIM14	no
gene10613	3934.16	-0.587338	0.284623	-2.06356	0.039059	0.120628	2960.14	2699.3	3181.54	4521.76	4664.54	2723.16	3679.05	6124.59	4853.41	UBE2K	no
gene10614	3854	-0.299971	0.246523	-1.21681	0.223677	0.407098	2826.32	3324.71	3867.42	4338.54	4463.98	2781.2	3992.93	5033.32	4057.59	PDS5A	no
gene10617	1664.16	-0.206316	0.653722	-0.315603	0.752304	0.856645	1117.54	1528.27	1882.43	1590.31	2157.59	157.674	1510.05	3642.79	1390.82	N4BP2	no
gene10618	143.147	-0.392649	0.604694	-0.649336	0.516121	0.691354	129.831	84.44	141.022	126.215	115.373	22.9941	173.037	329.305	166.105	RHOH	no
gene1062	539.106	-0.277577	0.230199	-1.20581	0.227889	0.412313	358.533	496.433	561.951	487.76	692.241	572.663	555.328	531.215	595.83	LIX1L	no
gene10620	0.92367	-0.696705	1.91371	-0.36406	0.715813	0.831627	1.9974	0	0	1.62858	0	0	1.00603	1.20184	2.47918	CHRNA9	no
gene10621	1637.4	-1.23336	0.701338	-1.75858	0.0786492	0.197798	893.835	830.481	860.02	2254.77	1726.29	87.5967	2489.92	3348.33	2245.31	RBM47	no
gene10622	190.901	-1.21805	0.531385	-2.29222	0.0218927	0.0799282	119.844	103.926	80.1261	111.558	304.068	59.1278	294.766	286.039	358.655	NSUN7	no
gene10623	5654.68	-1.11686	0.477169	-2.34059	0.0192532	0.0730552	2714.46	4285.1	2535.19	7158.43	9306.43	1643.53	6666.95	8130.47	8451.53	APBB2	no
gene10625	123.679	-0.821618	0.848762	-0.968019	0.333035	0.527238	96.8737	56.6026	91.8779	25.243	112.139	564.999	42.2532	79.3216	43.7989	UCHL1	no
gene10626	1453.12	-1.07263	0.460136	-2.33113	0.0197467	0.0742455	655.146	1030.91	825.833	1828.9	2278.36	447.838	2070.41	1670.56	2270.1	LIMCH1	no
gene10628	2407.99	0.0823642	0.340739	0.241722	0.808995	0.890013	2047.33	2172.24	3281.96	2394.83	2415.29	1228.54	2247.47	3437.27	2446.95	TMEM33	no
gene1063	3.45362	0.11946	0.887853	0.134549	0.892968	0.941311	2.99609	4.63956	3.20504	3.25716	2.15651	8.75967	2.01206	2.40369	1.65279	ANKRD34A	no
gene10630	1381.92	-0.376764	0.235183	-1.602	0.109155	0.247052	1269.35	1161.75	1026.68	1644.05	1705.8	1138.76	1171.02	1728.25	1591.63	SLC30A9	no
gene10631	2.69859	1.18668	1.09247	1.08623	0.277377	0.467392	3.99479	3.71165	5.34174	4.07145	4.31303	0	0	1.20184	1.65279	BEND4	no
gene10632	32.6477	1.83273	0.447049	4.09962	4.14e-05	0.000644625	58.9232	75.1609	53.4174	12.2144	21.5651	31.7538	18.1085	14.4221	8.26394	SHISA3	up
gene10633	2431.69	-1.36554	0.592087	-2.30632	0.021093	0.0778244	1337.26	1078.23	1141	3292.18	2355.99	531.055	2348.07	7196.64	2604.79	ATP8A1	no
gene10634	8.0595	-2.22591	0.83158	-2.67672	0.00743471	0.0364108	3.99479	1.85582	1.06835	9.77149	6.46954	12.0445	5.03014	24.0369	8.26394	GRXCR1	no
gene10636	86.0361	-1.07648	0.541517	-1.98789	0.0468237	0.137665	64.9154	56.6026	26.7087	147.387	174.678	44.8933	58.3497	145.423	55.3684	KCTD8	no
gene10638	122.964	0.733076	1.04909	0.69877	0.484696	0.667674	240.686	21.342	240.378	308.616	37.739	12.0445	8.04823	216.332	21.4862	YIPF7	no
gene10639	12.2183	1.59811	0.931407	1.7158	0.0861988	0.210761	17.9766	4.63956	43.8022	19.543	4.31303	12.0445	2.01206	4.80737	0.826394	GUF1	no
gene1064	572.597	0.182692	0.224997	0.811975	0.416806	0.60709	698.09	556.747	611.095	485.317	693.319	503.681	587.521	437.471	580.128	POLR3GL	no
gene10640	1442.77	-0.725899	0.238749	-3.04043	0.0023624	0.0155261	923.796	1157.11	932.667	1632.65	1733.84	1981.88	1374.24	1992.66	1256.12	GNPDA2	no
gene10644	16.1625	-0.844424	0.860008	-0.981879	0.32616	0.520016	16.9779	9.27912	5.34174	16.2858	16.1738	0	17.1025	44.4682	19.8334	GABRG1	no
gene10645	30.5569	-0.785726	0.532368	-1.47591	0.139969	0.29395	13.9818	32.4769	14.9569	16.2858	44.2085	52.558	19.1146	51.6793	29.7502	GABRA2	no
gene10647	19.4288	-1.71031	0.662635	-2.58108	0.00984918	0.0446452	2.99609	7.4233	12.8202	26.8716	32.3477	50.3681	9.05426	15.624	17.3543	LOC101121518	no
gene10648	6.23724	-1.77668	0.976168	-1.82006	0.0687502	0.18095	0	1.85582	5.34174	0.814291	7.5478	8.75967	9.05426	12.0184	10.7431	GABRA4	no
gene10649	14126.9	-0.183959	0.416876	-0.44128	0.65901	0.795669	13208.8	10589.3	15059.4	14515.5	8159.17	29939.5	13749.4	11191.6	10729.1	GABRB1	no
gene1065	14269.8	0.427469	0.244784	1.74631	0.0807572	0.201314	18385	14609	18643.7	15923.5	12789.2	11459.8	15576.3	9429.66	11611.7	TXNIP	no
gene10654	711.181	-0.484449	0.415578	-1.16572	0.243726	0.430184	407.469	572.522	705.109	627.004	897.109	361.336	590.539	1354.48	885.067	COMMD8	no
gene10655	1739.81	-0.454438	0.482336	-0.942162	0.34611	0.540135	933.783	1487.44	1764.91	2114.71	2024.97	512.441	1686.1	3236.56	1897.4	ATP10D	no
gene10658	292.729	-1.59116	0.405469	-3.92424	8.7e-05	0.0011696	113.852	140.115	120.723	271.973	254.469	342.722	303.821	770.381	316.509	CORIN	down
gene1066	0.733227	-2.60895	3.26599	-0.798825	0.424392	0.61331	0	0	0	0.814291	0	0	0	0	5.78475	HFE2	no
gene10662	399.667	-0.266439	0.297421	-0.895831	0.370343	0.563978	307.599	406.425	341.871	460.888	434.537	271.55	355.128	616.545	402.454	NFXL1	no
gene10663	3.454	-1.06371	1.02868	-1.03405	0.301112	0.49337	4.99349	0	1.06835	3.25716	2.15651	4.37984	7.0422	2.40369	5.78475	CNGA1	no
gene10664	471.402	0.428045	0.526447	0.813082	0.416171	0.606575	294.616	520.559	891.002	425.874	458.259	111.686	513.075	699.473	328.078	NIPAL1	no
gene10665	38.2531	-1.10219	0.391443	-2.81572	0.00486685	0.026486	15.9792	31.549	17.0936	35.0145	43.1303	38.3236	57.3437	63.6977	42.1461	TXK	no
gene10666	1270.89	-0.623135	0.235376	-2.6474	0.00811132	0.0387519	889.84	958.533	955.103	1716.52	1491.23	944.949	1473.83	1462.64	1545.36	TEC	no
gene10668	2523.04	0.0179264	0.316807	0.0565844	0.954876	0.977801	2137.21	2546.19	2948.64	2657.84	2883.26	1269.06	2350.08	3192.1	2722.97	SLAIN2	no
gene10669	9.81469	-1.27259	0.679292	-1.87341	0.0610124	0.166046	3.99479	3.71165	7.47843	11.4001	8.62605	27.374	7.0422	9.61474	9.09033	SLC10A4	no
gene10670	29.8003	-1.0234	0.674482	-1.51731	0.129188	0.277435	19.974	16.7024	16.0252	21.1716	23.7216	19.7093	20.1206	111.771	19.0071	ZAR1	no
gene10671	3540.33	-0.771982	0.464518	-1.6619	0.0965328	0.22702	1921.5	2970.25	2324.72	4348.31	4920.08	1110.29	3790.72	6613.74	3863.39	FRYL	no
gene10673	4879.93	0.268372	0.176454	1.52091	0.128282	0.276032	5293.1	5030.21	6184.66	4436.25	4831.67	3869.58	4455.7	5136.68	4681.52	OCIAD1	no
gene10674	1554.18	-0.310311	0.374346	-0.828942	0.407137	0.598753	1277.33	1210.93	1530.94	1269.48	1941.94	884.727	1458.74	2901.25	1512.3	OCIAD2	no
gene10675	555.815	0.279902	0.285892	0.979049	0.327556	0.521493	515.328	596.647	777.757	712.504	491.685	476.307	454.725	612.94	364.44	CWH43	no
gene10676	2105.57	-0.510739	0.424018	-1.20452	0.228389	0.412902	1582.94	1784.37	1555.51	3006.36	2177	689.824	2363.16	2879.62	2911.38	DCUN1D4	no
gene10678	79.6921	0.613177	0.374355	1.63796	0.101431	0.234716	75.9011	133.619	101.493	105.858	40.9737	56.9379	56.3376	84.129	61.9795	LRRC66	no
gene10679	232.939	0.429026	0.381896	1.12341	0.261263	0.449566	135.823	263.527	444.433	223.116	187.617	142.345	248.489	227.148	223.953	SGCB	no
gene10681	5.38669	-4.47731	1.47016	-3.04545	0.0023233	0.0153202	0.998698	0	0	8.9572	6.46954	0	12.0723	8.4129	11.5695	SPATA18	no
gene10684	1686.59	-0.296791	0.416676	-0.712282	0.47629	0.660159	1247.37	1405.79	1738.2	2158.68	1567.79	572.663	2344.05	2117.65	2027.14	USP46	no
gene10686	97.5204	0.418736	0.37148	1.12721	0.259654	0.44775	123.839	106.71	120.723	70.029	58.2259	153.294	101.609	82.9272	60.3267	RASL11B	no
gene10687	1241.94	-0.807536	0.286927	-2.81443	0.00488635	0.0265279	817.934	953.893	711.519	1612.3	1786.67	907.721	1269.61	1832.81	1285.04	SCFD2	no
gene10688	1309.18	-0.137973	0.208846	-0.660643	0.508841	0.685815	1101.56	1360.32	1218.98	1172.58	1565.63	1107	1262.57	1539.56	1454.45	FIP1L1	no
gene10689	1164.61	-1.05144	0.418158	-2.51446	0.0119215	0.0513341	635.172	632.836	769.21	1321.59	1586.12	429.224	1563.37	1868.87	1675.1	LNX1	no
gene10690	1107.66	-0.301596	0.373941	-0.806535	0.419934	0.60992	905.819	1031.84	939.077	1035.78	1381.25	543.1	1017.1	1950.59	1164.39	CHIC2	no
gene10691	0.378043	0.00484522	3.53382	0.0013711	0.998906	0.999356	0.998698	0	0	0	0	0	0	2.40369	0	GSX2	no
gene10693	1697.68	0.657672	0.277285	2.37183	0.0177003	0.0687943	1417.15	2426.49	2894.15	1302.05	1414.67	1263.58	1659.95	1249.92	1651.13	PDGFRA	no
gene10696	245.24	-0.539297	0.422568	-1.27624	0.201872	0.378548	140.816	204.141	220.08	258.944	359.059	87.5967	322.935	316.085	297.502	KIT	no
gene10698	850.169	0.0884154	0.346023	0.255519	0.798323	0.883143	523.318	1007.71	1124.97	874.548	1105.21	493.826	765.588	781.198	975.144	KDR	no
gene10699	335.005	-0.0213307	0.315903	-0.067523	0.946165	0.972789	393.487	283.013	318.368	192.987	436.694	328.488	444.665	301.663	315.682	SRD5A3	no
gene107	2225.54	-0.136004	0.302103	-0.450191	0.652573	0.791395	2052.32	1998.72	2212.55	2177.41	2454.11	3359.33	2609.64	1703.01	1462.72	USP40	no
gene10700	1127.44	-0.239492	0.18811	-1.27315	0.202966	0.380037	983.718	1030.91	1004.25	1256.45	1252.93	949.329	1078.46	1362.89	1228.02	TMEM165	no
gene10701	1289.36	-0.646283	0.372656	-1.73426	0.0828717	0.205135	909.814	930.696	968.991	1237.72	1718.74	590.183	1477.86	2071.98	1698.24	CLOCK	no
gene10702	2.10435	-2.10569	1.46469	-1.43764	0.150537	0.309239	0.998698	0.927912	0	0.814291	3.23477	0	4.02412	4.80737	4.13197	PDCL2	no
gene10703	35.0445	-1.83587	0.846012	-2.17002	0.030005	0.100231	32.957	4.63956	1.06835	15.4715	109.982	37.2286	39.2351	51.6793	23.139	NMU	no
gene10706	1333.88	-0.487496	0.256154	-1.90314	0.0570229	0.158102	967.739	1058.75	1129.24	1315.89	1495.54	982.178	1505.02	1961.41	1589.15	EXOC1	no
gene10708	261.02	-0.543035	0.661463	-0.820961	0.411669	0.602836	148.806	300.643	150.637	241.03	549.911	26.279	215.29	352.14	364.44	CEP135	no
gene10709	415.484	-1.38742	0.529545	-2.62003	0.00879216	0.0411088	247.677	155.889	196.576	532.546	721.354	95.2614	507.039	485.545	797.47	KIAA1211	no
gene10710	637.159	-0.619732	0.243642	-2.54362	0.0109711	0.0483917	419.453	463.956	524.559	708.433	670.676	508.061	712.269	912.199	814.824	AASDH	no
gene10711	246.499	-0.755434	0.251664	-3.00176	0.00268426	0.0170057	193.747	162.385	150.637	217.416	263.095	361.336	255.531	278.828	335.516	LOC105615499	no
gene10712	13.7077	-2.8835	0.733477	-3.93128	8.45e-05	0.0011419	2.99609	4.63956	0	11.4001	14.0173	13.1395	29.1748	24.0369	23.9654	PPAT	down
gene10713	42.6423	-0.865336	0.479946	-1.80299	0.0713903	0.185832	23.9688	35.2607	23.5036	59.4432	33.426	18.6143	47.2834	61.294	80.9866	PAICS	no
gene10714	3309.64	-0.15784	0.216032	-0.730633	0.465004	0.650347	3776.08	2567.53	2874.92	3652.09	4140.51	3310.06	2944.65	3216.13	3304.75	SRP72	no
gene10715	19.9381	-2.258	0.672741	-3.35642	0.000789593	0.00666994	9.98698	2.78374	4.27339	12.2144	38.8172	18.6143	40.2412	12.0184	40.4933	ARL9	down
gene10716	3.28898	-4.75666	1.6368	-2.90607	0.00365996	0.0213936	0	0	0	2.44287	6.46954	8.75967	2.01206	0	9.91672	THEGL	no
gene10719	7989.2	0.00180927	0.364599	0.00496235	0.996041	0.999356	8967.31	7158.84	7860.9	6638.1	7749.43	6680.34	5610.62	15215.3	6021.93	HOPX	no
gene10721	1044.85	-0.0641743	0.275908	-0.232593	0.816078	0.895232	914.808	986.37	1141	980.406	979.057	712.818	1013.07	1529.95	1146.21	LOC101110593	no
gene10723	9.00883	-0.733203	0.658563	-1.11334	0.265564	0.454237	6.99089	8.35121	3.20504	6.51432	5.39128	6.56975	14.0844	19.2295	10.7431	LOC101118448	no
gene10726	889.629	0.0355497	0.228206	0.155779	0.876207	0.932397	873.861	901.93	936.941	850.934	847.51	642.741	874.239	1153.77	924.734	LOC101111099	no
gene10727	358.029	0.182757	0.21499	0.85007	0.395286	0.587494	397.482	357.246	411.314	289.887	310.538	416.084	316.899	403.819	318.988	NOA1	no
gene10728	4720.23	-0.529094	0.236101	-2.24097	0.0250283	0.0882551	3072	3561.33	4299.03	5608.02	5911	3742.57	4782.66	5564.53	5940.94	POLR2B	no
gene10731	2248.64	0.375227	0.290144	1.29324	0.195927	0.370767	2794.36	2341.12	2825.78	1889.15	2443.33	2987.05	1371.22	1748.68	1837.07	IGFBP7	no
gene10736	8601	-1.90068	0.707455	-2.68664	0.00721749	0.0355623	3278.73	3277.39	2585.4	11278.7	10299.5	637.266	11459.7	25711	8881.25	ADGRL3	no
gene10739	7.91189	-4.10111	1.20051	-3.41613	0.000635179	0.00565106	0	0.927912	1.06835	7.32861	11.8608	10.9496	8.04823	25.2387	5.78475	TECRL	down
gene10742	55.624	-1.90211	0.488942	-3.89026	0.000100138	0.00130466	21.9714	24.1257	12.8202	58.6289	38.8172	38.3236	88.5305	116.579	100.82	EPHA5	down
gene10747	1327.25	-0.719772	0.434674	-1.65589	0.0977438	0.228868	909.814	978.947	893.138	1446.18	2059.47	451.123	1315.89	2116.45	1774.27	CENPC	no
gene10748	152.43	-1.51501	0.54963	-2.75641	0.0058439	0.0303079	64.9154	90.0075	49.144	118.886	318.086	42.7034	211.266	288.442	188.418	STAP1	no
gene10749	1952.65	-0.368967	0.308078	-1.19764	0.231056	0.415557	1294.31	1717.57	1893.11	1915.21	2419.61	1274.53	1731.38	2789.48	2538.68	UBA6	no
gene10751	64.528	-1.41021	0.51599	-2.73301	0.00627585	0.0320248	23.9688	30.6211	37.3922	58.6289	104.591	19.7093	85.5125	115.377	104.952	GNRHR	no
gene10752	64.2676	-1.63754	0.409456	-3.99931	6.35e-05	0.000910506	27.9635	13.9187	38.4605	79.8005	93.8083	60.2227	116.699	91.3401	56.1948	TMPRSS11D	down
gene10753	11.6939	-2.62312	0.686878	-3.81891	0.000134045	0.00164163	1.9974	3.71165	2.13669	15.4715	15.0956	7.66471	22.1326	18.0276	19.0071	TMPRSS11A	down
gene10754	2.58081	-2.42314	1.42219	-1.70381	0.0884171	0.21432	0.998698	0.927912	0	3.25716	4.31303	0	2.01206	8.4129	3.30557	LOC101121267	no
gene10755	899.851	-0.107669	0.472726	-0.227761	0.819832	0.897685	695.094	804.5	1067.28	1097.66	807.614	284.689	938.625	1695.8	707.393	TMPRSS11F	no
gene10756	25.1604	-2.83096	0.817924	-3.46116	0.00053786	0.00497465	2.99609	6.49538	5.34174	55.3718	84.104	18.6143	14.0844	33.6516	5.78475	LOC101115964	down
gene10757	2.27394	-2.15171	1.39753	-1.53965	0.123645	0.269212	0	0	2.13669	1.62858	5.39128	2.18992	1.00603	4.80737	3.30557	TMPRSS11B	no
gene10758	2004.86	-0.858599	0.50897	-1.68693	0.0916162	0.219141	1366.22	934.407	1599.32	1867.98	1845.98	798.225	2198.17	5340.99	2092.43	LOC101121777	no
gene10760	14.6469	-0.45969	0.789592	-0.582187	0.56044	0.724855	18.9753	14.8466	1.06835	4.88574	14.0173	28.4689	7.0422	27.6424	14.8751	LOC105615508	no
gene10762	3446.09	-0.0303081	0.253491	-0.119563	0.904829	0.948074	3698.18	3342.34	3153.76	4273.4	3810.56	2168.02	3430.56	3630.77	3507.21	YTHDC1	no
gene10764	0.690332	-2.48499	2.6387	-0.941748	0.346322	0.540214	0	0	0	0	2.15651	0	0	2.40369	1.65279	LOC101116729	no
gene10765	0.66723	-2.44119	2.03208	-1.20133	0.229625	0.41402	0	0	0	0.814291	2.15651	0	1.00603	1.20184	0.826394	UGT2B7	no
gene10768	0.952712	-1.78717	2.27633	-0.785109	0.43239	0.620776	0	0	1.06835	0	1.07826	0	4.02412	2.40369	0	LOC101117163	no
gene10770	0.860772	0.489518	2.23042	0.219474	0.826281	0.901075	0.998698	0	2.13669	0	0	0	1.00603	3.60553	0	LOC101118189	no
gene10772	1.47034	-1.46133	1.91687	-0.762348	0.445852	0.633751	0	0.927912	1.06835	0	2.15651	5.47479	0	3.60553	0	LOC101118447	no
gene10774	8.54453	-3.60987	1.05545	-3.42024	0.000625667	0.00558602	1.9974	0	1.06835	12.2144	14.0173	21.8992	3.01809	14.4221	8.26394	LOC101122788	down
gene10777	1.92006	-3.96355	1.73661	-2.28235	0.0224688	0.0813623	0	0	0	0.814291	4.31303	0	2.01206	6.00922	4.13197	LOC101119393	no
gene10780	1.24037	-3.33148	2.99884	-1.11092	0.266602	0.455267	0	0	0	0	0	8.75967	0	2.40369	0	UGT2A1	no
gene10781	38.682	-1.441	0.630513	-2.28544	0.0222873	0.0809528	7.98959	12.0629	34.1871	33.3859	75.478	17.5193	28.1688	88.9364	50.41	SULT1B1	no
gene10783	3.12026	-3.66632	1.64508	-2.22865	0.0258373	0.090372	0	0.927912	0	3.25716	1.07826	10.9496	0	3.60553	8.26394	SULT1E1	no
gene10786	0.716519	-2.53449	2.67015	-0.949195	0.342522	0.536423	0	0	0	0	3.23477	0	2.01206	1.20184	0	CSN1S2	no
gene10787	0.470679	-1.92438	2.89747	-0.664161	0.506587	0.684313	0	0	0	0	0	0	1.00603	2.40369	0.826394	PRR27	no
gene10789	2.62759	-4.42444	1.84996	-2.39164	0.0167735	0.0659026	0	0	0	4.88574	5.39128	0	0	8.4129	4.95836	CSN3	no
gene10793	9.79989	-3.84716	1.04635	-3.67675	0.000236227	0.00258626	1.9974	0.927912	0	13.8429	15.0956	3.28488	26.1568	12.0184	14.8751	LOC105615578	down
gene10794	1.73466	-1.83071	1.49162	-1.22733	0.219697	0.402204	0.998698	0.927912	0	4.88574	1.07826	0	2.01206	2.40369	3.30557	LOC105615513	no
gene10795	1.79351	-3.85394	1.81064	-2.1285	0.0332959	0.107798	0	0	0	0	3.23477	7.66471	2.01206	2.40369	0.826394	MUC7	no
gene10797	26.9215	-4.03488	0.940703	-4.28921	1.79e-05	0.000328543	0	0.927912	6.41008	83.8719	51.7563	8.75967	45.2713	31.2479	14.0487	AMTN	down
gene10799	565.454	0.737696	0.704618	1.04694	0.295125	0.486569	831.916	834.193	647.419	254.873	466.885	1479.29	256.537	229.552	88.4241	AMBN	no
gene108	291.254	0.647712	0.323386	2.00291	0.0451874	0.13403	331.568	480.658	339.734	294.773	218.886	135.775	254.525	233.158	332.21	DGKD	no
gene10800	51.948	-2.58185	0.893919	-2.88824	0.00387407	0.0223363	10.9857	18.5582	6.41008	76.5433	80.8692	0	91.5486	105.762	76.8546	ENAM	no
gene10802	821.975	0.0374066	0.420133	0.0890351	0.929054	0.963001	972.732	695.006	840.789	688.89	796.832	1715.8	556.334	576.885	554.51	UTP3	no
gene10803	1526.2	-0.66621	0.258993	-2.57231	0.0101022	0.0455431	1189.45	1256.39	845.063	1780.04	1794.22	1234.02	1569.41	1837.62	2229.61	RUFY3	no
gene10804	1167.34	0.763617	0.211366	3.61276	0.000302951	0.00315346	1437.13	1363.1	2023.45	907.934	952.101	1099.34	844.058	956.667	922.255	GRSF1	no
gene10805	3803.01	-0.31116	0.269663	-1.15388	0.248548	0.435924	2744.42	3130.77	3956.09	3677.34	4168.54	2944.34	3659.93	5735.19	4210.47	MOB1B	no
gene10806	224.653	0.313707	0.313594	1.00036	0.317136	0.510303	183.76	256.104	335.461	231.259	203.79	120.445	226.357	228.35	236.349	DCK	no
gene10807	1127.82	-1.67091	0.461722	-3.61885	0.000295912	0.00310035	310.595	544.684	522.422	1249.94	1926.84	587.993	1132.79	1138.15	2737.02	SLC4A4	down
gene10809	2.37128	-1.60051	1.28171	-1.24873	0.211763	0.391962	2.99609	0	0	1.62858	4.31303	3.28488	1.00603	4.80737	3.30557	GC	no
gene10811	2.34963	-4.2884	1.75391	-2.44505	0.0144831	0.0593014	0	0	0	8.14291	2.15651	0	1.00603	2.40369	7.43754	NPFFR2	no
gene10812	136.82	-1.27868	0.425801	-3.003	0.00267333	0.0169728	70.9076	81.6563	57.6908	139.244	162.817	77.7421	123.742	281.231	236.349	ADAMTS3	no
gene10816	311.091	-0.692233	0.383012	-1.80734	0.0707089	0.1846	185.758	244.041	231.831	311.059	378.468	140.155	376.255	484.343	447.905	LOC101103154	no
gene10817	4488.36	-0.145011	0.479543	-0.302394	0.762351	0.863265	4458.19	4103.23	4016.99	4969.62	5755.73	1025.98	4038.2	6721.91	5305.45	ANKRD17	no
gene10818	71.3417	0.316745	0.943633	0.335665	0.737123	0.846362	113.852	40.8281	91.8779	57.8146	8.62605	1.09496	51.3075	110.57	166.105	ALB	no
gene10819	0.419465	-0.42013	2.97793	-0.141081	0.887806	0.939761	0	0	1.06835	1.62858	1.07826	0	0	0	0	AFP	no
gene10821	1.21567	0.163617	2.03891	0.0802475	0.93604	0.967101	3.99479	0	0	1.62858	0	0	2.01206	0	3.30557	AFM	no
gene10822	11.0633	-0.203514	0.859152	-0.236878	0.812752	0.893066	4.99349	2.78374	22.4353	4.88574	3.23477	4.37984	15.0904	25.2387	16.5279	LOC101102731	no
gene10823	371.617	-0.188318	0.578476	-0.325542	0.744771	0.851815	268.65	386.011	365.375	435.645	198.399	65.6975	582.491	638.179	404.106	RASSF6	no
gene10826	45.9326	-0.528021	0.520771	-1.01392	0.31062	0.503184	21.9714	51.9631	32.0504	26.8716	33.426	60.2227	38.2291	108.166	40.4933	LOC101103238	no
gene10828	0.214882	0.485736	3.53382	0.137453	0.890672	0.93984	0	0.927912	0	0	0	0	1.00603	0	0	LOC101104151	no
gene10830	41.1506	-0.321681	0.493637	-0.651654	0.514625	0.689974	41.9453	32.4769	30.9821	26.0573	72.2432	45.9883	39.2351	64.8995	16.5279	PF4	no
gene10831	2.89729	-0.755182	1.24679	-0.6057	0.544714	0.713245	0	3.71165	2.13669	1.62858	4.31303	0	3.01809	9.61474	1.65279	CXCL1	no
gene10834	550.212	-3.49699	0.478947	-7.30141	2.85e-13	7.22e-11	76.8998	74.233	58.7591	285.002	808.692	508.061	649.895	1498.7	991.672	LOC101104661	down
gene10835	398.199	-0.995966	0.370322	-2.68946	0.0071568	0.0353886	225.706	334.048	158.115	382.717	628.624	283.594	428.568	686.252	456.169	MTHFD2L	no
gene10836	115.358	0.269616	0.329219	0.818958	0.41281	0.603597	95.875	139.187	154.91	94.4577	136.939	114.971	68.41	144.221	89.2505	EPGN	no
gene10837	830.786	-0.739014	0.346992	-2.12977	0.0331907	0.107614	480.374	539.117	704.041	994.249	796.832	597.848	833.998	1638.11	892.505	EREG	no
gene10838	1164.79	-0.567674	0.369968	-1.53439	0.124934	0.271113	1052.63	794.293	796.987	1061.83	1282.05	1172.7	1224.34	2362.82	735.49	AREG	no
gene10840	291.405	-0.419038	0.622858	-0.672767	0.501096	0.680003	228.702	274.662	210.464	485.317	184.382	36.1336	380.279	538.426	284.279	BTC	no
gene10841	1317.02	-0.27958	0.361085	-0.774279	0.438766	0.626581	1240.38	706.141	1511.71	1136.75	1148.34	866.112	1618.7	2035.92	1589.15	PARM1	no
gene10843	998.265	-0.276904	0.253536	-1.09217	0.274758	0.464417	839.905	903.786	880.318	977.963	1067.47	1052.26	769.612	1517.93	975.144	RCHY1	no
gene10844	80.9793	-0.40503	0.442063	-0.916225	0.359549	0.553521	49.9349	59.3864	90.8095	86.3148	51.7563	44.8933	87.5245	106.964	151.23	THAP6	no
gene10845	0.407205	-1.75183	3.51517	-0.498364	0.618228	0.765889	0	0	0	0	0	0	2.01206	0	1.65279	C6H4orf26	no
gene10847	304.78	-0.584975	0.450596	-1.29823	0.19421	0.368933	210.725	214.348	260.677	296.402	487.372	98.5463	304.827	475.93	394.19	CDKL2	no
gene10848	1655.77	0.184516	0.292787	0.630208	0.528559	0.700772	1417.15	1794.58	2187.98	1710.01	1707.96	894.581	1615.68	1848.43	1725.51	G3BP2	no
gene10849	2775.72	-0.00919667	0.171574	-0.0536018	0.957252	0.979198	2361.92	2877.45	3052.27	2706.7	3011.57	2508.55	2733.38	3005.81	2723.79	USO1	no
gene10850	2.72475	-3.45597	1.47244	-2.3471	0.0189201	0.0721924	0	0	1.06835	2.44287	2.15651	7.66471	5.03014	1.20184	4.95836	LOC105607844	no
gene10851	220.581	-0.524073	0.330025	-1.58798	0.112291	0.252414	204.733	149.394	158.115	182.401	146.643	227.751	328.971	274.02	313.203	PPEF2	no
gene10852	287.567	-0.149056	0.225186	-0.661924	0.50802	0.685355	241.685	307.139	255.335	313.502	249.077	257.315	365.189	324.498	274.363	NAAA	no
gene10853	1419.66	-0.46567	0.236465	-1.9693	0.0489187	0.14183	1131.53	1113.49	1151.68	1794.7	1962.43	1529.66	1139.83	1299.19	1654.44	SDAD1	no
gene10854	99.5564	-0.520974	0.579335	-0.899261	0.368514	0.561915	63.9167	56.6026	111.108	116.444	131.547	47.0832	26.1568	191.093	152.056	CXCL9	no
gene10855	78.0729	-1.54355	0.374156	-4.12542	3.7e-05	0.000589879	27.9635	32.4769	42.7339	117.258	117.53	84.3118	57.3437	81.7253	141.313	ART3	down
gene10858	777.314	-0.4135	0.277214	-1.49162	0.135798	0.287837	610.205	706.141	592.933	765.433	1006.01	503.681	837.016	1008.35	966.054	NUP54	no
gene10859	1554.94	0.0366935	0.284515	0.128968	0.897383	0.94378	1128.53	1627.56	1988.19	1528.42	2231.99	1316.14	1321.92	1451.83	1399.91	SCARB2	no
gene10861	158.035	-0.397123	0.382997	-1.03688	0.299791	0.491931	142.814	138.259	110.04	221.487	187.617	202.567	94.5667	230.754	94.2089	FAM47E	no
gene10864	667.748	0.871643	0.331807	2.62696	0.00861527	0.04042	1013.68	779.446	1077.96	550.46	485.215	847.498	520.117	412.232	323.12	STBD1	no
gene10865	215.482	-0.23317	0.408314	-0.571056	0.567962	0.729633	182.762	204.141	192.303	416.102	244.764	119.351	245.471	139.414	195.029	CCDC158	no
gene10867	1597.64	-0.457586	0.444493	-1.02945	0.303266	0.495483	1257.36	1323.2	1257.44	2291.41	1885.87	460.978	1701.19	2370.03	1831.29	SHROOM3	no
gene10870	71.6756	1.73279	0.544211	3.18404	0.00145234	0.0106661	129.831	111.349	161.32	39.0859	39.8955	6.56975	52.3135	73.3124	31.403	SOWAHB	no
gene10871	3117.11	0.612677	0.193286	3.16979	0.00152547	0.0110885	3687.19	4049.41	4419.75	3091.86	2754.95	2146.12	2630.77	2409.7	2864.28	2021-09-11	no
gene10873	5953.05	1.00883	0.286447	3.52187	0.000428517	0.00414466	9928.06	6823.86	10119.4	4782.33	4868.33	2601.62	5156.9	4327.84	4969.1	CCNI	up
gene10874	843.034	0.117557	0.379487	0.309778	0.75673	0.859537	801.955	656.962	1209.37	821.619	584.415	480.687	870.215	1386.93	775.157	CCNG2	no
gene10877	103.269	-0.689567	0.746867	-0.923279	0.355862	0.550134	51.9323	77.0167	90.8095	31.7573	67.9302	26.279	206.236	322.094	55.3684	CXCL13	no
gene10878	3045.04	0.0506324	0.399775	0.126652	0.899216	0.944929	2606.6	3162.32	3581.1	3136.65	3846.14	1089.48	2689.12	4309.81	2984.11	CNOT6L	no
gene10879	1480.21	-0.957831	0.324424	-2.9524	0.00315314	0.0191496	1168.48	764.599	793.782	1398.95	1833.04	2224.96	1191.14	2537.09	1409.83	MRPL1	no
gene10880	825.46	-1.00458	0.44658	-2.24951	0.0244804	0.0868229	508.337	711.708	261.745	1229.58	1069.63	374.476	908.444	1418.17	947.047	FRAS1	no
gene10882	1016.37	-0.861963	0.285776	-3.01622	0.0025595	0.0164739	670.126	657.89	645.282	1081.38	1292.83	1857.05	873.233	1045.6	1023.9	ANXA3	no
gene10885	695.899	0.271005	0.377142	0.718576	0.472402	0.656462	609.206	863.886	883.523	754.847	933.77	385.425	378.267	890.566	563.6	BMP2K	no
gene10886	2109.95	0.0551196	0.274002	0.201165	0.84057	0.91034	1715.76	2082.23	2694.37	2166.01	2187.78	1347.89	1911.46	2510.65	2373.4	PAQR3	no
gene10889	1171.9	-0.579931	0.293351	-1.97692	0.048051	0.140159	579.245	928.84	1135.65	952.72	1618.46	1341.32	1175.04	1265.54	1550.31	ANTXR2	no
gene10891	172.966	-0.506896	0.266668	-1.90085	0.0573217	0.158653	127.833	138.259	138.885	144.944	262.016	174.098	157.947	199.506	213.21	PRDM8	no
gene10892	270.773	-0.257769	0.693286	-0.371808	0.710036	0.828554	318.585	294.148	105.766	424.245	700.867	53.653	168.007	255.993	115.695	FGF5	no
gene10893	294.857	-2.22995	0.661882	-3.36911	0.000754125	0.006435	123.839	97.4308	34.1871	451.117	918.675	82.1219	243.459	498.765	204.119	C6H4orf22	down
gene10896	199.622	1.10457	0.450085	2.45414	0.0141223	0.0582728	272.645	303.427	354.691	157.158	146.643	40.5135	134.808	237.965	148.751	BMP3	no
gene10897	42.8263	-0.207682	0.387807	-0.535529	0.592284	0.746773	21.9714	47.3235	47.0073	42.3431	46.365	28.4689	43.2592	64.8995	43.7989	PRKG2	no
gene10898	2862.63	-0.791927	0.300748	-2.63319	0.00845869	0.03996	1942.47	1880.88	1949.73	4046.21	3284.37	1771.64	3385.29	4333.85	3169.22	RASGEF1B	no
gene109	4.26986	-1.17159	1.20287	-0.974	0.330057	0.524112	3.99479	0.927912	2.13669	4.88574	9.70431	0	6.03617	0	10.7431	SAG	no
gene10904	183.461	-1.48591	0.373862	-3.97449	7.05e-05	0.000988939	97.8724	96.5028	55.5541	228.001	228.59	107.306	290.742	278.828	267.751	LOC105609538	down
gene10905	5531.41	0.308659	0.186287	1.6569	0.09754	0.228481	6711.25	6526	5801.13	4928.9	5686.73	4841.91	4178.04	5881.82	5226.94	HNRNPD	no
gene10908	4564.57	-0.310392	0.210875	-1.47192	0.141042	0.295461	4226.49	4263.76	3314.01	4525.01	4369.1	6095.64	4185.08	4833.81	5268.26	HNRNPDL	no
gene10909	1861.69	0.0978521	0.182818	0.535243	0.592482	0.746773	2052.32	1971.81	1816.19	2006.41	1921.45	1458.49	1833.99	1983.04	1711.46	ENOPH1	no
gene10910	1338.27	-1.14749	0.446921	-2.56755	0.0102419	0.046033	646.158	782.23	789.509	1621.25	2122.01	424.844	1835	2112.84	1710.63	TMEM150C	no
gene10911	200.407	0.496052	0.41175	1.20474	0.228303	0.41281	175.771	277.446	292.727	167.744	164.973	63.5076	207.242	245.176	209.078	SCD5	no
gene10912	2094.78	0.275197	0.239697	1.1481	0.250927	0.438487	1828.62	2666.82	2612.11	1920.91	2177	1577.84	1727.35	1879.68	2462.65	SEC31A	no
gene10914	453.815	-0.499473	0.234489	-2.13005	0.0331672	0.107595	356.535	287.653	423.066	515.446	514.328	409.515	522.129	620.151	435.509	THAP9	no
gene10915	1186.34	-0.742986	0.36859	-2.01575	0.0438257	0.131108	706.08	961.317	788.44	1176.65	1270.19	612.082	1641.84	2052.75	1467.67	LIN54	no
gene10916	2213.06	-0.511493	0.297098	-1.72163	0.0851365	0.208875	1848.59	1620.13	1702.95	2089.47	2570.56	1622.73	2151.9	3814.65	2496.53	COPS4	no
gene10917	68.939	-2.19143	0.776459	-2.82234	0.00476748	0.026138	11.9844	28.7653	20.2986	26.8716	72.2432	73.3622	51.3075	312.479	23.139	PLAC8	no
gene10921	612.833	0.218588	0.263231	0.830405	0.40631	0.597982	712.072	685.727	630.325	451.117	618.919	857.353	495.972	525.205	538.809	COQ2	no
gene10922	55.5288	-1.56753	0.535003	-2.92995	0.00339015	0.0202361	13.9818	48.2514	9.61513	92.0148	52.8346	37.2286	88.5305	82.9272	74.3754	HPSE	no
gene10923	249.722	-0.548746	0.290376	-1.88978	0.0587879	0.161553	156.796	227.338	188.029	293.959	263.095	194.903	297.785	394.205	231.39	HELQ	no
gene10924	997.905	-0.795671	0.315296	-2.52357	0.011617	0.0503896	798.959	658.817	550.199	807.776	1303.61	1517.61	742.449	1453.03	1148.69	MRPS18C	no
gene10925	653.342	-0.340207	0.251399	-1.35325	0.175974	0.344603	513.331	723.771	427.339	755.662	778.501	663.545	532.189	753.556	732.185	FAM175A	no
gene10926	101.852	-0.456241	0.586244	-0.778245	0.436425	0.624549	58.9232	120.629	65.1692	134.358	158.504	15.3294	113.681	155.038	95.0353	GPAT3	no
gene10928	9.68369	1.41244	0.834176	1.69322	0.0904143	0.217587	17.9766	13.9187	18.1619	12.2144	6.46954	0	13.0784	1.20184	4.13197	NKX6-1	no
gene10929	4106.46	0.0517163	0.300019	0.172377	0.863141	0.924467	4795.75	3022.21	4797.95	4385.77	3350.14	2516.22	4550.27	5012.89	4526.98	CDS1	no
gene10930	3118.69	-0.400809	0.378045	-1.06022	0.289047	0.479967	1955.45	2898.8	2855.69	3582.06	3627.26	1421.26	3014.06	5034.52	3679.1	WDFY3	no
gene10932	6679.78	-1.70762	0.585118	-2.91843	0.00351801	0.0207851	4134.61	1704.57	2142.04	14259	6550.41	17833.6	3179.05	6956.27	3358.46	LOC101110941	no
gene10933	5769.69	-1.49709	0.541803	-2.76315	0.00572457	0.0298751	2837.3	3599.37	1377.1	7661.66	10425.7	1422.35	6711.22	10040.2	7852.39	ARHGAP24	no
gene10935	104.472	-1.20472	0.594607	-2.02608	0.0427565	0.128694	75.9011	59.3864	32.0504	56.186	125.078	67.8874	229.375	243.974	50.41	MAPK10	no
gene10937	4570.91	-0.327611	0.453453	-0.722481	0.469999	0.65441	3120.93	4421.5	4178.31	6202.45	6242.03	1290.96	5362.13	6120.99	4198.91	PTPN13	no
gene10940	177.692	-0.456497	0.484637	-0.941936	0.346226	0.540175	104.863	151.25	170.936	197.873	198.399	56.9379	317.905	268.011	133.049	SLC10A6	no
gene10941	28.6242	0.170934	0.634134	0.269554	0.787503	0.876001	33.9557	35.2607	23.5036	20.3573	34.5042	2.18992	45.2713	33.6516	28.9238	C6H4orf36	no
gene10944	5673.31	-0.935177	0.547596	-1.70779	0.0876759	0.213122	3690.19	3671.75	3222.14	8576.92	6402.69	930.715	7692.1	7605.26	9268	AFF1	no
gene10945	600.658	-0.937515	0.491915	-1.90585	0.0566699	0.157537	312.593	424.984	381.4	710.061	875.544	182.858	639.834	1294.38	584.26	KLHL8	no
gene10946	86.3021	2.91992	0.902253	3.23625	0.00121109	0.00931928	242.684	83.5121	288.454	57.0003	4.31303	6.56975	76.4582	14.4221	3.30557	HSD17B13	up
gene10947	493.248	-1.01076	0.261783	-3.86105	0.000112901	0.0014298	259.662	319.202	303.411	417.731	694.397	485.067	749.492	644.188	566.08	HSD17B11	down
gene10948	19.153	0.0272006	0.656911	0.0414069	0.966972	0.984603	5.99219	22.2699	29.9137	22.8001	16.1738	5.47479	32.1929	27.6424	9.91672	NUDT9	no
gene10949	1365.13	-0.420183	0.222254	-1.89055	0.0586839	0.161378	1031.66	1032.77	1277.74	1364.75	1541.91	1976.4	1396.37	1254.72	1409.83	LOC105607326	no
gene10950	2893.99	-0.726266	0.291286	-2.4933	0.0126561	0.0537542	1907.51	1932.84	2205.07	4366.23	4110.31	2262.18	3652.89	2296.72	3312.19	SPARCL1	no
gene10951	0.364986	-1.57259	3.52404	-0.446247	0.655419	0.793231	0	0	0	0	0	3.28488	0	0	0	DSPP	no
gene10952	1.50301	2.02122	1.65798	1.21909	0.22281	0.40608	0.998698	4.63956	3.20504	0	1.07826	0	0	3.60553	0	DMP1	no
gene10955	0.211628	-0.956939	3.53382	-0.270795	0.786549	0.875488	0	0	0	0	1.07826	0	0	0	0.826394	LOC101112483	no
gene10958	75.6936	-0.100361	0.419117	-0.239458	0.81075	0.891363	27.9635	101.142	87.6045	69.2147	101.356	65.6975	78.4703	58.8903	90.9033	PPP2R2C	no
gene10960	390.632	0.937502	0.428139	2.18972	0.0285448	0.0969696	552.28	431.479	736.091	264.644	218.886	612.082	226.357	173.065	300.807	WFS1	no
gene10961	19.1669	-3.14967	1.18388	-2.66047	0.00780328	0.0376756	4.99349	0	4.27339	19.543	2.15651	19.7093	109.657	7.21106	4.95836	LOC101112981	no
gene10962	23.3877	-0.436438	0.451662	-0.966293	0.333898	0.528086	18.9753	21.342	16.0252	17.1001	20.4869	32.8488	29.1748	39.6608	14.8751	JAKMIP1	no
gene10963	4.74094	-0.500592	0.85439	-0.585905	0.557939	0.723194	6.99089	1.85582	2.13669	1.62858	6.46954	7.66471	5.03014	8.4129	2.47918	LOC105607318	no
gene10964	4.64815	-1.17623	1.16965	-1.00563	0.314595	0.507455	1.9974	5.56747	0	14.6572	2.15651	0	6.03617	4.80737	6.61115	CRMP1	no
gene10965	613.152	0.375413	0.389906	0.962829	0.335633	0.529632	704.082	606.854	860.02	481.246	534.815	1094.96	460.761	353.342	422.287	LOC106991242	no
gene10966	530.88	0.0447829	0.35706	0.125421	0.90019	0.945501	345.55	674.592	605.753	663.647	565.006	262.79	624.744	554.05	481.787	LOC101113496	no
gene10967	589.691	-0.151593	0.342224	-0.442966	0.65779	0.794629	481.373	725.627	440.159	622.118	756.936	296.734	676.051	709.087	599.135	EVC2	no
gene10969	35.3279	-1.80154	0.463052	-3.89059	0.000100001	0.00130383	12.9831	13.9187	12.8202	42.3431	30.1912	38.3236	41.2472	88.9364	37.1877	STK32B	down
gene10971	0.41523	-1.78002	2.95037	-0.603321	0.546295	0.71465	0	0	0	0	1.07826	0	1.00603	0	1.65279	CYTL1	no
gene10972	1263.13	2.24575	0.486761	4.61366	3.96e-06	9.19e-05	3036.04	2206.57	2753.13	381.088	596.276	1315.05	272.634	394.205	413.197	MSX1	up
gene10974	806.372	-0.611637	0.203952	-2.99893	0.00270932	0.0171156	632.176	641.187	516.012	1058.58	935.927	744.572	809.853	929.025	990.019	STX18	no
gene10976	175.076	-0.105542	0.309613	-0.340885	0.733191	0.843701	198.741	149.394	151.705	114.001	149.878	222.277	235.411	152.634	201.64	LOC101103398	no
gene10977	438.056	-0.836183	0.277465	-3.01365	0.00258122	0.0165597	242.684	372.093	247.857	535.803	425.911	501.491	465.791	430.26	720.615	ZBTB49	no
gene10978	598.258	0.279655	0.369398	0.757058	0.449015	0.636819	782.979	631.908	618.573	505.674	663.128	984.368	452.713	342.525	402.454	LYAR	no
gene10979	569.862	0.0504073	0.197647	0.255037	0.798695	0.883415	631.177	481.586	636.735	543.132	541.285	548.574	534.201	679.041	533.024	TMEM128	no
gene10980	9.49906	1.33241	0.882503	1.5098	0.131094	0.280263	25.9662	3.71165	18.1619	13.8429	5.39128	0	3.01809	9.61474	5.78475	OTOP1	no
gene10981	6.44256	2.6238	0.87646	2.99363	0.00275683	0.0173111	17.9766	7.4233	18.1619	0.814291	1.07826	0	2.01206	7.21106	3.30557	DRD5	no
gene10982	42.34	-3.1404	0.580028	-5.41422	6.16e-08	2.74e-06	3.99479	12.9908	3.20504	61.0718	98.1213	40.5135	29.1748	60.0922	71.8962	SLC2A9	down
gene10984	4.46493	-4.19044	1.5059	-2.78268	0.00539113	0.0285608	0	0.927912	0	4.07145	12.9391	0	8.04823	8.4129	5.78475	LOC105607315	no
gene10986	2700.79	0.999979	0.429381	2.32889	0.0198651	0.0745048	4030.75	3524.21	4598.17	1463.28	2182.39	4309.76	1357.13	1307.61	1533.79	WDR1	no
gene10987	359.929	0.367267	0.236636	1.55203	0.120654	0.264809	337.56	441.686	490.371	295.587	306.225	417.179	290.742	364.158	295.849	ZNF518B	no
gene10988	43.3526	-2.01999	0.500402	-4.03674	5.42e-05	0.000804728	12.9831	14.8466	14.9569	58.6289	31.2694	28.4689	86.5185	93.7438	48.7572	CLNK	down
gene10992	213.966	-1.53581	0.561111	-2.73709	0.00619861	0.031722	78.8972	117.845	86.5361	356.659	263.095	42.7034	420.52	211.524	347.912	HS3ST1	no
gene10996	1706.19	-0.495273	0.274815	-1.8022	0.0715135	0.186071	1348.24	1394.65	1277.74	2011.3	2027.12	1098.24	1765.58	2418.11	2014.75	RAB28	no
gene10997	1.53047	0.565289	1.54536	0.365798	0.714516	0.830554	1.9974	1.85582	2.13669	5.70003	1.07826	0	1.00603	0	0	NKX3-2	no
gene10998	2395.97	0.341503	0.523817	0.651951	0.514433	0.689769	3005.08	2629.7	2728.56	2555.24	2677.31	352.577	2675.03	2050.34	2889.9	BOD1L1	no
gene110	811.345	-0.184073	0.431437	-0.426651	0.669634	0.80244	605.211	934.407	692.289	1104.18	699.789	302.209	1126.75	651.399	1185.87	ATG16L1	no
gene11000	5345.28	-0.735914	0.416854	-1.7654	0.0774963	0.195758	3145.9	3673.6	4288.35	6476.05	6135.28	2517.31	4992.92	11279.3	5598.82	CPEB2	no
gene11001	1686.44	-2.38316	0.517294	-4.60698	4.09e-06	9.42e-05	431.438	560.459	335.461	2337.83	2832.58	498.206	3855.1	2621.22	1705.68	C1QTNF7	down
gene11002	1289.93	-0.962781	0.365212	-2.63623	0.00838336	0.0397203	740.035	1040.19	589.728	1490.15	1629.25	675.59	1704.21	1946.99	1793.27	CC2D2A	no
gene11005	3680.06	-0.411633	0.240917	-1.70861	0.0875229	0.212967	2746.42	3240.27	3061.88	4212.32	4549.16	2566.58	4257.51	4034.59	4451.78	FBXL5	no
gene11007	84.8948	0.698911	0.48474	1.44183	0.149351	0.307606	101.867	76.0888	164.526	41.5288	91.6518	29.5639	121.73	55.2848	81.813	BST1	no
gene11010	2149.53	0.563389	0.946408	0.595292	0.551648	0.718457	5135.31	941.831	2143.1	1973.84	723.51	16.4244	3288.71	3585.1	1537.92	LOC101106941	no
gene11011	190.886	0.415044	0.515425	0.805246	0.420678	0.610292	180.764	350.751	155.979	328.159	121.843	148.914	243.459	62.4958	125.612	PROM1	no
gene11012	1302.15	-0.0861204	0.251764	-0.342067	0.7323	0.843059	1302.3	1379.81	1070.48	1322.41	1517.11	846.403	1445.66	1335.25	1499.9	TAPT1	no
gene11014	2915.51	-2.75435	0.588767	-4.67816	2.89e-06	7.03e-05	566.262	915.849	327.983	4452.54	6745.57	649.311	4162.95	3044.27	5374.86	LDB2	down
gene11018	807.11	0.422639	0.439914	0.960731	0.336688	0.530232	1332.26	579.017	1003.18	522.775	649.11	1466.15	560.358	698.271	452.864	QDPR	no
gene11019	0.543182	1.48849	2.75481	0.540325	0.588973	0.744854	2.99609	0	0	0.814291	1.07826	0	0	0	0	CLRN2	no
gene11023	326.119	-0.376647	0.609646	-0.617812	0.536699	0.707147	323.578	318.274	174.141	407.145	119.686	72.2673	479.876	641.784	398.322	LOC101117587	no
gene11024	36.9649	0.193704	0.659027	0.293925	0.768815	0.867439	49.9349	44.5398	26.7087	56.186	29.1129	2.18992	48.2894	36.0553	39.6669	MAN2B2	no
gene11025	1370.38	2.00183	0.338315	5.91704	3.28e-09	2.35e-07	2252.06	2622.28	3351.41	630.261	959.648	365.716	900.396	641.784	609.878	LOC101108390	up
gene11026	104.978	1.60524	0.298228	5.38261	7.34e-08	3.18e-06	162.788	180.943	226.49	65.1432	70.0867	35.0387	71.4281	70.9087	61.9795	BLOC1S4	up
gene11028	1282.57	0.0110413	0.465995	0.0236939	0.981097	0.991904	938.776	1543.12	1385.65	1583.8	1132.17	321.918	1662.97	1443.41	1531.31	KIAA0232	no
gene11029	2281.28	0.515915	0.246791	2.0905	0.0365733	0.115185	2848.29	2721.57	2990.3	2725.43	1519.26	1670.91	2286.7	1938.57	1830.46	TBC1D14	no
gene11030	1026.5	0.850715	0.355953	2.38996	0.0168501	0.066156	1744.73	1243.4	1392.06	654.69	710.571	1509.95	608.648	651.399	723.094	GRPEL1	no
gene11031	3009.04	1.63011	0.639122	2.55054	0.0107556	0.0477099	8367.09	2828.28	5256.27	2407.04	911.127	254.03	2936.6	2654.87	1466.02	SORCS2	no
gene11034	724.523	-0.839579	0.310133	-2.70715	0.00678626	0.0339849	368.52	592.936	462.594	939.691	876.623	458.788	885.305	920.612	1015.64	AFAP1	no
gene11035	232.108	-1.00469	0.438903	-2.28908	0.0220745	0.0803769	195.745	134.547	86.5361	199.501	211.338	188.333	341.044	205.515	526.413	ABLIM2	no
gene11036	338.951	-0.727472	0.346635	-2.09867	0.035846	0.113558	188.754	336.832	181.619	307.802	428.068	574.853	292.754	294.452	445.426	SH3TC1	no
gene11037	1015.17	-0.207382	0.671292	-0.30893	0.757375	0.85998	1077.6	468.596	1214.71	578.146	1647.58	2794.33	508.045	300.461	547.073	HTRA3	no
gene11038	1362.97	0.293379	0.239774	1.22356	0.221117	0.404054	1891.53	1387.23	1382.44	1420.12	1108.45	1100.43	1617.69	1056.42	1302.4	ACOX3	no
gene11042	674.062	-0.719657	0.635001	-1.13332	0.257081	0.445303	618.194	502.928	291.659	610.718	365.529	2392.48	436.617	364.158	484.267	TRMT44	no
gene11043	1145.92	-0.0529144	0.866305	-0.0610805	0.951295	0.975581	753.018	248.68	2352.5	388.417	1890.18	3579.42	442.653	295.653	362.787	CPZ	no
gene11044	1.69585	-3.78709	2.85933	-1.32447	0.185348	0.357262	0	0	0	0	4.31303	10.9496	0	0	0	HMX1	no
gene11045	33.0759	-1.07665	0.895498	-1.20229	0.22925	0.413721	21.9714	8.35121	26.7087	8.9572	32.3477	151.104	26.1568	7.21106	14.8751	ADRA2C	no
gene11048	1331.75	0.184353	0.280056	0.658272	0.510363	0.686867	1642.86	1356.61	1342.91	913.634	1135.4	1783.69	1503.01	987.915	1319.75	LRPAP1	no
gene11051	61.0513	0.584953	0.647814	0.902965	0.366544	0.559778	135.823	41.756	57.6908	26.8716	33.426	146.724	22.1326	42.0645	42.9725	HGFAC	no
gene11052	0.816764	1.33858	2.13371	0.627348	0.530431	0.702207	0	1.85582	2.13669	0	2.15651	0	0	1.20184	0	DOK7	no
gene11053	128.03	0.710479	0.522925	1.35866	0.174254	0.342375	150.803	194.862	173.072	168.558	112.139	18.6143	128.772	115.377	90.0769	RGS12	no
gene11054	43.0887	0.894629	0.476092	1.87911	0.0602298	0.164447	87.8854	38.9723	59.8275	28.5002	23.7216	70.0774	31.1869	22.835	24.7918	MSANTD1	no
gene11055	2030.64	0.796669	0.315246	2.52713	0.0114998	0.0500153	2363.92	3385.95	2745.65	2162.76	1233.53	1919.46	1974.83	983.108	1506.52	HTT	no
gene11056	1023.72	-0.102555	0.377606	-0.271594	0.785934	0.875488	931.785	1194.22	801.261	1071.61	867.997	1874.57	981.884	561.261	928.866	GRK4	no
gene11058	245.16	1.68018	0.320943	5.23513	1.65e-07	6.35e-06	406.47	467.668	485.03	126.215	149.878	83.2169	204.224	109.368	174.369	MFSD10	up
gene11059	2463.48	-0.180232	0.432162	-0.417048	0.676643	0.807579	2910.21	1970.88	1907	2089.47	2001.24	5543.78	2199.18	1572.01	1977.56	LOC106991221	no
gene11060	1603.96	0.382326	0.458973	0.833003	0.404843	0.596664	1373.21	2445.98	1877.09	1968.14	1256.17	431.414	1966.79	1218.67	1898.23	ADD1	no
gene11062	302.215	0.472466	0.352147	1.34167	0.179702	0.349817	440.426	435.191	238.241	245.101	262.016	432.509	227.363	175.469	263.62	SH3BP2	no
gene11063	1263.38	0.138564	0.247024	0.560936	0.574841	0.734232	1323.28	1461.46	1252.1	1361.49	977.979	1520.9	1402.4	885.758	1185.05	FAM193A	no
gene11064	2515.15	-0.0250166	0.338695	-0.0738617	0.94112	0.970345	2290.01	2948.9	2220.03	3192.83	2063.78	1326	2980.86	2188.56	3425.4	RNF4	no
gene11065	59.9887	-0.918182	0.594009	-1.54574	0.122168	0.267142	46.9388	27.8374	38.4605	122.958	69.0084	15.3294	36.217	62.4958	120.653	CFAP99	no
gene11066	0.386883	-1.56619	3.52429	-0.444399	0.656754	0.79435	0	0	0	0	1.07826	0	0	2.40369	0	ZFYVE28	no
gene11068	180.577	-0.343193	0.290419	-1.18172	0.237318	0.422698	151.802	192.078	115.382	208.458	194.086	234.321	230.381	133.405	165.279	POLN	no
gene11071	845.082	0.789088	0.286945	2.74996	0.00596017	0.0307855	1178.46	1474.45	872.84	878.62	672.832	457.693	786.715	608.133	675.99	NELFA	no
gene11072	1108.49	0.919986	0.339237	2.71192	0.00668939	0.0336516	1473.08	2009.86	1367.48	1446.18	729.98	862.828	855.125	626.16	605.746	WHSC1	no
gene11073	2462.84	0.922825	0.494816	1.86499	0.0621833	0.168024	4182.55	3069.53	3534.09	1272.74	1376.93	4763.07	1427.56	1078.05	1461.06	LETM1	no
gene11074	1846.39	1.53273	0.309098	4.95872	7.1e-07	2.17e-05	3328.66	3430.49	3066.16	1229.58	921.909	1845.01	1082.49	904.988	808.213	FGFR3	up
gene11075	21.7621	0.00570947	0.617599	0.00924463	0.992624	0.998006	31.9583	19.4862	13.8885	16.2858	16.1738	55.8429	18.1085	8.4129	15.7015	LOC106991222	no
gene11077	21.6111	0.736906	1.01369	0.726953	0.467255	0.65232	36.9518	27.8374	23.5036	7.32861	12.9391	71.1723	4.02412	0	10.7431	LOC106991247	no
gene11078	127.203	2.96466	0.297868	9.95293	2.45e-23	4.83e-20	284.629	302.499	323.709	36.6431	47.4433	54.7479	40.2412	27.6424	27.271	LOC106990166	up
gene11079	787.301	0.961139	0.53374	1.80076	0.0717402	0.186443	1468.09	959.461	1067.28	464.96	455.024	1592.07	393.357	368.966	316.509	TMEM129	no
gene11080	1128.32	0.783127	0.265489	2.94975	0.00318028	0.0192552	1658.84	1431.77	1605.73	874.548	837.805	1345.7	959.752	712.693	728.053	SLBP	no
gene11081	513.149	1.05605	0.190684	5.53823	3.06e-08	1.5e-06	810.943	767.383	775.62	344.445	406.503	386.52	452.713	319.69	354.523	CTBP1	up
gene11082	789.427	-0.657098	0.910294	-0.721853	0.470385	0.654625	599.219	444.47	666.649	105.858	795.753	3723.95	233.399	222.341	313.203	SPON2	no
gene11083	3.88914	-4.00037	1.5645	-2.55696	0.010559	0.0471361	0	0.927912	0	4.88574	3.23477	0	14.0844	3.60553	8.26394	LOC101105412	no
gene11086	65.5793	-0.0319336	0.63483	-0.0503026	0.959881	0.980352	72.905	55.6747	65.1692	16.2858	75.478	159.864	51.3075	21.6332	71.8962	FGFRL1	no
gene11087	348.307	0.896715	0.571231	1.5698	0.116463	0.258439	573.253	411.065	526.695	127.844	286.816	727.053	132.796	141.817	207.425	IDUA	no
gene11090	195.489	1.33738	0.378804	3.53053	0.000414729	0.00404657	292.619	496.433	193.371	129.472	94.8866	125.92	172.031	87.7345	166.931	TMEM175	up
gene11091	1677.04	1.30147	0.27953	4.65595	3.22e-06	7.68e-05	2968.13	2913.64	2450.79	1156.29	986.605	1617.25	1181.08	727.115	1092.49	GAK	up
gene11092	14.4452	-1.42887	0.650434	-2.1968	0.0280349	0.095739	3.99479	12.9908	3.20504	18.7287	23.7216	5.47479	15.0904	22.835	23.9654	CPLX1	no
gene11094	204.203	0.719607	0.433207	1.66112	0.0966898	0.227269	249.675	275.59	304.479	118.072	136.939	356.957	153.922	90.1382	152.056	UVSSA	no
gene11095	1472.34	0.150337	0.299107	0.50262	0.615232	0.763258	1608.9	1642.4	1477.52	1344.39	1104.13	2278.61	1531.18	1078.05	1185.87	MAEA	no
gene11096	8.39575	-2.53045	0.87662	-2.8866	0.00389429	0.0224237	2.99609	1.85582	1.06835	4.07145	16.1738	17.5193	6.03617	19.2295	6.61115	LOC101108322	no
gene11097	24.581	0.510946	0.978499	0.522173	0.60155	0.75355	55.9271	9.27912	26.7087	5.70003	15.0956	89.7866	6.03617	3.60553	9.09033	LOC105601929	no
gene11098	88.542	1.21085	0.384868	3.14615	0.00165434	0.0117747	104.863	150.322	173.072	84.6862	64.6954	27.374	69.416	48.0737	74.3754	PCGF3	no
gene11099	144.874	0.933536	0.251688	3.7091	0.000207997	0.00233329	244.681	182.799	209.396	104.229	92.7301	120.445	147.886	103.359	98.3408	MFSD7	no
gene111	53.7476	-0.0239635	0.547825	-0.043743	0.965109	0.98344	32.957	73.305	53.4174	86.3148	45.2868	10.9496	69.416	49.2756	62.8059	LOC105616381	no
gene11100	2100.85	-0.95254	0.628474	-1.51564	0.129611	0.278244	2312.98	631.908	936.941	881.877	2629.87	5118.93	1165.99	4046.61	1182.57	ATP5I	no
gene11104	791.06	-0.145499	0.179834	-0.809074	0.418472	0.608768	717.065	814.707	684.811	872.105	748.31	911.006	783.697	712.693	875.151	PIGG	no
gene11107	4989.31	-1.41337	0.514566	-2.74672	0.00601944	0.0310015	2097.27	3432.35	1567.27	7916.53	6877.12	1277.82	6207.2	7540.36	7987.92	MCC	no
gene11109	1274.15	0.107377	0.213428	0.503106	0.61489	0.763101	1037.65	1316.71	1660.21	1217.36	1194.71	1120.14	1233.39	1414.57	1272.65	DCP2	no
gene1111	7.89886	-1.33984	1.2419	-1.07886	0.280649	0.470745	6.99089	4.63956	0	4.88574	7.5478	36.1336	0	8.4129	2.47918	LOC105615520	no
gene11111	4629.76	0.688129	0.216013	3.1856	0.00144456	0.0106222	5567.74	5214.87	7808.55	3290.55	3880.65	4152.08	4186.09	3431.26	4136.1	REEP5	no
gene11112	1423.67	-0.678131	0.507617	-1.33591	0.181579	0.35244	1207.43	860.174	982.88	1074.86	1354.29	4170.7	963.776	1081.66	1117.28	SRP19	no
gene11113	1719.64	0.189005	0.353059	0.535336	0.592418	0.746773	1588.93	1832.63	2197.59	1736.88	1842.74	677.779	1939.62	1773.92	1886.66	APC	no
gene11117	2055.37	-1.14382	0.432199	-2.64652	0.0081325	0.0388217	1185.45	1507.86	720.066	4016.9	1889.11	1021.6	3201.18	2463.78	2492.4	EPB41L4A	no
gene11120	705.047	0.239206	0.297775	0.80331	0.421796	0.611	761.008	746.969	847.2	656.318	704.102	347.102	691.142	817.253	774.331	NREP	no
gene11121	1619.58	-0.462011	0.249945	-1.84845	0.0645368	0.172542	1053.63	1436.41	1392.06	1809.35	1793.14	1267.96	1577.45	2005.88	2240.35	YTHDC2	no
gene11122	172.7	-0.683103	0.407334	-1.67701	0.0935407	0.222309	77.8985	196.717	94.0146	201.944	258.782	127.015	165.995	284.837	147.098	KCNN2	no
gene11124	288.804	0.262591	0.408895	0.642197	0.520745	0.695352	302.606	323.841	348.281	286.63	221.043	91.9765	304.827	360.553	359.481	TRIM36	no
gene11126	711.4	-0.059647	0.218223	-0.27333	0.784599	0.875488	636.171	681.087	758.527	700.29	811.927	523.39	714.281	836.483	740.449	PGGT1B	no
gene11127	662.765	-0.654237	0.37238	-1.75691	0.0789334	0.198218	632.176	390.651	415.587	708.433	912.205	349.292	849.088	640.582	1066.87	CCDC112	no
gene1113	13.6012	0.250257	0.757432	0.330401	0.741097	0.849179	22.9701	12.9908	9.61513	9.77149	21.5651	0	17.1025	16.8258	11.5695	LOC101119949	no
gene11132	1599.87	0.470954	0.268161	1.75623	0.0790484	0.198297	1538.99	1802.01	2553.35	1574.84	1439.47	989.843	1288.72	1688.59	1523.04	FEM1C	no
gene11136	333.288	0.266226	0.242548	1.09762	0.272369	0.461388	276.639	461.172	388.878	384.345	291.129	316.443	298.791	276.424	305.766	LOC105601870	no
gene11137	3284.44	0.462712	0.247345	1.87072	0.0613844	0.166525	3995.79	3098.3	4964.61	2565.02	3134.49	3059.31	2623.72	3706.48	2412.24	TMED7	no
gene11138	668.081	0.84112	0.482611	1.74285	0.0813593	0.202407	1341.25	589.224	910.232	469.031	769.875	333.962	823.938	590.105	185.112	CDO1	no
gene11139	958.539	0.198539	0.167522	1.18516	0.235956	0.421116	1035.65	988.226	1121.76	842.791	863.683	834.359	971.824	931.428	1037.12	ATG12	no
gene11141	1382.7	-0.572029	0.307344	-1.8612	0.062716	0.169052	1178.46	936.263	1017.07	1289.02	1485.84	1064.3	1326.95	2474.59	1671.79	AP3S1	no
gene11142	377.619	-1.32915	0.365563	-3.63591	0.000277002	0.00293039	164.785	176.303	223.285	535.803	458.259	432.509	710.256	213.928	483.44	LVRN	down
gene11143	165.623	-2.81068	0.515923	-5.44787	5.1e-08	2.35e-06	20.9727	56.6026	21.3669	285.002	239.373	120.445	412.472	115.377	218.994	ARL14EPL	down
gene11144	1411.02	0.329568	0.265222	1.24261	0.214011	0.395136	1619.89	1415.07	1865.33	1126.16	1147.26	1934.79	1233.39	1051.61	1305.7	KIAA1191	no
gene11145	227.637	-1.22462	0.38203	-3.20556	0.00134799	0.010096	114.85	174.447	71.5793	270.344	253.39	155.484	314.887	289.644	404.106	SIMC1	no
gene11146	178.457	-1.40763	0.624199	-2.25509	0.0241276	0.0858804	78.8972	102.07	73.716	187.287	282.503	19.7093	271.628	254.791	335.516	LOC106990212	no
gene11148	305.588	0.411885	0.410165	1.0042	0.315284	0.508198	431.438	329.409	337.598	224.744	252.312	570.474	181.085	193.497	229.737	THOC3	no
gene11149	2.26258	-4.20382	1.89408	-2.21945	0.0264561	0.0917579	0	0	0	0	5.39128	4.37984	0	4.80737	5.78475	CPLX2	no
gene11150	4.48214	1.38362	0.903764	1.53096	0.12578	0.272418	3.99479	9.27912	9.61513	4.07145	1.07826	0	7.0422	3.60553	1.65279	HRH2	no
gene11151	3828.29	-0.911924	0.255137	-3.57426	0.000351226	0.00356411	1735.74	3290.38	2207.21	4678.1	4697.96	3834.55	4110.63	4859.05	5041	SFXN1	no
gene11152	9.62776	0.346721	0.919293	0.377161	0.706054	0.825868	0.998698	16.7024	16.0252	9.77149	6.46954	0	11.0663	13.2203	12.3959	DRD1	no
gene11157	721.432	-0.127071	0.460764	-0.275784	0.782714	0.875488	580.244	714.492	744.638	1060.21	520.798	206.947	786.715	959.071	919.776	GCNT4	no
gene11159	621.774	-1.83154	0.567205	-3.22907	0.00124195	0.00951087	260.66	274.662	153.842	429.131	717.041	166.434	1205.22	1319.62	1069.35	ANKRD31	down
gene11160	8657.58	1.33876	0.57383	2.33303	0.0196468	0.074011	17734.9	7196.89	18580.7	6262.71	2778.67	1390.6	10747.4	7012.75	6213.65	HMGCR	no
gene11161	3334.75	-0.489589	0.422297	-1.15935	0.246314	0.432924	2748.42	2190.8	2942.23	4054.35	3732.92	1096.05	4145.85	4966.02	4136.1	COL4A3BP	no
gene11162	451.053	-0.70548	0.50754	-1.39	0.164529	0.328725	210.725	392.507	349.35	526.032	586.572	109.496	495.972	787.207	601.614	POLK	no
gene11163	8.33785	-1.27981	0.720728	-1.77572	0.0757789	0.192957	5.99219	3.71165	3.20504	9.77149	15.0956	4.37984	7.0422	6.00922	19.8334	ANKDD1B	no
gene11166	338.224	-0.0884833	0.331383	-0.267012	0.78946	0.877188	306.6	356.318	310.889	350.145	368.764	157.674	398.387	360.553	434.683	POC5	no
gene11167	17.8985	-1.39816	0.57111	-2.44815	0.0143593	0.0589882	14.9805	6.49538	4.27339	40.7145	21.5651	13.1395	22.1326	20.4313	17.3543	SV2C	no
gene11168	1729.25	-0.829766	0.380859	-2.17867	0.0293559	0.0987465	1147.5	1226.7	1042.71	1954.3	2742.01	746.762	2165.98	2080.39	2456.87	IQGAP2	no
gene11170	1059.12	1.39408	0.31862	4.37538	1.21e-05	0.000237306	1456.1	1712	2244.6	521.96	803.301	397.47	827.962	849.703	718.962	F2R	up
gene11172	1063.37	1.14983	0.237363	4.84417	1.27e-06	3.51e-05	1413.16	1445.69	2174.09	700.29	796.832	897.866	678.064	817.253	647.066	F2RL1	up
gene11173	11.9696	-0.547441	0.554171	-0.987856	0.323223	0.517006	7.98959	12.0629	7.47843	15.4715	14.0173	16.4244	6.03617	8.4129	19.8334	S100Z	no
gene11175	8.45592	-0.927301	0.913549	-1.01505	0.310081	0.502501	9.98698	3.71165	2.13669	9.77149	12.9391	0	5.03014	16.8258	15.7015	CRHBP	no
gene11176	83.9921	0.577955	0.58265	0.991942	0.321226	0.514877	67.9115	93.7191	161.32	51.3003	92.7301	12.0445	82.4944	124.992	69.4171	LOC101106776	no
gene11177	1921.84	-0.034125	0.215985	-0.157997	0.874459	0.931428	2036.35	1594.15	2044.82	1925.8	2060.55	1446.44	2279.66	1962.61	1946.16	AGGF1	no
gene11178	141.327	-0.582889	0.690267	-0.844439	0.398424	0.590438	85.888	129.908	102.561	111.558	217.808	8.75967	243.459	140.616	231.39	ZBED3	no
gene11179	1094.1	-1.70258	0.482068	-3.53182	0.000412714	0.00403578	331.568	671.808	307.684	1687.21	1636.79	367.906	1710.25	1566	1567.67	PDE8B	down
gene11181	1140.71	-0.73347	0.210144	-3.49032	0.00048245	0.00456925	794.964	895.435	682.674	1289.02	1227.06	1691.71	1160.96	1290.78	1233.81	WDR41	no
gene11183	1.2388	-2.22856	1.74046	-1.28044	0.200389	0.376602	0.998698	0	0	0.814291	2.15651	1.09496	0	3.60553	2.47918	OTP	no
gene11184	2770.81	-0.985772	0.363388	-2.71272	0.00667327	0.0335895	2529.7	1212.78	1284.15	2727.87	3345.83	3339.62	2461.75	5350.61	2684.95	TBCA	no
gene11186	2850.11	-0.593089	0.367792	-1.61257	0.106839	0.243674	1985.41	2359.68	2040.54	3604.05	3752.33	1277.82	2913.46	4367.5	3350.2	AP3B1	no
gene11188	1384.29	-0.713273	0.381352	-1.87038	0.0614313	0.1666	926.792	791.509	1193.34	1405.47	1617.38	662.45	1616.69	2361.62	1883.35	SCAMP1	no
gene11190	32.7927	-0.00695814	0.483131	-0.0144022	0.988509	0.996402	17.9766	41.756	38.4605	35.8288	30.1912	10.9496	46.2773	34.8534	38.8405	LHFPL2	no
gene11193	855.425	0.282733	0.283326	0.997906	0.318325	0.511706	595.224	1311.14	1005.31	851.748	715.962	770.851	688.124	873.74	886.72	ARSB	no
gene11194	21.6115	-1.23773	0.507557	-2.43861	0.0147439	0.0600371	12.9831	17.6303	3.20504	25.243	22.6434	18.6143	30.1809	27.6424	36.3613	DMGDH	no
gene11197	25.32	-1.32191	0.42527	-3.10839	0.00188107	0.0129979	18.9753	7.4233	11.7518	35.0145	23.7216	27.374	29.1748	37.2571	37.1877	BHMT	no
gene11198	4030.82	0.523853	0.314958	1.66324	0.0962634	0.226567	4082.68	4657.19	6432.52	3622.78	3693.03	1934.79	3431.56	4767.71	3655.14	JMY	no
gene11201	697.225	-0.0599028	0.34467	-0.173797	0.862025	0.923494	547.287	766.455	720.066	697.033	990.918	422.654	574.443	1010.75	545.42	HOMER1	no
gene11202	2171.58	-0.853449	0.328952	-2.59445	0.00947432	0.0433845	1412.16	1537.55	1286.29	2351.67	2881.1	1341.32	2116.68	3694.47	2922.95	PAPD4	no
gene11203	711.769	-0.518138	0.46274	-1.11972	0.262834	0.451131	528.311	612.422	517.08	860.705	672.832	193.808	969.812	1044.4	1006.55	CMYA5	no
gene11204	408.282	-0.178099	0.197777	-0.900503	0.367853	0.561052	360.53	449.109	316.231	438.088	416.207	377.761	409.454	454.297	452.864	MTX3	no
gene11205	454.649	0.949676	0.386093	2.45971	0.0139051	0.0576404	914.808	596.647	498.918	397.374	267.408	525.58	436.617	185.084	269.404	THBS4	no
gene11206	3478.29	0.490247	0.215097	2.2792	0.0226554	0.0818544	4017.76	4067.04	4831.07	3874.39	2827.19	3241.08	2445.66	3211.32	2789.08	SERINC5	no
gene11207	493.436	-0.517085	0.229197	-2.25608	0.0240657	0.0857102	333.565	411.993	403.835	443.788	653.423	487.257	495.972	670.628	540.461	GNPNAT1	no
gene11208	1180.64	-0.463937	0.347678	-1.33439	0.182077	0.35306	837.908	1018.85	970.059	1047.18	1449.18	664.64	1200.19	2026.31	1411.48	STYX	no
gene11210	3691	-0.544546	0.345074	-1.57806	0.114553	0.255749	3152.89	2664.96	2662.32	3555.19	4545.93	2299.41	3402.39	6846.9	4089	PSMC6	no
gene11211	1034.82	-0.0863696	0.359154	-0.240481	0.809958	0.890712	754.017	948.326	1279.88	1151.41	857.214	505.871	1388.32	1130.93	1297.44	ERO1A	no
gene11212	197.902	-1.25955	0.516601	-2.43814	0.014763	0.0600865	123.839	134.547	49.144	273.602	263.095	59.1278	286.718	336.516	254.529	GPR137C	no
gene11213	239.666	-0.243027	0.5641	-0.430823	0.666597	0.800476	127.833	318.274	194.439	232.073	271.721	40.5135	297.785	367.764	306.592	TXNDC16	no
gene11214	126.483	1.24337	0.478411	2.59896	0.00935072	0.0429894	80.8946	225.483	310.889	114.001	121.843	41.6084	100.603	76.918	66.1115	PTGER2	no
gene11215	11.5947	-2.83432	0.846097	-3.34987	0.000808491	0.00679916	0	4.63956	2.13669	26.8716	11.8608	4.37984	23.1387	15.624	15.7015	ANKDD1A	down
gene11216	665.892	0.155699	0.244251	0.637456	0.523828	0.697538	764.004	579.945	800.192	673.418	614.606	465.357	790.739	713.895	590.871	SPG21	no
gene11217	847.328	-1.05504	0.205795	-5.12665	2.95e-07	1.03e-05	513.331	560.459	404.904	988.549	910.049	1200.07	901.402	1058.82	1088.36	MTFMT	down
gene11218	134.766	-0.122458	0.464222	-0.263792	0.79194	0.878997	55.9271	139.187	186.961	136.801	191.93	99.6413	156.941	63.6977	181.807	SLC51B	no
gene11219	582.823	1.1466	0.300851	3.81117	0.00013831	0.00168573	1008.69	1108.85	638.872	523.589	491.685	297.829	408.448	311.277	456.169	RASL12	up
gene11221	20.9394	-3.206	0.750309	-4.2729	1.93e-05	0.000347848	2.99609	6.49538	0	34.2002	24.7999	7.66471	38.2291	36.0553	38.0141	UBAP1L	down
gene11222	574.762	0.318719	0.229241	1.39032	0.164431	0.3287	751.021	661.601	573.703	461.703	568.241	687.634	550.298	456.7	461.954	PDCD7	no
gene11224	2515.38	-0.0771407	0.307239	-0.251077	0.801755	0.885386	2123.23	2198.22	2958.25	2632.6	2270.81	1461.77	2678.05	3571.88	2743.63	CLPX	no
gene11225	519.914	0.950181	0.343217	2.76846	0.00563226	0.0295561	468.389	617.061	1213.64	299.659	426.99	346.007	428.568	485.545	393.363	CILP	no
gene11226	716.981	0.032369	0.445722	0.0726215	0.942107	0.970616	644.16	709.853	829.038	482.06	467.963	1619.44	552.31	534.82	613.184	PARP16	no
gene11227	146.929	-0.596236	0.595419	-1.00137	0.316647	0.509681	155.797	102.07	70.5109	94.4577	119.686	423.749	62.3738	199.506	94.2089	IGDCC3	no
gene11228	218.055	0.121088	0.279252	0.433613	0.664569	0.798857	196.744	234.762	259.608	209.273	317.007	175.193	204.224	197.102	168.584	IGDCC4	no
gene11229	2052.91	-0.461692	0.334155	-1.38167	0.167073	0.332201	1239.38	1767.67	1914.48	2257.21	2003.4	1136.57	2666.98	2608	2882.46	DPP8	no
gene11230	2144.02	0.405978	0.242971	1.67089	0.0947427	0.224153	2536.69	2330.91	2821.51	2184.74	1843.82	1785.88	2132.78	2348.4	1311.49	HACD3	no
gene11231	327.833	0.372964	0.281084	1.32688	0.184548	0.356296	322.58	433.335	403.835	381.088	282.503	394.185	277.664	224.745	230.564	VWA9	no
gene11232	223.999	-1.83758	0.374388	-4.90823	9.19e-07	2.7e-05	87.8854	105.782	53.4174	304.545	299.755	150.009	290.742	436.269	287.585	SLC24A1	down
gene11233	1381.75	-1.23958	0.430558	-2.87901	0.0039893	0.0228375	427.443	832.337	913.437	1401.39	1803.92	728.148	1476.85	2038.33	2813.87	DENND4A	no
gene11236	4856.46	0.530495	0.21569	2.45953	0.0139119	0.0576404	6439.61	4981.03	6907.93	3852.41	3779.29	4824.39	4399.36	4951.59	3572.5	RAB11A	no
gene11238	295.572	-0.2539	0.261091	-0.972459	0.330822	0.524952	221.711	334.976	228.626	267.087	281.425	260.6	351.104	401.416	313.203	MEGF11	no
gene11239	842.45	0.413236	0.205017	2.01562	0.0438397	0.131128	867.869	1003.07	1160.23	748.333	651.267	767.566	894.36	664.619	824.741	DIS3L	no
gene1124	13.6282	-0.299099	0.647602	-0.461856	0.644185	0.785923	7.98959	8.35121	19.2303	18.7287	20.4869	2.18992	18.1085	16.8258	10.7431	LOC101120207	no
gene11240	597.894	-0.345457	0.277142	-1.2465	0.212581	0.393149	494.356	520.559	504.26	534.989	562.85	979.988	685.106	610.536	488.399	TIPIN	no
gene11241	784.047	-0.797132	0.456473	-1.74628	0.0807614	0.201314	379.505	679.232	518.149	913.634	838.884	290.164	901.402	944.649	1590.81	MAP2K1	no
gene11242	308.779	-0.0377577	0.327554	-0.115272	0.90823	0.950473	281.633	372.093	256.403	345.259	263.095	504.776	247.483	222.341	285.932	SNAPC5	no
gene11243	74623.6	-0.0235127	0.480892	-0.0488939	0.961004	0.980898	97327.1	55602.3	68515.3	66317.5	58395.1	175213	58532.8	52907.5	38801.7	RPL4	no
gene11244	391.191	-0.496772	0.450953	-1.1016	0.270634	0.4595	208.728	466.74	245.72	570.818	437.772	142.345	480.882	420.645	547.073	ZWILCH	no
gene11245	41.5568	-1.22612	0.49594	-2.47233	0.0134237	0.0561948	36.9518	12.9908	16.0252	37.4574	25.8782	66.7925	57.3437	42.0645	78.5074	LCTL	no
gene11246	1327.6	0.307779	0.240357	1.28051	0.200367	0.376602	1602.91	1758.39	1206.16	1212.48	1552.69	1289.86	1304.82	969.887	1051.17	SMAD6	no
gene11248	1122.73	-0.134708	0.234218	-0.575141	0.565196	0.727986	885.845	1287.94	988.221	1284.95	986.605	1361.03	1191.14	909.795	1209.01	SMAD3	no
gene11249	489.49	0.112943	0.196415	0.57502	0.565277	0.727986	501.346	502.928	542.72	593.618	449.633	431.414	431.586	442.278	509.885	AAGAB	no
gene1125	201.476	-1.20048	0.56728	-2.1162	0.0343275	0.110068	77.8985	125.268	120.723	105.043	221.043	649.311	123.742	164.652	225.605	FCGR1A	no
gene11251	35.5799	-1.20804	0.485193	-2.48981	0.012781	0.0541552	29.9609	12.9908	13.8885	30.1288	26.9564	76.6471	43.2592	51.6793	34.7085	IQCH	no
gene11253	98.7331	-0.276487	0.366101	-0.755221	0.450117	0.637663	114.85	73.305	71.5793	69.2147	106.747	119.351	138.832	62.4958	132.223	C7H15orf61	no
gene11254	1939.74	-1.23827	0.316594	-3.91124	9.18e-05	0.00121866	1070.6	1205.36	776.689	2659.47	2546.84	1294.24	2561.35	3141.62	2201.51	MAP2K5	down
gene11257	1.09247	-1.09942	2.54631	-0.431771	0.665908	0.79981	0	1.85582	0	0	0	0	3.01809	0	4.95836	SKOR1	no
gene11258	3537.56	-0.704417	0.43603	-1.61552	0.106197	0.242616	2499.74	2672.39	2303.36	4588.53	4058.56	1124.52	4441.62	5895.04	4254.27	PIAS1	no
gene11259	521.023	-1.1841	0.505541	-2.34225	0.019168	0.0728666	351.542	257.96	236.105	430.76	452.868	1628.2	495.972	411.03	424.766	CALML4	no
gene1126	141.741	0.104565	0.407564	0.256562	0.797517	0.882606	174.772	78.8725	192.303	129.472	98.1213	226.656	136.82	150.23	88.4241	LOC101120455	no
gene11260	124.255	0.885922	0.425699	2.0811	0.0374248	0.116985	190.751	179.087	167.731	123.772	89.4953	29.5639	125.754	86.5327	125.612	CLN6	no
gene11262	3392.9	0.409613	0.248405	1.64897	0.0991533	0.230964	3852.98	3481.53	4852.43	3305.21	2495.09	2445.04	3459.73	3912	2732.06	FEM1B	no
gene11263	538.488	-0.386996	0.325971	-1.18721	0.235144	0.420047	342.553	584.585	413.45	504.86	646.954	559.524	729.371	332.911	732.185	ITGA11	no
gene11264	932.379	-1.0415	0.336922	-3.0912	0.00199347	0.0135737	514.33	694.078	431.612	1140.82	1372.62	694.204	1249.49	757.161	1537.09	CORO2B	no
gene11266	839.383	-0.610055	0.377696	-1.6152	0.106267	0.242712	729.05	626.341	508.533	938.063	773.11	1817.63	783.697	644.188	733.837	ANP32A	no
gene11267	34.7655	-1.26853	0.65459	-1.9379	0.0526352	0.149623	15.9792	25.9815	11.7518	40.7145	58.2259	4.37984	35.211	52.8811	67.7643	LOC101106331	no
gene11269	296.647	0.2873	0.520111	0.552382	0.580687	0.739252	203.734	314.562	493.577	159.601	227.512	96.3564	532.189	283.635	358.655	NOX5	no
gene1127	8.52031	-0.702627	0.843547	-0.832943	0.404877	0.596664	9.98698	3.71165	4.27339	12.2144	20.4869	15.3294	3.01809	6.00922	1.65279	LOC101120877	no
gene11271	1815.16	-0.48822	0.332782	-1.46709	0.142353	0.297399	1433.13	1406.71	1452.95	1691.28	2389.42	1135.47	1499.99	2916.87	2410.59	GLCE	no
gene11272	850.306	0.232606	0.398338	0.583942	0.559259	0.72413	699.089	1201.65	931.599	1047.18	957.492	302.209	753.516	769.18	990.846	PAQR5	no
gene11273	632.905	-0.330475	0.262978	-1.25667	0.208875	0.388195	527.313	631.908	461.526	635.147	590.885	508.061	710.256	679.041	952.005	KIF23	no
gene11275	43316.9	0.542287	0.530649	1.02193	0.306813	0.499165	74706.6	38549.2	51005	16855	35472.5	88618.3	25463.6	40546.6	18635.2	RPLP1	no
gene1128	0.721577	-1.30566	2.36301	-0.552542	0.580577	0.739219	0	0	1.06835	0.814291	0	0	1.00603	3.60553	0	LOC101115753	no
gene11280	2907.9	0.983723	0.259046	3.79748	0.000146172	0.0017658	4687.89	4102.3	4222.11	2807.67	1982.91	2794.33	2108.64	1534.75	1930.46	TLE3	no
gene11282	6302.94	-0.0196653	0.212618	-0.092491	0.926308	0.961053	6125.02	5257.55	7355.57	6871.8	7342.93	5960.96	6536.17	4987.65	6288.85	UACA	no
gene11283	244.811	0.776829	0.460553	1.68673	0.0916554	0.219177	312.593	297.86	405.972	146.572	260.938	375.571	198.188	84.129	121.48	LARP6	no
gene11285	3.19552	1.02525	1.12792	0.90897	0.363366	0.556674	5.99219	1.85582	6.41008	0	1.07826	4.37984	1.00603	7.21106	0.826394	THAP10	no
gene11286	150.434	-0.859525	0.495032	-1.7363	0.0825107	0.204498	103.865	79.8004	108.971	161.23	181.147	44.8933	138.832	247.58	287.585	LRRC49	no
gene11287	2972.1	-1.55094	0.59928	-2.58801	0.00965312	0.0439869	1458.1	1759.32	681.606	5540.43	2957.66	595.658	5534.17	5545.3	2676.69	THSD4	no
gene11289	14.2384	-0.0314419	0.495353	-0.0634737	0.949389	0.974354	14.9805	18.5582	8.54678	13.0286	7.5478	17.5193	14.0844	13.2203	20.6598	NR2E3	no
gene1129	0.230486	0.485736	3.53382	0.137453	0.890672	0.93984	0	0	1.06835	0	0	0	1.00603	0	0	LOC101121387	no
gene11290	3025.27	-0.814301	0.456674	-1.78311	0.074568	0.191217	1738.73	2275.24	2013.83	3646.39	3955.05	924.145	3928.54	5480.4	3265.08	MYO9A	no
gene11293	451.05	-1.15059	0.30541	-3.76737	0.00016498	0.001927	295.615	200.429	249.993	499.16	463.65	787.275	446.677	704.28	412.37	SENP8	down
gene11294	203.651	0.263332	0.442515	0.595082	0.551789	0.718561	283.63	204.141	199.781	213.344	71.1649	110.591	217.302	280.029	252.876	GRAMD2	no
gene11295	6657.69	0.300973	0.524272	0.574077	0.565916	0.728208	8022.54	6878.61	7938.89	4950.89	4805.79	16245.9	3966.77	2948.12	4161.72	LOC101110145	no
gene11296	65.4682	0.835237	0.461887	1.80831	0.0705576	0.184472	111.854	66.8097	99.3563	74.9147	60.3824	20.8042	78.4703	46.8719	29.7502	CELF6	no
gene11297	1426.13	-0.0703902	0.526324	-0.133739	0.893609	0.94169	1688.8	1104.22	1347.19	943.763	982.292	3864.11	1059.35	902.584	942.915	HEXA	no
gene113	763.7	-1.43111	0.379843	-3.76763	0.000164806	0.00192696	251.672	511.279	311.957	858.262	1001.7	445.648	1096.57	1181.41	1214.8	INPP5D	down
gene1130	7.3439	-1.04053	0.893744	-1.16423	0.24433	0.430736	6.99089	3.71165	2.13669	2.44287	3.23477	26.279	9.05426	4.80737	7.43754	LOC101121643	no
gene11300	53.4709	-1.8908	0.66975	-2.82314	0.00475551	0.0260861	9.98698	34.3327	12.8202	151.458	78.7127	17.5193	67.4039	28.8442	80.1602	LOC101116319	no
gene11302	3865.24	-0.423706	0.406298	-1.04285	0.297019	0.488648	2679.51	3517.71	3248.84	5265.2	4441.34	1544.99	3113.66	5863.79	5112.07	ARIH1	no
gene11304	1837.5	-0.508471	0.180222	-2.82136	0.00478198	0.0261771	1427.14	1468.88	1404.88	2078.07	1793.14	2508.55	2007.03	1866.46	1983.34	BBS4	no
gene11305	691.478	-0.304342	0.234459	-1.29806	0.194267	0.368983	497.352	690.366	605.753	747.519	691.162	982.178	623.738	651.399	733.837	ADPGK	no
gene11306	2746.15	0.0324573	0.377962	0.0858745	0.931566	0.964142	2611.6	3227.28	2523.44	3147.23	3786.84	1122.33	2642.84	3445.68	2208.12	NEO1	no
gene11307	23.9492	-1.20421	0.740928	-1.62528	0.104103	0.239031	4.99349	19.4862	13.8885	6.51432	26.9564	66.7925	25.1507	9.61474	42.1461	HCN4	no
gene11309	87.5124	-1.24407	0.368969	-3.37174	0.000746954	0.00638326	59.9219	47.3235	29.9137	108.301	100.278	73.3622	78.4703	145.423	144.619	REC114	down
gene1131	5.60561	-0.371015	1.06755	-0.347537	0.728188	0.840395	9.98698	0.927912	3.20504	13.0286	4.31303	0	2.01206	12.0184	4.95836	LOC101116011	no
gene11310	3009.86	0.380809	0.269535	1.41284	0.157704	0.318746	3588.32	3326.56	3766.99	2927.37	3084.89	1565.79	2672.01	3151.23	3005.59	NPTN	no
gene11311	556.84	0.0791505	0.405426	0.195228	0.845215	0.913498	412.462	658.817	661.307	570.003	597.354	223.372	665.991	407.425	814.824	CD276	no
gene11314	65.4353	0.00566838	0.565836	0.0100177	0.992007	0.997842	57.9245	57.5305	81.1944	26.8716	53.9128	166.434	66.3979	34.8534	43.7989	C7H15orf59	no
gene11315	6.72268	-1.3921	1.19072	-1.16912	0.242356	0.42832	0	7.4233	2.13669	1.62858	3.23477	33.9437	4.02412	4.80737	3.30557	TBC1D21	no
gene11316	297.945	0.565887	0.440228	1.28544	0.198638	0.374262	443.422	344.255	352.555	240.216	221.043	558.429	183.097	194.699	143.792	SDR39U1	no
gene11317	790.484	1.42128	0.206603	6.87927	6.02e-12	9.62e-10	1528.01	1170.1	1373.89	450.303	542.363	583.613	547.28	504.774	414.023	KHNYN	up
gene11319	247.867	1.78543	0.34875	5.11951	3.06e-07	1.06e-05	322.58	537.261	552.336	136.801	169.286	78.837	188.127	100.955	144.619	NYNRIN	up
gene11320	420.674	0.307801	0.51598	0.596537	0.550817	0.717794	600.218	432.407	414.519	243.473	325.633	989.843	327.965	211.524	240.481	NFATC4	no
gene11322	341.685	-0.776312	0.451159	-1.72071	0.0853038	0.209172	238.689	305.283	150.637	333.859	308.381	852.973	265.592	264.405	355.349	RIPK3	no
gene11323	344.289	-0.348056	0.332021	-1.0483	0.294502	0.485903	244.681	374.876	254.267	298.845	387.094	512.441	377.261	210.323	438.815	ADCY4	no
gene11324	193.814	-0.199253	0.595069	-0.334839	0.737746	0.846789	168.78	167.952	192.303	148.201	131.547	582.518	173.037	97.3493	82.6394	LTB4R	no
gene11325	30.9854	1.39907	0.480843	2.90961	0.00361879	0.0212101	63.9167	27.8374	67.3059	26.8716	11.8608	12.0445	33.199	16.8258	19.0071	LTB4R2	no
gene11326	39.0522	-1.06735	0.533553	-2.00046	0.0454511	0.134677	18.9753	25.0536	23.5036	35.8288	29.1129	111.686	37.2231	44.4682	25.6182	CIDEB	no
gene11328	1192.54	1.06532	0.39816	2.6756	0.00745951	0.0365001	2163.18	1393.72	1930.5	769.505	792.519	1639.15	809.853	795.62	438.815	DHRS1	no
gene11329	379.935	0.662128	0.534076	1.23976	0.215063	0.39606	593.227	407.353	509.602	220.673	196.243	855.163	245.471	185.084	206.598	RABGGTA	no
gene1133	1076.14	1.13602	0.300944	3.77486	0.000160097	0.00188153	1802.65	1235.98	2033.07	1143.26	660.971	574.853	854.119	688.656	691.691	LOC101122398	up
gene11330	1449.23	1.09794	0.589944	1.86109	0.0627314	0.169067	2673.52	1724.06	2345.02	996.692	448.555	2926.82	813.877	679.041	435.509	TGM1	no
gene11331	102.691	0.978155	0.298895	3.27257	0.00106573	0.00847905	102.866	195.789	160.252	74.9147	64.6954	84.3118	85.5125	62.4958	93.3825	TINF2	no
gene11332	115.133	1.07875	0.509544	2.11709	0.0342526	0.109893	145.81	189.294	197.644	151.458	73.3214	24.0891	130.784	57.6885	66.1115	GMPR2	no
gene11333	3133.65	-0.697011	0.483271	-1.44228	0.149224	0.30738	3185.85	1584.87	1877.09	2530	3261.73	7926.41	2092.54	3719.7	2024.66	NEDD8	no
gene11334	216.693	-1.23465	0.470399	-2.62469	0.00867277	0.0406361	126.835	113.205	101.493	191.358	225.356	577.043	128.772	307.672	178.501	MDP1	no
gene11335	1679.46	0.547309	0.430596	1.27105	0.203711	0.381068	2409.86	1804.79	2166.61	1289.84	1289.59	3157.86	1137.82	953.062	905.727	TM9SF1	no
gene11337	631.303	1.07672	0.447125	2.40809	0.0160363	0.0639077	892.836	1095.86	927.326	360.731	429.146	1040.21	286.718	296.855	352.044	IPO4	no
gene11338	50.452	-0.356328	0.633617	-0.562371	0.573863	0.733564	30.9596	76.0888	20.2986	36.6431	34.5042	133.585	43.2592	19.2295	59.5003	REC8	no
gene11339	778.766	-0.45678	0.526839	-0.867021	0.38593	0.578977	682.111	669.025	520.285	528.475	488.45	2199.77	604.623	456.7	859.449	IRF9	no
gene1134	75.1192	0.18601	0.686069	0.271124	0.786295	0.875488	106.861	82.5842	55.5541	65.9575	40.9737	224.467	43.2592	19.2295	37.1877	LOC101122645	no
gene11340	559.302	0.214758	0.456745	0.470193	0.638217	0.782318	595.224	651.394	601.48	419.36	456.103	1236.21	362.17	320.892	390.884	RNF31	no
gene11342	539.845	-0.840039	0.691047	-1.2156	0.224136	0.407693	604.212	160.529	295.932	282.559	341.807	2005.96	334.002	533.618	299.981	EMC9	no
gene11343	3170.04	-0.168818	0.452163	-0.373357	0.708883	0.827581	3966.83	2032.13	2784.11	2732.76	2428.23	7186.21	2931.57	2519.06	1949.46	PSME1	no
gene11344	191.617	-0.765033	0.356333	-2.14696	0.0317963	0.104427	187.755	111.349	92.9462	204.387	150.956	331.773	226.357	169.46	249.571	FITM1	no
gene11345	927.124	1.00523	0.202369	4.96731	6.79e-07	2.11e-05	1398.18	1204.43	1576.88	705.176	618.919	836.549	728.365	681.445	594.177	DCAF11	up
gene11346	532.167	0.68614	0.46997	1.45997	0.144299	0.300336	1079.59	410.137	645.282	266.273	249.077	888.012	420.52	444.682	385.926	PCK2	no
gene11347	18.9213	-0.229241	0.42382	-0.540893	0.588581	0.744854	14.9805	16.7024	19.2303	14.6572	11.8608	21.8992	22.1326	24.0369	24.7918	NRL	no
gene11349	19.6984	-1.63968	0.899672	-1.82254	0.0683738	0.180184	7.98959	3.71165	12.8202	4.88574	30.1912	86.5017	8.04823	13.2203	9.91672	CPNE6	no
gene1135	13.8232	-0.290424	0.686511	-0.423044	0.672263	0.804402	10.9857	11.1349	13.8885	13.8429	21.5651	33.9437	4.02412	8.4129	6.61115	LOC101122904	no
gene11350	41.0197	0.986628	0.552657	1.78525	0.0742214	0.190576	76.8998	80.7283	25.6403	21.9858	22.6434	70.0774	20.1206	31.2479	19.8334	LRRC16B	no
gene11351	928.29	0.343747	0.358134	0.959827	0.337142	0.530666	1615.89	669.952	957.239	789.862	901.422	1298.62	784.703	729.519	607.399	LOC101119050	no
gene11354	21.2322	0.296486	0.501611	0.591068	0.554475	0.720448	40.9466	17.6303	13.8885	17.9144	12.9391	17.5193	26.1568	30.0461	14.0487	JPH4	no
gene11355	881.02	0.327757	0.317823	1.03126	0.302421	0.494693	1211.42	885.228	960.444	750.776	631.858	1315.05	909.45	639.38	625.58	AP1G2	no
gene11356	136.808	1.80485	0.266422	6.77438	1.25e-11	1.85e-09	216.718	257.032	309.821	81.4291	89.4953	71.1723	84.5064	51.6793	69.4171	THTPA	up
gene11357	348.481	-0.617174	0.354172	-1.74258	0.0814066	0.202475	293.617	311.778	165.594	497.532	294.364	221.182	474.846	441.076	436.336	ZFHX2	no
gene11358	678.093	-0.903135	0.232924	-3.87738	0.000105589	0.00136367	504.343	375.804	407.04	699.476	784.971	995.318	646.877	925.419	763.588	NGDN	no
gene11359	11.5537	-0.924308	0.594762	-1.55408	0.120165	0.264101	7.98959	8.35121	5.34174	21.9858	7.5478	20.8042	14.0844	9.61474	8.26394	MYH7	no
gene1136	453.929	0.149261	0.615188	0.242626	0.808295	0.889431	630.179	388.795	438.022	291.516	296.521	1292.05	226.357	366.562	155.362	BOLA1	no
gene11360	77.0317	0.853345	0.359456	2.37399	0.017597	0.0685279	138.819	98.3587	91.8779	68.4004	31.2694	83.2169	74.4461	56.4866	50.41	LOC101120580	no
gene11361	21.5275	0.222658	0.662125	0.336278	0.736661	0.846214	18.9753	22.2699	29.9137	16.2858	15.0956	50.3681	17.1025	20.4313	3.30557	CMTM5	no
gene11362	61.4488	0.541833	0.322441	1.68041	0.0928772	0.221166	99.8698	69.5934	63.0325	52.9289	61.4606	45.9883	59.3557	66.1014	34.7085	IL25	no
gene11363	2022.11	0.270747	0.320666	0.844328	0.398486	0.590444	2484.76	2467.32	1895.25	2280.01	1527.89	2830.47	2048.27	1385.73	1279.26	EFS	no
gene11364	587.052	-0.72971	0.55576	-1.313	0.189184	0.362605	440.426	506.64	276.702	526.846	433.459	1799.02	606.635	329.305	364.44	SLC22A17	no
gene11365	3464.11	-0.519536	0.407106	-1.27617	0.201896	0.378552	3441.51	2823.64	1796.96	3378.49	3225.07	7647.19	3182.07	2520.26	3161.78	PABPN1	no
gene11366	1128.6	0.60262	0.183772	3.27917	0.00104114	0.00832445	1381.2	1435.48	1567.27	984.477	959.648	1070.87	1081.48	794.418	882.588	BCL2L2	no
gene11367	194.985	-0.226193	0.265716	-0.851257	0.394626	0.58689	212.723	171.664	141.022	211.716	217.808	152.199	265.592	199.506	182.633	PPP1R3E	no
gene11368	498.518	1.23642	0.256708	4.81644	1.46e-06	3.94e-05	731.047	826.77	868.566	353.402	327.79	460.978	384.303	290.846	242.96	HOMEZ	up
gene11369	142.924	-0.478277	0.361144	-1.32434	0.185391	0.357262	132.827	129.908	76.921	161.23	136.939	78.837	203.218	186.286	180.154	RNF212B	no
gene1137	13.1822	0.114489	0.518998	0.220596	0.825407	0.900852	18.9753	12.0629	10.6835	13.0286	8.62605	21.8992	8.04823	9.61474	15.7015	SV2A	no
gene11371	2149.85	1.0505	0.26985	3.8929	9.91e-05	0.00129339	3277.73	3274.6	3291.58	1705.94	1571.02	2183.35	1068.4	1243.91	1732.12	SLC7A8	up
gene11372	5.98363	-4.62242	1.79053	-2.58159	0.00983455	0.044597	0	0.927912	0	4.88574	0	40.5135	3.01809	1.20184	3.30557	CEBPE	no
gene11373	852.959	-0.133286	0.270555	-0.49264	0.622267	0.769353	1029.66	622.629	751.048	834.648	921.909	1011.74	786.715	1085.26	633.017	C7H14orf119	no
gene11374	5154.93	-0.165118	0.297652	-0.554734	0.579076	0.737838	5048.42	5802.23	3457.17	5298.59	4481.23	8122.4	5102.58	4181.21	4900.51	ACIN1	no
gene11376	450.305	0.807669	0.450147	1.79424	0.0727756	0.187875	637.169	763.672	490.371	359.102	256.625	797.13	277.664	237.965	233.043	CDH24	no
gene11377	1.30869	3.81872	1.71965	2.22064	0.0263754	0.091533	5.99219	3.71165	1.06835	0	0	0	1.00603	0	0	PSMB11	no
gene11379	2969.9	0.237784	0.449441	0.529066	0.59676	0.750211	4216.5	2317.92	3379.18	2242.56	2362.46	5649.99	1964.77	3232.96	1362.72	PSMB5	no
gene1138	915.84	1.07405	0.31162	3.44665	0.000567584	0.00517927	1507.04	1216.49	1503.16	580.589	662.05	1107	652.913	495.159	518.149	SF3B4	up
gene11380	391.247	0.0856247	0.232848	0.367728	0.713076	0.830021	461.399	449.109	309.821	368.059	376.312	314.253	466.797	397.81	377.662	C7H14orf93	no
gene11381	1446.34	1.86856	0.433885	4.30657	1.66e-05	0.000307343	2889.23	2960.04	2561.9	1211.66	607.058	254.03	1054.32	789.611	689.212	AJUBA	up
gene11382	878.603	0.340742	0.318821	1.06875	0.28518	0.475445	1163.48	1000.29	901.685	797.19	682.536	1375.27	714.281	669.427	603.267	HAUS4	no
gene11384	771.132	0.848156	0.481721	1.76068	0.0782927	0.197097	1235.39	1039.26	1012.79	587.103	567.163	1410.31	424.544	301.663	361.96	PRMT5	no
gene11385	1128	0.0949288	0.264011	0.359564	0.719173	0.834166	1175.47	1209.07	1149.54	960.049	860.449	1332.56	1526.15	854.51	1084.23	RBM23	no
gene11386	155.858	-0.631169	0.25836	-2.44298	0.0145664	0.0594782	120.842	132.691	88.6728	179.144	128.313	179.573	180.079	182.68	210.73	REM2	no
gene11387	2951.19	1.55942	0.28407	5.48956	4.03e-08	1.9e-06	6000.18	3984.45	5838.52	1793.88	1772.65	2523.88	1910.45	1443.41	1293.31	LRP10	up
gene11388	1204.02	2.23218	0.357846	6.23783	4.44e-10	4.35e-08	2477.77	2027.49	3096.07	560.232	810.849	327.393	659.955	326.901	549.552	MMP14	up
gene1139	181.28	-0.374004	0.28751	-1.30084	0.193313	0.367866	129.831	165.168	159.184	184.03	178.991	236.511	273.64	143.019	161.147	MTMR11	no
gene11391	527.721	-0.299789	0.378446	-0.792158	0.428269	0.616804	502.345	425.912	443.364	407.145	505.702	1111.38	424.544	492.756	436.336	SLC7A7	no
gene11392	1459.65	0.623968	0.190294	3.27897	0.00104188	0.00832656	1937.47	1689.73	2089.69	1265.41	1348.9	1301.91	1298.78	1233.09	971.839	LOC101105503	no
gene11393	0.902762	-0.693376	1.98594	-0.349142	0.726983	0.839441	0	1.85582	0	0	3.23477	0	1.00603	1.20184	0.826394	LOC105615645	no
gene11394	3.75009	0.0594548	1.08606	0.0547437	0.956343	0.978719	1.9974	8.35121	1.06835	4.88574	2.15651	0	4.02412	9.61474	1.65279	LOC101102398	no
gene11395	0.286744	0.00484522	3.53382	0.0013711	0.998906	0.999356	0	0.927912	0	0	0	0	0	0	1.65279	LOC101102649	no
gene11396	1.02306	-1.92564	1.99635	-0.964583	0.334754	0.528828	0.998698	0	0	0	2.15651	0	4.02412	1.20184	0.826394	LOC101102908	no
gene11397	1.38461	-0.00171024	1.81521	-0.000942172	0.999248	0.999521	0	0.927912	3.20504	2.44287	1.07826	0	0	4.80737	0	LOC105613069	no
gene11398	611.347	0.781112	0.28875	2.70515	0.00682734	0.0341329	887.843	659.745	994.631	392.488	402.19	697.489	522.129	558.857	386.752	ABHD4	no
gene114	107.307	0.271164	0.437519	0.619776	0.535405	0.706316	78.8972	117.845	166.662	134.358	124	143.44	71.4281	85.3309	43.7989	NEU2	no
gene1140	1349.23	0.000886501	0.288931	0.00306821	0.997552	0.999356	1165.48	1516.21	1367.48	1371.27	1366.15	770.851	1411.46	1803.97	1370.16	OTUD7B	no
gene11400	3645.25	-0.801975	0.26094	-3.07341	0.00211625	0.0141973	2783.37	2023.78	2504.21	3856.48	4888.82	4194.79	3423.52	5795.29	3336.98	DAD1	no
gene11401	307.489	-0.960799	0.332901	-2.88614	0.00389996	0.0224346	128.832	243.113	193.371	363.988	283.581	268.265	432.592	539.628	314.03	LOC101110848	no
gene1141	1191.2	-0.587848	0.171059	-3.43651	0.00058925	0.00533057	828.919	882.444	964.718	1271.11	1418.99	1159.56	1382.28	1507.11	1305.7	VPS45	no
gene11419	0.489009	0.903547	3.45157	0.261779	0.793492	0.879742	1.9974	0	0	0	0	0	0	2.40369	0	LOC106991256	no
gene1142	895.976	-0.721738	0.622338	-1.15972	0.246163	0.432722	711.073	513.135	651.692	470.66	870.153	3171	606.635	471.122	598.309	PLEKHO1	no
gene1143	2764.31	0.319908	0.23048	1.388	0.165136	0.329601	3330.66	2661.25	3568.28	2187.18	3045	3188.52	2297.77	2382.05	2218.04	ANP32E	no
gene11430	0.459343	2.91122	3.34756	0.869655	0.384489	0.5774	1.9974	0	2.13669	0	0	0	0	0	0	LOC105613137	no
gene11435	57.8432	2.28735	0.490934	4.65919	3.17e-06	7.58e-05	128.832	120.629	119.655	31.7573	35.5825	36.1336	28.1688	13.2203	6.61115	SALL2	up
gene11436	761.506	-0.358623	0.237777	-1.50824	0.131494	0.28086	596.223	698.718	628.188	973.077	649.11	983.273	845.064	623.757	856.144	METTL3	no
gene11437	1070.38	1.11848	0.21541	5.19235	2.08e-07	7.67e-06	1763.7	1507.86	1742.47	778.462	714.884	1027.07	713.275	729.519	656.156	TOX4	up
gene11439	927.735	-0.516744	0.260204	-1.98592	0.0470426	0.13808	661.138	709.853	791.645	1137.56	1015.72	620.842	1114.68	1132.14	1166.04	RAB2B	no
gene1144	13.7596	-1.11764	0.930139	-1.20158	0.229525	0.413966	10.9857	11.1349	1.06835	28.5002	16.1738	0	13.0784	15.624	27.271	CA14	no
gene11440	1493.96	0.444445	0.223877	1.98522	0.0471203	0.138239	1582.94	1939.34	1921.96	1293.91	1435.16	929.62	1428.56	1477.07	1437.1	CHD8	no
gene11441	2689.87	0.452982	0.193771	2.33772	0.0194019	0.0733374	3104.95	3028.7	3703.96	2794.65	2623.4	2137.36	2493.95	2031.11	2290.76	SUPT16H	no
gene11442	9.73371	-0.706726	0.645939	-1.09411	0.273908	0.463377	3.99479	11.1349	5.34174	4.88574	11.8608	9.85463	9.05426	10.8166	20.6598	RPGRIP1	no
gene11443	4606.3	0.202353	0.212407	0.952665	0.34076	0.53458	5585.72	4675.75	4878.07	4060.05	4584.75	5545.97	3425.53	4231.69	4469.14	HNRNPC	no
gene11444	1.40961	-0.758358	1.84948	-0.410039	0.681777	0.810597	1.9974	0.927912	0	5.70003	3.23477	0	0	0	0.826394	LOC101114196	no
gene11445	10.1268	1.21355	0.780962	1.55392	0.120203	0.264112	22.9701	10.207	16.0252	13.0286	2.15651	0	8.04823	9.61474	9.09033	TMEM253	no
gene11446	691.377	1.11607	0.265763	4.19949	2.68e-05	0.000451137	1250.37	1036.48	949.761	604.204	470.12	651.5	485.912	350.938	423.113	ZNF219	up
gene11447	1092.91	0.234513	0.271205	0.864708	0.387199	0.579857	946.766	1745.4	950.829	1056.95	887.405	1071.96	1066.39	925.419	1185.05	ARHGEF40	no
gene11448	40.1269	-2.12598	0.541214	-3.92818	8.56e-05	0.0011541	7.98959	21.342	7.47843	44.786	81.9475	24.0891	53.3195	80.5235	39.6669	LOC105615652	down
gene11449	133.258	0.0315302	0.564412	0.0558638	0.95545	0.978142	94.8763	156.817	153.842	183.215	58.2259	39.4185	151.91	266.809	94.2089	LOC101110239	no
gene1145	1295.84	1.1336	0.249493	4.54361	5.53e-06	0.000122445	2265.05	1630.34	2205.07	867.219	965.04	746.762	1024.14	1210.26	748.713	APH1A	up
gene11450	77.5954	0.777155	0.514753	1.50976	0.131104	0.280263	98.8711	124.34	99.3563	80.6148	59.3041	10.9496	87.5245	58.8903	78.5074	RNASE13	no
gene11451	55.6492	-0.444554	0.433036	-1.0266	0.30461	0.496992	50.9336	63.098	20.2986	86.3148	45.2868	44.8933	60.3617	81.7253	47.9308	TPPP2	no
gene11452	1311.64	1.5896	0.303632	5.2353	1.65e-07	6.35e-06	2494.75	1967.17	2630.27	893.277	758.014	872.682	1108.64	544.435	535.503	NDRG2	up
gene11453	327.109	0.721732	0.443159	1.62861	0.103396	0.237956	420.452	563.243	347.213	510.56	128.313	167.529	331.99	252.387	222.3	SLC39A2	no
gene11454	359.206	-0.141378	0.19255	-0.734243	0.462801	0.648432	359.531	344.255	304.479	409.588	390.329	395.28	385.309	331.709	312.377	METTL17	no
gene11455	0.671139	-2.45346	2.73671	-0.896502	0.369985	0.563626	0	0	0	0.814291	0	0	4.02412	1.20184	0	RNASE2	no
gene11457	932.673	0.268284	0.345563	0.776367	0.437532	0.625529	768.998	1062.46	1323.68	1018.68	1424.38	693.109	629.774	673.032	799.949	LOC101112822	no
gene11458	3.01522	-1.17472	1.1399	-1.03055	0.302752	0.495143	0.998698	1.85582	2.13669	2.44287	2.15651	0	4.02412	3.60553	9.91672	LOC101113073	no
gene11459	200.577	-2.1817	0.817845	-2.66762	0.00763909	0.0371555	80.8946	56.6026	41.6655	422.617	64.6954	17.5193	160.965	698.271	261.967	LOC101113335	no
gene1146	291.484	-1.5085	0.441178	-3.41926	0.000627908	0.00560092	169.779	99.2866	122.86	216.601	398.955	545.289	197.182	608.133	265.272	C1H1orf54	down
gene11461	13.7812	1.13883	0.648406	1.75636	0.0790271	0.198297	27.9635	21.342	16.0252	26.0573	5.39128	7.66471	7.0422	8.4129	4.13197	LOC101113761	no
gene11462	157.698	-0.641917	0.468418	-1.37039	0.170564	0.336917	91.8802	118.773	133.543	65.9575	150.956	216.802	107.645	306.47	227.258	RNASE6	no
gene11463	48.2285	0.443309	0.515031	0.860742	0.38938	0.581842	78.8972	56.6026	39.5289	19.543	63.6171	33.9437	34.205	82.9272	24.7918	LOC105613768	no
gene11464	2407.64	-0.752464	0.283006	-2.65883	0.00784136	0.0377875	1655.84	1467.96	1835.42	1945.34	2735.54	4230.92	2675.03	2370.03	2752.72	RNASE4	no
gene1147	220.415	0.13642	0.344945	0.395483	0.692486	0.817204	272.645	177.231	254.267	207.644	128.313	192.713	297.785	162.249	290.891	CIART	no
gene1148	2611.96	-0.556679	0.349853	-1.59118	0.111569	0.251203	2159.19	1518.06	2286.26	2461.6	2499.4	4723.65	2121.72	3732.92	2004.83	MRPS21	no
gene11485	6.75937	-1.04797	1.24343	-0.842807	0.399336	0.591045	5.99219	3.71165	2.13669	19.543	3.23477	0	0	20.4313	5.78475	RNASE12	no
gene11488	0.315836	-1.38499	3.14818	-0.439933	0.659986	0.796113	0	0	0	0.814291	0	0	0	1.20184	0.826394	LOC105613766	no
gene11489	6.17478	1.29802	0.658743	1.97044	0.0487875	0.141656	9.98698	12.9908	7.47843	1.62858	5.39128	3.28488	3.01809	6.00922	5.78475	RNASE10	no
gene1149	1318.49	-0.199605	0.285193	-0.699894	0.483993	0.667195	1229.4	1444.76	925.189	1509.69	1120.31	1935.89	1298.78	997.53	1404.87	PRPF3	no
gene11490	703.768	-0.384638	0.538031	-0.7149	0.474671	0.658841	738.038	502.928	512.807	484.503	505.702	2021.29	476.858	693.463	398.322	PNP	no
gene11491	456.886	0.723287	0.204955	3.529	0.000417131	0.00406108	664.134	610.566	585.454	404.702	321.32	312.063	438.629	356.947	418.155	TMEM55B	no
gene11492	1963.67	0.549823	0.387855	1.4176	0.156308	0.316899	2663.53	2189.87	2615.31	1659.52	1771.58	3242.17	1355.12	1129.73	1046.21	APEX1	no
gene11493	716.54	-0.442533	0.324024	-1.36574	0.172021	0.33919	651.151	628.196	455.116	842.791	686.849	1179.27	848.082	459.104	698.303	OSGEP	no
gene11495	98.6248	-0.0467586	0.350728	-0.133319	0.893941	0.94189	79.8959	87.2237	122.86	97.7149	81.9475	132.49	108.651	52.8811	123.959	KLHL33	no
gene11496	42.9555	0.00741279	0.435787	0.0170101	0.986429	0.995284	24.9675	66.8097	37.3922	40.7145	36.6607	21.8992	57.3437	52.8811	47.9308	LOC106991258	no
gene11497	593.149	-0.208205	0.340398	-0.611652	0.540768	0.710488	540.296	553.036	519.217	651.432	481.981	1086.2	541.244	403.819	561.121	LOC101117767	no
gene11498	1163.66	-0.035444	0.366623	-0.096677	0.922983	0.959489	1305.3	978.019	1150.61	1104.99	884.17	2249.05	951.703	906.19	942.915	PARP2	no
gene115	306.928	-0.0767745	0.399271	-0.192287	0.847517	0.91499	302.606	277.446	308.752	482.06	145.565	217.897	461.767	283.635	282.627	NGEF	no
gene1150	1272.73	-0.593673	0.602185	-0.985865	0.3242	0.518011	939.775	1145.97	764.937	1543.08	1643.26	133.585	1714.27	1800.36	1769.31	RPRD2	no
gene11500	6.56759	-1.91029	0.948422	-2.01418	0.0439904	0.131363	1.9974	2.78374	2.13669	12.2144	12.9391	0	10.0603	12.0184	4.95836	CCNB1IP1	no
gene11501	257.891	0.385934	0.27783	1.3891	0.164803	0.329124	339.557	287.653	290.591	311.873	231.825	147.819	269.616	211.524	230.564	TTC5	no
gene11502	1.61272	-2.64643	1.96199	-1.34884	0.177387	0.346767	0.998698	0	0	0.814291	6.46954	0	5.03014	1.20184	0	LOC101118279	no
gene11509	28.2208	-0.592474	0.555867	-1.06586	0.286489	0.477069	13.9818	20.4141	28.8454	13.0286	26.9564	62.4127	18.1085	26.4405	43.7989	LOC101116991	no
gene11510	6.64133	1.71787	0.840009	2.04506	0.0408493	0.124597	15.9792	8.35121	12.8202	4.88574	2.15651	0	1.00603	9.61474	4.95836	LOC105601958	no
gene11512	0.267076	-0.956939	3.53382	-0.270795	0.786549	0.875488	0	0	0	0	0	0	0	2.40369	0	LOC101119313	no
gene11515	1.80569	-3.87618	1.74943	-2.21569	0.026713	0.0923618	0	0	0	0	3.23477	5.47479	1.00603	2.40369	4.13197	LOC101120088	no
gene11517	0.650238	0.0953927	2.31413	0.0412218	0.967119	0.984697	0.998698	0	1.06835	1.62858	2.15651	0	0	0	0	LOC101120583	no
gene1153	898.979	-0.191284	0.483202	-0.395868	0.692202	0.817133	923.796	836.049	704.041	858.262	655.58	2269.85	627.762	531.215	684.254	TARS2	no
gene11532	0.400614	-1.57259	3.52404	-0.446247	0.655419	0.793231	0	0	0	0	0	0	0	3.60553	0	LOC101102066	no
gene1154	1239.77	0.264371	0.364655	0.724989	0.468459	0.653285	1701.78	960.389	1524.53	1126.98	1302.53	1847.2	1160.96	652.601	880.935	ECM1	no
gene11549	0.708296	-2.5115	2.2738	-1.10454	0.26936	0.458257	0	0	0	0	2.15651	2.18992	0	1.20184	0.826394	LOC105613625	no
gene11556	0.223562	-0.956939	3.53382	-0.270795	0.786549	0.875488	0	0	0	0	0	0	2.01206	0	0	LOC101105825	no
gene11562	0.245319	-0.956939	3.53382	-0.270795	0.786549	0.875488	0	0	0	0	0	0	1.00603	1.20184	0	LOC101106852	no
gene1157	1026.31	-0.0973641	0.389192	-0.25017	0.802456	0.885699	897.83	964.101	1080.1	850.934	957.492	1930.41	954.721	511.985	1089.19	ADAMTSL4	no
gene1158	5959	0.42428	0.223299	1.90005	0.0574261	0.158846	6733.22	6315.37	8486.95	5250.55	4774.52	6626.69	5054.29	4341.06	6048.37	MCL1	no
gene11585	761.054	0.70485	0.507685	1.38836	0.165027	0.329423	1232.39	1009.57	833.311	382.717	584.415	1584.41	433.598	372.571	416.502	LPCAT4	no
gene11586	7.11686	-0.276789	0.746288	-0.370887	0.710722	0.828911	6.99089	6.49538	5.34174	8.14291	1.07826	3.28488	9.05426	9.61474	14.0487	NUTM1	no
gene11587	1483.21	-0.387574	0.383236	-1.01132	0.311863	0.504377	1669.82	925.128	1096.12	1352.54	1264.79	3071.36	1302.81	1382.12	1284.22	NOP10	no
gene11588	775.26	-0.39209	0.352063	-1.11369	0.265411	0.454125	422.449	836.977	665.58	936.434	750.467	427.034	940.637	1040.8	956.964	SLC12A6	no
gene1159	2467.23	0.346931	0.342898	1.01176	0.311652	0.504173	3153.89	2413.5	3064.02	2177.41	1949.49	4045.87	1851.09	2011.89	1537.92	ENSA	no
gene11590	936.218	0.0219468	0.22069	0.099446	0.920784	0.958121	1098.57	743.257	995.7	1123.72	889.562	927.43	924.541	955.465	767.72	EMC4	no
gene11591	971.802	-0.983335	0.484486	-2.02964	0.0423927	0.127942	494.356	793.365	477.551	1087.08	1406.05	310.968	929.571	1921.75	1325.54	KATNBL1	no
gene11592	1255.22	0.416531	0.227017	1.8348	0.0665355	0.176533	1664.83	1278.66	1577.95	1143.26	1137.56	1500.09	1028.16	1025.17	941.262	EMC7	no
gene11593	53.8466	-0.981878	0.576966	-1.7018	0.0887936	0.214969	29.9609	53.8189	13.8885	75.729	70.0867	15.3294	84.5064	92.5419	48.7572	CHRM5	no
gene11594	975.789	-0.78722	0.234242	-3.36071	0.000777418	0.00659573	743.031	663.457	566.224	1297.98	1299.3	1290.96	833.998	1049.21	1037.95	AVEN	no
gene11597	1042	-1.63484	0.587743	-2.78157	0.00540973	0.0286337	410.465	486.226	403.835	1819.94	1092.27	147.819	1558.34	1729.45	1729.64	RYR3	no
gene11599	1.37931	-0.762419	1.82974	-0.416682	0.676911	0.80774	0	2.78374	0	0.814291	1.07826	0	0	3.60553	4.13197	LOC101123559	no
gene1160	1359.41	-0.366731	0.306658	-1.1959	0.231736	0.416305	1063.61	1261.03	1093.99	1770.27	1655.12	747.857	1624.74	1666.96	1351.15	GOLPH3L	no
gene11601	4275.08	-0.92599	0.401437	-2.30669	0.0210722	0.0777962	2499.74	2708.57	2807.62	7350.6	7259.9	1930.41	4600.57	5094.61	4223.7	FMN1	no
gene11602	1278.42	-0.147894	0.329205	-0.449246	0.653255	0.791992	831.916	1027.2	1718.97	1024.38	1255.09	947.139	1799.79	1359.28	1542.05	GREM1	no
gene11603	35.3919	-0.609922	0.470663	-1.29588	0.195017	0.369809	14.9805	30.6211	33.1188	57.0003	47.4433	55.8429	32.1929	19.2295	28.0974	SCG5	no
gene11605	410.649	0.380012	0.223592	1.69958	0.0892103	0.215684	408.468	541.901	506.397	438.903	424.833	329.583	315.893	402.617	327.252	ARHGAP11A	no
gene11606	4.07446	-0.876539	1.53853	-0.569726	0.568864	0.730221	4.99349	2.78374	0	1.62858	0	20.8042	0	4.80737	1.65279	GJD2	no
gene11607	75.9574	0.947364	0.687056	1.37887	0.167934	0.33339	161.789	115.989	57.6908	72.4719	38.8172	165.339	18.1085	22.835	30.5766	ACTC1	no
gene11608	1325.22	0.00728059	0.183248	0.0397307	0.968308	0.985512	1139.51	1474.45	1374.96	1407.09	1351.06	1124.52	1286.71	1466.25	1302.4	AQR	no
gene11612	118.434	0.343022	0.387457	0.885316	0.375986	0.569447	119.844	120.629	173.072	95.272	177.912	52.558	102.615	129.799	94.2089	ZNF770	no
gene11614	746.457	-1.07235	0.442245	-2.42479	0.0153171	0.0619411	441.425	411.065	438.022	1035.78	1077.18	252.935	871.221	1350.87	839.616	DPH6	no
gene11623	869.624	-1.21996	0.474744	-2.56973	0.0101777	0.0457791	458.402	604.999	319.436	1230.39	1211.96	321.918	1131.78	1777.53	770.199	C7H15orf41	no
gene11625	893.839	-1.55352	0.479622	-3.23904	0.00119934	0.00926798	413.461	481.586	275.634	1192.94	1416.83	287.974	1432.59	1608.07	935.477	MEIS2	down
gene11629	4.01216	-0.416098	1.00693	-0.413235	0.679434	0.809432	6.99089	1.85582	1.06835	8.14291	6.46954	0	3.01809	3.60553	4.95836	TMCO5A	no
gene1163	6.46425	-2.13099	0.923573	-2.30734	0.021036	0.0776934	0.998698	2.78374	2.13669	3.25716	16.1738	3.28488	16.0965	6.00922	7.43754	HORMAD1	no
gene11631	2275.4	-0.109296	0.403812	-0.27066	0.786653	0.875494	1738.73	2248.33	2498.86	2147.28	2503.71	816.839	2358.13	3309.88	2856.84	SPRED1	no
gene11632	499.56	0.139751	0.276124	0.506117	0.612775	0.761914	645.159	420.344	530.969	409.588	449.633	660.26	422.532	573.279	384.273	FAM98B	no
gene11633	2309.7	-0.519934	0.295802	-1.75771	0.0787975	0.198067	1988.41	1680.45	1705.08	1701.05	2222.29	3504.96	2265.58	3460.11	2259.36	RASGRP1	no
gene11637	2934.24	0.970377	0.629595	1.54127	0.12325	0.268623	1942.47	4309.22	6817.12	2748.23	2032.51	249.651	2679.06	2496.23	3133.68	THBS1	no
gene11638	167.526	-1.23728	0.453476	-2.72844	0.00636338	0.0323414	101.867	116.917	44.8706	182.401	319.164	112.781	132.796	188.689	308.245	FSIP1	no
gene11639	227.024	-1.36857	0.349356	-3.9174	8.95e-05	0.0011969	80.8946	91.8633	159.184	276.044	187.617	241.986	306.839	274.02	424.766	GPR176	down
gene1164	1880.22	-1.03354	0.414117	-2.49577	0.0125685	0.0534375	687.104	880.588	1754.23	1305.31	1844.9	2881.93	1782.68	3535.82	2249.44	CTSS	no
gene11640	1743.62	-0.682648	0.441817	-1.54509	0.122324	0.267318	1255.36	1561.68	910.232	1978.73	2107.99	575.948	2247.47	2299.13	2756.02	EIF2AK4	no
gene11642	3047.62	-0.728064	0.330982	-2.19971	0.0278276	0.0951961	2676.51	1741.69	1941.19	3027.53	3901.13	3200.56	2449.68	5726.78	2763.46	SRP14	no
gene11643	637.09	0.717676	0.317161	2.26282	0.023647	0.0846302	774.99	772.951	1039.5	596.875	448.555	329.583	767.6	588.903	414.85	BMF	no
gene11644	1220.62	-0.234226	0.288941	-0.810635	0.417575	0.607762	1233.39	1096.79	946.556	1425.01	1303.61	730.338	1569.41	1509.51	1171	BUB1B	no
gene11646	882.265	-0.182578	0.290312	-0.628905	0.529412	0.701432	807.947	923.272	697.631	1174.21	669.597	837.643	1139.83	635.775	1054.48	PAK6	no
gene11648	1.5582	3.50116	1.47764	2.36943	0.0178155	0.0690911	1.9974	3.71165	6.41008	0	1.07826	0	0	0	0.826394	ANKRD63	no
gene11649	61.6607	0.154123	0.364996	0.42226	0.672835	0.804665	44.9414	87.2237	66.2375	53.7432	44.2085	74.4572	82.4944	39.6608	61.9795	PLCB2	no
gene11650	204.07	0.474732	0.292054	1.62549	0.104058	0.238958	227.703	244.041	280.975	182.401	142.33	278.12	174.043	170.662	136.355	INAFM2	no
gene11651	70.3844	1.22451	0.379494	3.2267	0.00125226	0.00956865	83.8906	130.836	127.133	43.1574	44.2085	26.279	66.3979	39.6608	71.8962	C7H15orf52	up
gene11653	0.836167	-2.78351	2.58144	-1.07828	0.280909	0.470999	0	0	0	0	0	0	3.01809	1.20184	3.30557	LOC105608915	no
gene11654	2.53617	-2.40843	1.77979	-1.35321	0.175989	0.344603	0.998698	0.927912	0	0	1.07826	15.3294	2.01206	0	2.47918	DISP2	no
gene11655	467.812	0.0912988	0.425803	0.214415	0.830223	0.903257	467.391	493.649	502.123	516.26	309.46	947.139	386.315	302.864	285.106	KNSTRN	no
gene11656	659.614	0.351634	0.50257	0.699672	0.484132	0.667249	664.134	720.06	928.394	719.833	639.406	114.971	799.793	578.086	771.852	IVD	no
gene11657	1043.93	1.24577	0.276465	4.50606	6.6e-06	0.000141077	1663.83	1542.19	1890.97	824.876	601.667	1067.58	611.666	587.701	604.92	BAHD1	up
gene11658	202.883	1.08574	0.362617	2.99417	0.00275195	0.0172988	285.628	309.923	344.008	100.972	174.678	262.79	117.705	115.377	114.869	CHST14	no
gene11659	677.758	0.254285	0.366537	0.693749	0.487839	0.670255	919.801	566.026	792.714	585.475	486.294	1167.23	495.972	617.747	468.565	C7H15orf57	no
gene1166	6588.11	-1.75917	0.37451	-4.69725	2.64e-06	6.51e-05	2061.31	1929.13	3640.93	6377.52	10626.2	5795.62	7570.37	7213.46	14078.4	CTSK	down
gene11660	267.005	-0.13699	0.338556	-0.404629	0.68575	0.813397	253.669	257.032	240.378	255.687	203.79	477.402	274.646	185.084	255.356	RPUSD2	no
gene11662	422.426	0.223144	0.353048	0.632052	0.527353	0.700209	335.563	501.072	564.087	342.816	552.067	300.019	264.586	593.71	347.912	CASC5	no
gene11663	321.143	0.392548	0.247557	1.58569	0.11281	0.253134	351.542	387.867	405.972	349.331	300.834	371.191	253.519	242.772	227.258	RAD51	no
gene11664	1298.8	-0.303202	0.466039	-0.650593	0.515309	0.690475	1812.64	589.224	968.991	1290.65	776.345	793.845	2237.41	1932.56	1287.52	RMDN3	no
gene11665	418.622	0.204145	0.56632	0.360477	0.71849	0.833592	718.064	244.041	414.519	233.701	292.208	844.213	192.152	623.757	204.946	GCHFR	no
gene11666	1127.35	-0.854634	0.474493	-1.80115	0.071679	0.186311	925.793	561.387	710.451	846.048	875.544	3143.63	984.902	1048.01	1050.35	DNAJC17	no
gene11668	361.768	-0.000266757	0.602248	-0.000442936	0.999647	0.999815	376.509	365.597	342.94	309.43	178.991	1059.92	271.628	141.817	209.078	ZFYVE19	no
gene11669	320.188	0.268556	0.279381	0.961254	0.336424	0.530006	421.451	306.211	355.76	376.202	265.251	395.28	298.791	237.965	224.779	PPP1R14D	no
gene1167	697.328	0.417466	0.526298	0.793213	0.427654	0.616018	465.393	1012.35	1035.23	643.29	640.484	132.49	562.37	942.245	842.095	ARNT	no
gene11670	1490.8	1.22921	0.398897	3.08152	0.00205947	0.013911	2894.23	1935.62	2410.19	962.491	834.571	2064	893.354	773.987	648.719	SPINT1	no
gene11671	334.583	1.72958	0.330826	5.22805	1.71e-07	6.57e-06	708.077	492.721	677.332	187.287	132.626	297.829	217.302	165.854	132.223	RHOV	up
gene11672	438.722	1.30135	0.45344	2.86995	0.00410542	0.0233218	798.959	635.62	744.638	184.03	263.095	665.735	272.634	199.506	184.286	VPS18	no
gene11673	221.753	-0.210458	0.374368	-0.562167	0.574002	0.733607	169.779	185.582	246.788	154.715	333.181	344.912	214.284	135.808	210.73	DLL4	no
gene11674	2132.56	2.08247	0.440894	4.7233	2.32e-06	5.85e-05	3547.38	6234.64	3254.19	831.391	649.11	2056.33	1107.64	904.988	607.399	CHAC1	up
gene11675	1484.36	-0.135049	0.190325	-0.709572	0.477969	0.66197	1399.18	1447.54	1332.23	1359.87	1626.01	1604.11	1247.48	1801.56	1541.22	INO80	no
gene11676	29.2403	-1.71444	0.42893	-3.99702	6.41e-05	0.000916414	10.9857	12.0629	11.7518	24.4287	34.5042	29.5639	43.2592	42.0645	54.542	EXD1	down
gene11677	422.242	0.757893	0.548626	1.38144	0.167145	0.332269	308.598	600.359	832.243	409.588	378.468	59.1278	426.556	415.838	369.398	CHP1	no
gene11679	221.346	-0.639364	0.317636	-2.01289	0.0441267	0.131653	191.75	166.096	126.065	243.473	166.052	388.71	228.369	229.552	252.05	OIP5	no
gene1168	815.003	0.0495978	0.265515	0.186798	0.851819	0.91693	699.089	1100.5	701.904	939.691	671.754	675.59	993.957	705.482	847.053	SETDB1	no
gene11680	752.887	0.561133	0.268271	2.09166	0.0364687	0.114988	987.712	957.605	931.599	810.219	596.276	854.068	662.973	448.287	527.239	NUSAP1	no
gene11681	354.973	-0.39948	0.349571	-1.14277	0.253133	0.440955	343.552	281.157	253.198	350.145	290.051	700.774	351.104	328.103	296.675	NDUFAF1	no
gene11683	1997.68	0.554381	0.25776	2.15077	0.0314946	0.103801	3132.92	2118.42	2361.05	1685.58	2013.1	2108.89	1518.1	1227.08	1813.93	RTF1	no
gene11684	33.8212	-0.0360552	0.6602	-0.0546126	0.956447	0.978719	38.9492	44.5398	16.0252	15.4715	16.1738	97.4513	30.1809	21.6332	23.9654	ITPKA	no
gene11685	12.9254	0.0112844	0.814237	0.0138589	0.988943	0.996518	14.9805	19.4862	4.27339	7.32861	9.70431	2.18992	28.1688	25.2387	4.95836	LTK	no
gene11686	592.198	0.700849	0.348598	2.01048	0.0443805	0.132322	771.994	802.644	815.149	522.775	384.938	809.175	502.008	260.8	460.301	RPAP1	no
gene11687	1530.7	1.36525	0.350811	3.89171	9.95e-05	0.00129879	2907.21	2201.94	2646.3	1236.91	598.432	1507.76	1125.75	918.208	633.844	TYRO3	up
gene11689	2280.42	-0.289585	0.278533	-1.03968	0.29849	0.490249	1786.67	2211.21	1960.42	2817.45	2734.46	1374.17	2537.21	2761.84	2340.35	MGA	no
gene1169	2363.62	1.18247	0.215282	5.49268	3.96e-08	1.87e-06	3806.04	3568.75	3933.66	1908.7	1604.45	1992.83	1761.56	1299.19	1397.43	CERS2	up
gene11692	1306.95	0.138834	0.218638	0.634995	0.525432	0.698766	1363.22	1358.46	1455.09	1204.34	958.57	1480.38	1333.99	1104.49	1504.04	MAPKBP1	no
gene11693	340.577	-0.105145	0.616296	-0.170608	0.864532	0.925091	393.487	332.192	246.788	244.287	232.903	1065.39	206.236	193.497	150.404	JMJD7	no
gene11694	1596.81	1.07907	0.462417	2.33353	0.0196203	0.0739269	3249.76	2319.78	1812.99	1644.87	484.137	1979.69	1286.71	918.208	675.163	PLA2G4B	no
gene11695	626.132	-0.428011	0.567659	-0.753993	0.450854	0.638356	707.078	478.803	340.803	627.818	361.216	1855.96	486.918	388.195	388.405	SPTBN5	no
gene11696	1941.24	-0.478499	0.279291	-1.71326	0.086664	0.211515	1162.48	1647.04	1804.44	1602.52	2958.74	2018.01	1941.64	1849.64	2486.62	EHD4	no
gene11697	951.261	-0.410299	0.666697	-0.615421	0.538277	0.708116	697.091	653.25	990.358	1736.07	284.66	151.104	1884.29	1124.93	1039.6	PLA2G4E	no
gene11698	60.3373	-2.79901	1.099	-2.54687	0.0108692	0.0480379	12.9831	14.8466	8.54678	210.901	9.70431	0	69.416	180.276	36.3613	PLA2G4D	no
gene11699	92.9094	-0.101323	0.693491	-0.146106	0.883838	0.937144	87.8854	80.7283	97.2196	175.887	30.1912	16.4244	91.5486	206.717	49.5836	PLA2G4F	no
gene117	2421.01	0.28601	0.359416	0.795762	0.42617	0.614779	2792.36	2731.77	2728.56	2714.03	2509.1	893.486	2094.55	2541.9	2783.29	GIGYF2	no
gene1170	1952.38	1.29151	0.292554	4.41462	1.01e-05	0.000202124	3468.48	2677.95	3523.41	1316.71	998.466	1933.7	1367.19	1377.31	908.206	FAM63A	up
gene11700	1201.16	0.329144	0.303802	1.08342	0.278624	0.468631	1349.24	1340.83	1480.73	1092.78	920.831	1776.02	1041.24	729.519	1079.27	VPS39	no
gene11701	2362.82	-0.493645	0.305914	-1.61367	0.106599	0.243313	1845.59	1795.51	1931.57	2573.16	3061.17	1341.32	2566.38	3412.03	2738.67	TMEM87A	no
gene11702	384.239	-0.700595	0.3776	-1.85539	0.0635409	0.170705	268.65	258.887	286.317	519.517	457.181	159.864	496.978	471.122	539.635	GANC	no
gene11703	34.1673	-2.5253	0.800459	-3.15481	0.001606	0.0115323	2.99609	21.342	0	29.3145	35.5825	32.8488	44.2653	44.4682	96.688	CAPN3	no
gene11704	2295.31	0.268937	0.238043	1.12978	0.258568	0.446529	2194.14	2346.69	3226.41	2475.44	2143.57	1557.03	2250.49	2136.88	2327.12	ZNF106	no
gene11705	1324.68	-0.458895	0.311365	-1.47382	0.14053	0.294737	992.706	1048.54	1138.86	1343.58	1574.25	730.338	1622.72	1860.45	1610.64	SNAP23	no
gene11706	892.091	-0.134243	0.166789	-0.804865	0.420898	0.610346	796.961	814.707	901.685	898.977	851.823	905.531	845.064	955.465	1058.61	LRRC57	no
gene11707	635.074	0.113378	0.291978	0.38831	0.697787	0.820398	494.356	694.078	818.354	705.99	634.015	370.096	691.142	609.334	698.303	HAUS2	no
gene11709	1330.45	-1.37661	0.40302	-3.41574	0.00063608	0.00565624	486.366	957.605	489.303	1736.88	1355.37	739.097	2101.59	1859.25	2248.62	STARD9	down
gene11710	400.605	-0.257048	0.360584	-0.712865	0.47593	0.659832	360.53	445.398	257.472	391.674	285.738	685.444	461.767	272.818	444.6	CDAN1	no
gene11711	822.287	-0.68493	0.444726	-1.54012	0.123532	0.269064	443.422	696.862	615.368	905.491	920.831	274.835	970.818	1368.9	1204.06	TTBK2	no
gene11714	1730.1	-0.862977	0.376288	-2.29339	0.0218254	0.0797809	966.74	1222.06	1168.77	1994.2	2351.68	779.611	1928.56	2640.45	2518.85	UBR1	no
gene11716	1212.87	-0.0179363	0.201882	-0.0888456	0.929205	0.963101	1050.63	1206.29	1352.53	1431.52	1224.9	1055.54	1191.14	1048.01	1355.29	TMEM62	no
gene11717	1252.72	0.130521	0.184168	0.708707	0.478506	0.662352	1461.1	1159.89	1367.48	1328.92	1063.16	1390.6	1168	1185.02	1150.34	CCNDBP1	no
gene11718	63.0333	-0.907287	0.407742	-2.22515	0.026071	0.0908851	38.9492	38.9723	41.6655	82.2433	95.9648	29.5639	97.5848	58.8903	83.4657	EPB42	no
gene11719	405.171	0.461669	0.261756	1.76374	0.0777766	0.196159	463.396	480.658	543.789	461.703	331.025	262.79	290.742	365.36	447.079	LOC101118703	no
gene11724	397.252	-1.66919	0.546244	-3.05576	0.00224487	0.0148737	226.704	180.943	77.9894	705.99	748.31	124.825	712.269	409.828	388.405	MDGA2	no
gene1173	312.548	0.374976	0.341502	1.09802	0.272195	0.46127	266.652	435.191	404.904	372.945	305.147	139.06	291.748	308.874	288.411	PRUNE	no
gene11733	1558.7	-2.11709	0.373223	-5.67245	1.41e-08	7.94e-07	561.268	562.315	325.846	1460.02	3755.57	1598.64	1707.23	2163.32	1894.09	RPS29	down
gene11734	213.428	-0.484755	0.228293	-2.12339	0.033721	0.108678	173.773	187.438	144.227	254.873	186.538	281.404	212.272	243.974	236.349	LRR1	no
gene11735	14708.3	-1.17843	0.516076	-2.28345	0.0224039	0.0812141	11551.9	5514.58	6885.5	11089.8	16336.7	40837.6	8657.89	20925.3	10575.4	RPL36AL	no
gene11736	730.61	0.440736	0.408705	1.07837	0.280867	0.470982	731.047	920.489	1006.38	456.817	590.885	1338.04	427.562	624.958	479.308	MGAT2	no
gene11737	421.801	0.327177	0.293502	1.11474	0.264964	0.453647	479.375	383.228	600.411	378.645	378.468	534.34	309.857	456.7	275.189	DNAAF2	no
gene11738	559.463	-0.621952	0.248839	-2.49941	0.0124399	0.0530262	448.415	411.065	374.99	584.661	803.301	437.984	640.84	733.124	600.788	POLE2	no
gene11739	550.523	-0.494017	0.312904	-1.57881	0.114379	0.255555	358.533	577.161	362.17	591.989	595.198	361.336	612.672	806.437	689.212	KLHDC1	no
gene1174	1177.3	0.304943	0.317556	0.96028	0.336914	0.530401	1458.1	1307.43	1280.95	1535.75	681.458	846.403	1430.57	874.942	1180.09	BNIPL	no
gene11740	2407.28	-0.350954	0.24657	-1.42334	0.154637	0.314728	2196.14	2084.09	1821.53	3433.05	2450.88	1818.73	2596.56	2866.4	2398.19	KLHDC2	no
gene11741	2989.95	-0.785019	0.474735	-1.65359	0.0982103	0.229506	2564.66	1909.64	1577.95	3866.25	4375.57	792.75	3596.55	3992.52	4233.61	NEMF	no
gene11742	1457.49	1.41315	0.348822	4.05121	5.1e-05	0.000769405	2321.97	2180.59	2988.17	675.861	1046.99	1620.54	814.883	832.877	635.497	ARF6	up
gene11745	951.97	-0.977815	0.31448	-3.10931	0.00187526	0.0129777	596.223	745.113	393.152	1260.52	1120.31	669.02	1118.7	1329.24	1335.45	VCPKMT	no
gene11746	1151.38	-0.418573	0.238211	-1.75715	0.0788922	0.198213	797.96	1040.19	982.88	1304.49	1248.62	877.062	1215.28	1545.57	1350.33	SOS2	no
gene11747	527.256	-0.537021	0.344507	-1.55881	0.119042	0.262377	436.431	382.3	397.425	637.589	636.171	258.41	571.424	801.629	623.927	L2HGDH	no
gene11748	626.188	-0.380004	0.330525	-1.1497	0.250268	0.437696	589.232	356.318	618.573	485.317	678.223	550.764	615.69	1080.46	661.115	ATP5S	no
gene11749	177.642	-0.649799	0.331266	-1.96156	0.0498134	0.143742	90.8815	142.898	152.774	218.23	228.59	105.116	222.332	211.524	226.432	CDKL1	no
gene1175	27.3535	-0.19893	0.550154	-0.36159	0.717658	0.833171	44.9414	13.9187	16.0252	46.4146	16.1738	25.1841	43.2592	20.4313	19.8334	C1H1orf56	no
gene11750	1735.67	-0.431277	0.322484	-1.33736	0.181106	0.351753	1206.43	1617.35	1401.67	1864.73	2110.15	951.519	1743.45	2421.71	2303.99	MAP4K5	no
gene11751	274.473	-0.673636	0.489558	-1.37601	0.168819	0.33466	177.768	223.627	188.029	289.073	405.424	74.4572	257.543	504.774	349.564	ATL1	no
gene11752	851.387	-0.122477	0.304576	-0.402124	0.687593	0.814181	584.238	792.437	1035.23	664.461	1040.52	596.753	988.926	877.345	1082.58	SAV1	no
gene11753	2378.2	-0.310679	0.359397	-0.864443	0.387344	0.579922	1574.95	2181.52	2393.1	2422.51	2738.77	1077.44	2913.46	3171.66	2930.39	NIN	no
gene11755	513.854	-0.316963	0.450383	-0.703765	0.481579	0.664972	456.405	448.181	419.861	488.574	565.006	1201.17	342.05	296.855	406.586	ABHD12B	no
gene11756	1454.09	0.705925	0.23563	2.9959	0.00273638	0.0172498	1371.21	2168.53	2339.68	1393.25	1114.92	1171.61	1153.92	1096.08	1277.6	PYGL	no
gene11758	423.243	-0.788381	0.429749	-1.83452	0.0665774	0.176592	247.677	332.192	275.634	758.919	351.512	216.802	384.303	444.682	797.47	TRIM9	no
gene1176	3049.66	0.699574	0.237849	2.94125	0.00326887	0.0196627	3653.24	3921.36	4725.3	2653.77	2058.39	3322.1	2761.55	2135.68	2215.56	CDC42SE1	no
gene11761	1813.74	-0.254422	0.255699	-0.995004	0.319734	0.513332	1688.8	1398.36	1733.93	1533.31	1652.97	2746.16	1665.98	2056.35	1847.82	TMX1	no
gene11763	6367.41	-1.24792	0.633685	-1.96931	0.0489179	0.14183	2924.19	4478.1	2564.03	8670.57	11345.4	639.456	7548.24	10816.6	8320.13	FRMD6	no
gene11765	4814.63	-0.790392	0.383611	-2.0604	0.0393603	0.121242	4200.52	2613	2903.77	3856.48	5381.58	9925.8	3749.47	6629.37	4071.64	C7H14orf166	no
gene11766	1068.34	-0.117047	0.370355	-0.31604	0.751972	0.856645	636.171	1195.15	1202.96	881.877	1434.08	603.322	1152.91	956.667	1551.97	NID2	no
gene11768	73.4371	0.912852	0.610596	1.49502	0.13491	0.286494	109.857	68.6655	142.09	63.5147	25.8782	9.85463	105.633	81.7253	53.7156	PTGDR	no
gene11769	175.027	-0.159152	0.572964	-0.277769	0.78119	0.875488	182.762	120.629	183.756	112.372	174.678	476.307	99.5969	67.3032	157.841	LOC105607710	no
gene11770	155.913	0.836484	0.397389	2.10495	0.0352956	0.112266	124.837	217.131	320.504	97.7149	120.765	99.6413	132.796	86.5327	203.293	PLEKHO2	no
gene11771	55.5003	-0.691974	0.555245	-1.24625	0.212673	0.393277	53.9297	43.6119	20.2986	48.0431	48.5215	156.579	48.2894	37.2571	42.9725	PIF1	no
gene11774	263.31	-0.293861	0.297108	-0.98907	0.322629	0.516542	222.71	251.464	212.601	342.002	277.112	283.594	370.219	164.652	245.439	RBPMS2	no
gene11775	2363.92	0.542791	0.289626	1.87411	0.0609156	0.165936	3360.62	2588.87	3015.94	1744.21	1979.68	3212.61	1865.18	2021.5	1486.68	OAZ2	no
gene11776	5481.14	-0.794025	0.517384	-1.53469	0.12486	0.270993	3791.06	3914.86	3335.38	7112.01	6329.37	1075.25	6786.67	8539.09	8446.57	ZNF609	no
gene11778	1155.01	-0.563442	0.189602	-2.97171	0.00296147	0.018273	852.888	964.101	810.876	1343.58	1433	1030.36	1225.34	1342.46	1392.47	TRIP4	no
gene11779	726.411	-0.159099	0.359167	-0.442967	0.65779	0.794629	752.02	661.601	607.89	537.432	1001.7	1008.46	413.478	978.3	576.823	KIAA0101	no
gene11781	1307.63	-1.50527	0.501853	-2.99943	0.00270486	0.0170936	556.275	848.112	357.896	2088.66	1633.56	381.046	1789.73	2051.55	2061.85	CSNK1G1	no
gene11782	6448.71	0.079246	0.513581	0.154301	0.877373	0.933236	8658.71	4888.24	6513.71	4304.34	6735.87	15348	3779.65	4604.26	3205.58	PPIB	no
gene11783	22.2733	-0.233237	0.562032	-0.414988	0.678151	0.808499	17.9766	27.8374	13.8885	13.0286	19.4086	44.8933	11.0663	16.8258	35.5349	SNX22	no
gene11784	1686.3	0.667877	0.297228	2.24702	0.0246388	0.0871063	2056.32	2160.18	2502.07	1173.39	1410.36	2269.85	1206.23	1037.19	1361.07	SNX1	no
gene11785	1004.19	-0.990311	0.235864	-4.19866	2.68e-05	0.000452372	768.998	535.405	512.807	1234.46	1257.25	1480.38	985.908	1097.28	1165.21	FAM96A	no
gene11786	447.781	-0.322083	0.620723	-0.518885	0.603841	0.755248	323.578	552.108	275.634	595.246	583.337	42.7034	555.328	575.683	526.413	DAPK2	no
gene11787	2740.24	-0.0461256	0.377601	-0.122154	0.902777	0.946817	2318.98	2886.73	2840.74	2950.17	3377.1	1019.41	2839.01	3531.01	2898.99	HERC1	no
gene11789	73.5333	-0.694406	0.656452	-1.05782	0.290139	0.480935	56.9258	43.6119	55.5541	48.0431	102.434	231.036	67.4039	33.6516	23.139	FBXL22	no
gene1179	250.244	0.585613	0.470206	1.24544	0.21297	0.393657	249.675	288.581	427.339	222.301	208.104	58.0328	339.032	260.8	198.334	GABPB2	no
gene11790	4931.28	-0.906704	0.374747	-2.41951	0.0155416	0.0625396	3260.75	3399.87	2683.69	6244.79	6843.69	2240.29	5948.65	8013.89	5745.91	USP3	no
gene11791	1694.19	-0.781732	0.585937	-1.33416	0.182152	0.353146	1470.08	856.463	1108.94	2470.56	1420.06	251.841	2778.65	2813.51	2077.55	CA12	no
gene11792	317.931	-0.15068	0.347049	-0.434175	0.664162	0.798631	220.712	308.995	358.965	300.473	273.877	171.909	411.466	429.058	385.926	APH1B	no
gene11794	1747.6	-0.594372	0.319867	-1.85818	0.0631428	0.169892	991.707	1381.66	1539.49	1867.17	1934.39	1223.07	1598.58	2904.85	2287.46	RAB8B	no
gene11797	2681.02	-0.728507	0.335563	-2.171	0.0299311	0.100052	2553.67	1383.52	1655.94	2243.37	2697.8	4045.87	2350.08	4426.39	2772.55	RPS27L	no
gene11798	615.101	-0.184356	0.236757	-0.77867	0.436174	0.624241	639.167	415.705	636.735	636.775	552.067	673.4	623.738	784.803	573.517	LACTB	no
gene11800	15343	0.190801	0.236215	0.807743	0.419239	0.609384	15032.4	17859.5	17280.5	16490.2	11414.4	19144.3	14958.6	13949.8	11957.1	TPM1	no
gene11802	1719.38	-0.393848	0.347338	-1.1339	0.256835	0.445137	1119.54	1965.32	1180.52	2204.28	2421.76	976.703	1587.51	2052.75	1965.99	TLN2	no
gene11805	47.7624	-0.135183	0.63023	-0.214498	0.830159	0.903257	41.9453	38.9723	53.4174	30.943	21.5651	12.0445	81.4883	108.166	41.3197	C2CD4B	no
gene11807	4.57933	-0.842243	1.20006	-0.701834	0.482783	0.666039	2.99609	3.71165	2.13669	0.814291	5.39128	13.1395	1.00603	12.0184	0	LOC101102735	no
gene11808	1316.02	-0.452559	0.320156	-1.41356	0.157491	0.318607	814.938	1073.59	1280.95	1176.65	1661.59	844.213	1343.05	1938.57	1710.63	VPS13C	no
gene11809	14097.2	-1.97164	0.650394	-3.03145	0.00243383	0.0158547	5863.36	4550.48	3931.52	24199.1	14824.9	1355.56	23010.9	29695.1	19443.4	RORA	no
gene1181	91.3772	0.645751	0.516283	1.25077	0.211019	0.391115	122.84	101.142	136.748	65.9575	64.6954	189.428	58.3497	46.8719	36.3613	SEMA6C	no
gene11810	861.243	-1.15876	0.489958	-2.36501	0.0180297	0.0695721	489.362	448.181	480.756	1043.11	1104.13	216.802	1087.52	1509.51	1371.81	ICE2	no
gene11812	25161.2	0.261859	0.459892	0.569392	0.56909	0.730221	31748.6	24176.7	28950.1	19131.8	19429.1	55329.4	17586.4	14868	15230.4	ANXA2	no
gene11816	914.983	-0.348996	0.314484	-1.10974	0.26711	0.455863	641.164	748.825	931.599	879.434	1136.48	533.245	952.709	1171.8	1239.59	BNIP2	no
gene11818	1328.28	-0.722329	0.282045	-2.56104	0.010436	0.0467395	1113.55	706.141	960.444	1215.74	1593.66	1388.41	1241.44	2216.2	1518.91	GTF2A2	no
gene11819	13.8208	-0.370443	0.814163	-0.454998	0.64911	0.78865	15.9792	11.1349	7.47843	8.9572	0	27.374	12.0723	24.0369	17.3543	GCNT3	no
gene1182	60.5104	0.00610439	0.520018	0.0117388	0.990634	0.997374	49.9349	45.4677	86.5361	35.8288	46.365	145.63	43.2592	44.4682	47.1044	TNFAIP8L2	no
gene11820	313.789	0.236416	0.516331	0.457877	0.647041	0.787159	364.525	296.932	385.673	361.545	171.443	65.6975	446.677	347.333	384.273	FAM81A	no
gene11821	4443.13	-0.68773	0.428763	-1.60399	0.108717	0.246533	3230.79	3434.2	2807.62	5993.99	5093.68	1428.92	5451.67	5941.91	6605.36	MYO1E	no
gene11822	241.545	0.665846	0.390168	1.70656	0.0879036	0.213372	361.529	315.49	284.18	188.915	228.59	373.381	141.85	163.451	116.521	CCNB2	no
gene11823	1041.75	-0.18204	0.293006	-0.621285	0.534412	0.705321	766.002	1096.79	1005.31	1079.75	1064.24	743.477	821.926	1418.17	1380.08	RNF111	no
gene11824	4486.26	-0.506093	0.390121	-1.29727	0.194538	0.36932	4376.3	3375.74	2761.68	6296.91	5722.31	1822.01	4868.17	5270.08	5883.1	SLTM	no
gene11825	1441.71	-0.572988	0.408931	-1.40118	0.161159	0.324143	1032.65	1011.42	1220.05	1543.89	1898.81	523.39	1648.88	2253.46	1842.86	FAM63B	no
gene11826	2873.2	-0.432366	0.335353	-1.28928	0.197299	0.372648	1940.47	2283.59	2767.02	3472.95	3612.16	1494.62	2845.05	4077.85	3365.07	ADAM10	no
gene11827	436.115	-1.70317	0.365472	-4.66019	3.16e-06	7.55e-05	159.792	275.59	86.5361	511.374	662.05	425.939	573.437	676.638	553.684	LIPC	down
gene11829	809.687	1.18724	0.630003	1.8845	0.0594976	0.162823	1301.3	1132.98	1445.47	788.233	371.999	54.7479	587.521	1023.97	580.955	AQP9	no
gene1183	162.061	0.036182	0.376025	0.0962224	0.923344	0.959528	181.763	151.25	161.32	162.858	109.982	295.639	158.953	104.56	132.223	LYSMD1	no
gene11830	68.4993	0.243873	0.395952	0.615916	0.53795	0.70799	66.9128	64.0259	98.288	68.4004	60.3824	29.5639	75.4522	99.753	53.7156	ALDH1A2	no
gene11832	664.605	0.70966	0.327997	2.16362	0.0304938	0.101539	918.802	721.916	1050.19	528.475	421.598	917.575	534.201	384.59	504.1	POLR2M	no
gene11833	2623.29	-0.396707	0.4874	-0.813925	0.415688	0.606141	2014.37	2007.07	2477.5	3694.44	1905.28	689.824	3794.74	3027.44	3998.92	MYZAP	no
gene11834	2724.92	0.432491	0.255918	1.68996	0.0910358	0.218255	3146.9	3101.08	3633.45	1981.17	2840.13	1793.54	2454.71	2285.91	3287.39	CGNL1	no
gene11835	7819.15	-1.11107	0.606214	-1.8328	0.0668325	0.177057	4129.62	5020	4077.88	10000.3	10229.4	1018.31	9120.66	17965.1	8811.01	TCF12	no
gene11836	2009.18	-0.805359	0.476957	-1.68854	0.0913085	0.218665	1382.2	1316.71	1323.68	1736.07	2738.77	601.132	2310.85	3904.79	2768.42	ZNF280D	no
gene11837	283.606	-0.196593	0.610165	-0.322196	0.747304	0.853578	382.501	249.608	143.159	228.816	410.816	37.2286	293.76	433.865	372.703	MNS1	no
gene11840	774.506	-0.908419	0.373344	-2.43319	0.0149663	0.060734	584.238	484.37	397.425	576.518	1133.25	485.067	878.263	1323.23	1108.19	TEX9	no
gene11842	2072.46	-0.774517	0.487624	-1.58835	0.112207	0.25232	1333.26	1554.25	1331.16	2568.27	2768.96	521.2	2326.94	3837.48	2410.59	RFX7	no
gene11844	2297.24	-0.85602	0.222719	-3.8435	0.000121291	0.00151682	1426.14	1382.59	1666.62	2294.67	3268.2	2360.73	2348.07	2617.61	3310.53	NEDD4	no
gene11845	28.3513	-0.644338	0.484065	-1.3311	0.183156	0.354326	14.9805	22.2699	24.572	27.6859	36.6607	12.0445	25.1507	50.4774	41.3197	PRTG	no
gene11846	425.354	-0.225601	0.414571	-0.544181	0.586317	0.74335	344.551	356.318	445.501	390.859	395.72	220.087	476.858	867.731	330.557	PYGO1	no
gene11847	814.509	-1.11526	0.307948	-3.62159	0.000292801	0.00307645	588.233	380.444	405.972	1196.19	994.153	631.791	870.215	1365.29	898.29	DYX1C1	down
gene11849	41.032	-0.566509	0.469868	-1.20568	0.227942	0.412367	27.9635	28.7653	36.3238	39.0859	38.8172	24.0891	32.1929	94.9456	47.1044	C7H15orf65	no
gene1185	108.829	-0.836472	0.447306	-1.87002	0.0614807	0.166658	73.9037	104.854	35.2555	118.072	77.6345	200.377	169.013	80.5235	119.827	TMOD4	no
gene11850	4319.56	-0.37594	0.413713	-0.908698	0.36351	0.556771	3696.18	2785.59	4331.08	4351.57	5768.67	1662.15	4163.95	6976.7	5140.17	CCPG1	no
gene11851	588.024	-0.912911	0.575834	-1.58537	0.112882	0.253164	357.534	461.172	291.659	626.189	1024.34	89.7866	712.269	1011.95	717.31	PIGB	no
gene11852	245.042	-0.200616	0.361453	-0.555027	0.578876	0.737794	225.706	173.52	269.224	168.558	237.216	455.503	203.218	245.176	227.258	LOC105610830	no
gene11853	1395.25	-0.400365	0.540745	-0.740395	0.459061	0.645754	1458.1	695.006	1296.97	1297.98	887.405	401.85	1940.63	2939.71	1639.56	RAB27A	no
gene11854	1376.44	0.0972401	0.215069	0.452135	0.651172	0.790073	1513.03	1390.94	1412.36	1172.58	1282.05	1659.96	1071.42	1568.41	1317.27	RSL24D1	no
gene11855	13.661	0.954944	0.737954	1.29404	0.195651	0.370479	11.9844	23.1978	25.6403	13.8429	14.0173	0	8.04823	7.21106	19.0071	LOC101105256	no
gene11857	238.56	-1.75583	0.3887	-4.51719	6.27e-06	0.000135376	105.862	115.061	55.5541	331.416	305.147	278.12	192.152	521.6	242.133	UNC13C	down
gene11859	35.6253	-0.547673	0.433494	-1.26339	0.206448	0.384449	19.974	36.1886	25.6403	43.9717	44.2085	19.7093	28.1688	43.2663	59.5003	WDR72	no
gene1186	804.396	0.2231	0.377768	0.590572	0.554807	0.720722	1017.67	828.625	821.559	701.104	619.998	1495.71	635.81	521.6	597.483	VPS72	no
gene11864	4.71992	-2.30728	1.0711	-2.15413	0.0312299	0.103251	0.998698	2.78374	0	5.70003	2.15651	10.9496	2.01206	9.61474	8.26394	ONECUT1	no
gene11865	4719.08	-0.381712	0.449808	-0.848611	0.396098	0.588317	3185.85	4170.96	4421.89	4914.24	5760.05	1577.84	4278.64	8815.52	5346.77	FAM214A	no
gene11866	509.701	-0.651834	0.253612	-2.57021	0.0101638	0.0457279	284.629	401.786	420.929	571.632	541.285	431.414	600.599	749.95	585.087	ARPP19	no
gene11867	2004.97	-0.167592	0.250973	-0.667768	0.504282	0.682652	1427.14	1841.91	2289.47	2114.71	2202.88	1860.33	1553.31	2541.9	2213.08	MYO5A	no
gene11868	656.458	-0.160557	0.372225	-0.431344	0.666218	0.800129	534.304	704.285	587.591	641.661	958.57	312.063	538.225	680.243	951.179	MYO5C	no
gene11869	211.066	-0.342179	0.202569	-1.6892	0.0911815	0.218486	169.779	183.727	183.756	189.73	225.356	245.271	255.531	204.313	242.133	GNB5	no
gene11870	7.65939	0.342062	0.704183	0.485757	0.627139	0.77318	9.98698	9.27912	7.47843	6.51432	16.1738	7.66471	4.02412	1.20184	6.61115	BCL2L10	no
gene11873	3876.27	-0.152879	0.3225	-0.474044	0.635468	0.780512	3048.03	3473.17	4301.17	3645.58	5437.65	2106.7	3725.33	4649.93	4498.89	MAPK6	no
gene11874	801.343	-0.260587	0.455128	-0.572557	0.566944	0.728706	631.177	720.06	772.415	753.219	724.588	1919.46	598.587	444.682	647.893	LEO1	no
gene11875	176.726	-1.30076	0.335078	-3.88195	0.000103621	0.00134314	98.8711	81.6563	87.6045	115.629	209.182	315.348	215.29	248.782	218.168	LOC105607297	down
gene11876	4869.23	-0.111256	0.307773	-0.361487	0.717735	0.833206	3279.72	4620.07	5966.72	4977.76	6089.99	3303.49	4332.97	6624.56	4627.8	TMOD3	no
gene11877	501.743	-0.781437	0.428463	-1.82382	0.06818	0.179834	172.775	309.923	535.242	490.203	773.11	355.862	607.641	409.828	861.102	TMOD2	no
gene11878	92.3285	-0.587616	0.36114	-1.62711	0.103713	0.23838	52.931	93.7191	60.8958	109.115	129.391	70.0774	117.705	64.8995	132.223	LYSMD2	no
gene11879	30.2108	-1.24889	0.614079	-2.03377	0.0419748	0.127048	11.9844	12.9908	22.4353	21.1716	59.3041	31.7538	11.0663	27.6424	73.549	SCG3	no
gene1188	1534.96	-0.0756091	0.375039	-0.201603	0.840227	0.910176	1086.58	1720.35	1638.84	1883.45	1559.16	646.026	1677.05	1497.5	2105.65	PIP5K1A	no
gene11880	328.91	-0.770088	0.578302	-1.33164	0.18298	0.354115	117.846	311.778	241.447	402.26	639.406	65.6975	280.682	490.352	410.718	DMXL2	no
gene11882	254.655	0.269616	0.536339	0.502697	0.615177	0.763244	152.801	387.867	321.573	453.56	333.181	78.837	145.874	169.46	248.744	GLDN	no
gene11885	3.86347	0.0679852	0.771411	0.0881311	0.929773	0.963205	4.99349	3.71165	3.20504	4.88574	4.31303	4.37984	4.02412	3.60553	1.65279	CYP19	no
gene11888	1943.11	-0.638103	0.470192	-1.35711	0.174746	0.343039	1607.9	1255.46	1388.85	1866.35	1627.09	5288.65	1431.58	1396.54	1625.52	TNFAIP8L3	no
gene11889	951.196	-0.494576	0.301996	-1.63769	0.101486	0.234753	670.126	696.862	874.977	727.976	1128.93	1544.99	822.932	1213.86	880.109	AP4E1	no
gene1189	3789.6	0.212511	0.748366	0.283966	0.776436	0.872995	5514.81	3059.33	3936.86	1903	2208.27	13341	1546.27	1527.54	1069.35	PSMD4	no
gene11890	2765.4	-0.170452	0.324234	-0.525707	0.599092	0.751926	1750.72	2487.73	3417.64	2459.16	2904.82	1906.32	2594.55	4093.48	3274.17	SPPL2A	no
gene11891	1092.27	-0.248441	0.598078	-0.4154	0.677849	0.808303	587.235	1037.41	1287.36	1046.36	1342.43	147.819	990.939	1952.99	1437.92	TRPM7	no
gene11892	275.394	-1.3594	0.404514	-3.36057	0.000777816	0.00659573	127.833	193.934	82.2628	378.645	309.46	156.579	342.05	413.434	474.35	USP50	down
gene11894	2727.18	0.155167	0.296068	0.524093	0.600214	0.752768	3184.85	2342.05	3252.05	3150.49	2978.14	1486.95	2858.13	2311.14	2980.8	USP8	no
gene11896	1147.29	-0.320962	0.234538	-1.36849	0.171159	0.337832	902.823	1119.06	929.462	1240.98	1437.32	840.928	1269.61	1379.72	1205.71	GABPB1	no
gene11897	45.9476	-1.78732	0.450807	-3.96471	7.35e-05	0.0010164	19.974	19.4862	12.8202	48.0431	37.739	93.0715	56.3376	38.459	87.5977	HDC	down
gene11898	7.33486	1.32455	0.652939	2.0286	0.0424996	0.128177	10.9857	7.4233	18.1619	1.62858	3.23477	6.56975	7.0422	6.00922	4.95836	SLC27A2	no
gene11899	837.752	-1.83657	0.489903	-3.74884	0.000177657	0.00204064	221.711	423.128	280.975	1132.68	1781.28	275.93	1114.68	1025.17	1284.22	ATP8B4	down
gene11902	505.139	-0.734007	0.292449	-2.50986	0.0120779	0.0518817	368.52	359.102	322.641	402.26	683.615	788.37	432.592	685.051	504.1	DTWD1	no
gene11903	219.51	-1.18822	0.531708	-2.23472	0.0254359	0.0893552	101.867	139.187	114.313	165.301	403.268	59.1278	247.483	419.443	325.599	FAM227B	no
gene11905	596.209	-1.20526	0.236407	-5.09823	3.43e-07	1.17e-05	305.602	317.346	333.324	733.676	827.023	500.396	688.124	862.923	797.47	GALK2	down
gene11906	3273.7	-0.239899	0.326281	-0.735253	0.462185	0.647777	2628.57	2875.6	3259.53	2671.69	3894.66	2223.86	3076.44	5641.45	3191.53	COPS2	no
gene11908	4961.09	-0.229086	0.534118	-0.428906	0.667992	0.80114	4389.28	3191.09	5771.21	4424.04	4185.79	1007.36	7168.96	8043.94	6468.18	SECISBP2L	no
gene11909	183.401	-0.335748	0.334135	-1.00483	0.31498	0.507839	130.829	178.159	159.184	162.044	214.573	102.926	238.429	262.002	202.466	SHC4	no
gene11911	386.011	-0.371635	0.387898	-0.958073	0.338026	0.531727	284.629	352.607	331.188	446.231	542.363	146.724	428.568	469.921	471.871	CEP152	no
gene11912	6358.99	-0.702981	0.327466	-2.14673	0.0318148	0.104449	3012.07	5391.17	5044.74	5672.35	8993.74	9053.12	7242.4	4425.19	8396.16	FBN1	no
gene11914	8.12156	-3.56267	1.22069	-2.91857	0.00351643	0.0207851	0.998698	0.927912	1.06835	17.9144	16.1738	0	6.03617	6.00922	23.9654	SLC12A1	no
gene11916	256.276	0.23437	0.604798	0.387518	0.698373	0.82087	231.698	270.95	351.486	208.458	324.555	26.279	229.375	418.241	245.439	MYEF2	no
gene11917	835.252	-0.130457	0.253219	-0.515196	0.606416	0.757319	654.147	776.662	926.257	657.947	830.258	783.99	758.546	1031.18	1098.28	SLC24A5	no
gene11918	603.103	-1.17568	0.47778	-2.46071	0.0138661	0.0575583	232.697	360.03	391.015	745.076	616.763	187.238	924.541	1038.39	932.172	SEMA6D	no
gene1192	398.243	1.44528	0.25674	5.62936	1.81e-08	9.7e-07	666.132	707.069	693.357	241.844	256.625	351.482	256.537	170.662	240.481	ZNF687	up
gene11922	3.20256	0.344682	1.04891	0.32861	0.742451	0.850318	2.99609	0.927912	7.47843	4.88574	2.15651	2.18992	0	2.40369	5.78475	LOC101113241	no
gene11923	1071.52	-0.649049	0.358976	-1.80806	0.0705976	0.184472	766.002	952.966	612.163	1012.98	1089.04	2257.81	1038.22	941.043	973.492	SQRDL	no
gene11925	1878.8	-0.375242	0.246748	-1.52075	0.128323	0.276046	1478.07	1453.11	1773.46	1850.88	1869.7	1655.58	1736.41	2821.93	2270.1	BLOC1S6	no
gene11927	574.477	0.0185661	0.280034	0.0662996	0.947139	0.973395	365.524	663.457	709.383	542.318	715.962	478.497	573.437	516.793	604.92	SLC30A4	no
gene11929	149.587	-2.19956	0.521146	-4.22063	2.44e-05	0.000415984	46.9388	29.6932	55.5541	174.258	112.139	296.734	232.393	334.112	64.4587	C7H15orf48	down
gene1193	1585.97	0.314892	0.344517	0.91401	0.360711	0.554446	1933.48	1861.39	1678.37	1391.62	1013.56	2621.33	1496.97	1096.08	1180.92	PI4KB	no
gene11930	331.815	-0.165545	0.333468	-0.496434	0.619588	0.767323	295.615	317.346	307.684	346.888	329.947	596.753	239.435	269.213	283.453	SPATA5L1	no
gene11931	2555.71	1.02583	0.330657	3.1024	0.00191959	0.0131917	3008.08	3648.55	4947.52	2560.94	1591.51	1050.07	1891.33	2342.39	1961.03	GATM	no
gene11933	3.5635	-3.86691	1.36712	-2.8285	0.00467672	0.0257568	0	0.927912	0	4.88574	6.46954	6.56975	5.03014	2.40369	5.78475	SLC28A2	no
gene11936	1459.7	0.507588	0.295058	1.7203	0.0853782	0.209326	2416.85	1498.58	1542.69	1337.07	1018.95	1841.72	1189.13	1306.4	985.887	SHF	no
gene11937	601.208	-0.0842477	0.705939	-0.119341	0.905005	0.948146	594.225	550.252	589.728	910.377	266.329	42.7034	1203.21	749.95	504.1	DUOX1	no
gene11938	321.678	0.697511	0.519181	1.34348	0.179116	0.349033	477.378	347.039	472.21	373.759	223.199	49.2731	385.309	301.663	265.272	DUOXA1	no
gene11939	23.1311	-1.14245	0.728542	-1.56813	0.116851	0.258927	20.9727	12.0629	5.34174	17.1001	6.46954	66.7925	14.0844	24.0369	41.3197	DUOXA2	no
gene11940	71.4755	0.0143172	0.496563	0.0288327	0.976998	0.989479	71.9063	85.3679	58.7591	118.072	36.6607	22.9941	78.4703	92.5419	78.5074	DUOX2	no
gene11942	387.46	-0.0895705	0.269982	-0.331765	0.740067	0.848535	388.494	378.588	347.213	355.845	450.711	545.289	270.622	407.425	342.953	SORD	no
gene11944	0.601435	1.57145	2.69185	0.583781	0.559367	0.72413	0	0	3.20504	0	0	0	1.00603	1.20184	0	LOC101115542	no
gene11945	2509.68	-0.513933	0.288374	-1.78218	0.0747206	0.191393	1446.11	2071.1	2340.75	2274.31	3491.39	2328.98	2121.72	2870	3642.74	FERMT2	no
gene11946	2485.1	-0.860676	0.602712	-1.428	0.153291	0.312767	1750.72	1212.78	1865.33	3040.56	1591.51	420.464	3323.92	5655.87	3504.73	DDHD1	no
gene11949	1505.63	0.798013	0.244254	3.26714	0.00108639	0.00859719	2180.16	2039.55	2082.21	1391.62	1656.2	1136.57	1109.65	977.098	977.624	BMP4	no
gene1195	182.389	1.01598	0.329658	3.08192	0.00205667	0.0139027	182.762	270.022	372.853	175.887	159.582	88.6917	141.85	135.808	114.042	RFX5	no
gene11951	204.443	0.0791163	0.253466	0.312138	0.754935	0.85846	230.699	210.636	194.439	182.401	198.399	173.003	151.91	257.194	241.307	CDKN3	no
gene11952	2481.38	-0.19058	0.291984	-0.652709	0.513944	0.689495	1988.41	2033.98	2780.91	2066.67	2839.05	2032.24	2170	3904.79	2516.37	CNIH1	no
gene11953	1980.47	-0.37558	0.328768	-1.14239	0.253293	0.441108	1251.37	1469.81	2237.12	1746.65	2158.67	1773.83	1633.79	3419.24	2133.75	GMFB	no
gene11954	390.334	-0.814058	0.349958	-2.32616	0.02001	0.0748553	281.633	223.627	272.429	324.088	425.911	295.639	400.4	772.785	516.496	CGRRF1	no
gene11956	1679.69	-1.05354	0.437248	-2.40948	0.0159753	0.0637506	809.944	1023.49	1101.47	1633.47	2519.89	787.275	1799.79	1706.62	3735.3	SAMD4A	no
gene11957	288.679	-1.20171	0.411492	-2.92036	0.00349623	0.0207023	158.793	141.971	163.457	447.046	260.938	143.44	327.965	380.984	573.517	GCH1	no
gene11958	575.575	-0.178833	0.196948	-0.908021	0.363867	0.557223	470.387	599.431	517.08	631.075	707.336	525.58	531.183	610.536	587.566	WDHD1	no
gene11959	1438.01	-0.0139732	0.300956	-0.0464294	0.962968	0.98216	1125.53	1339.9	1820.46	1249.94	1497.7	1269.06	1069.41	2195.77	1374.29	SOCS4	no
gene11960	2957.74	0.000380613	0.238176	0.00159804	0.998725	0.999356	2858.27	3120.57	2896.29	2933.07	2574.88	2059.62	3343.03	3141.62	3692.33	MAPK1IP1L	no
gene11962	12878.4	0.614714	0.266939	2.30283	0.0212886	0.0783669	20299.5	11906	18054	9733.21	10642.4	13319.1	10244.4	13264.7	8442.44	LGALS3	no
gene11963	552.486	-0.159183	0.233771	-0.680938	0.495911	0.676321	516.327	532.621	488.235	490.203	612.45	701.869	429.574	673.032	528.065	DLGAP5	no
gene11964	670.606	0.229263	0.229007	1.00112	0.31677	0.509759	593.227	748.825	888.865	735.304	654.502	485.067	634.804	621.353	673.511	FBXO34	no
gene11966	775.778	-0.312774	0.320058	-0.977244	0.328449	0.522442	670.126	594.792	739.296	949.463	806.536	396.375	996.975	932.63	895.811	ATG14	no
gene11967	2.87343	-1.47033	1.33801	-1.09889	0.271814	0.4608	2.99609	0.927912	0	4.07145	3.23477	10.9496	0	1.20184	2.47918	TBPL2	no
gene11970	10645.1	-0.221637	0.379885	-0.583431	0.559603	0.724244	10544.3	9203.03	9005.1	11604.5	15037.4	4067.77	11107.6	12708.3	12528.1	KTN1	no
gene11971	5.56601	-0.721852	0.957269	-0.754075	0.450804	0.638337	2.99609	6.49538	2.13669	6.51432	3.23477	0	16.0965	6.00922	6.61115	LOC105615734	no
gene11974	1535.93	-1.35871	0.587669	-2.31203	0.020776	0.0769748	709.076	922.344	623.915	1369.64	1910.67	248.556	2286.7	2552.71	3199.8	PELI2	no
gene11975	1931.13	-0.246655	0.36793	-0.670384	0.502613	0.681171	1657.84	1597.86	1897.39	2290.6	1727.37	835.454	2090.53	2761.84	2521.33	TMEM260	no
gene11976	1.64558	-3.73329	2.44391	-1.52759	0.126615	0.273631	0	0	0	0	5.39128	0	1.00603	8.4129	0	OTX2	no
gene11978	2873.96	-0.127363	0.274136	-0.464596	0.642221	0.784735	2285.02	2422.78	3414.44	2760.44	3245.55	2050.86	2556.32	3825.47	3304.75	EXOC5	no
gene11979	1354.86	-0.23901	0.29155	-0.819791	0.412335	0.603449	971.733	1114.42	1542.69	1300.42	1413.59	895.676	1477.86	1846.03	1631.3	AP5M1	no
gene11980	9.4521	-1.09329	0.741765	-1.47391	0.140507	0.294737	9.98698	1.85582	4.27339	5.70003	8.62605	5.47479	11.0663	24.0369	14.0487	LOC106991261	no
gene11981	1118.01	0.12785	0.232471	0.549961	0.582346	0.740304	1121.54	968.74	1464.7	1021.12	966.118	1139.85	931.583	1372.5	1075.96	NAA30	no
gene11982	21.4543	-3.99489	0.764606	-5.22477	1.74e-07	6.66e-06	1.9974	3.71165	0	35.0145	26.9564	12.0445	41.2472	32.4498	39.6669	C7H14orf105	down
gene11983	5.75666	-1.69725	1.01889	-1.66578	0.0957565	0.225703	1.9974	2.78374	2.13669	4.88574	11.8608	0	17.1025	3.60553	7.43754	SLC35F4	no
gene11985	1284.97	0.206555	0.327252	0.631182	0.527921	0.700297	1348.24	1256.39	1626.02	974.706	1080.41	1907.42	880.275	1575.62	915.644	C7H14orf37	no
gene11988	2212.96	-0.402708	0.203195	-1.98188	0.0474929	0.1391	1920.5	1763.03	1782	2283.27	2345.21	1863.62	2400.39	2950.52	2608.1	ACTR10	no
gene1199	5993.99	-0.631873	0.558423	-1.13153	0.257832	0.445864	5750.5	3264.39	4145.19	4916.69	4741.09	18664.7	4090.51	5216	3156.82	PSMB4	no
gene11990	4153.02	-0.927059	0.345913	-2.68004	0.00736141	0.036163	3381.59	2210.29	2190.11	3674.89	4797.16	6016.8	3331.97	7816.79	3957.6	PSMA3	no
gene11991	3329.01	-0.416997	0.559153	-0.745765	0.45581	0.64281	3553.37	2273.38	2336.48	4012.82	3751.25	490.542	3889.31	4618.68	5035.22	ARID4A	no
gene11992	498.705	-0.184994	0.318272	-0.581246	0.561075	0.72518	472.384	466.74	431.612	416.102	472.276	902.246	409.454	453.095	464.433	TIMM9	no
gene11993	780.046	-1.13609	0.372298	-3.05156	0.00227653	0.0150621	341.555	557.675	401.699	934.806	1148.34	398.565	1021.12	1241.5	975.144	KIAA0586	no
gene11994	273.063	1.03542	0.318185	3.25415	0.00113732	0.00889717	350.543	435.191	458.321	204.387	268.486	124.825	278.67	158.643	178.501	DACT1	up
gene11996	1.20244	-2.18567	2.21328	-0.987524	0.323386	0.517196	0	0	1.06835	0.814291	0	0	0	4.80737	4.13197	LOC105612775	no
gene11997	0.916054	-2.92348	2.25543	-1.29619	0.194909	0.369777	0	0	0	0	1.07826	0	1.00603	1.20184	4.95836	LOC105612774	no
gene11998	4398.26	-0.491051	0.452926	-1.08417	0.278287	0.468367	3763.09	3217.07	3406.96	5465.52	5067.81	1181.46	5287.69	6352.94	5841.78	DAAM1	no
gene11999	37.0886	-0.795665	0.504888	-1.57593	0.115043	0.256424	19.974	42.6839	11.7518	47.2289	38.8172	72.2673	42.2532	21.6332	37.1877	GPR135	no
gene12	2101.22	0.19229	0.296496	0.648542	0.516634	0.691937	2449.81	2458.04	1967.9	2267.8	1258.33	2890.69	1996.97	1624.89	1996.57	FARP2	no
gene120	4146.54	0.84502	0.329741	2.56268	0.0103868	0.0465778	6527.49	4597.8	6532.94	4362.15	3872.02	4187.12	2063.37	2950.52	2225.48	EFHD1	no
gene1200	974.413	-0.165023	0.252595	-0.653309	0.513557	0.689243	753.018	1131.12	820.491	846.862	1042.67	810.27	1013.07	1029.98	1322.23	POGZ	no
gene12000	210.282	0.301214	0.278655	1.08095	0.279718	0.469714	219.714	205.069	297.001	201.13	207.025	266.075	176.055	137.01	183.459	L3HYPDH	no
gene12001	1061.58	-1.05147	0.359869	-2.92181	0.00348009	0.0206756	620.192	681.087	555.541	1087.08	1449.18	561.714	1236.41	1657.34	1705.68	JKAMP	no
gene12002	56.6611	-0.360467	0.646192	-0.557833	0.576958	0.736089	44.9414	88.1516	9.61513	25.243	86.2605	29.5639	53.3195	74.5143	98.3408	CCDC175	no
gene12003	287.455	0.736831	0.362033	2.03526	0.0418248	0.126701	350.543	504.784	320.504	289.073	338.573	116.066	201.206	254.791	211.557	RTN1	no
gene12006	75.8024	-0.556977	0.478507	-1.16399	0.244428	0.430824	47.9375	86.2958	38.4605	54.5575	116.452	49.2731	47.2834	137.01	104.952	LOC101117591	no
gene12007	1250.23	-0.811825	0.408543	-1.98712	0.0469087	0.137846	668.129	1133.91	692.289	1486.08	1752.17	513.536	1473.83	1733.06	1799.06	PCNXL4	no
gene12008	1297.53	-0.0345664	0.279504	-0.123671	0.901576	0.946229	1417.15	1084.73	1329.02	1459.21	1578.57	1659.96	1175.04	835.281	1138.77	DHRS7	no
gene12010	3.47746	-2.2338	1.3082	-1.70753	0.087723	0.213126	2.99609	0	0	5.70003	1.07826	12.0445	3.01809	4.80737	1.65279	LOC101103401	no
gene12011	1648.34	0.251518	0.280043	0.898143	0.36911	0.562534	1707.77	1716.64	2111.05	1497.48	1754.32	918.67	1445.66	1979.44	1704.02	PPM1A	no
gene12012	4.27763	-5.10897	1.48649	-3.43694	0.000588333	0.0053277	0	0	0	0.814291	6.46954	9.85463	6.03617	12.0184	3.30557	C7H14orf39	down
gene12014	5.09255	-0.633957	1.05204	-0.602598	0.546776	0.714839	4.99349	0.927912	5.34174	4.07145	8.62605	10.9496	1.00603	0	9.91672	SIX1	no
gene12018	15.425	-0.709649	0.777355	-0.912902	0.361294	0.554861	4.99349	7.4233	20.2986	39.0859	24.7999	3.28488	6.03617	18.0276	14.8751	SIX4	no
gene12019	1637.53	-1.4852	0.376113	-3.94882	7.85e-05	0.00106955	909.814	793.365	529.9	1977.91	2373.24	939.475	1865.18	3077.92	2270.93	MNAT1	down
gene1202	657.206	0.825995	0.442936	1.86482	0.0622067	0.168061	987.712	801.716	990.358	851.748	400.033	213.517	846.07	427.856	395.842	CGN	no
gene12021	168.857	0.351655	0.225566	1.55899	0.118999	0.262344	179.766	167.024	245.72	157.972	156.347	167.529	139.838	139.414	166.105	TRMT5	no
gene12022	492.291	-1.05467	0.353664	-2.98212	0.00286264	0.0177806	262.658	312.706	284.18	603.389	614.606	252.935	602.611	799.226	698.303	SLC38A6	no
gene12023	429.186	1.46793	0.351664	4.17425	2.99e-05	0.000495724	698.09	636.548	907.027	300.473	262.016	132.49	267.604	414.636	243.786	TMEM30B	up
gene12024	4443.8	-0.90587	0.416429	-2.17533	0.0296055	0.0993452	2603.61	3236.56	2584.33	6466.28	6705.68	1678.57	4484.88	6699.07	5535.18	PRKCH	no
gene12026	2928.59	-0.152927	0.36016	-0.424609	0.671122	0.803572	1969.43	2591.66	3615.29	2814.19	3580.89	1550.46	2454.71	4032.18	3748.52	HIF1A	no
gene12027	535.52	-1.13499	0.322468	-3.51971	0.000432018	0.00417398	309.596	296.932	287.385	596.875	597.354	382.141	558.346	807.639	983.408	SNAPC1	down
gene12028	188.566	1.47924	0.321237	4.60482	4.13e-06	9.5e-05	325.576	311.778	351.486	170.187	92.7301	137.965	142.856	76.918	87.5977	LOC101118878	up
gene12029	7.83833	-1.79879	0.840879	-2.13918	0.0324212	0.105873	0	5.56747	3.20504	7.32861	11.8608	3.28488	8.04823	18.0276	13.2223	SYT16	no
gene1203	2669.75	0.38976	0.340021	1.14628	0.251678	0.43933	3059.01	3083.45	3368.5	3656.98	2008.79	1363.22	3185.09	1903.72	2399.02	TUFT1	no
gene12031	505.822	0.332525	0.437551	0.759968	0.447274	0.635072	487.365	541.901	729.681	550.46	599.511	133.585	507.039	578.086	424.766	KCNH5	no
gene12033	1186.67	-1.22395	0.409229	-2.99087	0.00278181	0.0174193	452.41	690.366	740.365	1204.34	2138.18	585.803	1468.8	1367.7	2032.1	RHOJ	no
gene12034	2.3745	-0.746383	1.53332	-0.486776	0.626417	0.772522	2.99609	1.85582	0	0	2.15651	9.85463	0	1.20184	3.30557	GPHB5	no
gene12036	3410.1	-0.583106	0.348287	-1.67421	0.0940886	0.223074	2823.32	2407	2449.72	4169.98	4262.35	1733.32	3597.56	5582.56	3665.06	PPP2R5E	no
gene12038	546.158	-1.02491	0.279349	-3.66893	0.00024357	0.00264737	399.479	321.985	247.857	719.019	636.171	801.51	429.574	736.73	623.101	WDR89	down
gene12039	908.458	0.258411	0.317268	0.814489	0.415365	0.60589	877.856	874.093	1307.66	755.662	722.432	626.316	914.48	1360.49	737.143	SGPP1	no
gene12040	11634.3	-0.343511	0.5013	-0.685241	0.493192	0.674164	9064.18	10974.4	9559.57	14042.4	11287.2	2367.3	16967.7	16705.6	13740.4	SYNE2	no
gene12043	40.7409	-0.182758	0.899943	-0.203077	0.839075	0.909553	33.9557	34.3327	43.8022	37.4574	102.434	0	63.3798	37.2571	14.0487	ESR2	no
gene12044	7.65857	-1.45127	0.908465	-1.59749	0.110156	0.248874	4.99349	5.56747	0	10.5858	5.39128	22.9941	3.01809	4.80737	11.5695	LOC105607025	no
gene12045	184.471	0.856297	0.600894	1.42504	0.154146	0.314094	181.763	358.174	248.925	150.644	185.46	14.2345	182.091	167.056	171.89	MTHFD1	no
gene12046	552.878	-0.810722	0.412596	-1.96493	0.0494225	0.142975	344.551	504.784	254.267	732.861	711.649	228.846	675.045	788.409	735.49	ZBTB25	no
gene12049	1272.09	0.0193251	0.384631	0.0502431	0.959929	0.980352	866.87	1307.43	1676.24	1292.28	1392.03	533.245	1199.19	1700.61	1480.9	ZBTB1	no
gene12050	2474.2	1.74244	0.41567	4.19189	2.77e-05	0.000463182	5281.12	3254.19	5401.56	1747.47	1345.66	2251.24	1141.84	1283.57	561.121	HSPA2	up
gene12051	471.039	-1.20404	0.462674	-2.60236	0.00925858	0.0427382	281.633	325.697	148.5	510.56	761.249	174.098	621.726	662.216	753.671	PPP1R36	no
gene12052	1211.44	0.178365	0.380382	0.468909	0.639134	0.782795	1047.63	1564.46	1327.96	1293.09	1323.02	441.268	1346.07	1087.67	1471.81	PLEKHG3	no
gene12053	305.643	1.35444	0.285848	4.73833	2.15e-06	5.5e-05	485.367	411.065	647.419	175.887	159.582	259.505	244.465	152.634	214.862	SPTB	up
gene12054	2634.6	-0.282002	0.310993	-0.906779	0.364524	0.557747	2397.87	1787.16	2724.29	2535.7	2491.85	1835.15	2818.89	4347.07	2773.38	CHURC1	no
gene12055	2584.92	0.736926	0.500617	1.47204	0.141011	0.295431	5419.94	1734.27	3419.78	1792.25	2347.36	2026.77	1832.98	3937.24	753.671	GPX2	no
gene12056	794.443	1.46269	0.319557	4.57726	4.71e-06	0.000106438	2067.31	797.076	1278.81	515.446	502.468	536.53	535.207	531.215	385.926	LOC105615749	up
gene12057	185.577	0.792229	0.505888	1.56601	0.117345	0.259762	293.617	189.294	292.727	187.287	105.669	36.1336	193.158	131.001	241.307	LOC101110847	no
gene12058	740.846	-0.0445953	0.219454	-0.203211	0.83897	0.909507	770.995	777.59	628.188	912.005	692.241	861.733	682.088	740.335	602.441	FNTB	no
gene1206	53.3297	-2.11421	0.398973	-5.29915	1.16e-07	4.75e-06	14.9805	16.7024	18.1619	87.9434	37.739	59.1278	83.5004	70.9087	90.9033	LOC105613572	down
gene12060	559.47	0.439088	0.419132	1.04761	0.294816	0.486195	719.063	625.413	690.152	540.689	471.198	152.199	621.726	526.407	688.386	MAX	no
gene12062	951.956	-0.797672	0.418844	-1.90446	0.0568504	0.157841	650.153	601.287	662.375	997.506	1160.2	362.431	1188.12	1754.69	1190.83	FUT8	no
gene12068	0.681492	-1.24308	2.33422	-0.532547	0.594348	0.748063	0.998698	0	0	0	1.07826	0	0	2.40369	1.65279	LOC101111970	no
gene12069	3230.08	-1.4179	0.538971	-2.63075	0.00851975	0.0401522	1706.78	1824.27	1051.25	4190.34	5284.54	716.103	3962.75	6583.7	3751	GPHN	no
gene1207	14321	-1.25101	0.421947	-2.96486	0.00302822	0.0185816	9775.26	5771.61	6828.88	19366.3	15061.1	25868.4	9872.16	27238.6	9106.86	SNX27	no
gene12071	16.6345	-2.09918	0.904084	-2.32188	0.0202392	0.0753948	3.99479	8.35121	3.20504	12.2144	24.7999	0	26.1568	42.0645	28.9238	FAM71D	no
gene12072	1731.66	-0.103156	0.330708	-0.311926	0.755097	0.858489	1454.1	1625.7	1870.68	1943.71	1748.93	827.789	1818.9	2344.8	1950.29	MPP5	no
gene12073	85.0201	-0.974278	0.616609	-1.58006	0.114094	0.255086	43.9427	76.0888	35.2555	201.13	98.1213	14.2345	86.5185	92.5419	117.348	ATP6V1D	no
gene12074	498.88	-0.962784	0.464561	-2.07246	0.0382224	0.118518	337.56	360.958	217.943	487.76	533.737	185.048	634.804	1026.37	705.74	EIF2S1	no
gene12075	455.02	1.12638	0.338464	3.32792	0.000874969	0.00725721	809.944	581.801	745.707	450.303	201.634	254.03	423.538	389.397	238.828	PLEK2	up
gene12077	4381.35	1.28344	0.444924	2.88462	0.00391883	0.0225212	8393.06	5077.53	8176.06	3833.68	1296.06	1691.71	3919.49	4683.58	2361.01	TMEM229B	no
gene12078	255.369	-0.116128	0.447456	-0.25953	0.795227	0.88116	286.626	204.141	235.036	332.231	214.573	74.4572	364.182	292.048	295.022	PLEKHH1	no
gene12079	202.055	-0.209212	0.359306	-0.582266	0.560387	0.724855	235.693	116.917	196.576	210.901	130.469	152.199	260.562	292.048	223.126	PIGH	no
gene12080	454.564	-0.626055	0.267629	-2.33926	0.019322	0.0732019	275.641	365.597	360.033	569.189	411.894	358.052	520.117	616.545	614.01	ARG2	no
gene12081	1416.21	0.315506	0.439213	0.718344	0.472545	0.656557	1906.51	1211.85	1770.25	1031.71	1085.8	2908.21	959.752	973.493	898.29	VTI1B	no
gene12082	896.684	0.703883	0.252139	2.79165	0.00524408	0.0279737	1325.27	990.082	1307.66	893.277	516.485	637.266	833.998	812.446	753.671	RDH11	no
gene12084	2285.6	0.35459	0.532703	0.665643	0.505639	0.683706	3998.79	1340.83	2682.62	2700.19	976.9	800.415	2678.05	3683.65	1708.98	RDH12	no
gene12085	1712.84	-0.142723	0.260484	-0.547916	0.58375	0.741407	1557.97	1557.96	1690.13	2254.77	1448.1	1221.97	2128.76	1608.07	1947.81	ZFYVE26	no
gene12087	2504.17	-1.2963	0.475464	-2.7264	0.00640295	0.0324775	1625.88	1268.46	917.71	3281.59	3112.93	852.973	3757.52	5133.07	2587.44	RAD51B	no
gene1209	22.0238	-0.613516	0.583035	-1.05228	0.292671	0.483589	16.9779	13.9187	18.1619	30.1288	14.0173	7.66471	48.2894	16.8258	32.2293	CELF3	no
gene12097	1124.94	1.72248	0.4827	3.56843	0.000359122	0.00362965	1518.02	2083.16	2702.92	749.147	798.988	148.914	871.221	693.463	558.642	ZFP36L1	up
gene12098	4281.58	1.43852	0.185282	7.76395	8.23e-15	2.98e-12	7336.44	6845.21	7991.24	2582.93	3360.93	2475.7	2875.23	2502.24	2564.3	ACTN1	up
gene121	164.341	0.920579	0.265918	3.46189	0.000536392	0.00496625	193.747	244.041	280.975	95.272	124	170.814	131.79	117.781	120.653	ZSCAN20	no
gene1210	194.647	-1.2244	0.310282	-3.9461	7.94e-05	0.00108007	128.832	105.782	73.716	201.13	256.625	335.057	197.182	269.213	184.286	RIIAD1	down
gene12100	1634.76	0.0593163	0.276713	0.21436	0.830266	0.903257	1523.01	1737.98	1778.8	1561.81	1758.64	927.43	1591.54	1867.66	1965.99	DCAF5	no
gene12101	142.832	0.214404	0.451776	0.474581	0.635086	0.780204	94.8763	197.645	179.482	132.729	160.66	41.6084	181.085	147.827	149.577	EXD2	no
gene12102	620.208	-0.734991	0.384409	-1.912	0.0558761	0.156005	351.542	479.73	458.321	518.703	1001.7	822.314	627.762	329.305	992.499	GALNT16	no
gene12104	543.758	-0.914817	0.465989	-1.96317	0.0496259	0.143317	417.456	322.913	285.249	477.989	515.407	1514.33	409.454	504.774	446.252	ERH	no
gene12105	1049.41	0.430534	0.187868	2.29168	0.021924	0.0800105	1067.61	1213.71	1521.33	1034.15	949.944	960.279	884.299	926.621	886.72	SLC39A9	no
gene12106	49.814	0.182409	0.552222	0.330318	0.741159	0.849179	39.9479	72.3771	50.2123	100.972	23.7216	18.6143	63.3798	46.8719	32.2293	PLEKHD1	no
gene12107	0.880841	3.16499	2.30727	1.37175	0.170142	0.336345	4.99349	1.85582	0	0	1.07826	0	0	0	0	CCDC177	no
gene12108	1345.74	-0.974945	0.563279	-1.73084	0.0834805	0.20621	640.166	1067.1	748.912	2183.93	1124.62	241.986	1919.5	2269.08	1916.41	SUSD6	no
gene1211	741.714	0.210051	0.346655	0.605937	0.544557	0.713245	1028.66	666.241	751.048	741.004	715.962	1192.41	516.093	551.646	512.364	MRPL9	no
gene12110	4049.54	-0.647173	0.42939	-1.50719	0.131762	0.281264	2817.33	3622.57	2380.28	5769.25	3781.45	1668.72	6276.61	3509.38	6620.24	SRSF5	no
gene12111	373.062	-1.29289	0.632816	-2.04308	0.0410448	0.125064	195.745	280.229	92.9462	381.902	590.885	53.653	782.691	439.875	539.635	SLC10A1	no
gene12113	144.741	0.525676	0.476005	1.10435	0.269441	0.458352	175.771	182.799	186.961	163.672	111.06	29.5639	190.139	121.386	141.313	SMOC1	no
gene12114	22.2839	-1.6229	0.501374	-3.23691	0.00120833	0.00931203	3.99479	10.207	13.8885	19.543	35.5825	37.2286	24.1447	20.4313	35.5349	SLC8A3	down
gene12116	759.894	0.095996	0.20082	0.47802	0.632636	0.778217	622.189	802.644	957.239	743.447	760.171	738.002	671.021	782.4	761.935	SYNJ2BP	no
gene12117	1173.6	-1.35518	0.426289	-3.17902	0.00147774	0.0108169	652.15	524.27	550.199	859.891	1214.12	2728.64	835.004	2039.53	1158.6	LOC101121607	no
gene12118	0.245319	-0.956939	3.53382	-0.270795	0.786549	0.875488	0	0	0	0	0	0	1.00603	1.20184	0	LOC101122955	no
gene1212	4.05916	-0.0976438	0.944933	-0.103334	0.917698	0.956254	0.998698	7.4233	3.20504	4.07145	5.39128	0	4.02412	4.80737	6.61115	OAZ3	no
gene12120	1.89239	-2.91439	1.83575	-1.58757	0.112384	0.252526	0.998698	0	0	1.62858	0	0	7.0422	2.40369	4.95836	LOC101123216	no
gene12121	1.80545	-3.88068	2.05579	-1.88769	0.0590678	0.162046	0	0	0	1.62858	2.15651	0	10.0603	2.40369	0	LOC105614185	no
gene12122	6.35639	-1.79482	0.918468	-1.95414	0.0506844	0.145616	1.9974	0	5.34174	2.44287	5.39128	6.56975	13.0784	10.8166	11.5695	LOC101101897	no
gene12125	19.3198	-1.37423	0.482434	-2.84853	0.00439213	0.0245038	6.99089	7.4233	13.8885	23.6144	15.0956	17.5193	29.1748	31.2479	28.9238	LOC101102399	no
gene12126	1056.27	-0.863404	0.230883	-3.73957	0.000184336	0.00210375	819.931	724.699	504.26	1138.38	1210.88	1124.52	1166.99	1501.1	1315.62	MED6	no
gene12128	1002.18	0.340298	0.269108	1.26454	0.206036	0.384165	1279.33	1141.33	1075.83	1008.09	1027.58	561.714	1169.01	898.979	857.796	TTC9	no
gene12129	743.227	-0.0315963	0.225074	-0.140382	0.888358	0.93984	585.237	939.975	671.991	859.077	746.154	652.595	705.226	751.152	777.636	MAP3K9	no
gene1213	39.406	0.513061	0.483296	1.06159	0.288423	0.479257	29.9609	54.7468	63.0325	51.3003	33.426	58.0328	23.1387	22.835	18.1807	TDRKH	no
gene12130	2648.14	-0.280713	0.339219	-0.827527	0.407939	0.599435	1891.53	2518.35	2539.46	2959.95	3144.2	1282.2	2697.16	3642.79	3157.65	PCNX	no
gene12131	2722.14	-0.618384	0.406234	-1.52224	0.12795	0.275476	1830.61	2404.22	1784.14	3332.89	3760.96	1017.22	2823.92	3871.14	3674.15	SIPA1L1	no
gene12133	1218.91	-2.97879	0.622062	-4.78858	1.68e-06	4.46e-05	216.718	335.904	101.493	1503.99	3305.93	264.98	1806.83	1266.74	2167.63	RGS6	down
gene12137	357.626	-1.3101	0.555969	-2.35643	0.0184515	0.0708151	245.68	193.934	100.425	537.432	651.267	88.6917	669.009	407.425	324.773	DPF3	no
gene12139	668.076	-0.258281	0.286556	-0.90133	0.367413	0.56067	593.227	785.014	394.22	749.147	658.815	523.39	739.431	693.463	875.977	DCAF4	no
gene1214	8.15595	0.466019	0.78029	0.597238	0.550348	0.717543	11.9844	7.4233	10.6835	14.6572	1.07826	9.85463	10.0603	6.00922	1.65279	LINGO4	no
gene12140	993.726	-0.155128	0.249019	-0.622957	0.533312	0.704527	897.83	975.235	898.48	1091.96	763.406	1416.88	915.486	891.768	1092.49	ZFYVE1	no
gene12141	5297.42	-0.510715	0.39458	-1.29433	0.195553	0.370334	5073.39	4114.36	3197.56	7186.11	7224.32	2143.93	6508	5256.86	6972.28	RBM25	no
gene12143	1791.96	-0.346965	0.188117	-1.84441	0.065123	0.173538	1401.17	1463.32	1686.92	2086.21	1888.03	1527.47	1950.69	2114.04	2009.79	PSEN1	no
gene12145	1389.87	1.27611	0.327627	3.89501	9.82e-05	0.00128446	2262.05	2426.49	2163.4	1388.37	560.693	781.801	1255.52	752.354	918.123	PAPLN	up
gene12146	3880.43	-0.292731	0.395593	-0.739982	0.459311	0.645805	3369.61	3730.21	3023.42	5161.79	3663.92	1420.16	4548.26	5139.08	4867.46	NUMB	no
gene12148	289.463	-0.0340683	0.230485	-0.147811	0.882492	0.936446	305.602	274.662	274.565	333.045	280.347	377.761	259.555	247.58	252.05	HEATR4	no
gene1215	1293.73	-0.0719803	0.650743	-0.110612	0.911924	0.952343	1631.87	1103.29	1018.14	1742.58	681.458	152.199	2812.86	1377.31	1123.9	RORC	no
gene12150	29.2168	0.208585	0.591044	0.352909	0.724156	0.837738	32.957	24.1257	39.5289	35.8288	12.9391	6.56975	22.1326	38.459	50.41	LOC101104407	no
gene12151	89.4143	-0.2774	0.320302	-0.866056	0.386459	0.579311	96.8737	59.3864	79.0577	107.486	74.3997	62.4127	94.5667	118.982	111.563	LOC101103726	no
gene12152	23.2034	-1.50968	0.522683	-2.88833	0.00387296	0.0223363	5.99219	8.35121	17.0936	32.5716	34.5042	12.0445	26.1568	32.4498	39.6669	LOC101104669	no
gene12153	93.8961	0.259019	0.367286	0.705224	0.480671	0.664514	127.833	96.5028	91.8779	92.0148	80.8692	41.6084	109.657	126.194	78.5074	LOC106990150	no
gene12154	97.7089	-0.127403	0.41304	-0.308453	0.757738	0.860297	126.835	58.4585	90.8095	97.7149	92.7301	59.1278	162.977	123.79	66.9379	LOC101103981	no
gene12156	87.1041	-0.449247	0.577577	-0.777813	0.436679	0.624763	54.9284	90.9354	64.1008	90.3863	99.1996	15.3294	84.5064	188.689	95.8616	DNAL1	no
gene12157	24.6334	0.0962936	0.644572	0.149392	0.881245	0.935712	20.9727	29.6932	26.7087	39.0859	4.31303	7.66471	37.2231	31.2479	24.7918	PNMA1	no
gene12158	684.23	0.284157	0.363296	0.782164	0.434118	0.622341	616.197	912.137	802.329	738.562	540.207	280.309	874.239	698.271	695.823	ELMSAN1	no
gene12159	657.643	-0.0987297	0.332933	-0.296545	0.766814	0.866465	677.117	489.01	717.929	627.004	645.876	382.141	568.406	991.521	819.782	PTGR2	no
gene1216	11.2203	-0.122387	0.619518	-0.197551	0.843396	0.91201	16.9779	6.49538	8.54678	11.4001	5.39128	7.66471	19.1146	7.21106	18.1807	C2CD4D	no
gene12160	2000.24	-0.579775	0.217472	-2.66598	0.00767641	0.037286	1476.08	1584.87	1451.88	2518.6	1877.24	2863.32	1964.77	1934.97	2330.43	ZNF410	no
gene12161	134.067	0.971676	0.267119	3.63761	0.000275178	0.00291486	166.783	180.015	251.062	113.186	84.104	79.932	123.742	106.964	100.82	FAM161B	no
gene12162	367.008	-0.0686498	0.34718	-0.197736	0.843252	0.91191	390.491	361.886	314.094	484.503	232.903	583.613	365.189	270.415	299.981	COQ6	no
gene12163	323.766	-0.167885	0.314472	-0.533864	0.593436	0.747604	209.727	323.841	364.306	407.145	317.007	208.042	291.748	368.966	423.113	ENTPD5	no
gene12164	36.1358	-1.2388	0.743859	-1.66536	0.09584	0.225869	24.9675	14.8466	17.0936	44.786	42.052	1.09496	49.2954	62.4958	68.5907	BBOF1	no
gene12165	189.265	1.03513	0.61226	1.69067	0.0909007	0.218226	121.841	259.815	480.756	196.244	141.252	19.7093	174.043	137.01	172.716	ALDH6A1	no
gene12166	737.28	-0.889339	0.429075	-2.07269	0.0382012	0.118492	423.448	580.873	405.972	937.248	1213.04	292.354	655.931	1173	953.658	LIN52	no
gene12167	0.765279	-2.64834	2.23511	-1.18488	0.236064	0.421225	0	0	0	0.814291	3.23477	0	2.01206	0	0.826394	VSX2	no
gene12168	816.004	-0.39808	0.334223	-1.19106	0.233629	0.41852	563.266	1006.78	449.774	855.819	677.145	855.163	1271.62	746.345	918.123	ABCD4	no
gene1217	472.787	-0.290326	0.538568	-0.53907	0.589838	0.745319	562.267	313.634	358.965	683.19	171.443	209.137	783.697	812.446	360.308	THEM5	no
gene12170	7.92624	-0.474294	0.998633	-0.474943	0.634828	0.780071	10.9857	3.71165	4.27339	6.51432	5.39128	18.6143	2.01206	0	19.8334	SYNDIG1L	no
gene12171	4734.92	-0.0681832	0.288443	-0.236384	0.813135	0.893322	5799.44	3340.48	4620.6	3850.78	4186.87	6413.17	3834.98	5840.96	4726.97	NPC2	no
gene12172	109.395	0.241532	0.311966	0.774226	0.438797	0.626581	161.789	94.647	108.971	74.9147	115.373	101.831	80.4823	135.808	110.737	ISCA2	no
gene12173	1223.93	0.660575	0.284091	2.32522	0.02006	0.074933	1185.45	1890.16	1787.35	1033.33	869.075	1351.18	1166.99	707.886	1023.9	LTBP2	no
gene12174	693.249	-0.19384	0.54644	-0.354732	0.72279	0.836722	468.389	783.158	646.35	815.105	665.284	108.401	978.866	847.299	926.387	AREL1	no
gene12177	1195.69	-1.32971	0.344373	-3.86125	0.000112808	0.0014298	865.871	476.019	443.364	1161.99	1442.71	2258.9	1125.75	1722.24	1264.38	FCF1	down
gene12178	2266.57	0.0368935	0.168594	0.218831	0.826782	0.901399	2309.99	2409.79	2196.52	2437.99	2348.44	1827.49	2263.57	2319.56	2285.8	YLPM1	no
gene12179	39.5066	-1.73054	0.443338	-3.90344	9.48e-05	0.00125259	17.9766	6.49538	22.4353	55.3718	47.4433	29.5639	60.3617	58.8903	57.0212	PROX2	down
gene1218	350.183	-0.885427	0.309837	-2.85772	0.00426698	0.024032	234.694	205.069	231.831	457.631	326.712	229.941	526.153	460.306	479.308	THEM4	no
gene12180	1845.51	0.682455	0.264223	2.58288	0.00979798	0.0444425	2262.05	2594.44	2538.39	1665.22	1231.37	2123.13	1575.44	1068.44	1551.14	DLST	no
gene12181	145.506	-0.922832	0.393339	-2.34615	0.0189685	0.0723147	56.9258	139.187	76.921	136.801	181.147	267.17	158.953	108.166	184.286	RPS6KL1	no
gene12182	278.536	-0.193676	0.592158	-0.327068	0.743616	0.851011	302.606	251.464	208.328	192.987	171.443	855.163	139.838	161.047	223.953	PGF	no
gene12183	1093.17	0.612269	0.522622	1.17153	0.241384	0.427198	1722.75	1237.83	1301.25	712.504	689.006	2435.19	560.358	686.252	493.357	EIF2B2	no
gene12184	453.069	-0.543609	0.314594	-1.72797	0.0839936	0.207045	402.475	295.076	344.008	588.732	484.137	272.645	591.545	647.793	451.211	MLH3	no
gene12185	134.776	-0.8483	0.423444	-2.00333	0.0451413	0.133938	110.855	78.8725	73.716	121.329	154.191	316.443	92.5547	139.414	125.612	ACYP1	no
gene12186	77.0317	0.219675	0.322741	0.680656	0.496089	0.676367	68.9102	73.305	113.245	70.029	80.8692	58.0328	51.3075	81.7253	95.8616	ZC2HC1C	no
gene12187	1364.38	0.589184	0.261971	2.24904	0.0245097	0.086875	1248.37	1914.28	2108.92	1168.51	1202.26	1508.85	1066.39	907.391	1154.47	NEK9	no
gene12188	5744.94	0.271012	0.192913	1.40484	0.160069	0.322389	6560.45	5643.56	7251.94	5629.19	5693.19	5666.41	4817.87	6014.02	4427.82	TMED10	no
gene1219	4.18513	-1.20713	1.17888	-1.02397	0.305851	0.4983	0.998698	4.63956	1.06835	16.2858	5.39128	0	4.02412	3.60553	1.65279	LOC105615685	no
gene12191	2128.13	-3.11399	0.838717	-3.7128	0.000204979	0.00230235	184.759	318.274	542.72	429.945	3912.99	419.369	4807.81	7662.95	874.324	FOS	down
gene12194	356.644	-0.981652	0.33285	-2.94923	0.00318564	0.0192639	226.704	255.176	166.662	371.316	534.815	291.259	449.695	296.855	617.316	JDP2	no
gene12195	40.812	-1.00198	0.488446	-2.05135	0.0402327	0.123245	23.9688	26.9094	22.4353	26.0573	23.7216	79.932	38.2291	51.6793	74.3754	BATF	no
gene12196	135.621	-1.03262	0.486829	-2.12112	0.0339118	0.109115	54.9284	112.277	72.6476	192.987	157.425	52.558	163.983	126.194	287.585	LOC101108756	no
gene12198	616.068	0.387731	0.966191	0.401298	0.688201	0.814671	1176.47	252.392	763.868	427.503	140.173	4.37984	703.214	1200.64	875.977	LOC101110417	no
gene12199	1.44286	-3.54404	2.15397	-1.64536	0.0998965	0.232194	0	0	0	0	7.5478	0	1.00603	3.60553	0.826394	LOC105615769	no
gene122	92.3895	-1.78938	0.533138	-3.35631	0.000789891	0.00666994	32.957	54.7468	17.0936	76.5433	207.025	45.9883	174.043	118.982	104.126	CSMD2	down
gene1220	13499.5	-0.648973	0.526464	-1.2327	0.217687	0.399274	11745.7	7751.78	9876.87	7257.77	12783.8	39718.5	9971.76	9727.72	12662	S100A10	no
gene12200	40.2634	1.21048	0.573899	2.10922	0.0349257	0.111433	73.9037	20.4141	100.425	47.2289	12.9391	17.5193	39.2351	30.0461	20.6598	LOC105615770	no
gene12201	185.586	1.35287	0.334159	4.04857	5.15e-05	0.000772946	422.449	177.231	337.598	127.844	92.7301	100.736	123.742	133.405	154.536	LOC101110679	up
gene12202	1887.12	-0.924136	0.296194	-3.12004	0.00180826	0.0126074	1182.46	1302.79	1056.6	2533.26	2611.54	1203.36	2188.11	2734.19	2171.76	TTLL5	no
gene12205	284.455	0.352315	0.360491	0.977318	0.328412	0.522435	304.603	328.481	364.306	256.502	284.66	431.414	263.58	140.616	185.939	TGFB3	no
gene12206	848.219	-1.44303	0.322691	-4.47188	7.75e-06	0.000161604	428.442	546.54	210.464	1270.29	1024.34	897.866	1184.1	915.804	1156.12	IFT43	down
gene12208	1229.73	-0.383109	0.430229	-0.890477	0.37321	0.566498	849.892	1309.28	908.095	1207.59	1608.76	411.705	1458.74	1469.85	1843.68	GPATCH2L	no
gene12209	2.39508	-3.24902	1.84927	-1.75692	0.0789311	0.198218	0	0.927912	0	0	4.31303	9.85463	0	4.80737	1.65279	ESRRB	no
gene12210	79.1515	0.0129811	0.364277	0.0356353	0.971573	0.986573	51.9323	89.0795	98.288	94.4577	92.7301	44.8933	89.5366	58.8903	92.5561	VASH1	no
gene12211	277.519	0.0503809	0.234209	0.21511	0.829681	0.903063	311.594	272.806	268.155	274.416	279.268	198.188	296.779	255.993	340.474	ANGEL1	no
gene12212	3.6715	-1.95288	1.21308	-1.60985	0.10743	0.244581	0	3.71165	0	9.77149	3.23477	1.09496	7.0422	2.40369	5.78475	LRRC74A	no
gene12216	936.716	2.08236	0.291209	7.15075	8.63e-13	1.87e-10	1762.7	1756.54	2207.21	406.331	608.137	353.672	599.593	317.287	418.982	IRF2BPL	up
gene12219	164.541	0.940137	0.516401	1.82056	0.0686742	0.180803	133.826	260.743	331.188	110.744	78.7127	64.6026	127.766	86.5327	286.759	CIPC	no
gene1222	6328.69	0.783091	0.49361	1.58646	0.112636	0.252868	11048.6	6333	8960.23	3673.26	4851.08	12103.7	3383.28	4059.83	2545.29	S100A11	no
gene12220	2.20444	-4.18139	1.82572	-2.29027	0.0220059	0.0802258	0	0	0	0.814291	7.5478	0	2.01206	1.20184	8.26394	ZDHHC22	no
gene12221	20.5138	-0.550541	0.461134	-1.19388	0.232523	0.417197	10.9857	15.7745	20.2986	16.2858	11.8608	28.4689	27.1628	24.0369	29.7502	TMEM63C	no
gene12222	3.80683	0.839686	1.0518	0.798334	0.424677	0.613578	5.99219	4.63956	5.34174	0.814291	8.62605	0	2.01206	6.00922	0.826394	NGB	no
gene12223	358.111	0.426959	0.345813	1.23465	0.21696	0.398343	439.427	429.623	426.271	267.087	308.381	587.993	274.646	225.946	263.62	POMT2	no
gene12224	344.938	0.263736	0.40285	0.654675	0.512677	0.688558	574.251	301.571	288.454	298.03	352.59	580.328	223.338	251.185	234.696	GSTZ1	no
gene12225	148.66	-0.570597	0.536373	-1.06381	0.287417	0.478167	65.9141	171.664	99.3563	182.401	213.495	32.8488	169.013	198.304	204.946	TMED8	no
gene12226	35.7227	-0.00564649	0.545397	-0.010353	0.99174	0.997842	37.9505	23.1978	45.9389	38.2717	52.8346	6.56975	46.2773	32.4498	38.0141	SAMD15	no
gene12227	10.0506	-1.74778	0.839449	-2.08206	0.0373372	0.116892	2.99609	6.49538	2.13669	11.4001	9.70431	35.0387	5.03014	3.60553	14.0487	NOXRED1	no
gene12228	779.867	-0.219477	0.236939	-0.9263	0.35429	0.548325	720.061	772.951	615.368	834.648	670.676	1130	761.564	736.73	776.81	VIPAS39	no
gene12229	2130.22	0.0951519	0.497805	0.191143	0.848414	0.915373	2513.72	2049.76	2111.05	1929.87	1797.45	5059.8	1476.85	1020.36	1213.15	AHSA1	no
gene12230	18.5464	-0.17777	0.485629	-0.36606	0.71432	0.830435	15.9792	21.342	13.8885	32.5716	17.2521	21.8992	9.05426	19.2295	15.7015	ISM2	no
gene12231	1852	0.219946	0.219566	1.00173	0.316475	0.509608	1706.78	2026.56	2401.65	1723.04	1805	1419.07	1743.45	1652.53	2189.94	SPTLC2	no
gene12235	444.895	-0.292101	0.233844	-1.24913	0.211618	0.391858	357.534	487.154	316.231	563.489	451.789	411.705	414.484	484.343	517.322	ALKBH1	no
gene12236	2053.28	-0.828732	0.411389	-2.01447	0.04396	0.131311	1938.47	1052.25	1068.35	1859.84	2660.06	3345.1	1393.35	3683.65	1478.42	SLIRP	no
gene12237	2504.35	-0.160661	0.218234	-0.736188	0.461616	0.647247	2886.24	1827.06	2253.14	2830.47	2921	2393.58	2656.92	2237.83	2532.9	SNW1	no
gene12238	232.909	-1.0129	0.32109	-3.15456	0.00160741	0.0115377	143.813	155.889	116.45	317.573	342.886	141.25	287.724	311.277	279.321	ADCK1	no
gene1224	31.4985	-0.363872	0.396802	-0.917011	0.359137	0.553079	25.9662	19.4862	34.1871	49.6717	43.1303	25.1841	28.1688	31.2479	26.4446	LOC105613035	no
gene12241	392.721	-1.46956	0.686407	-2.14095	0.0322778	0.10554	136.822	370.237	33.1188	395.745	677.145	308.778	236.417	1109.3	266.925	NRXN3	no
gene12246	1674.63	0.283078	0.411586	0.687774	0.491595	0.673136	2082.29	1338.98	2279.85	1883.45	1360.76	2929.01	1203.21	1023.97	970.186	DIO2	no
gene1225	2943.83	1.45527	0.498641	2.91848	0.00351744	0.0207851	3501.44	4384.38	7434.63	3223.78	1935.47	721.578	2107.63	2335.18	850.359	TCHHL1	no
gene12250	769.049	-1.37287	0.470127	-2.92022	0.00349789	0.0207045	340.556	512.207	267.087	1048.81	1266.95	249.651	989.933	1246.31	999.936	CEP128	no
gene12253	59.3158	-0.0402614	0.560932	-0.0717759	0.94278	0.970826	70.9076	78.8725	24.572	28.5002	69.0084	24.0891	48.2894	106.964	82.6394	TSHR	no
gene12254	1631.03	-0.226251	0.420111	-0.538551	0.590197	0.745481	1332.26	1331.55	1731.79	1618.81	1823.33	544.195	1714.27	2478.2	2104.82	GTF2A1	no
gene12255	1493.3	-0.252061	0.424186	-0.594223	0.552363	0.718703	907.817	1522.7	1543.76	2320.73	1799.61	542.005	1433.59	1820.79	1548.66	STON2	no
gene12256	594.842	0.733993	0.57691	1.27228	0.203273	0.380531	435.432	897.291	1098.26	648.99	542.363	67.8874	501.002	525.205	637.149	SEL1L	no
gene1226	174473	0.718925	0.605869	1.1866	0.235385	0.420372	284565	187895	236427	98971.3	132548	411756	57015.7	104642	56437.7	LOC101120969	no
gene12263	3675.31	-0.679752	0.293767	-2.31392	0.0206722	0.0766236	2632.57	2857.04	2379.21	4083.67	4679.63	2330.07	5038.19	3818.26	5259.17	FLRT2	no
gene12264	572.129	-0.0443245	0.533286	-0.0831158	0.933759	0.965436	403.474	476.947	801.261	669.347	492.763	105.116	765.588	669.427	765.24	GALC	no
gene12266	15.1669	-1.43272	0.604736	-2.36917	0.017828	0.0691086	3.99479	5.56747	11.7518	13.8429	18.3304	18.6143	11.0663	38.459	14.8751	GPR65	no
gene12268	49.2677	-1.77013	0.798936	-2.21561	0.0267185	0.0923628	9.98698	38.0444	8.54678	74.9147	112.139	3.28488	45.2713	52.8811	98.3408	KCNK10	no
gene12269	666.655	-1.03529	0.294607	-3.51413	0.000441194	0.00425107	334.564	573.45	268.155	743.447	877.701	672.305	712.269	870.134	947.873	SPATA7	down
gene1227	508.762	-1.97042	0.567537	-3.47187	0.00051684	0.00484074	164.785	193.006	160.252	1024.38	525.111	1310.67	522.129	550.444	128.091	RPTN	down
gene12270	2491.05	0.0133055	0.261052	0.050969	0.95935	0.980352	2188.15	2721.57	2609.97	3053.59	2381.87	1649.01	3065.37	2176.54	2573.39	PTPN21	no
gene12271	1404.37	-0.232019	0.222717	-1.04177	0.297519	0.489208	1274.34	1162.67	1337.57	1491.78	1219.51	1872.38	1452.71	1181.41	1647	ZC3H14	no
gene12272	1186.64	-1.10527	0.510424	-2.1654	0.030357	0.101197	615.198	710.781	688.016	1233.65	1328.41	277.025	1890.33	2032.32	1904.01	EML5	no
gene12274	488.155	-0.324651	0.405484	-0.800652	0.423333	0.612328	368.52	583.657	301.274	520.332	526.189	201.472	719.311	579.288	593.351	TTC8	no
gene12276	3819.71	-1.24166	0.536404	-2.31478	0.0206249	0.0764948	2196.14	2515.57	1288.43	6296.09	5174.55	781.801	5812.84	5069.37	5242.64	FOXN3	no
gene12278	1058.82	-1.02402	0.301188	-3.39995	0.000673994	0.00588725	860.878	619.845	399.562	1433.15	1251.86	1570.17	1051.3	1348.47	994.151	EFCAB11	down
gene12279	394.429	0.146759	0.2512	0.584233	0.559064	0.724026	439.427	433.335	392.084	490.203	405.424	450.028	314.887	337.718	286.759	TDP1	no
gene12281	3514.47	0.469284	0.647457	0.724811	0.468568	0.653308	5867.35	3186.45	3884.51	1821.57	1908.51	10081.3	1848.08	1657.34	1375.12	PSMC1	no
gene12282	522.47	0.732637	0.305145	2.40095	0.0163526	0.0647758	708.077	805.428	620.71	493.46	462.572	225.562	538.225	397.81	450.384	NRDE2	no
gene12284	11887.3	0.561885	0.321665	1.7468	0.0806718	0.201204	17977.6	12507.3	14947.2	8397.78	12570.3	16251.4	8212.21	8259.07	7863.13	CALM1	no
gene12287	1878.38	-0.922692	0.501353	-1.8404	0.065709	0.174784	1220.41	1735.2	572.634	3043.82	2793.76	605.512	2604.61	2079.19	2250.27	TTC7B	no
gene1229	7407.31	0.27591	0.537662	0.513166	0.607835	0.758468	9941.04	6806.23	8391.87	11759.2	3382.49	5036.81	4207.21	14184.2	2956.84	LOC105613042	no
gene12290	1586.12	-1.11254	0.574956	-1.935	0.0529907	0.150225	714.069	1227.63	739.296	2001.53	2155.43	244.176	2297.77	2064.77	2830.4	RPS6KA5	no
gene12291	2677.23	-0.116059	0.218926	-0.530127	0.596024	0.749589	2169.17	2601.87	2836.46	2981.12	2936.09	2039.91	2865.17	2514.26	3151.04	LOC101115969	no
gene12293	1864.66	-0.163732	0.345054	-0.47451	0.635136	0.780212	1517.02	1681.38	1980.72	1903	2106.91	862.828	1865.18	2581.56	2283.33	CTDSPL2	no
gene12294	2948.34	0.562162	0.249379	2.25425	0.0241806	0.086041	4324.36	2883.95	4061.86	2899.69	2982.46	1924.94	2880.26	2204.18	2373.4	EIF3J	no
gene12295	1839.37	0.247311	0.210864	1.17285	0.240857	0.42669	1734.74	2103.58	2327.93	2044.68	1468.59	1943.55	1776.65	1490.29	1664.36	SPG11	no
gene12296	37.1669	-0.345531	0.510729	-0.676544	0.498695	0.677932	41.9453	33.4048	19.2303	66.7718	42.052	12.0445	48.2894	36.0553	34.7085	PATL2	no
gene12298	17624.8	-0.460207	0.412367	-1.11601	0.264417	0.452973	14189.5	10941	17152.3	16579.8	18774.6	7889.18	19405.3	34162.4	19529.3	B2M	no
gene12299	4.51679	-1.2808	1.21449	-1.05459	0.291612	0.482434	4.99349	1.85582	0	1.62858	5.39128	0	9.05426	14.4221	3.30557	TRIM69	no
gene12300	3.20305	-3.68301	1.70329	-2.16229	0.0305958	0.101803	0.998698	0	0	0.814291	2.15651	13.1395	0	8.4129	3.30557	C7H15orf43	no
gene12302	59.556	0.666716	0.589965	1.1301	0.258436	0.44635	53.9297	115.989	67.3059	62.7004	64.6954	5.47479	55.3316	57.6885	52.8892	MB21D1	no
gene12303	341.701	-0.507148	0.212525	-2.38629	0.0170191	0.066687	228.702	318.274	253.198	398.188	404.346	303.304	373.237	400.214	395.842	MTO1	no
gene12304	17255.3	0.382581	0.270148	1.41619	0.15672	0.317335	20569.2	17669.3	23044.3	18288.2	17349.1	9679.44	16403.3	18651.4	13643.8	EEF1A1	no
gene12306	1394.02	-0.677869	0.311907	-2.17331	0.0297573	0.0996849	982.719	1018.85	986.085	1802.02	1771.58	754.427	1734.39	1747.48	1748.65	SLC17A5	no
gene12307	1168.37	-0.136232	0.424458	-0.320956	0.748244	0.85405	878.854	1042.05	1367.48	1375.34	1048.07	385.425	1439.63	1310.01	1668.49	CD109	no
gene1231	4952.57	0.381476	0.648021	0.588679	0.556077	0.721825	6634.35	5058.98	5887.66	5737.49	1927.92	521.2	4268.58	9017.43	5519.48	LOC101120378	no
gene12313	4650.27	0.58546	0.295468	1.98147	0.0475385	0.139144	4085.67	6780.25	7074.6	3722.12	5463.53	3099.83	3442.63	3420.45	4763.33	COL12A1	no
gene12314	881.23	-0.720418	0.457193	-1.57574	0.115085	0.256487	902.823	437.974	505.328	551.275	940.24	1719.09	617.702	1546.77	709.872	LOC101110066	no
gene12315	3334.21	-0.00805707	0.249673	-0.0322705	0.974256	0.988113	3126.92	2867.25	3971.05	2807.67	2886.49	3022.09	3198.17	4687.19	3441.1	TMEM30A	no
gene12316	2820.43	-0.870247	0.306984	-2.83483	0.00458506	0.0253808	1849.59	1892.94	1709.36	2594.33	4008.96	2016.91	2842.03	3918.01	4551.78	FILIP1	no
gene12317	7336.42	-1.31872	0.352134	-3.74494	0.00018044	0.0020686	3459.49	3865.68	3699.69	7208.1	10165.8	4580.21	8773.58	14591.6	9683.68	SENP6	down
gene1232	7275.98	-1.15906	0.990459	-1.17023	0.24191	0.427871	5707.56	2563.82	3708.23	15973.1	3040.68	74.4572	5881.25	25477.9	3056.83	LOC105614079	no
gene12320	3443.46	0.244998	0.404924	0.605049	0.545147	0.713601	3944.86	3040.77	4545.82	4134.15	3225.07	1078.53	3614.66	3450.49	3956.77	MYO6	no
gene12321	53.047	-0.952369	0.348105	-2.73587	0.00622159	0.0318028	42.944	31.549	23.5036	54.5575	49.5998	74.4572	82.4944	48.0737	70.2434	IMPG1	no
gene12325	177.26	1.06134	0.400877	2.64756	0.0081076	0.0387519	160.79	311.778	341.871	130.286	130.469	98.5463	216.296	133.405	71.8962	HTR1B	no
gene12327	186.376	-1.86852	0.548169	-3.40866	0.000652822	0.00576919	40.9466	115.989	44.8706	208.458	405.424	65.6975	203.218	268.011	324.773	MEI4	down
gene12328	253.138	0.115047	0.261522	0.439916	0.659998	0.796113	323.578	260.743	215.806	249.173	201.634	306.588	297.785	216.332	206.598	IRAK1BP1	no
gene12329	4438.74	-0.495455	0.457908	-1.082	0.279254	0.469327	3728.14	3577.1	3153.76	5605.58	5879.73	1191.32	5170.99	6834.88	4807.13	PHIP	no
gene1233	16638.2	1.30911	1.03925	1.25966	0.207792	0.386547	23679.1	21566.5	37616.5	13299.8	2823.95	16.4244	22762.4	16781.3	11197.6	LOC101120628	no
gene12330	1320.08	-0.0156167	0.229165	-0.0681461	0.945669	0.972407	1602.91	1010.5	1318.34	1403.02	1128.93	1513.23	1387.31	1391.73	1124.72	HMGN3	no
gene12333	113.861	-0.349663	0.666028	-0.524997	0.599585	0.752416	86.8867	113.205	88.6728	114.001	131.547	6.56975	151.91	179.075	152.883	LCA5	no
gene12334	821.311	-0.170099	0.476413	-0.35704	0.721062	0.835455	502.345	814.707	957.239	937.248	929.457	205.852	1047.28	1109.3	888.373	SH3BGRL2	no
gene12337	9728.14	0.76144	0.835849	0.910977	0.362307	0.555792	20493.3	5290.03	14382.1	9830.12	2612.62	295.639	13748.4	15657.6	5243.47	ELOVL4	no
gene12338	330.413	0.206779	0.294458	0.702237	0.482531	0.665744	315.589	394.363	378.195	385.159	395.72	198.188	244.465	365.36	296.675	TTK	no
gene12339	2796.97	-0.775198	0.478038	-1.62162	0.104884	0.24042	2577.64	1456.82	1657.01	2890.73	3018.04	892.391	4486.89	5106.63	3086.58	BCKDHB	no
gene1234	1219.22	0.877807	0.827972	1.06019	0.289059	0.479967	2288.02	1332.48	1633.5	400.631	587.65	3756.8	269.616	545.637	158.668	LOC101121219	no
gene12343	2542.72	-0.459745	0.300071	-1.53212	0.125492	0.272066	2151.2	1425.27	2525.57	2481.96	3762.04	2338.83	3038.21	1967.42	3194.01	FAM46A	no
gene12346	1535.81	-0.215595	0.232183	-0.928556	0.353119	0.547372	1227.4	1410.43	1522.4	1431.52	1706.88	1182.56	1567.39	2027.51	1746.17	IBTK	no
gene12348	575.402	0.59424	0.376532	1.5782	0.114521	0.25571	900.826	510.352	816.217	415.288	376.312	911.006	480.882	394.205	373.53	TPBG	no
gene12351	1007.77	-1.90512	0.491086	-3.8794	0.000104716	0.00135437	404.473	429.623	233.968	1313.45	1848.13	303.304	1452.71	1664.55	1419.74	UBE3D	down
gene12352	853.499	-0.327469	0.294154	-1.11325	0.265599	0.454253	563.266	836.049	789.509	1026.82	922.988	522.295	901.402	1082.86	1036.3	DOPEY1	no
gene12354	606.808	-0.829247	0.220312	-3.76396	0.000167244	0.00194366	390.491	460.244	348.281	573.261	658.815	825.599	769.612	633.371	801.602	PGM3	no
gene12355	60.6248	0.22381	0.310043	0.721868	0.470376	0.654625	68.9102	60.3143	71.5793	46.4146	73.3214	78.837	48.2894	51.6793	46.278	RWDD2A	no
gene12356	2781.52	-0.0425438	0.342579	-0.124187	0.901167	0.945967	2146.2	2150.9	3884.51	3501.45	3191.64	1674.19	2275.64	3615.14	2594.05	ME1	no
gene12359	26.6244	-0.475186	0.633909	-0.749612	0.453488	0.640866	18.9753	11.1349	33.1188	13.8429	19.4086	53.653	16.0965	57.6885	15.7015	PRSS35	no
gene12360	9.72774	-2.76841	0.867019	-3.19302	0.00140792	0.0104131	1.9974	1.85582	2.13669	16.2858	6.46954	6.56975	6.03617	28.8442	17.3543	SNAP91	no
gene12363	0.89305	-2.84983	3.18882	-0.893694	0.371486	0.564959	0	0	0	0	0	0	0	7.21106	0.826394	C8H6orf58	no
gene12365	9.58732	-0.302023	0.981369	-0.307757	0.758268	0.860661	5.99219	16.7024	2.13669	13.8429	3.23477	0	7.0422	21.6332	15.7015	SOGA3	no
gene12366	288.613	-1.60954	0.577592	-2.78664	0.00532574	0.0283072	112.853	157.745	95.0829	399.817	298.677	61.3177	287.724	484.343	699.955	KIAA0408	no
gene12367	3504.27	-0.146002	0.568167	-0.256971	0.797201	0.882422	2665.53	2484.95	4665.47	3810.07	3180.86	547.479	3979.85	6187.09	4017.1	ECHDC1	no
gene12369	873.289	-0.32415	0.307083	-1.05558	0.291162	0.481976	654.147	702.429	886.728	813.476	948.866	512.441	1069.41	1133.34	1138.77	RNF146	no
gene12370	139.927	0.474871	0.427216	1.11155	0.266332	0.455025	219.714	175.375	120.723	116.444	202.712	153.294	68.41	138.212	64.4587	RSPO3	no
gene12374	541.342	-0.973335	0.224822	-4.32936	1.5e-05	0.000283713	352.54	359.102	276.702	579.775	669.597	562.809	578.467	835.281	657.809	TRMT11	no
gene12375	357.091	0.552529	0.411993	1.34111	0.179884	0.350031	501.346	295.076	563.019	290.702	251.234	163.149	329.978	567.27	252.05	HINT3	no
gene12376	1205.57	-1.3256	0.497655	-2.66368	0.00772901	0.0374391	502.345	685.727	616.436	1388.37	1651.89	320.823	1371.22	2212.59	2100.69	NCOA7	no
gene12379	210.726	-0.43006	0.301042	-1.42857	0.153128	0.312587	165.784	173.52	174.141	171.815	264.173	145.63	274.646	223.543	303.286	HEY2	no
gene1238	268.67	0.577063	0.929158	0.621061	0.53456	0.705411	381.503	362.814	288.454	38.2717	90.5736	962.469	64.3859	203.111	26.4446	LOC101121728	no
gene12382	342.343	-0.122414	0.265068	-0.46182	0.644211	0.785923	372.514	350.751	245.72	278.487	351.512	324.108	403.418	457.902	296.675	TPD52L1	no
gene12383	903.755	-1.75747	0.625442	-2.80997	0.00495464	0.0268245	325.576	444.47	277.77	1079.75	1448.1	104.021	1089.53	1725.85	1638.74	RNF217	no
gene12385	215.319	-3.07204	0.548617	-5.59959	2.15e-08	1.12e-06	25.9662	69.5934	12.8202	198.687	528.346	151.104	262.574	368.966	319.814	NKAIN2	down
gene12386	230.125	-1.81337	0.560096	-3.23761	0.00120537	0.0092984	103.865	68.6655	85.4678	105.043	540.207	135.775	187.121	289.644	555.336	TRDN	down
gene1239	280.617	1.72601	0.824674	2.09296	0.0363524	0.114764	496.353	578.089	498.918	63.5147	36.6607	350.387	74.4461	409.828	17.3543	LOC101121986	no
gene12390	23.2006	0.338917	0.617472	0.548878	0.583089	0.740983	22.9701	49.1793	8.54678	21.1716	40.9737	8.75967	14.0844	21.6332	21.4862	CLVS2	no
gene12391	171.581	0.445083	0.255923	1.73913	0.0820125	0.203718	168.78	193.006	263.882	166.115	113.217	156.579	153.922	176.671	152.056	SMPDL3A	no
gene12393	249.982	1.79276	0.481641	3.72218	0.000197507	0.00223396	743.031	254.248	428.407	89.572	133.704	245.271	117.705	174.267	63.6323	FABP7	up
gene12394	862.766	0.287832	0.325596	0.884016	0.376687	0.569926	1101.56	660.673	1180.52	594.432	942.396	1051.16	592.551	1001.14	640.455	PKIB	no
gene12396	6777.66	-0.350097	0.28131	-1.24452	0.213307	0.39408	5402.96	4889.17	6894.05	5957.35	7608.18	5013.82	7136.77	10264.9	7831.73	SERINC1	no
gene12397	964.983	-0.792842	0.304253	-2.60586	0.00916428	0.0424242	643.162	643.971	658.102	1028.45	1133.25	713.913	854.119	1402.55	1607.34	HSF2	no
gene12399	1.35262	0.38137	1.47086	0.259285	0.795416	0.88116	2.99609	1.85582	0	1.62858	0	0	2.01206	1.20184	2.47918	LOC105615953	no
gene124	63.6297	-2.63625	0.509459	-5.17461	2.28e-07	8.33e-06	15.9792	14.8466	11.7518	75.729	116.452	33.9437	159.959	72.1106	71.8962	LOC106990793	down
gene1240	276.649	0.643786	0.887397	0.725477	0.46816	0.653121	526.314	179.087	386.742	339.559	87.3388	2.18992	428.568	289.644	250.397	C1H1orf68	no
gene12401	36171	0.445761	0.28761	1.54988	0.12117	0.265565	41300.2	38715.3	51867.2	36472.9	37975.1	40148.9	21895.2	34519.3	22644.8	GJA1	no
gene12402	644.111	-1.36451	0.472197	-2.8897	0.00385608	0.0222687	273.643	366.525	302.342	902.234	835.649	224.467	727.359	1445.82	718.962	TBC1D32	no
gene12403	841.434	1.31883	0.256557	5.14048	2.74e-07	9.67e-06	1643.86	1146.9	1412.36	654.69	671.754	654.785	475.852	487.948	424.766	LOC101122794	up
gene12405	592.209	-1.85366	0.616024	-3.00908	0.00262042	0.016753	87.8854	303.427	256.403	555.346	1040.52	114.971	812.871	1015.56	1142.9	MAN1A1	no
gene12406	115.998	-1.6356	0.482068	-3.39287	0.000691643	0.00600303	44.9414	61.2422	38.4605	120.515	62.5389	84.3118	263.58	163.451	204.946	FAM184A	down
gene12407	911.08	-0.54468	0.371542	-1.466	0.142648	0.297807	688.103	726.555	678.401	904.677	1080.41	420.464	979.872	1515.52	1205.71	MCM9	no
gene1241	1375.47	0.401815	0.406488	0.988503	0.322907	0.516777	1664.83	1437.34	1822.6	1908.7	572.554	759.901	1475.84	1681.38	1056.13	KPRP	no
gene12411	555.834	-1.41881	0.438414	-3.23622	0.00121122	0.00931928	262.658	276.518	248.925	486.946	788.206	236.511	671.021	985.511	1046.21	CEP85L	down
gene12416	278.198	-0.742673	0.521712	-1.42353	0.154582	0.314657	177.768	248.68	149.569	344.445	438.85	56.9379	359.152	331.709	396.669	SLC35F1	no
gene12419	1143.76	-0.104406	0.258652	-0.403656	0.686466	0.813678	850.891	1134.84	1282.02	1126.16	1339.19	814.649	1095.57	1437.4	1213.15	NUS1	no
gene12420	3.62415	-3.86777	1.37428	-2.8144	0.00488684	0.0265279	0.998698	0	0	4.07145	7.5478	5.47479	6.03617	6.00922	2.47918	LOC101102818	no
gene12421	1851.84	-0.0276338	0.357211	-0.0773599	0.938337	0.968779	1614.89	1888.3	1981.78	2063.41	2040.06	733.622	2036.2	2175.34	2132.92	GOPC	no
gene12422	1843.84	0.081371	0.220393	0.369209	0.711972	0.829334	1794.66	1876.24	2070.46	1977.1	2126.32	2025.67	1325.95	1788.34	1609.81	DCBLD1	no
gene12423	18.9702	-1.80142	0.645789	-2.78949	0.0052791	0.0281182	4.99349	12.9908	3.20504	22.8001	28.0347	6.56975	32.1929	38.459	21.4862	ROS1	no
gene12426	7.80207	-0.722647	0.889196	-0.812697	0.416392	0.606736	5.99219	10.207	0	8.14291	6.46954	18.6143	2.01206	7.21106	11.5695	RFX6	no
gene12428	100.207	-1.30453	0.431542	-3.02295	0.00250326	0.0161823	50.9336	62.1701	38.4605	106.672	79.791	251.841	90.5426	118.982	102.473	FAM162B	no
gene12429	138.208	-0.241654	0.552359	-0.437495	0.661753	0.796813	77.8985	161.457	130.338	158.787	138.017	22.9941	187.121	199.506	167.758	KPNA5	no
gene1243	24.8104	0.311476	0.563444	0.552807	0.580396	0.739094	29.9609	22.2699	33.1188	17.9144	12.9391	56.9379	22.1326	15.624	12.3959	LOC105605549	no
gene12430	604.717	-0.487647	0.203076	-2.40131	0.0163367	0.064756	489.362	525.198	415.587	622.932	679.302	630.696	555.328	783.602	740.449	ZUFSP	no
gene12431	1.07716	-2.06501	2.1423	-0.963924	0.335084	0.529121	0	0.927912	0	2.44287	0	0	3.01809	0	3.30557	RSPH4A	no
gene12432	1.4446	-2.48394	2.16465	-1.1475	0.251174	0.438751	0.998698	0	0	2.44287	7.5478	0	2.01206	0	0	LOC106991298	no
gene12433	0.892961	-2.86276	2.20831	-1.29636	0.194853	0.369758	0	0	0	1.62858	0	4.37984	0	1.20184	0.826394	LOC101104832	no
gene12434	451.333	-1.13895	0.310144	-3.67233	0.000240346	0.00262322	357.534	168.88	225.421	653.875	417.285	690.919	476.858	519.196	552.031	RWDD1	down
gene12435	1119.47	-0.239876	0.322918	-0.742841	0.457578	0.644469	1141.51	756.248	1099.33	1283.32	1086.88	1916.18	946.673	914.603	930.519	TRAPPC3L	no
gene12438	1372.99	-0.384323	0.290913	-1.32109	0.186471	0.359032	1007.69	1255.46	1159.16	1065.09	2292.37	1358.84	1300.8	1278.76	1638.74	DSE	no
gene12439	825.739	1.25453	0.21901	5.7282	1.02e-08	6.09e-07	1217.41	1184.02	1640.98	561.86	624.311	492.731	615.69	628.564	466.086	TSPYL1	up
gene1244	492.154	1.19262	0.645917	1.84639	0.0648351	0.173062	1146.51	375.804	839.721	323.273	127.234	117.161	557.34	781.198	161.147	LOC105613519	no
gene12440	1087.46	1.53013	0.23525	6.50425	7.81e-11	8.95e-09	1804.65	1717.57	2260.62	785.79	648.032	789.465	698.184	582.894	499.968	TSPYL4	up
gene12441	363.206	-0.298945	0.347041	-0.861412	0.389011	0.58164	273.643	369.309	301.274	372.945	411.894	209.137	394.363	618.949	317.335	NT5DC1	no
gene12443	33.7161	-1.6145	0.583746	-2.76575	0.00567912	0.0297142	5.99219	20.4141	16.0252	31.7573	95.9648	36.1336	29.1748	45.67	22.3126	FRK	no
gene12444	865.503	-0.775461	0.500787	-1.54848	0.121506	0.266054	741.034	483.442	536.31	706.804	847.51	2486.65	539.232	793.216	655.33	LOC101107200	no
gene1245	102.195	0.446304	0.706402	0.631798	0.527519	0.700282	167.781	57.5305	147.432	134.358	24.7999	14.2345	124.748	180.276	68.5907	LOC101122647	no
gene12451	73.0577	-1.87722	0.550732	-3.40859	0.000653005	0.00576919	40.9466	18.5582	19.2303	132.729	72.2432	38.3236	64.3859	195.9	75.2018	HS3ST5	down
gene12453	2144.89	0.269041	0.175964	1.52895	0.126276	0.27304	2383.89	2274.31	2599.29	2006.41	2320.41	2008.15	1749.48	2159.71	1802.36	HDAC2	no
gene12454	6006.07	0.874654	0.232152	3.76759	0.00016483	0.00192696	8933.36	7175.54	9744.4	4017.71	5685.65	4741.17	3751.48	5611.41	4393.93	MARCKS	no
gene12456	2.43549	-3.31387	1.61173	-2.05609	0.0397739	0.122156	0	0.927912	0	8.9572	4.31303	0	2.01206	2.40369	3.30557	RFPL4B	no
gene12459	3303.2	-0.619385	0.250869	-2.46895	0.0135508	0.0566202	1740.73	3110.36	2448.65	3148.86	4318.42	3944.04	3492.93	3313.48	4211.3	LAMA4	no
gene12461	398.76	-1.28145	0.479719	-2.67125	0.0075569	0.0368567	293.617	147.538	170.936	294.773	368.764	1016.12	279.676	640.582	376.835	FAM229B	no
gene12462	260.832	-0.583522	0.591998	-0.985683	0.324289	0.518103	112.853	281.157	193.371	394.117	318.086	38.3236	262.574	330.507	416.502	TUBE1	no
gene12463	42.9832	0.199448	0.581839	0.342789	0.731757	0.842707	35.9531	30.6211	74.7843	47.2289	64.6954	12.0445	68.41	19.2295	33.8821	WISP3	no
gene12464	3337.27	-0.334103	0.227384	-1.46933	0.141743	0.296357	2471.78	2743.84	3315.08	4176.5	3875.25	3328.67	3039.21	2868.8	4216.26	FYN	no
gene12466	938.069	-0.878855	0.457525	-1.92089	0.0547456	0.153873	602.215	637.476	565.156	1241.79	921.909	280.309	1421.52	1496.29	1275.95	TRAF3IP2	no
gene12468	2115.35	-0.947647	0.412412	-2.29782	0.0215721	0.0791318	932.784	1442.9	1543.76	2152.98	2945.8	997.507	2044.25	3259.4	3718.77	REV3L	no
gene12469	55.7935	0.520911	0.64711	0.80498	0.420831	0.610346	38.9492	84.44	86.5361	62.7004	46.365	3.28488	57.3437	58.8903	63.6323	KIAA1919	no
gene1247	7.46144	0.0910888	0.979583	0.0929873	0.925914	0.960868	6.99089	12.9908	3.20504	8.14291	9.70431	0	12.0723	13.2203	0.826394	SMCP	no
gene12470	551.729	-1.38502	0.432516	-3.20225	0.00136359	0.0101914	221.711	266.311	309.821	606.646	591.963	248.556	772.63	1206.65	741.275	SLC16A10	no
gene12471	334.005	-0.685772	0.268889	-2.55039	0.0107601	0.0477099	263.656	289.509	159.184	352.588	424.833	458.788	315.893	344.929	396.669	RPF2	no
gene12472	307.689	0.127421	0.300947	0.423402	0.672002	0.804402	269.649	308.067	400.63	296.402	376.312	168.624	312.875	331.709	304.939	GTF3C6	no
gene12473	2838.58	-0.380698	0.396836	-0.959333	0.337391	0.53101	1872.56	2580.52	2635.61	3218.89	3089.21	1086.2	3309.84	4331.44	3422.92	CDK19	no
gene12476	160.93	-1.29457	0.495021	-2.61517	0.00891821	0.041545	67.9115	150.322	26.7087	226.373	254.469	113.876	233.399	153.836	221.473	SLC22A16	no
gene12477	14.2934	-1.00603	0.543985	-1.84938	0.064403	0.172317	11.9844	8.35121	5.34174	12.2144	18.3304	13.1395	13.0784	15.624	30.5766	DDO	no
gene12478	107.463	-1.58083	0.705696	-2.2401	0.0250846	0.0884008	32.957	43.6119	61.9642	144.944	193.008	6.56975	139.838	221.139	123.133	METTL24	no
gene12479	261.178	-0.35331	0.358642	-0.985134	0.324558	0.51844	151.802	227.338	282.044	222.301	380.625	148.914	317.905	332.911	286.759	WASF1	no
gene1248	5045.95	0.797793	0.694167	1.14928	0.25044	0.437795	7785.85	6076.9	7255.15	3685.48	2802.39	13319.1	1837.01	1401.35	1250.33	IVL	no
gene12483	668.964	-0.624695	0.441885	-1.41371	0.157448	0.318593	377.508	623.557	473.278	908.748	850.744	209.137	890.336	819.657	867.713	FIG4	no
gene12484	18.0022	-1.3861	0.632366	-2.19192	0.0283853	0.0965371	1.9974	10.207	13.8885	13.8429	15.0956	13.1395	39.2351	24.0369	30.5766	AK9	no
gene12485	337.512	0.497335	0.277096	1.79482	0.0726831	0.187767	322.58	401.786	533.105	262.202	321.32	243.081	339.032	234.359	380.141	ZBTB24	no
gene12486	2083.3	1.13332	0.437518	2.59034	0.0095881	0.0437588	3645.25	3473.17	2689.03	1350.91	1137.56	3200.56	1429.57	822.061	1001.59	MICAL1	no
gene12488	201.611	-1.91067	0.379221	-5.03841	4.69e-07	1.52e-05	69.9089	101.142	41.6655	329.788	242.608	140.155	300.803	275.222	313.203	PPIL6	down
gene1249	557.71	1.08142	0.821408	1.31655	0.187989	0.361072	1192.45	578.089	809.807	504.046	202.712	14.2345	560.358	989.117	168.584	LOC106990801	no
gene12490	12465.4	-0.210707	0.302871	-0.695697	0.486619	0.669195	10045.9	9280.05	14522	11479.9	13596.8	8055.61	12347	17361.8	15499.8	CD164	no
gene12491	293.896	-1.31374	0.370307	-3.5477	0.000388611	0.00385098	159.792	171.664	111.108	244.287	473.355	227.751	301.809	566.068	389.231	LOC101108397	down
gene12493	814.061	-0.816346	0.412555	-1.97876	0.0478435	0.139738	653.149	507.568	459.389	925.848	1121.39	362.431	766.594	1546.77	983.408	CEP57L1	no
gene12494	2230.39	-0.561467	0.289497	-1.93945	0.0524461	0.149301	1638.86	1779.74	1661.28	2215.68	2618.01	1457.39	2340.02	3219.74	3142.77	SESN1	no
gene12495	343.109	-1.16161	0.319505	-3.63566	0.000277273	0.00293084	155.797	238.473	169.867	500.789	424.833	234.321	397.381	419.443	547.073	ARMC2	down
gene12496	571.618	0.876389	0.329247	2.6618	0.0077724	0.0375878	613.201	809.139	1040.57	561.046	451.789	237.606	499.996	399.012	532.197	FOXO3	no
gene12497	592.727	-1.56513	0.523729	-2.98843	0.00280415	0.0175105	284.629	308.995	177.346	742.633	943.474	144.535	679.07	1175.4	878.456	LACE1	no
gene12498	2741.43	0.709022	0.2415	2.93591	0.00332566	0.0199046	3627.27	3350.69	4118.48	2271.87	2827.19	1622.73	1990.93	2683.72	2180.03	SNX3	no
gene1250	2365.74	2.03369	0.695012	2.92613	0.00343206	0.0204245	5567.74	3368.32	5368.45	1804.47	477.668	127.015	1838.01	2128.46	611.531	SPRR4	no
gene12500	41.7628	-1.3248	0.343603	-3.85562	0.000115437	0.00145386	21.9714	20.4141	20.2986	48.0431	57.1476	37.2286	59.3557	44.4682	66.9379	NR2E1	down
gene12504	838.155	-0.428152	0.265184	-1.61455	0.106408	0.242942	650.153	562.315	831.174	714.947	908.97	810.27	804.823	1271.55	989.193	OSTM1	no
gene12505	3470.34	-0.025381	0.244452	-0.103828	0.917306	0.95598	3120.93	3269.96	3898.4	3468.88	4313.03	2370.59	3345.05	4024.97	3421.27	SEC63	no
gene12507	139.368	-1.07865	0.468279	-2.30344	0.021254	0.0783104	92.8789	71.4492	75.8527	134.358	174.678	49.2731	161.971	221.139	272.71	SCML4	no
gene12508	234.529	-0.416838	0.297312	-1.40202	0.160909	0.323776	217.716	189.294	167.731	192.173	351.512	183.953	231.387	323.296	253.703	SOBP	no
gene12509	1185.99	-1.0744	0.445786	-2.41013	0.015947	0.0636946	729.05	708.925	610.026	1669.3	1920.37	412.799	1186.11	2067.17	1370.16	PDSS2	no
gene1251	16402	1.60684	0.499722	3.21547	0.00130233	0.00985379	33336.5	22311.6	33458.5	7714.59	5826.9	20742.9	8157.89	12388.6	3680.76	LOC101102105	up
gene12511	115.663	0.19646	0.368557	0.533053	0.593997	0.74795	93.8776	163.313	121.792	131.101	148.799	56.9379	108.651	132.203	84.2921	BEND3	no
gene12512	243.325	-0.0476036	0.316897	-0.150218	0.880593	0.935392	272.645	183.727	257.472	227.187	276.034	382.141	194.164	213.928	182.633	C8H6orf203	no
gene12515	5738.67	-0.184181	0.287846	-0.639861	0.522263	0.696272	6496.53	4608.94	4677.23	5524.96	7689.05	6983.65	4185.08	6991.12	4491.45	CD24	no
gene12518	527.037	-0.275354	0.195653	-1.40736	0.15932	0.321136	399.479	500.145	487.166	616.418	524.033	548.574	463.779	615.344	588.392	QRSL1	no
gene12519	1105.64	-0.543571	0.262262	-2.07262	0.0382074	0.118492	949.762	864.814	726.476	1303.68	1120.31	1422.35	1068.4	1627.3	867.713	RTN4IP1	no
gene12520	7061.1	0.377934	0.272527	1.38678	0.16551	0.33009	7083.77	7345.35	10600.1	8769.09	6235.56	4707.23	6097.54	7114.91	5596.34	AIM1	no
gene12521	1540.17	-0.307764	0.291924	-1.05426	0.291763	0.482594	1215.42	1396.51	1376.03	1564.25	1934.39	1011.74	1484.9	2354.41	1523.87	ATG5	no
gene12525	2465.76	0.605698	0.297097	2.03872	0.0414779	0.126016	2992.1	2888.59	3708.23	2335.39	1713.35	1335.85	2139.82	3069.51	2008.96	PRDM1	no
gene12527	1753.74	0.246979	0.347444	0.710845	0.47718	0.661012	2151.2	1846.54	1880.29	1943.71	1730.6	688.729	1631.78	1937.37	1973.43	PREP	no
gene12529	20.3234	-2.96941	0.664633	-4.46775	7.9e-06	0.00016437	1.9974	3.71165	5.34174	37.4574	16.1738	24.0891	54.3256	21.6332	18.1807	POPDC3	down
gene12530	21.546	-0.437897	0.539403	-0.811819	0.416896	0.607121	6.99089	25.0536	20.2986	33.3859	23.7216	8.75967	30.1809	24.0369	21.4862	BVES	no
gene12531	5.9936	-5.60509	1.53128	-3.66038	0.00025184	0.00271205	0	0	0	3.25716	10.7826	27.374	2.01206	7.21106	3.30557	LIN28B	down
gene12532	1325.82	-0.533106	0.355804	-1.49832	0.134051	0.285087	895.832	1154.32	1013.86	1468.98	1603.37	674.495	1445.66	2261.87	1413.96	HACE1	no
gene12537	142.454	-0.733864	0.394087	-1.86219	0.0625767	0.168855	135.823	54.7468	105.766	107.486	131.547	158.769	137.826	258.396	191.723	GRIK2	no
gene12540	6.37044	-1.00144	1.02725	-0.974869	0.329625	0.523568	2.99609	8.35121	0	8.14291	12.9391	0	9.05426	8.4129	7.43754	LOC105615865	no
gene12541	2594.75	-0.383713	0.360977	-1.06299	0.287788	0.47856	2002.39	2127.7	2339.68	2810.93	4041.31	1587.69	1930.57	4167.99	2344.48	ASCC3	no
gene12544	2.9376	-4.58799	1.57686	-2.90958	0.00361917	0.0212101	0	0	0	0.814291	2.15651	8.75967	2.01206	3.60553	9.09033	SIM1	no
gene12547	0.245319	-0.956939	3.53382	-0.270795	0.786549	0.875488	0	0	0	0	0	0	1.00603	1.20184	0	MCHR2	no
gene12548	0.324908	2.41796	3.43648	0.703616	0.481672	0.664972	0	1.85582	1.06835	0	0	0	0	0	0	PRDM13	no
gene12549	2148.74	-0.519089	0.340368	-1.52508	0.127239	0.274745	1642.86	1523.63	1835.42	2093.54	2421.76	1517.61	1750.49	4076.65	2476.7	CCNC	no
gene1255	125.51	-0.101073	0.538665	-0.187635	0.851163	0.91678	190.751	57.5305	111.108	210.901	135.86	32.8488	134.808	144.221	111.563	LOC101121654	no
gene12550	228.726	-0.0927669	0.445073	-0.208431	0.834893	0.906402	315.589	159.601	181.619	189.73	152.034	457.693	149.898	278.828	173.543	TSTD3	no
gene12551	197.679	-0.442235	0.59435	-0.744066	0.456837	0.64385	103.865	192.078	182.687	212.53	223.199	33.9437	129.778	347.333	353.696	USP45	no
gene12552	8729.34	-0.908714	0.441703	-2.0573	0.0396576	0.121904	7709.95	5481.18	3332.18	11490.5	12235	3294.73	11637.7	10798.6	12584.3	PNISR	no
gene12553	739.301	-0.565925	0.196601	-2.87855	0.00399504	0.022863	613.201	575.305	491.44	811.033	733.214	931.81	928.565	703.078	866.06	COQ3	no
gene12554	647.415	-0.484857	0.395021	-1.22742	0.219665	0.402187	498.35	541.901	493.577	840.348	809.771	237.606	838.022	871.336	695.823	FAXC	no
gene12555	577.693	-0.253381	0.282943	-0.895519	0.37051	0.564087	425.445	565.098	545.926	711.69	670.676	354.767	643.859	709.087	572.691	FBXL4	no
gene12559	703.343	-0.642145	0.41459	-1.54887	0.121414	0.265886	430.439	652.322	452.979	889.205	1128.93	298.924	697.178	1103.29	676.816	MMS22L	no
gene12560	1019.7	-0.248586	0.178638	-1.39156	0.164055	0.328221	1017.67	755.32	945.487	1092.78	1121.39	1127.81	1106.63	1051.61	958.616	KLHL32	no
gene12562	306.743	-0.747591	0.218817	-3.41651	0.000634301	0.00564607	236.691	187.438	209.396	279.302	382.781	379.951	330.984	340.122	414.023	NDUFAF4	no
gene12563	528.215	-0.153989	0.310564	-0.495837	0.62001	0.767577	473.383	577.161	423.066	447.86	823.788	365.716	448.689	614.142	580.128	GPR63	no
gene12564	164.169	-1.5475	0.33946	-4.5587	5.15e-06	0.000115551	49.9349	76.0888	89.7412	148.201	308.381	246.366	160.965	199.506	198.334	FHL5	down
gene12565	1353.73	-0.212465	0.450995	-0.471102	0.637568	0.781847	1214.42	1101.43	1356.8	1389.18	1739.23	386.52	1377.25	2211.39	1407.35	UFL1	no
gene12568	2.72204	-4.45843	1.67156	-2.66722	0.00764814	0.0371894	0	0	0	1.62858	4.31303	7.66471	0	8.4129	2.47918	FUT9	no
gene12569	3.19378	-4.69954	1.70903	-2.74982	0.0059628	0.0307902	0	0	0	0	3.23477	9.85463	1.00603	7.21106	7.43754	LOC101106531	no
gene12574	586.409	-0.26855	0.45766	-0.586789	0.557345	0.722697	401.477	436.119	710.451	420.174	677.145	216.802	644.865	1035.99	734.664	MANEA	no
gene12579	210.284	-1.03185	0.621903	-1.65918	0.0970786	0.227861	107.859	127.124	136.748	212.53	274.955	36.1336	264.586	578.086	154.536	EPHA7	no
gene1258	79.1241	-5.86716	1.69181	-3.46798	0.000524387	0.00488822	2.99609	0.927912	2.13669	120.515	22.6434	0	119.717	439.875	3.30557	LOC105615728	down
gene12584	0.468183	2.02563	2.76927	0.731467	0.464494	0.649845	0.998698	0	2.13669	0	1.07826	0	0	0	0	LOC101107795	no
gene12586	1821.15	-0.136669	0.248115	-0.55083	0.58175	0.739917	1364.22	1733.34	2026.66	1920.1	1969.97	1280.01	1880.27	2186.15	2029.62	MAP3K7	no
gene12590	1416.7	-0.344905	0.603802	-0.571222	0.567849	0.729577	1336.26	1310.21	955.103	1768.64	1384.48	163.149	1900.39	2600.79	1331.32	BACH2	no
gene12591	24.0072	-0.901897	0.874507	-1.03132	0.302391	0.494693	8.98828	19.4862	17.0936	11.4001	30.1912	0	28.1688	55.2848	45.4516	GJA10	no
gene12592	1056.23	-0.355611	0.452661	-0.785599	0.432102	0.620481	886.844	889.868	894.207	1226.32	1479.37	289.069	1136.81	1591.24	1112.33	CASP8AP2	no
gene12593	1121.14	-0.0567487	0.250983	-0.226106	0.821119	0.898425	900.826	1396.51	978.606	1356.61	1225.98	869.397	1244.46	978.3	1139.6	MDN1	no
gene12594	293.928	-0.578722	0.406477	-1.42375	0.154519	0.314648	291.62	170.736	200.849	276.044	222.121	324.108	219.314	640.582	299.981	LYRM2	no
gene12595	585.566	-1.02571	0.566973	-1.8091	0.0704357	0.184375	280.634	374.876	383.537	838.719	793.597	95.2614	747.48	1147.76	608.226	ANKRD6	no
gene12599	127.549	-0.349993	0.483801	-0.723423	0.46942	0.653931	96.8737	68.6655	158.115	140.058	222.121	40.5135	151.91	135.808	133.876	RRAGD	no
gene126	1.27649	-2.30807	1.83914	-1.25498	0.209487	0.388976	0	0.927912	0	2.44287	3.23477	0	0	2.40369	2.47918	C1H1orf94	no
gene12600	1510.33	-0.115711	0.215662	-0.536539	0.591586	0.746545	1185.45	1334.34	1772.39	1301.24	1755.4	1473.81	1468.8	1614.08	1687.5	UBE2J1	no
gene12601	18.1009	0.130707	0.914591	0.142913	0.886359	0.939083	23.9688	31.549	2.13669	24.4287	22.6434	0	14.0844	16.8258	27.271	GABRR2	no
gene12602	7.40258	1.23404	0.742738	1.66147	0.0966193	0.227133	9.98698	12.9908	12.8202	2.44287	15.0956	4.37984	4.02412	2.40369	2.47918	GABRR1	no
gene12603	238.122	0.0881903	0.387215	0.227755	0.819836	0.897685	126.835	244.969	371.785	228.816	292.208	211.327	221.326	302.864	142.966	PM20D2	no
gene12604	73.8578	-0.155592	0.484233	-0.321316	0.747971	0.853904	46.9388	85.3679	73.716	57.0003	79.791	26.279	62.3738	98.5511	134.702	SRSF12	no
gene12605	1428.3	1.00674	0.385107	2.61418	0.00894418	0.0416332	2430.83	1766.74	2244.6	1049.62	1095.51	435.794	1342.04	1588.84	900.769	PNRC1	no
gene12607	1557.16	-0.898403	0.396016	-2.2686	0.0232927	0.0835451	1033.65	1059.68	870.703	1896.48	2223.37	647.121	1726.35	2606.8	1950.29	RNGTT	no
gene12608	14.5706	-0.331136	0.829575	-0.399163	0.689773	0.815784	17.9766	5.56747	13.8885	16.2858	12.9391	0	11.0663	22.835	30.5766	CNR1	no
gene12609	0.952033	-0.818146	1.73134	-0.47255	0.636534	0.781173	0	1.85582	0	1.62858	2.15651	1.09496	1.00603	0	0.826394	SPACA1	no
gene12612	963.245	0.0595923	0.222705	0.267584	0.78902	0.876919	1031.66	1051.32	886.728	939.691	1081.49	663.545	1042.25	1015.56	956.964	AKIRIN2	no
gene12613	746.209	-0.56484	0.188145	-3.00215	0.00268077	0.0169978	528.311	598.503	569.429	908.748	774.188	895.676	738.425	966.282	736.317	ORC3	no
gene12614	934.844	-0.551248	0.271466	-2.03063	0.0422923	0.127747	636.171	775.734	728.613	1306.94	1117.07	649.311	987.92	1249.92	961.922	RARS2	no
gene12615	1283.23	-0.662753	0.375082	-1.76696	0.0772356	0.195266	968.737	967.812	835.448	1546.34	1651.89	548.574	1604.62	1979.44	1446.19	SLC35A1	no
gene12616	34.8782	-1.07628	0.401061	-2.68358	0.00728384	0.03583	14.9805	25.9815	19.2303	41.5288	23.7216	41.6084	43.2592	43.2663	60.3267	CFAP206	no
gene12617	2.35947	-1.14394	1.25132	-0.914193	0.360616	0.554446	0	1.85582	2.13669	4.88574	2.15651	0	2.01206	2.40369	5.78475	C8H6orf163	no
gene12618	208.079	-0.465894	0.45952	-1.01387	0.310644	0.503184	181.763	165.168	150.637	174.258	191.93	497.111	250.501	124.992	136.355	SMIM8	no
gene12619	11.6195	-1.69514	0.700794	-2.41889	0.0155681	0.0626039	6.99089	2.78374	4.27339	13.8429	11.8608	3.28488	26.1568	18.0276	17.3543	GJB7	no
gene1262	1.47034	2.02549	1.51424	1.33763	0.181018	0.351622	2.99609	1.85582	4.27339	1.62858	0	0	0	0	2.47918	LELP1	no
gene12620	2457.12	-0.690422	0.487301	-1.41683	0.156533	0.317174	1906.51	1780.66	1543.76	2937.96	3576.58	589.088	2757.53	4061.03	2960.97	ZNF292	no
gene12621	0.913616	-2.89736	3.11413	-0.930394	0.352167	0.546325	0	0	0	0	0	6.56975	0	0	1.65279	LOC101114528	no
gene12623	2.10086	-3.06519	1.59143	-1.92606	0.0540967	0.152557	0	0.927912	0	2.44287	5.39128	5.47479	3.01809	0	1.65279	CGA	no
gene12624	15.4121	-2.68366	0.651192	-4.12115	3.77e-05	0.000597813	0.998698	3.71165	5.34174	17.9144	38.8172	18.6143	17.1025	18.0276	18.1807	HTR1E	down
gene12627	6707.42	0.0521797	0.198803	0.262469	0.79296	0.879647	6272.82	6670.76	7666.46	6403.58	7621.12	6417.55	5332.96	7662.95	6318.6	SYNCRIP	no
gene12628	2078.89	-0.288457	0.26478	-1.08942	0.275968	0.465929	1624.88	1719.42	2090.76	2082.96	2136.03	1507.76	1985.9	2660.88	2901.47	SNX14	no
gene12629	468.878	0.369982	0.285547	1.2957	0.19508	0.369873	343.552	699.646	613.231	460.074	320.242	485.067	438.629	433.865	425.593	NT5E	no
gene1263	79023.6	0.0226584	0.584288	0.0387796	0.969066	0.985719	94560.7	63417.2	81581.1	74634.6	57024.7	222594	39639.6	38568.3	39191.7	PRR9	no
gene12634	422.478	0.0989845	0.463418	0.213596	0.830862	0.903739	411.464	530.766	383.537	277.673	607.058	132.49	360.158	642.986	456.169	TBX18	no
gene12635	1144.33	-0.350972	0.464962	-0.754841	0.450344	0.637841	1072.6	918.633	909.164	1201.08	1661.59	292.354	1472.83	1584.03	1186.7	CEP162	no
gene12636	4.97796	-0.592002	0.990223	-0.597847	0.549942	0.717287	5.99219	0.927912	4.27339	8.9572	4.31303	0	7.0422	10.8166	2.47918	MRAP2	no
gene12637	695.133	-1.17448	0.445992	-2.63341	0.00845333	0.0399453	380.504	418.488	335.461	841.976	1002.78	246.366	735.407	1331.64	963.575	LOC101117851	no
gene12638	2.16364	0.476728	1.25372	0.38025	0.70376	0.824168	4.99349	0.927912	2.13669	3.25716	4.31303	0	3.01809	0	0.826394	RIPPLY2	no
gene12639	3528.43	-2.39383	0.760462	-3.14786	0.00164473	0.0117392	1549.98	646.755	561.951	2351.67	14409.8	686.539	5003.99	4915.54	1629.65	LOC101116409	no
gene1264	140.774	0.871984	0.485404	1.79641	0.0724298	0.187493	204.733	187.438	213.669	203.573	88.417	41.6084	172.031	87.7345	67.7643	LOC101121908	no
gene12640	173.747	-0.77865	0.735693	-1.05839	0.289878	0.48073	145.81	186.51	20.2986	70.029	287.894	113.876	417.502	265.607	56.1948	LOC101116661	no
gene12641	32.0192	-2.7062	0.78264	-3.45778	0.000544647	0.00502173	9.98698	9.27912	1.06835	34.2002	38.8172	9.85463	34.205	120.184	30.5766	THEMIS	down
gene12642	3579.87	-0.975554	0.516543	-1.88862	0.0589427	0.161778	2134.22	2280.81	2116.4	3643.95	4677.48	890.201	4096.55	8070.38	4308.82	PTPRK	no
gene12648	3014.94	-0.670362	0.503928	-1.33027	0.183428	0.354635	1827.62	2900.65	1758.5	3452.59	4783.15	718.293	3270.6	4919.14	3503.91	LAMA2	no
gene1265	284.061	-0.239199	0.53248	-0.449217	0.653275	0.791992	313.591	200.429	246.788	529.289	184.382	97.4513	378.267	454.297	152.056	PGLYRP4	no
gene12650	1368.78	-0.868591	0.235371	-3.69031	0.000223982	0.00247509	838.906	769.239	1040.57	1426.64	1659.44	1310.67	1449.69	1717.43	2106.48	ARHGAP18	no
gene12652	78.3933	-1.01608	0.53319	-1.90566	0.0566949	0.157581	34.9544	71.4492	33.1188	61.0718	86.2605	32.8488	113.681	188.689	83.4657	TMEM244	no
gene12654	469.137	-0.307422	0.300984	-1.02139	0.307069	0.499307	369.518	405.498	440.159	477.989	572.554	274.835	454.725	599.72	627.233	L3MBTL3	no
gene12655	13.2448	-1.14284	0.577391	-1.97931	0.0477808	0.139601	5.99219	8.35121	7.47843	13.0286	18.3304	28.4689	10.0603	19.2295	8.26394	SAMD3	no
gene12656	109.819	-1.83037	0.430331	-4.25341	2.11e-05	0.00037276	29.9609	41.756	50.2123	90.3863	232.903	142.345	103.621	88.9364	208.251	TMEM200A	down
gene12658	2.98371	-4.60528	1.62565	-2.83289	0.00461287	0.0255188	0	0	0	4.07145	2.15651	0	4.02412	10.8166	5.78475	SMLR1	no
gene12659	1737.58	-0.607503	0.279677	-2.17216	0.0298435	0.0998796	955.754	1508.78	1399.54	1679.88	2260.03	1424.54	2047.27	1753.49	2608.92	EPB41L2	no
gene12663	359.693	-0.74708	0.402688	-1.85523	0.0635629	0.170738	230.699	264.455	247.857	321.645	516.485	147.819	471.828	508.38	528.065	AKAP7	no
gene12666	126.9	-1.7475	0.799346	-2.18616	0.0288036	0.0974476	69.9089	19.4862	58.7591	89.572	63.6171	12.0445	321.929	164.652	342.127	ARG1	no
gene12667	703.108	0.160842	0.281681	0.571007	0.567995	0.729633	617.195	725.627	926.257	681.561	683.615	420.464	649.895	858.116	765.24	MED23	no
gene12668	816.504	-0.378296	0.799427	-0.473209	0.636064	0.780758	1046.64	258.887	736.091	1083.82	353.668	32.8488	1365.18	1221.07	1250.33	ENPP3	no
gene12669	1072.67	-0.734791	0.308375	-2.38279	0.0171821	0.0671772	625.185	756.248	849.336	1060.21	1081.49	1600.83	1054.32	836.483	1789.97	ENPP1	no
gene1267	262.754	-0.810315	0.880129	-0.920678	0.357219	0.551177	278.637	133.619	112.176	143.315	76.5562	240.891	143.862	1201.84	33.8821	S100A9	no
gene12670	2184.45	0.50632	0.31022	1.63214	0.102651	0.2367	2221.1	2365.25	3577.9	1608.22	2372.16	2783.39	1625.74	1465.05	1641.22	CTGF	no
gene12673	862.43	0.0617535	0.343499	0.179778	0.857327	0.920683	678.116	758.104	1225.39	880.248	544.52	822.314	1127.76	1121.32	604.094	MOXD1	no
gene12674	5.15011	-2.00925	1.07352	-1.87164	0.0612566	0.166304	0	0.927912	4.27339	0.814291	9.70431	9.85463	4.02412	6.00922	10.7431	LOC105615893	no
gene12675	2265.27	-0.42364	0.23927	-1.77055	0.0766354	0.194252	1901.52	1607.14	2027.72	2512.09	2308.55	1682.95	2832.98	2909.66	2604.79	STX7	no
gene12684	0.554832	3.18735	3.39358	0.93923	0.347613	0.541578	4.99349	0	0	0	0	0	0	0	0	LOC101103241	no
gene12685	0.342554	0.00484668	3.09503	0.00156596	0.998751	0.999356	0.998698	0	0	0	1.07826	0	1.00603	0	0	LOC101119225	no
gene12687	0.447124	-1.87026	3.50887	-0.533008	0.594028	0.74795	0	0	0	0	0	0	4.02412	0	0	LOC101103730	no
gene12693	8.84159	0.230697	0.68647	0.336062	0.736824	0.846292	3.99479	8.35121	17.0936	3.25716	10.7826	8.75967	15.0904	4.80737	7.43754	TAAR1	no
gene12694	263.531	0.160784	0.927191	0.17341	0.862329	0.923765	784.977	33.4048	32.0504	82.2433	135.86	292.354	545.268	80.5235	385.099	VNN1	no
gene12696	258.194	-1.739	0.403724	-4.30741	1.65e-05	0.000306506	76.8998	72.3771	153.842	322.459	260.938	431.414	190.139	301.663	514.017	VNN2	down
gene12697	779.184	-1.29792	0.354319	-3.66312	0.000249158	0.00269133	346.548	538.189	300.206	954.349	939.161	490.542	1080.48	996.328	1366.85	SLC18B1	down
gene12698	6044.78	-1.21014	0.522367	-2.31665	0.0205226	0.0761472	4741.82	2789.3	2136.69	13453.7	6016.67	12004	3211.24	6795.22	3254.34	RPS12	no
gene12699	53.3188	0.127364	0.464295	0.274317	0.783841	0.875488	50.9336	92.7912	25.6403	78.1719	62.5389	32.8488	51.3075	49.2756	36.3613	EYA4	no
gene12700	0.327116	0.00484656	3.13483	0.00154604	0.998766	0.999356	0	0.927912	0	0.814291	0	0	0	1.20184	0	TCF21	no
gene12701	781.036	-0.460777	0.174902	-2.63448	0.00842663	0.0398721	588.233	704.285	580.113	807.776	834.571	790.56	851.101	984.309	888.373	TBPL1	no
gene12702	400.625	-0.23362	0.436041	-0.535776	0.592114	0.746773	365.524	383.228	326.914	480.431	337.494	155.484	615.69	644.188	296.675	SLC2A12	no
gene12703	1626.38	-0.0653375	0.50307	-0.129878	0.896663	0.943582	1288.32	1686.02	1758.5	1578.91	1781.28	354.767	1588.52	2890.43	1710.63	SGK1	no
gene12708	9.66145	-0.533213	0.94584	-0.563745	0.572928	0.733001	9.98698	11.1349	1.06835	4.88574	3.23477	1.09496	19.1146	24.0369	12.3959	ALDH8A1	no
gene12709	1452.59	-0.968172	0.272026	-3.55912	0.000372098	0.00373107	767.999	953.893	939.077	1477.94	1924.69	2043.19	1069.41	1912.13	1985	HBS1L	no
gene12710	315.347	-0.413415	0.529424	-0.780878	0.434874	0.623179	214.72	273.734	286.317	406.331	441.007	53.653	431.586	360.553	370.224	MYB	no
gene12711	1970.37	-1.3672	0.549264	-2.48914	0.0128051	0.0542446	1068.61	1040.19	770.278	2446.13	2770.04	354.767	2549.28	3086.33	3647.7	AHI1	no
gene12714	1268.26	-2.47302	0.510154	-4.8476	1.25e-06	3.46e-05	308.598	418.488	215.806	1598.45	2261.1	421.559	1389.33	1853.24	2947.75	PDE7B	down
gene12716	137.771	0.366764	0.331144	1.10757	0.268049	0.456793	170.777	155.889	159.184	109.929	141.252	205.852	113.681	81.7253	101.646	MTFR2	no
gene12717	4239.12	-0.15886	0.245453	-0.647209	0.517497	0.69266	3661.23	3715.36	4425.1	4021.78	4844.61	3086.69	3877.24	5246.04	5274.04	BCLAF1	no
gene12719	2840.7	-0.432817	0.390033	-1.10969	0.267131	0.455863	2115.24	2425.56	2369.59	3681.41	3358.77	1130	2577.45	4141.55	3766.7	MAP7	no
gene12722	2536.45	-0.696125	0.473412	-1.47044	0.141442	0.295881	1700.78	2278.95	1403.81	3241.69	3530.21	682.159	2737.4	3729.32	3523.74	MAP3K5	no
gene12723	1153.82	-0.360632	0.171624	-2.10128	0.035616	0.112968	999.697	944.614	965.786	1296.35	1185	1202.26	1155.93	1492.69	1142.08	PEX7	no
gene12724	94.1423	3.97792	0.801105	4.96554	6.85e-07	2.11e-05	257.664	193.934	300.206	13.0286	49.5998	0	16.0965	6.00922	10.7431	SLC35D3	up
gene12725	1140.37	-0.00863978	0.559387	-0.0154451	0.987677	0.995921	1382.2	968.74	1056.6	1291.46	555.302	231.036	1938.62	1660.95	1178.44	IL20RA	no
gene12727	79.1878	-1.89251	1.00167	-1.88936	0.0588442	0.161658	42.944	21.342	20.2986	122.958	26.9564	0	240.441	165.854	71.8962	IL22RA2	no
gene12728	1587.43	-1.08003	0.265449	-4.0687	4.73e-05	0.000720622	758.012	836.049	1138.86	1639.98	1720.9	2693.6	1721.32	1660.95	2117.22	IFNGR1	down
gene12733	267.721	0.0107678	0.333112	0.0323248	0.974213	0.988113	228.702	244.041	334.393	171.815	237.216	190.523	282.694	371.369	348.738	TNFAIP3	no
gene12735	42787.4	0.768764	0.289603	2.65455	0.00794146	0.0381147	58290	48103.9	70751.3	34720.5	33958.6	25492.8	32323.7	52709.2	28736.2	PERP	no
gene12736	1538.25	-1.31871	0.56892	-2.31791	0.0204541	0.0759618	817.934	647.683	846.131	1854.95	1959.19	234.321	2467.79	2576.75	2439.51	ARFGEF3	no
gene12737	2863.58	0.356393	0.316664	1.12546	0.260394	0.448559	4220.5	2329.06	3508.45	2253.14	2157.59	3463.35	2422.52	3533.42	1884.18	HEBP2	no
gene12738	1548.1	-0.439329	0.395218	-1.11161	0.266305	0.455023	1288.32	1154.32	1310.86	1866.35	1565.63	635.076	2131.78	2517.86	1462.72	NHSL1	no
gene12739	461.25	-0.587254	0.291017	-2.01794	0.0435977	0.13058	437.43	283.941	315.162	523.589	410.816	371.191	569.412	719.904	519.802	CCDC28A	no
gene12741	80.0312	-1.10903	0.507339	-2.18597	0.0288178	0.0974476	37.9505	55.6747	41.6655	52.1146	167.13	53.653	50.3014	163.451	98.3408	ECT2L	no
gene12742	2593.07	-0.335102	0.272791	-1.22842	0.219288	0.401702	1976.42	2400.51	2247.8	3591.84	2549	1797.92	2381.27	3306.27	3086.58	REPS1	no
gene12743	1631.1	-0.592879	0.377688	-1.56976	0.116471	0.258439	1389.19	1141.33	1123.9	1040.66	1904.2	2618.05	1131.78	2787.07	1543.7	ABRACL	no
gene12744	1632.22	0.432663	0.241835	1.78908	0.0736014	0.189208	1497.05	1773.24	2649.5	1618.81	1369.39	1270.15	1420.51	1493.89	1597.42	HECA	no
gene12745	85.9683	-1.21346	0.605569	-2.00383	0.045088	0.133847	51.9323	50.1072	35.2555	143.315	127.234	13.1395	70.422	115.377	166.931	TXLNB	no
gene12746	1488.71	1.38061	0.262338	5.26272	1.42e-07	5.61e-06	2336.95	2161.11	3078.98	841.162	1082.57	748.952	1071.42	1273.95	803.254	CITED2	up
gene1275	172.237	-1.73307	0.780362	-2.22085	0.026361	0.0915159	90.8815	38.0444	73.716	57.8146	87.3388	819.029	83.5004	163.451	136.355	S100A5	no
gene12751	0.370949	1.4693	3.47576	0.422728	0.672494	0.804402	0	0	2.13669	0	0	0	0	1.20184	0	NMBR	no
gene12752	1433.54	-0.393115	0.308753	-1.27324	0.202934	0.380018	1149.5	1149.68	1258.51	1626.95	1634.64	875.967	1253.51	2210.19	1742.86	VTA1	no
gene12753	1463.65	-0.24595	0.385943	-0.63727	0.523949	0.697591	945.767	1308.36	1652.73	1551.22	2219.05	643.836	1664.98	1805.17	1381.73	ADGRG6	no
gene12754	3158.72	-1.52254	0.551795	-2.75925	0.00579344	0.0301524	1186.45	1736.12	1291.63	3867.07	3729.69	713.913	3456.72	4612.67	7834.21	HIVEP2	no
gene12756	1299.49	-0.985915	0.305408	-3.22819	0.00124577	0.00952734	1022.67	732.123	602.548	1684.77	1699.33	936.19	1347.07	1938.57	1732.12	AIG1	no
gene12757	533.277	-0.825571	0.340975	-2.42121	0.015469	0.0623601	481.373	339.616	235.036	653.875	531.58	361.336	802.811	745.143	648.719	ADAT2	no
gene12758	1463.41	0.000819911	0.425236	0.00192813	0.998462	0.999356	1877.55	949.254	1565.13	1382.67	1067.47	625.221	2136.81	2160.91	1405.7	PEX3	no
gene12759	504.004	0.135661	0.299687	0.452675	0.650783	0.789709	591.229	295.076	722.203	480.431	472.276	503.681	520.117	517.994	433.03	FUCA2	no
gene1276	6823.44	-1.39337	0.838416	-1.66191	0.0965312	0.22702	4054.71	2265.03	3499.91	2501.5	6259.28	34606.2	2727.34	1808.77	3688.19	S100A4	no
gene12760	1215.79	-1.03811	0.501835	-2.06863	0.0385809	0.119442	593.227	640.259	909.164	1364.75	1677.77	292.354	1612.66	2021.5	1830.46	PHACTR2	no
gene12762	1345.06	-0.679114	0.216063	-3.14314	0.00167149	0.0118492	847.895	1109.78	923.052	1457.58	1522.5	1761.79	1418.5	1230.69	1833.77	LTV1	no
gene12763	298.226	-1.97166	0.446821	-4.41265	1.02e-05	0.000203745	86.8867	158.673	57.6908	538.246	371.999	162.054	347.08	437.471	523.933	ZC2HC1B	down
gene12764	1964.46	-0.145717	0.349555	-0.416864	0.676778	0.807676	1443.12	2176.88	1883.5	2134.26	2419.61	921.955	1791.74	2424.12	2484.97	PLAGL1	no
gene12766	385.265	0.384337	0.624367	0.615563	0.538183	0.708116	457.404	405.498	506.397	388.417	421.598	27.374	452.713	493.957	314.03	STX11	no
gene1277	6118.97	0.998631	0.807205	1.23715	0.216033	0.397208	13727.1	5983.18	7811.76	2311.77	2897.28	17948.6	1136.81	1541.96	1712.29	S100A3	no
gene12772	10264.8	-0.270677	0.513092	-0.527541	0.597818	0.750994	8051.5	9375.62	9642.9	11631.3	13402.7	1935.89	10910.4	16234.5	11198.5	UTRN	no
gene12777	139.987	-1.4824	0.405409	-3.65656	0.000255625	0.00273457	55.9271	73.305	61.9642	176.701	277.112	72.2673	148.892	186.286	207.425	EPM2A	down
gene12779	189.277	0.576164	0.510245	1.12919	0.258817	0.446785	94.8763	253.32	379.263	141.687	227.512	58.0328	152.916	235.561	160.32	FBXO30	no
gene1278	14296.3	-0.38003	0.44603	-0.852029	0.394198	0.58662	17879.7	7816.73	10016.8	11910.6	12982.2	27049.9	11155.9	21699.3	8155.68	S100A2	no
gene12780	958.798	0.0149425	0.366193	0.0408051	0.967451	0.984873	676.119	1086.58	1133.52	1047.18	1098.74	431.414	1023.13	1289.58	842.921	SHPRH	no
gene12781	17.7078	-4.73799	1.10439	-4.29013	1.79e-05	0.000327585	0	2.78374	0	9.77149	17.2521	61.3177	14.0844	38.459	15.7015	GRM1	down
gene12782	342.719	-0.425493	0.445249	-0.95563	0.339259	0.53311	354.538	259.815	222.216	251.616	280.347	832.169	278.67	283.635	321.467	RAB32	no
gene12783	19.6007	-2.5345	0.601207	-4.21569	2.49e-05	0.000423926	4.99349	3.71165	5.34174	30.943	15.0956	28.4689	14.0844	45.67	28.0974	ADGB	down
gene12786	1519.43	-0.737244	0.471442	-1.56381	0.117863	0.260487	855.884	1085.66	1213.64	1689.65	1569.94	516.821	1642.85	3330.31	1770.13	STXBP5	no
gene12787	15238.2	-1.51399	0.479788	-3.15554	0.00160199	0.0115115	6597.4	8145.21	5690.02	20425.7	28952.3	4529.84	16586.4	23327.8	22889.4	SASH1	no
gene1279	5165.71	1.05638	0.640639	1.64894	0.0991593	0.230964	11251.3	5084.03	7364.12	2161.94	2811.01	11743.4	2035.2	2614.01	1426.36	S100A16	no
gene12795	1192.74	-0.316922	0.532148	-0.595553	0.551474	0.718389	815.936	1134.84	1123.9	1609.85	1471.82	221.182	1845.06	1557.59	954.485	UST	no
gene12796	2444.47	0.0460638	0.317893	0.144904	0.884787	0.937916	2158.19	2462.68	2869.58	2398.09	2624.48	1214.31	2320.91	3133.2	2818.83	TAB2	no
gene12799	35.1958	-0.237764	0.536291	-0.443348	0.657514	0.794591	18.9753	38.0444	37.3922	32.5716	20.4869	17.5193	80.4823	32.4498	38.8405	ZC3H12D	no
gene128	428.565	1.41205	0.47778	2.95545	0.00312216	0.0190333	960.748	376.732	864.293	286.63	155.269	164.244	338.026	525.205	185.939	GJB5	no
gene1280	515.816	-0.355311	0.646058	-0.549967	0.582342	0.740304	746.028	257.032	301.274	299.659	692.241	1394.98	212.272	550.444	188.418	S100A1	no
gene12800	1153.67	-0.205066	0.462275	-0.443602	0.657331	0.794591	945.767	1015.14	1180.52	1363.12	1209.8	287.974	1329.97	1324.43	1726.34	PPIL4	no
gene12801	1456.72	-0.22288	0.208714	-1.06787	0.28558	0.475823	1309.29	1092.15	1530.94	1299.61	1334.88	1505.57	1717.29	1712.63	1608.16	GINM1	no
gene12802	1754.48	-0.0882447	0.164753	-0.535618	0.592222	0.746773	1722.75	1617.35	1711.49	1832.15	1877.24	1930.41	1692.14	1501.1	1905.66	KATNA1	no
gene12803	1326.47	0.178003	0.353459	0.503604	0.61454	0.762773	1096.57	1377.02	1839.69	1233.65	1311.16	601.132	1236.41	1742.67	1499.9	LATS1	no
gene12805	526.97	-0.163778	0.186228	-0.879444	0.37916	0.572253	442.423	463.956	557.677	556.975	635.093	524.485	520.117	489.15	552.857	NUP43	no
gene12806	50.508	-1.45227	0.635226	-2.28623	0.0222407	0.0808495	25.9662	25.0536	19.2303	79.8005	60.3824	6.56975	116.699	58.8903	61.9795	PCMT1	no
gene12807	544.178	0.363123	0.387858	0.936226	0.349157	0.543269	727.052	475.091	714.724	501.603	423.755	283.594	844.058	602.123	325.599	LRP11	no
gene12809	5.5789	1.82831	0.974022	1.87708	0.0605078	0.165079	0.998698	19.4862	11.7518	4.07145	2.15651	0	6.03617	2.40369	3.30557	LOC101105006	no
gene1281	2730.97	-0.0290587	0.220187	-0.131973	0.895006	0.942508	2595.62	3087.16	2400.58	2858.97	2597.52	3299.11	2912.45	2027.51	2799.82	CHTOP	no
gene12810	13.3094	-0.112233	0.78391	-0.14317	0.886156	0.939007	15.9792	9.27912	12.8202	30.1288	11.8608	0	12.0723	14.4221	13.2223	LOC101105258	no
gene12812	5.5151	-2.52636	1.30517	-1.93565	0.0529104	0.150051	0.998698	1.85582	1.06835	4.07145	29.1129	0	2.01206	7.21106	3.30557	IYD	no
gene12813	3447.77	-0.762903	0.514253	-1.48352	0.137937	0.290878	1985.41	2625.99	2450.79	4630.87	4470.45	699.679	4295.74	5784.47	4086.52	PLEKHG1	no
gene12815	511.111	-0.403725	0.27124	-1.48845	0.136633	0.289022	343.552	434.263	483.961	429.131	742.919	527.77	456.737	502.37	679.295	MTHFD1L	no
gene12816	1694.12	0.289971	0.370127	0.783437	0.433371	0.621581	1790.67	1852.11	2142.04	954.349	2240.62	1251.54	1515.08	1023.97	2476.7	AKAP12	no
gene12817	296.057	0.537819	0.225905	2.38073	0.0172783	0.0674638	333.565	431.479	355.76	219.044	268.486	218.992	280.682	239.167	317.335	ZBTB2	no
gene12818	626.071	-0.787482	0.256605	-3.06885	0.00214881	0.0143778	511.333	481.586	272.429	746.704	699.789	673.4	824.944	652.601	771.852	RMND1	no
gene12819	219.3	-0.541299	0.245221	-2.20739	0.0272867	0.0938157	211.724	154.961	137.817	263.016	208.104	270.455	269.616	257.194	200.814	ARMT1	no
gene1282	765.578	0.130749	0.28494	0.458866	0.64633	0.786739	1015.68	623.557	798.056	657.132	701.945	1096.05	734.401	676.638	586.739	SNAPIN	no
gene12820	36.1699	-0.00769661	0.492472	-0.0156285	0.987531	0.995887	47.9375	32.4769	27.777	32.5716	43.1303	12.0445	64.3859	28.8442	36.3613	LOC106991320	no
gene12821	184.213	-0.686007	0.670059	-1.0238	0.30593	0.498313	145.81	102.07	145.295	291.516	318.086	12.0445	220.32	234.359	188.418	CCDC170	no
gene12822	744.621	-0.414919	0.333197	-1.24527	0.213033	0.393657	533.305	522.414	772.415	1000.76	1172.06	456.598	767.6	747.546	728.879	ESR1	no
gene12824	3052.19	-1.18094	0.500784	-2.35818	0.0183646	0.0705288	1261.36	2109.14	1592.91	3752.25	3283.29	817.934	4576.43	4177.61	5898.8	SYNE1	no
gene12827	222.768	-1.19576	0.80911	-1.47787	0.139444	0.293116	71.9063	120.629	166.662	175.887	412.972	5.47479	349.092	478.334	223.953	MYCT1	no
gene12828	2.84988	-3.54773	1.57382	-2.25422	0.0241824	0.086041	0	0.927912	0	5.70003	4.31303	0	2.01206	3.60553	9.09033	VIP	no
gene12829	166.396	0.674272	0.253518	2.65966	0.00782196	0.0377144	219.714	225.483	219.011	131.101	160.66	189.428	120.723	116.579	114.869	FBXO5	no
gene12830	604.246	-0.479337	0.173161	-2.76815	0.00563748	0.029566	457.404	488.082	490.371	655.504	660.971	562.809	685.106	682.647	755.324	MTRF1L	no
gene12831	25.5263	-2.38543	0.625713	-3.81233	0.000137661	0.00167898	5.99219	5.56747	8.54678	33.3859	26.9564	8.75967	35.211	67.3032	38.0141	RGS17	down
gene12833	31.2572	0.570097	0.569958	1.00024	0.317192	0.510318	54.9284	21.342	43.8022	48.8574	31.2694	39.4185	18.1085	12.0184	11.5695	LOC101104501	no
gene12834	2.92644	-4.57753	1.87299	-2.44397	0.0145266	0.0593976	0	0	0	4.88574	1.07826	17.5193	0	1.20184	1.65279	OPRM1	no
gene12835	110.924	-1.53025	0.678062	-2.2568	0.0240206	0.0856371	23.9688	75.1609	48.0756	121.329	106.747	14.2345	173.037	281.231	154.536	IPCEF1	no
gene12836	1411.35	-0.0572647	0.243227	-0.235437	0.813869	0.893741	1531	1155.25	1436.93	1613.11	1761.87	1024.88	1247.48	1432.6	1499.08	CNKSR3	no
gene12842	2079.58	-0.191165	0.407085	-0.469596	0.638643	0.782562	1587.93	2334.63	1777.73	2304.44	2685.94	741.287	1891.33	2753.42	2639.5	SCAF8	no
gene12843	436.425	-0.694378	0.313364	-2.21589	0.0266993	0.0923502	262.658	383.228	280.975	543.132	640.484	681.064	367.201	403.819	365.266	TIAM2	no
gene12844	165.498	-0.352551	0.327301	-1.07714	0.281416	0.471451	124.837	186.51	107.903	238.587	209.182	113.876	175.049	141.817	191.723	TFB1M	no
gene12847	2.74587	-4.48317	1.83705	-2.44042	0.01467	0.0598238	0	0	0	0.814291	2.15651	16.4244	2.01206	0	3.30557	NOX3	no
gene1285	64.0288	1.52812	0.479205	3.18887	0.00142831	0.0105332	77.8985	143.826	118.587	26.8716	66.8519	48.1782	38.2291	12.0184	43.7989	NPR1	no
gene12850	4658.87	-0.518797	0.483209	-1.07365	0.28298	0.473224	3189.84	4565.33	3091.8	5820.55	6507.28	1282.2	4373.21	8299.93	4799.69	ARID1B	no
gene12851	613.637	-0.562945	0.235949	-2.38587	0.0170386	0.0667338	520.322	478.803	397.425	727.161	659.893	474.117	768.606	755.959	740.449	TMEM242	no
gene12853	911.72	-1.28827	0.484366	-2.65971	0.00782071	0.0377144	420.452	681.087	292.727	1574.84	1132.17	308.778	1565.38	1091.27	1138.77	ZDHHC14	no
gene12855	2524.68	0.0765969	0.208176	0.367942	0.712916	0.82989	2426.84	2564.75	2853.56	2522.67	2635.26	1871.28	2632.78	2276.29	2938.66	SNX9	no
gene12859	242.068	0.287705	0.474417	0.60644	0.544223	0.712917	151.802	359.102	315.162	377.831	205.947	73.3622	218.308	228.35	248.744	SYNJ2	no
gene1286	124.009	-0.385407	0.715457	-0.538687	0.590103	0.745481	99.8698	115.989	92.9462	32.5716	177.912	384.331	77.4642	30.0461	104.952	LOC106990802	no
gene12860	362.658	-0.622182	0.530869	-1.17201	0.241194	0.427031	214.72	308.995	276.702	484.503	407.581	65.6975	481.888	449.489	574.343	SERAC1	no
gene12861	1239.75	-0.632295	0.322961	-1.95781	0.0502529	0.144775	1209.42	727.483	784.167	1297.16	1223.82	2067.28	1002	1728.25	1118.11	GTF2H5	no
gene12863	1032.71	-0.702782	0.480268	-1.46331	0.143382	0.298883	609.206	937.191	637.803	1613.11	1444.86	269.36	1171.02	1406.16	1205.71	TULP4	no
gene12866	1259.18	0.418134	0.319922	1.30699	0.191217	0.365197	1395.18	1351.04	1792.69	1122.91	901.422	1919.46	884.299	919.41	1046.21	TMEM181	no
gene12868	718.672	0.192851	0.453641	0.425118	0.67075	0.803236	1048.63	615.206	688.016	393.302	603.824	1502.28	540.238	612.94	463.607	DYNLT1	no
gene12869	315.823	0.126318	0.203361	0.621152	0.5345	0.705384	391.49	321.985	289.522	260.573	306.225	295.639	331.99	342.525	302.46	SYTL3	no
gene1287	1308.27	1.0203	0.420762	2.42489	0.0153132	0.0619411	1966.44	1886.45	2075.8	1113.14	676.067	1957.79	830.98	510.783	756.976	INTS3	no
gene12870	2770.05	0.13626	0.311294	0.437722	0.661588	0.796813	3171.87	2423.71	3246.71	4305.15	2357.07	1907.42	2598.57	2091.21	2828.74	EZR	no
gene12872	173.473	-0.309777	0.486517	-0.636724	0.524304	0.697946	172.775	139.187	136.748	153.087	102.434	432.509	143.862	102.157	178.501	RSPH3	no
gene12873	55.4727	0.386473	0.451665	0.855664	0.392184	0.584556	57.9245	59.3864	80.1261	33.3859	49.5998	17.5193	71.4281	61.294	68.5907	TAGAP	no
gene12874	2.06364	-1.29057	1.49086	-0.865654	0.38668	0.579465	0	0	3.20504	2.44287	0	5.47479	3.01809	3.60553	0.826394	LOC105608996	no
gene12875	707.913	-0.501019	0.409955	-1.22213	0.221658	0.404562	370.517	476.947	816.217	510.56	843.197	930.715	604.623	501.169	1317.27	FNDC1	no
gene12877	2.22498	0.511734	1.46291	0.349806	0.726484	0.839185	0	0.927912	7.47843	1.62858	4.31303	0	4.02412	0	1.65279	LOC101111200	no
gene1288	773.991	0.747771	0.440782	1.69646	0.0897983	0.216604	1277.33	988.226	913.437	692.961	394.642	1135.47	759.552	545.637	258.661	SLC27A3	no
gene12880	1609.32	-0.600431	0.354428	-1.69408	0.0902494	0.217308	1055.62	1136.69	1399.54	1678.25	1228.13	1097.15	2337.01	2877.21	1674.27	SOD2	no
gene12881	1567.78	-0.0924908	0.159685	-0.579209	0.562448	0.726185	1490.06	1480.95	1534.15	1537.38	1504.17	1580.03	1693.15	1450.62	1839.55	WTAP	no
gene12882	1384.68	1.0008	0.430043	2.32721	0.0199542	0.0747253	2523.71	1506.93	2201.86	921.777	605.98	1944.65	1302.81	883.355	571.038	ACAT2	no
gene12883	5544.68	0.264755	0.34869	0.759286	0.447681	0.635537	6137	5430.14	7160.06	5545.32	4447.81	9308.24	4288.7	3873.54	3711.33	TCP1	no
gene12885	47.6531	-0.0402309	0.442356	-0.0909468	0.927535	0.961988	38.9492	71.4492	29.9137	55.3718	20.4869	55.8429	59.3557	39.6608	57.8475	PNLDC1	no
gene12886	8.55334	1.21681	0.607515	2.00293	0.0451844	0.13403	7.98959	10.207	23.5036	8.14291	5.39128	3.28488	7.0422	4.80737	6.61115	MAS1	no
gene12887	565.661	0.758199	0.408886	1.85431	0.0636955	0.170939	471.386	841.616	1020.27	621.304	337.494	215.707	607.641	408.627	566.906	IGF2R	no
gene12888	23.8206	2.18106	0.629984	3.46208	0.000536018	0.00496536	40.9466	47.3235	60.8958	17.1001	11.8608	0	17.1025	8.4129	10.7431	LOC106991323	up
gene12889	465.259	1.72767	0.459259	3.76186	0.000168651	0.00195603	1063.61	681.087	866.43	293.959	392.485	79.932	362.17	179.075	268.578	LOC106991303	up
gene1289	781.634	0.416658	0.453152	0.919467	0.357851	0.551865	735.042	1054.11	1026.68	723.09	802.223	183.953	674.039	968.685	866.887	GATAD2B	no
gene12890	2.86334	-1.98465	1.28472	-1.54481	0.122393	0.26737	0	2.78374	0	1.62858	8.62605	4.37984	3.01809	1.20184	4.13197	SLC22A1	no
gene12891	2.10154	-4.1297	1.65187	-2.50002	0.0124188	0.0529489	0	0	0	2.44287	2.15651	2.18992	1.00603	1.20184	9.91672	SLC22A2	no
gene12892	421.926	-1.59386	0.46863	-3.4011	0.000671141	0.00587679	125.836	266.311	147.432	454.374	441.007	224.467	685.106	447.086	1005.72	SLC22A3	down
gene12893	13.601	-1.25428	0.761312	-1.64752	0.0994516	0.231342	1.9974	15.7745	3.20504	5.70003	17.2521	35.0387	16.0965	10.8166	16.5279	PLG	no
gene12895	1850.72	0.0751415	0.186061	0.403855	0.686319	0.813652	1731.74	2029.34	1986.06	2038.98	1477.21	1772.74	1996.97	1721.04	1902.36	MAP3K4	no
gene12896	91.0405	-1.28871	0.499981	-2.57752	0.00995133	0.0450116	40.9466	78.8725	19.2303	136.801	119.686	48.1782	111.669	93.7438	170.237	AGPAT4	no
gene12898	3018.51	-1.98501	0.561689	-3.53399	0.000409331	0.00401375	1150.5	1202.57	693.357	4544.56	4934.1	539.815	4045.24	5063.36	4993.07	PARK2	down
gene129	295.53	2.05855	0.417853	4.92649	8.37e-07	2.51e-05	778.985	341.472	676.264	149.829	65.7736	206.947	158.953	179.075	102.473	GJB4	up
gene1290	503.317	0.385063	0.425016	0.905995	0.364939	0.558045	487.365	779.446	522.422	350.959	366.607	911.006	426.556	236.763	448.732	DENND4B	no
gene12900	357.258	-0.935259	0.370571	-2.52383	0.0116084	0.0503869	320.582	166.096	179.482	274.416	565.006	440.173	306.839	605.729	357.002	PACRG	no
gene12903	4578.81	0.15681	0.281444	0.557162	0.577417	0.736568	3967.83	4851.12	5930.4	4488.37	5007.42	2657.46	4115.66	5224.41	4966.62	QKI	no
gene12908	7.18017	-2.62642	0.988149	-2.65793	0.00786234	0.0378423	0.998698	3.71165	0	6.51432	7.5478	14.2345	20.1206	2.40369	9.09033	C8H6orf118	no
gene12909	353.924	-1.75556	0.466129	-3.76626	0.00016571	0.00192962	155.797	179.087	75.8527	367.245	547.754	246.366	303.821	408.627	900.769	PDE10A	down
gene1291	769.781	-0.0544273	0.358885	-0.151657	0.879458	0.934615	781.981	815.635	653.829	627.818	534.815	1426.73	768.606	562.463	756.15	CRTC2	no
gene12912	0.9416	-2.93431	2.64284	-1.11029	0.266876	0.455603	0	0	0	0	1.07826	6.56975	0	0	0.826394	T	no
gene12915	1523.42	-0.205194	0.222776	-0.921078	0.35701	0.551132	1502.04	1248.04	1397.4	1162.81	1389.87	1793.54	1722.32	1698.2	1796.58	SFT2D1	no
gene12916	3049.36	0.234505	0.294782	0.795522	0.42631	0.614881	4522.11	2515.57	3127.05	3007.17	2656.82	1909.61	3047.26	3789.41	2869.24	MPC1	no
gene12917	344.28	0.527527	0.190162	2.77409	0.00553562	0.0291886	448.415	475.091	373.922	282.559	291.129	310.968	350.098	281.231	285.106	RPS6KA2	no
gene12918	649.672	1.07315	0.245973	4.36289	1.28e-05	0.000249376	845.897	1129.27	1022.41	539.06	416.207	629.601	472.834	405.021	386.752	RNASET2	up
gene12919	882.171	-0.769853	0.22131	-3.47862	0.000503997	0.00472793	640.166	650.466	509.602	1182.35	830.258	878.157	1219.31	1038.39	990.846	FGFR1OP	no
gene1292	1454.8	1.19088	0.322477	3.6929	0.000221713	0.0024592	2185.15	2188.94	2604.63	716.576	1133.25	1644.63	996.975	695.867	927.214	SLC39A1	up
gene12920	63.9745	0.307063	0.577974	0.531275	0.595228	0.748853	23.9688	89.0795	106.835	55.3718	44.2085	128.11	55.3316	48.0737	24.7918	CCR6	no
gene12922	4.97221	-1.43262	0.915874	-1.56422	0.117767	0.260339	2.99609	1.85582	2.13669	1.62858	7.5478	12.0445	3.01809	3.60553	9.91672	LOC105612542	no
gene12923	3.54652	0.636879	1.25037	0.509354	0.610504	0.760208	3.99479	5.56747	4.27339	0.814291	0	14.2345	1.00603	1.20184	0.826394	TTLL2	no
gene12924	903.861	0.348423	0.332675	1.04734	0.294944	0.486315	1082.59	916.777	1164.5	656.318	746.154	1483.67	682.088	728.317	674.337	UNC93A	no
gene12928	3872.47	0.480571	0.391044	1.22894	0.219093	0.401512	4356.32	5237.14	4729.57	4665.88	3068.72	1265.77	4306.81	3085.13	4136.93	MLLT4	no
gene1293	26.6464	0.873576	0.536264	1.629	0.103312	0.23786	65.9141	24.1257	24.572	29.3145	26.9564	8.75967	18.1085	28.8442	13.2223	CREB3L4	no
gene12930	42.263	-1.95243	0.69259	-2.81903	0.00481697	0.0263144	5.99219	20.4141	17.0936	40.7145	14.0173	133.585	47.2834	25.2387	76.0282	KIF25	no
gene12931	7.2239	-5.87971	1.66065	-3.54061	0.000399208	0.0039406	0	0	0	0.814291	4.31303	43.7984	3.01809	4.80737	8.26394	FRMD1	down
gene12934	1297.82	0.847129	0.633595	1.33702	0.181216	0.351928	1726.75	2106.36	1697.6	653.875	1640.03	2621.33	432.592	453.095	348.738	SMOC2	no
gene12935	1357.98	0.324596	0.376458	0.862235	0.388558	0.581152	1169.48	1528.27	2008.49	1315.08	1615.23	1697.19	1290.74	555.251	1042.08	THBS2	no
gene12937	231.907	-1.70577	0.424826	-4.01521	5.94e-05	0.000863782	104.863	102.998	69.4426	300.473	140.173	280.309	570.418	265.607	252.876	WDR27	down
gene12938	446.321	1.06152	0.520481	2.03951	0.0413996	0.125886	462.397	656.962	931.599	231.259	281.425	824.504	240.441	200.708	187.591	C8H6orf120	no
gene12939	1715.29	0.215742	0.214344	1.00652	0.314165	0.507038	1729.75	2157.4	1784.14	1687.21	1316.55	1908.51	1699.18	1350.87	1804.02	PHF10	no
gene1294	992.375	-0.170634	0.395139	-0.431833	0.665863	0.79981	1178.46	740.474	827.969	816.733	951.022	2041	757.54	891.768	726.4	JTB	no
gene12940	138.024	-1.20675	0.393805	-3.06432	0.00218163	0.0145699	91.8802	91.8633	37.3922	204.387	128.313	154.389	211.266	104.56	218.168	TCTE3	no
gene12941	1193.04	-0.707642	0.323775	-2.1856	0.0288451	0.0975109	777.986	1154.32	584.386	1728.74	962.883	1707.04	1449.69	993.924	1378.42	ERMARD	no
gene12943	278.355	1.04381	0.320368	3.25816	0.00112137	0.00880727	494.356	388.795	388.878	249.173	157.425	143.44	319.917	183.882	179.327	DLL1	up
gene12944	1176.24	0.151826	0.449505	0.337762	0.735543	0.845593	976.727	1548.69	1255.31	1473.05	1174.22	306.588	1403.41	1067.24	1380.9	FAM120B	no
gene12946	574.949	-0.0291546	0.195346	-0.149246	0.88136	0.93574	562.267	603.143	536.31	516.26	502.468	664.64	579.473	534.82	675.163	TBP	no
gene12947	599.37	0.191262	0.338365	0.565252	0.571903	0.732322	653.149	674.592	632.462	504.86	507.859	1034.74	474.846	397.81	514.017	PDCD2	no
gene1295	911.461	-0.365822	0.445129	-0.821833	0.411172	0.602367	997.699	568.81	726.476	769.505	997.387	2111.08	593.557	753.556	685.08	RAB13	no
gene12950	3.25702	2.13387	1.00314	2.12719	0.033404	0.107985	5.99219	6.49538	7.47843	1.62858	0	1.09496	3.01809	3.60553	0	LOC101121783	no
gene12955	0.799423	-2.69509	2.19383	-1.22849	0.219264	0.401702	0	0	0	1.62858	2.15651	0	1.00603	2.40369	0	DDX43	no
gene12956	0.356116	2.539	3.42817	0.740627	0.45892	0.645646	0	0	3.20504	0	0	0	0	0	0	OOEP	no
gene12959	827.88	-2.37312	0.617767	-3.84145	0.000122311	0.00152635	264.655	260.743	130.338	1317.52	1486.92	118.256	1752.5	1082.86	1037.12	KCNQ5	down
gene12962	86.6502	-4.45269	0.644614	-6.90753	4.93e-12	8.03e-10	3.99479	12.0629	1.06835	181.587	225.356	122.635	73.4401	72.1106	87.5977	RIMS1	down
gene12963	1.56545	-3.68673	2.001	-1.84244	0.0654101	0.174172	0	0	0	4.07145	1.07826	0	0	4.80737	4.13197	RRAGC	no
gene12966	267.057	-0.449211	0.490857	-0.915156	0.36011	0.553978	155.797	174.447	314.094	283.373	188.695	98.5463	357.14	524.004	307.418	OGFRL1	no
gene12967	133.205	-2.10876	0.433874	-4.8603	1.17e-06	3.31e-05	44.9414	54.7468	24.572	129.472	160.66	84.3118	244.465	252.387	203.293	B3GAT2	down
gene12968	2822.83	0.203874	0.236231	0.863029	0.388122	0.580646	3756.1	2721.57	2806.55	2959.95	3108.61	1972.02	2451.69	3011.82	2617.19	SMAP1	no
gene12969	748.941	-1.12646	0.402008	-2.80207	0.00507751	0.0273066	495.354	424.984	335.461	663.647	1043.75	388.71	1020.11	1473.46	894.984	SDHAF4	no
gene1297	2588.41	-1.67505	0.463075	-3.61724	0.00029776	0.00311586	1548.98	712.636	892.07	3973.74	3154.98	4323.99	1561.36	5437.14	1690.8	RPS27	down
gene12970	4078.35	-1.09687	0.43754	-2.5069	0.0121796	0.0522556	2141.21	2381.95	2431.56	6517.58	4530.83	1380.74	5171.99	6747.15	5402.13	FAM135A	no
gene12972	0.913477	1.74079	1.77504	0.980708	0.326737	0.520672	0.998698	1.85582	2.13669	0	0	0	0	2.40369	0.826394	LOC106991332	no
gene12973	20.6538	0.31502	0.719426	0.437876	0.661476	0.796804	16.9779	31.549	22.4353	5.70003	31.2694	8.75967	36.217	28.8442	4.13197	LOC101102992	no
gene12974	80.9613	-2.35532	0.390237	-6.03561	1.58e-09	1.24e-07	22.9701	28.7653	12.8202	131.101	138.017	64.6026	107.645	131.001	91.7297	COL19A1	down
gene12975	2478.74	-0.701338	0.229313	-3.05842	0.00222504	0.0147986	1728.75	1623.85	1894.18	2586.19	3101.07	2189.92	2404.41	3311.08	3469.2	LMBRD1	no
gene12978	52.5366	-2.88305	0.503877	-5.72173	1.05e-08	6.28e-07	13.9818	7.4233	8.54678	53.7432	58.2259	106.211	49.2954	124.992	50.41	ADGRB3	down
gene12988	1.11871	-3.1814	3.03614	-1.04784	0.294711	0.486112	0	0	0	0	0	7.66471	0	2.40369	0	EYS	no
gene1299	116.817	-1.24859	0.461874	-2.70331	0.00686521	0.0343125	60.9206	92.7912	28.8454	106.672	177.912	70.0774	182.091	123.79	208.251	NUP210L	no
gene12991	3543.32	-0.01592	0.43123	-0.0369177	0.970551	0.986267	3211.81	3498.23	3841.78	3275.08	4270.97	1044.59	3756.51	5271.28	3719.6	PHF3	no
gene12992	502.979	0.841738	0.519971	1.61882	0.105487	0.241458	404.473	783.158	951.898	407.96	447.476	79.932	427.562	511.985	512.364	PTP4A1	no
gene12994	57.3142	-0.73549	0.298578	-2.46331	0.0137662	0.057269	32.957	43.6119	42.7339	66.7718	70.0867	72.2673	50.3014	55.2848	81.813	LOC101105008	no
gene12999	622.06	0.24313	0.250568	0.970314	0.33189	0.525978	689.102	772.951	619.642	522.775	630.78	502.586	721.323	427.856	711.525	LOC101105510	no
gene13	4408.69	1.12275	0.432631	2.59516	0.00945475	0.0433172	6056.11	6695.81	7930.34	2147.28	3049.31	6861.01	2494.95	1859.25	2584.13	2021-09-02	no
gene130	617.824	2.34722	0.333019	7.04833	1.81e-12	3.46e-10	1689.8	906.57	1394.19	231.259	213.495	247.461	226.357	431.462	219.821	GJB3	up
gene13001	489.084	0.818735	0.433419	1.88901	0.0588902	0.161734	976.727	527.982	557.677	355.845	333.181	781.801	292.754	361.755	214.036	C9H8orf33	no
gene13002	869.851	-0.413637	0.291342	-1.41977	0.155676	0.316159	831.916	875.949	428.407	883.505	900.344	770.851	1194.16	938.639	1004.89	ZNF34	no
gene13004	35491.2	0.21134	0.686271	0.307954	0.758117	0.860618	52985.9	28498	35628.3	20331.2	25790.8	110828	13890.2	21630.8	9837.39	RPL8	no
gene13005	557.919	0.564055	0.403967	1.39629	0.162627	0.326195	675.12	714.492	744.638	517.074	323.477	939.475	405.43	264.405	437.162	ZNF7	no
gene13007	1108.01	0.032721	0.282299	0.115909	0.907725	0.950099	1103.56	1462.39	808.739	1257.26	884.17	889.107	1234.4	961.474	1370.99	ARHGAP39	no
gene13008	149.632	1.12744	0.321316	3.50882	0.000450095	0.0043251	291.62	208.78	201.918	80.6148	92.7301	169.719	97.5848	117.781	85.9449	C9H8orf82	up
gene13009	268.639	0.462983	0.501455	0.923279	0.355862	0.550134	450.413	279.301	256.403	151.458	138.017	577.043	207.242	195.9	161.973	LRRC24	no
gene13010	652.889	-0.292558	0.426119	-0.686564	0.492357	0.673752	755.016	497.361	450.843	670.975	456.103	1444.25	588.527	520.398	492.531	LRRC14	no
gene13013	9.20727	0.211729	0.83243	0.25435	0.799225	0.883681	8.98828	7.4233	13.8885	5.70003	6.46954	26.279	10.0603	2.40369	1.65279	GPT	no
gene13014	3.52504	-1.8389	1.10377	-1.66602	0.0957089	0.225638	0.998698	2.78374	0	2.44287	2.15651	8.75967	8.04823	2.40369	4.13197	FOXH1	no
gene13015	367.669	-0.587135	0.513931	-1.14244	0.253271	0.441108	285.628	388.795	151.705	419.36	260.938	944.949	286.718	213.928	357.002	KIFC2	no
gene13016	2368.6	0.116645	0.492268	0.236955	0.812692	0.893056	3034.05	2320.71	2138.83	1788.18	1447.02	5763.86	1717.29	1585.23	1522.22	CYHR1	no
gene13017	356.769	0.858501	0.518331	1.65628	0.0976656	0.228715	579.245	426.839	520.285	179.144	251.234	695.299	240.441	201.91	116.521	TONSL	no
gene13019	3.19865	0.552003	1.0474	0.527024	0.598177	0.751233	6.99089	1.85582	3.20504	2.44287	6.46954	2.18992	0	4.80737	0.826394	SLC39A4	no
gene13020	519.738	0.929372	0.518341	1.79297	0.0729771	0.188143	751.021	894.507	635.667	252.43	285.738	1043.5	323.941	237.965	252.876	CPSF1	no
gene13021	1646.07	-0.180608	0.503405	-0.358774	0.719764	0.834524	1549.98	1949.54	1035.23	1556.11	1114.92	4112.67	1527.15	943.447	1025.55	ADCK5	no
gene13023	804.926	0.594775	0.513038	1.15932	0.246326	0.432924	1359.23	975.235	782.03	525.217	546.676	1733.32	535.207	385.792	401.627	LOC101108580	no
gene13024	0.823704	-2.77631	3.14619	-0.882438	0.37754	0.570729	0	0	0	1.62858	0	0	0	0	5.78475	SCRT1	no
gene13025	278.964	-0.185315	0.54308	-0.341229	0.732931	0.843566	318.585	251.464	196.576	159.601	196.243	773.041	210.26	158.643	246.265	DGAT1	no
gene13026	702.614	0.920721	0.239549	3.84356	0.00012126	0.00151682	1009.68	1087.51	977.538	481.246	504.624	762.091	538.225	425.452	537.156	HSF1	no
gene13029	1897.99	0.472047	0.444612	1.06171	0.288369	0.479212	2753.41	2263.18	1978.58	1392.44	1065.32	3679.06	1712.26	1020.36	1217.28	MROH1	no
gene13031	35.8139	-0.130303	0.420217	-0.310084	0.756497	0.859383	21.9714	41.756	37.3922	35.0145	23.7216	56.9379	25.1507	32.4498	47.9308	LOC101110150	no
gene13032	429.274	0.427045	0.485353	0.879866	0.378932	0.572112	543.292	494.577	514.943	304.545	279.268	951.519	284.706	271.617	218.994	HGH1	no
gene13034	109.444	0.245453	0.574987	0.426884	0.669464	0.802344	138.819	168.88	58.7591	108.301	47.4433	232.131	111.669	39.6608	79.3338	LOC105612922	no
gene13035	1751.82	0.713897	0.373924	1.9092	0.0562361	0.156762	3048.03	1736.12	2319.38	1043.92	1467.51	2563.3	1314.88	1361.69	911.512	MAF1	no
gene13036	1484.95	0.0188884	0.605582	0.0311904	0.975118	0.988251	2000.39	1392.8	1100.4	951.091	883.092	4491.52	875.245	832.877	837.137	SHARPIN	no
gene13037	3135.96	0.35307	0.529536	0.666753	0.50493	0.683218	5215.2	2688.16	3096.07	1943.71	2214.74	7208.11	1740.43	2693.33	1423.88	LOC101113599	no
gene13038	1972.73	0.834745	0.481236	1.73459	0.0828139	0.20502	3801.05	2154.61	2413.4	1077.31	1208.73	3720.67	1286.71	1115.31	976.797	GPAA1	no
gene1304	3372.5	0.103385	0.383045	0.269902	0.787236	0.875759	4182.55	3051.9	3371.7	2224.64	3170.07	6467.92	2523.12	2652.47	2708.09	TPM3	no
gene13040	352.901	0.857232	0.453881	1.88867	0.0589362	0.161778	625.185	527.054	356.828	217.416	173.599	602.227	260.562	248.782	164.452	OPLAH	no
gene13041	7.59558	0.463437	0.814776	0.568791	0.569498	0.730349	12.9831	7.4233	7.47843	8.9572	7.5478	0	13.0784	8.4129	2.47918	SMPD5	no
gene13042	1.6876	-0.473825	1.33655	-0.354513	0.722955	0.836857	0	1.85582	2.13669	0.814291	4.31303	0	2.01206	2.40369	1.65279	SPATC1	no
gene13043	572.441	0.725443	0.491386	1.47632	0.139858	0.293883	1083.59	601.287	646.35	267.902	493.842	1085.1	360.158	311.277	302.46	GRINA	no
gene13044	752.802	0.408635	0.502561	0.813105	0.416158	0.606575	1216.41	867.598	618.573	550.46	498.155	1663.24	527.159	427.856	405.759	PARP10	no
gene13045	34.5443	-0.63269	0.596498	-1.06067	0.288838	0.479722	30.9596	36.1886	8.54678	29.3145	28.0347	63.5076	59.3557	12.0184	42.9725	LOC105615982	no
gene13046	7313.68	1.74685	0.295457	5.91236	3.37e-09	2.37e-07	13401.5	13271	14573.3	4235.13	4002.49	3479.78	6073.4	2481.81	4304.68	LOC101111462	up
gene13047	2088.77	2.2779	0.375935	6.05928	1.37e-09	1.13e-07	4046.73	3945.48	5318.23	1128.61	522.954	628.506	1563.37	877.345	767.72	EPPK1	up
gene13048	54.3549	1.98229	0.600995	3.29835	0.000972542	0.0079009	108.858	131.763	84.3994	35.8288	24.7999	2.18992	49.2954	26.4405	25.6182	LOC105616111	up
gene13049	356.202	0.920806	0.315888	2.91498	0.00355714	0.0209464	587.235	594.792	377.127	285.816	229.669	225.562	429.574	209.121	266.925	LOC101111719	no
gene1305	223.444	-0.515415	0.276824	-1.86189	0.0626192	0.168944	225.706	167.952	127.133	205.201	253.39	331.773	231.387	227.148	241.307	C1H1orf189	no
gene13050	1973.89	0.872641	0.519003	1.68138	0.0926892	0.220788	3439.52	2331.84	2718.94	904.677	1411.44	3990.03	1052.31	1004.74	911.512	PUF60	no
[truncated: 15,760 more rows]
