# Supplementary material for: Transcriptome Analysis Reveals Candidate Genes Regulating the Skin and Hair Diversity of Xinji Fine-Wool Sheep and Tan Sheep
Source: MDPI journal article supplement (doi:10.3390/agriculture12010015), 2021-12-23
Supplement: s1 [file s1 › Supplementary Table S11.xls]

## Sheet: Sheet1
Table S11 | 1327 overlapped candidate genes regulating breed and time-space specificity.
name	X1	X2	X3	S1	S2	S3	S4	C1	C2	C3	C4	C5	C6
LARP1	21.2006	37.7544	52.8865	19.2378	12.8731	15.3011	11.13	16.0883	15.4878	3.69355	16.3268	11.599	19.9836
MRPL22	60.2941	83.4998	1.33562	159.371	166.205	187.987	165.753	171.58	174.576	69.2026	187.354	180.905	192.535
SGCD	2.6797	3.2783	1.12465	9.2912	14.4495	13.5126	12.465	13.9419	11.5359	0.641586	16.077	15.5164	14.5494
LOC105611754	1.22053	1.36139	49.649	2.80534	5.66212	5.08101	4.15287	3.45967	4.52621	1.28887	8.31949	5.85363	6.9502
CYFIP2	34.1763	39.0286	34.6255	28.8348	23.9324	25.0667	17.8392	30.8522	21.9408	9.62438	24.2483	18.0739	28.343
EBF1	44.407	112.346	0.145634	183.317	269.59	291.503	159.466	409.443	494.896	39.6145	507.865	388.195	605.419
LOC106990422	0.509505	0.674863	47.6533	5.46726	3.31335	3.84861	2.22557	1.60365	2.3386	0.62742	3.2147	1.67887	4.22103
FAM172A	63.4859	56.5738	6.13667	106.607	124.924	187.135	206.434	223.136	152.281	173.558	139.8	189.051	137.547
MCTP1	9.47994	15.1049	7.85131	28.9798	29.0557	32.7181	30.789	31.7222	46.7764	3.87452	73.6554	43.7481	62.2845
SPATA9	8.59149	22.2672	0.163906	37.3994	40.0481	50.3937	39.4409	30.5878	34.9824	8.96268	40.6008	35.8157	43.6172
LOC105607634	0.131069	0.0868036	0.0574477	0.938083	0.51183	0.343203	0.438934	0.762048	1.04664	0.178563	0.344573	0.901983	0.803584
NDST4	0.0229694	0.121696	5.10783	0.217336	0.499736	0.497751	0.642127	0.899677	0.291314	0.332838	0.553	0.784894	0.364488
ANK2	4.93424	11.5246	0.93667	16.1087	29.9768	19.8831	13.3921	19.7427	29.2627	4.71164	21.2945	18.3099	33.9058
COL25A1	1.69836	1.22283	18.2773	5.55313	3.41082	6.7851	4.84681	5.21304	6.554	2.71828	3.3116	8.50686	4.15876
RPL34	31.9717	49.0891	17223.6	115.118	75.7112	126.69	80.8291	134.014	114.567	77.5782	160.989	106.465	141.19
GSTCD	9880.11	18076.2	0.650821	2556.14	1918.1	2206.78	1439.34	2093.41	2104.51	1267.79	1727.96	1569.3	1709.67
ARHGEF38	0.410871	1.19728	25.7155	1.77437	3.22422	1.88461	2.02205	2.01165	3.85998	0.437626	3.22909	2.652	2.48941
BDH2	29.2035	36.5399	2.61182	90.9067	70.3525	90.219	59.7651	92.7037	89.854	34.8422	70.3007	77.6211	101.969
SLC9B1	5.25873	6.22443	2.78897	16.3417	17.1442	20.5286	12.0881	31.5905	24.9647	0.914589	37.6507	32.9234	51.9734
BANK1	1.54122	3.29027	0.618492	5.67483	6.17023	6.03137	6.58961	7.5681	6.23455	1.96719	9.092	9.06154	8.71025
UNC5C	0.890252	1.60967	0.925013	3.92894	8.04081	4.9761	3.28379	5.22357	11.032	0.997576	2.81554	5.05006	5.99324
GRID2	0.795877	0.843341	3.1266	4.27983	2.74752	1.72468	2.26584	3.90813	5.1855	1.08543	4.55515	6.8657	9.9819
CCSER1	5.70094	8.10786	12.5135	22.104	31.587	35.6026	30.3158	30.3262	35.0204	2.74685	35.4473	39.2656	46.4063
SNCA	12.6554	18.9067	2.43068	25.4914	46.6287	32.6862	33.5537	36.3846	38.3637	15.0906	41.2926	26.3997	65.5961
KCNIP4	4.36541	7.49152	56.8494	19.7367	23.5531	76.1801	20.7944	18.7992	14.0322	2.67567	46.8226	13.3837	38.2216
ANKRD35	55.0238	58.6755	0.797966	35.8087	19.5183	27.9304	23.6819	36.4161	18.1747	10.8227	41.9901	14.4796	20.1113
KLB	0.685961	0.824067	0.785928	1.7881	1.70867	2.0396	1.85355	1.21063	2.00074	1.4818	2.70171	1.7035	3.12976
CORIN	0.634038	1.11238	0	2.40457	3.0034	2.21764	1.39934	2.27376	1.84967	1.29361	2.78885	5.07597	3.07292
PPAT	0.0765018	0.168884	0.173883	0.556816	0.540582	0.607864	0.467834	0.436985	0.467159	0.227395	1.22788	0.726158	1.06682
EPHA5	0.254921	0.399046	4.80492	1.09639	1.25404	1.54426	1.23499	1.02118	0.587835	0.30137	1.69306	1.60031	2.03931
SLC4A4	2.44368	6.10926	2.05658	10.7975	11.4231	12.464	7.95589	14.7632	19.7869	3.13551	14.6903	10.5946	37.5418
ART3	1.1512	1.90602	0.912095	5.44632	4.49548	4.54387	2.33468	7.24674	6.31523	2.35252	3.89112	3.98063	10.1422
C6H4orf22	2.8263	3.16995	2.9037	11.3473	11.3928	21.5845	14.2372	15.4559	27.3657	1.2703	9.1584	13.4678	8.12148
LOC105609538	4.37604	6.15114	0.275464	16.5104	15.1954	21.2399	11.9371	15.3039	13.3402	3.25186	21.427	14.7501	20.8709
STK32B	0.238635	0.364711	114.431	1.14902	1.78183	1.37237	1.41122	1.16837	0.724301	0.477429	1.24963	1.93407	1.19164
MSX1	107.947	111.845	0.215287	67.1452	49.5226	59.7889	48.4551	20.3409	27.6715	31.6905	15.9777	16.5829	25.6123
CLNK	0.15986	0.260605	6.34205	1.32464	0.809478	1.02594	0.816453	1.08372	0.502533	0.237585	1.75591	1.36566	1.04662
C1QTNF7	6.97735	12.9214	5.84145	38.1353	47.2314	40.5651	30.0685	56.7581	59.7912	5.46095	102.764	50.1548	48.0904
LDB2	8.62724	19.8917	498.345	45.1623	46.5154	43.8534	25.7744	101.837	134.139	6.70492	104.541	54.875	142.761
LOC101108390	286.463	475.512	25.4275	312.705	203.391	129.385	235.277	120.351	159.325	31.5296	188.779	96.586	135.245
BLOC1S4	15.6337	24.7728	21.4964	11.4487	10.9152	8.52159	10.4738	9.39185	8.78532	2.28073	11.3068	8.05705	10.3771
MFSD10	15.4103	25.2763	50.3846	13.9997	10.0543	7.42554	5.29247	7.1835	7.41655	2.13836	12.762	4.90578	11.525
FGFR3	46.7905	68.7446	11.3014	45.6128	26.8623	30.072	24.1608	25.947	16.9145	17.5781	25.0809	15.0511	19.8063
LOC106990166	8.50043	12.8789	23.0948	4.64568	2.2296	2.2945	2.03241	1.64284	1.84935	1.10819	1.98091	0.976729	1.41988
CTBP1	20.6557	27.8648	10.3674	18.2558	12.9989	11.6038	12.0672	13.1708	13.5144	6.67281	19.0066	9.63422	15.7428
TMEM175	13.4204	32.4578	44.3869	16.1356	8.07445	9.18129	4.72174	8.91423	5.68005	3.91423	13.0048	4.76072	13.3473
GAK	45.9851	64.3524	1.34094	35.9927	19.5939	21.4423	14.8961	26.8933	19.9508	16.9824	30.1609	13.3283	29.5081
ARL14EPL	1.12591	4.33194	1.37452	16.4679	15.912	14.6393	5.38649	22.969	16.773	4.38257	36.4987	7.32838	20.4962
ANKRD31	1.99221	2.99263	5.08123	7.70011	6.63421	9.18016	7.45517	4.92371	7.15297	0.86216	15.183	11.9329	14.2485
PDE8B	4.68404	13.5297	0.120966	31.5254	17.2052	30.971	20.2138	35.7816	30.1804	3.52267	39.8235	26.1745	38.6093
ANKDD1A	0	0.320314	20.9531	3.02746	1.07926	5.34531	1.09859	1.95363	0.749727	0.143764	1.84704	0.895228	1.32567
MTFMT	22.7237	35.3687	17.7669	70.984	46.8594	85.4562	60.83	65.6935	52.581	36.0061	65.7706	55.4552	83.993
RASL12	23.996	37.6055	0.434142	11.6551	14.0757	11.8673	7.16074	18.6989	15.267	4.80215	16.0159	8.76128	18.919
SLC24A1	0.611013	1.04843	32.6549	2.6077	1.46415	2.48265	1.75909	3.17854	2.72009	0.706868	3.33176	3.5886	3.48569
MAP2K5	38.5048	61.801	11.6762	109.592	103.114	137.965	84.1903	143.59	119.556	31.5491	151.84	133.683	138.037
SENP8	11.811	11.416	19.7639	29.5652	31.2972	30.5233	28.201	29.9393	24.1787	21.3193	29.4161	33.2922	28.7234
KHNYN	18.8031	20.5268	6.08377	10.4298	8.6796	7.55014	7.38667	8.31863	8.71119	4.86761	11.1006	7.34918	8.88215
NYNRIN	3.03942	7.21662	63.4129	3.15055	2.43575	2.31445	1.11802	1.93502	2.08189	0.503467	2.92172	1.12543	2.37557
LOC101122398	48.0975	47.0128	50.7708	33.6694	28.8981	17.9584	21.2073	45.7931	23.0185	10.3957	37.5631	21.7396	32.1746
DCAF11	38.509	47.2906	16.4295	28.1487	21.5441	18.8358	18.1187	29.1568	22.2493	15.6163	33.0659	22.2058	28.5302
THTPA	9.83085	16.6218	68.1538	7.8478	6.46992	5.15411	6.41163	5.54523	5.29883	2.18824	6.31857	2.77364	5.48975
SF3B4	58.451	67.2623	149.949	38.0042	38.7229	30.2182	23.4846	33.8049	33.5152	29.1007	41.7402	22.7222	35.0358
LRP10	131.822	124.792	130.321	61.1323	58.0182	38.9647	40.4832	59.1645	50.8313	37.582	69.1818	37.5191	49.5353
MMP14	89.2171	104.073	1.6214	44.5995	33.983	23.0272	17.844	30.2829	38.1074	7.98992	39.1681	13.9265	34.4973
SALL2	1.49337	1.99337	10.1632	0.775186	0.942884	0.464101	0.49556	0.552625	0.538348	0.283885	0.538201	0.18131	0.133601
ZNF219	11.4456	13.5255	0.0511779	8.70327	6.67068	6.40873	5.29505	8.30284	5.61684	4.04205	7.33145	3.80074	6.75222
LOC105615652	0.0467715	0.178109	108.091	0.391488	0.156552	0.671475	0.326883	0.393588	0.626145	0.0955792	0.514487	0.55772	0.404831
NDRG2	87.7005	98.5853	7.32427	43.6453	38.3094	33.8938	36.7748	47.1416	34.7805	20.793	64.239	22.6443	32.8191
MEIS2	9.39834	15.6058	2.65714	36.5821	50.1503	44.4715	26.8926	40.7077	42.0356	4.43666	53.6746	43.2472	37.0714
GPR176	1.1551	1.86998	5.70391	4.64999	8.05085	5.88697	3.71255	5.91727	3.49666	2.34194	7.22174	4.62934	10.574
C7H15orf52	3.21967	7.15844	20.2439	3.96151	2.35208	2.3257	1.50684	2.48654	2.21456	0.683586	4.20034	1.80093	4.81053
BAHD1	15.2371	20.1337	67.6977	11.7426	7.55119	8.76015	6.70363	11.3403	7.19169	6.62645	9.23289	6.36775	9.65782
RHOV	60.5392	60.0554	160.75	32.8144	28.1994	18.596	22.6024	24.0384	14.8002	17.2588	30.6233	16.7772	19.7084
CHAC1	149.899	375.576	0.115073	92.8854	72.9348	157.936	90.2894	52.74	35.8008	58.8941	77.1474	45.2451	44.7461
EXD1	0.0920195	0.144045	52.0555	0.365324	0.289338	0.716056	0.263094	0.307182	0.377231	0.167842	0.59726	0.416875	0.796476
TYRO3	48.9203	52.8216	53.824	33.1235	22.9314	23.7988	22.5801	31.2459	13.1435	17.1961	31.2238	18.2806	18.5945
CERS2	44.549	59.549	101.511	35.9387	29.2018	25.5975	25.4591	33.5385	24.5116	15.8096	33.9854	17.9918	28.5157
FAM63A	85.4819	94.0876	65.7665	61.4832	45.4765	44.9368	45.9511	48.7155	32.1182	32.3006	55.5388	40.161	39.0219
RPS29	96.9053	138.405	412.354	143.825	264.143	649.23	280.939	378.424	846.321	187.074	485.848	441.91	570.121
ARF6	274.099	366.96	1.93707	210.228	206.642	116.241	190.433	119.771	161.315	129.657	158.554	116.324	130.783
LIPC	3.05976	7.52299	0.449203	10.996	15.0849	12.2873	8.3032	14.6999	16.5465	5.52798	18.0988	15.3294	18.4835
UNC13C	0.732236	1.13458	1.64003	2.35305	3.68409	2.64212	3.73558	3.44134	2.75488	1.30385	2.19072	4.2686	2.91981
LOC105607297	1.58336	1.86421	2.0704	4.81932	2.78373	5.75329	3.78649	2.77985	4.37238	3.42285	5.68286	4.71375	6.09103
USP50	2.7522	5.95227	3.52667	17.5904	14.7058	21.7595	12.1721	12.238	8.69605	2.28484	12.1383	10.5312	17.8042
ATP8B4	2.3805	6.47661	7.88623	9.33441	14.4165	11.5604	8.2624	18.2571	24.963	2.00801	19.7271	13.0231	24.0386
ZNF687	6.48123	9.80738	0	4.71026	3.0573	3.07431	2.4533	3.53245	3.25896	2.31785	4.11414	1.96458	4.07912
C7H14orf105	0.0346298	0.0917373	27.2281	0.302462	0.347736	0.525304	0.57481	0.91133	0.61	0.141534	1.17872	0.665631	1.19895
MNAT1	39.9908	49.7136	12.6157	117.898	123.326	158.672	141.933	130.514	136.155	27.9885	135.132	160.067	174.021
LOC101118878	9.99631	13.6467	10.8269	6.38304	5.71342	4.05336	4.98261	7.84434	3.71613	2.87106	7.22967	2.79417	4.68889
WDR89	14.9273	17.1521	101.226	30.5301	29.4374	40.2326	37.6879	40.3339	31.0274	20.2994	26.4581	32.5712	40.5915
HSPA2	84.661	74.3695	7.13431	31.6258	42.2991	17.9195	31.6098	42.0542	28.1564	24.4605	30.1714	24.3452	15.6821
SPTB	4.57532	5.52403	30.3013	3.59051	2.58391	1.89728	1.87518	2.48901	1.96344	1.658	3.79839	1.70231	3.53102
LOC105615749	41.9028	23.0321	0.37928	18.1814	18.8363	11.0544	12.6975	15.6843	13.2932	7.37088	17.881	12.7393	13.6374
LOC105613572	0.267614	0.42536	155.193	1.92185	1.03509	1.27583	0.81048	2.35846	0.879946	0.715914	2.45869	1.49872	2.83108
ZFP36L1	74.559	145.861	175.431	100.323	64.4155	67.4984	53.6516	55.2373	51.2207	4.9573	70.5314	40.298	47.8349
ACTN1	137.772	183.256	0.866582	102.789	82.7798	67.7704	53.053	72.8169	82.3794	31.5109	88.9982	55.5958	83.9527
RIIAD1	1.29556	1.51649	4.20407	3.39175	2.1178	3.22101	2.72866	3.03635	3.36833	2.28369	3.26837	3.20306	3.23082
RGS6	7.67913	16.9679	38.8273	40.0261	37.6273	34.9688	22.3209	80.0032	152.896	6.36382	105.528	53.106	133.904
FCF1	64.8655	50.8369	14.3932	97.3648	127.048	130.999	135.95	130.679	141.066	114.695	139.006	152.648	165.131
LOC101110679	15.4069	9.2146	11.6614	9.86186	7.88379	7.22205	5.95031	6.99945	4.41413	2.49008	7.43857	5.75638	9.82561
IFT43	20.3072	36.9296	55.0379	72.9723	58.518	73.5486	51.3613	90.3868	63.3704	28.8441	92.5075	51.3568	95.5327
IRF2BPL	37.5996	53.414	8.38911	24.3742	20.9397	13.0643	13.1763	13.0115	16.9312	5.11317	21.081	8.00742	15.5807
SPATA7	8.95352	21.8778	1.93958	38.5171	26.659	37.9651	25.1003	29.8681	30.658	12.1946	31.4188	27.551	44.2236
RPTN	1.7061	2.84873	4.49479	19.1159	2.65342	10.5201	5.41994	15.9217	7.09613	9.19742	8.9104	6.74276	2.31204
EFCAB11	8.28422	8.5033	34.7782	18.3967	14.9474	19.1808	14.2562	20.7036	15.7234	10.241	16.6751	15.3528	16.6783
SENP6	27.8188	44.3146	1.1143	69.9555	83.0163	92.4272	85.8954	87.0141	106.697	24.9631	116.288	138.824	135.755
MEI4	0.869845	3.51265	5.25179	5.89877	8.85293	3.95384	5.20818	6.64792	11.2413	0.945931	7.1157	6.73618	12.028
UBE3D	7.76649	11.7603	0.28306	27.3289	23.7493	39.2703	23.0521	37.861	46.3181	3.94729	45.9774	37.8155	47.5264
NKAIN2	0.490431	1.87384	32.892	4.613	6.31368	3.65839	4.00435	5.63355	13.0248	1.93434	8.17434	8.24505	10.5307
FABP7	48.8006	23.8051	0.935801	59.5808	80.2084	112.717	96.8986	8.83146	11.4616	10.9182	12.7422	13.5416	7.28592
LOC106990793	1.08847	1.44173	56.1105	3.56508	5.16135	5.60201	5.88375	7.74405	10.3536	1.56714	17.9598	5.81164	8.53804
LOC101122794	55.8662	55.5654	2.68897	24.0612	30.9006	15.2248	22.861	33.4013	29.7973	15.0824	26.6556	19.6198	25.1666
CEP85L	2.42712	3.64267	35.8838	4.88998	7.36206	7.69946	6.90131	6.755	9.50658	1.48129	10.2204	10.7746	16.8543
TSPYL1	22.7728	31.5741	0.481189	15.5281	15.6535	10.8495	15.6841	15.7779	15.2427	6.24706	18.9833	13.9112	15.1997
PPIL6	0.690646	1.42446	0.913201	3.00174	2.63095	3.7523	2.13762	4.89103	3.12832	0.938464	4.8982	3.21695	5.39434
LOC101108397	1.12346	1.72059	2861.32	3.24017	4.52035	4.23007	3.33703	2.57839	4.34385	1.08531	3.49759	4.70881	4.77092
LOC101102105	2438.74	2326.86	0.0106385	889.959	816.614	486.286	886.357	847.227	556.371	1028.49	983.68	1072.27	469.43
THEMIS	0.0850717	0.112681	8.52104	0.284828	0.85425	0.506968	0.497945	0.437343	0.431577	0.0568955	0.480255	1.21126	0.454076
SLC18B1	8.41437	18.6289	3.26699	43.3824	23.538	43.063	27.4337	34.7863	29.7633	8.07273	43.2419	28.6218	57.8588
PDE7B	3.99633	7.72584	6.87413	18.0735	20.0141	21.37	17.671	31.075	38.2183	3.7001	29.6554	28.3947	66.5499
SLC35D3	5.04705	5.41541	147.689	0.99668	1.72426	0.635876	0.205079	0.383112	1.26808	0	0.519692	0.139264	0.366862
CITED2	95.8907	126.414	2.38426	68.4813	68.7647	53.3257	71.2777	51.8142	57.9782	20.8289	72.4633	61.8468	57.4604
ZC2HC1B	3.07175	7.99703	0	15.0592	10.9908	15.5319	10.3331	28.5664	17.1655	3.88309	20.2252	18.2986	32.2921
GRM1	0	0.0301532	0.0524751	0.110463	0.0507989	0.106886	0.298318	0.111459	0.171095	0.315779	0.176393	0.345737	0.207989
ADGB	0.0419624	0.0444648	0.120475	0.171036	0.290274	0.318267	0.278609	0.390356	0.165573	0.162149	0.195086	0.454071	0.411633
RGS17	0.0722542	0.0957039	3.02865	0.560959	0.577747	1.06994	0.946839	0.604343	0.42425	0.0715899	0.699822	0.960175	0.799119
LOC106991323	1.74207	2.87024	36.47	1.42258	0.758504	0.736603	0.334076	1.09216	0.658634	0	1.19933	0.423476	0.79683
LOC106991303	38.2975	34.961	12.722	19.7871	12.8389	8.1433	7.00564	15.8897	18.4456	1.95072	21.4947	7.62883	16.8596
PARK2	18.058	26.9085	16.2996	83.9494	66.0051	107.257	74.1273	107.082	101.082	5.74269	104.655	94.0287	136.628
GJB4	16.0611	10.0368	0.916543	5.93492	4.66373	3.1235	4.0115	4.63752	1.77003	2.89196	5.40188	4.36835	3.68335
PDE10A	1.61037	2.63891	79.6732	10.7893	5.64357	8.70189	7.8549	5.69856	7.38984	1.72597	5.17626	4.99724	16.2319
RNASET2	56.3884	107.316	194.644	68.8073	34.8367	43.3525	35.129	53.9452	36.213	28.4462	51.9532	31.9438	44.9463
SLC39A1	139.689	199.484	2.92566	103.809	82.9845	64.1249	72.8414	68.7676	94.5555	71.258	105.05	52.6311	103.335
KCNQ5	5.08178	7.13745	1.63503	21.4109	19.4487	26.2841	14.0892	37.9783	37.2653	1.53902	55.4659	24.6006	34.718
B3GAT2	2.55809	4.44245	147.722	19.1155	16.4905	20.2644	12.2169	11.0634	11.9361	3.25271	22.936	16.9971	20.1735
RPS27	219.421	143.911	0.118255	292.843	521.195	559.029	618.944	845.032	583.325	415.148	364.557	911.253	417.554
COL19A1	0.181248	0.323575	0.0597919	0.401498	1.40677	0.930691	0.936282	1.55296	1.42143	0.3455	1.40003	1.22299	1.26186
ADGRB3	0.0836733	0.0633309	59.9312	0.200104	0.346752	0.278458	0.454255	0.482826	0.454803	0.430805	0.486254	0.884999	0.525933
GJB3	62.1368	47.5237	10.4415	16.4653	22.8634	11.221	18.9288	12.766	10.2467	6.16747	13.7195	18.7713	14.092
C9H8orf82	12.9	13.1661	76.3363	6.36667	4.38687	6.89291	5.82782	5.35341	5.35397	5.08849	7.1152	6.1643	6.628
LOC101111462	60.0498	84.7724	44.4784	43.6581	20.2809	21.5767	10.4147	28.4883	23.4083	10.5681	44.856	13.1571	33.6269
EPPK1	28.9514	40.2402	6.82518	20.3441	10.4271	13.246	6.85993	12.1214	4.88329	3.04763	18.4357	7.42632	9.57542
LOC105616111	7.53043	12.9942	70.5029	5.93356	2.38953	5.01535	2.11243	3.72078	2.23919	0.102677	5.62079	2.16405	3.08956
FAM83H	47.3067	70.8063	22.1846	43.2358	17.1982	25.8647	16.2872	25.4703	15.4743	8.61706	28.3595	16.7294	28.207
TIGD5	16.5337	23.4977	11.4646	5.91941	5.73353	3.53446	5.46534	3.00828	2.70774	0.896563	2.44844	2.79944	1.0314
LOC106991335	13.07	15.0077	15.2394	6.63853	4.56359	3.26019	4.55906	3.33769	4.63766	1.99138	5.62044	5.48902	5.69707
THEM6	20.2522	17.7672	5.30104	8.16788	7.14069	3.13478	8.42509	5.04366	5.18895	1.82418	8.15184	7.98896	4.30012
ARC	4.5737	5.36854	0.0375865	2.38169	1.16166	0.886377	0.617217	1.13786	0.524003	0.773697	2.77833	0.952985	2.46753
FAM135B	0.0400753	0.278678	0.245402	0.656295	0.380061	1.00956	0.411374	1.60648	0.607094	0.148901	0.316066	0.542065	0.722651
KCNQ3	0.569093	0.649818	74.3834	5.54187	3.10907	6.52764	3.00016	3.09858	1.63158	0.524974	2.47632	1.22939	1.61362
NSMCE2	116.047	183.146	37.8063	388.872	356.958	536.348	353.515	396.897	394.66	66.8807	472.021	410.064	536.314
TATDN1	51.484	72.1882	0.07842	153.582	154.046	189.783	150.204	157.585	132.833	46.3579	172.56	137.529	196.109
FER1L6	0.0940642	0.321863	3.01322	0.639	0.349833	0.603024	0.362945	0.642844	0.695912	0.442697	0.585684	0.491073	0.701094
ANXA13	2.86135	5.38578	28.1713	20.2417	10.3616	15.0664	9.03411	15.2997	6.36663	3.05887	16.3366	7.6477	11.297
LOC101104627	20.0821	36.4149	66.1707	18.1225	11.8231	14.1314	9.25756	16.4174	10.6515	3.41413	23.0085	9.70683	14.2178
SHC1	37.4726	90.1657	0.468058	43.433	31.0808	24.116	20.8774	34.2706	34.3938	6.89322	41.041	20.6167	44.4291
XKR4	0.345497	1.67796	117.555	3.35291	4.97911	3.05718	3.74775	4.75756	4.34127	0.320925	6.31022	6.68191	8.55601
ZBTB7B	102.102	107.222	0.0810428	55.4582	36.783	37.3759	34.5918	37.4961	20.9143	7.92348	54.0693	23.2647	35.0872
CPA6	0.162017	0.386278	0.163092	0.80188	1.51844	1.54482	0.905863	1.34852	0.730603	0.722374	1.77547	1.015	0.79466
C9H8orf34	0.279469	0.246779	60.3758	0.59667	1.03937	0.968983	1.13936	1.23147	0.498845	0.207674	1.20646	1.00804	2.44582
EFNA3	81.0855	68.7441	0.0489632	27.95	28.8942	16.3261	23.3622	18.554	13.8368	20.2195	22.0131	16.3855	16.3187
KCNB2	0.234924	0.228189	10.2286	0.398973	0.532958	0.576963	1.22456	4.87878	6.57692	0.739025	11.0778	1.29334	5.41107
C9H8orf89	21.2804	40.7654	11.7363	96.8685	76.0243	110.631	65.7042	76.7005	66.6188	15.8651	90.3482	69.5796	117.096
RPL7	20.1271	21.4173	932.446	41.2324	60.4301	62.3608	83.8175	79.5823	59.5941	54.7426	44.8711	68.5032	49.9142
LOC101113339	1275.76	1529.35	2.22871	2912.48	3009.86	3011.56	3192.08	3447.29	5995.21	5952.36	1972.5	5241.77	3692.23
COLEC10	2.56464	5.03791	21.3891	23.2542	18.3326	25.9278	19.3292	21.7082	22.5421	1.59893	28.7254	44.8089	45.8703
TRPS1	20.02	32.5991	0.0227192	88.9098	112.989	111.236	87.1213	98.2325	132.259	10.5473	84.4119	138.511	126.486
CSMD3	0.0953803	0.108288	2.82292	0.337193	0.319254	0.44783	0.543603	0.444751	0.480033	0.600771	0.46002	0.918286	0.62245
ZFPM2	3.08193	6.49923	0.211362	8.75625	12.5177	14.3092	9.95492	33.8849	46.6115	2.86275	32.9924	29.7542	41.0081
RIMS2	0.249503	0.437084	639.314	1.0193	1.02371	1.21217	1.42032	1.6846	3.69745	0.466507	1.83081	2.58984	3.7154
PABPC1	465.414	507.832	18.4634	304.125	310.438	251.984	332.685	241.848	283.693	227.863	259.405	221.888	253.954
RPL30	25.6311	35.9834	1.2198	75.4817	58.5124	76.5318	48.7048	129.974	66.912	89.2644	82.7614	44.3979	99.1682
RAD54B	1.1315	1.86048	0	3.8267	3.78188	4.67672	3.90286	4.25043	3.42955	0.786457	4.47005	4.02758	4.90388
CNBD1	0.0829223	0.146446	2.94578	0.764492	0.986863	0.598981	1.35226	1.59014	3.4277	1.56104	2.61597	2.7155	7.69571
LOC101107157	4.12756	8.36639	8.43255	18.5413	11.327	15.427	10.581	20.4895	10.9868	6.1654	24.9904	8.84495	24.8399
WWP1	10.5823	23.0046	13.132	57.1844	45.3783	60.185	40.6427	58.8515	70.6895	7.10578	57.275	65.8555	93.5364
ENOX1	20.5347	20.9025	2.11738	57.1468	46.2569	42.5148	36.4917	40.7785	40.4134	24.9739	61.6241	41.6924	46.149
MEX3A	1.1585	3.54111	251.375	0.778346	0.994281	0.820737	0.934232	0.436314	0.313951	0.231777	0.665844	0.317207	1.02845
LMNA	239.825	243.486	37.0869	100.493	94.0856	58.0142	66.7979	83.5222	120.943	26.0802	166.533	86.8368	147.539
FOXO1	32.9171	41.5681	41.618	25.4037	19.496	19.752	12.7524	22.9209	18.3289	11.8616	19.9478	9.63692	27.144
SLC7A1	22.8399	47.228	39.3791	19.2328	11.1372	14.4509	9.19382	17.4728	13.2443	3.93339	15.5705	8.27824	17.5865
MEF2D	28.382	40.3118	22.1613	23.7735	15.5389	17.2505	10.374	21.7844	17.023	10.6979	24.1467	12.6909	27.8737
RPL21	34.6678	32.8622	427.251	73.3606	51.1611	116.049	100.245	244.843	140.63	153.912	83.3083	136.411	79.2511
GJB2	204.058	372.983	0.0409334	175.434	132.287	56.2044	76.3911	119.157	108.054	66.4858	70.7157	67.97	63.4653
KLHL1	0	0.0722602	230.602	0.111181	0.182604	0.177332	0.552856	0.36059	0.59965	0.737826	0.271745	0.838894	0.566639
CRABP2	163.447	260.142	22.4319	136.316	130.991	93.4442	102.771	118.912	81.3505	75.6074	122.239	95.283	92.3815
LOC101103163	36.9475	34.9297	182.723	63.1439	89.9322	95.4633	107.824	99.6876	84.0412	49.7875	66.3754	106.074	80.7229
HDGF	147.345	183.34	0.523179	92.6393	77.4921	52.98	61.8216	49.9254	53.785	20.0848	57.6605	29.5037	51.5149
GPC5	1.11564	1.68882	1.65319	7.87367	8.12423	9.78922	7.75367	7.91298	8.89954	2.23545	10.6513	8.89254	7.77404
HS6ST3	3.81489	12.0071	0.190185	75.4371	62.497	73.7068	23.5933	36.1077	44.7639	3.14361	40.7645	37.1612	41.847
NALCN	0.0984071	0.177743	0.202801	0.312547	0.638809	0.591285	0.429851	0.59131	0.605126	0.365634	0.579304	0.776988	0.516221
FAM155A	0.486516	0.465409	80.7544	1.02298	1.62845	1.84501	2.12514	0.959423	2.13296	1.18502	1.43609	2.03963	1.91057
CUL4A	72.9823	91.0122	30.4294	54.3805	34.9501	36.0118	28.2792	40.5355	31.6029	25.9295	50.4249	26.1695	46.1368
CUEDC1	26.1486	26.6352	1.55286	12.9592	13.8667	7.79233	8.60078	14.5289	17.7601	10.2993	16.6943	8.15195	15.7131
HSF5	2.00704	3.67205	12.2448	8.47061	5.88018	9.40259	5.47459	10.1801	7.73205	1.23392	12.3708	8.30562	10.0607
BCAS3	18.1242	22.0577	0.841531	57.0146	64.2303	92.3877	50.9985	86.4792	80.1051	7.24038	82.4908	86.0522	83.5168
LOC101110777	0.785097	0	0.165199	2.44899	1.25136	7.4129	11.5619	212.787	28.4491	39.5885	38.5481	342.055	14.8852
ASIC2	0.713357	1.85475	14.8011	3.07682	5.21763	4.20817	3.83153	7.98781	5.69646	2.02223	5.35193	6.69597	7.85149
RAB11FIP4	7.87131	12.6491	16.3368	8.04602	4.26196	5.39311	3.99445	4.21515	5.5461	1.89239	6.24639	3.09022	4.46687
KSR1	19.5474	31.0185	9.95613	86.5625	45.8325	70.3286	35.9293	113.917	57.2059	10.2651	110.865	78.0873	111.225
LYRM9	7.69207	11.1944	37.1821	6.41883	5.41173	5.65361	4.38722	3.958	4.14253	3.60436	7.44342	3.62742	6.74977
TNFAIP1	20.8712	32.7448	43.4395	21.8413	13.2628	14.6347	11.2391	13.8394	8.31104	8.76525	17.3525	8.57125	18.3384
PIGS	41.2169	48.5313	18.8503	29.421	25.6945	21.4812	20.0769	30.7832	20.2322	14.0343	29.4382	15.2286	24.569
KIAA0100	11.1203	23.5091	30.5818	14.1429	7.14214	9.43322	6.49622	10.9551	6.85149	5.20693	14.8047	6.15602	11.71
GIT1	24.6873	35.6721	60.5529	18.6257	10.6205	11.1244	9.01452	16.3245	11.8508	6.23009	21.3732	8.22734	16.3368
PRPF8	33.5547	64.8887	28.8864	32.1114	20.0374	20.0555	14.9789	27.7578	21.5475	21.2269	32.6602	12.8334	26.873
CLUH	23.1791	31.0187	5.33821	14.6763	7.51105	8.57325	5.42129	8.43534	6.78904	4.35058	12.6875	4.90609	9.7575
ASPA	5.91329	5.74686	172.077	11.2565	16.5526	14.8235	10.393	10.6642	14.0033	7.85234	12.665	11.259	23.4208
TAX1BP3	166.275	178.327	5.24959	114.089	114.015	60.7518	84.8247	94.6621	119.881	67.4567	99.3605	62.5764	93.6742
P2RX5	3.43703	6.44648	65.3944	2.78808	2.70776	3.80934	1.94829	2.42464	2.34777	1.97892	2.24351	2.29741	3.08469
GGT6	82.0353	55.0184	162.425	27.1189	24.9293	13.4247	21.1031	25.2032	14.8639	21.7922	25.9494	18.1909	11.2728
KIF1C	130.027	141.723	125.535	61.3797	49.9467	34.3289	44.4515	49.6045	42.6484	37.0493	50.2505	36.9188	51.1629
SLC25A11	120.344	133.227	1.4459	63.8602	71.7288	43.0365	55.9914	56.5993	47.5255	56.3883	61.356	43.4228	42.2852
GP1BA	2.67892	2.92069	58.2295	0.947329	0.810679	0.889959	1.0929	0.402147	0.258204	0.187804	0.975629	0.422807	0.546873
SLC16A11	82.635	45.4533	16.0381	23.319	30.7465	16.0218	18.2354	30.2115	36.9921	11.6542	32.3019	19.5119	18.4764
DVL2	12.5827	19.395	218.124	8.46735	7.21095	6.58696	5.25804	6.27924	4.32613	4.0973	6.47218	3.22073	6.20593
EIF5A	202.805	204.615	31.0247	92.1714	92.0033	45.8338	91.4521	62.5917	69.7971	25.9631	73.1255	54.3201	50.7882
POLR2A	19.0379	36.8977	20.5355	15.9154	10.3708	8.87437	4.71749	9.75707	8.91138	7.35312	12.7136	5.64092	11.3207
ATP1B2	7.95958	17.9126	103.147	8.71814	6.85452	4.10281	2.66668	5.95911	2.83137	1.34949	6.28719	1.48538	5.96415
TP53	93.6757	110.33	18.7548	64.2032	51.8689	35.471	40.4104	48.2913	46.6655	28.0647	52.6665	29.8047	40.851
KDM6B	15.9705	21.8314	50.6421	14.2089	8.04753	9.96733	4.96914	8.95142	8.69405	6.1948	13.675	6.3989	14.1533
CHD3	42.2007	59.7714	77.9394	26.2272	21.4742	17.8084	13.3226	19.064	17.8135	15.3664	20.9741	11.5443	16.5502
ALOX15B	57.9473	52.9382	19.2885	37.2123	32.8173	32.5262	28.0693	42.4615	26.2741	19.6062	34.819	24.7656	33.1275
BORCS6	18.6256	17.1322	54.4973	8.04921	8.98347	5.22044	8.19233	5.77867	6.37949	8.09781	7.03342	4.37383	5.13124
SLC25A35	53.2709	74.9967	0.344997	9.89446	15.7116	5.53234	5.51188	18.9881	36.068	1.86087	20.6815	6.01964	5.77063
LOC443471	0.163485	0.108272	1.07062	0.014874	0.0342008	0.0221422	0.00892648	0.062534	0.0287978	0.0151858	0.0169655	0.0290964	0
PIRT	1.10707	1.8183	46.7788	0.859497	0.741113	0.463816	0.386863	0.144541	0.249613	0.109689	0.0490177	0.0630502	0.10647
SHMT1	37.112	40.4983	11.229	21.6095	21.7856	12.2005	16.2477	20.3384	14.4414	4.79483	18.5561	10.1477	11.5592
SMCR8	6.6965	10.4447	39.7446	5.53866	3.6296	3.46296	2.50128	4.80854	2.88193	2.72136	5.27508	2.16693	4.4322
LLGL1	28.6918	40.8259	18.0779	20.5281	14.0643	13.7816	10.5293	13.7372	14.3255	14.8425	15.3667	8.82339	11.0985
GID4	16.0643	21.0782	73.9049	12.8994	10.0176	9.90988	8.44384	10.1493	6.37348	5.365	10.7915	7.15508	10.4392
SREBF1	63.5397	68.6907	83.1495	33.5839	26.1139	22.7234	16.3419	25.9308	18.1737	17.7656	41.0082	21.5885	33.9397
USP22	36.9802	75.3791	266.56	38.3717	21.5648	19.067	19.0338	20.4916	15.4797	3.64146	23.3204	11.9311	21.7856
NATD1	238.057	241.314	51.6938	96.6533	73.1771	49.0212	58.4475	53.7676	45.4993	48.5876	61.172	49.2856	47.5995
LRRC59	34.9729	61.1849	53.5336	25.0569	20.84	11.4937	18.0949	23.3447	19.2634	18.4959	20.5909	10.4946	17.5744
PPP1R9B	58.9443	60.3167	25.2087	33.6741	29.6351	21.3647	20.527	25.9681	25.0257	18.3339	28.6965	15.6413	20.1477
ITGA3	15.4284	31.7357	225.889	17.2762	9.1155	13.4369	8.54995	10.6319	6.49584	1.52099	17.5921	4.97137	12.7537
DLX3	193.514	227.004	12.1107	88.9743	65.2886	63.4486	57.3476	59.8665	46.7223	63.0581	31.2449	22.5797	40.9752
DLX4	9.85999	12.0617	8.07768	6.67307	6.55454	6.36529	6.01618	4.044	4.13202	4.19672	3.59998	2.23443	4.90016
NGFR	3.54977	6.03786	13.2169	2.85193	2.77023	0.735613	1.03371	1.94693	1.88612	0.504506	2.86646	0.966645	2.85424
HOXB2	15.3672	15.2015	155.733	8.40053	9.98351	7.65784	7.25068	1.90479	2.92393	4.48105	5.27535	3.23121	2.80614
NFE2L1	112.298	128.138	4.76319	66.3551	49.535	40.1373	43.9151	57.7545	42.1459	4.64176	91.1443	41.1194	52.5548
C11H17orf96	2.60792	2.81799	8.76536	1.89817	1.26343	0.855149	0.89934	0.88204	0.773698	0.280494	0.284878	0.39086	0.198008
RPL23	16.4248	19.8155	97.4864	38.377	31.6321	53.8428	36.8322	94.8871	33.3181	29.6194	36.8252	39.3238	37.5788
LASP1	60.5313	91.0892	59.6647	60.3563	48.3342	32.4349	36.472	39.0473	48.4552	26.6274	48.6056	32.1125	52.7487
ERBB2	50.184	63.6835	90.5227	33.9315	20.1179	21.8795	19.2284	22.4084	11.3111	14.6126	26.0819	11.5922	16.9706
ORMDL3	74.9227	83.1685	326.114	45.0756	41.1652	25.948	38.9955	32.6376	38.5959	10.8996	46.6783	22.173	60.6699
GSDMA	285.07	265.851	77.2108	175.958	129.332	92.5648	138.848	139.507	65.0095	84.1471	120.264	74.3174	89.12
THRA	60.5093	82.5603	65.6637	40.7572	28.4244	23.4434	27.6675	25.9003	18.7206	4.29029	22.802	13.8468	18.3151
KRT40	44.7571	61.8625	3923.62	31.187	32.0307	31.0636	29.8784	17.4506	30.2457	21.8254	23.1543	11.5915	18.2628
BIIIB4	2173.13	2749.11	3814.68	573.994	1201.65	391.748	295.28	1042.71	1049.52	927.81	835.894	766.388	740.801
LOC101111893	1949.34	2306.46	25753.3	767.237	1345.78	566.367	445.498	1250.54	955.152	671.042	983.627	871.378	879.163
LOC101112404	13403.8	22281.2	1156.27	4141.02	7880.88	4369.63	2675.61	5148.18	5190.13	4269.73	5178.13	4115.06	4737.75
LOC101113159	646.195	889	7770.58	239.272	547.098	307.715	174.358	576.685	451.101	303.143	263.09	386.719	339.216
KRTAP1-1	4382.08	4242.89	4934.31	1333.85	3127.45	1118.81	826.529	1687.46	2087.37	1233.29	1952.39	1343.69	1361.01
LOC101112657	2543.02	2797.85	313.679	478.775	1193.48	381.605	242.79	1117	1214.68	1236.07	592.715	695.073	950.487
LOC101114537	179.208	129.796	2076.96	29.8054	85.4952	13.5039	12.5032	85.16	98.6225	57.6037	52.9844	76.3426	36.8472
LOC101115634	615.767	1085	607.035	124.48	322.24	22.287	5.78798	36.6813	192.263	36.2949	93.1207	73.8197	103.355
LOC101116068	230.087	345.471	25.6495	106.377	130.023	32.8356	27.579	87.1613	113.422	21.6445	34.6738	94.2716	35.9269
LOC105611408	17.8529	27.2728	340.506	3.81161	10.2693	1.71945	3.88182	5.00173	8.55377	6.7512	5.13804	3.27623	6.69611
LOC101107617	203.917	271.791	493.918	33.7222	65.4708	28.377	27.7235	30.7518	38.9008	28.5661	39.7836	19.1829	35.3761
KRT15	616.67	377.239	4202.24	227.456	318.905	158.619	265.772	281.577	190.185	174.065	263.703	212.997	176.526
LOC101118459	5085.36	3627.95	622.999	2184.71	2982.1	908.134	1912.14	2362.16	2023.07	1179.22	2279.4	1604.3	1305.86
JUP	455.958	566.021	18.6711	259.512	186.71	161.838	131.246	218.275	144.058	249.209	249.472	115.942	168.401
KAT2A	14.8311	27.6234	161.62	12.9653	7.941	7.97021	5.97469	9.49047	7.81646	6.23444	9.96896	5.06686	6.76845
RAB5C	114.622	147.63	302.71	71.0858	79.6243	37.9686	63.3337	46.3052	72.9568	31.192	71.5718	40.0219	54.3563
PTRF	166.084	249.988	14.3484	94.4014	98.3676	46.9836	69.6201	70.8363	125.568	23.4161	131.123	41.0021	122.951
RUNDC1	8.24047	13.8761	183.879	7.90741	4.96811	6.3061	3.93848	5.63124	4.34815	1.56521	8.49777	4.41954	6.87668
VAT1	195.612	149.575	29.6563	75.3059	97.6868	43.9056	80.6681	74.1796	60.5474	52.6448	103.109	65.4356	76.6341
ATXN7L3	23.7017	32.4511	6.3938	18.7808	12.6436	10.7941	9.66757	14.701	10.2338	10.7535	14.7301	8.84382	12.5677
SLC4A1	3.79283	6.62448	4.6875	2.43582	1.3691	1.39	1.03952	0.386874	0.576403	0.0690801	0.432184	0.105887	0.241389
FAM171A2	3.96205	3.34426	30.2236	2.06387	1.69022	1.40993	1.93427	0.784498	1.1495	0.101027	1.38665	0.691323	0.868548
FZD2	29.6726	31.0206	7.44635	14.6615	22.5166	12.1503	16.453	4.62877	11.1593	11.1154	6.55869	5.09109	2.4846
NMT1	12.0253	20.6603	0.108774	37.6319	26.3154	38.4592	22.8381	44.1932	36.8391	8.69863	50.2541	39.2889	56.4843
EFCAB13	0.108728	0.259228	28.129	0.69641	0.970487	1.04849	0.683907	0.745278	1.07253	0.678691	1.22761	0.882405	2.11747
MRC2	12.8273	29.6725	71.5641	11.487	6.27419	4.54185	3.74207	6.57475	6.50421	2.79153	5.76195	2.95153	6.46007
CYB561	29.0319	59.0662	17.2253	10.474	7.93453	8.70261	8.6248	11.06	19.8073	0.559548	15.8365	6.90914	12.1901
FTSJ3	13.6171	22.042	4.8646	10.789	7.45018	6.95097	6.84142	8.83658	5.96118	7.27418	8.50397	3.68348	8.47281
PITPNC1	4.44485	8.58192	27.1421	21.7967	16.8201	24.6053	14.4182	34.5949	31.489	4.51613	35.6619	23.4984	60.9561
OGFOD3	26.5164	22.9176	4.76852	16.0956	14.2214	10.0391	10.5988	13.0954	11.614	10.8032	9.68941	9.32922	9.74766
UTS2R	6.10818	2.75921	121.538	0.925141	1.29998	0.803375	0.431833	0.950772	1.09461	1.6267	1.58284	0.251354	1.52802
FASN	124.666	105.559	16.2292	51.5365	36.1543	32.2925	26.2075	48.8218	33.6454	30.58	68.7685	32.0927	41.845
SLC25A10	16.7857	25.0126	3018.48	14.593	7.2832	11.1146	9.30097	7.22915	10.8416	6.87199	14.0644	10.0688	7.39897
ACTG1	2883.98	2863.08	5.132	1437.59	1599.47	964.222	1494.68	1659.12	1649.28	1244.27	1421.77	1602.79	1332.53
BAHCC1	3.72528	8.92587	32.4773	4.06714	2.52593	3.42108	2.24902	3.0028	2.28338	1.29974	4.77733	1.64944	2.81809
C1QTNF1	20.0821	18.8498	26.8578	8.13259	13.0983	4.94898	4.61687	6.14521	11.5964	3.25391	13.0994	3.49351	12.0346
LGALS3BP	19.6085	27.297	10.9716	11.1494	11.6583	6.44508	5.67944	7.98963	12.759	10.1118	10.4883	5.1715	12.4538
LOC106991439	7.94159	9.61737	186.619	9.46862	4.21935	3.35997	4.09668	8.60972	2.66458	1.74233	6.1535	2.90759	3.7097
PVRL4	153.85	209.668	24.6826	152.498	80.928	112.56	75.5636	112.938	65.0366	60.8946	110.093	57.8396	98.7309
UBE2O	12.6833	27.136	119.035	13.967	5.91328	8.89105	3.08143	8.94791	5.69163	3.06925	12.502	4.18938	8.64747
WBP2	80.8824	117.784	9.05009	69.3382	47.4507	44.5725	41.0722	52.2455	39.2279	9.88327	71.7699	33.7996	61.4633
LLGL2	9.81114	10.6534	17.8014	6.74988	3.76166	4.55457	3.18012	4.26468	2.74806	2.03521	7.3968	3.50463	5.53883
CASKIN2	13.5699	22.9275	39.6421	8.24141	6.15175	5.09323	3.4609	4.61382	5.33266	2.10904	7.75582	3.30433	6.20537
KCTD2	24.502	43.4553	1.09962	25.9948	13.643	18.3487	14.9152	20.2763	10.7941	2.36595	17.6981	10.0519	19.3039
GRIN2C	0.431949	0.756037	28.9093	0.0673699	0.103272	0.334301	0.0134771	0.0188826	0.108696	0.160492	0.3586	0.153753	0.20029
B4GALT3	27.2447	30.8259	140.99	20.4172	19.0418	14.7599	11.223	15.9144	8.65811	8.55483	19.2178	10.6919	13.9664
SLC9A3R1	117.499	111.3	36.068	54.8409	49.7004	27.8556	36.7448	53.8109	33.9805	28.5424	67.7988	27.9118	35.8478
CDC42EP4	19.0652	28.9758	3.59034	13.4021	8.49951	7.54786	7.61606	7.03075	6.65922	1.54389	9.3343	4.11817	7.11086
SSTR2	3.8179	2.30598	19.4734	0.933691	2.21506	1.059	1.78777	0.747708	0.258247	0.317755	0.0507133	0.17395	0.220306
TOMM40L	18.6035	17.6008	40.3623	12.8151	8.8956	7.46892	11.2461	9.09824	7.19768	7.34418	10.6181	7.86355	7.30833
FMOD	32.1295	32.4244	66.821	19.4954	15.7608	7.58475	6.04223	17.188	14.6197	10.2324	9.63939	8.95228	7.61911
PRELP	24.6333	64.4825	7.27424	20.5569	12.35	8.11069	7.62945	7.31048	9.27679	1.02572	9.29963	2.57001	8.19466
ETNK2	9.50808	13.8737	40.0734	4.52922	6.10199	3.3084	5.08178	1.60851	3.56754	2.72854	2.47073	3.10926	2.56482
C12H1orf116	21.2877	39.9033	0.104178	31.65	14.0873	15.0486	12.31	25.3147	10.3198	3.41525	22.4317	17.0783	17.1215
C4BPA	0	0.0220688	3.86932	0.654854	0.223074	0.45132	0.276558	0.611815	0.915686	0.64382	0.746935	1.11496	1.24985
KCNT2	9.25211	8.27704	12.4254	18.3551	15.9863	23.5664	19.5313	17.9339	30.137	31.9644	19.3746	32.6811	25.6437
MARK1	12.5355	17.2966	46.601	66.7223	54.6921	63.1289	51.6927	103.641	86.3092	10.9954	81.1354	73.3417	141.407
EPHX1	65.5188	40.1043	42.2462	24.1768	23.3564	21.8108	19.4024	27.8633	27.1164	18.1727	31.6737	19.581	24.3191
PARP1	32.6498	47.3936	46.733	23.157	21.734	17.0659	14.1861	16.9293	19.2243	9.16701	20.3781	11.6721	18.8627
LOC101117005	86.395	110.724	4.4932	213.441	219.104	275.123	218.548	219.728	194.543	150.759	254.152	177.255	344.557
RGS7	9.41959	12.2194	32.9722	21.5576	25.1365	21.5698	14.8888	104.719	115.908	10.7522	61.8349	64.5004	81.9517
NME7	39.8218	53.8858	38.8632	111.848	126.517	165.521	143.589	163.751	136.812	17.1693	158.716	193.187	197.892
COL8A2	24.0688	33.7125	0.19073	14.9007	12.2439	7.15419	9.15197	5.12458	7.25136	3.4949	6.89025	4.91062	5.61395
MROH9	0.800727	0.808075	0.251847	2.52549	2.12712	3.96615	1.3824	4.17711	4.27172	0.425017	4.40005	3.63739	2.88779
LOC101104591	0.520263	0.422359	4.41406	2.44304	3.05215	3.16405	1.30489	2.79375	1.96295	0.523794	2.64724	2.43732	1.86421
FMO4	5.25261	10.705	36.4142	21.5725	20.2225	23.6908	12.7017	24.8599	20.1136	4.87124	30.0247	20.5216	34.4719
MFN2	28.3427	36.2769	130.939	19.2118	13.3335	11.1145	9.8509	19.7528	19.0107	7.6983	21.1525	10.0388	17.0193
CLSTN1	84.3423	103.084	13.7523	60.2717	44.594	37.9236	32.6059	46.5968	35.3411	25.3294	57.063	25.7487	48.4613
CAMTA1	21.0479	30.3534	21.5822	64.0343	46.0502	76.7429	50.9093	65.5204	57.0044	14.4006	72.3972	58.2516	84.748
KLHL21	14.1567	23.7374	35.1876	13.1982	6.56645	9.30675	7.89762	10.9355	5.417	3.78243	12.369	4.83149	12.9647
ICMT	22.1064	31.9779	13.8002	14.9312	13.2376	9.38859	10.218	12.9672	10.7005	10.1932	12.8874	6.64816	9.09892
LRRC47	10.6167	14.3233	9.89317	8.89271	5.02946	6.05859	4.56216	6.24124	6.31764	4.6677	7.64826	5.0504	9.31014
PLCH2	7.17527	17.5458	59.3292	10.8913	3.83175	6.51195	2.82169	6.60576	2.73669	1.35198	4.7519	3.46361	5.95695
SKI	40.6442	67.4809	11.6983	42.5234	29.02	21.9784	20.3041	25.5893	22.3741	13.5339	30.3025	13.3277	33.5005
C12H1orf233	9.11936	8.5722	40.9127	4.3679	3.67602	4.33485	3.08394	3.74476	4.64292	4.24086	4.39595	2.09422	4.2437
DVL1	33.7544	56.657	12.1511	25.9488	13.299	15.1257	10.4445	16.9996	13.3166	4.52186	23.2977	11.3142	16.214
B3GALT6	7.56411	11.0486	32.4147	7.92097	6.23787	4.53522	4.54473	5.4893	4.9294	4.37677	4.46774	3.19264	4.57178
AGRN	30.7201	40.1001	30.2117	24.262	14.4696	14.8168	12.1375	18.4666	11.2046	9.68091	16.7046	8.43673	15.6653
SAMD11	41.0841	48.3753	85.3129	24.441	17.1066	22.2575	15.9414	11.2668	10.727	15.3652	9.77065	5.30382	9.57934
PLEKHM2	74.9779	99.9538	154.158	69.0749	41.7227	48.0759	37.0686	54.5975	33.8971	19.0254	59.0259	28.4811	59.9471
EFHD2	115.095	130.082	1.53014	62.2784	57.8496	40.8277	47.3313	58.0344	56.0301	50.5004	71.4499	42.2017	57.7178
LOC105616540	0.640255	2.24261	3.42308	0.890591	0.53973	0.986627	0.47233	0.50504	0.501246	0.33833	0.850454	0.648247	0.923622
SERPINC1	4.19483	4.56742	6.13685	15.7317	7.85334	15.3687	6.05604	12.7928	9.81881	5.52113	13.5759	8.8577	17.9491
RABGAP1L	8.03106	15.6512	14.6664	37.0959	40.7939	58.68	42.9086	44.9276	43.9239	3.24221	49.3617	50.0192	48.7944
NPHS2	8.08951	9.12274	81.5983	1.2769	5.76338	1.65445	1.22043	3.06197	0.183127	0.0965679	0.107885	0.647592	0.2812
QSOX1	70.9564	57.156	50.4682	41.8994	29.4119	25.989	26.183	36.2002	25.5967	20.714	51.1162	28.2163	38.4987
IER5	39.6953	44.4893	0.526089	26.6161	23.4785	17.2998	18.2553	17.3817	20.115	20.5856	21.0739	14.6665	16.8236
PRG4	0.607668	1.23828	5.71234	2.35887	2.45119	3.44401	2.05542	1.58295	2.17374	1.29679	2.25076	2.32939	4.11334
TRAF5	6.13158	10.2159	290.182	24.6544	16.1914	21.3015	13.2765	22.4725	19.6084	7.78114	19.6031	14.8338	24.1282
PKP1	179.387	326.723	51.8084	263.872	95.0915	142.859	84.8972	199.962	94.6269	40.596	221.171	79.4033	206.81
TNNT2	53.5069	48.7219	9.02283	18.2828	15.7022	12.6017	11.7839	18.0265	11.2496	17.004	15.6545	10.9253	14.296
PLCB1	14.2967	19.2319	3.75831	41.8503	48.5664	55.1832	34.769	68.6878	89.739	4.25178	82.836	77.9525	110.281
PLCB4	3.83737	7.95027	4.74784	9.44189	19.3044	11.802	8.12883	20.8872	16.7133	2.52982	30.8144	16.1614	34.9903
SNAP25	2.26575	2.75776	13.4784	11.4547	12.6739	8.95731	6.41969	12.9297	24.9822	2.32076	9.40504	23.6718	21.9081
NDUFAF5	23.0701	29.8356	22.6673	64.3454	41.7514	73.8092	49.5663	57.5883	45.7362	35.142	52.5817	49.9177	85.5164
MACROD2	46.6337	64.7151	15.5351	239.394	258.314	293.081	204.492	217.632	190.065	13.6533	282.701	207.756	240.448
SNRPB2	35.807	38.8047	1.1643	112.274	82.4215	145.975	101.738	110.181	118.986	39.9372	156.961	143.299	168.572
PRKCQ	0.513025	1.13254	86.1556	2.87659	3.03157	2.86169	1.95875	2.55832	2.8918	1.27077	3.8174	4.00393	4.4679
LOC101114294	81.7358	93.845	0.228572	55.7907	65.5962	23.7294	48.7997	50.7411	62.2752	27.2208	50.2158	43.989	31.5934
ITIH2	0.101545	0.295902	10.7923	1.35993	1.13296	1.29829	0.674207	0.397737	0.829958	0.256559	0.876736	0.954228	2.08012
CELF2	9.64878	23.3514	33.9328	43.1635	41.1633	55.3291	30.2459	102.799	96.6302	8.4427	136.529	69.2956	149.268
ECHDC3	23.7036	32.7031	0.166494	14.776	13.7657	14.2976	14.0384	16.8867	15.9359	11.155	20.3194	16.0604	16.5404
MALRD1	0.204147	0.282158	0.420216	1.53756	1.64392	1.47143	1.2019	0.749638	1.00063	0.613405	0.69266	2.33796	1.35726
C13H10orf113	0.910535	2.2398	7.07651	9.16776	5.95031	11.4454	6.64777	7.08511	5.78168	1.9171	7.3432	7.57791	9.91398
PRTFDC1	7.50828	10.4935	4.4077	17.8814	28.4578	19.5606	15.3374	26.8275	30.8472	6.6461	27.0874	25.3895	40.2193
FZD8	1.59608	4.84476	4.12615	1.74255	1.40979	0.360284	0.871476	0.325604	0.562295	0	1.21463	0.0946876	0.671556
FRMD4A	3.82926	9.37558	0.170526	16.921	12.8735	19.1053	10.8866	19.6314	19.0537	3.15297	16.3684	15.322	21.4484
CUBN	0.0709088	0.209518	15.3684	0.293784	0.535545	0.425522	0.366918	0.433968	0.453502	0.125652	0.815092	0.675657	1.87273
CACNB2	27.2738	29.5749	9.477	66.2566	54.3511	77.2315	45.6617	96.1998	86.0905	21.6756	110.68	67.2085	122.99
ZNF438	14.1733	14.2779	0.15278	51.2011	34.5962	58.252	34.9562	76.4747	68.0168	5.08701	92.4997	81.2694	115.695
PCSK2	0.0814484	0.215764	2.04003	0.652101	0.567963	0.838377	0.675971	1.12156	0.83213	0.801952	0.709986	1.62353	1.11622
RALGAPA2	2.38762	5.02525	2.7991	9.08945	6.11588	9.10873	6.03374	17.9404	12.8243	0.757077	21.1398	14.4702	17.5193
ADRA1D	2.13175	3.95303	14.0575	17.3157	9.13322	12.4497	7.39346	14.325	8.29116	3.42168	15.5385	9.07522	17.8978
RNF24	17.2295	30.1965	22.0782	94.4358	74.1392	109.563	80.6294	115.219	89.0504	6.59685	108.238	130.735	154.132
LOC101122805	16.9131	19.1131	11.8685	9.32354	8.71721	6.39836	7.0505	7.09835	7.63879	5.47961	11.5396	5.90707	9.93857
ZNF512B	5.96267	17.736	23.0127	6.66754	2.57821	2.95087	1.87455	2.55066	1.39558	0.444622	2.91186	1.29255	2.05368
DNAJC5	16.9884	22.7159	1.45411	10.9682	8.18125	6.09557	8.40011	9.64292	9.45072	9.55442	9.52538	6.55755	9.22299
ABHD16B	1.10653	2.11153	12.7911	0.464119	0.397577	0.955085	0.360459	0.160693	0.29072	0.0836204	0.24912	0.293734	0.432885
SRMS	13.1738	24.6187	27.4605	14.6579	4.08532	8.71096	3.929	7.7458	2.29951	2.01113	6.47613	2.49336	5.39698
LAMA5	22.9774	36.1814	16.7389	24.3932	10.9535	16.2077	7.29065	14.2723	8.46142	11.7696	16.9898	6.52415	12.4859
LSM14B	12.0741	22.4915	0.435533	16.3912	7.29066	8.3541	6.91356	10.1293	5.8946	2.62112	11.4504	4.668	11.2531
TUBB1	0.379941	0.587124	4384.13	2.67321	1.2364	2.34995	0.940449	1.027	1.13775	0.905827	2.26053	0.811443	1.7128
LOC101106046	2238.69	3688.27	0.32166	914.326	1591.54	1683.6	1639.75	981.238	940.209	863.803	1064.34	842.549	608.555
LOC101121190	0.257219	0.255524	1158.93	2.52741	1.43493	1.81155	2.07858	0.944522	1.90297	0.477851	2.77603	1.83115	1.48424
LOC101106558	844.81	809.441	0.561454	281.761	371.99	179.058	201.94	143.449	159.134	259.269	128.278	100.686	159.23
LOC101116754	0.545182	1.65662	21.1752	3.26784	1.61014	3.64851	1.82107	5.73104	2.62115	1.33454	3.14161	2.23738	4.34873
CDK5RAP1	27.3606	44.0544	0.306463	130.72	65.7859	139.693	77.5864	128.3	67.3613	40.9005	115.479	102.476	149.094
GRIK1	0.1838	0.730355	60.2952	2.31882	2.0507	2.8766	2.53346	1.12487	1.98574	0.910551	2.06843	1.83187	1.5025
ACSS2	63.9028	51.2817	47.0104	30.4473	28.0038	26.9828	28.3416	36.4023	27.3255	21.0637	35.1627	25.9337	41.0167
FAM83C	36.3547	44.4376	81.227	25.8481	15.9817	19.3288	25.2438	14.4626	11.7671	14.8382	11.1519	7.14284	7.8084
MAFB	52.7994	87.5471	39.0307	39.1403	33.4513	24.9228	25.726	26.8022	25.1995	32.4066	29.0491	20.2165	28.6658
LPIN3	24.4186	26.5264	1.15446	17.9009	8.77659	10.8708	7.28137	15.7926	7.48175	6.5707	15.913	7.14245	14.5015
PTPRT	0.824708	1.87495	80.1387	3.76283	6.04276	5.38815	3.7637	6.569	6.85162	1.62815	12.6714	4.8371	10.1747
FITM2	80.8587	38.6766	20.1752	30.9525	32.0184	15.9976	27.1598	30.396	15.1406	10.83	44.9727	24.3282	36.0486
CYYR1	16.7418	28.6227	3.83128	43.9642	50.113	63.7294	43.7811	76.1688	130.382	10.783	71.7598	74.5039	125.917
LOC106990174	4.28922	4.3227	1.53937	2.92799	2.24417	2.42474	1.83866	2.10329	2.85323	0.871074	1.96843	2.25694	3.53575
ZSWIM1	1.24935	1.94685	60.56	0.962824	0.922454	0.457863	0.593879	0.922033	0.569598	0.42324	0.793151	0.627822	0.768625
CEBPB	57.9582	46.7079	10.3407	26.7068	29.5746	19.1041	23.7815	13.1968	21.3209	3.98377	30.66	16.5382	23.6307
TSHZ2	14.0076	19.1211	8.46554	53.2537	40.4498	57.6976	32.917	93.4223	62.2927	7.71427	112.121	69.1942	90.2422
PFDN4	14.2821	18.3159	3.62455	43.8641	23.6721	38.4635	28.4161	45.725	31.5855	28.2198	31.1843	25.6244	34.299
LDHD	7.36106	4.96644	0.382279	2.66212	3.64448	3.24016	2.30101	3.23799	1.49114	1.29059	1.81423	1.99789	2.33949
NCAM2	0.290409	0.819934	10.5491	2.20273	2.84794	2.6001	2.81748	4.25624	4.1032	0.766674	4.50467	5.36444	3.71534
MON1B	3.62682	9.75011	32.5946	3.83255	2.75764	3.02732	3.12152	1.47976	1.96864	0.339384	4.59449	2.71582	3.17796
WWOX	59.5406	81.015	0	229.35	298.893	379.859	219.157	317.099	265.794	33.8798	381.13	358.067	460.155
TMPRSS15	0.0168782	0	0.203324	0.491391	0.64027	0.0548633	0.176942	0.0826371	0.190278	0.0752538	0.19617	0.264345	0.316528
SLC38A8	0.32518	0.397584	31.9942	1.11058	0.809349	0.962148	0.590019	2.15853	0.740236	0.176585	1.68207	1.05064	1.5336
MBTPS1	20.2811	31.1055	87.2275	18.3748	13.7682	13.9524	11.2085	17.0531	12.7966	8.029	17.5019	9.65676	17.4212
SLC7A5	43.4273	114.35	83.8965	52.2911	22.5808	34.8757	27.5	28.1547	14.6284	6.77053	27.6519	16.8004	26.4488
TCF25	92.6002	70.6913	4.67829	40.3137	42.5625	29.47	33.4228	43.5957	41.2487	33.8947	55.1788	40.5013	49.105
MYLK3	6.06622	8.0866	103.325	18.304	16.8989	22.3504	16.8406	17.3148	17.9756	5.00013	22.4307	16.7934	25.7472
GPT2	67.009	94.9002	192.342	68.1056	35.95	58.3654	42.3587	49.9616	33.1612	17.6936	46.6196	32.0081	47.1064
ADGRG1	162.538	206.74	4.51653	145.415	92.6313	109.231	75.2126	113.398	77.4823	54.2505	113.707	60.4509	123.999
ZNF319	2.21627	3.11675	11.9875	1.51353	1.92324	1.00797	1.24297	0.535852	1.38807	0.365982	1.36291	0.857058	1.10519
MMP15	9.40157	9.63125	0.161497	5.81422	6.21604	2.59661	1.98624	3.43476	3.11732	0.913248	4.76128	2.01227	2.71842
LOC101103916	0.645716	0.855279	0.408924	3.63452	3.36206	3.59148	1.95558	2.79263	2.18385	1.47149	5.5751	3.18716	6.2721
CCDC79	1.16786	1.6397	10.7925	2.75407	2.2933	4.60602	2.3262	4.51716	3.3244	0.833129	6.08876	4.48958	6.50309
B3GNT9	5.1265	9.6559	22.9733	4.48441	5.1163	2.21675	2.60909	3.05111	4.24175	1.27567	4.68547	2.00894	4.24049
DHX38	21.2569	26.4093	15.0259	10.9614	8.82638	8.22232	7.61501	12.4266	10.1364	7.95791	12.0648	6.04895	10.123
ATXN1L	8.03136	13.3963	0.0897827	8.73979	6.27781	6.82882	4.95675	7.91637	6.27902	2.80888	9.92958	5.59447	9.18259
HYDIN	0.0797731	0.0792473	0.519677	0.2787	0.200261	0.250662	0.174228	0.244109	0.185486	0.136343	0.225172	0.198767	0.44881
ZNF536	0.175816	0.772727	0.409006	1.11681	2.05079	1.21227	1.3335	1.66293	2.0046	0.587925	1.65865	2.04814	3.41248
CADM2	0.299231	0.580691	80.7165	2.16781	5.24082	2.95568	2.38312	3.95224	3.47146	0.842899	5.32656	6.25198	6.00317
CEBPA	78.1624	63.0079	961.099	36.039	33.0811	19.2883	32.4942	17.8934	16.1979	8.7168	40.03	30.8854	23.2145
SBSN	1326.02	816.876	14.5495	445.239	494.913	338.062	583.749	424.859	229.437	276.928	455.819	350.551	244.345
APLP1	12.5554	11.8629	3.15952	6.86396	3.67331	4.53464	4.33871	6.65949	4.44291	3.69053	9.03361	4.80678	5.59468
ZNF793	3.17495	7.1669	7.98469	11.1638	8.83099	14.4872	9.78607	11.5491	11.6894	4.17035	12.7707	11.365	13.9662
LOC101109901	8.5134	8.88209	0.0271983	34.1229	19.8105	34.1491	21.2426	21.305	19.5979	8.34125	23.1396	18.4727	27.0862
LOC105616630	0	0.0576163	21.5339	0.284945	0.169865	0.730539	0.494019	0.186352	0.183895	0.161621	0.541686	0.278703	0.596134
PAK4	22.615	29.4173	95.6582	22.8229	10.7038	12.6364	8.43432	14.3247	10.804	7.26471	15.626	7.94154	12.8741
NCCRP1	81.82	62.7241	26.8245	18.9126	22.5572	12.7539	18.7589	35.7082	18.4997	34.4336	27.8802	20.1887	19.9167
DYRK1B	14.5702	24.338	13.1155	12.608	10.5214	8.11272	7.00082	10.106	8.21287	4.27071	13.5072	7.66415	11.4435
CDCA8	12.5311	16.2372	162.395	9.91384	7.53774	5.87379	7.85358	5.53513	4.18436	5.52643	4.16129	2.24963	2.94737
LTBP4	116.487	143.236	132.254	46.014	36.6345	31.6222	16.8138	32.5696	45.7543	36.0363	56.6569	12.8923	33.1204
CYP2A6	111.929	100.199	127.74	26.2902	34.2771	14.6242	16.2551	25.5676	39.0814	3.6298	19.102	6.68024	8.39091
HNRNPUL1	75.9732	133.504	0	72.0253	58.3206	44.877	48.9247	45.373	45.7708	10.882	64.2648	34.0023	58.7995
CXCL17	0	0.128225	5.26648	0.563686	0.468044	1.04892	0.281908	2.05389	0.40926	0	1.12516	1.24051	1.34998
MEGF8	3.6259	8.22247	18.6861	3.48114	2.18804	2.80512	1.53452	2.84077	1.6303	1.72988	3.88865	1.39611	3.03257
CIC	15.2053	25.9654	21.3538	11.9739	6.89146	7.8472	4.68794	8.6719	7.32922	3.71431	9.98147	4.73379	9.61411
ERF	25.3359	26.8615	66.1136	12.9408	10.8897	9.47163	8.81796	6.50608	9.96974	4.98205	14.7297	5.40573	12.5037
GSK3A	60.9452	71.8293	376.019	43.0668	32.4146	29.0745	24.4245	39.2907	29.017	26.3158	41.9015	20.9774	37.1307
LYPD3	316.545	341.665	178.556	145.635	135.527	74.1578	111.176	119.929	95.9286	52.9697	159.745	43.8937	64.8472
LYPD5	169.63	193.925	135.164	37.4229	59.3879	27.6265	57.1046	32.086	16.3321	5.23003	49.0528	28.3224	19.1509
BCAM	120.718	130.731	87.2847	44.0734	40.1978	28.5228	31.5676	23.5399	30.7311	24.9111	29.8812	15.4244	29.5759
CLPTM1	66.9993	82.2945	63.9049	30.0485	27.8778	17.7537	19.9436	29.4416	30.9376	29.6385	43.9072	19.0124	29.063
LOC106991561	43.6544	60.9906	4.04424	30.8636	13.4049	15.7863	11.6359	18.5654	11.5681	4.16102	23.9203	9.13367	15.4497
FOSB	0.576361	0.975476	16.6269	0.419502	0.214353	1.24899	0.307706	1.99885	12.8599	0.713827	33.7601	53.4774	13.8113
IRF2BP1	15.8235	18.6015	29.0841	6.07421	6.37436	3.8892	4.44239	3.91758	5.88018	7.02398	5.86052	3.0664	3.81884
CCDC8	29.4521	29.2107	16.8813	16.1207	15.785	11.793	11.6677	10.5493	9.19822	8.45299	13.784	6.54161	6.01082
FUT1	17.0861	23.3224	48.9684	11.6292	7.4944	9.71579	8.26099	7.62313	4.82472	1.91421	4.33122	2.69272	3.62197
AP2A1	37.0273	59.5704	11.3278	30.5448	20.1667	17.0311	14.3889	23.198	19.5714	7.41437	30.7189	15.5982	30.7399
PNKP	12.8525	16.8667	91.5174	8.87139	5.63541	6.44905	5.4898	8.15611	5.98153	3.75334	11.1031	4.92938	7.42319
MYH14	108.843	98.5161	77.9049	53.7655	30.3896	41.0234	25.5315	36.0993	24.9062	20.7172	42.7829	18.2483	30.8322
EMC10	60.4757	67.2328	1507.46	22.5426	29.8694	14.5857	28.5606	16.1055	23.8194	6.31789	32.5186	21.9768	23.5807
KLK10	1284.47	1459.27	13.2933	425.141	457.053	353.347	336.655	205.92	174.868	111.594	228.509	144.714	117.595
IGLON5	11.159	10.6476	7.44245	4.77313	6.4907	5.32915	5.03605	2.20094	2.01222	0.392999	2.45871	2.40959	2.1362
VSIG10L	6.39494	13.7952	24.7246	7.39311	3.32009	5.30137	4.54938	5.32342	3.02406	1.95613	5.43967	3.4017	3.63232
CPOX	16.6793	23.9179	4.03365	12.8087	13.4643	9.45727	11.299	13.0194	10.2832	6.39417	15.3432	10.591	12.362
LOC105601988	3.69358	4.59074	0.114768	12.3738	9.42754	11.7183	9.45933	11.6277	10.2317	2.50972	10.5643	12.499	18.8133
LOC105601991	0.17208	0.091171	81.5213	0.584489	0.447985	0.646361	0.300664	0.814431	0.565818	0.0426244	1.04763	0.637021	1.12535
EPN1	88.6989	87.3911	9.58514	45.5712	33.8114	27.905	23.6919	34.4941	33.6423	33.5424	42.51	25.3098	39.5158
FIZ1	9.05692	11.45	45.6167	8.08057	4.67861	5.5863	4.11379	5.11168	4.18973	2.49032	6.3633	4.37999	5.75174
PPP6R1	39.3412	69.668	2.53847	34.1971	19.7963	22.8889	13.8068	25.3879	16.044	13.6372	29.4601	13.4498	26.7666
LOC101113523	2.82781	5.37744	0.391701	12.5713	6.96469	11.315	6.41695	11.8344	9.20998	2.38909	12.9168	8.75417	11.5441
C14H19orf18	0.569506	0.754336	1.67809	2.65288	1.63619	1.72778	1.5921	5.59411	2.76878	1.61875	4.18427	2.5745	4.99098
RNF225	1.21204	1.54807	6.06558	0	0.676152	0.281413	0.302532	0.158953	0.122	0	0.143746	0.123265	0.124891
LOC105602113	4.26937	6.92651	0	3.751	3.21321	1.99817	1.92008	3.03034	3.20399	2.32782	3.39759	1.54667	2.66037
LOC101115227	0	0	17.832	0.692359	0.663329	1.35277	0.207756	0.582169	1.42427	0.132539	0.0987142	1.43903	0.771891
LOC101117272	17.7035	20.3955	4.07643	44.2497	57.1609	48.6642	44.5086	73.3347	57.8369	22.7367	87.3332	99.164	106.385
TRPC6	2.76146	10.973	0.730653	14.7797	25.6212	21.057	11.2461	25.3378	20.7445	2.66921	24.6491	28.6162	44.1795
GUCY1A2	0.411157	0.429944	1274.39	3.52811	5.05819	3.66945	2.36312	1.6952	1.57048	0.763831	3.6649	3.32758	1.77939
C15H11orf65	697.969	1040.61	1.50929	249.254	176.079	255.974	93.5649	190.167	306.34	111.734	249.022	157.479	244.114
ARHGAP20	1.59719	3.26426	284.797	7.99553	8.95043	10.219	6.14325	10.3676	15.8163	1.67559	12.9357	13.5725	19.6003
LOC101112509	283.058	236.354	18.3849	169.929	153.486	126.842	123.987	91.1249	76.3147	4.16304	123.887	105.171	31.9676
ZBTB16	34.7494	41.4376	7.17711	97.494	105.902	127.998	83.8081	280.5	201.35	16.4977	245.542	157.873	578.84
JAML	6.42191	10.3145	37.3653	28.3762	15.9945	23.3675	14.8209	39.8287	20.0946	20.2534	42.8192	21.3469	19.2578
BCL9L	34.4427	44.8526	15.5086	27.4145	19.4444	18.1986	11.1936	22.0733	17.4746	4.09015	28.701	17.0318	24.9921
NLRX1	12.6404	13.5959	20.1925	10.7391	7.90133	8.51071	4.72698	8.75172	6.93607	6.13255	7.32309	6.571	6.78886
RNF26	16.9278	19.9402	552.758	9.12293	7.78861	5.19553	6.89737	7.53452	7.44865	6.77847	7.88762	5.11252	6.33821
TRIM29	572.187	552.466	0.554526	252.397	213.967	148.188	166.438	294.175	159.417	215.14	289.464	189.764	242.992
HHLA2	0.240193	0.636293	1.48003	2.09788	1.48425	2.56248	1.59799	1.01769	1.7705	0.384437	2.08609	2.39392	2.90526
SOX6	1.96215	2.59071	1.58167	4.66981	8.52755	6.06082	6.43767	13.8079	8.53216	0.606378	16.8378	16.1504	12.9757
PDE3B	1.04021	2.5051	7.29339	2.82196	4.37857	4.81569	3.7589	4.64441	7.3959	2.37165	7.34035	4.98172	20.8548
LOC106991619	6.2683	16.0999	0.169331	23.0895	25.7855	28.2892	21.9044	66.4507	48.314	1.98471	69.7773	43.3825	109.533
MORC1	0.0947855	0.125548	26.9621	0.433647	0.54388	1.40847	0.520497	1.29278	1.77459	0.432675	1.39394	1.58091	1.32829
TPP1	16.8459	25.9482	0.168143	14.4021	11.6981	10.0947	8.80311	12.7474	10.2731	6.45262	12.9221	6.11156	13.704
DNHD1	0.272363	0.333358	0.333905	0.732729	0.584684	0.960035	0.575275	0.966371	0.665598	0.425284	1.07046	0.692134	1.52189
LOC101119417	0.433893	0.729441	6.11722	1.97987	1.35922	2.09749	0.758114	1.94053	1.77553	0.992086	2.64619	1.29496	3.77964
PVRL3	3.67897	7.07322	0.0553245	21.7333	16.5553	15.1719	16.3817	17.1518	30.2877	5.81608	13.0123	19.8353	26.9772
LOC101118897	0.103229	0.0781321	0.0183805	0.558144	0.361978	0.335548	0.476679	0.216607	0.353283	0.416425	0.563169	0.167975	0.61694
SLC9C1	0.0440947	0.0973423	49.8992	0.38513	0.327984	0.47777	0.102725	0.1979	0.39354	0.0873785	0.341665	0.439476	0.530086
NUMA1	47.0822	56.0966	27.296	33.6315	23.6887	26.5563	16.2664	34.4796	20.8649	18.7564	39.8139	18.4561	31.0114
INPPL1	24.3229	38.2643	4.17244	24.9683	13.6147	17.203	10.4927	17.8899	12.8486	8.13046	18.7585	9.23367	16.733
ANO3	3.04973	4.20412	2.00583	11.1891	10.56	13.777	8.43555	12.5913	13.5396	3.50952	18.2865	11.3796	14.4949
MPPED2	1.89188	3.40473	22.507	8.41166	9.49868	10.7841	6.86264	18.7521	19.5605	2.29217	17.2768	15.3715	23.7618
DNAJC24	36.0277	46.6272	0.814243	109.557	85.2106	125.57	88.5167	100.009	75.7748	50.1952	103.67	94.277	126.796
LOC105602333	1.32828	1.86286	31.788	3.22262	2.964	3.95077	4.30035	6.72652	6.67978	1.70315	6.44339	4.93199	7.96522
TP53I11	23.258	35.7049	1.32391	21.1176	14.9072	12.2192	11.3993	17.2148	17.5803	11.7285	17.9464	6.67488	13.338
LOC105602425	0.679966	2.10911	11.8102	0.839468	0.62421	0.755402	0.300775	0.547837	0.303229	0.0191881	0.757432	0.269608	0.347664
CHST1	7.27259	10.1348	10.0223	3.0975	2.60175	1.80022	1.29871	1.64121	2.21811	0.963892	1.74232	2.13735	2.75424
SLC35C1	8.53069	12.439	7.74223	5.51118	3.37378	3.56938	3.15714	3.52069	4.53833	3.39795	6.36777	3.32528	2.87264
MAPK8IP1	8.22909	8.23464	56.6398	5.59522	3.51138	3.21434	3.31284	3.41014	3.48982	2.262	5.82516	2.86488	3.94465
ARFGAP2	55.9462	68.862	0.259568	45.3284	24.452	28.6271	26.9906	31.2217	20.632	17.1	29.6668	18.2022	24.8972
LOC106991627	0.553511	1.64959	4.27017	2.88724	2.03282	3.42349	1.34993	2.85118	2.01501	1.07971	5.09301	2.39711	2.72817
LSAMP	5.33545	11.9669	57.0761	38.4715	77.7052	65.8651	36.8231	75.5819	63.959	4.01766	100.342	67.8128	84.1009
ZDHHC5	50.4831	59.9243	38.0644	39.1612	23.0807	26.8943	19.2958	25.7617	20.6373	21.2895	28.7893	13.8629	29.169
LOC101107153	81.4233	60.0728	4.04329	151.095	125.656	186.34	215.127	147.726	163.64	144.988	165.265	202.825	152.369
MAATS1	3.83786	4.97897	9.80595	14.9235	12.6407	16.2062	11.2297	25.0968	16.299	2.18778	43.3405	26.199	29.8058
RANBP17	11.2335	19.8391	112.307	44.5688	47.6274	65.536	50.8202	52.9242	58.1372	4.82856	63.5263	65.4828	87.0957
MSX2	78.0093	112.891	0.0451518	67.8735	39.701	49.5996	44.6915	27.5537	35.0473	16.6928	25.1528	15.0512	24.3043
HGD	0.0722123	0.0478242	0.718047	0.420475	1.08768	0.547699	0.662403	0.97228	0.712327	0.348798	1.3189	0.308449	1.30216
ADAMTS6	1.04206	2.54924	1.30826	6.40819	6.9759	7.51184	5.75013	5.8829	7.26738	1.22475	6.95616	9.67424	7.85375
FAM159B	2.61542	3.34877	35.6102	13.7061	13.8123	14.8304	7.84475	6.29593	16.4625	2.00831	28.3716	18.9916	17.1041
RNF180	34.5273	49.7699	25.5903	174.91	125.646	212.267	112.142	158.891	174.621	32.9479	87.2855	111.465	123.559
NDUFAF2	41.0984	41.1678	17.519	104.073	107.28	122.923	110.331	125.658	106.903	22.3963	115.011	126.785	156.002
LOC101108953	34.3344	56.5661	115.463	154.816	193.359	252.719	146.68	237.239	208.289	7.59121	232.467	191.528	335.828
NDUFS4	161.625	175.069	3.98825	297.745	405.514	431.982	461.086	346.676	361.312	308.821	304.961	507.325	413.664
FGF10	3.25711	5.66237	35.3571	14.2899	21.5771	20.0228	14.1088	23.8652	22.2164	2.53803	19.6417	25.4418	41.929
GHR	30.6206	63.0579	0.0782328	124.165	112	133.256	125.528	150.399	154.924	18.9758	163.659	149.37	283.657
LOC105602672	0	0.0828633	27.8679	0.637475	0.767795	1.83017	1.09307	1.22519	0.528953	0.185954	2.49295	1.60331	1.62446
WDR70	31.2394	45.2164	5.76024	112.759	83.8385	132.284	92.5829	104.71	91.0667	33.8952	97.0024	98.8602	116.719
SLC1A3	4.70025	16.1453	0.133374	23.6737	15.5053	34.8685	22.5705	23.9716	27.5982	9.88456	22.294	19.1621	33.5183
CASR	0.0193916	0.282535	4.6714	0.790389	0.562527	0.819428	0.499755	0.640862	0.573856	0.324224	0.482961	0.938734	0.699351
FBXL7	5.12738	11.894	3.78714	31.0189	39.0634	34.501	18.1607	56.2972	75.7599	3.2163	61.7856	32.7431	50.1058
CTNND2	5.87442	7.97425	13.4757	20.9269	18.9435	19.0686	17.1598	28.9253	14.6882	3.06385	43.3973	30.9798	23.3878
LPCAT1	8.43199	19.2323	1.38723	11.9426	4.7947	6.34945	4.92037	6.61495	5.04654	1.71767	6.91908	2.96661	5.68274
TLL1	0.993559	2.38927	0.128664	6.81033	4.91847	8.76903	4.51693	13.8025	17.8753	1.42646	21.0936	11.1935	17.9371
LOC105602713	0.154331	0.204419	0	1.6475	0.516574	1.17054	2.0224	1.51123	4.05968	0.305825	1.53749	1.31843	2.00373
LOC106991695	0.361201	0.239214	0.904759	1.75266	1.14184	2.21774	1.15702	4.64222	4.58102	0.581555	1.49933	1.79998	4.25535
TTC29	1.55036	1.74549	17.6856	5.19075	4.78571	6.9713	5.01137	6.95812	8.88468	0.729651	9.61031	6.29112	9.80345
INPP4B	16.0796	23.2856	2.24047	56.0073	59.2684	76.9815	49.4889	77.8635	82.353	6.00771	95.8983	91.5452	81.5261
RNF150	1.69697	3.385	0.0273224	4.911	7.49797	6.18266	4.8137	7.71265	9.27008	1.68304	12.1797	8.43247	13.6446
GRIA2	0.0218487	0.0217047	1.81782	0.095415	0.08532	0.260406	0.119296	0.187203	0.230918	0.231361	0.108832	0.13221	0.212751
PXMP2	1.55747	3.64453	0.158537	5.13899	5.03936	6.24389	4.53545	8.57868	6.73066	1.58173	11.8956	5.39601	13.4058
TMEM132D	0.126776	0.139934	38.4354	0.41523	1.11979	0.835625	0.876801	2.19833	1.59298	0.573097	1.80676	1.47412	2.51467
LOC101102014	34.7606	33.0557	41.0557	16.7832	20.3059	13.271	15.4475	15.6958	19.3263	11.0032	23.2964	10.0704	10.9498
TNK2	33.2509	58.2361	5.76739	41.9799	14.945	26.9781	15.075	27.744	15.1378	4.1767	31.9655	16.2671	25.8781
FAM109A	3.62576	4.72564	3.74868	2.49121	2.07122	1.13142	1.14031	2.13024	1.59413	1.09928	1.87828	1.81715	2.0085
LOC101105533	5.29119	7.3815	214.759	14.7604	11.2908	18.0057	9.47346	15.2925	13.3533	3.04985	22.1806	18.4474	23.8568
HSPB8	185.871	232.461	0.267563	78.7527	82.0975	60.2925	67.8556	79.6995	79.0506	50.9223	88.2757	45.0245	81.6671
KSR2	0.10698	0.303642	41.7527	1.40157	0.528595	0.678923	0.854487	1.04756	1.03375	0.408843	0.938887	0.522235	1.94012
HEYL	35.0911	48.5125	23.7162	23.2933	18.8974	19.1223	14.2735	17.2725	16.9581	18.622	13.6417	10.0992	20.7078
RPL6	43.6311	30.5138	50.644	67.2395	71.3328	97.3859	76.742	119.628	201.751	56.1557	79.9784	172.451	82.6632
RAB35	34.4448	55.4863	160.014	28.7745	19.3649	18.5736	17.8303	15.7366	13.9654	5.93128	25.3492	9.53395	23.8015
RNF10	115.346	158.926	34.7461	98.9191	69.8393	66.6901	59.879	74.5119	64.1465	44.0387	95.1447	39.6932	81.6904
UNC119B	25.9682	31.5787	5.39018	18.1698	13.9923	10.8994	11.4077	14.356	10.283	10.5596	15.4025	7.12975	14.7672
PLA2G3	3.32935	4.528	8.36173	1.68762	1.29349	1.12731	1.68802	2.03759	1.34049	0.728963	1.87557	1.10044	1.32937
ZNF70	3.17094	7.3501	2067.03	3.56228	1.42285	1.34442	0.903324	0.717195	1.26283	0.768372	1.77407	1.07963	1.44192
LOC106991688	1447.02	2136.19	6.02032	317.305	259.327	316.945	210.844	915.992	306.857	209.963	221.696	223.146	243.426
CABIN1	4.19484	9.77007	37.3542	5.39604	2.25115	3.82322	1.73806	4.53725	2.10269	1.33893	3.77078	1.52322	3.27616
SUSD2	60.1329	33.0314	18.6951	15.8429	15.1131	11.453	11.4232	24.7742	7.50293	4.48014	25.0259	15.2729	9.93975
GGT1	34.0449	41.0731	23.7145	6.69971	5.97267	5.94169	4.59108	9.58885	16.4673	7.00996	16.4217	6.55296	6.87483
GUCD1	24.3404	31.2539	23.3821	17.8817	14.0516	11.0467	13.2066	7.79633	9.61693	5.37861	15.6919	9.6872	10.5608
BCR	19.6971	27.8313	6.21628	14.5853	6.60176	6.06922	5.88141	7.3391	7.52292	8.44216	10.0428	5.95344	14.3022
TOP3B	7.80619	16.9239	41.231	7.12893	2.60876	4.50832	2.34827	4.73239	3.47655	3.0509	5.93038	2.09707	3.7714
FAM43A	30.6617	32.82	31.3646	16.8656	17.1162	12.9234	14.5423	17.2045	27.4473	7.49049	22.1044	15.4384	22.1016
PI4KA	24.0212	44.4521	100.584	18.1975	9.571	10.4216	6.61146	11.2881	9.15707	13.6471	17.9767	5.86713	13.0179
CRKL	58.6464	97.1604	9.51462	62.2739	28.5973	34.0532	29.5892	24.8743	24.1655	9.61399	58.9724	16.9435	35.8306
LOC101119851	11.0564	13.914	18.0631	7.52873	4.97541	4.48307	3.93593	4.8112	4.1462	3.58706	6.45007	3.40372	5.86928
DGCR14	18.3632	17.8882	0.0654957	6.4117	5.96219	4.10567	4.64013	3.76596	4.1075	5.55939	5.37741	3.55064	4.06468
GABRG3	0.543384	0.268818	173.479	2.25864	3.25047	3.75957	2.24773	7.5326	5.69226	0.768663	17.4249	2.89895	7.20602
LRRC15	108.729	141.873	3.84816	44.4363	40.5703	31.7146	40.0142	45.1969	38.0035	45.5407	28.2225	24.2344	30.3839
CPN2	2.90999	4.962	26.5134	1.36333	1.49276	1.63086	1.2565	0.859763	1.27264	1.21792	1.22181	0.52386	1.25455
LRRC28	26.2807	30.2339	0.0568187	67.5725	80.1251	92.6892	74.5792	82.119	79.6453	17.5106	100.706	102.292	106.069
AGBL1	0.0272614	0.0962907	6.06695	0.238106	0.24333	0.177228	0.539832	0.533896	0.742722	0.330882	1.20705	0.957437	2.46449
AEN	3.62809	6.73338	8.17848	4.63656	1.69449	1.71413	1.95333	1.96223	1.66459	0.674012	1.40093	0.870959	2.64734
FGF12	9.10931	12.8391	10.3639	23.2906	59.287	23.4097	25.0985	22.157	38.1812	8.33129	24.8204	33.2561	29.9884
MAN2A2	7.09078	14.7955	75.1072	8.76713	3.53211	5.64716	3.28282	4.53652	3.7539	1.86478	5.3632	2.21706	5.94065
FURIN	49.7805	66.9145	26.0799	31.0033	18.028	16.8921	13.2973	17.9008	10.7647	2.8488	25.4612	9.1377	19.4177
NSMCE3	24.7157	26.2002	12.588	13.3254	16.6521	8.0641	11.5436	8.81755	19.0691	8.99094	13.2827	10.8801	10.9662
C18H15orf39	11.6184	13.6238	18.5993	5.68325	4.72333	3.3128	2.04097	4.08785	4.77257	2.35358	7.1072	3.3933	4.72733
LPP	27.5861	55.4381	75.5983	125.219	138.805	170.421	117.29	141.912	148.282	12.7138	162.249	155.187	201.844
SCAMP2	57.5041	80.4634	7.80112	41.7111	27.9118	25.9077	27.5443	38.7123	29.5395	23.3745	43.9447	27.7814	36.7978
SEMA7A	4.80075	10.3465	0.195092	6.39617	2.29989	3.23267	1.94299	3.0543	2.79016	1.00776	4.09812	2.626	3.7562
LOC101112678	0.390019	0.206639	8.52029	8.51621	2.17577	12.4241	1.97622	4.96485	4.72666	0.521684	8.67757	4.1093	10.9151
STXBP6	9.23059	11.9941	1.8364	18.8518	26.816	26.2996	21.6426	33.0214	34.9107	10.396	36.6001	28.4785	47.1206
NOVA1	1.87083	4.53856	5.72458	6.84254	10.8182	9.2344	7.97278	10.4155	14.2401	2.64591	18.0143	17.5288	29.6291
PRKD1	5.65882	11.8136	4.77485	17.5078	33.9431	28.8999	22.3866	41.0834	63.3665	7.80766	45.1559	43.2195	85.8246
MYCL	3.81827	5.68965	1.92433	2.26363	2.14725	2.16866	2.32692	1.01764	1.88758	2.05938	1.45713	1.05222	1.13273
NPAS3	3.83634	5.91651	8.94597	10.1579	16.3581	16.3026	11.3988	17.9459	22.6787	1.07997	21.0256	15.4889	28.6578
MAP1A	8.74022	11.1271	90.6608	5.01083	4.96402	3.74238	2.10708	4.42115	5.00751	3.48889	4.97669	2.00043	5.0755
CKMT1A	85.5073	47.5499	1.25422	36.8563	29.9482	16.1922	24.1689	47.2165	17.0563	8.13763	50.173	29.2494	18.4701
FRMD5	2.02724	3.19394	83.9532	7.89015	11.714	12.6012	8.1654	13.3472	9.83332	1.50645	10.9129	18.0172	17.7623
OTUB2	33.3098	65.1585	60.1039	26.7719	23.3893	17.4187	13.2018	19.5201	19.5734	14.24	23.3827	11.9025	20.13
DDX24	75.1182	72.2141	444.217	41.8284	41.6175	28.2654	28.7696	36.5677	43.9197	27.4145	43.1713	24.2715	44.6189
SERPINA1	242.264	249.573	0.577407	111.753	133.639	53.7336	72.33	58.1295	29.0858	7.46065	108.549	60.038	50.3885
CRYGS	1.18318	2.10231	30.1312	3.9068	3.70274	4.12739	3.32785	8.90136	3.782	2.65913	6.51651	3.65686	9.49171
CCDC85C	25.8066	30.3	200.868	15.5174	8.24725	10.0887	10.8987	7.84137	5.22653	7.42023	7.0625	3.95131	9.69055
CAP1	154.593	169.321	4.15975	98.0881	94.6819	59.5355	87.998	99.1362	81.3574	58.7313	102.971	55.3471	84.5809
WDR25	7.63625	11.149	64.7396	24.2953	14.1676	18.8358	17.9919	24.2878	19.9322	13.2836	23.3891	16.5147	30.3356
DYNC1H1	47.3264	67.6397	41.3875	29.0212	14.8826	16.9619	9.6836	20.4236	14.6966	24.8893	26.0651	9.53025	21.5053
CDC42BPB	25.462	51.5132	121.017	30.8309	14.5549	18.8882	11.8337	26.2091	17.9405	5.0329	28.6546	12.1451	30.8891
C1H2orf54	152.618	203.986	20.1891	113.357	24.5186	81.0708	44.9571	14.282	27.5584	35.6565	34.4791	24.3277	13.4513
TRMT61A	25.0693	25.6759	5.25746	14.0677	10.2114	6.89851	12.5645	8.141	10.0135	8.61756	10.3826	5.50381	9.34869
KIF26A	5.26941	8.90082	12.4252	6.51591	2.87006	3.30289	1.97998	2.52446	2.8904	2.13891	3.91363	1.51666	2.68098
CEP170B	9.4758	12.3035	6.18732	4.96077	1.98934	2.49278	1.58279	2.21763	1.66156	0.993719	3.72446	1.8221	3.29814
CDCA4	3.70341	5.33701	15.2727	2.80334	2.90892	1.92609	2.04475	1.30552	2.00403	1.01274	1.77093	1.0124	1.36768
LANCL2	17.8498	22.9605	0.696512	51.2618	39.5097	60.6646	36.6814	61.0385	58.3363	14.7393	69.3386	49.8153	89.4906
NEK10	1.13458	1.70772	35.422	3.94881	2.1635	3.97854	2.96455	3.21936	6.99128	0.781792	5.58298	3.40706	7.55869
MAGEF1	33.1881	26.3244	0.542639	18.2573	20.1506	15.931	18.4076	12.1868	13.9218	10.9259	17.1722	12.143	10.4661
LOC106991755	0.390535	0.94835	56.6732	2.52666	3.51005	4.77218	2.95688	9.13553	4.0664	1.74125	6.55642	4.01589	7.66824
EPHB3	52.7494	59.0257	183.072	46.909	25.5821	28.0126	22.5421	34.4641	19.8509	22.6221	32.8231	16.8017	23.595
LOC101119356	147.285	156.435	9.40813	46.8404	61.5133	28.9051	54.8405	43.6589	24.8766	17.9884	36.2558	36.9985	20.2399
CHRD	12.3057	10.3906	18.6999	9.35567	4.45006	5.85768	2.64222	2.98472	1.67818	1.44682	3.26413	2.28768	3.1632
MYD88	9.22972	20.9439	0.661571	7.39481	7.26436	2.94588	4.12539	4.46639	6.65447	0.319007	6.77145	2.34303	5.98644
SCN11A	1.20588	1.11292	24.6979	4.69993	2.33498	4.90603	3.14685	4.89469	2.5435	0.977036	3.84945	2.09356	2.33442
GORASP1	17.3293	31.9108	196.132	17.731	10.5891	11.5739	7.25068	12.5104	11.1001	3.56914	12.6321	5.96321	14.8552
EIF4G1	126.778	205.447	2.08235	73.8986	44.9531	45.6376	32.5058	64.4824	47.4844	50.0795	56.2543	26.8907	64.5707
MYRIP	3.08883	2.77804	190.899	6.84636	5.24743	8.8008	5.3525	10.5022	13.9718	1.35075	19.1216	8.27094	22.4996
PSMD2	154.587	167.908	4.08275	72.0942	70.659	42.4553	60.0946	81.9363	65.4818	77.914	78.247	41.6982	68.3202
ULK4	5.01353	8.20382	24.5357	16.54	11.3604	18.518	10.9723	18.7473	15.8902	3.32869	18.3079	12.1302	19.1622
ZBTB47	18.7438	24.3521	1.69467	11.8594	11.8899	6.15101	6.22978	7.38752	10.1332	4.10013	11.2449	5.72889	9.10897
LOC106990281	1.40033	1.73514	5.7643	0.854834	0.655193	0.440499	0.434094	0.718787	0.381936	0.436377	0.975035	0.578845	0.390987
LOC101119853	2.68782	4.70804	141.985	2.46826	2.46636	0.816528	1.06434	1.3375	1.23896	0.466667	2.4608	0.92991	1.26831
AP2M1	101.123	135.277	2.06704	73.4836	65.4975	36.7691	46.9117	41.776	49.6076	25.9179	49.7069	28.4164	46.9381
SRGAP3	1.99305	4.11749	0.965113	6.98085	8.28002	8.24732	5.17	8.52585	7.93689	2.09267	8.21092	6.69235	7.90909
CNTN4	0.94687	1.82113	0.189125	5.91936	5.95517	5.43891	5.81875	7.00155	8.4172	0.771094	7.58085	6.25139	6.53032
CNTN3	0.169029	0.176752	3.81993	0.582758	0.377179	0.915721	0.823823	1.45915	1.11575	0.370207	1.31463	1.35532	2.56672
FAM19A4	3.86922	10.4297	0.0773005	22.1343	23.4784	37.6575	15.7744	24.0954	26.1145	6.50712	13.7504	16.6237	28.0064
FAM19A1	0.154536	0.143283	0.7149	0.629878	0.637952	1.00465	0.877534	1.4754	0.827529	0.528246	0.744106	0.836109	1.24841
CADPS	0.351802	0.684405	6.69072	1.92043	1.36153	8.5051	5.31123	2.82589	2.26189	0.245087	10.8793	8.79701	1.72869
PTPRG	5.71293	13.0588	109.151	23.7337	26.6871	25.7238	19.3361	36.1947	35.0756	3.79281	35.5683	27.7241	50.4057
FHIT	257.149	262.921	8.12734	1048.89	850.846	909.611	975.458	838.783	932.54	293.777	790.771	1045.21	1206.87
ARHGEF3	8.90037	15.4362	0.929144	31.5268	25.9845	32.3163	24.1446	48.4225	26.548	6.45545	40.4548	37.3308	52.3212
ERC2	2.07765	3.00709	3.57379	7.89154	8.7811	14.2673	10.037	27.2329	28.2699	1.04291	22.7086	22.9405	27.8679
CACNA2D3	7.17433	15.3779	0.341795	57.8082	38.1961	65.8486	35.7593	39.7901	29.4071	5.68522	43.7931	37.1931	32.3586
CACNA1D	0.567666	1.32743	7.7752	1.96895	2.38487	2.17933	1.62246	6.48511	4.73057	1.20301	7.93596	5.1588	7.76445
STAB1	4.18384	15.4859	13.1533	6.14255	3.14866	2.11616	1.3462	3.65166	4.3556	2.9892	4.43285	1.69653	5.29888
SEMA3G	7.43909	17.2272	46.0132	3.83678	3.71026	2.16188	1.35574	2.86434	3.57537	0.512532	3.27198	0.526084	2.16763
BAP1	28.9947	43.7148	24.4937	18.0049	14.112	9.76491	11.267	11.6779	11.7366	5.88881	14.1383	8.36276	14.5253
RBM15B	17.4746	23.8585	33.4545	10.3839	9.27044	6.51999	7.46769	6.14604	7.69358	5.46366	7.51002	4.53918	6.52491
SEMA3F	27.2387	37.0113	19.8848	17.2169	9.98271	8.32144	5.54648	19.2868	11.7787	8.85551	17.555	6.889	14.883
DAG1	15.2442	21.0753	27.1541	11.9676	8.19928	7.61223	6.44922	8.42349	7.88627	7.83486	9.40703	5.23896	9.26505
USP19	20.4981	36.8719	17.0596	21.5363	11.0959	12.6734	8.65023	14.5472	9.68978	8.01412	20.3823	7.81159	16.7899
NBEAL2	13.3434	20.4714	25.7128	11.4719	5.69526	7.69786	3.99	10.0846	5.83665	4.7415	11.313	5.15338	8.14963
KCNMB3	19.2765	31.8093	122.469	61.4996	66.5381	77.6273	75.1147	67.4417	68.2503	15.8166	85.9503	102.751	100.862
TMEM43	56.1774	125.517	5.74906	71.8788	48.3964	43.2905	39.8482	70.3262	41.769	16.2778	72.8553	30.084	74.3916
IQSEC1	2.45378	7.69573	0.268111	2.79187	1.16433	1.52798	1.08415	1.10472	1.11287	0.16767	2.10735	0.64252	1.38336
KCNMB2	0.381153	0.37864	0.336977	4.75083	1.62131	2.52952	2.28925	1.98278	1.57778	1.18605	1.66125	2.20467	2.54303
KHDRBS2	0.307963	0.841316	43.8734	1.59707	1.15966	1.52242	2.57271	2.33239	3.39046	2.68897	2.49276	2.93233	5.33115
TAP2	32.3765	30.3478	18.4785	16.9043	20.9949	11.4429	13.5462	16.2407	13.2428	9.39419	18.0925	9.46168	14.3959
NAALADL2	33.9588	45.5867	12.9264	253.423	275.405	281.951	248.721	244.926	272.329	9.03564	285.019	328.487	372.527
ZBTB22	12.2058	11.5158	2.34587	4.32862	4.64478	3.34465	5.31925	4.85296	4.50962	1.70461	3.76174	4.15316	3.96282
NLGN1	5.62771	5.61015	205.002	38.5395	53.3384	57.3975	48.0825	19.9721	48.2815	2.83182	29.7955	34.0837	47.247
HMGA1	153.863	229.766	25.7932	120.15	84.6854	84.7198	81.6368	74.6975	55.1463	18.3097	96.1342	57.9989	57.3334
SPDEF	42.6625	50.9911	0	9.29108	12.4059	7.42516	4.84226	12.5821	27.1249	3.71945	26.6054	11.9573	9.1105
SPATA16	0	0.0437859	882.846	0.433092	0.516361	0.143272	0.57759	0.566479	1.44411	0.319346	0.548878	0.706008	0.953761
CDKN1A	729.801	740.344	298.756	355.365	309.098	231.34	275.929	331.26	243.842	81.2811	387.683	272.995	350.687
MTCH1	237.941	303.021	67.7116	181.091	145.959	115.869	129.663	136.112	118.077	29.8723	151.149	106.118	128.016
PIM1	34.7048	63.8697	26.0448	29.1698	19.7886	26.0542	18.9213	32.564	19.0456	7.25522	24.7058	13.4155	27.8616
BTBD9	29.8416	48.3498	0.318722	96.8669	76.6477	135.664	77.4842	101.254	94.845	19.1914	120.887	93.7115	122.054
KIF6	0.392107	0.960822	52.9692	1.0845	1.68431	1.27456	2.02106	2.35174	2.18259	1.41318	2.1159	2.62393	3.93125
C20H6orf132	39.2082	59.5437	31.8469	33.7786	20.568	27.3373	19.1296	26.7797	17.7772	7.59529	28.1929	12.5337	31.5351
CUL7	17.3078	32.5924	15.9151	12.052	6.06879	6.13412	4.59835	6.71445	4.8754	3.01087	8.8624	3.29275	6.81915
SRF	10.5803	21.3607	31.0103	10.1479	6.73948	6.35965	5.04472	8.43988	6.10305	2.55488	7.63247	4.9493	7.97401
GTPBP2	20.0613	36.9445	67.4711	21.7262	12.2366	17.6083	10.5928	15.5114	12.6964	7.72758	17.0916	9.71097	17.2791
RPL22L1	82.4298	83.7724	46.1102	154.463	197.873	214.136	260.379	397.834	330.456	114.489	157.436	374.853	251.085
SLC29A1	51.4544	39.39	779.201	24.7263	22.8586	15.8561	15.8209	22.5823	20.9905	12.3116	30.7631	16.4828	15.9839
HSP90AB1	894.74	801.353	0.0997259	418.433	465.049	257.05	414.722	457.651	486.631	273.287	382.489	207.76	274.785
PTCHD4	0.11519	0.129102	32.3674	0.425653	0.612944	0.614448	0.433493	0.477213	0.674274	0.269964	0.706189	0.832658	0.319561
MCM3	26.9907	39.5033	82.7959	15.6913	13.5478	9.5559	11.948	9.07413	11.6777	14.3422	10.7881	6.15722	7.1911
PBX2	61.2062	85.0727	108.454	53.7126	40.7563	33.4316	40.0078	33.4108	30.4222	13.4477	33.0018	22.4676	28.4792
PPT2	102.882	95.4648	102.886	56.6582	46.8986	51.607	31.6199	59.9258	40.8037	32.769	48.5414	29.277	41.2661
LOC101119591	116.315	90.893	128.481	28.8909	34.893	26.7826	47.3921	47.1135	15.6791	17.3851	50.8281	25.4323	19.521
BAG6	117.279	140.097	67.7502	60.5553	49.8915	41.8879	40.4816	55.1919	49.8592	61.9571	62.0891	34.0914	56.7975
PRRC2A	57.8167	81.5641	0.503733	32.8606	19.5579	18.9349	12.3356	17.6593	17.0524	25.4131	22.8584	9.78434	21.6212
LRRC34	0.734547	1.00433	1881.03	2.31101	1.58623	2.61873	2.21495	2.84231	1.33564	1.12691	1.84911	1.95676	3.76004
PSORS1C2	1893.23	1303.91	1025.4	234.769	477.157	167.157	245.699	460.871	483.745	561.169	231.137	266.688	260.104
CDSN	761.496	798.079	154.471	309.021	306.412	147.251	173.865	182.343	151.637	84.0532	199.172	125.067	99.8138
DDR1	143.75	178.005	404.827	103.703	72.565	63.7868	50.6418	63.4656	44.1417	31.4998	65.3593	37.0789	47.599
IER3	431.279	394.295	18.5142	201.835	206.038	166.011	198.657	195.585	139.095	144.968	194.785	145.937	120.799
DHX16	17.3212	23.2084	5.85612	11.5455	9.76457	9.12704	7.58199	12.9217	9.73788	7.62804	14.3496	5.99677	11.8887
TRIM10	5.78752	4.78084	109.022	2.28739	2.30865	2.74771	1.42712	1.40919	2.34587	0.971133	1.49825	0.708843	1.72815
RNF39	80.3843	112.608	12.9736	57.1841	37.5023	40.6876	35.0937	47.0765	31.9335	23.4658	51.9644	21.5098	33.9703
MECOM	11.7665	20.3513	0.543891	36.092	45.26	49.4883	36.1616	70.678	106.205	5.48436	72.8491	62.9929	100.008
LOC101114669	0.678489	1.05999	5.3263	2.25392	3.66857	3.48725	2.9941	4.21629	6.86446	0.853241	6.09492	5.12742	7.00203
ZSCAN16	5.54588	8.75616	9.48695	20.0213	14.2564	19.3731	9.84501	30.0856	20.6947	17.6056	21.5842	15.2872	25.4093
LOC101111401	7.87813	14.4286	4.07395	4.95537	3.03846	5.47993	2.29416	6.5477	4.93414	0.795025	3.2298	1.52329	5.47198
LOC101113108	3.60683	3.85275	2.38371	1.35495	1.29814	1.76492	1.52468	1.85138	0.819795	0.518759	0.772738	0.165659	1.00706
ATXN1	4.54362	7.03053	814.276	20.9069	17.6795	23.3943	14.3589	31.5713	23.9093	1.22271	27.7083	25.6934	32.4183
DSP	472.748	662.764	4.62185	306.732	174.32	178.915	159.077	236.252	107.624	36.875	215.298	101.788	148.363
CAGE1	6.5408	7.3109	0.0285433	21.1311	10.4447	24.1854	12.4692	17.2324	12.1298	7.26364	27.2515	11.3554	27.851
FAT3	0.104343	0.0734223	1.56073	0.730975	0.221921	0.423962	0.532691	0.431046	0.482472	0.208382	0.232803	0.167134	0.475089
GRM5	1.71608	2.41079	4.80969	5.75317	7.87144	12.2833	9.3435	8.93249	7.52357	0.59253	10.0159	15.9683	18.3794
CCDC89	2.62316	4.41355	5.95119	1.65125	2.551	2.03565	1.67228	0.911173	0.82423	1.10635	1.97173	0.933719	1.07388
DLG2	8.48282	16.3574	258.884	36.5082	59.548	48.2636	37.8125	83.2251	40.1203	3.95192	70.7001	66.5215	91.9935
LOC443104	142.719	285.936	13.5791	92.2939	80.4767	28.3687	76.4685	38.9597	50.6413	16.2134	47.0952	27.4106	35.5484
LOC105604169	22.1222	41.5399	2.20525	130.199	70.593	132.878	69.4418	104.902	78.4227	17.0938	103.512	62.1139	149.295
LEKR1	2.81535	3.89297	46.1114	8.26411	8.14628	15.5037	12.122	8.10386	10.2454	1.8622	8.91246	10.9683	12.9875
SLC37A2	34.7703	38.6431	11.1457	31.6835	16.6414	15.9728	17.5648	26.5938	10.5229	8.38802	25.7263	18.9014	14.6135
PKNOX2	19.6082	36.2662	109.514	72.3447	54.733	72.8146	46.874	94.7811	79.8807	11.8687	91.3372	68.9326	77.9677
SRPRA	83.962	107.54	0.201112	49.5556	45.8551	30.9238	32.8959	51.5654	59.4849	36.5179	58.9298	31.0974	48.7459
OPCML	0.223364	0.201182	29.6764	0.364167	2.22297	0.86158	1.24106	0.590546	0.478439	0.278851	0.756572	0.661495	1.28888
ST14	29.0988	37.7319	19.7517	31.0495	13.5801	17.7414	12.3096	17.2468	8.45995	10.4706	19.4472	10.7768	13.6189
CCDC86	14.8629	25.0556	62.1492	9.90226	8.78528	5.50264	6.34977	5.87404	7.74755	7.85937	7.19453	3.44958	8.06556
PRPF19	58.6575	70.9687	177.102	27.7402	26.2108	16.6321	17.3619	21.6108	22.3716	16.4162	21.2231	9.72286	18.5234
TMEM109	172.548	141.33	0.130539	77.5294	101.964	57.5104	60.5927	76.5989	71.9399	63.1213	115.412	58.6829	68.9299
PLCH1	0.112417	0.0744508	76.4923	0.32729	0.331485	0.408917	0.329704	0.57006	0.396044	0.179009	0.533301	0.948928	0.5676
DDB1	60.0161	71.054	0	36.1473	26.1599	23.8404	25.4258	31.4653	24.5956	21.5406	32.587	13.7851	28.0391
LOC101110099	0	0.173577	1.72662	1.33534	1.75454	0.99393	1.37381	94.4774	19.7596	0.486905	15.4487	131.729	41.0229
LOC101110371	2.18612	1.98121	60.5862	5.19221	15.2765	6.48272	7.23728	15.9143	9.56629	0	78.5183	56.5185	87.1409
MTA2	48.4485	76.9001	55.7531	42.9289	31.0811	24.2085	23.1374	34.3006	27.1826	27.3491	32.1851	17.5907	30.3874
GANAB	43.6852	71.3778	113.442	44.8392	27.2611	30.5937	23.2797	34.6789	25.9085	14.7828	35.5345	18.8448	39.1587
HNRNPUL2	86.3411	111.14	2.56178	51.3164	46.2742	33.7099	38.8692	46.8143	47.6994	14.8103	54.7647	20.45	46.7374
ZBTB3	1.40473	2.48083	27.0938	1.70404	0.685689	0.317091	0.639164	0.465674	0.288682	0	0.388731	0.416679	0.548827
TMEM179B	22.5968	24.7179	7.26572	15.0918	10.1508	10.6372	9.50081	11.8612	11.5089	4.40234	17.7057	10.4232	12.331
RPS6KA4	4.75098	10.8222	16.504	6.65167	3.07243	3.77064	2.85515	5.77825	4.13644	1.16933	4.77326	2.11121	4.58369
MAP4K2	15.6117	17.7985	64.1497	10.9382	7.10826	10.2376	7.43737	9.29522	7.41216	6.35003	11.3083	6.48744	8.08366
CDC42BPG	54.4398	73.806	68.7142	38.209	20.868	26.1743	17.0649	28.9126	15.1478	11.158	33.7243	14.3474	20.327
MRPL49	46.9262	58.8726	31.865	34.4808	32.4589	23.949	25.8967	25.7062	29.9347	18.8555	35.4421	20.6863	28.4091
MAP3K11	33.9446	34.8875	82.1751	17.6759	13.5333	9.94493	9.6653	18.0612	14.125	15.8727	16.6644	10.9581	14.1597
OVOL1	45.3697	94.6888	1228.83	49.8836	18.1144	27.5343	21.696	31.7333	19.7139	13.9722	32.924	13.3398	28.883
CFL1	1039.19	1188.11	7.42957	588.289	611.536	294.365	486.515	332.538	526.308	449.319	521.108	305.461	420.536
KLC2	5.77911	10.4805	5.42339	5.97531	2.65147	3.62829	2.76029	4.66073	3.38694	1.22413	3.40776	2.53771	2.99971
TMEM151A	3.29093	2.90599	5.99489	1.96822	0.825436	0.608113	1.3595	1.77988	0.25165	0.36019	1.27074	1.5982	0.478425
RIN1	7.47023	10.2063	13.8616	4.79499	4.0197	3.61684	3.07036	4.12186	3.00475	2.62259	4.83441	2.44966	3.01231
B4GAT1	11.0846	11.9751	138.988	5.89964	5.9518	3.60308	4.72081	5.85109	5.32068	5.27684	5.1188	3.2551	4.74718
CTSF	144.503	112.973	134.641	47.0881	52.8072	29.8853	47.8784	55.6553	61.3612	54.503	52.3001	44.5694	47.6059
LOC101106728	84.3339	113.481	45.3435	53.3403	23.5587	32.5495	20.9197	34.676	11.8634	7.00159	37.8478	12.1368	28.0681
CORO1B	50.099	54.3006	164.236	25.9213	23.1273	13.3624	19.7208	19.3114	20.8027	19.38	24.7661	18.3473	18.8111
LOC101111922	94.9564	97.5908	133.506	50.0196	46.927	27.959	34.0309	37.8935	17.227	4.05108	70.4385	32.0828	33.6022
CCND1	169.938	124.088	90.7649	87.6783	92.4495	69.8678	73.8681	65.4728	69.6254	26.1551	105.997	50.7649	76.8464
DHCR7	77.9765	72.0317	6.73179	41.3207	21.8774	24.314	29.3826	30.2433	15.0168	10.0929	28.9693	22.6442	25.576
KCNQ1	15.0592	27.9343	775.051	55.0023	63.1403	63.3476	42.6528	65.2235	83.733	10.8108	67.3751	74.1716	104.148
KRTAP5.4	847.931	552.074	30.4761	99.5852	210.192	103.661	91.9987	89.5807	81.601	112.705	102.777	53.1518	97.9372
DUSP8	20.2888	32.3594	76.476	14.505	6.36239	9.30055	7.44645	6.61256	9.05094	3.43463	9.36861	4.52966	11.5168
CD151	67.5707	71.962	10.7602	27.0248	29.09	13.6074	20.154	18.5466	30.2012	6.69495	40.1176	15.3543	20.0861
SLC25A22	9.59614	15.0408	22.1933	8.38142	2.78373	3.5005	2.76651	3.99359	1.80304	0.879482	3.82398	1.54848	4.15298
EPS8L2	27.8619	39.9827	7.1274	26.2957	9.57633	17.8557	8.05204	20.3974	6.81052	2.31574	21.7933	6.99394	13.7533
ATHL1	6.14711	12.9246	5.0568	5.21261	3.02972	3.2979	1.72056	2.08193	2.35485	1.90701	2.57641	1.40207	3.01331
PRKG1	5.35181	8.56309	0.0571734	21.3577	32.8659	31.1878	15.8229	55.5848	65.2346	3.57038	66.5461	45.245	81.7042
LOC101123254	0.228597	0.545017	5.4025	1.59728	1.63233	2.82363	1.27812	2.79807	0.579847	0.203846	1.82188	6.50955	1.5829
TM4SF18	7.05831	8.14012	7.29185	17.1836	24.2364	15.8229	15.3094	66.1368	47.5032	9.8571	28.4905	52.4142	27.4744
LOC101121993	0.649953	3.96011	0.170042	1.05426	0.725169	0.744473	0.584034	262.397	272.339	2.8013	118.555	122.815	109.862
PDE6C	0.181302	0.380226	0.103238	3.18903	3.74224	0.998582	2.7454	0.443834	2.87426	1.26867	1.40481	2.92557	2.26671
LOC101106985	0.18575	0.19136	39.0723	1.35198	0.598711	2.57169	0.468794	0.934709	3.63553	0.567464	3.76953	1.55745	4.7042
PI4K2A	31.7774	35.76	4.31448	17.6524	15.7637	13.4541	12.9214	16.7799	12.8107	14.6507	14.2095	9.54097	14.1625
HPSE2	5.79042	8.62838	0.178297	29.2208	18.9239	32.3371	73.4764	38.0366	64.3945	4.21324	56.2437	43.7642	66.9298
ABCC2	0.184163	0.299013	13.5211	0.994506	0.550142	0.759547	0.503423	0.719885	0.644616	0.128023	1.27244	0.913512	1.8854
CWF19L1	14.0193	22.898	41.341	46.1065	35.9861	50.5674	34.7147	48.3767	34.1317	16.7729	41.6863	33.4419	58.8216
LZTS2	35.9459	44.8174	119.663	26.5556	23.1856	16.3629	14.5928	16.1936	17.5257	14.2752	18.4899	12.4449	14.7144
ACTR1A	74.9948	119.27	2.20787	75.0775	55.1913	47.3769	55.5136	53.7191	45.756	10.0274	61.9368	38.4715	58.7258
CYP17	2.3088	3.50783	0.571524	0.5272	0.782897	0.711241	1.38422	0.41559	0.191385	0.336407	0.300665	0.0644564	0.130613
LOC106990808	1.37108	1.45284	2.48471	5.45538	11.932	11.4885	9.42269	5.37032	4.76588	1.83394	4.09772	5.85645	4.6151
CNNM2	2.54812	5.24346	199.612	9.42776	10.7628	11.323	9.22236	12.8471	10.5587	1.80335	12.6674	11.4456	11.6184
COL17A1	190.506	160.559	7.52242	82.0581	71.4053	45.1482	53.0966	68.2526	27.3582	20.5241	72.1489	30.9422	47.4729
ITPRIP	4.55551	7.07071	0.088442	3.2005	2.30586	1.90577	2.32794	4.75793	3.69313	1.74489	4.1616	2.46675	3.55228
SORCS3	0.121241	0.374707	0.191456	0.676542	0.946899	1.56544	1.74765	0.618336	1.2102	0.442965	0.821998	1.33783	0.685025
SORCS1	0.147212	0.584966	3.19491	1.92008	2.0301	1.18034	4.55268	1.44152	1.41896	0.319429	2.11185	1.17376	3.33839
PNLIPRP3	1.09493	2.94892	0.790635	8.20852	6.35255	15.3833	11.5265	9.85061	13.6553	3.8784	9.05974	5.48239	6.16019
ENO4	0.775932	1.25615	17.8201	2.88655	1.66733	5.32462	2.08382	6.3317	1.86289	1.06777	3.24472	2.29139	2.98493
GRK5	22.3791	44.4418	19.9187	86.888	56.1891	88.9912	54.3518	160.549	129.158	20.6251	137.07	97.6194	219.259
MKI67	13.5311	26.6783	5.62072	11.4683	6.42487	7.99955	5.12301	6.63624	5.33232	1.46728	4.03503	3.66696	4.66798
EBF3	4.07065	13.7602	1.43248	21.1717	17.9777	19.0207	13.4468	33.0613	35.4935	4.85247	47.8046	22.1569	46.4887
SPRN	2.68096	3.03453	0.558358	0.78053	0.951749	0.950677	0.830393	0.0894966	0.412144	0.489002	0.485609	0.24291	0.175796
LOC106991863	0.840465	1.11323	0.996467	3.17335	2.49084	2.33355	1.69794	3.43987	2.92393	0.50745	15.3068	5.31018	8.82811
DOK6	1.17182	2.918	12.1092	4.91272	5.3866	7.61806	4.66817	6.54053	9.51159	2.3337	12.1409	10.0106	8.85795
TFDP2	12.1612	17.8539	1.0198	38.0409	47.2938	55.1063	45.0609	51.7551	50.0008	9.06315	49.1382	53.4718	65.6109
KLHL14	0.715482	1.44701	0.819116	4.0317	2.33476	5.63502	3.52184	4.60482	5.1822	1.212	5.13511	3.53809	4.71679
PSMA8	1.5966	2.41301	8.80998	7.27045	6.16627	9.55899	5.1501	7.1406	7.12475	1.27771	7.06925	6.64488	10.6894
CABYR	10.1332	13.7628	22.4919	42.0048	16.8691	38.2364	16.3	38.391	28.5594	24.4069	37.7628	29.2677	40.977
THOC1	28.4908	41.3626	4.16358	77.7871	63.7211	85.4363	67.9751	82.7321	63.3642	42.6919	74.8752	56.1531	92.5793
DLGAP1	2.99651	7.0009	0.622516	14.0149	11.6551	14.9711	10.5561	13.5334	12.7657	2.76278	18.1508	12.3648	18.6518
SLC14A2	0.497803	1.00338	7.24911	2.14244	2.1975	3.04864	2.70388	4.31822	5.124	6.40121	8.22949	4.06775	13.0823
HAUS1	9.13692	12.1023	1.36701	22.5024	19.1874	23.8974	21.4868	21.3201	17.5436	19.3229	24.1541	19.9658	25.4059
CLSTN2	1.52791	1.15175	11.6439	4.05053	5.39139	3.49945	3.13627	13.3803	12.0435	0.664624	13.7365	10.4174	13.637
LOC101115926	18.6224	30.6043	30.3541	75.6777	37.8034	86.0347	51.1414	100.463	52.1205	35.1084	77.3006	41.8587	85.3192
CXXC1	35.6356	46.8956	0.285467	31.7383	17.4177	20.7332	15.2494	21.0837	16.8938	14.3908	26.7407	12.3797	19.9548
MAPK4	0.16602	0.659701	0.146948	1.88807	1.03035	1.50653	0.824902	1.56218	1.33061	0.185055	2.25693	1.47737	5.3887
DCC	0.221961	0.45829	14.0573	1.09286	2.11229	1.60567	1.18627	3.58783	3.11866	1.11577	3.81547	3.52279	3.03246
CCBE1	11.9734	38.072	0.542204	59.6976	47.5532	62.8828	30.3569	70.6339	59.2355	14.2305	81.4671	45.2001	178.114
CDH20	0.179087	0.524357	10.1455	1.79743	0.673052	2.49192	0.930489	1.53444	1.46108	0.28017	1.84672	1.7178	2.18917
RNF152	4.15138	5.46727	93.9407	4.04027	2.83201	2.3647	3.12934	2.8746	2.50718	1.07531	2.36327	3.31002	3.90122
SERPINB12	38.4328	81.9492	38.2024	23.4769	27.7013	14.3321	20.7633	26.0898	31.3991	30.3643	29.2444	19.1019	24.7961
JMJD8	27.2373	40.0159	11.9302	16.1351	15.0061	8.34827	11.8089	14.9736	11.4291	4.97214	17.6184	8.85313	11.5049
LOC105604843	8.02882	13.2619	5.33922	7.15	3.05624	3.32621	2.18676	3.58412	2.86182	1.33363	5.56761	3.9674	2.72524
TELO2	6.00276	9.23876	43.3998	5.35367	2.0281	3.18332	1.45875	2.8976	1.6382	1.53925	3.2638	1.0232	2.62224
HN1L	32.2147	46.004	13.9003	25.26	21.0637	12.9842	16.376	17.2246	12.302	15.1633	15.3397	8.86466	13.0185
MLST8	14.9941	15.0989	194.727	9.08879	9.28821	5.99627	7.64462	7.52651	7.86529	5.0966	7.85363	4.98362	8.87049
DNASE1L2	165.645	103.424	8.76501	80.7446	63.3622	61.807	52.4388	63.4871	31.5515	31.5619	146.04	47.9782	73.5253
ZNF213	8.63614	9.28379	0.939864	5.95176	4.70141	5.83139	3.53544	4.23853	2.58686	2.75924	4.36413	3.02949	7.22225
TIGD7	0.768275	1.26096	1.56187	2.11518	2.01252	3.11258	2.02813	2.88248	2.98905	0.81913	4.40924	2.09263	4.93918
SLC35G2	2.2562	3.25527	9.08221	7.683	6.06849	8.46885	5.42041	6.26298	8.00533	1.5269	7.96058	8.43253	12.2635
GLIS2	6.53311	11.8161	225.979	6.44473	3.84808	3.84477	2.20186	2.73997	4.90698	1.25682	3.7443	2.1484	3.01395
PPL	191.206	229.474	0.459029	87.6421	69.1567	64.0219	43.5501	96.1054	76.6489	93.8571	96.0858	39.8621	79.2407
RBFOX1	0.212513	0.255894	237.392	0.913999	0.872981	3.31784	3.02956	2.36472	1.70154	1.03365	2.19731	2.87448	2.13204
EMP2	201.832	205.472	25459	124.161	104.095	92.6434	115.964	96.3383	56.2848	34.6591	134.774	77.8501	77.3203
CLEC16A	16077.2	26552.8	0.0739237	3676.69	2961.15	3202.78	2084.74	3463.95	3353.82	3355.18	2679.17	2482.68	2660.28
LOC106991887	0.206899	0.626393	16.2255	1.85011	0.659549	1.50519	0.826288	1.95363	2.08257	0.417314	1.17782	1.17833	2.72886
SNN	7.5118	13.1155	9.72387	7.28271	4.14086	3.21704	4.39658	3.94313	3.40998	0.452301	4.85587	2.53644	3.89768
CPPED1	12.9597	15.7173	0	31.0688	34.8834	39.0542	27.42	47.9357	41.1481	7.55384	62.7385	54.7219	59.4165
PLA2G10	0.0798038	0.739926	4.95967	5.11147	1.33559	2.76698	1.5338	2.34435	3.82361	0.177908	1.72256	2.2725	4.95033
ITPRIPL2	1.20998	3.33891	12.4148	1.12532	1.12501	1.31103	0.675347	1.0285	0.284184	0.449572	1.84162	0.622116	1.01821
CEP63	11.1354	14.5893	41.9054	35.7597	27.7047	41.8229	27.8337	37.2235	34.6856	7.61061	34.3309	26.4817	40.351
PPCS	27.7627	30.4506	9.39982	24.6738	13.3684	10.0271	16.5949	7.86954	12.2174	2.96791	19.5709	8.04444	10.68
SH2B1	7.26241	13.1556	52.7132	8.37419	4.66313	5.71657	3.54019	5.69928	3.69504	2.83417	7.91578	3.19032	5.06639
ATXN2L	38.2242	81.4322	123.485	50.4827	22.999	33.8082	17.0813	33.7155	26.5349	8.37205	43.0734	14.5623	39.3125
MAPK3	111.862	125.952	92.9052	65.4162	62.6134	37.9161	55.8359	45.5964	53.4792	39.9048	63.0119	45.5383	59.4767
MAZ	82.05	112.104	7.36502	59.582	43.9079	33.2784	26.4462	28.2534	42.3037	14.95	45.2369	23.8854	32.0247
LOC101102954	4.88399	6.91303	6.88067	3.06688	3.31226	3.24256	3.76478	4.6887	3.74488	1.70791	4.1739	2.31795	2.86658
LOC101122752	4.67945	4.90403	20.7785	3.81763	3.0121	2.61869	1.84187	1.85679	2.35509	1.73866	2.90295	2.30629	2.15126
SRCAP	17.2733	27.4317	37.4906	14.8648	8.19966	10.0584	5.38732	11.9715	9.44536	4.04458	15.4687	7.08863	16.0064
RNF40	28.6563	39.9192	7.33043	18.8052	12.7441	11.9397	10.7579	15.8651	11.9606	13.8437	14.3076	6.86162	13.842
ZNF646	4.68169	8.12604	0.393345	3.33656	2.72056	2.34611	1.99388	2.37576	1.99297	2.10913	2.62352	1.38871	2.64522
CALN1	0.61824	0.689589	370.393	2.92095	2.77124	3.30234	2.00881	5.32371	1.80358	0.233738	6.5913	3.86076	7.47914
EIF4H	253.138	359.561	272.739	185.358	173.342	116.458	179.168	144.897	150.54	139.706	158.637	110.119	128.901
CLDN4	302.282	209.04	7.05736	83.1751	94.71	54.1898	78.5399	69.7083	63.2785	99.13	88.6445	60.1306	49.3611
DNAJC30	4.63272	5.80155	0.337095	3.18799	2.2555	1.09519	1.10379	1.54651	1.06828	0.625927	1.39856	0.599645	1.94418
CPNE4	0.509982	1.35099	1722.38	2.40742	2.82061	2.37606	2.03034	2.39882	2.38186	0.633421	3.37496	3.03931	2.92175
HSPB1	2104.56	1441.4	44.6072	564.812	748.61	291.629	569.124	292.224	539.589	666.559	542.607	338.829	356.42
YWHAG	10.0453	32.6179	0.894328	25.0222	11.0446	9.06138	12.1839	9.78879	9.82662	1.34075	12.8737	6.70001	11.6774
LOC101102114	1.65468	2.60033	10.4699	5.08279	7.44727	8.59969	5.24323	7.38056	8.00311	1.21918	6.19331	8.28575	10.3573
NEK11	18.1099	24.8713	30.0721	50.4727	56.5216	58.5709	46.8008	76.3399	79.3822	6.58224	87.9413	66.4275	116.578
EPHB4	26.8731	32.5785	5.69687	17.4074	13.1425	10.8383	8.91579	12.3459	12.1975	11.0922	16.4107	5.63577	12.8133
NYAP1	6.59064	7.34473	6.95546	3.72343	3.2913	2.83213	1.69632	2.0339	2.10481	0.360725	3.00699	2.04689	2.42402
LOC101106648	5.62465	9.45782	18.0722	4.21241	3.15875	2.79608	2.15594	2.22334	2.80684	1.95487	3.95194	1.58741	3.83113
TNRC18	14.6823	28.8503	12.4795	16.3025	8.89203	11.8095	5.73324	12.0774	7.3464	3.72396	16.6703	5.63262	12.279
FOXK1	6.96322	16.3254	54.9863	8.07652	4.75005	6.64366	3.741	7.45962	4.56519	2.5088	6.75973	4.66554	5.4433
GNA12	33.4321	60.053	37.4767	30.2456	19.0798	19.8954	17.1058	24.4116	20.3631	17.4572	24.8092	15.6133	32.5944
TTYH3	25.1548	47.9509	60.7598	21.1443	12.5116	11.7584	8.11933	11.6484	11.7245	5.97585	13.4448	4.67503	11.922
TMEM184A	75.1723	72.9551	61.7965	35.7062	23.1065	28.3276	17.1943	29.628	17.6761	29.8623	29.2161	15.0152	17.1626
LOC101120042	53.5386	48.664	0.0280983	40.9556	28.0562	27.5252	30.0711	14.822	20.0415	6.77758	23.3573	14.4533	15.536
TRIM67	0	0.00992046	0.708103	0.174443	0.100277	0.105497	0.0785178	0.0550052	0.179426	0.322807	0.0746146	0.181286	0.226896
PCNXL2	0.735122	0.763172	0.22854	2.55959	1.03078	2.22808	2.12626	2.35894	2.26785	0.531509	1.94634	1.72559	2.47922
RYR2	0.450586	0.676119	36.9863	1.62373	1.14608	1.70363	1.32131	2.44908	4.22272	0.330149	3.50529	2.94304	4.22733
RET	26.8877	52.8112	0.0731251	33.2961	16.8284	14.2673	9.34758	11.0455	12.5089	11.9472	10.1825	7.28949	16.1528
LOC105605088	0.116951	0.154906	31.956	1.14915	1.14174	0.950379	1.25159	1.57465	1.19484	0	1.99037	2.12307	1.30751
ADO	14.9767	30.4999	1.0831	12.3996	7.62389	8.62082	11.0396	4.92666	9.36538	2.29541	5.90593	6.53045	3.51085
CTNNA3	4.04812	4.21472	94.5711	13.4027	15.3984	13.0157	10.5602	24.4522	20.5631	2.78432	19.6016	26.0843	20.6701
UNC5B	59.1665	82.2158	8.34809	61.5614	26.268	41.0775	19.6645	41.2872	18.7901	6.96538	33.136	20.6453	36.7884
SPOCK2	9.08243	10.3858	1.87672	4.4624	5.55434	3.45873	2.4678	4.85306	5.73005	2.81452	5.80497	3.64322	8.88098
MSS51	2.9474	7.2886	12.9607	16.3945	10.499	17.1836	10.3941	16.0359	9.35481	4.46083	17.7345	10.7223	20.4402
ZNF503	8.40924	14.5909	9.80273	5.91736	4.22381	3.32855	3.55124	1.6712	3.71687	1.77553	5.92506	1.98816	2.77537
C25H10orf11	21.3676	35.8066	20.2636	119.478	90.648	134.97	81.8368	178.567	167.452	13.5556	152.618	143.355	256.849
MAT1A	18.5286	18.7981	0.120163	12.7637	7.46225	6.90802	8.30131	6.04007	5.05734	3.04063	6.27481	4.93558	5.31445
SH2D4B	0.134526	0.10182	5.43892	0.587484	0.557491	0.624686	0.537253	2.1406	0.785373	0.271338	1.43591	1.45022	4.2417
NRG3	4.77679	9.97068	468.388	45.1033	27.5604	78.7029	72.4202	33.8527	55.0562	5.27614	25.3987	20.4831	19.1445
LOC101114082	383.647	381.108	0.139501	283.015	224.854	138.914	228.682	217.904	132.819	116.084	303.373	191.817	256.996
CHAT	0.0495794	0.114923	21.3951	1.24497	0.760609	2.61884	1.49432	0.667547	1.27507	0.95791	1.72874	2.61188	4.72049
ICOSLG	9.82847	15.8308	0.0891274	7.28609	4.16297	3.51688	4.34617	3.97294	2.13738	1.03693	4.58343	2.67783	3.28204
DLGAP2	0.106908	0.153404	0.238313	0.499296	0.263409	0.501954	0.237383	0.398023	0.608891	0.122475	0.606484	0.52007	0.430541
CSMD1	0.236768	0.481889	121.305	2.19407	1.99093	2.59044	2.04323	4.01491	2.49832	0.742396	5.28323	3.26423	3.05737
LOC106990811	179.011	90.6861	70.3839	9.3066	33.2014	6.99012	5.63603	7.96773	12.1216	25.0931	12.8348	5.29614	14.3373
LOC105604740	89.7616	54.9886	71.4494	4.76908	18.9618	3.43882	2.99627	7.83218	8.83673	16.0527	4.8872	2.73317	8.27074
LOC101108536	77.0585	67.7061	109.104	6.7299	18.9587	4.57448	4.02364	10.8692	8.21127	12.1085	7.93692	3.47754	11.1994
LOC106990888	181.528	64.811	31.8294	7.31483	34.5501	7.69053	4.93866	10.1486	13.7198	23.1513	12.0979	4.56106	10.6922
LOC101108798	64.9293	27.3028	178.717	3.60752	9.07573	3.75924	2.06313	3.85418	3.65663	8.08126	4.35683	2.73977	2.98621
LOC105604734	214.737	113.417	2.10454	7.15857	34.6531	6.30985	5.6905	16.685	12.8872	36.8958	11.6031	4.48358	17.9842
MTMR7	1.95639	3.70588	66.3242	7.25757	8.98937	12.0804	5.23769	7.85346	9.99019	1.68829	9.11636	17.8813	13.9899
LOC106990889	68.5634	48.2822	0.797456	3.90394	10.9058	2.6764	2.62036	2.59154	4.8235	11.1969	6.2106	1.95945	4.88689
SGCZ	0.13551	0.432886	22.6579	6.34717	2.49912	5.98534	1.72005	6.0395	5.7962	0.965518	4.08968	5.73145	7.06046
DLC1	22.4985	39.8795	261.499	91.5207	99.9853	118.745	80.341	131.448	156.868	8.17299	142.457	125.486	207.161
LOC101104203	311.459	223.91	53.0407	25.3214	79.7178	22.9816	32.1901	20.5131	42.6993	50.6759	31.5527	14.8068	28.4392
LOC105604748	52.7778	29.6242	2.60388	5.95538	11.1846	4.74098	3.11251	4.32774	7.38779	12.3819	8.23231	2.89317	7.8169
NRG1	2.26731	4.84183	31.9963	11.4676	6.45976	9.88303	5.81597	16.3328	21.1185	0.795146	24.0089	20.3904	60.6932
STAR	42.88	24.2072	0.636214	6.11495	4.93032	5.49729	6.33878	2.27038	1.69132	0	0.815235	0.621403	1.1018
ADAM32	1.69127	1.65736	1.65856	2.74219	4.66379	5.02077	2.64273	4.30859	4.86354	2.4114	4.93139	5.26636	6.54581
LRRC3B	1.90101	4.33325	3.55294	6.24248	5.86975	5.79607	6.48853	13.2036	19.2506	3.18667	13.5799	5.85395	7.7169
NKIRAS1	8.32973	15.0529	2.12621	33.0867	21.253	43.3077	20.59	31.8518	23.9314	21.9764	33.8794	24.1795	53.375
ZNF385D	2.46983	3.88776	13.1698	6.878	12.2407	6.61266	3.03328	19.3655	30.0128	4.77456	21.9307	12.308	46.654
AKAP17A	8.64895	18.4979	25.1551	11.3682	3.83156	4.38242	3.84461	4.20345	2.47345	1.37993	4.39264	2.53532	4.22011
ZBED1	17.8624	22.0775	56.014	10.472	8.57152	5.91212	7.20957	5.25	6.54155	2.01727	8.92457	4.87007	8.92875
MXRA5	28.931	56.2763	156.909	26.8694	18.2397	14.1941	10.9982	12.8785	10.353	13.7525	18.1563	9.55983	11.7389
COL6A2	86.4513	159.41	3.93029	44.543	38.8202	24.8286	14.222	29.7317	58.7936	33.9671	44.3271	18.3325	54.2351
LOC101116281	3.31751	4.16292	3.60137	7.24391	51.0408	48.9995	35.6941	17.8457	1790.53	96.4045	250.049	362.466	2036.61
ARHGAP6	4.24309	9.23141	45.3839	11.5385	21.364	18.8299	10.7656	19.581	24.2608	2.65662	22.4845	19.1394	37.1298
LSS	52.7481	47.2991	0.0480627	28.7091	22.432	19.8613	17.5892	27.6333	9.64418	9.1056	29.0682	11.6243	38.7739
FRMPD4	0.121707	0.169692	0.155179	0.438259	0.639652	0.572599	0.598783	0.572367	0.798873	0.207063	0.787052	0.506183	1.21515
GLRA2	0.791078	0.616364	4.58772	1.69348	3.30552	2.57142	1.328	3.94912	3.1039	0.26511	9.40048	3.51153	8.30166
ASB11	5.46306	10.1411	0.0330538	28.0951	18.1523	29.7692	15.2236	25.3321	16.6333	13.8679	24.2328	23.2214	29.6254
BEND2	0.0132159	0.10503	12.6543	0.423243	0.309652	0.32935	0.127002	0.242648	0.316604	0.314266	0.394982	0.225803	0.629148
SMS	14.7554	18.2627	0.609616	36.5619	39.1334	50.1908	27.3661	49.7415	55.4487	15.2789	51.0744	34.8426	59.4379
IL1RAPL1	0.974973	1.64764	0.27988	7.26759	11.3094	10.6732	5.47766	13.4976	19.306	3.24779	11.276	14.1929	20.4182
LOC101119796	0.167857	0.741114	0.501203	0.447972	5.55604	6.97187	10.1184	3.90374	6.30781	0.706833	7.43218	4.81975	5.52905
SYTL5	0.419878	1.31453	97.9514	3.58394	1.54382	2.98815	1.81739	3.36396	3.69806	0.666574	1.53692	3.05706	4.17114
MID1IP1	80.3046	76.5914	3.01402	26.2864	35.0243	17.787	28.3315	28.0079	24.5025	17.4269	35.9902	21.7037	26.7263
EFHC2	3.00045	4.69089	7.87975	9.59468	8.39662	11.5118	7.49848	11.8306	12.3381	3.30792	11.883	11.6256	13.9077
LOC101108987	9.83391	12.8886	5.16532	37.051	38.8167	49.2241	35.0321	37.9566	31.1802	4.52888	47.5434	35.2687	51.7381
ARHGEF9	8.80747	14.8804	7.87767	38.0184	31.3271	44.1799	30.0333	41.3122	56.4856	3.75016	57.481	35.9957	65.1043
MTMR8	9.74379	14.4668	0.392561	56.5379	45.584	68.3046	46.0855	60.354	55.5941	4.39491	75.3237	54.3638	69.4968
ZC3H12B	0.614753	1.00484	4.92897	3.46532	3.26895	4.5776	2.77671	4.62688	3.72327	1.37048	3.86572	4.28332	5.6229
VSIG4	2.73983	8.46773	38.8845	16.933	14.2119	16.4577	6.38284	18.8861	24.1817	7.03663	23.1448	18.3415	29.0539
UBQLN2	25.3793	35.5149	0.699009	19.3182	18.5893	12.3009	16.4342	19.5636	17.3907	12.453	21.327	12.0818	17.0482
KLF8	0.83473	1.17474	46.6685	4.61091	6.14511	6.91249	3.28156	6.1121	6.25957	1.40673	8.19207	6.04858	10.3322
KDM5C	33.8998	52.6552	5.72675	35.9822	20.1932	27.3258	17.3328	27.0972	16.7932	17.6975	27.8708	13.0209	26.2406
CLCN5	4.22321	8.47654	35.9242	20.1403	14.078	22.4934	12.783	20.1856	14.8418	4.36568	18.4445	16.8309	23.9769
TFE3	22.3085	47.9126	1.56542	32.059	15.5325	19.1023	12.0623	18.332	12.5024	5.04534	20.8413	8.61093	20.5355
KCND1	1.23161	1.88539	5.11081	1.23442	1.02498	0.721924	0.564438	0.803186	0.768208	0.150036	0.888379	0.503076	0.786412
TBC1D25	5.4904	5.74049	95.2361	3.80821	2.81861	2.96837	2.49144	2.91352	2.53154	1.88562	3.03872	2.07821	3.10984
EBP	114.327	65.8612	30.1364	58.8611	56.406	30.3929	31.3685	43.8369	36.9236	19.0931	66.1402	31.1874	38.1319
ARAF	18.7664	27.8905	1.69556	16.4705	11.1365	11.0372	10.661	15.481	10.0676	2.54014	19.0135	8.56587	12.0814
LOC105605487	4.06762	6.61224	35.9736	16.8665	16.0905	20.9013	9.93379	19.425	14.8947	1.90062	25.3779	13.6013	35.0296
OPHN1	52.82	73.3738	88.06	328.85	258.637	384.427	214.634	440.108	333.445	22.9294	422.451	304.108	534.469
EFNB1	64.8139	87.4355	3.83003	55.5507	43.3887	36.1562	37.7858	34.8752	25.5618	6.0403	42.0518	20.7711	34.746
EDA	4.90037	7.31834	35.8329	21.9888	18.9858	28.4727	17.7343	15.1453	17.3157	4.13309	18.0833	10.9891	17.7967
SNX12	32.0325	33.9823	7.37013	19.6511	20.2539	14.5681	19.5332	17.2875	16.06	8.21679	21.8061	15.7629	17.2234
ZMYM3	5.98463	10.4738	0.669829	5.78025	4.6842	4.25308	3.26022	4.72105	2.99822	2.13906	5.42177	2.12214	4.25102
ACRC	1.4183	3.22761	2.92339	9.15899	5.39544	8.93439	4.4751	7.28579	5.44317	2.61245	10.2965	5.59629	13.0053
NHSL2	1.92735	4.18963	35.4526	8.3095	7.89164	8.75289	4.83379	7.37646	8.58337	2.66914	9.66932	5.84942	11.7999
PIN4	68.1635	48.9796	7.29584	97.4308	120.748	131.151	152.91	117.078	142.954	96.817	117.475	176.553	156.655
HDAC8	9.02913	14.4127	7.10543	40.0151	34.3722	49.8188	33.696	40.6367	45.1531	5.40208	45.7186	46.1487	62.3433
PHKA1	6.45933	13.1986	118.311	30.4511	20.9108	27.8571	19.2504	27.0753	29.4784	5.11505	26.6363	20.1042	42.003
LOC101112542	189.851	414.967	47.2418	1002.41	650.694	1135.09	622.033	878.943	655.62	162.934	952.5	632.625	993.085
EAF1	23.3656	49.8755	1.05321	30.5315	15.8744	20.9977	16.0729	16.4393	15.5559	3.23564	19.6525	14.4074	18.0478
LOC105605519	1.05659	0.892436	11.0964	3.07614	2.13562	2.55512	2.19393	2.6428	3.94893	0.842053	4.04262	3.18318	3.26935
CHM	8.78852	12.7647	0.195512	25.4456	26.4007	37.6038	29.6205	33.3699	37.1883	4.95439	34.6995	37.1425	44.6797
DACH2	0.603039	0.857919	81.3425	2.601	2.16799	3.12179	2.47803	3.99137	4.37489	1.72609	3.523	4.42025	3.47974
G6PD	72.6167	67.9948	118.042	32.3527	28.526	18.85	19.9652	29.1968	25.4821	27.9574	37.7557	18.3438	26.7041
ATP6AP1	113.507	111.155	90.8383	44.5175	45.9421	23.1558	32.0285	45.9064	37.6237	25.2753	53.1262	29.2711	34.3902
LOC105605699	38.5865	110.786	9.1445	22.0496	11.5956	14.0162	8.21014	16.9841	11.7633	14.2958	19.8263	7.16262	17.5446
HCFC1	6.64774	15.6893	1.65929	8.35746	4.1468	6.08972	3.03578	5.73285	3.83234	1.50444	6.32164	2.36627	5.31805
ATP2B3	1.99031	0.966628	739.846	0.36216	0.296085	0.341449	0.347754	0.345125	0.397337	0	0.853708	0.377842	0.311046
BGN	694.418	719.163	38.2636	337.715	330.484	164.056	192.78	147.235	217.636	316.541	151.865	128.47	119.486
IDS	21.2104	33.9528	76.561	16.7408	15.3044	10.7691	11.4925	16.2039	13.3022	2.84605	18.8701	10.4468	19.4727
GPC1	75.6692	64.5253	22.9516	33.3275	26.7682	23.2611	20.6402	26.8595	18.6053	20.8179	29.5123	16.1425	15.2475
LDOC1	23.3685	18.4551	137.654	7.90225	14.1324	4.59345	7.33951	8.95439	14.4618	4.11079	13.606	5.48401	9.65836
LOC105605706	69.799	107.911	0.0167114	50.4698	41.2362	20.7047	40.0853	44.8185	24.3482	2.97603	35.9078	24.4377	26.906
ATP1B4	0.0668173	0.070802	184.482	0.661405	0.536758	0.883246	0.40861	0.196285	0.33897	0.139026	0.310638	0.399566	0.694006
ZDHHC9	160.387	146.2	6.98112	91.1735	92.6724	72.5611	74.7095	90.1677	51.3952	21.5527	100.074	65.7847	77.2168
ENOX2	6.11864	11.3462	53.1483	20.5961	18.3736	24.7632	19.8135	23.1527	24.6681	4.15707	26.6657	23.5964	26.9003
LOC105605723	37.8673	37.3687	0.269245	29.133	18.1611	15.35	14.8348	15.0542	6.11907	0.648954	27.1877	11.6742	14.9078
IL1RAPL2	1.01672	1.09319	0.545357	2.35063	3.46986	4.18617	2.80051	4.0409	3.52288	2.52435	5.5212	4.70046	7.57508
LOC101118931	0.73111	1.51205	273.172	1.94183	3.11976	2.32091	1.50153	3.10857	3.88613	0.638606	3.17323	2.33759	6.38365
RPL36A	392.528	296.109	11.8839	594.56	892.62	813.495	1492.71	1660.72	1218.89	1781.29	707.086	1863.33	758.748
LOC101106998	6.71702	12.2334	0	7.61122	3.44911	3.9698	5.20128	3.64373	3.38825	0.623931	3.04168	1.7932	2.36742
DCDC2C	0.0842314	0.111568	7.88482	1.34876	0.469895	1.09519	1.17738	0.721705	0.71219	0.312964	0.769209	0.419752	1.0936
LOC101103133	2.14645	5.68613	9.94679	0.781142	0.598711	0	0	0.985234	1.13428	0	1.11373	0.573023	0.580582
LOC101108031	5.23429	12.3028	27.9761	5.90139	1.88942	3.28052	2.64503	4.52249	1.15704	0.838938	3.74902	1.2421	3.70143
ENTPD2	20.5535	34.4864	6.90279	16.9018	13.2816	9.30827	7.53073	9.22336	13.2631	3.61681	11.051	9.76865	7.78266
ABCA2	3.61756	8.78464	14.3164	4.64563	1.63536	2.29773	1.09886	1.66685	1.27446	0.509836	2.17478	1.05086	1.45462
LOC101103631	6.59144	11.7503	2.39513	3.89576	2.32239	2.25533	2.338	2.48714	4.05067	3.0199	5.26643	2.54028	6.86344
MAN1B1	2.01106	5.89827	30.5689	2.30016	1.06847	1.3489	1.25493	1.64105	1.95679	0.676049	1.98757	1.15898	1.17426
LOC101113831	4.88896	22.395	16.3697	3.13479	1.33122	1.57656	0.81354	4.16755	4.83905	0.562252	5.99152	2.69322	3.6943
LOC101123196	12.3234	20.8571	7.77039	9.72699	6.08036	6.08283	4.7131	6.60348	4.9011	0.814008	8.13916	3.70419	6.91351
LOC101101878	7.33743	8.09897	17.5319	3.67261	2.60593	2.72168	2.27145	1.92838	1.78541	2.39876	2.04878	1.6	2.84488
LOC101112462	14.2065	26.864	7.08845	13.8096	7.14318	7.59518	5.02159	4.97647	5.92689	2.53505	9.54393	3.45994	7.61788
LOC101115773	8.50254	14.1818	25.8336	32.5471	15.4595	35.5993	18.9826	42.3999	17.7507	12.7926	40.0866	16.8886	39.2198
LOC101122584	20.5673	37.9275	12.0412	13.859	6.10175	8.99664	4.22216	7.47236	4.65986	5.98115	8.9899	2.89734	6.91953
LOC101102298	9.54368	15.9142	2.91714	7.07038	4.65856	4.06241	2.97769	4.84997	3.60238	1.23476	5.51786	3.09378	3.81067
TSSK2	3.72418	4.49919	0.466118	2.38297	1.41549	0.931197	1.07259	1.30242	1.26877	0.729878	2.6501	0.349616	1.18076
MCP1	0.82002	0.296224	13.2957	4.88331	1.08127	6.78491	0.78151	3.01116	3.78185	6.64757	4.33219	2.44124	2.79606
LOC101108035	4.98635	13.7551	13.1087	6.77869	2.82768	4.01858	1.98008	4.23706	2.11963	0.30623	6.02127	1.58421	5.26117
LOC101108295	9.07768	16.4612	30.7922	9.12417	3.25549	4.6837	2.73789	6.34928	3.04576	1.28489	3.05037	3.69282	2.49435
LOC101112891	11.7884	33.2714	345.812	6.25467	1.96674	2.44713	0.529364	3.84328	14.2833	2.90635	3.47561	1.01961	1.74825
LOC105605931	220.359	321.752	1.34694	113.029	49.7285	45.2377	42.9167	52.0332	40.8026	25.0621	65.7214	32.2703	50.5302
CYP17A1	2.78249	2.31832	22.184	0.914617	0.350507	0.632147	1.17621	0.164798	0	0	0.149032	0.255595	0.38845
LOC101118597	21.9828	31.449	6.53772	17.4128	10.7273	8.99922	9.5037	17.9566	11.1953	7.21178	17.6129	6.61975	13.9351
LOC105605995	1.90552	6.21279	35.967	3.2006	1.85347	2.43523	1.40859	2.3922	1.51475	0.0726154	1.62251	1.32176	2.11452
LOC101109081	29.734	35.1512	4.15058	19.2147	15.8124	14.0009	14.4447	18.8778	9.39836	5.5755	31.1445	12.2654	16.0351
LOC105606028	4.13427	9.17813	3.00112	3.64484	1.03948	2.01894	1.83132	0.712735	1.39495	0.951948	1.16019	1.07779	1.84801
LOC101117232	2.77487	3.27809	19.7629	1.03713	1.54799	0.568815	0.622423	1.19336	0.317053	0	0.933919	0.694071	0.37866
LOC101118256	7.86957	16.4043	99.0927	6.66682	2.87878	3.35479	3.26844	3.71088	1.54529	0.239668	2.46335	2.38789	1.67496
LOC101119576	64.0298	71.8476	15.0022	31.0324	33.1382	17.8785	32.5088	34.2652	29.7739	10.5422	31.743	20.5772	21.6694
NPPC	4.07435	9.89387	34.7699	0	3.28312	0.245255	0.593237	1.3853	0.637949	0.504611	0	0.322282	0.653066
LOC101121082	13.5897	38.2762	13.8925	18.7592	7.14547	10.0702	3.13863	10.6114	4.40241	1.8572	8.16974	4.67046	6.30942
LOC101121333	4.82562	15.2666	1.19756	7.12569	1.74304	2.78357	1.27382	2.7621	1.46767	0.95453	1.78693	0.395438	1.50245
LOC105606048	2.79313	4.86237	43.659	17.774	14.6915	18.8501	6.76265	26.5693	25.3033	1.30466	32.7287	12.6124	21.7584
LOC105606063	19.0801	43.913	26.8121	19.3044	8.00191	12.4627	5.08336	10.4349	7.81835	1.00557	11.0094	3.27537	9.95571
LOC105606075	37.279	29.1778	14.1858	18.6259	12.1924	12.7771	4.47125	15.5769	15.5456	5.52502	24.9772	9.10894	20.8029
LOC105606081	5.58553	13.5762	8.92452	6.20289	1.60616	1.80935	1.71038	3.24219	3.4081	1.15533	4.1112	0.573907	3.48886
LOC105606096	4.85685	9.71532	55.9846	1.87574	1.1059	1.50356	0.606148	0.727943	0.83807	1.1785	0.82288	0.564507	2.14482
LOC105606098	52.588	62.3444	11.3237	21.6488	21.5536	12.1269	11.7868	8.2572	15.1238	1.4811	23.4201	14.844	14.5975
LOC101118429	7.83295	10.6326	9.41136	4.12426	4.98953	2.2873	3.44577	3.0259	2.73997	1.34165	3.7818	1.46328	1.48259
LOC105606113	7.24456	5.12395	15.4412	3.07161	0.941702	1.6766	0.675911	2.41058	0.892048	0.9408	1.28462	0.701009	0.913186
LOC101122769	9.65463	18.7109	6.19978	10.2817	3.79852	6.49677	3.72892	8.21001	3.07908	2.90752	7.00274	3.25571	5.86427
LOC101123021	3.16743	3.46577	9.41557	2.0047	0.768258	0.746076	1.08279	1.51709	1.1644	0	0.914635	0.588236	1.58932
LOC101123541	6.9329	10.5653	1.42047	5.20886	2.07936	2.82705	3.45167	1.82494	1.47072	1.16332	1.6091	0.424563	1.29049
LOC105606135	1.45394	3.67108	2.32756	0.661405	0.354857	1.18152	0.158774	0.500528	0.192083	0.270108	0.905288	0.38815	0.983175
LOC105606136	1.03599	3.97709	41.7197	0.766819	0.431005	0.551738	0.214759	0.902691	0.346418	0.548026	0.72887	0.125004	0.253305
LOC105606140	45.8617	60.9697	23.046	38.1138	27.1394	24.251	13.2814	20.0558	23.566	4.20509	34.0773	13.5888	23.6371
LOC101106506	22.9056	23.2848	9.00647	11.4157	8.8955	6.72682	5.42374	5.75935	7.8739	3.42367	11.5561	4.83846	10.5588
PTDSS2	9.14556	17.792	7.26661	13.646	5.93104	9.72351	7.54031	8.25582	4.7524	4.92718	11.199	5.53414	6.51417
LOC101107265	16.4292	17.11	0.0847333	38.5818	29.8045	42.3514	26.5874	42.9824	35.3464	43.4912	47.4775	29.2251	57.1104
ND4	0.45172	0.209413	1749.39	0.230148	8.46712	35.0196	0.986576	0.718787	5.63356	0.369242	0.637523	5.14529	22.5795
CYTB	2752.68	1806.83	0.227794	5609.98	6613.12	6559.46	7096.7	6968.41	6761.21	1567.35	6530.82	7023.7	6439.4
MUSK	0.189444	0.588714	7.20297	0.774284	1.17065	1.0658	0.681104	1.12374	2.06383	0.286968	2.00828	1.25529	2.73289
LOC101107405	6.27861	10.8835	135.103	6.96408	2.84015	5.3758	2.2954	5.35453	2.65433	2.47483	6.43624	2.98308	5.7495
PTPRF	105.422	157.643	10.9577	95.3219	53.618	67.2211	47.8817	74.4089	45.334	25.9902	83.282	40.7265	58.8936
FANCC	11.7514	18.1963	5.56791	51.8596	45.5271	75.2498	48.0712	51.3321	52.139	7.39434	51.3224	51.1201	53.1067
LOC101114490	8.03187	7.51638	3.75078	26.1798	15.0979	27.3375	16.0166	21.9064	16.7316	6.03339	27.9765	18.894	25.944
KIF27	3.59512	6.21768	5.63816	13.6816	15.4029	15.3254	10.7504	11.8813	15.9224	2.91581	19.7157	14.4495	33.7256
KIAA1161	3.1805	2.75447	202.911	3.20527	1.91077	1.8556	1.72514	1.98928	1.03429	0.441523	2.11814	1.0699	1.73946
AQP3	220.397	232.179	3.11102	71.913	52.2926	44.0223	62.7487	45.1488	27.1016	14.0186	46.1923	25.0833	27.1084
DNAJA1	4.18156	8.16777	56.1471	18.0686	14.8527	22.7685	13.4794	21.8014	15.8877	5.21167	27.2885	13.9046	39.6296
PHYHIP	68.4999	59.159	330.708	45.5115	33.8335	32.7038	24.5614	28.0826	21.002	16.0359	29.4293	20.6842	19.6684
HR	256.877	338.486	17.9894	186.632	111.814	115.209	85.3005	135.509	66.5717	52.864	118.816	62.0509	101.08
XPO7	10.7384	18.8952	88.2412	10.9565	8.38095	8.04139	7.99148	9.30463	7.76191	4.72876	8.73429	6.74189	7.64273
PLK3	67.1372	70.2993	1.31075	33.4619	27.6507	31.8217	20.8542	50.4561	30.1348	24.9655	52.3879	31.2734	37.9035
FAM221B	1.42008	3.17973	0.872273	4.47894	6.86583	5.27546	3.75137	7.94609	4.81234	1.85929	9.20696	4.04384	9.16989
LOC101109422	1.19974	1.21955	0.381418	2.59937	2.19465	3.17425	2.79091	15.2827	3.04713	2.1459	2.52478	3.47598	3.44133
TRPM3	0.930525	1.08873	1.72337	2.71664	1.83417	4.64348	2.28974	2.0818	4.50938	0.480193	4.30033	3.75385	4.24336
GLIS3	1.17079	3.10153	0.218902	4.06549	8.35474	4.63818	4.61336	10.8077	15.6566	0.833768	13.1622	11.1653	22.4843
INSL6	0.665181	0.741948	4.79589	2.24238	1.83587	2.88292	1.46808	1.62839	3.15745	0.442268	2.90646	4.18713	5.35345
PTPRD	4.69616	8.30718	1.6562	18.1438	28.4329	18.5469	14.8314	31.0731	25.6192	3.73479	28.4215	21.8678	30.9306
SH3GL2	2.70901	5.66139	0.26526	5.87141	10.2094	11.3496	9.67692	12.674	17.5606	2.32622	23.7893	10.2856	21.4504
SLC24A2	0.588145	1.0983	0.0460601	44.9974	3.50695	55.5044	43.3541	1.85286	14.4974	0.515866	14.36	21.0449	38.4863
IFNE	0	0.146359	31.6527	1.50127	0.452045	0.51881	0.193065	4.6887	6.85135	0.273704	2.07931	2.46479	1.11582
CDKN2B	13.8938	24.9624	0.367228	16.6206	9.59261	7.97419	12.7388	5.21974	8.52949	5.21338	7.30899	2.93793	3.4728
LINGO2	0.414577	0.720728	2.11514	4.3502	1.77312	4.07086	3.93873	2.23066	1.50923	1.14886	1.936	1.59867	1.90632
OCA2	2.49062	4.8007	12.8919	10.1192	12.6293	15.507	8.96322	14.9926	19.5395	1.80936	18.3315	11.697	28.3413
LOC101105114	8.19912	7.98537	1.29298	4.78293	3.43049	1.6004	4.05546	2.02931	1.35931	0.2912	5.15517	0.171676	0.217425
C2H2orf88	2.00328	3.06	18.3441	8.74846	8.0572	8.57726	5.19384	9.1754	8.05922	1.21252	14.2168	8.37281	16.7801
GULP1	16.5394	23.5656	9.99761	55.128	65.8633	74.1613	52.7191	67.3557	84.0804	15.0358	74.7627	65.4088	103.31
CALCRL	5.34881	10.0757	0.530899	16.9338	31.1878	24.7143	24.4402	21.4419	24.6858	4.98324	28.0445	43.8104	44.7173
ZNF804A	0.509448	2.66166	2.03191	3.5432	4.86301	4.4466	3.65116	5.8893	21.0853	1.00252	7.76954	9.16096	7.40366
HOXD3	2.3212	8.7112	24.0845	11.8827	8.4601	13.204	7.23265	12.4066	13.1386	12.8505	21.5829	9.6945	16.9659
CDCA7	21.7172	30.6594	14.2	19.6121	14.0845	13	10.4817	12.1425	10.7365	7.00647	12.2793	6.77591	14.343
DLX2	8.82606	16.8863	0.255099	10.2183	7.14085	7.99724	4.46404	5.87546	6.83706	1.5342	5.82757	2.49862	4.76533
CCDC173	0.407986	0.617595	12.4615	0.848431	1.65823	1.70508	1.80758	1.64083	1.35519	1.08277	1.69353	1.95014	3.27909
FASTKD1	9.41895	14.5009	0.0608257	33.2246	28.694	41.9462	36.2057	31.8801	33.8946	10.7728	33.8166	31.7582	29.499
LOC106990335	0.0486399	0.144958	0.02765	0.566438	0.827599	0.592896	0.520536	6.01315	0.908196	0.298193	1.73636	3.3415	2.06994
CSRNP3	0.0110553	0.0658947	0.253128	0.0885123	0.20969	0.221603	0.111068	0.270638	0.444004	0.0739373	0.146848	0.25185	0.287068
SCN3A	0.172429	0.24825	1.04136	0.458355	0.535329	0.690455	0.648396	0.697404	0.792346	0.139275	1.60576	0.619101	2.13055
AGBL4	1.76956	1.5396	0.896546	5.90951	4.72294	6.18436	3.84965	13.463	3.91162	1.98535	16.3038	9.60873	10.7366
KCNH7	0.232246	0.341057	45.717	2.15341	2.78275	7.26476	2.31564	5.17872	6.3108	0.855412	3.74719	5.2117	3.86747
FAP	35.1743	52.1555	127.76	105.519	120.626	128.866	89.5931	96.8561	117.005	45.4147	137.276	132.834	164.022
RBMS1	149.24	215.502	0.0420425	411.073	427.419	578.869	385.578	457.71	391.39	124.698	464.965	448.843	547.87
UPP2	0.0168099	0.133593	0.116804	0.61175	0.412614	0.291419	0.631473	1.17281	1.11335	0.0374745	0.33493	0.311142	1.01849
KCNJ3	0.0800604	0.123718	0.513594	0.174815	0.327527	0.621682	0.781022	0.604305	1.01539	0.188395	0.576034	0.455962	1.09719
GALNT13	0.282357	1.90398	9.80387	3.96079	4.4391	4.50562	4.7989	5.43551	11.4305	2.34618	2.72769	4.67807	3.85107
TNFAIP6	4.58391	6.12835	24.0866	13.0961	19.9318	15.7821	14.671	19.3494	63.3284	20.5653	64.5161	45.7472	116.865
CDKN2C	26.5387	23.2631	43.5244	11.2294	16.1853	8.62121	10.5539	10.0955	11.3493	4.86716	16.9974	8.15125	8.95866
LYPD6B	42.5976	58.3222	6.91994	281.511	166.639	239.011	147.018	241.448	167.486	25.828	221.552	184.334	156.351
ARHGAP15	5.28767	10.8477	0.2114	20.8362	42.2575	30.6981	26.5777	28.2369	38.851	3.78309	45.3678	77.8424	61.2363
LRP1B	0.27625	0.660815	0.439866	2.47283	3.1558	2.34095	1.89468	1.89255	1.2434	1.13059	1.90318	2.41279	2.40893
THSD7B	0.257946	0.590141	1.17111	1.74091	1.93609	1.95641	2.18176	1.95179	2.37924	0.723159	1.55741	2.33714	2.63859
TMEM163	1.69366	1.97941	12.2032	5.45299	4.51295	5.6996	3.79477	13.6823	17.6615	1.49547	11.7117	9.36207	16.959
TMEM185B	7.6867	13.4245	0.0428093	7.04269	5.25344	4.08141	4.67907	6.91601	5.75608	4.98599	5.74622	4.542	5.97738
CNTNAP5	0.068466	0.196487	1.49189	0.481716	0.49653	0.581105	0.937072	0.628527	1.12562	1.23802	0.928384	1.21853	1.11937
RAB3B	2.24566	2.57169	0.243712	8.4449	3.83661	6.86872	5.25204	12.1402	8.63665	1.87736	10.7199	12.1234	19.0999
TMEFF2	0.233865	0.774411	0.890061	1.53196	2.47882	2.57618	1.83878	1.76524	2.08722	1.12961	3.75361	2.55283	3.7673
CCDC150	1.20688	3.50454	2.21028	8.78421	3.55625	10.4278	3.79836	9.24221	4.46985	1.42574	7.03925	5.92613	9.95508
PLCL1	2.17944	4.78781	0.525312	10.9687	18.2078	14.1687	10.4952	13.8426	19.495	0.977657	19.3954	17.4076	15.1834
CDK15	0.305507	0.202329	57.8815	2.72393	1.19301	3.55846	1.56802	2.47739	2.31403	0.624314	2.53629	1.46806	5.83953
FZD7	17.722	47.6528	0.610844	21.4475	11.3209	8.13259	9.22863	5.07565	4.47241	1.10174	7.84673	2.67169	6.08224
ICA1L	0.495759	0.724253	4.99064	1.85725	2.15559	2.36983	1.35027	2.23095	1.98285	1.8095	2.02156	1.38059	2.53467
FZD5	3.70506	3.01499	0.234816	2.84016	1.85802	2.0713	2.16074	1.41118	1.49969	0.688312	2.61779	1.72569	1.94747
PTH2R	0.337993	0.472558	2.57261	0.656018	4.19008	1.77006	1.98491	1.24113	1.6935	0.362792	1.49652	1.71106	1.65237
ERBB4	4.95146	3.41976	2.32244	7.43949	14.6793	12.8312	11.1592	41.8548	25.7007	0.58258	37.1917	32.245	28.9798
SPAG16	2.81776	5.6408	0.209729	10.0681	19.6491	14.1899	13.0076	13.2081	21.0271	4.9492	19.5117	23.9349	37.7848
PLCD4	0.270919	0.205054	125.776	0.86387	0.561362	0.97848	0.495901	0.836921	0.836275	0.44099	1.19955	0.789842	2.15884
FAM134A	126.988	120.134	0.882974	58.4262	50.6901	34.07	45.417	53.9532	51.1382	40.485	63.1321	36.08	50.3628
DOCK10	0.62219	1.43063	0.00873153	3.37354	3.60746	3.49573	2.18339	4.2571	4.79277	0.44417	6.32612	6.06677	6.44934
NYAP2	0.0279291	0.0924834	20.9512	0.213445	0.140225	0.279919	0.262293	0.179475	0.305021	0.0778284	0.173899	0.248535	0.664787
PID1	16.9085	29.0193	2.02576	60.3333	63.9865	60.4075	39.3158	101.084	108.531	19.1536	111.613	79.2327	128.281
FBXO36	2.27989	3.85424	152.735	12.0089	8.30059	13.8466	8.07184	12.925	15.9795	1.09231	19.2263	22.8937	29.5572
ITM2C	95.7283	149.033	2.46533	91.2989	89.4438	46.8029	62.5371	56.22	58.6116	18.8528	69.3723	58.1451	70.6128
C2H2orf72	1.77569	1.38896	35.6495	1.09907	0.935991	0.51508	0.855033	0.667445	0.197031	0.0207799	1.2304	0.29861	0.201699
TMEM54	41.2823	32.8131	14.7522	15.8511	16.6046	11.6582	16.8938	16.6096	10.3428	12.8863	17.1284	14.53	11.4146
KIAA1522	10.8221	12.4792	19.4993	7.49324	6.54069	5.2254	4.43391	8.05038	3.42855	4.06122	9.80554	4.71817	7.06125
ZBTB8OS	25.6701	29.2224	23.0301	72.502	59.1787	73.691	58.4015	61.3694	55.3424	41.8184	56.187	56.3296	72.0886
HSPB11	39.7791	50.6158	40.8681	117.287	119.792	150.455	90.419	112.258	101.473	27.1651	159.464	101.738	160.598
TXLNA	31.0136	44.314	77.2415	27.3323	19.4352	19.8961	18.8755	23.963	16.899	17.6977	25.5541	13.5232	21.8852
PEF1	84.3213	71.0078	7.09696	41.5141	50.7111	29.3773	45.696	46.4449	35.1162	24.7327	47.6361	31.0392	41.5853
SDC3	2.83758	7.80817	22.4064	2.06532	2.25185	1.47232	0.90779	1.9323	0.957436	0.51973	1.45989	0.654393	1.90259
KDF1	18.7803	20.788	38.2803	12.848	9.81044	10.2103	9.76871	10.2753	10.0062	7.32305	14.0486	6.23606	8.13722
SEPN1	24.426	44.9555	268.291	23.542	14.7472	12.1444	9.13792	13.4058	13.7962	2.79585	19.2643	10.237	19.5791
DHCR24	300.208	188.162	15.8921	183.369	89.2477	89.7454	97.7147	63.9252	53.8051	7.12657	174.443	101.617	92.6983
HSPG2	10.253	16.5568	9.13961	8.57818	4.50496	5.32081	2.15371	6.46616	7.61215	3.08889	10.1879	2.52132	10.1324
RAP1GAP	6.29696	9.84465	25.4423	5.55997	3.57042	5.0556	2.93995	6.5704	2.76392	2.56211	6.82169	3.17472	6.64167
ASB1	18.3781	25.3077	36.7659	16.3726	10.3134	11.8905	8.10729	12.9085	8.95789	9.2106	15.2876	7.66333	14.2939
AKR7A2	35.0271	40.5258	32.6116	17.3034	18.5986	11.8887	16.4062	22.6422	14.8675	11.1328	23.9407	13.92	23.4384
EMC1	21.0501	42.0146	39.8792	28.1613	14.2628	16.4919	9.72349	18.0882	14.3635	8.00487	18.169	8.05705	16.548
ALDH4A1	34.452	30.6343	0.730264	18.9151	18.5303	13.1619	10.5922	14.9527	12.1213	2.31195	12.1928	10.9115	11.6495
KLHDC7A	0.419725	0.65263	13.0905	0.106259	0.142525	0.0988643	0.0318851	0.134022	0.154297	0	0.1212	0.0259829	0.0526512
LOC105610921	7.53052	10.9295	118.754	3.84841	2.47293	3.06701	2.44955	2.97444	2.1826	2.85751	1.68487	1.787	1.38682
PADI3	107.392	157.928	42.637	125.789	38.2403	85.6382	42.9476	67.9282	47.9571	41.085	51.3894	27.998	65.2249
ATP13A2	36.0929	47.6083	10.8757	19.4845	11.9249	10.841	7.86832	11.065	7.78882	4.86189	12.3007	5.357	11.3116
RSG1	9.05923	13.4393	31.374	8.67441	5.43565	6.23847	4.11544	6.70248	3.74475	1.28655	3.40947	3.72626	3.13649
EPHA2	24.7585	50.3931	35.7342	36.0408	10.6121	20.5667	11.2834	21.3649	13.3162	8.75445	21.4792	9.95848	21.8464
RABL6	46.5453	59.5443	13.9705	34.907	17.9132	21.1943	15.4673	19.9042	13.1598	5.66981	14.8696	7.6338	15.724
PPP1R26	9.07696	12.9477	55.0154	5.51399	3.42773	2.5344	3.11092	2.49983	1.94328	1.28417	3.56492	1.11841	2.14041
COL5A1	17.0008	42.7996	307.634	13.2753	10.1593	8.03609	3.41797	9.62944	12.9108	6.37942	10.6555	4.9694	11.085
LOC101109608	297.876	323.678	3.32366	103.025	119.794	54.4335	102.118	58.1003	79.7072	88.0765	99.8142	65.6613	78.1108
LOC106990978	4.62095	3.48038	12.9938	2.50602	1.81966	1.53805	1.55673	2.25506	1.19171	0.5162	2.55752	1.8491	2.17847
CACFD1	15.2461	18.3934	19.9374	9.47119	6.39248	7.15488	7.21109	6.77521	8.34758	4.04109	9.83553	3.04182	7.42468
SEC16A	14.3821	24.177	10.695	13.7996	6.16322	7.14099	4.2334	9.32074	5.455	5.9421	9.42991	4.72707	9.77246
GPSM1	9.43807	20.3464	13.3043	7.97744	5.28059	4.49835	4.08637	3.8282	4.48536	5.47092	5.92825	4.72891	6.02903
C3H9orf69	13.4853	12.9792	19.3503	9.98503	6.55979	5.96592	6.72617	5.19747	7.03585	2.7393	7.51523	4.05268	6.12556
LAMC3	16.033	21.3736	698.136	10.78	6.29792	7.36174	4.1984	10.3194	7.92527	4.6179	10.215	4.68945	8.42684
TACSTD2	564.34	603.218	21.6256	323.79	310.749	240.368	364.787	228.65	192.36	151.718	228.396	215.024	156.731
ASB6	17.545	26.1301	437.32	15.2752	9.22573	12.5977	11.0007	10.0184	8.57661	7.76652	14.4263	7.70934	14.4716
CRAT	529.611	231.052	18.9439	169.503	195.873	111.105	123.249	157.037	69.7061	41.2932	382.006	92.9498	95.3282
FAM73B	13.5806	27.7426	14.7234	19.2801	8.68522	9.64804	6.38471	15.3205	10.4962	3.47492	16.9699	6.89724	14.5016
C3H9orf114	17.3377	24.0832	113.572	14.4633	8.25868	9.58121	10.4594	9.42512	10.431	3.61779	12.9501	6.29517	13.1147
SPTAN1	58.8382	114.894	66.3053	49.4715	27.1532	32.1072	22.5726	32.3849	22.126	7.42532	43.6672	14.384	35.8829
SLC27A4	73.5729	55.0164	100.329	34.6029	23.5918	20.3127	18.6919	29.9623	17.5372	27.1665	37.4212	25.717	38.1454
GOLGA2	85.7828	96.9426	34.6008	47.087	40.5616	31.5189	30.3962	42.349	38.3912	16.6865	49.0226	21.6921	39.0194
ST6GALNAC6	26.2937	29.7961	213.967	17.6363	13.5905	11.2823	12.0431	10.3406	10.1053	12.3366	14.5163	8.20539	13.2735
FAM129B	158.719	205.631	39.0517	107.173	61.4072	65.499	62.9796	96.0674	53.0223	14.6296	114.687	60.1876	91.1786
OLFML2A	24.1618	49.8493	242.142	22.7826	20.5805	18.455	13.1332	13.8262	18.9126	5.67115	15.6439	11.1642	13.32
LOC101105319	89.1286	208.34	85.4915	84.2719	56.866	42.6507	49.7798	33.4208	39.8052	16.8116	36.1063	22.1685	28.0409
SDC1	45.7846	65.0553	152.368	31.939	26.5122	18.8682	15.035	20.8657	12.9115	3.31338	32.2769	18.2326	18.277
RHOB	65.9585	138.632	2.45205	50.9406	52.1766	25.2776	28.9039	34.2667	69.7859	16.3117	59.512	35.1793	87.502
FAM228B	3.28348	4.22618	2.26798	8.10699	7.30104	10.7234	8.64608	8.60615	8.74728	2.60379	10.2487	9.64744	11.415
KIF3C	0.932076	2.10473	35.7203	1.16065	0.695382	1.27152	0.735794	0.893459	0.743775	0.279556	0.988228	0.727504	0.8991
SLC35F6	27.2845	34.9893	22.0189	19.9587	16.6742	10.6962	12.8564	12.4189	16.3586	5.46785	14.0385	8.45931	14.9002
EMILIN1	16.5585	24.7372	4.70415	9.13622	9.49278	4.03059	4.86638	3.82942	7.82285	8.76072	4.5928	3.63962	4.84346
SPDYA	8.0177	14.0021	157.777	55.7185	47.6381	78.7208	46.4162	33.7434	31.4191	7.019	36.4268	37.6481	33.5499
LOC105610454	135.433	130.635	4.31782	79.3572	105.269	48.2193	63.9986	55.6062	57.4912	40.4575	59.4565	42.7665	57.7741
EHD3	1.42458	6.23644	11.842	2.74157	2.15517	1.41274	1.28673	2.06881	1.66725	0.305024	1.20272	1.20324	1.14945
SNRPG	20.5806	27.929	446.509	63.9617	50.5735	76.4744	52.9461	103.237	48.752	29.3674	102.306	44.7632	67.9394
PCBP1	353.833	436.162	27.6635	217.346	249.684	146.798	216.944	202.718	224.193	128.351	183.561	155.361	157.242
COMMD1	45.815	43.5794	0.170369	110.664	113.844	149.369	123.998	109.866	117.256	71.2615	120.942	131.582	136.396
CTNNA2	0.272475	0.252634	35.3368	0.59496	1.03363	1.07759	1.99953	1.56752	2.30382	1.75143	1.33462	1.84277	2.00465
IL36RN	34.1134	36.1561	8.95273	25.9795	12.1685	20.3108	22.4125	15.2459	4.40992	4.95024	27.5747	12.9258	9.20762
IL1A	8.28955	9.48263	8.08167	22.8177	13.7051	49.5633	26.8609	44.7371	41.5227	11.368	116.992	73.7132	62.2923
EDAR	6.60464	8.04265	2.66087	4.18688	3.32792	3.15488	2.57476	2.04278	2.4519	1.53043	5.7779	3.48848	3.53449
CCDC85A	1.64093	2.74671	30.1543	5.72234	5.59306	5.21665	8.49098	17.6573	11.3332	0.937984	16.3174	18.7422	21.2005
PNPT1	30.4416	50.546	80.8	108.56	97.2977	137.876	109.141	93.5532	100.557	21.1821	116.397	120.358	152.363
LOC106990985	31.4192	65.117	0.524618	23.6755	18.5586	11.2142	16.9211	7.78202	12.0847	0.824038	18.9032	6.52602	12.691
NRXN1	0.633937	0.827329	0.430957	1.47922	3.52609	3.5556	3.4125	3.50318	3.78355	0.720477	4.39605	5.15014	5.4198
C3H2orf61	0.646162	1.0841	2.46007	3.00996	2.03465	3.04943	2.22036	2.21456	2.75194	0.277429	5.48359	3.74137	4.6193
SGIP1	1.97937	4.58407	11.931	7.31829	10.9202	12.0917	7.99894	13.199	21.6643	0.658738	15.4244	16.0968	28.6592
DYNC2LI1	12.6866	19.8096	0.579672	35.2841	36.2501	41.2383	33.9256	28.6586	26.3808	17.2837	46.4963	37.6686	55.723
WDR78	0.927083	1.38584	19.3931	2.08216	3.38387	2.79826	2.52231	3.32324	2.20228	0.639711	3.62838	4.39366	6.22845
LOC105614651	5.38469	11.6969	132.774	5.95722	3.12407	4.43412	1.50533	1.31819	5.15988	0.800277	0.715251	3.37337	4.66072
LOC101106246	70.7023	116.207	155.263	59.4315	49.1005	28.6184	40.064	51.6485	44.3697	18.4007	49.6713	23.6187	41.4714
ATP6V1B1	165.624	232.124	10.9218	146.732	123.535	62.9502	65.1549	106.224	30.4683	5.31854	88.4914	62.0473	55.1019
EXOC6B	15.4352	28.4203	1.56939	88.8968	90.7097	114.04	88.1012	113.108	112.44	7.56243	115.008	116.037	158.569
MTHFD2	1.81972	4.26651	0.473071	6.85074	4.69071	8.70261	5.99351	9.60073	9.16677	2.93763	8.54335	8.72577	12.3108
M1AP	0.481468	0.364415	0.178399	1.35168	1.3046	1.56503	1.38204	1.38913	1.21157	0.79223	1.42754	1.95862	1.88523
LRRC7	0.142659	0.680251	70.3432	1.07987	1.55985	1.08201	1.03027	3.04998	5.56195	0.791547	3.6004	2.22077	3.85529
LYG2	60.7505	62.6939	22.656	45.6595	32.7735	17.8474	29.1158	15.1987	5.55718	13.3523	16.1008	14.0802	11.8445
SEMA4C	21.126	29.0564	48.5159	17.5199	11.9044	10.0116	7.90441	11.2054	8.72068	5.4708	15.9442	7.77808	12.0673
TMEM127	27.3771	45.9958	81.2103	18.0386	14.0669	9.09418	8.906	10.9349	11.2693	4.65772	17.106	6.71887	14.6023
PROM2	77.2643	86.4443	102.212	49.2862	28.5433	35.0072	19.5735	59.7646	42.4383	21.7316	38.2186	22.3464	26.7365
MALL	86.5426	77.4372	91.0576	54.6242	43.105	37.4833	42.7485	35.6233	36.763	22.6418	38.3089	18.7544	24.9937
ATXN7L3B	71.6005	78.8402	2.63335	51.7352	46.5456	30.7612	38.1282	48.2808	54.0687	8.96234	56.5031	35.8266	42.6077
NAV3	2.13332	6.16787	2.59472	12.5821	11.2714	11.8407	6.58108	12.4103	21.2765	2.15802	14.3056	12.6723	25.6524
SYT1	4.60457	9.9767	1.48282	15.8882	22.1037	35.1701	13.9799	23.4837	26.2754	3.18934	33.8849	22.2176	55.3131
LIN7A	1.17544	1.1199	1.09759	3.36213	4.33706	5.65302	3.49503	4.31629	3.90859	0.804519	6.5741	3.52338	3.56985
PPFIA2	0.846633	1.37861	0.139102	4.27396	4.08176	5.75649	4.47852	3.1279	2.44087	0.721488	4.77176	3.11866	3.59679
LOC101104054	0.111235	0.0589342	0.244871	0.194308	0.794287	0.843668	0.563625	1.30707	1.56751	0.132254	3.95241	3.13586	1.4121
MGAT4C	0.304599	0.345819	0.181965	0.807626	1.57787	1.46159	0.836324	2.18375	3.67919	0.687131	1.734	8.89064	15.4892
LOC101120030	0.657962	0.536308	45.5838	1.99847	2.14584	1.98106	1.84049	2.69485	3.69987	0.122234	2.68915	2.35103	4.07046
MRPL42	57.1026	64.6353	11.4563	116.716	150.134	165.229	199.03	130.434	140.121	73.8349	106.648	190.858	144.077
CRADD	19.6111	20.3931	11.8962	77.5302	61.7942	79.636	56.8754	88.1296	64.9909	7.53246	83.6893	70.9715	69.7971
RABGGTB	18.6784	31.7023	146.435	86.1862	53.3601	79.3999	58.9339	72.6291	72.476	40.93	84.0245	79.4123	98.5068
HOXC13	112.808	144.312	78.7502	81.1425	62.1701	61.532	59.0788	59.2734	42.4936	46.7997	34.5716	36.3463	41.0189
CALCOCO1	49.4834	68.1699	0.606361	40.7899	32.6658	35.1056	22.2324	39.1292	29.9403	22.0774	55.7523	21.6117	43.7369
NPFF	1.63648	2.569	1.72205	9.17594	2.87405	6.37019	3.12408	11.3137	4.56954	9.03051	11.3719	5.3073	6.86371
ST6GALNAC3	2.19531	5.15471	598.675	10.7492	12.7589	8.06575	8.80473	13.3378	15.9743	3.1737	14.05	17.1345	19.894
KRT79	663.753	1145.96	576.801	201.739	235.492	149.336	197.648	230.256	85.864	4.77986	405.89	185.664	209.16
KRT72	629.228	461.859	157.366	152.285	129.569	102.317	156.442	68.1791	96.2165	185.947	56.4571	45.6945	41.5757
KRT74	138.028	159.398	4335.37	104.828	62.6299	60.1966	55.3206	88.1919	101.642	41.2847	93.2035	38.2648	61.1771
KRT71	4764.18	4364.39	3966.37	1500.91	1443.86	935.907	1750.78	958.729	1324.24	303.292	514.793	811.611	589.244
KRT5	4033.59	7214.34	803.655	1600.59	1972.14	712.539	1377.84	1804.2	1406.63	1273.54	1518.14	1023.84	929.091
LOC101112304	727.914	721.823	108.866	426.156	467.527	161.636	263.332	334.031	436.742	140.097	282.54	292.157	202.128
KRT82	79.3102	80.7762	57.4577	26.861	24.4392	17.6823	18.143	20.7482	14.2769	26.9027	16.9616	8.39125	15.5869
KRT84	55.7058	46.395	444.037	21.6036	17.4607	8.55449	10.3998	30.9286	14.248	9.9176	9.25512	7.26045	14.7885
LOC101113055	245.98	220.895	3.60485	55.4856	65.5941	33.3932	33.8862	58.2894	62.1468	30.3696	33.4239	8.61214	45.9371
NR4A1	1.55321	2.82443	0.444386	1.49456	1.13083	1.69718	0.586463	5.70348	30.0122	5.0863	27.3847	26.2566	19.4822
AK5	0.710717	1.46436	146.174	1.63809	2.33484	3.55088	2.39735	2.51313	3.81141	1.49639	3.47463	5.14394	3.84476
LOC101119713	109.684	108.8	24.1078	44.1478	43.7518	24.9088	30.1253	34.6325	38.5635	40.1783	40.7396	34.746	39.7325
CACNB3	22.9759	31.7061	0.673641	19.8809	11.0846	10.9248	8.89465	16.3548	11.3947	11.2114	18.2148	8.24851	16.6791
CCDC184	2.61647	0.496911	50.551	0.266054	0.321977	0.0938042	0.394972	0.129517	0.135556	0.114371	0.143746	0.287618	0.0277536
PFKM	36.0422	47.6	58.5386	26.9844	21.7165	21.5231	22.5802	21.2459	16.0891	16.3735	23.5038	14.8163	19.3876
SLC48A1	46.4755	49.7064	9.25629	30.9369	25.5837	27.0266	24.4295	21.3582	19.2302	17.4135	35.6584	21.8981	29.5288
CPNE8	8.4398	12.9516	2.46693	41.3501	38.7174	47.0104	33.9667	66.8639	54.4244	3.2779	74.4201	56.7971	80.6357
GRIP1	2.02603	3.35445	0	9.76622	8.28845	11.1301	7.25844	9.14732	12.2467	0.990493	10.8444	7.1484	14.87
HMGA2	1.5318	1.1067	0.669894	6.68951	4.50574	12.0707	9.85411	17.5564	22.1748	2.27658	40.4629	12.6894	134.594
FAM19A2	0.792819	1.22041	125.534	2.99442	4.51847	3.32002	2.84536	6.21596	6.19008	1.22606	9.92623	7.47461	5.53308
CTDSP2	62.5314	138.238	14.8587	73.4099	48.5448	61.9675	46.8442	54.3396	35.4434	19.7703	63.5337	31.8519	56.8408
NXPH4	11.2612	10.864	31.6445	6.00211	8.16192	3.02639	3.79576	4.44993	1.62441	2.3721	5.44742	1.89375	4.60495
LRP1	18.4023	48.5733	43.5806	15.4947	7.73596	9.21302	4.69014	10.2232	12.1072	10.2751	14.3905	4.31745	14.8052
STAT6	34.2365	42.7166	79.3024	22.066	18.6976	15.2687	12.3342	27.6926	14.6917	15.2271	34.0233	12.4333	28.8103
NAB2	87.6078	94.3109	41.3053	50.6341	44.4275	33.1882	43.9259	33.1709	24.6913	15.8559	34.0059	19.8839	34.3759
NACA	53.4512	77.6421	103.14	160.452	129.911	194.205	114.51	253.946	150.039	64.859	188.529	169.724	196.63
CS	66.681	100.859	9.50689	67.8352	47.878	48.2973	36.8928	53.0731	44.7903	35.1672	60.8088	31.05	59.1981
ANKRD52	5.10221	15.5662	40.9405	6.70928	3.09301	4.77276	2.03554	4.6839	2.876	1.1248	5.13945	1.86457	4.63704
DNAJC14	30.6259	41.3748	61.4664	26.9169	21.1956	18.389	17.664	18.9357	18.5032	14.4153	24.8745	12.1568	18.8409
SARNP	138.854	140.264	5.79732	286.571	322.408	392.814	378.34	333.028	331.617	351.715	284.013	371.263	396.693
ANKS1B	7.38142	11.5655	17.5555	35.9043	37.9643	49.1575	34.6413	48.4253	24.7995	6.8899	50.4438	44.7303	38.373
NUP37	26.3221	34.6066	1.62437	64.4292	70.3751	87.832	84.7853	60.619	82.841	17.8576	75.674	85.2962	82.6945
CHST11	2.44407	6.02181	382.889	17.2417	11.4035	14.9076	8.74979	25.5017	16.6428	2.07022	15.5513	15.0146	17.3331
SYN3	260.412	332.365	76.3971	237.949	180.534	146.387	150.816	175.806	203.314	83.631	193.425	87.4681	215.664
ATG4B	62.9315	80.6356	124.981	66.5114	28.2098	42.8312	25.7511	43.725	27.4307	28.7073	41.4836	20.6493	43.6331
MYH9	79.2195	136.38	2.93654	65.1348	39.1616	36.4976	27.4252	42.9839	42.9048	9.79311	49.7741	21.0259	47.328
PDE3A	5.59105	10.2197	419.626	27.0752	61.4866	50.8262	30.2021	28.8569	45.5398	2.16046	45.488	37.5738	59.7658
MGP	391.39	297.07	86.8938	749.992	1239.32	715.957	777.05	1008.31	2403.07	1657.46	1677.67	1248.69	2031.06
WBP11	68.6074	82.0964	4.82605	48.8897	46.2904	34.6886	39.454	40.4899	46.2029	19.3805	51.3455	31.8665	44.8791
GUCY2C	4.06595	8.12395	0.206986	25.2802	13.7056	18.5367	12.3571	20.2446	15.3683	2.9062	18.7942	12.167	25.5
GRIN2B	0.165519	0.422815	489.869	2.03082	2.12375	2.34425	0.908917	6.06348	7.66387	0.474421	3.31753	2.03683	3.18936
LOC101122777	576.079	515.939	6.42729	281.798	290.609	216.526	280.096	281.71	281.921	142.595	373.283	234.193	276.926
CLEC1A	5.13966	8.32054	1.88936	18.9538	16.7573	23.513	18.2597	28.8689	36.8577	12.0945	31.4802	21.4658	55.3609
LOC101120999	1.29501	1.14354	0.812967	11.1223	7.17623	11.6462	10.4461	11.4129	8.8813	2.24544	17.2734	18.9916	14.0735
LOC101102973	0.306991	0.765409	53.5772	3.18077	1.97451	2.97409	2.27175	3.62501	2.64655	1.34192	4.88734	4.13955	2.73532
ATN1	45.0297	68.2883	16.6144	40.0915	29.0727	26.1413	16.742	26.9922	28.6697	16.0432	38.761	17.8573	35.2189
LOC105614924	16.6484	14.2303	58.8493	8.11811	7.41171	3.99873	5.9467	6.72572	6.35638	3.16905	8.17025	5.02106	8.28164
USP5	48.5807	60.0344	42.8129	22.1428	15.5395	13.3397	12.2713	18.1533	15.8422	17.8383	23.007	9.61063	14.949
COPS7A	41.9813	47.8766	0.959088	22.3957	21.7822	11.3047	15.4798	18.4851	20.5838	14.1659	23.3133	11.2799	17.8063
LPAR5	0.435294	1.26295	120.508	0.331914	0.416287	0.381808	0.217303	0.456692	0.408942	0.215646	0.309751	0.265617	0.209316
CHD4	119.399	135.753	1.68838	80.1222	61.8163	64.6284	43.8057	62.8649	56.2415	48.1724	70.8075	32.6912	66.9349
LRRC8C	0.680936	1.71056	5.10697	3.70858	4.09996	3.61268	1.9231	4.69909	8.19771	1.90625	6.8909	4.44642	9.67913
FOXM1	3.37361	5.74522	38.9947	4.65247	2.12257	2.63844	1.66198	1.61449	1.28682	1.16865	1.60042	1.55297	1.24413
B4GALNT3	36.9112	44.0601	13.0822	23.4054	10.9217	14.8296	11.6473	10.807	8.3432	17.2692	10.3452	6.51673	8.96688
TUBA8	15.0191	10.2917	27.7698	4.10726	5.37588	3.5745	4.43687	4.25057	1.71276	2.12894	4.90101	3.33744	5.32267
GGA1	31.8465	29.6643	248.23	17.8168	14.0207	12.3102	10.1963	16.4351	13.1237	13.3549	18.75	8.30883	15.7442
LOC101102223	183.429	201.624	32.4162	83.9125	76.0574	57.3801	81.325	50.4279	64.6614	24.8798	45.4794	32.0466	50.5258
MAFF	13.3021	26.203	47.359	8.10961	4.37633	5.72823	4.71791	5.42733	12.0162	1.09832	11.8928	5.98944	13.695
JOSD1	24.0852	45.5864	180.268	32.2877	18.0831	19.9747	16.5848	20.2729	18.7902	7.65335	25.356	20.594	23.2875
SUN2	135.086	167.524	21.8229	74.8735	46.4301	53.7215	36.9804	64.665	39.3451	22.0163	67.3582	29.2202	46.1561
DNAL4	20.3335	23.9401	6.69723	14.0625	9.73524	13.3371	11.8425	9.34513	10.6491	3.53143	9.18412	5.43523	8.2042
CBX6	6.49686	7.15178	23.0725	2.55606	3.33049	2.616	2.14759	1.23583	3.2786	0.424068	3.13414	1.93756	2.59638
TAB1	23.1612	27.309	1.1259	15.3846	13.97	11.1212	10.3753	11.3575	11.0563	9.51742	14.5736	8.00836	10.5689
MGAT3	0.618981	0.462108	8.24889	0.180209	0.313915	0.182911	0.275292	0.0964274	0.0158593	0.0501783	0.112118	0.256381	0.113646
LOC101102895	8.2454	10.0908	13.5549	5.64637	2.77284	3.14577	2.82046	3.98015	3.17487	0.828466	3.85648	2.61253	2.1444
ZC3H7B	10.1866	16.6365	240.098	10.7543	6.85236	8.17615	4.82975	8.63115	5.89525	3.2851	10.493	4.85804	8.2606
TEF	194.556	248.996	73.0652	120.917	117.063	91.3508	87.129	107.515	85.3789	76.3224	141.824	80.9465	128.808
TOB2	63.3978	78.6711	80.8366	37.4881	28.6958	25.1926	23.9989	27.2346	26.2778	21.6283	33.9804	18.5472	36.4047
CSDC2	44.3919	56.8447	51.4048	15.2214	14.2432	10.8663	6.7438	10.548	12.4451	9.47048	8.41458	6.15004	8.7298
DESI1	38.5073	43.915	136.626	28.7	22.3195	23.7404	20.1171	25.4286	12.3451	12.4904	30.4978	20.2311	25.5252
SREBF2	130.174	161.354	20.5687	86.3633	53.9809	62.3717	43.808	61.4384	48.1267	37.4802	78.212	42.8765	87.4982
LDOC1L	10.6469	19.1029	0.648026	9.93587	7.15309	7.12116	5.79196	9.35486	8.75883	4.57599	11.1419	6.98139	10.6766
LOC101110050	0.628123	0.603183	39.4547	0.262877	0.148923	0.161637	0.226355	0.422859	0.165965	0.215877	0.417169	0.268297	0.328469
TTC38	29.6719	45.0133	11.223	22.4356	15.8145	13.415	15.8888	24.6655	13.7774	3.87053	28.0005	21.7618	17.9224
LOC105614885	4.18048	13.9193	23.5205	5.86217	1.15537	2.70113	1.87633	3.56781	1.83759	0.171002	3.88452	2.2935	0.829913
LOC101111090	12.6882	26.6733	15.363	19.5049	7.03467	11.9456	6.5204	13.5817	5.78977	2.56714	13.9386	6.0421	11.3002
ZBED4	5.94446	17.2472	16.6271	12.0734	4.48475	5.61277	4.00617	6.8257	3.74966	1.11486	6.01604	2.90186	6.90115
PANX2	17.738	18.7958	31.4411	13.7568	8.18239	8.01074	7.91741	9.66989	5.75545	6.97828	12.0777	5.90002	6.96698
TRABD	36.6283	36.1766	0	15.7185	12.8743	10.5527	11.098	10.6253	14.2467	10.2267	16.5225	9.11899	8.62842
LOC105614180	0.090607	0.240026	0.449432	1.58275	1.41529	1.27626	1.9789	2.10719	2.04292	1.48127	1.95575	3.48318	1.82992
LRRD1	0.546278	0.72357	0.153031	1.90433	2.1172	2.36759	1.8964	1.91798	2.0866	0.427307	2.21984	2.66087	2.3849
HEPACAM2	0.0407909	0	5.78064	0.534412	0.864718	0.486171	0.819621	1.79744	0.74727	0.242495	0.338643	0.871175	1.41227
PEG10	0.998053	5.74012	0.845498	0.802895	1.69963	0.341495	0.344178	0.610817	0.851272	0	0.697747	0.486143	0.454666
PPP1R9A	0.618706	1.09831	0.631481	2.03342	2.71141	2.41197	2.02832	1.95182	2.8763	0.455024	3.54785	2.47928	3.80018
DYNC1I1	0.763615	1.41928	15.1966	2.63554	2.17119	3.25616	1.66777	3.30153	4.98122	0.732189	4.66257	3.41954	5.57897
SDHAF3	21.769	22.5808	1.64014	63.6323	69.2554	93.0214	70.4955	62.7081	74.7821	41.8383	62.5638	48.0481	54.105
THSD7A	2.00088	2.93306	2.60558	6.88207	7.74546	7.14507	6.47509	10.7224	15.7401	0.893026	9.58179	9.99709	11.0706
DGKB	4.14546	3.99596	0.152481	9.66786	18.9609	16.5086	8.30491	22.8468	39.9135	1.33865	46.1272	34.8268	44.2095
TMEM196	0.231673	0.452217	14.5653	1.29573	0.884287	1.10977	1.54459	0.611919	1.73546	0.434924	1.51842	1.14582	2.21633
RWDD3	14.2279	16.0741	0.0450017	40.103	28.6362	43.6788	32.4757	37.6048	38.1831	41.151	40.3572	58.7375	38.1824
GRM3	0.0449826	0.0714979	2.12853	0.61552	0.220828	0.350922	0.589465	0.23125	0.139456	0.18719	0.164314	0.448326	0.272544
SEMA3A	1.84468	2.63223	1.8136	6.31758	13.5918	8.91223	9.74716	15.391	15.0948	0.741685	14.1455	18.7279	16.3524
LOC101102230	0.801463	0.606614	2.41045	6.38898	2.64006	7.60878	3.23413	3.69045	12.6387	6.3244	12.1667	4.29281	11.8921
MAGI2	4.86723	11.494	0.0260645	24.5815	35.456	29.8036	18.9654	42.0856	49.0504	5.46954	46.0544	65.1461	69.3766
LAMB4	0.114635	0.110429	2.90188	0.364088	0.26743	0.429084	0.309547	0.72709	1.18955	0.441418	0.813264	1.0535	1.48834
LSMEM1	5.00744	9.76014	6.36949	58.4329	17.9418	35.4209	20.5926	37.124	19.6778	22.1751	39.7462	16.6937	77.6397
ELMO1	4.79252	14.6888	1.25977	22.8113	24.8828	30.5164	18.1202	41.2266	52.3481	2.51778	54.1289	42.1001	77.0466
BMPER	1.45512	3.36056	2.9323	7.11502	6.72997	7.49242	4.32433	11.0519	10.2002	1.50644	7.00038	11.3153	8.16333
PDE1C	2.6754	6.2254	0	14.3151	10.8221	14.953	8.44669	30.1301	14.9787	1.89599	24.3891	30.7829	19.7743
LOC101123549	0	0	5.71769	0.441653	0.112836	0.876624	1.41362	0.185682	0.57006	1.76607	2.2669	1.9439	0.437676
CHN2	6.3723	15.3787	5.2763	43.0265	27.2942	35.556	21.7646	48.2531	40.9165	4.64165	36.1349	36.7274	44.1193
JAZF1	3.61743	7.54289	0.134878	11.6904	13.4078	14.9068	11.6291	19.5013	14.682	3.20267	22.6284	15.5621	23.9918
ZNF804B	0.175268	0.142861	3.9266	0.628027	1.80508	0.394417	0.73025	0.462066	0.455974	0.711323	0.514866	0.537486	0.972456
STEAP1	4.69268	5.48441	11.7989	11.7535	10.587	16.4501	11.2136	31.3382	23.7772	5.89738	12.3177	16.9493	13.2903
CFAP69	8.86971	13.3865	80.7081	24.6914	30.201	32.8133	35.3787	34.9274	35.4557	9.6766	38.6073	40.905	31.8099
IGFBP3	55.3704	89.9443	14.322	42.7516	50.1898	13.5822	20.8384	27.0922	38.9634	9.36831	32.1122	13.6664	21.9067
ZMIZ2	14.2934	16.4971	0.428643	8.14969	6.64738	5.84885	3.95503	6.85266	5.66865	5.3159	8.30869	4.48747	7.95666
HECW1	0.52558	0.63562	8.14545	2.0624	1.46601	2.03029	1.44734	2.48937	3.67102	0.56037	4.28743	2.79808	2.96685
SUGCT	13.7626	19.6903	0.927941	44.4269	73.4359	95.9601	76.9582	99.6597	132.354	10.11	80.8514	114.505	132.081
LOC101107188	1.62743	2.66937	0.3437	4.68897	2.95414	6.37724	3.28549	5.67668	5.94135	1.65424	4.32624	3.52974	4.74406
GRM8	0.488611	0.957298	9.74311	2.20789	1.6809	2.73531	2.98802	3.40151	3.55749	0.81695	3.88738	3.14508	3.30405
GCC1	6.60737	7.96775	15.8027	3.8874	4.05461	3.38569	2.65767	3.82474	3.80202	3.09942	4.13689	2.62629	3.21695
TSPAN33	28.0532	20.6336	14.5504	10.4444	12.765	8.71956	8.15984	5.41964	9.06328	7.20499	6.86878	6.12018	7.18
SMO	9.11356	20.0421	1.43704	12.2791	7.00521	6.63334	5.68264	7.34452	5.49004	2.83042	6.06434	3.16969	6.97498
AGBL3	1.74914	2.07436	0.0268883	3.50844	3.90312	4.76006	4.17557	6.43538	6.33416	0.634783	7.71649	8.61516	10.8413
CHRM2	0.107508	0.299038	0.269028	0.406895	0.431817	0.48924	0.826502	0.960617	2.07554	0.822862	1.03532	1.9746	1.47335
DGKI	0.114289	0.373999	0.948004	0.724195	0.427549	0.772135	0.763518	1.35777	0.7958	0.144878	0.993464	1.1295	1.40625
SVOPL	1.21293	0.981801	1.24491	3.13894	3.32686	3.44984	2.26645	2.3507	3.37103	0.888816	4.72714	4.36542	4.59312
TMEM178B	2.65469	3.91916	80.8499	15.4174	10.8295	15.9699	11.7892	15.0623	10.5605	1.68503	10.9277	10.7487	12.1271
EPHB6	96.1592	78.1911	194.029	37.6209	32.7301	21.3592	25.0513	39.3986	20.8195	28.7597	33.3319	25.7638	25.3359
TRPV6	262.506	273.677	7.44268	45.3062	66.6984	31.7574	24.6971	115.323	191.896	28.7528	126.522	59.3605	56.4107
TPK1	9.20751	17.9459	24.6289	35.6232	30.5067	45.7854	35.3562	64.407	45.5857	7.28441	48.1891	59.5171	50.9588
LOC105615174	35.9701	39.8793	23.5127	25.0766	16.9825	16.4086	13.0279	10.5113	14.8552	5.63632	15.454	7.79747	14.6879
ABCB8	17.6515	26.8599	85.9529	12.1364	5.83801	7.19855	5.21609	10.6567	6.24153	2.85571	11.7521	5.03882	8.64453
INSIG1	73.8359	74.2585	33.2439	52.5294	37.3667	41.6525	36.5493	49.5681	20.9621	14.3315	48.5716	28.1367	57.7331
CELSR2	25.3553	32.472	7.2739	23.7012	10.438	14.9363	8.10901	13.9897	8.67253	8.92454	14.6258	7.47055	11.7398
LPAR2	6.13499	5.48126	42.3967	2.31692	2.48614	1.4737	2.52813	3.18793	2.07979	0.860177	5.18931	3.04902	1.50287
UPF1	19.7222	53.2776	104.558	26.3127	12.7602	19.0673	9.83667	20.3697	11.2517	3.34159	24.1923	9.02408	20.6869
PIK3R2	80.3449	102.255	5.25159	58.4787	45.9532	33.7226	29.1043	39.8093	41.0285	30.3649	49.285	29.3499	35.1811
AMIGO1	3.3422	4.44336	7.7958	2.40548	1.88528	1.53468	1.91036	2.60055	1.0155	0.969437	1.89791	0.796056	0.932021
LOC105615198	2.88439	5.54589	12.5313	1.89622	0.934312	1.3106	0.325143	0.79722	1.57342	0.414852	2.31735	0.264955	1.34225
BST-2B	9.19558	18.1138	14.678	5.49166	8.94438	2.93796	4.01671	2.74174	5.81464	4.11749	1.95746	1.84641	6.1225
ANO8	12.1824	23.5743	2.82185	8.26389	5.25544	6.20091	3.77993	7.09893	4.38914	2.56534	8.0757	1.85688	4.80302
LOC105613870	0.77052	3.93655	46.9594	0.320468	0.921094	0.298166	0.360611	0.875763	0.814358	0.347636	0.639678	0.35263	0.516073
EPHX3	38.6555	43.9766	27.7676	22.5901	18.401	16.791	17.9628	21.856	14.0605	10.8242	23.6104	14.8226	15.9236
STRIP1	20.5318	25.2595	40.8156	12.8934	9.72504	7.72711	7.1994	10.9707	8.38718	9.64376	12.689	6.26786	10.8975
PRKACA	24.7759	41.0617	16.1259	22.2358	18.7334	12.3798	11.7347	17.0428	15.2352	3.28661	23.4586	8.62953	20.0861
CC2D1A	13.2877	20.6713	104.15	12.5403	7.82064	8.23257	5.39126	11.1122	6.00705	4.71838	12.7934	5.58684	7.59026
IER2	93.7417	98.3896	8.58774	51.6113	43.3203	28.862	33.5686	38.0578	40.3276	30.9446	49.3139	25.1082	30.6165
NACC1	5.79973	11.1491	3.00796	4.21384	2.9434	2.02425	2.03567	1.64596	1.73584	0.656005	2.18161	1.21308	1.93987
SLC16A4	4.00319	11.0144	46.7878	21.659	15.8147	25.7643	18.1017	20.8407	15.568	4.20045	22.9358	17.3194	25.4048
ARL4C	27.8125	35.5232	43.4068	21.6892	12.9296	6.21836	16.7768	5.40365	6.22114	3.77265	10.8118	6.59993	10.8265
S1PR5	27.3341	33.6622	64.5381	20.6673	11.2181	8.32117	11.5646	9.3384	6.62157	3.11627	11.9125	6.11473	6.6327
CAMSAP3	62.9446	74.2751	40.6617	39.5844	25.0261	26.9636	17.4274	26.9626	17.8839	26.8763	27.7986	14.8795	23.92
MAP2K7	36.0953	57.6221	97.5257	30.6143	20.4136	18.8545	17.895	22.1515	19.5474	4.58127	31.5344	13.5914	24.8877
RAB11B	81.565	120.672	36.684	66.426	49.4048	36.8666	34.1699	54.7839	47.612	19.5539	71.5424	35.3152	69.7271
GPR108	29.636	37.9076	42.3025	26.4218	17.2261	15.9943	13.3236	20.3269	18.7853	10.0179	23.697	11.1522	23.3047
ZBTB7A	42.396	42.2306	1059.86	32.5533	20.9278	22.8036	15.2717	20.6285	17.241	2.06218	26.0991	16.1797	22.1496
EEF2	787.397	946.909	40.8194	355.755	376.041	189.746	320.627	283.57	364.608	279.88	349.49	200.317	228.44
DAPK3	31.8826	47.7336	25.0576	22.5659	14.3983	14.2423	11.1692	18.3388	14.6384	6.59104	19.3705	9.21545	22.478
CACTIN	17.8086	30.4668	7.62858	15.9478	11.2179	9.99474	9.17729	12.3067	8.1536	4.63441	13.6624	6.95515	13.7517
TBXA2R	5.17721	7.07009	6.14516	4.7906	3.80612	3.26138	2.31405	1.17898	2.48845	0.8947	1.73256	1.37141	2.08425
FZR1	4.6379	6.93093	42.939	3.22622	2.43326	2.13284	2.04753	2.46142	1.90583	1.52591	2.9627	1.96592	2.90095
GNA11	45.8292	59.3359	334.59	30.7277	30.0935	23.4813	19.4654	26.0096	31.2665	4.98463	33.257	20.6375	29.9773
AES	398.032	340.705	35.0796	201.918	229.072	151.923	174.106	159.895	185.48	165.545	213.94	123.131	184.506
LMNB2	17.7267	37.6951	18.428	12.3367	8.34067	6.65631	9.89317	5.43577	5.0065	5.06011	4.91575	2.16036	5.17852
SPPL2B	16.6536	27.5614	129.629	15.6104	8.59713	11.0421	7.32099	12.3002	6.45501	6.80779	10.3177	5.86469	15.521
MKNK2	96.9348	126.496	0.172943	69.5373	38.6201	40.4512	33.0325	50.5094	32.4671	8.43749	55.2765	25.8977	49.8281
LOC101123039	0.165955	0.751035	0.37473	0.724739	1.00295	1.43851	1.01487	3.09776	2.88431	0.39052	3.90361	1.4768	4.42898
MEIKIN	0.435865	0.613406	2.50783	1.58621	1.64128	2.47939	1.54692	2.20071	1.45877	0.42511	4.34221	2.67628	3.30106
CHSY3	1.80751	5.01544	0.331594	13.5016	19.4161	13.6234	11.7566	24.5951	28.6878	1.90201	21.49	29.1167	31.4612
LOC105608687	0.795488	1.6683	5.13163	7.47866	4.91849	9.80434	4.57511	12.2523	5.37144	1.35468	8.14502	8.49466	6.74192
SNX24	4.59236	7.88956	238.277	14.1809	12.2261	16.615	11.162	17.3921	14.8973	3.86875	17.0243	15.0518	22.3344
HNRNPAB	174.352	242.766	13.8047	133.319	128.428	83.0095	118.421	88.2853	115.886	49.7012	95.4665	65.7402	87.4941
ZNF354A	14.3283	26.3789	185.87	65.8523	43.7867	67.3964	39.9338	63.7548	45.621	12.2713	61.6082	49.4942	65.6494
PTBP1	148.819	235.186	20.6677	130.858	96.5447	82.7585	87.311	99.0211	88.5321	89.6296	108.629	55.8733	110.214
MED16	12.2977	24.5703	10.0852	13.9867	7.95039	9.14047	6.42601	11.5356	7.67695	3.45041	10.7247	5.46558	11.407
ARID3A	8.05317	10.544	115.565	7.60726	4.43439	5.72506	4.35284	5.31865	4.8823	3.00509	5.96419	2.96965	4.5801
TMEM259	123.464	113.399	160.699	63.5681	62.5856	42.257	46.8715	60.6894	50.1342	52.1092	66.9414	44.6206	51.115
CNN2	151.008	187.252	68.3253	88.4893	73.6931	51.1907	69.1242	50.1142	59.6776	40.4885	44.3686	38.7143	39.1498
MIDN	63.7155	90.3623	5.04989	59.1775	36.0472	34.681	23.5598	36.482	32.9707	14.2364	75.257	26.1843	61.5336
EFNA2	4.51944	5.23793	22.0916	3.80725	3.03481	1.99502	2.44939	2.35617	2.29983	2.11456	3.23089	1.63849	2.5958
REEP6	12.1661	21.4124	10.0959	8.85503	5.85727	2.79893	5.67824	6.32379	5.28422	0.123845	9.9618	4.27121	5.89027
ADAMTSL5	5.50304	14.2725	20.6145	7.77089	6.10312	4.99859	3.28181	3.38808	5.52591	1.19986	6.12791	2.58047	4.70612
LOC105615362	11.2944	19.8013	21.2859	8.93887	3.83344	4.99008	4.43854	3.93708	3.03897	1.9013	7.64684	2.28985	5.06193
KLF16	23.3747	22.8133	0.28771	10.1037	8.66595	6.96337	7.78004	7.30449	8.8753	7.31363	11.0976	6.69282	10.0392
FSTL4	0.639086	0.761849	0.98245	0.930313	1.09809	3.65617	1.37346	2.89434	4.3769	0.436915	2.12225	4.04011	4.72031
SPOCK1	0.617279	0.743285	65.9597	4.20693	2.56702	5.12262	3.542	3.36568	2.49098	0.625504	1.97996	1.99747	2.55001
HNRNPA0	52.2379	63.4636	0.574365	30.4997	33.3888	16.4983	27.8995	21.8187	28.5527	13.397	22.4169	15.4361	22.4931
PKD2L2	0.435124	1.50489	2.42853	3.97639	2.69711	4.05981	2.49198	2.9293	2.4527	1.04188	2.56879	2.16836	3.87084
GFRA3	2.47164	2.58201	12.5551	1.7026	1.46091	0.908622	0.758314	0.801351	0.839655	0.776218	1.08703	0.565574	0.880775
LOC105615270	6.51474	10.7568	1.17162	5.0665	2.83776	2.56244	2.88468	3.55014	3.01825	0.364743	3.2599	1.65184	2.70355
LOC101123120	0.3123	0.7521	1.03565	0.371955	0.332602	0.199952	0.148817	0.312758	0.260053	0.179328	0.329978	0.26275	0.163825
LOC105608322	0.304476	1.08082	68.0013	0.336849	0.285357	0.171549	0.223436	0.283239	0.343252	0.153855	0.283105	0.225427	0.158124
LOC101105495	49.3278	75.656	10.8695	38.1446	40.3017	32.2945	23.7927	38.1915	46.5807	18.3472	40.8865	28.6878	40.0979
FCHSD1	7.42994	13.3158	30.4505	7.74024	3.5279	5.03919	3.35695	7.3241	2.85733	1.75962	6.47432	2.84658	5.58416
PCDH1	27.0845	28.3352	10.3733	17.1053	10.3787	10.4179	7.39276	14.0001	8.19759	4.03727	16.9734	6.74313	11.1376
SPRY4	6.93282	9.87958	4.96939	6.95055	4.83069	4.22355	3.45252	4.12738	4.71377	2.81645	4.27748	2.74621	6.26533
ARHGAP26	4.92172	11.5604	1.66792	21.3237	17.7429	20.9675	16.0395	29.8804	26.859	3.27807	25.5812	21.9363	48.6902
SLC22A15	3.649	5.3166	0.190449	9.46971	8.49354	12.5429	5.58421	17.8658	21.9162	1.6176	18.3851	12.8812	22.0725
KCTD16	0.249209	0.623502	2.77598	1.06816	1.43659	0.930072	0.85876	2.8809	3.6289	0.576142	2.25282	2.62177	2.8361
PLAC8L1	4.30792	5.90743	0.920343	14.9471	11.5016	20.2303	10.3164	12.5683	11.5843	2.47813	17.6043	12.8013	18.5998
HTR4	1.43319	1.48788	205.498	4.11618	3.97601	4.32287	2.77484	3.84039	8.13316	1.9861	6.43147	3.91572	7.09656
ATP1A1	141.014	194.719	14.782	119.767	96.7747	71.0805	81.2354	108.523	79.1262	56.3425	107.369	66.3919	102.4
TCOF1	18.8627	21.5977	#N/A	13.3224	9.75893	11.0365	6.18871	12.2111	9.88428	7.22653	11.9477	5.96819	9.79599
