# Supplementary material for: Transcriptome Analysis Reveals Candidate Genes Regulating the Skin and Hair Diversity of Xinji Fine-Wool Sheep and Tan Sheep
Source: MDPI journal article supplement (doi:10.3390/agriculture12010015), 2021-12-23
Supplement: s1 [file s1 › Supplementary Table S12.xlsx]

## Sheet: Sheet1
Table S12 | Go annotation and KEGG pathway analysis of 1327 differentially expressed mRNAs.
source	term_name	term_id	adjusted-p-value	negative_log10_of_adjusted_p_value	term_size	query_size	intersection_size	effective_domain_size	intersections
GO:BP	system development	GO:0048731	1.26e-07	6.90017	2952	776	229	14723	CYFIP2,FAM172A,COL25A1,UNC5C,GRID2,MSX1,LDB2,GAK,MAP2K5,LRP10,MMP14,SALL2,ZNF219,NDRG2,MEIS2,CHAC1,TYRO3,ARF6,MNAT1,ZFP36L1,ACTN1,IRF2BPL,FABP7,CEP85L,THEMIS,CITED2,SLC39A1,ADGRB3,SHC1,ZBTB7B,TRPS1,CSMD3,ZFPM2,LMNA,MEF2D,KLHL1,CRABP2,CUL4A,RAB11FIP4,GIT1,DVL2,ATP1B2,TP53,KDM6B,ALOX15B,PPP1R9B,ITGA3,DLX3,NGFR,HOXB2,NFE2L1,ERBB2,ORMDL3,THRA,JUP,KAT2A,SLC4A1,FZD2,FASN,ACTG1,SLC9A3R1,ETNK2,MARK1,MFN2…
GO:BP	localization	GO:0051179	4.5e-07	6.34639	4302	776	306	14723	SLC9B1,UNC5C,GRID2,SNCA,KCNIP4,CORIN,SLC4A4,MSX1,LDB2,BLOC1S4,MFSD10,GAK,SLC24A1,LRP10,MMP14,TYRO3,ARF6,LIPC,UNC13C,ATP8B4,HSPA2,ZFP36L1,ACTN1,IFT43,SPATA7,CEP85L,SLC18B1,SLC35D3,GRM1,GJB4,SLC39A1,KCNQ5,KCNQ3,ZBTB7B,RIMS2,LMNA,SLC7A1,GJB2,NALCN,BCAS3,ASIC2,TNFAIP1,GIT1,CLUH,TAX1BP3,P2RX5,KIF1C,SLC16A11,DVL2,ATP1B2,TP53,PIRT,SREBF1,PPP1R9B,ITGA3,NGFR,NFE2L1,LASP1,ERBB2,ORMDL3,JUP,SLC4A1,PITPNC1,SL…
GO:CC	cell junction	GO:0030054	4.74e-07	6.32444	1086	774	105	14438	CYFIP2,GRID2,SNCA,UNC13C,ACTN1,FABP7,THEMIS,GRM1,GJB4,RIMS2,GJB2,GIT1,P2RX5,ATP1B2,ALOX15B,ITGA3,NGFR,LASP1,JUP,ACTG1,GRIN2C,CDC42EP4,CLSTN1,DVL1,AGRN,NPHS2,PLCB4,SNAP25,FRMD4A,CACNB2,DNAJC5,LAMA5,GRIK1,TRPC6,JAML,NLRX1,MAPK8IP1,SLC1A3,GABRG3,LPP,PRKD1,FRMD5,CCDC85C,MYRIP,CADPS,ERC2,CACNA1D,SEMA3F,DAG1,SLC29A1,DSP,DLG2,CFL1,PI4K2A,ABCC2,COL17A1,SORCS3,DLGAP1,CLSTN2,DCC,CLDN4,CTNNA3,DLGAP2,DLC1,NR…
GO:BP	anatomical structure development	GO:0048856	8.28e-07	6.08208	3581	776	263	14723	CYFIP2,EBF1,FAM172A,COL25A1,BDH2,UNC5C,GRID2,MSX1,LDB2,GAK,MAP2K5,LRP10,MMP14,SALL2,ZNF219,NDRG2,MEIS2,CHAC1,TYRO3,ARF6,MNAT1,HSPA2,ZFP36L1,ACTN1,IRF2BPL,MEI4,FABP7,CEP85L,THEMIS,CITED2,SLC39A1,ADGRB3,SHC1,ZBTB7B,COLEC10,TRPS1,CSMD3,ZFPM2,RAD54B,LMNA,MEF2D,KLHL1,CRABP2,CUL4A,BCAS3,RAB11FIP4,GIT1,DVL2,ATP1B2,TP53,KDM6B,ALOX15B,PPP1R9B,ITGA3,DLX3,NGFR,HOXB2,NFE2L1,ERBB2,ORMDL3,THRA,JUP,KAT2A,RUNDC1…
GO:BP	multicellular organism development	GO:0007275	1.85955e-06	5.73059	3219	776	240	14723	CYFIP2,EBF1,FAM172A,COL25A1,UNC5C,GRID2,MSX1,LDB2,GAK,MAP2K5,LRP10,MMP14,SALL2,ZNF219,NDRG2,MEIS2,CHAC1,TYRO3,ARF6,MNAT1,ZFP36L1,ACTN1,IRF2BPL,FABP7,CEP85L,THEMIS,CITED2,SLC39A1,ADGRB3,SHC1,ZBTB7B,TRPS1,CSMD3,ZFPM2,RAD54B,LMNA,MEF2D,KLHL1,CRABP2,CUL4A,BCAS3,RAB11FIP4,GIT1,DVL2,ATP1B2,TP53,KDM6B,ALOX15B,PPP1R9B,ITGA3,DLX3,NGFR,HOXB2,NFE2L1,ERBB2,ORMDL3,THRA,JUP,KAT2A,RUNDC1,SLC4A1,FZD2,FASN,ACTG1,…
GO:CC	cell periphery	GO:0071944	2.96606e-06	5.52782	3307	774	244	14438	SGCD,UNC5C,GRID2,SNCA,KCNIP4,CORIN,EPHA5,SLC4A4,LDB2,FGFR3,SLC24A1,MMP14,GPR176,TYRO3,ARF6,ATP8B4,HSPA2,SPTB,FABP7,GRM1,GJB4,SLC39A1,KCNQ5,ADGRB3,KCNQ3,ANXA13,SHC1,EFNA3,CSMD3,ENOX1,GJB2,GPC5,BCAS3,RAB11FIP4,TAX1BP3,P2RX5,SLC16A11,DVL2,ATP1B2,ALOX15B,PIRT,LLGL1,PPP1R9B,ITGA3,NGFR,LASP1,ERBB2,JUP,SLC4A1,FZD2,UTS2R,FASN,C1QTNF1,GRIN2C,SLC9A3R1,CDC42EP4,SSTR2,FMOD,PRELP,C12H1ORF116,KCNT2,CLSTN1,PLCH…
GO:CC	synapse	GO:0045202	5.44699e-06	5.26384	638	774	69	14438	CYFIP2,GRID2,SNCA,UNC13C,ACTN1,GRM1,RIMS2,GIT1,P2RX5,ATP1B2,ITGA3,NGFR,ACTG1,GRIN2C,CLSTN1,DVL1,AGRN,PLCB4,SNAP25,CACNB2,DNAJC5,LAMA5,GRIK1,MAPK8IP1,SLC1A3,GABRG3,MYRIP,CADPS,ERC2,CACNA1D,SEMA3F,DAG1,SLC29A1,DLG2,PI4K2A,SORCS3,DLGAP1,CLSTN2,DCC,DLGAP2,NRG1,GLRA2,ARHGEF9,OPHN1,ATP2B3,GPC1,IL1RAPL2,MUSK,PTPRD,SH3GL2,ZNF804A,KCNJ3,TMEM163,RAB3B,ERBB4,SEMA4C,SYT1,PPFIA2,GRIP1,PPP1R9A,DGKB,GRM3,CHRM2,…
GO:BP	developmental process	GO:0032502	9.18563e-06	5.03689	3872	776	275	14723	CYFIP2,EBF1,FAM172A,COL25A1,BDH2,UNC5C,GRID2,MSX1,LDB2,GAK,MAP2K5,LRP10,MMP14,SALL2,ZNF219,NDRG2,MEIS2,CHAC1,TYRO3,ARF6,MNAT1,HSPA2,ZFP36L1,ACTN1,IRF2BPL,MEI4,FABP7,CEP85L,THEMIS,CITED2,SLC39A1,ADGRB3,NSMCE2,SHC1,ZBTB7B,COLEC10,TRPS1,CSMD3,ZFPM2,RAD54B,LMNA,MEF2D,KLHL1,CRABP2,CUL4A,BCAS3,RAB11FIP4,GIT1,DVL2,ATP1B2,TP53,KDM6B,ALOX15B,SREBF1,PPP1R9B,ITGA3,DLX3,NGFR,HOXB2,NFE2L1,ERBB2,ORMDL3,THRA,JU…
GO:CC	intermediate filament	GO:0005882	1.54548e-05	4.81094	99	774	21	14438	LMNA,BIIIB4,LOC101111893,LOC101112404,LOC101113159,LOC101112657,LOC101107617,KRT15,LOC101118459,JUP,DSP,UPP2,KRT79,KRT72,KRT74,KRT71,KRT5,KRT82,KRT84,LOC101113055,LMNB2
GO:BP	anatomical structure morphogenesis	GO:0009653	2.01737e-05	4.69521	1750	776	145	14723	CYFIP2,COL25A1,UNC5C,GRID2,MSX1,MMP14,ZNF219,TYRO3,ACTN1,CITED2,SLC39A1,ADGRB3,SHC1,ZFPM2,MEF2D,CRABP2,BCAS3,DVL2,TP53,KDM6B,ITGA3,DLX3,NGFR,HOXB2,ERBB2,THRA,JUP,KAT2A,VAT1,FZD2,ACTG1,SLC9A3R1,CDC42EP4,MFN2,DVL1,LAMA5,FITM2,WWOX,MYLK3,ADGRG1,MMP15,PAK4,DYRK1B,MEGF8,GSK3A,FUT1,MYH14,EPN1,C15H11ORF65,BCL9L,PDE3B,INPPL1,FGF10,SLC1A3,CTNND2,HEYL,PLA2G3,CRKL,FURIN,SEMA7A,CRYGS,CAP1,EPHB3,CHRD,GORASP1,…
GO:BP	nervous system development	GO:0007399	6.60599e-05	4.18006	1351	776	117	14723	CYFIP2,COL25A1,UNC5C,GRID2,MSX1,GAK,SALL2,NDRG2,CHAC1,TYRO3,ARF6,MNAT1,IRF2BPL,FABP7,CEP85L,CITED2,CSMD3,KLHL1,CRABP2,GIT1,DVL2,ATP1B2,TP53,PPP1R9B,ITGA3,NGFR,HOXB2,NFE2L1,ERBB2,ORMDL3,KAT2A,FZD2,SLC9A3R1,MARK1,CLSTN1,DVL1,PLCB1,SNAP25,ADGRG1,ATXN1L,ZNF536,PAK4,MEGF8,CIC,TPP1,NDUFS4,FGF10,SLC1A3,CTNND2,HEYL,RAB35,PLA2G3,CRKL,SEMA7A,MYCL,CCDC85C,EPHB3,CHRD,GORASP1,EIF4G1,ULK4,CNTN4,SEMA3G,SEMA3F,D…
GO:CC	keratin filament	GO:0045095	0.000122376	3.9123	52	774	14	14438	BIIIB4,LOC101111893,LOC101112404,LOC101113159,LOC101112657,LOC101107617,KRT79,KRT72,KRT74,KRT71,KRT5,KRT82,KRT84,LOC101113055
GO:BP	animal organ development	GO:0048513	0.000134307	3.8719	2154	776	167	14723	FAM172A,UNC5C,GRID2,MSX1,LDB2,MAP2K5,LRP10,MMP14,SALL2,ZNF219,MEIS2,TYRO3,ARF6,MNAT1,ZFP36L1,ACTN1,FABP7,THEMIS,CITED2,SLC39A1,SHC1,ZBTB7B,ZFPM2,LMNA,MEF2D,KLHL1,CUL4A,RAB11FIP4,GIT1,DVL2,ATP1B2,TP53,KDM6B,ALOX15B,ITGA3,DLX3,NGFR,HOXB2,NFE2L1,ERBB2,THRA,JUP,KAT2A,SLC4A1,FZD2,FASN,SLC9A3R1,ETNK2,MFN2,DVL1,NPHS2,PLCB1,LAMA5,WWOX,ADGRG1,ATXN1L,DYRK1B,MEGF8,CIC,GSK3A,CLPTM1,MYH14,EPN1,BCL9L,SOX6,NUMA…
GO:CC	plasma membrane	GO:0005886	0.000143672	3.84263	3048	774	220	14438	SGCD,UNC5C,GRID2,SNCA,KCNIP4,CORIN,EPHA5,SLC4A4,LDB2,FGFR3,SLC24A1,MMP14,GPR176,TYRO3,ARF6,ATP8B4,HSPA2,GRM1,GJB4,SLC39A1,KCNQ5,ADGRB3,KCNQ3,ANXA13,SHC1,EFNA3,CSMD3,ENOX1,GJB2,GPC5,RAB11FIP4,TAX1BP3,P2RX5,SLC16A11,DVL2,ATP1B2,ALOX15B,PIRT,PPP1R9B,ITGA3,NGFR,ERBB2,JUP,SLC4A1,FZD2,UTS2R,FASN,C1QTNF1,GRIN2C,SLC9A3R1,CDC42EP4,SSTR2,C12H1ORF116,KCNT2,CLSTN1,PLCH2,DVL1,AGRN,NPHS2,SNAP25,PRKCQ,CUBN,CACN…
GO:CC	intermediate filament cytoskeleton	GO:0045111	0.000314644	3.50218	137	774	23	14438	MMP14,LMNA,BCAS3,BIIIB4,LOC101111893,LOC101112404,LOC101113159,LOC101112657,LOC101107617,KRT15,LOC101118459,JUP,DSP,UPP2,KRT79,KRT72,KRT74,KRT71,KRT5,KRT82,KRT84,LOC101113055,LMNB2
GO:BP	skin development	GO:0043588	0.000717156	3.14439	184	776	28	14723	LDB2,ZFP36L1,ALOX15B,ITGA3,NGFR,JUP,LAMA5,NUMA1,FGF10,SRF,CDSN,DSP,ST14,OVOL1,DNASE1L2,PLA2G10,CLDN4,EDA,KDF1,DHCR24,EPHA2,COL5A1,SLC27A4,EDAR,HOXC13,KRT71,KRT84,SMO
GO:BP	mesenchymal cell development	GO:0014031	0.000951988	3.02137	54	776	14	14723	FAM172A,CITED2,LAMA5,HEYL,SEMA3F,CFL1,MAPK3,RET,EFNB1,ERBB4,PEF1,SEMA3A,SMO,TCOF1
GO:BP	transport	GO:0006810	0.00102839	2.98784	3108	776	220	14723	SLC9B1,GRID2,SNCA,KCNIP4,CORIN,SLC4A4,BLOC1S4,MFSD10,GAK,SLC24A1,LRP10,TYRO3,ARF6,LIPC,UNC13C,ATP8B4,HSPA2,ZFP36L1,IFT43,SLC18B1,SLC35D3,GRM1,GJB4,SLC39A1,KCNQ5,KCNQ3,ZBTB7B,RIMS2,LMNA,SLC7A1,GJB2,NALCN,BCAS3,ASIC2,GIT1,P2RX5,KIF1C,SLC16A11,ATP1B2,TP53,PIRT,SREBF1,NGFR,NFE2L1,LASP1,ERBB2,JUP,SLC4A1,PITPNC1,SLC25A10,ACTG1,C1QTNF1,LGALS3BP,UBE2O,LLGL2,GRIN2C,SLC9A3R1,TOMM40L,C4BPA,KCNT2,CLSTN1,DVL1…
GO:CC	cytoskeleton	GO:0005856	0.00120581	2.91872	1469	774	118	14438	SGCD,ANK2,SNCA,CORIN,MAP2K5,MMP14,HSPA2,SPTB,ACTN1,IFT43,SPATA7,CEP85L,EPPK1,LMNA,BCAS3,GIT1,TAX1BP3,TP53,CHD3,ALOX15B,LLGL1,PPP1R9B,LASP1,BIIIB4,LOC101111893,LOC101112404,LOC101113159,LOC101112657,LOC101107617,KRT15,LOC101118459,JUP,KAT2A,SLC4A1,ACTG1,CDC42EP4,NME7,MFN2,KLHL21,DVL1,TRAF5,SNAP25,PRKCQ,FRMD4A,TUBB1,MYLK3,CDCA8,CCDC8,MYH14,DNHD1,NUMA1,FBXL7,PLA2G3,MAP1A,FRMD5,CAP1,DYNC1H1,CDC42BPB,…
GO:BP	establishment of localization	GO:0051234	0.00165668	2.78076	3230	776	226	14723	SLC9B1,GRID2,SNCA,KCNIP4,CORIN,SLC4A4,BLOC1S4,MFSD10,GAK,SLC24A1,LRP10,TYRO3,ARF6,LIPC,UNC13C,ATP8B4,HSPA2,ZFP36L1,IFT43,SLC18B1,SLC35D3,GRM1,GJB4,SLC39A1,KCNQ5,KCNQ3,ZBTB7B,RIMS2,LMNA,SLC7A1,GJB2,NALCN,BCAS3,ASIC2,GIT1,P2RX5,KIF1C,SLC16A11,ATP1B2,TP53,PIRT,SREBF1,NGFR,NFE2L1,LASP1,ERBB2,JUP,SLC4A1,PITPNC1,SLC25A10,ACTG1,C1QTNF1,LGALS3BP,UBE2O,WBP2,LLGL2,GRIN2C,SLC9A3R1,TOMM40L,C4BPA,KCNT2,MARK1,…
GO:BP	synaptic signaling	GO:0099536	0.00225085	2.64765	374	776	43	14723	GRID2,SNCA,UNC13C,RIMS2,GIT1,P2RX5,PPP1R9B,KAT2A,GRIN2C,CLSTN1,DVL1,AGRN,PLCB4,SNAP25,CACNB2,SLC1A3,CADPS,ERC2,DAG1,SRF,LOC101119591,DLG2,RIN1,SORCS3,DLGAP1,CLSTN2,DCC,YWHAG,DLGAP2,NRG1,GLRA2,PTPRD,SLC24A2,RAB3B,PLCL1,SYT1,LIN7A,PPP1R9A,DGKB,CHRM2,DGKI,PRKACA,HTR4
GO:BP	neural crest cell development	GO:0014032	0.00234574	2.62972	50	776	13	14723	FAM172A,CITED2,LAMA5,SEMA3F,CFL1,MAPK3,RET,EFNB1,ERBB4,PEF1,SEMA3A,SMO,TCOF1
GO:MF	protein binding	GO:0005515	0.00407043	2.39036	6488	793	405	14850	CYFIP2,EBF1,ANK2,ARHGEF38,BANK1,UNC5C,GRID2,SNCA,ANKRD35,KLB,CORIN,EPHA5,SLC4A4,MSX1,C1QTNF7,LDB2,FGFR3,ANKRD31,MAP2K5,LOC101122398,DCAF11,LRP10,MEIS2,CHAC1,TYRO3,ARF6,LIPC,MNAT1,WDR89,HSPA2,SPTB,ZFP36L1,ACTN1,UBE3D,CITED2,ADGB,PDE10A,KCNQ3,SHC1,ZBTB7B,EFNA3,COLEC10,TRPS1,ZFPM2,RIMS2,WWP1,MEF2D,GJB2,KLHL1,CRABP2,HDGF,CUL4A,CUEDC1,BCAS3,RAB11FIP4,TNFAIP1,GIT1,PRPF8,CLUH,ASPA,TAX1BP3,KIF1C,DVL2,ATP…
GO:BP	regulation of biological quality	GO:0065008	0.004704	2.32753	2358	776	172	14723	CYFIP2,GRID2,SNCA,CORIN,SLC4A4,MSX1,LDB2,BLOC1S4,SLC24A1,TYRO3,ARF6,LIPC,UNC13C,ZFP36L1,SPATA7,SLC35D3,CITED2,GRM1,KCNQ3,NSMCE2,ZBTB7B,RIMS2,LMNA,CRABP2,GIT1,P2RX5,ATP1B2,TP53,KDM6B,SREBF1,NGFR,NFE2L1,ORMDL3,THRA,JUP,KAT2A,SLC4A1,UTS2R,C1QTNF1,GRIN2C,SLC9A3R1,CDC42EP4,MFN2,CLSTN1,DVL1,SERPINC1,SNAP25,PRKCQ,CACNB2,PCSK2,CDK5RAP1,FITM2,SLC7A5,MYLK3,ADGRG1,LTBP4,MEGF8,GSK3A,MYH14,TRPC6,TPP1,ANO3,FGF…
GO:BP	stem cell development	GO:0048864	0.00480264	2.31852	53	776	13	14723	FAM172A,CITED2,LAMA5,SEMA3F,CFL1,MAPK3,RET,EFNB1,ERBB4,PEF1,SEMA3A,SMO,TCOF1
GO:BP	cellular developmental process	GO:0048869	0.00495022	2.30538	2527	776	182	14723	CYFIP2,FAM172A,COL25A1,BDH2,UNC5C,GRID2,MSX1,GAK,MMP14,ZNF219,NDRG2,MEIS2,CHAC1,TYRO3,ARF6,HSPA2,ZFP36L1,ACTN1,MEI4,FABP7,CEP85L,THEMIS,CITED2,ADGRB3,NSMCE2,ZBTB7B,CSMD3,ZFPM2,LMNA,MEF2D,KLHL1,CRABP2,CUL4A,GIT1,ATP1B2,TP53,KDM6B,ALOX15B,SREBF1,PPP1R9B,ITGA3,DLX3,NGFR,NFE2L1,ERBB2,THRA,KAT2A,SLC4A1,FZD2,FASN,ACTG1,SLC9A3R1,PRELP,MARK1,DVL1,AGRN,NPHS2,SNAP25,LAMA5,WWOX,MYLK3,ADGRG1,MMP15,ZNF536,PAK…
GO:MF	binding	GO:0005488	0.00604361	2.2187	10783	793	626	14850	LARP1,CYFIP2,EBF1,MCTP1,ANK2,ARHGEF38,BDH2,BANK1,UNC5C,GRID2,SNCA,KCNIP4,ANKRD35,KLB,CORIN,EPHA5,SLC4A4,STK32B,MSX1,C1QTNF7,LDB2,FGFR3,GAK,ANKRD31,PDE8B,RASL12,MAP2K5,NYNRIN,LOC101122398,DCAF11,THTPA,SF3B4,LRP10,MMP14,SALL2,ZNF219,MEIS2,BAHD1,RHOV,CHAC1,EXD1,TYRO3,CERS2,ARF6,LIPC,UNC13C,ATP8B4,MNAT1,WDR89,HSPA2,SPTB,ZFP36L1,ACTN1,RPTN,EFCAB11,UBE3D,FABP7,CITED2,ADGB,PDE10A,RNASET2,B3GAT2,KCNQ3,NS…
KEGG	Arrhythmogenic right ventricular cardiomyopathy	KEGG:05412	0.00641953	2.1925	72	384	14	6560	SGCD,LMNA,ITGA3,JUP,ACTG1,CACNB2,CACNA2D3,CACNA1D,DAG1,DSP,RYR2,CTNNA3,CTNNA2,CACNB3
GO:BP	neuron projection development	GO:0031175	0.00654156	2.18432	564	776	56	14723	CYFIP2,COL25A1,UNC5C,GRID2,GAK,ARF6,CSMD3,KLHL1,CRABP2,ATP1B2,PPP1R9B,NGFR,ERBB2,SLC9A3R1,MARK1,DVL1,SNAP25,PAK4,MEGF8,CTNND2,RAB35,PLA2G3,SEMA7A,EPHB3,GORASP1,ULK4,CNTN4,SEMA3G,SEMA3F,DAG1,SRF,HSP90AB1,DDR1,PRKG1,DCC,PLA2G10,NYAP1,TRIM67,RET,UNC5B,OPHN1,EFNB1,PTPRF,SH3GL2,ZNF804A,NYAP2,ITM2C,SYT1,PPFIA2,GRIP1,SEMA3A,AMIGO1,CAMSAP3,FSTL4,SPOCK1,GFRA3
GO:CC	polymeric cytoskeletal fiber	GO:0099513	0.00779398	2.10824	361	774	39	14438	ACTN1,LMNA,BCAS3,BIIIB4,LOC101111893,LOC101112404,LOC101113159,LOC101112657,LOC101107617,KRT15,LOC101118459,JUP,ACTG1,KLHL21,TUBB1,NUMA1,MAP1A,DYNC1H1,DSP,MAP3K11,KLC2,CORO1B,HAUS1,ZNF804A,UPP2,KIF3C,DYNC2LI1,NAV3,KRT79,KRT72,KRT74,KRT71,KRT5,KRT82,KRT84,LOC101113055,TUBA8,CAMSAP3,LMNB2
GO:BP	cell development	GO:0048468	0.008538	2.06864	1296	776	105	14723	CYFIP2,FAM172A,COL25A1,UNC5C,GRID2,GAK,TYRO3,ARF6,HSPA2,ACTN1,MEI4,CITED2,CSMD3,LMNA,KLHL1,CRABP2,GIT1,ATP1B2,TP53,PPP1R9B,NGFR,ERBB2,SLC4A1,FZD2,FASN,ACTG1,SLC9A3R1,MARK1,DVL1,NPHS2,SNAP25,LAMA5,MYLK3,PAK4,MEGF8,GSK3A,SLC1A3,CTNND2,HEYL,RAB35,PLA2G3,CRKL,SEMA7A,EPHB3,MYD88,GORASP1,ULK4,CNTN4,SEMA3G,SEMA3F,DAG1,NBEAL2,SPDEF,SRF,HSP90AB1,DDR1,ST14,CFL1,PRKG1,PDE6C,CABYR,DCC,DNASE1L2,PLA2G10,MAPK3,…
GO:BP	neurogenesis	GO:0022008	0.00895689	2.04784	991	776	85	14723	CYFIP2,COL25A1,UNC5C,GRID2,GAK,CHAC1,ARF6,FABP7,CEP85L,CSMD3,KLHL1,CRABP2,GIT1,ATP1B2,TP53,PPP1R9B,ITGA3,NGFR,NFE2L1,ERBB2,FZD2,SLC9A3R1,MARK1,DVL1,SNAP25,ADGRG1,ZNF536,PAK4,MEGF8,FGF10,SLC1A3,CTNND2,HEYL,RAB35,PLA2G3,CRKL,SEMA7A,MYCL,EPHB3,GORASP1,EIF4G1,ULK4,CNTN4,SEMA3G,SEMA3F,DAG1,SRF,HSP90AB1,DDR1,PRKG1,PDE6C,DCC,PLA2G10,MAPK3,YWHAG,NYAP1,TRIM67,RET,UNC5B,NRG1,OPHN1,EFNB1,PTPRF,SH3GL2,ZNF804…
GO:BP	intracellular signal transduction	GO:0035556	0.00948478	2.02297	1631	776	126	14723	BANK1,KLB,MSX1,FGFR3,MAP2K5,NDRG2,RHOV,CHAC1,TYRO3,ARF6,UNC13C,ZFP36L1,RGS6,GRM1,PDE10A,SHC1,CUL4A,TNFAIP1,TAX1BP3,DVL2,TP53,PIRT,SMCR8,PPP1R9B,ITGA3,NGFR,ERBB2,C1QTNF1,SLC9A3R1,CDC42EP4,RGS7,CAMTA1,PLCH2,DVL1,TRAF5,PLCB1,PLCB4,PRKCQ,RALGAPA2,WWOX,ADGRG1,GSK3A,GUCY1A2,NLRX1,MAPK8IP1,FGF10,KSR2,PI4KA,CRKL,AEN,SEMA7A,PRKD1,CDC42BPB,NEK10,MYD88,ULK4,ARHGEF3,DAG1,CDKN1A,HSP90AB1,BAG6,MECOM,TMEM109,PL…
GO:MF	channel activity	GO:0015267	0.0102003	1.99139	390	793	41	14850	GRID2,GJB4,KCNQ5,KCNQ3,GJB2,NALCN,ASIC2,P2RX5,GRIN2C,KCNT2,SNAP25,CACNB2,GRIK1,TRPC6,SLC9C1,GRIA2,GABRG3,SCN11A,CACNA2D3,CACNA1D,KCNMB3,KCNMB2,KCNQ1,CLDN4,TTYH3,RYR2,GLRA2,CLCN5,KCND1,AQP3,TRPM3,SLC24A2,SCN3A,KCNH7,KCNJ3,CACNB3,GRIN2B,LRRC8C,PANX2,TRPV6,ANO8
GO:MF	passive transmembrane transporter activity	GO:0022803	0.0102003	1.99139	390	793	41	14850	GRID2,GJB4,KCNQ5,KCNQ3,GJB2,NALCN,ASIC2,P2RX5,GRIN2C,KCNT2,SNAP25,CACNB2,GRIK1,TRPC6,SLC9C1,GRIA2,GABRG3,SCN11A,CACNA2D3,CACNA1D,KCNMB3,KCNMB2,KCNQ1,CLDN4,TTYH3,RYR2,GLRA2,CLCN5,KCND1,AQP3,TRPM3,SLC24A2,SCN3A,KCNH7,KCNJ3,CACNB3,GRIN2B,LRRC8C,PANX2,TRPV6,ANO8
KEGG	Vascular smooth muscle contraction	KEGG:04270	0.0107387	1.96905	114	384	18	6560	PLCB1,PLCB4,PRKCQ,ADRA1D,MYLK3,MYH14,GUCY1A2,PLA2G3,CACNA1D,KCNMB2,PRKG1,PLA2G10,MAPK3,ARAF,CALCRL,MYH9,PRKACA,GNA11
GO:BP	vesicle-mediated transport in synapse	GO:0099003	0.0117079	1.93152	123	776	20	14723	SNCA,UNC13C,RIMS2,GIT1,ACTG1,CLSTN1,DVL1,SNAP25,DNAJC5,CADPS,ERC2,BTBD9,OPHN1,SH3GL2,RAB3B,SYT1,GRIP1,MAGI2,CHRM2,DGKI
GO:BP	positive regulation of biological process	GO:0048518	0.0130459	1.88453	3862	776	257	14723	CYFIP2,BANK1,UNC5C,GRID2,SNCA,KLB,SLC4A4,MSX1,LDB2,FGFR3,MMP14,SALL2,ZNF219,MEIS2,TYRO3,ARF6,USP50,MNAT1,HSPA2,ZFP36L1,ACTN1,IRF2BPL,THEMIS,SLC35D3,CITED2,GRM1,NSMCE2,SHC1,ZBTB7B,ZFPM2,LMNA,MEF2D,CRABP2,CUL4A,BCAS3,RAB11FIP4,GIT1,DVL2,ATP1B2,TP53,KDM6B,ALOX15B,PIRT,SMCR8,SREBF1,USP22,ITGA3,DLX3,NGFR,HOXB2,NFE2L1,ERBB2,ORMDL3,THRA,JUP,KAT2A,ATXN7L3,FZD2,ACTG1,C1QTNF1,UBE2O,WBP2,SLC9A3R1,CDC42EP4,C…
GO:BP	regulation of cellular component organization	GO:0051128	0.0138554	1.85838	1452	776	114	14723	CYFIP2,GRID2,MSX1,GAK,MMP14,ARF6,USP50,MNAT1,HSPA2,SENP6,NSMCE2,ZBTB7B,CSMD3,LMNA,CRABP2,BCAS3,GIT1,ATP1B2,TP53,SMCR8,SREBF1,PPP1R9B,NFE2L1,ERBB2,THRA,KAT2A,VAT1,ACTG1,WBP2,CDC42EP4,MARK1,CLSTN1,DVL1,PLEKHM2,SNAP25,PRKCQ,MEGF8,GSK3A,CCDC8,C15H11ORF65,NUMA1,PLA2G3,SEMA7A,STXBP6,DYNC1H1,EPHB3,GORASP1,EIF4G1,ULK4,SEMA3G,SEMA3F,DAG1,CDKN1A,BTBD9,SRF,DDR1,RPS6KA4,CFL1,CORO1B,PSMA8,CLSTN2,MLST8,CLEC16A…
GO:BP	neural crest cell differentiation	GO:0014033	0.0141073	1.85056	58	776	13	14723	FAM172A,CITED2,LAMA5,SEMA3F,CFL1,MAPK3,RET,EFNB1,ERBB4,PEF1,SEMA3A,SMO,TCOF1
GO:BP	regulation of cell communication	GO:0010646	0.0145634	1.83674	2069	776	152	14723	CYFIP2,BANK1,GRID2,SNCA,KLB,MSX1,FGFR3,MMP14,NDRG2,CHAC1,TYRO3,ARF6,UNC13C,CITED2,GRM1,PDE10A,SHC1,ZBTB7B,LMNA,GPC5,CUL4A,TNFAIP1,GIT1,TAX1BP3,DVL2,TP53,ALOX15B,SMCR8,SREBF1,PPP1R9B,ITGA3,NGFR,ERBB2,THRA,KAT2A,C1QTNF1,UBE2O,WBP2,SLC9A3R1,RGS7,CLSTN1,CAMTA1,DVL1,TRAF5,PLCB1,PLCB4,SNAP25,PRKCQ,RALGAPA2,WWOX,ADGRG1,ZNF536,APLP1,MEGF8,GSK3A,BCL9L,NLRX1,NUMA1,SLC35C1,MAPK8IP1,ZDHHC5,FGF10,SLC1A3,CTNND…
GO:BP	trans-synaptic signaling	GO:0099537	0.015987	1.79623	364	776	40	14723	GRID2,SNCA,UNC13C,RIMS2,GIT1,P2RX5,PPP1R9B,KAT2A,GRIN2C,CLSTN1,DVL1,PLCB4,SNAP25,CACNB2,SLC1A3,CADPS,ERC2,DAG1,SRF,DLG2,RIN1,SORCS3,DLGAP1,CLSTN2,DCC,YWHAG,DLGAP2,GLRA2,PTPRD,SLC24A2,RAB3B,PLCL1,SYT1,LIN7A,PPP1R9A,DGKB,CHRM2,DGKI,PRKACA,HTR4
GO:CC	transmembrane transporter complex	GO:1902495	0.0161233	1.79255	208	774	26	14438	GRID2,KCNIP4,HSPA2,KCNQ5,KCNQ3,ATP1B2,GRIN2C,CACNB2,GABRG3,SCN11A,CACNA1D,KCNMB3,KCNQ1,TTYH3,RYR2,GLRA2,KCND1,ATP1B4,SCN3A,KCNJ3,CACNB3,GRIN2B,LRRC8C,ABCB8,AMIGO1,ATP1A1
GO:BP	regulation of signaling	GO:0023051	0.0166394	1.77886	2074	776	152	14723	CYFIP2,BANK1,GRID2,SNCA,KLB,MSX1,FGFR3,MMP14,NDRG2,CHAC1,TYRO3,ARF6,UNC13C,CITED2,GRM1,PDE10A,SHC1,ZBTB7B,LMNA,GPC5,CUL4A,TNFAIP1,GIT1,TAX1BP3,DVL2,TP53,ALOX15B,SMCR8,SREBF1,PPP1R9B,ITGA3,NGFR,ERBB2,THRA,KAT2A,C1QTNF1,UBE2O,WBP2,SLC9A3R1,RGS7,CLSTN1,CAMTA1,DVL1,TRAF5,PLCB1,PLCB4,SNAP25,PRKCQ,RALGAPA2,WWOX,ADGRG1,ZNF536,APLP1,MEGF8,GSK3A,BCL9L,NLRX1,NUMA1,SLC35C1,MAPK8IP1,ZDHHC5,FGF10,SLC1A3,CTNND…
GO:BP	regulation of localization	GO:0032879	0.0188939	1.72368	1654	776	126	14723	UNC5C,SNCA,KCNIP4,CORIN,LDB2,MMP14,ARF6,HSPA2,ZFP36L1,ACTN1,SLC35D3,KCNQ5,RIMS2,LMNA,BCAS3,GIT1,TAX1BP3,ATP1B2,PIRT,SREBF1,ITGA3,NGFR,ERBB2,ORMDL3,JUP,ACTG1,C1QTNF1,SLC9A3R1,PARP1,DVL1,PLEKHM2,RABGAP1L,SNAP25,FRMD4A,CACNB2,DNAJC5,LAMA5,FITM2,MBTPS1,ADGRG1,GSK3A,FUT1,TRPC6,C15H11ORF65,TRIM29,NUMA1,ZDHHC5,FGF10,CASR,PLA2G3,CRKL,LRRC15,FGF12,FURIN,PRKD1,FRMD5,DYNC1H1,CHRD,MYD88,SCN11A,ULK4,CACNA2D3,…
GO:BP	neuron differentiation	GO:0030182	0.0190827	1.71936	801	776	71	14723	CYFIP2,COL25A1,UNC5C,GRID2,GAK,ARF6,CSMD3,KLHL1,CRABP2,GIT1,ATP1B2,PPP1R9B,NGFR,NFE2L1,ERBB2,FZD2,SLC9A3R1,MARK1,DVL1,SNAP25,ZNF536,PAK4,MEGF8,SLC1A3,CTNND2,HEYL,RAB35,PLA2G3,SEMA7A,MYCL,EPHB3,GORASP1,EIF4G1,ULK4,CNTN4,SEMA3G,SEMA3F,DAG1,SRF,HSP90AB1,DDR1,PRKG1,PDE6C,DCC,PLA2G10,YWHAG,NYAP1,TRIM67,RET,UNC5B,NRG1,OPHN1,EFNB1,PTPRF,SH3GL2,ZNF804A,HOXD3,DLX2,ERBB4,NYAP2,ITM2C,SYT1,PPFIA2,GRIP1,SEMA3…
GO:MF	extracellular matrix binding	GO:0050840	0.0221488	1.65465	27	793	8	14850	AGRN,ADGRG1,BCAM,LRRC15,SPOCK2,BGN,GPC1,OLFML2A
GO:BP	cell junction organization	GO:0034330	0.0239577	1.62056	410	776	43	14723	GRID2,SNCA,ARF6,ACTN1,GJB2,BCAS3,ITGA3,ERBB2,JUP,ACTG1,CLSTN1,DVL1,CTNND2,EPHB3,EIF4G1,ERC2,SEMA3F,DAG1,SRF,DSP,DLG2,COL17A1,CLSTN2,DLC1,NRG1,ARHGAP6,ARHGEF9,OPHN1,IL1RAPL2,MUSK,PTPRF,PTPRD,FZD5,ERBB4,EPHA2,PPFIA2,DGKB,MAGI2,AMIGO1,PRKACA,CAMSAP3,DAPK3,LOC101105495
GO:BP	cellular localization	GO:0051641	0.0276473	1.55835	1732	776	130	14723	GRID2,SNCA,MSX1,BLOC1S4,GAK,MMP14,ARF6,UNC13C,ZFP36L1,IFT43,SPATA7,SLC35D3,RIMS2,LMNA,BCAS3,GIT1,CLUH,TAX1BP3,DVL2,TP53,SREBF1,ITGA3,NGFR,ERBB2,ORMDL3,JUP,SLC4A1,ACTG1,UBE2O,GRIN2C,SLC9A3R1,TOMM40L,MARK1,PARP1,CLSTN1,KLHL21,DVL1,AGRN,PLEKHM2,SNAP25,DNAJC5,LAMA5,MON1B,MBTPS1,CDCA8,AP2A1,C15H11ORF65,TRIM29,TPP1,NUMA1,ZDHHC5,RANBP17,FGF10,RAB35,PLA2G3,LRRC15,PRKD1,DYNC1H1,GORASP1,MYRIP,AP2M1,CADPS,E…
GO:BP	multicellular organismal process	GO:0032501	0.0278752	1.55478	4813	776	308	14723	CYFIP2,EBF1,FAM172A,COL25A1,BANK1,UNC5C,GRID2,SNCA,CORIN,MSX1,LDB2,BLOC1S4,GAK,SLC24A1,MAP2K5,LRP10,MMP14,SALL2,ZNF219,NDRG2,MEIS2,CHAC1,TYRO3,ARF6,USP50,MNAT1,HSPA2,ZFP36L1,ACTN1,IRF2BPL,SPATA7,MEI4,FABP7,CEP85L,THEMIS,SLC35D3,CITED2,GRM1,GJB4,SLC39A1,ADGRB3,SHC1,ZBTB7B,TRPS1,CSMD3,ZFPM2,RAD54B,LMNA,MEF2D,KLHL1,CRABP2,CUL4A,BCAS3,RAB11FIP4,GIT1,P2RX5,DVL2,ATP1B2,TP53,KDM6B,ALOX15B,PIRT,SREBF1,PP…
GO:MF	glutamate receptor activity	GO:0008066	0.0281031	1.55125	21	793	7	14850	GRID2,GRM1,GRIN2C,GRIK1,GRIA2,GRIN2B,GRM3
GO:BP	movement of cell or subcellular component	GO:0006928	0.0281962	1.54981	1332	776	105	14723	UNC5C,LDB2,BLOC1S4,MMP14,TYRO3,ARF6,ACTN1,IFT43,CEP85L,LMNA,BCAS3,TNFAIP1,KIF1C,ATP1B2,PPP1R9B,ITGA3,NGFR,ERBB2,JUP,ACTG1,SLC9A3R1,DVL1,PRKCQ,CACNB2,LAMA5,ADGRG1,LOC101103916,MEGF8,GSK3A,FUT1,MYH14,JAML,DNHD1,SLC9C1,FGF10,PLA2G3,CRKL,LRRC15,FRMD5,CAP1,DYNC1H1,CDC42BPB,NEK10,EPHB3,CHRD,MYD88,ULK4,CNTN4,CACNA1D,SEMA3F,DAG1,KIF6,SRF,DDR1,DSP,DLG2,CFL1,CORO1B,PRKG1,DCC,CCBE1,EMP2,PLA2G10,MAPK3,MAZ,CL…
GO:CC	transporter complex	GO:1990351	0.0282235	1.54939	215	774	26	14438	GRID2,KCNIP4,HSPA2,KCNQ5,KCNQ3,ATP1B2,GRIN2C,CACNB2,GABRG3,SCN11A,CACNA1D,KCNMB3,KCNQ1,TTYH3,RYR2,GLRA2,KCND1,ATP1B4,SCN3A,KCNJ3,CACNB3,GRIN2B,LRRC8C,ABCB8,AMIGO1,ATP1A1
GO:BP	protein localization to cell periphery	GO:1990778	0.0299137	1.52413	210	776	27	14723	GAK,MMP14,ARF6,ITGA3,JUP,SLC4A1,GRIN2C,SLC9A3R1,CLSTN1,SNAP25,LAMA5,NUMA1,ZDHHC5,LRRC15,GORASP1,DAG1,DLG2,EMP2,PID1,EPHA2,SEC16A,EHD3,GRIP1,LRP1,GGA1,TSPAN33,PIK3R2
GO:BP	neuron development	GO:0048666	0.0300848	1.52165	651	776	60	14723	CYFIP2,COL25A1,UNC5C,GRID2,GAK,ARF6,CSMD3,KLHL1,CRABP2,GIT1,ATP1B2,PPP1R9B,NGFR,ERBB2,FZD2,SLC9A3R1,MARK1,DVL1,SNAP25,PAK4,MEGF8,SLC1A3,CTNND2,RAB35,PLA2G3,SEMA7A,EPHB3,GORASP1,ULK4,CNTN4,SEMA3G,SEMA3F,DAG1,SRF,HSP90AB1,DDR1,PRKG1,PDE6C,DCC,PLA2G10,NYAP1,TRIM67,RET,UNC5B,OPHN1,EFNB1,PTPRF,SH3GL2,ZNF804A,NYAP2,ITM2C,SYT1,PPFIA2,GRIP1,SEMA3A,AMIGO1,CAMSAP3,FSTL4,SPOCK1,GFRA3
GO:BP	biological adhesion	GO:0022610	0.0317366	1.49844	843	776	73	14723	CYFIP2,GRID2,BLOC1S4,TYRO3,ACTN1,CITED2,SHC1,ZBTB7B,BCAS3,ATP1B2,ITGA3,ERBB2,JUP,ACTG1,C1QTNF1,LGALS3BP,CLSTN1,PRKCQ,LAMA5,NCAM2,ADGRG1,BCAM,FUT1,JAML,HHLA2,PDE3B,CTNND2,CRKL,LRRC15,FRMD5,EPHB3,CHRD,CNTN4,STAB1,SRF,HSP90AB1,DDR1,DSP,FAT3,PRKG1,CLSTN2,CDH20,EMP2,EPHB4,RET,CTNNA3,SPOCK2,DLC1,ARHGAP6,VSIG4,TFE3,EFNB1,EDA,PTPRF,PTPRD,HOXD3,TNFAIP6,FZD7,EPHA2,COL5A1,RHOB,EMILIN1,CTNNA2,LOC101102230,EP…
GO:MF	ion channel activity	GO:0005216	0.0356871	1.44749	358	793	37	14850	GRID2,KCNQ5,KCNQ3,NALCN,ASIC2,P2RX5,GRIN2C,KCNT2,SNAP25,CACNB2,GRIK1,TRPC6,SLC9C1,GRIA2,GABRG3,SCN11A,CACNA2D3,CACNA1D,KCNMB3,KCNMB2,KCNQ1,CLDN4,TTYH3,RYR2,GLRA2,CLCN5,KCND1,TRPM3,SLC24A2,SCN3A,KCNH7,KCNJ3,CACNB3,GRIN2B,LRRC8C,TRPV6,ANO8
GO:CC	glutamatergic synapse	GO:0098978	0.036209	1.44118	206	774	25	14438	GRID2,ACTN1,GRM1,GRIN2C,CLSTN1,DVL1,PLCB4,SNAP25,CADPS,ERC2,SEMA3F,DLG2,SORCS3,CLSTN2,NRG1,OPHN1,ATP2B3,IL1RAPL2,PTPRD,ERBB4,SYT1,GRIP1,DGKB,GRM3,DGKI
GO:BP	tissue development	GO:0009888	0.0403867	1.39376	1233	776	98	14723	FAM172A,BDH2,UNC5C,MSX1,LDB2,MMP14,SALL2,ZNF219,ZFP36L1,CITED2,ZFPM2,LMNA,MEF2D,DVL2,TP53,KDM6B,ALOX15B,ITGA3,DLX3,NGFR,HOXB2,THRA,KAT2A,FZD2,FASN,ACTG1,SLC9A3R1,DVL1,NPHS2,LAMA5,MMP15,DYRK1B,MEGF8,GSK3A,MYH14,BCL9L,SOX6,TPP1,NUMA1,FGF10,HEYL,MYCL,CRYGS,CHRD,MYD88,SEMA3F,DAG1,USP19,SPDEF,SRF,DDR1,DSP,ST14,OVOL1,CFL1,LZTS2,DNASE1L2,PLA2G10,MAPK3,RYR2,RET,CSMD1,NRG1,OPHN1,EFNB1,EDA,BGN,GPC1,HOXD3,D…
GO:CC	cortical cytoskeleton	GO:0030863	0.0432611	1.3639	55	774	11	14438	SPTB,LLGL1,PPP1R9B,SLC4A1,NUMA1,CAP1,LANCL2,CFL1,DLC1,PPP1R9A,FCHSD1
GO:MF	phospholipase C activity	GO:0004629	0.0444933	1.35171	16	793	6	14850	PLCH2,PLCB1,PLCB4,PLCH1,PLCL1,PLCD4
GO:MF	phosphatidylinositol phospholipase C activity	GO:0004435	0.0444933	1.35171	16	793	6	14850	PLCH2,PLCB1,PLCB4,PLCH1,PLCL1,PLCD4
GO:CC	cortical actin cytoskeleton	GO:0030864	0.0450029	1.34676	38	774	9	14438	SPTB,LLGL1,PPP1R9B,CAP1,LANCL2,CFL1,DLC1,PPP1R9A,FCHSD1
KEGG	cGMP-PKG signaling pathway	KEGG:04022	0.0479871	1.31888	139	384	19	6560	MEF2D,ATP1B2,PLCB1,PLCB4,ADRA1D,MYLK3,TRPC6,GUCY1A2,PDE3B,CACNA1D,KCNMB2,SRF,PRKG1,MAPK3,ATP2B3,ATP1B4,PDE3A,GNA11,ATP1A1
