# Supplementary material for: Transcriptome Analysis Reveals Candidate Genes Regulating the Skin and Hair Diversity of Xinji Fine-Wool Sheep and Tan Sheep
Source: MDPI journal article supplement (doi:10.3390/agriculture12010015), 2021-12-23
Supplement: s1 [file s1 › Supplementary Table S13.xls]

## Sheet: Sheet1
Table S13 | The qPCR nine candidate genes for hair follicle development.
		GAPDH	CDSN	△CT	△△CT	2-△△CT	Mean	SEM	P
12-m-XFWS vs. 12-m-TS	12-month-old Xinji fine wool sheep	22.7013	23.9666	1.26528	-1.8904	3.70738	4.44965	1.36795	0.0276816
		22.5543	25.1654	2.61108	-0.544596	1.45861
		22.6735	23.0743	0.400881	-2.7548	6.74959
		22.7643	23.3634	0.599126	-2.55655	5.88301
	12-month-old Tan sheep	18.4654	21.6427	3.17733	0.0216468	0.985108	1.01449	0.109986
		18.7943	21.6984	2.90407	-0.251614	1.19054
		18.4133	21.9666	3.55324	0.397557	0.759143
		18.9162	21.9042	2.98809	-0.167589	1.12318
		GAPDH	LAMA5	△CT	△△CT	2-△△CT	Mean	SEM	P
	12-month-old Xinji fine wool sheep	22.4231	25.9048	3.48168	-2.27833	4.85116	6.24881	0.999242	0.00116653
		22.3256	24.9946	2.66898	-3.09104	8.52108
		22.549	26.0018	3.45283	-2.30719	4.94917
		22.5064	25.5279	3.0215	-2.73852	6.67384
	12-month-old Tan sheep	18.5901	24.6241	6.03394	0.273924	0.827067	1.06476	0.2684
		18.5654	24.3349	5.76944	0.0094249	0.993488
		18.649	23.6113	4.96226	-0.797752	1.73839
		18.5064	24.7808	6.27442	0.514403	0.700083
		GAPDH	SRF	△CT	△△CT	2-△△CT	Mean	SEM	P
	12-month-old Xinji fine wool sheep	22.7013	25.9918	3.29049	-1.96221	3.89657	4.72775	0.561727	0.000746666
		22.5543	25.4576	2.90324	-2.34945	5.0963
		22.6735	25.9324	3.25891	-1.99379	3.98281
		22.7643	25.4477	2.68337	-2.56933	5.93532
	12-month-old Tan sheep	18.4654	24.1245	5.65909	0.406399	0.754504	1.10539	0.354271
		18.7943	23.0502	4.2559	-0.996795	1.99556
		18.4133	23.636	5.22271	-0.0299867	1.021
		18.9162	24.7892	5.87308	0.620382	0.650499
		GAPDH	NGFR	△CT	△△CT	2-△△CT	Mean	SEM	P
	12-month-old Xinji fine wool sheep	22.4231	25.4271	3.00401	-2.756	6.7552	6.23793	0.428577	2.22436e-05
		22.3256	25.3654	3.03977	-2.72024	6.58982
		22.549	25.9477	3.39866	-2.36135	5.13852
		22.5064	25.5731	3.06665	-2.69336	6.46817
	12-month-old Tan sheep	18.5901	24.6241	6.03394	0.273924	0.827067	1.06476	0.2684
		18.5654	24.3349	5.76944	0.0094249	0.993488
		18.649	23.6113	4.96226	-0.797752	1.73839
		18.5064	24.7808	6.27442	0.514403	0.700083
		GAPDH	OVOL1	△CT	△△CT	2-△△CT	Mean	SEM	P
	12-month-old Xinji fine wool sheep	22.5301	25.5271	2.99701	-1.91845	3.78016	3.31645	0.118462	0.0251554
		22.5255	25.6881	3.16252	-1.75294	3.37045
		22.749	26.2027	3.45374	-1.46172	2.75437
		22.3064	25.4731	3.16665	-1.74881	3.3608
	12-month-old Tan sheep	17.3654	24.1241	6.75864	1.84318	0.278706	1.4362	0.193599
		18.9943	22.9349	3.94058	-0.974879	1.96548
		19.2133	22.6113	3.39793	-1.51753	2.86301
		19.4162	24.9808	5.56469	0.649227	0.637622
		GAPDH	KDF1	△CT	△△CT	2-△△CT	Mean	SEM	P
	12-month-old Xinji fine wool sheep	22.5701	21.1517	-1.41839	-1.56478	2.95833	3.14275	0.11921	0.00316416
		22.7255	21.2894	-1.43614	-1.58253	2.99494
		22.8481	21.3087	-1.53936	-1.68575	3.21708
		22.7064	21.087	-1.61943	-1.76581	3.40066
	12-month-old Tan sheep	18.3654	19.7526	1.38714	1.24075	0.423151	1.20762	0.455236
		18.9943	19.6336	0.639297	0.492908	0.710591
		19.4133	18.9302	-0.483142	-0.629531	1.54706
		19.8162	18.8584	-0.957743	-1.10413	2.1497
		GAPDH	HOXC13	△CT	△△CT	2-△△CT	Mean	SEM	P
	12-month-old Xinji fine wool sheep	22.5701	24.931	2.36085	-0.970745	1.95985	3.31776	0.853045	0.0341341
		22.7255	24.3935	1.66792	-1.66367	3.16821
		22.8481	24.7256	1.87751	-1.45409	2.73983
		22.7064	23.6042	0.897789	-2.4338	5.40316
	12-month-old Tan sheep	18.3654	22.8015	4.43604	1.10445	0.465081	1.13045	0.357095
		18.9943	22.3278	3.33347	0.00187387	0.998702
		19.4133	21.7748	2.36143	-0.970158	1.95906
		19.8162	23.0116	3.19543	-0.136161	1.09898
		GAPDH	SMO	△CT	△△CT	2-△△CT	Mean	SEM	P
	12-month-old Xinji fine wool sheep	22.5301	26.4048	3.87468	-2.38797	5.23419	7.31061	0.920506	0.00117778
		22.5255	25.9946	3.46907	-2.79359	6.93351
		22.749	25.9668	3.21783	-3.04482	8.25246
		22.3064	25.4279	3.1215	-3.14115	8.8223
	12-month-old Tan sheep	17.3654	25.2564	7.89097	1.62832	0.323465	1.50139	0.841366
		18.9943	24.5521	5.55778	-0.704871	1.63
		19.2133	23.6637	4.45033	-1.81232	3.51207
		19.4162	26.5677	7.15152	0.888873	0.540036
		GAPDH	DCHR24	△CT	△△CT	2-△△CT	Mean	SEM	P
	12-month-old Xinji fine wool sheep	22.5231	22.6677	0.144552	-2.51725	5.7249	5.64207	0.0790912	9.18498e-10
		22.4126	22.631	0.218412	-2.44339	5.43918
		22.449	22.5935	0.14447	-2.51733	5.72522
		22.4694	22.6256	0.156174	-2.50563	5.67896
	12-month-old Tan sheep	18.4428	21.0972	2.65437	-0.00743049	1.00516	1.0007	0.0247086
		18.5012	21.2538	2.75256	0.0907577	0.939029
		18.713	21.3273	2.61431	-0.0474898	1.03347
		18.4912	21.1172	2.62596	-0.0358375	1.02515
12-m-XFWS vs. 3-m-XFWS		GAPDH	CDSN	△CT	△△CT	2-△△CT	Mean	SEM	P
	12-month-old Xinji fine wool sheep	22.7013	23.9666	1.26528	-2.40675	5.30277	6.36445	1.95661	0.00994922
		22.5543	25.1654	2.61108	-1.06094	2.08629
		22.6735	23.0743	0.400881	-3.27114	9.65412
		22.7643	23.3634	0.599126	-3.0729	8.41463
	3-month-old Xinji fine wool sheep	21.2168	25.9552	4.7384	1.06637	0.477517	1.09808	0.278513
		21.5325	24.7262	3.19379	-0.478237	1.39304
		21.5279	24.563	3.03511	-0.636919	1.555
		21.2133	24.9341	3.72081	0.0487811	0.966753
		GAPDH	LAMA5	△CT	△△CT	2-△△CT	Mean	SEM	P
	12-month-old Xinji fine wool sheep	22.4231	25.9048	3.48168	-0.501666	1.41585	1.82376	0.999242	0.0203402
		22.3256	24.9946	2.66898	-1.31437	2.48694
		22.549	26.0018	3.45283	-0.530522	1.44445
		22.5064	25.5279	3.0215	-0.961853	1.94781
	3-month-old Xinji fine wool sheep	21.2168	25.1507	3.93391	-0.0494355	1.03486	1.00685	0.0762115
		21.533	25.4808	3.94788	-0.0354684	1.02489
		21.4224	25.214	3.79167	-0.191683	1.14209
		21.6434	25.9034	4.25994	0.276586	0.825542
		GAPDH	SRF	△CT	△△CT	2-△△CT	Mean	SEM	P
	12-month-old Xinji fine wool sheep	22.7013	25.9918	3.29049	-0.853863	1.80733	2.19286	0.260544	0.00466875
		22.5543	25.4576	2.90324	-1.24111	2.3638
		22.6735	25.9324	3.25891	-0.885444	1.84733
		22.7643	25.4477	2.68337	-1.46098	2.75296
	3-month-old Xinji fine wool sheep	21.2168	25.9385	4.72173	0.577376	0.670182	1.03121	0.160957
		21.5325	25.4415	3.90906	-0.235285	1.17714
		21.5279	25.7193	4.19142	0.0470695	0.9679
		21.2133	24.9685	3.75519	-0.38916	1.30963
		GAPDH	NGFR	△CT	△△CT	2-△△CT	Mean	SEM	P
	12-month-old Xinji fine wool sheep	22.4231	25.4271	3.00401	-0.904334	1.87168	1.72836	0.118747	0.00183984
		22.3256	25.3654	3.03977	-0.868576	1.82586
		22.549	25.9477	3.39866	-0.509689	1.42374
		22.5064	25.5731	3.06665	-0.841695	1.79215
	3-month-old Xinji fine wool sheep	21.2168	25.1507	3.93391	0.0255645	0.982436	1.01207	0.101516
		21.533	25.1808	3.64788	-0.260468	1.19787
		21.4224	25.214	3.79167	-0.116683	1.08424
		21.6434	25.9034	4.25994	0.351586	0.783722
		GAPDH	OVOL1	△CT	△△CT	2-△△CT	Mean	SEM	P
	12-month-old Xinji fine wool sheep	22.5301	25.5271	2.99701	-1.26186	2.39804	2.10388	0.15479	0.00567341
		22.5255	25.6881	3.16252	-1.09635	2.13814
		22.749	26.2027	3.45374	-0.805135	1.74731
		22.3064	25.4731	3.16665	-1.09222	2.13202
	3-month-old Xinji fine wool sheep	21.1168	25.1241	4.00724	-0.25163	1.19055	1.07437	0.236807
		21.833	25.9349	4.10192	-0.156957	1.11493
		21.9224	25.6113	3.6889	-0.569969	1.48449
		21.7434	26.9808	5.23743	0.978556	0.507487
		GAPDH	KDF1	△CT	△△CT	2-△△CT	Mean	SEM	P
	12-month-old Xinji fine wool sheep	22.5701	21.1517	-1.41839	-1.95579	3.87929	4.12112	0.156321	6.90069e-07
		22.7255	21.2894	-1.43614	-1.97354	3.9273
		22.8481	21.3087	-1.53936	-2.07676	4.21859
		22.7064	21.087	-1.61943	-2.15682	4.45931
	3-month-old Xinji fine wool sheep	21.1168	21.5029	0.386068	-0.151328	1.11059	1.00467	0.0631869
		21.633	22.1681	0.535194	-0.00220308	1.00153
		21.7224	22.1868	0.464484	-0.0729123	1.05184
		21.4133	22.1772	0.76384	0.226444	0.854739
		GAPDH	HOXC13	△CT	△△CT	2-△△CT	Mean	SEM	P
	12-month-old Xinji fine wool sheep	22.5701	24.931	2.36085	-0.568651	1.48314	2.51075	0.645549	0.0424431
		22.7255	24.3935	1.66792	-1.26157	2.39757
		22.8481	24.7256	1.87751	-1.05199	2.07339
		22.7064	23.6042	0.897789	-2.03171	4.08889
	3-month-old Xinji fine wool sheep	21.1168	24.0997	2.9829	0.0534017	0.963661	1.02778	0.166952
		21.633	24.9538	3.32084	0.391339	0.762422
		21.7224	24.7327	3.01038	0.0808801	0.945481
		21.4133	23.8172	2.40388	-0.525621	1.43955
		GAPDH	SMO	△CT	△△CT	2-△△CT	Mean	SEM	P
	12-month-old Xinji fine wool sheep	22.5301	26.4048	3.87468	-0.280558	1.21466	1.69653	0.213616	0.0217874
		22.5255	25.9946	3.46907	-0.686176	1.60901
		22.749	25.9668	3.21783	-0.937415	1.91509
		22.3064	25.4279	3.1215	-1.03375	2.04733
	3-month-old Xinji fine wool sheep	21.1168	25.8295	4.71271	0.557468	0.679494	1.02361	0.1349
		21.833	25.835	4.00203	-0.153208	1.11204
		21.9224	25.9373	4.01491	-0.140328	1.10216
		21.7434	25.6347	3.89131	-0.263932	1.20075
		GAPDH	DCHR24	△CT	△△CT	2-△△CT	Mean	SEM	P
	12-month-old Xinji fine wool sheep	22.5231	22.6677	0.144552	-1.13045	2.18927	2.1576	0.0302455	0.00013043
		22.4126	22.631	0.218412	-1.05659	2.08001
		22.449	22.5935	0.14447	-1.13053	2.1894
		22.4694	22.6256	0.156174	-1.11883	2.17171
	3-month-old Xinji fine wool sheep	21.2168	22.8015	1.58464	0.309632	0.806848	1.02175	0.148337
		21.533	22.3278	0.794799	-0.480204	1.39494
		21.4224	22.7748	1.35241	0.0774043	0.947761
		21.6434	23.0116	1.36817	0.0931682	0.937462
