# Supplementary material for: Transcriptome Analysis Reveals Candidate Genes Regulating the Skin and Hair Diversity of Xinji Fine-Wool Sheep and Tan Sheep
Source: MDPI journal article supplement (doi:10.3390/agriculture12010015), 2021-12-23
Supplement: s1 [file s1 › Supplementary Table S14.xls]

## Sheet: Sheet1
Table S14 | Differentially expressed TFs between 12-m-XFWS and 12-m-TS.
TFs	Family	log2FoldChange	padj
MSX1	Homeobox	2.24575	9.19e-05
HOMEZ	Homeobox	1.23642	3.94e-05
SALL2	zf-C2H2	2.28735	7.58e-05
TOX4	HMG	1.11848	7.67e-06
ZNF219	zf-C2H2	1.11607	0.000451137
MEIS2	Homeobox	-1.55352	0.00926798
ZNF687	zf-C2H2	1.44528	9.7e-07
PROX2	HPD	-1.73054	0.00125259
FOS	TF_bZIP	-3.11399	0.00230235
NR2E1	RXR-like	-1.3248	0.00145386
LIN28B	CSD	-5.60509	0.00271205
SNAI2	zf-C2H2	1.17589	0.00886098
ST18	zf-C2HC	-2.20294	0.000899366
ZBTB7B	ZBTB	2.14892	4.83e-08
HNF4G	RXR-like	-2.97451	0.00181273
ZFHX4	Homeobox	-1.46499	1.7e-05
TRPS1	zf-GATA	-1.78997	0.00444046
ZFPM2	zf-C2H2	-2.7053	1.07e-05
FOXO1	Fork_head	1.18268	0.00034388
MEF2D	SRF	1.09209	6.89e-06
TBX4	T-box	-6.53129	1.12e-05
RAB11FIP4	TF_bZIP	1.64487	9.85e-07
TP53	P53	1.44949	3.68e-07
CHD3	HMG	1.65414	7.84e-06
SREBF1	bHLH	1.54385	7.56e-07
DLX3	Homeobox	2.24565	0.000266053
DLX4	Homeobox	1.59928	0.000735622
HOXB2	Homeobox	2.08563	0.000559614
NFE2L1	TF_bZIP	1.76173	0.00469519
THRA	THR-like	2.3179	1.71e-10
PRDM16	zf-C2H2	-1.27912	0.00269133
SAMD11	SAND	1.89377	0.00265672
CREM	TF_bZIP	-1.26162	9.44e-05
ZNF512B	zf-C2H2	2.93286	8.66e-12
ZBTB46	ZBTB	-1.06253	0.00756119
TCF25	Others	1.05109	0.00377534
IRX5	Homeobox	1.15182	0.000180739
ZNF319	zf-C2H2	2.00174	2.87e-05
ZNF536	zf-C2H2	-1.81864	0.000382975
CIC	HMG	1.60622	1.38e-12
ERF	ETS	1.64267	4.79e-06
FOSB	TF_bZIP	-3.18572	0.00860276
FIZ1	zf-C2H2	1.25862	1.79e-10
SOX6	HMG	-2.24797	0.00227812
MSX2	Homeobox	2.18056	6.05e-10
ZNF664	zf-C2H2	1.04602	0.000340822
HEYL	bHLH	1.3783	0.00602747
PATZ1	ZBTB	1.0916	0.0078958
MYCL	bHLH	1.65179	0.00951087
ZBTB47	ZBTB	1.67392	5.92e-10
ZBTB22	ZBTB	1.86138	2.57e-09
SPDEF	ETS	1.60439	0.00832137
SRF	SRF	1.51162	2.86e-09
PBX2	Homeobox	1.66691	5.83e-15
ZFP57	zf-C2H2	1.63777	0.00139423
MECOM	zf-C2H2	-1.97165	0.00259599
PKNOX2	Homeobox	-1.45939	0.00902786
FLI1	ETS	-1.28515	0.00310035
MTA2	zf-GATA	1.18304	0.00510541
ZBTB3	ZBTB	2.88514	8.09e-06
OVOL1	zf-C2H2	1.79767	4.5e-08
ZIC1	zf-C2H2	5.12776	5.76e-11
ZIC4	zf-C2H2	3.46226	0.00177896
EBF3	COE	-1.81842	0.00125994
TFDP2	E2F	-1.504	0.000661466
TFAP4	bHLH	1.40848	0.000428914
MAZ	zf-C2H2	1.78662	6.78e-10
ZNF646	zf-C2H2	1.66519	3.28e-05
FOXK1	Fork_head	1.31779	1.37e-05
ZBED1	zf-BED	2.06918	2.35e-11
KLF8	zf-C2H2	-2.57746	8.77e-11
TFE3	bHLH	1.50668	7.47e-06
ELK1	ETS	1.00501	6.32e-06
AFF2	AF-4	-2.10204	0.000141077
NR4A3	NGFIB-like	-3.72292	2.15e-07
GLIS3	zf-C2H2	-2.3957	0.000500942
HOXD3	Homeobox	-1.74507	0.00181273
DLX2	Homeobox	1.72747	2.94e-05
CSRNP3	CSRNP_N	-2.74445	0.000312651
NR4A2	NGFIB-like	-2.50509	0.00058931
E2F2	E2F	1.05139	0.00264702
LHX2	Homeobox	1.02116	0.000978072
FOXI3	Fork_head	1.85302	0.000408865
LHX8	Homeobox	2.77563	0.00180278
ZNF385A	zf-C2H2	1.28575	6.24e-08
HOXC10	Homeobox	-3.30577	8.07e-09
HOXC11	Homeobox	-3.51711	1.39e-07
HOXC13	Homeobox	1.64953	0.000502888
RARG	THR-like	1.36445	0.00246262
NR4A1	NGFIB-like	-2.67079	2.51e-05
STAT6	STAT	1.02324	0.00838429
FOXM1	Fork_head	1.80219	1.85e-06
MAFF	TF_bZIP	1.78049	0.00428967
TEF	TF_bZIP	1.26568	8e-06
CSDC2	CSD	2.74302	3.59e-09
SREBF2	bHLH	1.43216	7.43e-09
TFEC	bHLH	-1.94805	0.00137944
HOXA10	Homeobox	-7.6163	1.97e-10
ZMIZ2	zf-MIZ	1.33845	5.5e-05
POU6F2	Pou	-2.16816	0.00745733
ALX3	Homeobox	1.98236	8.83e-05
CC2D1A	Others	1.21554	0.000306172
RFX2	RFX	-1.60302	0.00847448
ZBTB7A	ZBTB	1.5834	0.00418843
PRDM6	zf-C2H2	-1.27962	0.00543331
ZNF354A	zf-C2H2	-1.25015	0.00129199
ARID3A	ARID	1.23402	3.13e-05
PITX1	Homeobox	-2.71645	0.00499862
