# Supplementary material for: Transcriptome Analysis Reveals Candidate Genes Regulating the Skin and Hair Diversity of Xinji Fine-Wool Sheep and Tan Sheep
Source: MDPI journal article supplement (doi:10.3390/agriculture12010015), 2021-12-23
Supplement: s1 [file s1 › Supplementary Table S15.xls]

## Sheet: Sheet1
Table S15 | Differentially expressed TFs between 12-m-XFWS and 3-m-XFWS.
TFs	Family	log2FoldChange	padj
ZNF300	zf-C2H2	-1.082	0.00438164
PRDM5	zf-C2H2	-1.37117	5.21072e-05
LCORL	HTH	-1.96471	1.50563e-09
MSX1	Homeobox	1.2156	8.38967e-09
NFATC4	RHD	1.07825	0.00012397
SALL2	zf-C2H2	1.54134	3.47662e-05
ZNF219	zf-C2H2	1.01144	7.99251e-06
MEIS2	Homeobox	-1.70123	7.94013e-09
RORA	THR-like	-1.87537	1.51015e-14
TCF12	bHLH	-1.54624	5.87245e-11
ZNF687	zf-C2H2	1.48908	2.86738e-10
ZBTB25	ZBTB	-1.11263	0.000112768
BACH2	TF_bZIP	-1.0967	9.11809e-06
ZNF292	zf-C2H2	-1.11199	2.24463e-05
HIVEP2	zf-C2H2	-1.13329	7.91817e-07
PLAG1	zf-C2H2	-1.5792	8.15449e-06
TOX	HMG	-1.66299	3.41434e-08
ZBTB7B	ZBTB	1.64031	1.40692e-12
MSC	bHLH	2.62561	0.000111039
ZNF704	Others	-1.96348	6.6318e-10
TRPS1	zf-GATA	-1.85255	5.02438e-16
ZFPM2	zf-C2H2	-1.32239	2.39052e-05
FOXO1	Fork_head	1.16987	1.32793e-07
MEF2D	SRF	1.33572	9.02812e-08
KLF12	zf-C2H2	-1.68652	1.40409e-07
RAB11FIP4	TF_bZIP	1.33901	6.81284e-06
FOXN1	Fork_head	1.82559	8.17503e-20
TP53	P53	1.30473	3.58772e-07
CHD3	HMG	1.57945	8.65508e-12
SREBF1	bHLH	1.71559	4.47722e-12
DLX3	Homeobox	1.86714	2.61682e-19
DLX4	Homeobox	1.02234	3.5991e-06
HOXB2	Homeobox	1.02237	0.000893024
NFE2L1	TF_bZIP	1.61818	1.28737e-10
THRA	THR-like	1.48745	8.12766e-10
NR1D1	THR-like	1.01365	0.000334669
UBTF	HMG	1.11136	9.29721e-08
ESRRG	ESR-like	-2.41131	2.04164e-07
PBX1	Homeobox	-1.18069	8.07669e-05
SAMD11	SAND	1.22448	3.10288e-07
ATF3	TF_bZIP	1.03273	0.000126061
ELF3	ETS	1.46534	1.32129e-05
PAX1	PAX	3.03665	0.000692212
PAXBP1	GCFC	-1.33056	4.44477e-06
ZNF512B	zf-C2H2	1.9527	5.6549e-07
ZGPAT	Others	1.36072	5.54875e-08
ZNF831	zf-C2H2	-1.72719	0.00140879
TOX2	HMG	-1.36656	6.01902e-05
ZNF335	zf-C2H2	1.33719	2.09266e-09
ZFP1	zf-C2H2	-1.06795	0.000118311
TCF25	Others	1.40936	1.11176e-06
IRX3	Homeobox	1.0791	0.00241807
ZNF319	zf-C2H2	1.38879	0.000862952
E2F4	E2F	1.24072	3.03994e-07
NFAT5	RHD	-1.04198	8.61499e-05
ZNF536	zf-C2H2	-1.46483	0.00120455
USF2	bHLH	1.13019	3.72249e-06
ZNF567	zf-C2H2	-1.30531	4.11917e-07
ZNF461	zf-C2H2	-1.72286	9.48651e-09
ZNF382	zf-C2H2	-1.16814	3.51687e-05
ZNF654	zf-C2H2	-1.19766	6.98418e-07
CIC	HMG	1.56314	2.15995e-09
ERF	ETS	1.44084	1.832e-09
ZNF526	zf-C2H2	1.53468	1.06804e-07
ZNF296	zf-C2H2	1.36778	3.27941e-05
FOSB	TF_bZIP	2.0216	0.00954675
NR1H2	THR-like	1.28055	4.66345e-08
ZNF175	zf-C2H2	-1.01154	0.000117887
FIZ1	zf-C2H2	1.06923	1.44444e-05
SOX6	HMG	-1.51653	3.25901e-06
ZNF214	zf-C2H2	-1.00027	1.33328e-05
ALX4	Homeobox	-1.03602	0.00393887
ZBTB20	ZBTB	-1.26808	7.4526e-06
CREB3L1	TF_bZIP	1.41148	7.2067e-05
ZNF408	zf-C2H2	1.10659	1.6931e-05
SSRP1	HMG	1.65313	1.69938e-11
FOXI1	Fork_head	2.58633	0.00916481
MSX2	Homeobox	1.20952	8.96683e-08
ZNF605	zf-C2H2	-1.08709	9.48055e-05
HEYL	bHLH	1.35395	6.69304e-12
ARNT2	bHLH	-1.08222	0.00356806
TP63	P53	-1.05281	4.36264e-08
MYCL	bHLH	1.26748	1.56747e-06
PAX9	PAX	1.07034	0.00406449
FOXA1	Fork_head	1.73883	3.89377e-08
ZBTB47	ZBTB	1.52632	7.21302e-07
RLF	zf-C2H2	-1.3417	2.54344e-07
BHLHE40	bHLH	1.45187	5.03121e-08
MITF	bHLH	-1.19935	6.80636e-09
LTF	Others	2.11178	0.00787197
PPARG	THR-like	-1.2521	6.30236e-05
RXRB	RXR-like	1.28472	4.39181e-07
ZBTB22	ZBTB	1.66004	3.17915e-07
SPDEF	ETS	2.43925	2.18138e-12
SRF	SRF	1.36213	1.90542e-07
RUNX2	Runt	-1.60718	2.27272e-08
PBX2	Homeobox	1.05572	1.13817e-05
ATF6B	TF_bZIP	1.41705	5.99876e-10
TCF19	Others	1.3945	9.45887e-07
MECOM	zf-C2H2	-1.30919	4.16701e-08
ZKSCAN8	zf-C2H2	-1.05041	9.86157e-07
E2F3	E2F	-1.08549	2.18226e-06
PKNOX2	Homeobox	-1.29029	5.84207e-05
MTA2	zf-GATA	1.22839	5.49007e-07
ZBTB3	ZBTB	1.58844	0.00362264
RELA	RHD	1.4693	1.18058e-08
OVOL1	zf-C2H2	1.54745	1.39095e-06
TCF7L2	HMG	-1.23842	2.35865e-05
EBF3	COE	-1.06893	0.0015476
ZNF516	zf-C2H2	-1.00499	4.45719e-05
ZNF407	zf-C2H2	-1.06868	0.00021505
TFDP2	E2F	-1.55184	3.08264e-10
ZNF521	zf-C2H2	-1.13229	0.000830503
SETBP1	Others	-1.6676	9.74299e-09
CAPN15	Others	1.37302	0.000129306
SOX8	HMG	1.43168	0.00326272
E4F1	zf-C2H2	1.13889	1.78735e-06
ZNF174	zf-C2H2	1.29839	9.57709e-08
CARHSP1	CSD	1.00629	0.00166922
MAZ	zf-C2H2	1.4502	5.1764e-08
ZNF768	zf-C2H2	1.39577	9.06767e-09
ZNF668	zf-C2H2	1.09638	0.000100959
ZNF646	zf-C2H2	1.55927	3.1753e-10
TSC22D4	TSC22	1.11641	5.45351e-05
FOXK1	Fork_head	1.23065	1.14906e-05
ZBED1	zf-BED	1.63685	3.45307e-09
ZNF691	zf-C2H2	1.41493	5.86142e-07
KLF8	zf-C2H2	-2.33428	2.23287e-14
TFE3	bHLH	1.05195	0.000463519
ZNF182	zf-C2H2	-1.35813	8.31013e-06
AR	ESR-like	-1.48494	5.72962e-09
HDX	Homeobox	-2.41519	3.10944e-11
ZNF711	zf-C2H2	-1.39518	9.06767e-09
ZNF618	zf-C2H2	-1.3918	2.42637e-07
KLF4	zf-C2H2	1.32084	1.14144e-09
ZNF169	zf-C2H2	-1.08644	0.000470818
FOXE1	Fork_head	1.28268	3.212e-06
RFX3	RFX	-1.59727	9.54462e-09
GLIS3	zf-C2H2	-1.33394	0.000454007
NFIB	CTF/NFI	-1.4246	3.79711e-09
BNC2	zf-C2H2	-2.01946	5.50345e-09
HMBOX1	Homeobox	-1.00033	0.000326917
HOXD3	Homeobox	-1.10774	0.0099399
FOXD2	Fork_head	1.39863	0.002377
DLX2	Homeobox	1.04173	0.000544394
CSRNP3	CSRNP_N	-2.09721	0.00764749
BAZ2B	MBD	-1.304	1.64411e-07
ZEB2	zf-C2H2	-1.0133	0.0012929
IKZF2	zf-C2H2	-1.04978	0.000597431
GLIS1	zf-C2H2	-1.2244	0.000324029
ID3	bHLH	1.10409	2.5943e-05
JUN	TF_bZIP	1.66736	5.16328e-09
CIZ1	Others	1.34397	6.32351e-09
PBX3	Homeobox	-1.33497	2.07812e-06
OSR1	zf-C2H2	1.4191	2.40086e-05
MEIS1	Homeobox	-1.46981	1.59314e-07
GCFC2	GCFC	-1.24379	1.25211e-07
BCL11A	zf-C2H2	-1.02386	5.03798e-05
MTA3	zf-GATA	-1.2012	2.4277e-06
MIER1	MYB	-1.24554	2.25731e-07
NPAS2	bHLH	-1.17517	3.54751e-07
HOXC13	Homeobox	1.23347	1.85461e-09
NR4A1	NGFIB-like	1.34372	0.000497052
ARID2	ARID	-1.38467	1.2175e-08
STAT6	STAT	1.45117	5.47507e-10
STAT2	STAT	1.05703	0.0018528
SMARCC2	MYB	1.04871	4.61593e-07
RFX4	RFX	-2.09226	0.00654868
SOX5	HMG	-2.31646	1.09187e-09
ETV6	ETS	-1.47674	3.63862e-08
FOXM1	Fork_head	1.00912	0.00392154
ZNF644	zf-C2H2	-1.12254	0.000142739
SOX10	HMG	1.79554	7.72169e-06
MAFF	TF_bZIP	2.26463	5.8968e-12
ATF4	TF_bZIP	1.27991	4.38502e-08
TEF	TF_bZIP	1.33026	2.52191e-09
CSDC2	CSD	2.59451	1.36363e-17
SREBF2	bHLH	1.44331	3.34536e-11
DLX5	Homeobox	1.22593	0.0064333
SP4	zf-C2H2	-1.00559	0.000588368
DMTF1	MYB	-1.20266	3.48685e-07
FOXP2	Fork_head	-1.36489	3.22202e-05
ZNF277	zf-C2H2	-1.31402	1.95967e-05
ZMIZ2	zf-MIZ	1.52267	4.66705e-10
GLI3	zf-C2H2	-1.73027	4.61593e-07
NRF1	Nrf1	-1.24634	2.50345e-06
CC2D1A	Others	1.19434	2.52078e-06
JUNB	TF_bZIP	1.09205	5.54789e-05
ZNF358	zf-C2H2	1.38694	3.89296e-05
ZNF414	Others	1.27661	3.79683e-07
ZBTB7A	ZBTB	1.14055	5.77953e-06
PIAS4	zf-MIZ	1.00805	6.94989e-06
ZNF608	Others	-1.17395	1.00582e-06
ZNF354A	zf-C2H2	-1.38731	1.67398e-08
ARID3A	ARID	1.01465	1.05692e-05
MBD3	MBD	1.37188	4.95387e-07
NR3C1	ESR-like	-1.09587	2.60754e-05
