# Supplementary material for: Transcriptome Analysis Reveals Candidate Genes Regulating the Skin and Hair Diversity of Xinji Fine-Wool Sheep and Tan Sheep
Source: MDPI journal article supplement (doi:10.3390/agriculture12010015), 2021-12-23
Supplement: s1 [file s1 › Supplementary Table S16.xls]

## Sheet: Sheet1
Table S16 | The expression level of 67 overlapped TFs is measured by TPM value.
		12-month-old Xinji fine wool sheep (n=3)			3-month-old Xinji fine wool sheep (n=4)				12-month-old Tan sheep (n=6)
TFs	Family	X1	X2	X3	S1	S2	S3	S4	C1	C2	C3	C4	C5	C6
SALL2	zf-C2H2	1.49337	1.99337	1.6214	0.775186	0.942884	0.464101	0.49556	0.552625	0.538348	0.283885	0.538201	0.18131	0.133601
ZNF219	zf-C2H2	11.4456	13.5255	10.1632	8.70327	6.67068	6.40873	5.29505	8.30284	5.61684	4.04205	7.33145	3.80074	6.75222
MEIS2	Homeobox	9.39834	15.6058	7.32427	36.5821	50.1503	44.4715	26.8926	40.7077	42.0356	4.43666	53.6746	43.2472	37.0714
ZNF687	zf-C2H2	6.48123	9.80738	7.88623	4.71026	3.0573	3.07431	2.4533	3.53245	3.25896	2.31785	4.11414	1.96458	4.07912
ZBTB7B	ZBTB	102.102	107.222	117.555	55.4582	36.783	37.3759	34.5918	37.4961	20.9143	7.92348	54.0693	23.2647	35.0872
TRPS1	zf-GATA	20.02	32.5991	21.3891	88.9098	112.989	111.236	87.1213	98.2325	132.259	10.5473	84.4119	138.511	126.486
ZFPM2	zf-C2H2	3.08193	6.49923	2.82292	8.75625	12.5177	14.3092	9.95492	33.8849	46.6115	2.86275	32.9924	29.7542	41.0081
FOXO1	Fork_head	32.9171	41.5681	37.0869	25.4037	19.496	19.752	12.7524	22.9209	18.3289	11.8616	19.9478	9.63692	27.144
MEF2D	SRF	28.382	40.3118	39.3791	23.7735	15.5389	17.2505	10.374	21.7844	17.023	10.6979	24.1467	12.6909	27.8737
RAB11FIP4	TF_bZIP	7.87131	12.6491	14.8011	8.04602	4.26196	5.39311	3.99445	4.21515	5.5461	1.89239	6.24639	3.09022	4.46687
TP53	P53	93.6757	110.33	103.147	64.2032	51.8689	35.471	40.4104	48.2913	46.6655	28.0647	52.6665	29.8047	40.851
CHD3	HMG	42.2007	59.7714	50.6421	26.2272	21.4742	17.8084	13.3226	19.064	17.8135	15.3664	20.9741	11.5443	16.5502
SREBF1	bHLH	63.5397	68.6907	73.9049	33.5839	26.1139	22.7234	16.3419	25.9308	18.1737	17.7656	41.0082	21.5885	33.9397
DLX3	Homeobox	193.514	227.004	225.889	88.9743	65.2886	63.4486	57.3476	59.8665	46.7223	63.0581	31.2449	22.5797	40.9752
DLX4	Homeobox	9.85999	12.0617	12.1107	6.67307	6.55454	6.36529	6.01618	4.044	4.13202	4.19672	3.59998	2.23443	4.90016
HOXB2	Homeobox	15.3672	15.2015	13.2169	8.40053	9.98351	7.65784	7.25068	1.90479	2.92393	4.48105	5.27535	3.23121	2.80614
NFE2L1	TF_bZIP	112.298	128.138	155.733	66.3551	49.535	40.1373	43.9151	57.7545	42.1459	4.64176	91.1443	41.1194	52.5548
THRA	THR-like	60.5093	82.5603	77.2108	40.7572	28.4244	23.4434	27.6675	25.9003	18.7206	4.29029	22.802	13.8468	18.3151
SAMD11	SAND	41.0841	48.3753	30.2117	24.441	17.1066	22.2575	15.9414	11.2668	10.727	15.3652	9.77065	5.30382	9.57934
ZNF512B	zf-C2H2	5.96267	17.736	11.8685	6.66754	2.57821	2.95087	1.87455	2.55066	1.39558	0.444622	2.91186	1.29255	2.05368
TCF25	Others	92.6002	70.6913	83.8965	40.3137	42.5625	29.47	33.4228	43.5957	41.2487	33.8947	55.1788	40.5013	49.105
ZNF319	zf-C2H2	2.21627	3.11675	4.51653	1.51353	1.92324	1.00797	1.24297	0.535852	1.38807	0.365982	1.36291	0.857058	1.10519
ZNF536	zf-C2H2	0.175816	0.772727	0.519677	1.11681	2.05079	1.21227	1.3335	1.66293	2.0046	0.587925	1.65865	2.04814	3.41248
CIC	HMG	15.2053	25.9654	18.6861	11.9739	6.89146	7.8472	4.68794	8.6719	7.32922	3.71431	9.98147	4.73379	9.61411
ERF	ETS	25.3359	26.8615	21.3538	12.9408	10.8897	9.47163	8.81796	6.50608	9.96974	4.98205	14.7297	5.40573	12.5037
FOSB	TF_bZIP	0.576361	0.975476	4.04424	0.419502	0.214353	1.24899	0.307706	1.99885	12.8599	0.713827	33.7601	53.4774	13.8113
FIZ1	zf-C2H2	9.05692	11.45	9.58514	8.08057	4.67861	5.5863	4.11379	5.11168	4.18973	2.49032	6.3633	4.37999	5.75174
SOX6	HMG	1.96215	2.59071	1.48003	4.66981	8.52755	6.06082	6.43767	13.8079	8.53216	0.606378	16.8378	16.1504	12.9757
MSX2	Homeobox	78.0093	112.891	112.307	67.8735	39.701	49.5996	44.6915	27.5537	35.0473	16.6928	25.1528	15.0512	24.3043
HEYL	bHLH	35.0911	48.5125	41.7527	23.2933	18.8974	19.1223	14.2735	17.2725	16.9581	18.622	13.6417	10.0992	20.7078
MYCL	bHLH	3.81827	5.68965	4.77485	2.26363	2.14725	2.16866	2.32692	1.01764	1.88758	2.05938	1.45713	1.05222	1.13273
ZBTB47	ZBTB	18.7438	24.3521	24.5357	11.8594	11.8899	6.15101	6.22978	7.38752	10.1332	4.10013	11.2449	5.72889	9.10897
ZBTB22	ZBTB	12.2058	11.5158	12.9264	4.32862	4.64478	3.34465	5.31925	4.85296	4.50962	1.70461	3.76174	4.15316	3.96282
SPDEF	ETS	42.6625	50.9911	25.7932	9.29108	12.4059	7.42516	4.84226	12.5821	27.1249	3.71945	26.6054	11.9573	9.1105
SRF	SRF	10.5803	21.3607	15.9151	10.1479	6.73948	6.35965	5.04472	8.43988	6.10305	2.55488	7.63247	4.9493	7.97401
PBX2	Homeobox	61.2062	85.0727	82.7959	53.7126	40.7563	33.4316	40.0078	33.4108	30.4222	13.4477	33.0018	22.4676	28.4792
MECOM	zf-C2H2	11.7665	20.3513	12.9736	36.092	45.26	49.4883	36.1616	70.678	106.205	5.48436	72.8491	62.9929	100.008
PKNOX2	Homeobox	19.6082	36.2662	11.1457	72.3447	54.733	72.8146	46.874	94.7811	79.8807	11.8687	91.3372	68.9326	77.9677
MTA2	zf-GATA	48.4485	76.9001	60.5862	42.9289	31.0811	24.2085	23.1374	34.3006	27.1826	27.3491	32.1851	17.5907	30.3874
ZBTB3	ZBTB	1.40473	2.48083	2.56178	1.70404	0.685689	0.317091	0.639164	0.465674	0.288682	0	0.388731	0.416679	0.548827
OVOL1	zf-C2H2	45.3697	94.6888	82.1751	49.8836	18.1144	27.5343	21.696	31.7333	19.7139	13.9722	32.924	13.3398	28.883
EBF3	COE	4.07065	13.7602	5.62072	21.1717	17.9777	19.0207	13.4468	33.0613	35.4935	4.85247	47.8046	22.1569	46.4887
TFDP2	E2F	12.1612	17.8539	12.1092	38.0409	47.2938	55.1063	45.0609	51.7551	50.0008	9.06315	49.1382	53.4718	65.6109
MAZ	zf-C2H2	82.05	112.104	92.9052	59.582	43.9079	33.2784	26.4462	28.2534	42.3037	14.95	45.2369	23.8854	32.0247
ZNF646	zf-C2H2	4.68169	8.12604	7.33043	3.33656	2.72056	2.34611	1.99388	2.37576	1.99297	2.10913	2.62352	1.38871	2.64522
FOXK1	Fork_head	6.96322	16.3254	12.4795	8.07652	4.75005	6.64366	3.741	7.45962	4.56519	2.5088	6.75973	4.66554	5.4433
ZBED1	zf-BED	17.8624	22.0775	25.1551	10.472	8.57152	5.91212	7.20957	5.25	6.54155	2.01727	8.92457	4.87007	8.92875
KLF8	zf-C2H2	0.83473	1.17474	0.699009	4.61091	6.14511	6.91249	3.28156	6.1121	6.25957	1.40673	8.19207	6.04858	10.3322
TFE3	bHLH	22.3085	47.9126	35.9242	32.059	15.5325	19.1023	12.0623	18.332	12.5024	5.04534	20.8413	8.61093	20.5355
GLIS3	zf-C2H2	1.17079	3.10153	1.72337	4.06549	8.35474	4.63818	4.61336	10.8077	15.6566	0.833768	13.1622	11.1653	22.4843
HOXD3	Homeobox	2.3212	8.7112	2.03191	11.8827	8.4601	13.204	7.23265	12.4066	13.1386	12.8505	21.5829	9.6945	16.9659
DLX2	Homeobox	8.82606	16.8863	14.2	10.2183	7.14085	7.99724	4.46404	5.87546	6.83706	1.5342	5.82757	2.49862	4.76533
CSRNP3	CSRNP_N	0.0110553	0.0658947	0.02765	0.0885123	0.20969	0.221603	0.111068	0.270638	0.444004	0.0739373	0.146848	0.25185	0.287068
HOXC13	Homeobox	112.808	144.312	146.435	81.1425	62.1701	61.532	59.0788	59.2734	42.4936	46.7997	34.5716	36.3463	41.0189
NR4A1	NGFIB-like	1.55321	2.82443	3.60485	1.49456	1.13083	1.69718	0.586463	5.70348	30.0122	5.0863	27.3847	26.2566	19.4822
STAT6	STAT	34.2365	42.7166	43.5806	22.066	18.6976	15.2687	12.3342	27.6926	14.6917	15.2271	34.0233	12.4333	28.8103
FOXM1	Fork_head	3.37361	5.74522	5.10697	4.65247	2.12257	2.63844	1.66198	1.61449	1.28682	1.16865	1.60042	1.55297	1.24413
MAFF	TF_bZIP	13.3021	26.203	32.4162	8.10961	4.37633	5.72823	4.71791	5.42733	12.0162	1.09832	11.8928	5.98944	13.695
TEF	TF_bZIP	194.556	248.996	240.098	120.917	117.063	91.3508	87.129	107.515	85.3789	76.3224	141.824	80.9465	128.808
CSDC2	CSD	44.3919	56.8447	80.8366	15.2214	14.2432	10.8663	6.7438	10.548	12.4451	9.47048	8.41458	6.15004	8.7298
SREBF2	bHLH	130.174	161.354	136.626	86.3633	53.9809	62.3717	43.808	61.4384	48.1267	37.4802	78.212	42.8765	87.4982
ZMIZ2	zf-MIZ	14.2934	16.4971	14.322	8.14969	6.64738	5.84885	3.95503	6.85266	5.66865	5.3159	8.30869	4.48747	7.95666
CC2D1A	Others	13.2877	20.6713	16.1259	12.5403	7.82064	8.23257	5.39126	11.1122	6.00705	4.71838	12.7934	5.58684	7.59026
ZBTB7A	ZBTB	42.396	42.2306	42.3025	32.5533	20.9278	22.8036	15.2717	20.6285	17.241	2.06218	26.0991	16.1797	22.1496
ZNF354A	zf-C2H2	14.3283	26.3789	13.8047	65.8523	43.7867	67.3964	39.9338	63.7548	45.621	12.2713	61.6082	49.4942	65.6494
ARID3A	ARID	8.05317	10.544	10.0852	7.60726	4.43439	5.72506	4.35284	5.31865	4.8823	3.00509	5.96419	2.96965	4.5801
MSX1	Homeobox	107.947	111.845	114.431	67.1452	49.5226	59.7889	48.4551	20.3409	27.6715	31.6905	15.9777	16.5829	25.6123
